# Supplementary material for: High-Throughput RNA-Seq Data Analysis of the Single Nucleotide Polymorphisms (SNPs) and Zygomorphic Flower Development in Pea (Pisum sativum L.)
Source: MDPI journal article supplement (doi:10.3390/ijms18122710), 2017-12-20
Supplement: s1 [file s1]

## **Supporting information**

**Table S1 The annotation and RPKM of 87,137 reference unigenes in pea**

**Table S2 The SNPs among JI2822, JI992, and Terese**

**Table S3 The 1,798 unigenes representing 1,254 loci on the pea consensus map**

**Table S4 The 10,472 unigenes that were detected with high sequence homology, matching to the unique unigenes of the *Medicago* genome**

**Table S5 The 324 unigenes that were located on the consensus map and identified by comparative mapping of pea relative to *Medicago***

**Table S6 The primary DEGs that were identified among three types of pea petals**

**Table S7 The DEGs preferentially expressed in dorsal, lateral, ventral, dorsal-lateral, dorsal-ventral, and lateral-ventral petals of pea**

**Table S8 The primers used in the qRT-PCR validation of the DEGs identified in this study**

## **Figure S1 Consensus genetic map of pea**

The markers shown on the pea genetic map were based on previously reported map positions [18]. Markers shown in red are SSR markers from a published consensus map [33].
