# Supplementary material for: High-Throughput RNA-Seq Data Analysis of the Single Nucleotide Polymorphisms (SNPs) and Zygomorphic Flower Development in Pea (Pisum sativum L.)
Source: Int J Mol Sci. 2017 Dec 20;18(12):2710. doi: 10.3390/ijms18122710 (PMC5751311; doi:10.3390/ijms18122710)
Supplement: Supplementary file 1 [file ijms-18-02710-s001.zip]

Archive with 10 entries (10 files):
- Figure S1.jpg
- Supporting information.pdf
- Table S1.xlsx
- Table S2.xlsx
- Table S3.xlsx
- Table S4.xlsx
- Table S5.xlsx
- Table S6.xlsx
- Table S7.xlsx
- Table S8.xlsx
