# Supplementary material for: High-Throughput RNA-Seq Data Analysis of the Single Nucleotide Polymorphisms (SNPs) and Zygomorphic Flower Development in Pea (Pisum sativum L.)
Source: Int J Mol Sci. 2017 Dec 20;18(12):2710. doi: 10.3390/ijms18122710 (PMC5751311; doi:10.3390/ijms18122710)
Supplement: Supplementary file 1 [file ijms-18-02710-s001.zip › Table S1.xlsx]

## Sheet: all.gene.rpkm.add
GeneID	Length	JI2822VA_RPKM	JI2822RA_RPKM	JI2822Small_RPKM	JI2822Big_RPKM	JI2822Dp_RPKM	JI2822Lp_RPKM	JI2822Vp_RPKM	TereseVA_RPKM	TereseRA_RPKM	TereseSmall_RPKM	TereseBig_RPKM	TereseDp_RPKM	TereseLp_RPKM	TereseVp_RPKM	JI992VA_RPKM	JI992RA_RPKM	JI992Small_RPKM	JI992Big_RPKM	Description	Pathway	GO Component	GO Function	GO Process
Unigene0000001	289	0.150951	0	0.843858	0.285684	0.784222	0	0.626541	0.196357	0	0	0.190851	0.483765	0.835823	0	0	0.563885	0.108106	0.307046	F6N18.1 [Arabidopsis thaliana]	0	0	GO:0046872//metal ion binding	0
Unigene0000002	365	1.1952	0.315097	0.26726	0.452398	0.124186	0.349202	0.330722	0.155472	0.210655	0	0.0755562	0	0	0	0.191776	0	0.085596	0.0810377	0	0	0	0	0
Unigene0000003	482	0	0	0.910737	0.256938	0.752332	1.05775	0.626108	0.706396	0.239282	0.0729834	0.286079	0.725146	0.37586	0.375528	0.290449	0	0.194456	0.122733	0	0	0	0	0
Unigene0000004	247	0.529855	0.776048	0.394939	0.167131	0.367029	0.77404	0	0.459491	0	0	0.223304	0.849038	0	0.24427	0	0	0.126488	0	hypothetical protein MTR_5g078060 [Medicago truncatula]	0	0	0	0
Unigene0000005	749	0.873659	0.51184	1.23728	0.496037	0.907771	0.850858	1.28933	0.454583	0.359295	0.657533	0.589117	1.58661	1.85438	2.25551	0.327094	0.16318	0.417123	0.157964	0	0	0	0	0
Unigene0000006	476	1.28308	1.61079	2.04937	0.867255	0.952269	1.60662	0.2536	0	0	0	0	0	0	0	0	0	0	0	0	0	0	0	0
Unigene0000007	534	0.0816942	0.0717917	0.456695	0.386529	1.35814	3.10292	1.46936	0	0	0	0	0	0.33926	0.451946	0.327707	0.22888	0.702079	0.332346	0	0	0	0	0
Unigene0000008	550	1.26908	0.836439	1.24155	1.27597	1.40105	2.08569	0.548698	2.88894	3.42507	4.28532	2.70766	5.84652	6.91719	4.93648	0.381808	0.666666	0.397632	0.645355	0	0	0	0	0
Unigene0000009	240	0.727078	0.638946	0	0.172006	0	1.32769	0.502973	0	0.640744	0	0	0	0	0.251395	0	0.509259	0.260354	0.616224	0	0	0	0	0
Unigene0000010	2611	0.735154	0.778188	1.00875	0.664043	0.86802	0.829872	0.855305	0.347742	0.294482	0.296406	0.116185	0.374821	0.925135	0.462159	0.50937	0.468105	0.358972	0.260556	hypothetical protein [Lotus japonicus]	0	0	0	0
Unigene0000011	281	0	0.545719	0.347153	0.293817	0.322619	0.453589	0.214793	0	0	0	0.0981425	0	0.429809	0.429429	0.249104	0.434954	0	0	0	0	0	0	0
Unigene0000012	1699	0	0	0.229665	3.62032	0	0	0	0	0.0905111	4.38949	3.11653	0	0	0	0	0	0.422942	0.905295	RNA0binding region RNP01 (RNA recognition motif) [Medicago truncatula]	0	0	0	0
Unigene0000013	429	0.508446	0.0893631	0.227389	0.384907	0.316979	0.445659	0	0.529111	0	0.082	0.0642845	0.325893	0	0.281281	0.163166	0.189933	0.145653	0.0689482	0	0	0	0	0
Unigene0000014	255	0	0	0.765098	1.2951	0	0	0	0	0	2.3452	0.324447	0	0	0	0	0	0.612599	0	F0box protein [Medicago truncatula]	0	0	0	0
Unigene0000015	211	0.413504	0.181691	0.462322	0.391292	0.42965	1.20814	0.286051	0	0.182202	0.500161	0.261403	0.331299	0	0.285947	0.165872	0	0.592276	0.420551	0	0	0	0	0
Unigene0000016	469	0.651115	0.163483	0	0.17604	0.579889	0.679417	0.51477	0.241992	0	0.150013	0.117604	0.149049	0.257519	0.385937	0.373125	0.0868672	0.266461	0.504542	0	0	0	0	0
Unigene0000017	1142	0.649404	0.704967	0.939624	0.83141	0.873219	1.39512	0.898481	0.546601	0.201986	0.154019	0.144893	0.550908	0.317276	0.21133	0.183883	0.285399	0.410366	0.362612	0	0	0	0	0
Unigene0000018	385	0.226622	0.597456	1.52026	0.857794	0.588676	1.82084	0.940625	0.58958	0.499281	0.822343	0.644681	0.544707	0.941115	1.097	0.363627	0.63492	0.568046	0.768279	0	0	0	0	0
Unigene0000019	280	0	0	0.696786	0.294867	0.323772	0.227605	0	0.202668	0.137302	0	0	0.748972	0	0	0	0	0.334741	0.105638	0	0	0	0	0
Unigene0000020	298	0.146392	0.128647	0	0	0.152107	1.06928	0.405079	0	0.258018	0.354141	0.185087	0	0.40529	0.404932	0.117447	0	0	0.198515	hAT family dimerisation domain containing protein [Oryza sativa Japonica Group]	0	0	GO:0005488//binding	0
Unigene0000021	444	0	0	0	0	0	0	0	0	0.086587	0.158459	0	0	0	0	0	0	0	0	0	0	0	0	0
Unigene0000022	443	0	0	0.110102	0	0	0	0.272491	0	0.0867824	0.158817	0.124506	0	0	0	0	0	0	0.133538	0	0	0	0	0
Unigene0000023	486	0.359051	0.157765	0.903241	0.594587	0	0.393391	0.124191	0.350291	0.553729	0.651444	0.340469	0.143836	0.497022	0.248291	0.576117	1.1736	0.321425	0.36517	0	0	0	0	0
Unigene0000024	427	1.22599	1.16716	1.02804	0.483388	1.1677	0.298498	0.706754	1.19607	0.540205	0	0.839612	1.30968	0.848546	0.282599	0.16393	0.0954115	0.29267	0.346356	0	0	0	0	0
Unigene0000025	895	0.194971	0.0856688	0.272486	0.461244	0.658396	0.854471	0.741815	0	0	0.0786101	0.0308134	0.312421	0.134946	0.539305	0.234631	0.0455204	0.139631	0	0	0	0	0	0
Unigene0000026	1275	0.821171	0.511157	0.459059	0.194265	0.391065	1.19961	0.426048	0.445075	0.331679	0.0275906	0.173039	0.383787	0.28418	0.33125	0.329403	0.255628	0.318551	0.278388	0	0	0	0	0
Unigene0000027	781	1.06129	0.539955	1.5613	0.739998	1.04469	1.71359	1.08194	0.363298	0.541473	0.315296	0.423734	0.984565	0.773216	0.618026	0.358505	0.625978	0.320026	0.302983	0	0	0	0	0
Unigene0000028	404	1.1878	0.759144	1.08657	0	1.45858	1.26197	1.04579	0.561853	0.57096	0.522446	0.136525	1.03818	0.896854	0.448031	0.433157	0	0	0.0732148	0	0	0	0	0
Unigene0000029	288	0.605899	0.133114	1.35486	0	0	0.442565	0	0	0.266976	0	0	0.728168	0	0.209496	0.607623	0.282922	0.216962	0	0	0	0	0	0
Unigene0000030	733	0.119031	0.261506	0.998124	1.35164	0.68023	0.434715	0.576395	0.154835	0.262242	1.53574	1.31682	0.572203	0.32954	0.576185	0.190991	0.666969	0.554097	0.887766	0	0	0	0	0
Unigene0000031	1775	0.761896	0.647946	1.48386	0.790741	1.27685	1.72338	1.49617	0.639404	0.671427	0.812562	0.559329	1.53592	1.22477	1.5976	0.571816	1.14763	0.563246	0.799876	0	0	0	0	0
Unigene0000032	426	0	0	0	0	0	0	0	0	0	0	0	0	0	0	0	0	0	0	0	0	0	0	0
Unigene0000033	418	0.208731	0	0	0.197518	0	0	0	0	0	0	0	0	0	0	0	0	0.0747429	0	0	0	0	0	0
Unigene0000034	993	1.01044	0.810748	1.32621	0.831447	0.867304	1.34775	1.15486	0.971501	0.851744	0.460538	0.777628	0.703969	1.94604	2.4304	1.2336	1.43598	0.660718	0.446809	0	0	0	0	0
Unigene0000035	1159	0.22584	0	0.168335	0.0712361	0.0782192	0.219946	0	0	0	0.0607041	0.0951787	0.482513	0.521037	0.104115	0	0	0.0539129	0	Integrase core domain containing protein [Solanum demissum]	0	0	0	0
Unigene0000036	1078	0.0404682	0	0	0.0765887	0	0	0	0	0	0	0	0.0648461	0	0	0	0	0	0	hypothetical protein VITISV_010898 [Vitis vinifera]	0	0	0	0
Unigene0000037	611	1.57077	1.25489	1.35708	1.08102	1.03861	0.521516	1.48175	0.0928758	0.251683	0.287872	0.0451359	0.114409	0.296505	0.296243	0.286408	1.20022	0.306801	0.145231	PREDICTED: uncharacterized protein LOC101497564 [Cicer arietinum]	0	0	0	0
Unigene0000038	281	0	0	0	0	0.16131	0.226795	0.214793	0	0	0	0	0	0	0	0.124552	0	0	0	PREDICTED: uncharacterized protein LOC101497564 [Cicer arietinum]	0	0	0	0
Unigene0000039	323	0.405183	0.237379	0.151006	0.127806	0.280669	0.591913	0.934316	0	0	0	0	0	0	0	0	0	0	0.0915751	0	0	0	0	0
Unigene0000040	283	0.308302	0.270931	0	0	0.16017	0.225192	0.639825	0.20052	0	0	0	0	0	0	0	0	0	0	0	0	0	0	0
Unigene0000041	1068	0.612706	0.107688	1.18741	0.889017	0.466862	0	0.226055	0.106268	0.143987	0.428197	0.258221	0	0.226173	0.112987	0.262165	0.534054	0.321786	0.0830864	0	0	0	0	0
Unigene0000042	1247	0.349837	0.553378	0.860505	0.761404	0.799692	0.971016	0.91963	0.273041	0.801572	0.564202	0.508657	0.560578	0.532695	1.40313	0	0.522736	0.350758	0.14232	0	0	0	0	0
Unigene0000043	244	0	0.157118	0.399795	0.338372	0.371541	0.522371	1.73155	0	0	0.576689	0.339074	0.286492	1.48496	0.494548	0.143439	0	0	0	0	0	0	0	0
Unigene0000044	416	0.209734	0.64509	0.586238	0.49617	0	0.153195	0.290177	0.272823	0.18483	0.0845625	0	0.336077	0	0	0.0841324	0	0.150204	0	0	0	0	0	0
Unigene0000045	245	0.8903	0.46943	0.199082	0.505486	0.370025	0.520239	0	0	0	0.143584	0.33769	0.285323	0	0	0.285707	0.332577	0.127521	0.482919	0	0	0	0	0
Unigene0000046	448	0.779012	1.19802	0.544364	0.645021	0.303536	1.70703	1.21252	0.760006	0.514883	0.549656	0.738697	1.24829	1.07836	0.942731	0.078123	0.545635	0.348689	0.132048	0	0	0	0	0
Unigene0000047	439	0.993729	1.5719	1.11105	1.22245	0.929276	2.03237	0.412461	1.55117	0.875731	0.320528	0.691021	0.955409	1.37559	0.824621	0.558072	1.57766	0.996345	0.26951	0	0	0	0	0
Unigene0000048	232	0	0	0	1.42349	0	0	0.260159	0.489199	0.497129	0.606517	0.237742	0.602621	0.260294	0	0.452574	0	0	0.382484	0	0	0	0	0
Unigene0000049	274	0	0.559661	0.534033	0.150662	0	0	0.22028	0	0	0	0	0	0	0	0	0	0	0	0	0	0	0	0
Unigene0000050	431	0	0	0	0	2.31373	1.92223	0.280078	0	0	0	0	0	0	0	0	0	0	0	0	0	0	0	0
Unigene0000051	234	0	0	0	0	1.16226	1.63408	0.257935	0	0	0	0	0	0	0	0	0	0	0	0	0	0	0	0
Unigene0000052	239	0	0.481215	0	0.518176	1.13794	1.0666	0	0	0	0.294377	0	0.584971	0.25267	0.504894	0	0.340926	0.392166	0	0	0	0	0	0
Unigene0000053	1436	0.759483	0.720817	0.713284	0.546201	0.97853	1.64205	1.51312	0.553245	0.6693	0.391955	0.249662	1.75247	1.55596	1.34451	0.365589	0.340452	0.217566	0.30897	0	0	0	0	0
Unigene0000054	357	0.122198	0.214772	1.093	0.693804	0.380908	0.357027	0	0.158955	0.107688	0.295613	0.463496	1.17486	1.35324	0	0	0.11412	0.350056	0.0828537	0	0	0	0	0
Unigene0000055	869	0.100402	0	0	0.190018	0.312967	0.146673	0.138911	0	0	0	0	0	0	0	0	0	0	0	PREDICTED: biorientation of chromosomes in cell division protein 10like 10like [Cicer arietinum]	0	0	0	0
Unigene0000056	1016	0	0.0754661	0	0.284419	0.178457	0.0627257	0.356438	0	0	0	0	0	0	0	0	0	0	0	PREDICTED: biorientation of chromosomes in cell division protein 10like 10like [Cicer arietinum]	0	0	0	0
Unigene0000057	285	0.459207	0.26903	1.02684	0.869081	0.477137	2.45973	0	2.19024	0.539573	0.617158	0.483825	1.22639	1.48322	1.05851	0.982431	1.00065	0.767361	0.726496	0	0	0	0	0
Unigene0000058	252	0.865569	0.60852	0.387103	0.491444	1.07924	0	0.479022	0	0.152558	0.139595	0	0.554794	1.67745	0.718271	0	0	0	0	0	0	0	0	0
Unigene0000059	680	1.60385	0.22551	0.573824	0.364247	0.333294	0.843476	0.26628	0.166903	0	0.103465	0	0.1028	0	0	0	0	0	0	0	0	0	0	0
Unigene0000060	461	0	0	0.211605	0.0895473	0	0	0	0	0	0	0	0	0	0	0	0	0	0	0	0	0	0	0
Unigene0000061	504	0.173114	1.5213	1.54841	0.982889	1.43898	2.78183	1.67658	0.112593	0.152558	0.209393	0	1.66438	1.07836	0.718271	0.694426	0.404174	0.123978	0.410816	0	0	0	0	0
Unigene0000062	715	1.95243	1.28683	1.29612	0.981514	0.316979	0.267396	0.759736	0.396833	0.752762	0.4428	0.154283	0.586608	0.929049	0.337537	0.293699	0.17094	0.131088	0	0	0	0	0	0
Unigene0000063	311	0.981906	0	0.784164	0.265475	0	0.409835	0	0	0	0	0	0.449544	0	0	0	0	0	0	0	0	0	0	0
Unigene0000064	289	0.452852	0.530613	0.168772	0.428526	0.156844	0.220517	1.04424	0	0.266053	0.121723	0.0954257	0	0	0.417542	0.242208	0.140971	0.108106	0.102349	0	0	0	0	0
Unigene0000065	269	0.162174	0	0	0	0.674023	1.42147	0.673124	0.421912	0	0.130773	0.102521	0.7796	0	0.448586	0.260216	0.454357	0.232287	0.439833	PREDICTED: auxin0induced protein 10A50like [Cicer arietinum]	ko04075//Plant hormone signal transduction	0	0	0
Unigene0000066	250	0	0.306694	0.5853	0.495376	1.4505	0.254917	0.482854	0.907954	0	0.422136	0.110312	1.11847	0.241553	0.241339	0	0.162963	0	0	0	0	0	0	0
Unigene0000067	936	0.0932152	0.163832	0.781651	1.0585	0.242137	0.204261	0	1.51568	1.76615	1.76642	3.94814	0.448103	0.451621	1.09582	1.08437	1.61048	4.10559	2.71771	senescence0inducible chloroplast stay0green protein [Pisum sativum]	0	0	GO:0005488//binding	0
Unigene0000068	736	0.118545	0	0	0.560888	0.123174	0	0	0	0	0.0955924	0.0749403	0	0	0.163953	0	0	0	0	senescence0inducible chloroplast stay0green protein [Pisum sativum]	0	0	0	0
Unigene0000069	205	0	0	0	1.00686	0	0	0	0	0.375069	0	2.15243	0	0	0.588632	0	0	0	2.1643	PREDICTED: actin0like [Glycine max]	0	GO:0043232	GO:0032550	0
Unigene0000070	272	0.32077	0	0	0.455309	0.166647	0.468598	0.2219	0	0.282681	0.387993	0.10139	0.514001	0	0.221819	0.128673	0.149782	0	0.217491	Pentatricopeptide repeat0containing protein [Medicago truncatula]	0	GO:0031224//intrinsic to membrane	GO:0097159;GO:0046914//transition metal ion binding	0
Unigene0000071	679	0.770981	0.621067	0.79017	0.182392	0.400542	0.750861	0.622235	0.0835745	0.113239	0.621703	0.28431	0.102952	0.088937	0.266575	0.41236	0.360006	0.138038	0.304936	0	0	0	0	0
Unigene0000072	315	0.276982	0.365112	0.929048	0.262104	0.143898	1.01158	0.574827	0.720598	0.244093	0.446705	0.175099	0.221918	0.766834	0	0.777758	0.388007	0.396731	0.0939008	0	0	0	0	0
Unigene0000073	726	0.721069	0.897693	0.739015	0.796059	0.749224	0.526688	0.581952	0.156328	0.105908	0.193818	0.569794	0.192573	0.415897	0	0.723122	0.224467	0.34427	0.325937	0	0	0	0	0
Unigene0000074	574	0.304005	0	0	4.53088	0.0789687	0	0	0.197725	0.133953	0.245143	8.69621	0	0	0	0.121948	0.283907	0.326577	4.79238	unknown [Medicago truncatula]	0	0	0	0
Unigene0000075	381	0.687003	0	0.256037	1.0835	0	0	0	0.297885	0	0.276992	4.41538	0	0	0	0	0	0.246004	1.78559	unknown [Medicago truncatula]	0	0	0	0
Unigene0000076	267	0.490165	0.287167	0.730712	0.154612	0.339536	1.43212	0.452111	0	0	0.131753	0.103288	0.261813	0	0	0.131083	0.152587	0.117013	0.110782	0	0	0	0	0
Unigene0000077	302	0.577811	0.253886	0.161507	1.77701	0.450278	0.422048	0.599571	0	0	0	0	0	0	0	0	0	0	0	0	0	0	0	0
Unigene0000078	363	0.240356	0	0	0	0.624353	0.702251	0.332544	0	0	0	0	0	0	0	0	0	0	0	0	0	0	0	0
Unigene0000079	292	0	0	0	0	0	0	0	0	0	0	0	0	0	0	0	0	0	0	0	0	0	0	0
Unigene0000080	744	0.175906	0.412223	0.721136	0.88777	0.792022	1.28486	1.94699	0.839003	0.671747	0.851081	1.07495	0.751657	0.974003	1.86519	0.376334	0.930903	1.25978	1.07342	0	0	0	0	0
Unigene0000081	201	0	0.572191	1.21331	0	0	0.951183	0	0.282324	0.191267	0.875075	0.686021	0.347782	0.300439	0.600346	0.34825	0.40538	0.932613	0.441474	Carbon catabolite repressor protein0like protein [Medicago truncatula]	0	0	0	0
Unigene0000082	287	0	0	0	0	0.473812	0.444107	1.47212	0	0	0	0	0.487137	0.420824	0.630677	0	0	0	0.206124	0	0	0	0	0
Unigene0000083	377	0	0	0	2.40899	0.240467	1.85948	0	0	0	0.0933104	0	0	0	0	0	0	0	0	0	0	0	0	0
Unigene0000084	834	0	0	0	0.791968	0	0.458484	0	0.136084	0.27658	1.01232	0.198403	0	0	0	0	0.0976996	0.33715	0.212797	0	0	0	0	0
Unigene0000085	927	0.14118	0.413558	0	0.445322	0.39118	0	0	0.367295	0.497665	0.379482	0.416497	0.301636	0.130287	0.260344	0.226531	0.087898	0.269623	0.382897	0	0	0	0	0
Unigene0000086	337	0	0.682554	0.289466	0.734979	0.269009	0.756431	1.791	0.505167	0.114079	0.521929	0.40917	0.622292	0.358387	0.35807	0	0.120892	0.463539	0	F0box/kelch0repeat protein [Medicago truncatula]	0	0	0	0
Unigene0000087	451	0.386915	0.085004	1.51408	0.457664	0.201011	1.13045	1.07063	0.629125	0.511458	0.546	0.550338	0.77499	0.535594	0.40134	0.23281	0.271003	0.34637	0.13117	0	0	0	0	0
Unigene0000088	467	0.373659	0.164183	0.104443	0.265191	0.485311	0.272931	0.646218	0	0	0.0753276	0.354322	0	0	0	0.0749445	0.0872392	0.267602	0	0	0	0	0	0
Unigene0000089	273	0.159797	0.280856	0.714652	0	0	0	0.663261	0	0.281646	0.128857	0.303055	0.512118	1.32721	0.66302	0.128202	0	0	0	transposase related protein [Zea mays]	0	0	0	0
Unigene0000090	1363	0.384077	0.731296	0.429421	2.39268	1.33024	0.841619	1.15134	0.374706	0.310265	0.438757	13.4349	1.33346	1.01902	0.354129	0.410848	0.448357	3.73627	7.85584	PREDICTED: probable purine permease 90like [Cicer arietinum]	0	0	0	0
Unigene0000091	450	0.387775	0.851929	1.08389	1.0091	0.402916	2.12431	1.34126	1.13494	0.0854325	0.390867	0.857983	0.62137	1.87874	0.804464	0.155552	0.0905349	0.347139	0.197192	0	0	0	0	0
Unigene0000092	204	0.427693	0.187925	0.71728	0.607078	0	0	0.591733	0.556344	0	0.689765	0.405559	0	0.296021	0.295759	0.514692	0.199709	0.459449	0.434982	0	0	0	0	0
Unigene0000093	424	0.720219	0.361668	0	0.973616	0.427623	0.90183	0.142351	1.0707	0.634699	1.07857	0.390255	0.329736	0.85455	0.853794	0.16509	0.0960866	0.221056	0.279045	0	0	0	0	0
Unigene0000094	369	0.354672	0.207787	0.396545	0.223747	0.24568	1.72708	0.654274	0.307572	0.833488	0	0.298949	1.32609	1.14558	0	0.189697	0.110408	0.254004	0	0	0	0	0	0
Unigene0000095	203	0.4298	0	0	0.203356	0	0	0	0	0	0	0	0	0	0	0	0	0	0	PREDICTED: uncharacterized protein LOC101507581 [Cicer arietinum]	0	0	0	0
Unigene0000096	461	0.757045	0.831601	0.529013	0.895473	0	0.276483	0.261852	0.86167	0.41697	0.38154	1.73484	0	0	0	0.30368	0.530248	1.76205	1.92487	PREDICTED: uncharacterized protein LOC101507581 [Cicer arietinum]	0	0	0	0
Unigene0000097	206	0.423541	0.372202	0.473544	0.601184	0	0.618731	0.878982	0	0	0.683068	0.267748	0.33934	0.293147	2.63599	0	0	0.606651	0.143586	0	0	0	0	0
Unigene0000098	798	0.21867	0.384329	0.427851	1.55193	0.28401	0.958335	0.30254	0	0	0	0.207354	0.0875991	0	0	0	0.153161	0.0783021	0.296529	F0box/kelch0repeat protein [Medicago truncatula]	0	0	0	0
Unigene0000099	333	0	0	0.585886	0.495872	1.08896	0.382759	0	0	0	0	0	0	0	0	0	0	0	0	0	0	0	0	0
Unigene0000100	665	1.11522	0.922389	0.733459	0.744926	1.6359	2.10834	0.907621	0.938674	1.44529	1.11088	0.58059	0.735833	2.54266	0.90729	0.789453	1.22528	0.516794	0.311355	0	0	0	0	0
Unigene0000101	336	0	0.114098	2.32262	0.122861	0.134905	0	0	0	0.228837	0.418786	0.0820775	0	0.53918	0	0	0	0	0.176064	0	0	0	0	0
Unigene0000102	1121	0.389159	0.341987	0.261062	0.184127	0.52566	0.739055	0.646103	0.607462	0.342949	0.470714	0.590431	0.436511	0.538699	0.376756	0.374656	0.508805	0.390183	0.686037	0	0	0	0	0
Unigene0000103	877	0.298459	0.524563	0.111232	0.188284	0.310112	0.363337	0.137644	0.776471	0.350692	0.280782	0.660363	0.159416	0	0.275187	0.159631	0.325182	0.142497	0.539635	0	0	0	0	0
Unigene0000104	238	0.733188	0	0.819748	0.346902	0.571362	0.26777	0	0.476866	0.80766	0.44342	0.115874	1.46857	0.761196	0.507015	0.147055	0.342359	0.262542	0.248561	0	0	0	0	0
Unigene0000105	210	0	0	0	0.393155	0	0.910418	0.287413	0.270224	0.366139	0.502543	0.393972	0	0	0.287309	0.333325	0	1.19019	0.140851	0	0	0	0	0
Unigene0000106	319	0.410264	0.360534	0.1529	0.517634	0.852565	1.19867	0.567619	0.355781	0.120516	0	0.259355	0.43827	0.378609	0	0.43886	0.127714	0.195878	0	0	0	0	0	0
Unigene0000107	374	0.466574	0.512524	0	0.220756	0.242396	0.170399	0	0	0.205586	0	0.221214	1.30837	1.45319	0	0	0	0	0	0	0	0	0	0
Unigene0000108	338	0	0.226845	0	0	0.670533	0	0	0	0	0.104077	0.163184	0	0	0	0	0	0	0	0	0	0	0	0
Unigene0000109	242	0.180267	0.792082	0	0.341168	0.374612	0.790033	0.249408	0.937969	0	0.145364	0.455835	0.28886	0	0	0.578497	0.84175	0.387304	0.122226	0	0	0	0	0
Unigene0000110	332	0.394199	0.461889	0.146913	0.870389	0.682651	0.383911	0.908988	0.34185	0.115797	0.953621	0.332265	0.210554	0.363784	0	0.527095	0.490852	0.564624	0.445463	0	0	0	0	0
Unigene0000111	224	0.389506	0.342293	0	0.184292	0.607072	0	0.80835	0.760006	0.171628	0	0.246232	0.936216	0.26959	0.538704	0	0.363756	0.139476	0.528192	RNA0directed DNA polymerase (Reverse transcriptase); Chromo; Zinc finger, CCHC0type; Peptidase aspartic, active site; Polynucleotidyl transferase, Ribonuclease H fold [Medicago truncatula]	0	0	GO:0005488//binding;GO:0003824//catalytic activity	GO:0044260;GO:0090304
Unigene0000112	536	0.406947	0.858286	1.00098	0.462104	1.09937	0.832286	1.12606	0.846972	0.5738	0.262522	0.411612	1.04334	0.450658	0.45026	0.261187	0.228026	0.116577	0	0	0	0	0	0
Unigene0000113	506	0.258644	0.454586	0.481967	0.652669	0.268743	1.25947	0.477129	0.560742	0.91173	0.278087	0.708526	0.828902	0.83541	0.476955	0.622513	0.724637	0.74093	0.876841	Ribonuclease H [Medicago truncatula]	0	0	0	0
Unigene0000114	725	0.661892	0.528783	0.605483	0.227759	1.06286	1.58224	1.33201	0.704447	0.318162	0.485214	0.304309	0.867775	0.333176	0.416102	0.144824	0.168582	0.0861863	0.163193	0	0	0	0	0
Unigene0000115	1284	0.339756	0.77629	0.531815	0.643011	0.917857	1.6379	0.752109	0.39776	0.479061	0.49315	0.558434	0.979964	1.08172	0.892805	0.299836	0.222107	0.267654	0.115182	0	0	0	0	0
Unigene0000116	820	0.585209	0.841539	1.13015	0.503431	0.773893	0.854905	0.588847	0.899649	0.375069	0.858	1.14348	1.02299	0.589153	1.398	0.640227	1.14273	0.495308	0.937863	0	0	0	0	0
Unigene0000117	616	0.779012	0.311175	0.712622	0.469106	0.294338	0.517283	0.195964	0.368488	0.18723	0.7995	0.537234	0.680884	0.392131	0.783569	0.624984	0.26455	0.608621	0.288105	Endonuclease/exonuclease/phosphatase [Medicago truncatula]	0	0	0	0
Unigene0000118	366	1.19193	0.209491	0.79959	1.2407	0.495388	0.174124	1.15436	0	0.31512	1.05726	0.452099	0.38199	0.98997	0.824246	0.765007	0.667881	0.256086	0.323265	Cysteine0rich receptor0like protein kinase [Medicago truncatula]	0	0	GO:0016772//transferase activity, transferring phosphorus0containing groups	0
Unigene0000119	222	0.393015	0.172688	0.659122	0.371904	0.20418	0.574138	0.543755	0	0.346348	0	0.124225	0.314883	0	0.271778	0	0.734067	0.281464	0	0	0	0	0	0
Unigene0000120	352	0.743603	1.74258	0.692827	0.351829	1.03018	1.26734	0.342936	1.12849	1.20139	0.699563	1.25355	0.794365	1.02934	2.05687	0.298288	0.462963	1.2426	1.68061	0	0	0	0	0
Unigene0000121	275	0	0.139406	0	1.95148	0.164829	0	0	0	0.559194	0.25584	2.10596	0	0	0	0	0.296296	0.227218	0.537796	0	0	0	0	0
Unigene0000122	250	0	0	0	0	1.63181	2.03934	1.20714	0	0	0	0	0	0	0	0	0	0	0	0	0	0	0	0
Unigene0000123	287	0	0	0.169948	0.863024	0	0.66616	0.420605	0	0	0.245143	0	0	0	0.630677	0	0.567815	0	0	0	0	0	0	0
Unigene0000124	244	0.893949	0.628472	0.399795	0.507557	0.185771	0	0.247364	0.93028	0.31512	1.87424	0.678148	0.572984	1.48496	0.494548	3.58597	1.83667	1.28043	1.93959	NB0LRR type disease resistance protein Rps10k02 [Medicago truncatula]	0	0	GO:0016876//ligase activity, forming aminoacyl0tRNA and related compounds;GO:0032550	GO:0006950//response to stress
Unigene0000125	218	0.400227	0	0.447477	0.189364	0	0.584672	0	0	0	0	0	0	0	0	0	0	0	0	0	0	0	0	0
Unigene0000126	301	0.724663	0.254729	0.648173	0.685736	1.05414	1.48208	1.0026	0.188529	0.510892	0.11687	0	1.62568	1.00313	0.801791	1.04648	0.947458	1.03796	0.393073	0	0	0	0	0
Unigene0000127	641	1.08892	0.657886	1.06529	0.837219	0.848575	1.69017	0.847443	0.796761	0.659736	0.548799	0.688375	1.63582	1.41314	1.03539	0.655209	1.01693	0.974806	0.276868	0	0	0	0	0
Unigene0000128	728	1.01871	1.42183	1.20598	0.567051	0.933957	0.787862	0.994892	0.233848	0.158426	0.483214	0.530347	0.672155	0.414754	1.40892	0.192303	0.951363	0.300409	0.325041	0	0	0	0	0
Unigene0000129	962	0	0.0797023	0.507017	0.128736	0.188474	0.264987	0.250964	0.0589887	0.359669	1.2433	0.430011	0	0.87883	0.564463	0	0.2541	0.58458	0.338219	0	0	0	0	0
Unigene0000130	873	0	0	0.111741	0	0	0.146001	0.138274	0	0.0440374	0.0805911	0.22113	0	0.138346	0	0	0	0.0715751	0	0	0	0	0	0
Unigene0000131	293	0.595559	0.915896	0	0.704459	0.773516	0.435012	0.617988	0.387352	0.13121	0.240123	0	0.477161	0.206103	0.205921	0.477803	0.41714	0	0.201903	0	0	0	0	0
Unigene0000132	285	0	0.53806	0.342281	0.724234	0.159046	0	0	0	0	0	0	0	0	0	0.122804	0	0	0	Integrase, catalytic region; Zinc finger, CCHC0type; Peptidase aspartic, catalytic [Medicago truncatula]	0	0	GO:0004175//endopeptidase activity;GO:0046914//transition metal ion binding;GO:0003676//nucleic acid binding;GO:0034061	GO:0006259//DNA metabolic process;GO:0019538//protein metabolic process
Unigene0000133	247	1.23633	1.24168	0.19747	0	0	0.516027	0	0.689236	0.311292	0	0	0.566025	0	0.24427	0	0	0	0.119752	0	0	0	0	0
Unigene0000134	379	0.115105	0.202305	0	2.06951	0	0	0	0.299457	0.101437	0.278454	1.74637	0	0.318671	0	0.184692	0.214991	0.741907	0.936531	Subtilisin0like protease [Medicago truncatula]	0	GO:0030312//external encapsulating structure	GO:0004175//endopeptidase activity;GO:0016628//oxidoreductase activity, acting on the CH0CH group of donors, NAD or NADP as acceptor;GO:0005515//protein binding	GO:0010101;GO:0009725//response to hormone stimulus;GO:0044092//negative regulation of molecular function;GO:0019538//protein metabolic process;GO:0019758
Unigene0000135	503	0.346916	0.381081	0.872714	0.0820702	0.360461	1.26698	0.719962	0.564087	0.229292	0.7693	0.548271	0.138974	0.480224	0.2399	0.139161	0	0	0.0588047	0	0	0	0	0
Unigene0000136	336	0.129835	0.342293	0.435491	1.22861	0.674524	1.32769	1.25743	0.844451	0.228837	0.314089	0	0.416096	0.359454	1.25698	0.833312	0.363756	0.650886	0.176064	0	0	0	0	0
Unigene0000137	257	0.509238	0.596681	0.759144	0.160628	0.529121	0.991896	0.234851	0.662418	0.59836	0	0	0.544001	0.469947	0	0.272366	0.634097	0.364699	0	0	0	0	0	0
Unigene0000138	728	0.359544	0.631925	1.13898	2.77855	0.311319	0.612782	1.49234	0.701544	0.792128	1.54629	5.79593	0.864199	0.912459	1.74043	0.721135	1.39906	6.43734	4.55058	Thermosensitive gluconokinase [Medicago truncatula]	ko00030//Pentose phosphate pathway	GO:0044424//intracellular part	GO:0016301//kinase activity	GO:0044238//primary metabolic process;GO:0006796//phosphate0containing compound metabolic process
Unigene0000139	630	0.830947	1.33874	1.16131	0.917363	1.00729	0.910418	1.24546	0	0.0610232	0.167514	0.0875493	0	0.0958543	0	1.05553	0.970017	0.942235	0.751207	0	0	0	0	0
Unigene0000140	206	1.27062	0.930504	0.236772	0	0	0	0	0.826414	0.186624	0	0	0	0	0	0	0.19777	0	0	0	0	0	0	0
Unigene0000141	443	0	1.38462	0.770711	1.11823	0.613924	0.863151	0.817473	1.66527	0.520695	0.635269	1.12055	0.315594	0.408949	0.817176	0.474028	1.19555	0.634724	0.667692	0	0	0	0	0
Unigene0000142	489	0.713697	0.156797	1.19693	0.590939	0	1.04261	0.123429	0.696284	0	0.287755	0.338381	0	0.493973	0.61692	0.429437	0.166629	0.638907	0.181465	0	0	0	0	0
Unigene0000143	265	0.164622	0	0	0.155779	2.22364	2.40488	1.36657	0	0.145074	0	0.104068	0	0	0	0	0	0	0	PREDICTED: UDP0glycosyltransferase 85A30like [Cicer arietinum]	0	0	GO:0035251//UDP0glucosyltransferase activity	0
Unigene0000144	551	0	0	0	0.149841	0.32906	0.346983	0.657243	0	0	0	0.55056	0.253735	0.219195	0	0.381115	0.147879	0.283508	0.483138	0	0	0	0	0
Unigene0000145	440	0.099147	0.261387	0.110852	0	0.206036	0.289679	0.411524	0.257941	0.524245	0.07995	0.125355	0	0.137246	0.274249	0	0	0.0710058	0.0672245	0	0	0	0	0
Unigene0000146	255	0	0.300681	0	0.323775	0.355514	0.999675	0.473387	0	0	0	0	0.274134	0	0	0	0	0	0	0	0	0	0	0
Unigene0000147	319	0.273509	0.240356	0.1529	0.776451	0.710471	0.799113	0.756825	0	0.120516	0.220552	0	0.219135	0.567914	0.945687	0	0.255428	0.195878	0.0927234	0	0	0	0	0
Unigene0000148	345	1.01159	1.33345	0.706884	0.239312	0.525542	1.29306	0.874736	0.493453	0.445735	0.713757	0.159873	0.607862	0.175038	2.62325	0	0.118089	0	0.171471	0	0	0	0	0
Unigene0000149	696	1.1909	0.936387	1.05119	1.30487	0.716391	0.732521	0.346878	1.30453	0.386656	0.454888	0.832096	0.502185	0.433823	0.173376	0.704005	0.585355	1.12222	0.169993	0	0	0	0	0
Unigene0000150	203	0	0	0	0	0.223291	0.627875	0.594648	0	0	0	0	0	0	0	0	0	0	0	0	0	0	0	0
Unigene0000151	1748	1.24785	0.943067	0.809196	1.48783	0.363039	0.729168	1.13946	0.227248	0.483857	0.38237	1.70391	0.639854	0.172735	0.724846	0.640716	0.839054	0.732805	1.38756	LG27/300like gene [Medicago truncatula]	0	GO:0031090//organelle membrane	GO:0003824//catalytic activity;GO:0005488//binding	GO:0044238//primary metabolic process
Unigene0000152	317	0.275235	0.362809	0.461593	0.390675	0.428972	0.603116	0.3808	0.358026	0	0.221943	0.0869969	0	0.190499	0.570992	0	0	0.492784	0	0	0	0	0	0
Unigene0000153	201	0.434077	0	0.727985	0	0.451025	0	0	0.282324	0	0	0	0	0.300439	0	0.174125	0.20269	0.155435	0	CCR40NOT transcription complex subunit [Medicago truncatula]	0	0	GO:0046872//metal ion binding;GO:0097159	0
Unigene0000154	350	0.62321	0.109534	0.278714	0.35384	0.388526	0.728335	1.20714	0.162135	0.109842	0.402034	0.157589	0	0.172538	0.34477	0.0999974	0.116402	0	0	0	0	0	0	0
Unigene0000155	299	0.437706	0.512867	0.489381	0	0.303197	0	1.00931	0.18979	0	0.470609	0.461171	0	1.00984	0.403577	0.117054	0.272513	0.626941	1.08818	0	0	0	0	0
Unigene0000156	265	0.493865	0.868003	0.920283	0.467336	0.171049	0.721464	1.36657	0.85656	0.435222	0.265494	0.312204	0	0	0	0.132072	0.922431	0.117896	0.892944	0	0	0	0	0
Unigene0000157	812	0	0	0.120136	0	0.279113	0	0.148662	0	0.0946912	0.0866453	0.135852	0	0	0.148608	0.0862046	0	0	0.0728541	PREDICTED: LOW QUALITY PROTEIN: uncharacterized LOC101208986 [Cucumis sativus]	0	0	0	0
Unigene0000158	744	0.117271	0.206112	0.327789	0	0	0	0.162249	0	0	0	0.296538	0.375828	0.487002	0	0.188167	0	0.167971	0.0397564	PREDICTED: LOW QUALITY PROTEIN: uncharacterized LOC101208986 [Cucumis sativus]	0	0	0	0
Unigene0000159	272	0.32077	0.140944	0.35864	0.303539	0.833236	0.234299	0	0	0	0	0	0.257	0	0	0.900712	0	0	0.326236	0	0	0	0	0
Unigene0000160	337	0.647251	0	0	0.489986	0.941532	0.945538	0.537301	0.336778	0	0.313157	0.0818339	0	0	0	0.311565	0.241785	0	0.263312	0	0	0	0	0
Unigene0000161	829	0.263116	1.61856	1.00021	1.24491	0.218712	0.691874	0.728067	1.02679	0.510121	0.29704	0.532266	0.337294	0.437068	0.509462	2.0687	1.52348	0.640679	0.3568	PREDICTED: filament0like plant protein0like [Fragaria vesca subsp. vesca]	0	0	0	0
Unigene0000162	204	0.213847	0.375851	1.43456	0	0	0.312398	0.295867	0	0.376908	0	0.135186	0	0.888062	0	0	0	0	0	0	0	0	0	0
Unigene0000163	1280	0.95429	0.299506	0.724004	0.387012	0.42495	0.697039	0.188615	0	0.150174	0	0.150817	0.21845	0.330248	0.471366	0	0.0318287	0.0488165	0.0462168	disease resistance protein [Brassica rapa subsp. pekinensis]	0	GO:0005622//intracellular	GO:0003676//nucleic acid binding;GO:0003824//catalytic activity	GO:0006259//DNA metabolic process;GO:0034645//cellular macromolecule biosynthetic process
Unigene0000164	402	0.217038	0.572191	0.727985	0.718829	0.563781	0.475592	0.450424	0	0.0956334	0.437537	0.205806	0	0.300439	0	0.0870624	0.101345	0.466306	0.515053	0	0	0	0	0
Unigene0000165	205	0.212803	0.374017	0.237927	0.604117	1.7689	0.932624	0.88327	0.276815	0	0.1716	0.269054	0	0.88373	1.7659	0	0	0	0.144287	PH01B001G05.7 [Phyllostachys edulis]	0	0	GO:0046914//transition metal ion binding;GO:0003676//nucleic acid binding;GO:0034061	GO:0006260//DNA replication
Unigene0000166	238	0	0	0.409874	0.173451	0	0.80331	0.2536	0	0	0	0	1.76229	0	0.253508	0.29411	0.171179	0.525085	0.124281	0	0	0	0	0
Unigene0000167	265	0.329243	0.289334	0.184057	0	0.855246	0.721464	0.227761	0	0.145074	0.265494	0	0.263789	0.91152	0.683036	0	0.153739	0	0.446472	0	0	0	0	0
Unigene0000168	217	0	0	0	0	0.626655	0	0.278142	0	0.354328	0	0	0	0	0	0	0.187745	0	0	0	0	0	0	0
Unigene0000169	319	0.683773	1.20178	0.458699	0.517634	0.284188	0.799113	0.189206	2.31258	2.2898	2.31579	0.0864515	1.31481	0.946523	2.45879	1.09715	2.55428	0.489695	0.185447	0	0	0	0	0
Unigene0000170	273	0.479392	0.280856	0.535989	0.302427	0.332073	0.700322	0	0.831459	0.985759	0.773143	0.202037	1.28029	0	0	0.256404	0.596934	0.457766	0.866777	0	0	0	0	0
Unigene0000171	322	1.76125	0.595292	0.605901	0.641014	1.12616	1.58334	0.374887	1.40987	1.55211	0.873988	0.770814	1.08547	1.12525	0.749501	1.63039	1.13872	1.8435	0.918595	0	0	0	0	0
Unigene0000172	272	0.64154	0.140944	1.25524	0.455309	0.333294	1.40579	0.6657	0.208629	0.706702	0.258662	0.608339	0	0.666046	1.33091	0.386019	0.449346	0.574311	0.217491	PH01B031C15.25 [Phyllostachys edulis]	ko00230//Purine metabolism	0	GO:0016772//transferase activity, transferring phosphorus0containing groups;GO:0003676//nucleic acid binding;GO:0046914//transition metal ion binding	GO:0006259//DNA metabolic process;GO:0005975//carbohydrate metabolic process
Unigene0000173	281	0.155248	0.27286	0.173577	0.734543	0.483929	0.226795	1.93314	0.605841	0.273627	0.500754	2.74799	0.746307	0.644714	1.503	0	0.724924	0.889467	1.99999	PREDICTED: LOW QUALITY PROTEIN: uncharacterized LOC101222318 [Cucumis sativus]	0	GO:0043231//intracellular membrane0bounded organelle	0	0
Unigene0000174	247	0.706473	0	0	0.167131	0.367029	0.77404	0.488719	0	0	0.142421	0	0	0	0	0.141697	0	0.758928	0.479008	0	0	0	0	0
Unigene0000175	1047	0.91666	0.43939	0.279513	0.157713	0.303053	0.426079	0.691768	0.270999	0.330469	0.335989	0.23706	0.200298	0.115355	0.461011	0.300852	0.311295	0.23872	0.254259	0	0	0	0	0
Unigene0000176	203	0	0	0	0	0	0	0.297324	0	0	0	0	0	0	0	0	0	0	0	0	0	0	0	0
Unigene0000177	251	0.173804	0.458209	0.388646	0.164467	1.08354	0	0.240465	0	0	0	0	0	0.24059	0	0	0.162314	0	0	0	0	0	0	0
Unigene0000178	498	0	0.153963	0.293825	0.165788	0.364081	0.511882	0.242397	0	0	0.211916	0.110755	0	0.242523	0	0.140559	0.245426	0	0.11879	PREDICTED: protein ZINC INDUCED FACILITATOR0LIKE 10like [Cicer arietinum]	0	GO:0031224//intrinsic to membrane;GO:0044464//cell part	GO:0015144//carbohydrate transmembrane transporter activity	GO:0050896//response to stimulus;GO:0044763;GO:0044765
Unigene0000179	418	0	0	0.70012	0.197518	0	0	0	0.678793	0.275918	0.757421	0	0.501704	0	0	0.25119	0.389863	0.0747429	0	PREDICTED: protein ZINC INDUCED FACILITATOR0LIKE 10like [Cicer arietinum]	0	GO:0031224//intrinsic to membrane	0	GO:0044763
Unigene0000180	566	0.462453	0.47413	1.55115	0.437611	0.400424	0.675576	1.38629	0.30078	0.475463	0.435064	0.341071	0.741033	0.960236	0.74619	1.17488	0.57584	0.331193	0.156778	Tir0nbs0lrr resistance protein [Medicago truncatula]	0	0	GO:0016462//pyrophosphatase activity;GO:0032550	GO:0006950//response to stress;GO:0007154//cell communication
Unigene0000181	952	0.458243	0.644316	0.71728	1.38761	0.999883	1.20497	0.8876	0.536475	0.767277	0.554275	0.898024	1.17486	0.380598	0.887277	0.367637	0.556333	0.492267	0.776753	cysteine0rich receptor0like protein kinase 8 [Arabidopsis thaliana]	0	0	0	0
Unigene0000182	896	1.2659	0.427866	0.816546	0.783239	0.961197	0.426759	0.606262	0.443337	0.386162	0.745962	0.400128	0.936216	0.336988	0.471366	0.429676	0.181878	0.453296	0.297108	0	0	0	0	0
Unigene0000183	604	0.505584	0.253886	0.403767	0.136693	0.82551	0.633072	0.299785	0.375809	0	0.291209	0.273954	0.115735	0	0.399568	0.0579455	0.134903	0	0.0979429	0	0	0	0	0
Unigene0000184	492	0	0	0	2.26544	0	0	0	0	0	0	1.45738	0	0	0	0	0	0	1.44287	HAT family dimerization domain containing protein [Medicago truncatula]	0	0	GO:0003676//nucleic acid binding;GO:0005515//protein binding	0
Unigene0000185	239	0	0	0	0.172725	0.379314	0.26665	0	0.949742	0.482568	0.88313	0.923114	3.50983	2.77937	2.27202	0.878638	1.02278	0.784331	0.495042	0	0	0	0	0
Unigene0000186	289	0.905703	0	0.337543	0.285684	0.313689	0.882066	1.46193	0	0	0.243446	0.190851	0.967531	0	1.25263	0	0	0	0	0	0	0	0	0
Unigene0000187	1132	0.655141	0.507996	0.732487	0.619949	1.92204	1.01336	1.65288	0.701819	0.645272	0.435064	0.755229	0.741033	1.01358	1.11929	0.649276	0.647821	0.634786	0.679371	IST10like protein [Medicago truncatula]	0	0	0	0
Unigene0000188	659	1.52256	0.814439	1.48027	1.56606	0.962963	2.22424	0.274765	0.602777	0.758391	0.800713	0.962511	0.742532	1.19127	0.549331	1.22152	1.48373	0.995589	0.852802	0	0	0	0	0
Unigene0000189	334	0.130613	0	0	0.123597	0.542851	2.48048	0.361418	0.169902	0.115104	0	0.082569	0.418587	0.361606	0	0	0	0.0935405	0.0885592	0	0	0	0	0
Unigene0000190	268	0.813894	1.85962	0.181996	1.07824	0	1.18898	1.12606	0.423486	0.5738	0.262522	0.411612	0.260836	0.901316	0.900519	0.783562	0.760088	0.582883	0.441474	0	0	0	0	0
Unigene0000191	271	1.28781	0.990249	0.719926	0.456989	1.00357	1.88131	2.44991	0.209399	0.851172	1.29808	0.814112	2.83744	2.45118	1.11319	0.774888	1.20268	0.115286	0.218293	0	0	0	0	0
Unigene0000192	470	0.928185	0.815676	0.415106	0.526996	0.38577	2.16951	1.41261	1.32812	0.654376	0.673621	0.469413	1.63605	0.770913	0.385116	0.521263	1.21355	0.930629	0.755202	0	0	0	0	0
Unigene0000193	352	1.1154	0.544557	0.554262	0.586382	0.257546	1.26734	0	0	0.764524	0.499688	0.47008	0.992956	0.686229	0.685623	0.696005	0.810185	1.59763	0.840306	0	0	0	0	0
Unigene0000194	219	0.796798	0.350108	0.445434	0.376998	0.620932	1.16401	0.275602	0	0.702185	0.32126	0.125927	0	0.55149	0.275501	0.639253	0.372061	0.42798	0	0	0	0	0	0
Unigene0000195	282	0.773488	0	0.518883	0.146388	0.321475	0.903962	0.856125	0	0.272657	0	0	0	0.214143	0	0.12411	0.144471	0	0	0	0	0	0	0
Unigene0000196	280	0	0	0.348393	0.294867	1.45697	1.59323	0.21556	0	0.274604	0	0.393972	0.748972	1.29403	0.430963	0	0	0	0.211277	0	0	0	0	0
Unigene0000197	883	0.0494051	0	0.441903	0.0935024	3.90139	1.3713	0.546834	0.257065	0.30477	0.438231	0.312322	3.325	3.21432	0.614964	0.158546	0.0922779	0.283058	0.50247	0	0	0	0	0
Unigene0000198	674	0.38835	0.910072	1.80916	0.36749	0	0.378215	0.537301	1.68389	0.969671	0.469736	0.572837	0.207431	0.53758	0	0.934694	0.483569	0.324477	0.0877708	0	0	0	0	0
Unigene0000199	766	0.797318	0.25024	0.955124	0.323352	0.414225	0.748778	0.315179	0.29633	0.40151	0.275546	0.216016	1.00384	0.709522	0.630128	0.274144	0.319118	0.163146	0.231687	0	0	0	0	0
Unigene0000200	201	0	0.19073	0.485324	0.410759	0	0	0	0	0	0	0.137204	0	0.600878	0.900519	0	0.20269	0	0	0	0	0	0	0
Unigene0000201	206	1.05885	1.86101	0.473544	1.40276	0.220039	0.309365	0	0	0	0	0	0	0	0	0.679594	2.37325	0.909977	0.717931	0	0	0	0	0
Unigene0000202	218	0	0	0	0.378728	0	0	0	0	0	0	0	0	0	0	0	0	0	0	0	0	0	0	0
Unigene0000203	250	0	0	0.7804	0.330251	0	0	0	0	0	0	0	0	0	0	0	0	0	0	0	0	0	0	0
Unigene0000204	264	0.33049	0	0.554262	0.156369	1.03018	0.965595	1.14312	1.50466	0.145624	0.66625	0.104462	0.794365	0.686229	1.1427	0.132572	0.154321	0.118343	0.224082	0	0	0	0	0
Unigene0000205	383	0	0	1.91025	1.61676	0	0	0.15759	0.740824	1.00378	0.826637	0	0	0	0	0.456907	3.82941	2.20248	3.08917	hypothetical protein MTR_5g095640 [Medicago truncatula]	0	0	0	0
Unigene0000206	324	0	0.236647	0.15054	0.254823	1.53891	2.16365	0	0	0	0	0.170235	0.215753	0	0	0.648131	0	0.0964276	0.36517	hypothetical protein MTR_4g065480 [Medicago truncatula]	0	0	0	0
Unigene0000207	319	0.410264	0.120178	1.8348	0.776451	0.284188	0.399557	0.189206	0	0.120516	0	0.0864515	0	0	0	0	0	0.293817	0.0927234	0	0	0	0	0
Unigene0000208	501	0.783677	0.382603	1.16826	1.23597	0.723801	1.27204	1.08425	1.24594	0.844093	0.491509	0.770644	0.837175	1.20535	1.80643	0.279434	0.731869	0.561243	0.944631	0	0	0	0	0
Unigene0000209	305	0.858191	0.754166	0.959508	0.406046	0.297233	0	0.791564	0.186056	0.504192	0.461351	0.0904198	0.458387	1.38596	1.38473	0.114751	0.801457	0.204869	0.678857	hypothetical protein VITISV_011880 [Vitis vinifera]	0	0	0	0
Unigene0000210	895	0.438684	0.771019	0.762961	0.415119	1.36744	0.640853	0.876691	0.443832	0.128865	0.47166	0.0924403	0.624841	0.674728	1.34826	0.0782103	0.500724	0.0698157	0.165244	Ty3/gypsy retrotransposon protein [Beta vulgaris subsp. vulgaris]	0	0	GO:0003676//nucleic acid binding;GO:0003824//catalytic activity	GO:0006259//DNA metabolic process
Unigene0000211	435	1.20344	1.32196	0.224253	0.474498	0.521012	0.146504	0.277502	0.130453	0.353514	0.242607	0.0633978	0.482097	0.277647	0.416102	0.482746	0	0.143644	0.203991	0	0	0	0	0
Unigene0000212	1287	0.440654	0.595754	1.59173	0.801891	0.563519	1.13891	0.797254	0.705481	0.776659	0.765333	0.664273	0.48884	0.797668	1.40641	0.598275	0.664767	0.558336	0.574568	0	0	0	0	0
Unigene0000213	921	0.947333	0.624378	1.00622	0.58269	0.442945	0.968741	0	0.492917	0.292196	0.305564	0.179661	0.1518	0.393408	0.19653	0.456014	0.619294	0.712371	0.224811	0	0	0	0	0
Unigene0000214	274	0	0	0	2.56125	0	0	0	0	0	0.128387	0.402599	0	0	0	0	0	0.114024	1.83518	F0box/kelch0repeat protein [Medicago truncatula]	0	0	0	0
Unigene0000215	1879	2.13596	2.65236	1.03832	0.768944	0.144741	0.135666	0.128487	1.47983	1.30945	1.49773	0.880618	0.26042	0.224969	0.706421	0.689178	1.08411	0.332544	0.692637	PREDICTED: F0box/LRR0repeat protein 30like [Cicer arietinum]	0	GO:0043231//intracellular membrane0bounded organelle	GO:0019787//small conjugating protein ligase activity	GO:0009404//toxin metabolic process;GO:0032446//protein modification by small protein conjugation
Unigene0000216	541	0.0806372	0	0.180314	0.0763056	0	0	0	0	0	0	0	0	0	0	0	0	0	0	PREDICTED: F0box/LRR0repeat protein 30like [Glycine max]	0	0	0	0
Unigene0000217	399	0.109335	0.672575	0	0.413848	0.454416	0.958335	1.21016	0.568893	0	0.0881654	0.0691179	0.175198	0.756744	0.30243	0	0.102107	0.861323	0.444793	0	0	0	0	0
Unigene0000218	625	0.418797	0.674727	0.62432	0.726551	1.23292	0.917702	0.965709	0.453977	0.492091	0.844272	0.926622	1.00662	0.966211	1.83418	0.0559985	0.13037	0.24994	0.520586	0	0	0	0	0
Unigene0000219	410	0.425607	0.374017	0.237927	0.100686	0.442225	0.621749	0.441635	0	0	0	0.470844	0	0.441865	0	0.512182	0.695573	0.0762013	0.0721433	0	0	0	0	0
Unigene0000220	204	0	0.751702	0	0.404719	0	0	0.591733	0	0.376908	0.172441	0	0	0	0	0	0	0	0	0	0	0	0	0
Unigene0000221	955	0.730885	0.441576	0.91932	0.734851	0.474639	0.667322	0	0.297105	0.845379	0.478863	1.12622	0.36599	1.26467	0.884489	0.293186	0.511925	0.0981441	0.12389	0	0	0	0	0
Unigene0000222	380	0.803613	0.605318	0.128355	0.43454	0.357853	1.34167	0.317667	0.746672	0.50585	0.462868	0.145148	0	0.794582	1.58776	0.0921029	0.321637	0.164434	0.389194	0	0	0	0	0
Unigene0000223	213	0.409622	0.179985	0.457981	0	0.425615	0.598397	0.283365	0	0	0	0	0	0	0	0	0.382542	0	0.277735	0	0	0	0	0
Unigene0000224	242	0.901337	0.158416	0	0.341168	0	0	0.498816	0	0	0.290727	0	0.28886	0	0	0.144624	0.3367	0	0	0	0	0	0	0
Unigene0000225	207	0	0.185202	0.706884	0.199427	0.218976	0.307871	0	0	0	0	0	0.337701	0.583461	0.582945	0	0	0	0	Integrase core domain containing protein [Solanum demissum]	0	GO:0043231//intracellular membrane0bounded organelle	GO:0003676//nucleic acid binding;GO:0043167//ion binding	GO:0006259//DNA metabolic process
Unigene0000226	204	0.427693	0.375851	0.956373	0	0.222196	0	0.8876	0	0	0.172441	0.135186	0.685334	0.296021	0.591518	0	0	0	0.144994	0	0	0	0	0
Unigene0000227	740	0.884284	0.414452	0.59321	0.557856	0.428779	0.688965	0.489379	0.920223	0.259761	0.142614	0.857155	0.75572	0.816057	0.570735	0.520257	0.99099	0.464416	0.0799426	0	0	0	0	0
Unigene0000228	687	0.635003	0.334819	0.49698	0.600893	0.329898	0.649352	0.351422	0.660811	0.279801	0.409642	0.521855	0.814021	0.0879013	0.526942	0	0	0	0	0	0	0	0	0
Unigene0000229	364	0.59924	1.15853	1.07198	1.1341	1.3698	2.45113	0.994892	0.623595	0.633702	0.966429	1.43951	1.15227	0.663607	1.16028	0	0	0	0	0	0	0	0	0
Unigene0000230	342	0.637788	0.784671	1.14094	0.724234	0.397614	1.3044	0.529446	0.165927	0.337233	0.205719	0.32255	0.408796	1.41259	0.529253	0.102337	0	0.182705	0.34595	0	0	0	0	0
Unigene0000231	273	0.319595	0.702139	0.893315	0	0.664147	0.233441	0	0	0.844937	0.257714	0.202037	0.256059	0.221202	0.442013	1.15382	0.298467	0.457766	0.325041	0	0	0	0	0
Unigene0000232	349	0.124999	0	0	0.473138	0	0.913027	1.38354	0	0	0	0	0	0	0	0	0	0	0	0	0	0	0	0
Unigene0000233	351	0.248574	0.436886	0.41688	0.588053	0.258279	0	0.859783	0	0.219058	0.100222	0.23571	0.199157	0.172046	0.85947	0	0	0	0	0	0	0	0	0
Unigene0000234	236	0.18485	0	0	0	0.576204	0.270039	0.255749	0	0	0.149059	0.58428	0.592408	0	0	0.148301	0	0.132384	0.125334	0	0	0	0	0
Unigene0000235	837	0.416962	0.18321	0.524463	0.493206	1.13726	0.532981	0.937441	0.135596	0	0.252172	0.0658973	0.751657	0	0.504592	0.0836298	0	0.149307	0.141356	ABC transporter A family member [Medicago truncatula]	0	0	0	0
Unigene0000236	1135	0.730281	0.303992	0.515683	0.727424	0.279556	0.898386	0.531778	0.19999	0.135488	0.371926	0.121489	0.923843	1.0109	0.956851	0.123345	0.0717898	0.0550529	0.0521212	reverse transcriptase family member [Glycine max]	0	GO:0005622//intracellular	GO:0032550;GO:0003676//nucleic acid binding;GO:0003824//catalytic activity	GO:0071704;GO:0044237//cellular metabolic process;GO:0044238//primary metabolic process
Unigene0000237	262	0	0	0.558493	0.315125	0.173008	0.972966	0.921478	0	0	0	0	0	0	0	0	0.310998	0.119246	0.112896	0	0	0	0	0
Unigene0000238	1230	0.461074	0.529858	0.912053	1.30892	0.405373	0.725374	0.490706	0	0	0	0	0	0	0	0.483727	0.629328	0.330206	0.312621	0	0	0	0	0
Unigene0000239	443	0.295427	0.86539	0.66061	0.372743	0.613924	0.575434	0	0.384292	0	0	0.311264	0	0.681582	0.953372	0.316019	0	0	0	0	0	0	0	0
Unigene0000240	856	0.611561	0.895719	1.19658	0.723388	1.5886	1.0423	1.26918	0.729227	0.673679	0.369862	0.708781	0.979964	0.846563	1.05727	0.204434	0.618726	0.474478	0.345546	0	0	0	0	0
Unigene0000241	413	0.528144	0.556951	0.590497	0.899593	0	0	0	0.412207	0.186172	0.511061	0.13355	0.169259	0	0	0	0.197292	0	1.28915	PREDICTED: protein ZINC INDUCED FACILITATOR 10like [Cicer arietinum]	0	GO:0031224//intrinsic to membrane	0	GO:0044763
Unigene0000242	872	0.700397	1.01118	0.391543	0.0946819	0.207927	1.02318	0.207649	0.260308	0.132264	0.0806835	0	0.0801652	0.0692525	0	0.321093	0.093442	0.0716572	0	0	0	0	0	0
Unigene0000243	604	0.433358	0.380829	0.888287	0.888505	0.975603	1.89922	0.499642	1.50323	1.84585	0.698901	0.821862	1.62029	1.39973	2.19763	0.52151	0.87687	0.413808	0.244857	0	0	0	0	0
Unigene0000244	283	0.616604	0.677328	0	0.291741	0.480509	0	0.213275	0.40104	0.271693	0.124304	0.0974489	0.247011	0.213386	0.213197	0.123672	0.14396	0	0.104519	reverse transcriptase family member [Glycine max]	0	GO:0005635//nuclear envelope;GO:0030529//ribonucleoprotein complex	GO:0005198//structural molecule activity;GO:0032550;GO:0017111//nucleoside0triphosphatase activity;GO:0003676//nucleic acid binding;GO:0017016//Ras GTPase binding;GO:0034061	GO:0010468//regulation of gene expression;GO:0044267//cellular protein metabolic process;GO:0016043//cellular component organization;GO:0006950//response to stress;GO:0006606//protein import into nucleus;GO:0006260//DNA replication
Unigene0000245	591	0.369075	0.129735	0.495178	0.1397	0	0	0	0	0	0	0	0	0	0	0	0	0	0	0	0	0	0	0
Unigene0000246	493	0	0	0.19787	0	0	0	0.244855	0	0	0	0	0	0	0	0	0	0	0	0	0	0	0	0
Unigene0000247	213	0.204811	0.539955	0.457981	0.387618	0.638423	0	0.283365	0.532837	0.360982	0.495465	0.129474	0	0	0	0.32863	0	0.293357	0.138867	RNA0directed DNA polymerase (Reverse transcriptase) [Medicago truncatula]	0	GO:0070013;GO:0043234//protein complex;GO:0005739//mitochondrion;GO:0005634//nucleus	GO:0070011;GO:0046872//metal ion binding;GO:0032550;GO:0005083//small GTPase regulator activity;GO:0003677//DNA binding;GO:0016887//ATPase activity;GO:0034061;GO:0008135//translation factor activity, nucleic acid binding	GO:0032011//ARF protein signal transduction;GO:0019219;GO:0016043//cellular component organization;GO:0006351//transcription, DNA0dependent;GO:2000112;GO:0009154;GO:0051603//proteolysis involved in cellular protein catabolic process;GO:0006260//DNA replication;GO:0006950//response to stress;GO:0006412//translation
Unigene0000248	1090	0.520295	0.457228	0.357982	0.795328	0.790122	0.526205	0.885971	0.208246	0.599595	0.161367	0.101204	0.961983	0.55402	0.387471	0.353202	0.11213	0.229303	0.162819	reverse transcriptase family member [Glycine max]	0	GO:0016591//DNA0directed RNA polymerase II, holoenzyme;GO:0043232	GO:0032550;GO:0003676//nucleic acid binding;GO:0046872//metal ion binding;GO:0019787//small conjugating protein ligase activity;GO:0034061	GO:0006366//transcription from RNA polymerase II promoter;GO:0016567//protein ubiquitination;GO:0006260//DNA replication
Unigene0000249	273	0.319595	0.280856	0.357326	0.907282	0.664147	0.233441	0.442174	0.207865	0.140823	0	0.404074	0.256059	0.221202	0.221007	0.256404	0.149233	0	0.216694	0	0	0	0	0
Unigene0000250	1006	0.650468	0.190541	0.484841	0.697597	0.58575	0.253397	0.419978	0	0.305723	0.314714	0.0548271	0.416923	0.540252	0.2399	0.347903	0.283484	0.0931686	0.294023	0	0	0	0	0
Unigene0000251	216	0	0	0.677431	0.191117	0.629556	0	0.558859	0	0	0	0	0	0	0	0	0	0	0	gag/pol polyprotein [Pisum sativum]	0	0	GO:0003676//nucleic acid binding;GO:0016787//hydrolase activity	GO:0006259//DNA metabolic process
Unigene0000252	232	0	0	0	0.177937	1.56304	0.54939	4.94301	0.2446	0.16571	0.303259	0.237742	4.21835	2.08235	4.16102	0.452574	0	0.134666	0.127495	0	0	0	0	0
Unigene0000253	271	1.77074	0.565857	0.179982	0.609318	0.334524	0	0.222719	0.418798	0.283724	0.519233	0.101764	0	0	0	0.64574	0.601339	0.115286	0	R2R30MYB transcription factor [Medicago truncatula]	0	GO:0043231//intracellular membrane0bounded organelle	GO:0003676//nucleic acid binding	0
Unigene0000254	216	0.403932	0	0	0.191117	0	0	0	0	0	0.162861	0	0	0	0	0	0	0	0	R2R30MYB transcription factor [Medicago truncatula]	0	GO:0043231//intracellular membrane0bounded organelle	GO:0003676//nucleic acid binding	0
Unigene0000255	635	0.137401	0.120746	0	0.06501	0.142765	0.401444	0	0.357462	0.423799	0.110797	0.34744	0.440341	0.760796	0.190031	0.0551167	0	0.0984017	0	0	0	0	0	0
Unigene0000256	753	0	0.203648	0.259097	0	0.240786	0.846339	0	0.301445	0.204221	0.0934343	0	0	0	0	0.185918	0.108209	0	0.0392812	0	0	0	0	0
Unigene0000257	237	0	0.161759	0.411603	0.348366	0.382515	0	0.25467	0	0	0.296861	0.116363	0.884862	0.509605	1.27289	0	0.171902	0	0.124805	0	0	0	0	0
Unigene0000258	318	0.137185	0	0.306761	0	0	0	0.379602	0	0.24179	0	0	0	0	0	0	0	0.196494	0	0	0	0	0	0
Unigene0000259	420	0.415473	1.55173	0.464524	0.688022	0.971315	1.82084	0.43112	1.35112	0.732278	0.670057	0.196986	0.665753	0.862688	0.574617	1.08331	0.485008	0.371935	0.633831	0	0	0	0	0
Unigene0000260	341	0.255863	0	0.143035	1.2106	0.132927	0.373779	0.884997	0	0	0.206323	3.39671	0	0	0	0	0	0.183241	1.21438	PREDICTED: late embryogenesis abundant protein 760like [Cicer arietinum]	0	0	0	0
Unigene0000261	243	0.359051	0.315529	0.20072	0.169882	0	0.26226	0.745146	0	0	0	0	0	0.248511	0.248291	0.144029	0	0	0.121723	0	0	0	0	0
Unigene0000262	484	0.630936	1.10892	0.302324	0.341168	0.936529	1.05338	0.374112	0.58623	0.476586	1.09023	0.512815	0.86658	0.249538	0.498635	0.144624	0.3367	0.451855	0.366679	0	0	0	0	0
Unigene0000263	547	1.83431	1.96239	2.14004	0.830155	0.331466	0.699042	1.76546	1.03742	0.281131	0.450176	0.100834	0.383386	1.10399	0.110301	1.02374	0.297921	0.342697	0.0540745	0	0	0	0	0
Unigene0000264	588	0.593533	0.391192	0.912458	0.421238	1.07924	0.758682	0.821181	0.289526	0.392292	0.538439	0.32831	0.118885	0.924309	0.513051	0.178567	0.207861	0.265668	0.50304	0	0	0	0	0
Unigene0000265	372	0.234541	0.309168	0	0.332914	1.46219	0.856576	0.486748	0.152546	1.34349	0.189129	0.148269	0.751657	0.649335	0.486571	1.41125	0.985662	1.00782	2.14685	0	0	0	0	0
Unigene0000266	993	0.351458	1.15821	1.27709	0.831447	1.27813	1.98953	1.09408	0.514324	0.813028	0.637668	0.416587	0.703969	1.03384	0.486081	0.317212	0.492335	0.471942	0.208511	Beta0galactosidase [Medicago truncatula]	0	0	GO:0005488//binding;GO:0003824//catalytic activity	GO:0071704;GO:0044238//primary metabolic process
Unigene0000267	220	0.99147	0	0.443409	0	0.618109	0	0	0	0	0.3198	0	1.27098	0.548984	0	0.318174	0	0	0	Peptidase aspartic, catalytic; Polynucleotidyl transferase, Ribonuclease H fold [Medicago truncatula]	0	0	GO:0046914//transition metal ion binding;GO:0097159;GO:0016740//transferase activity	GO:0006259//DNA metabolic process
Unigene0000268	1253	0.487427	0.45894	0.622825	1.15311	0.542634	0.915505	0.337189	0.498179	0.490913	0.39305	0.418182	0.502104	0.481949	0.529675	0.279322	0.260116	0.47375	0.118032	HAT family dimerization domain containing protein [Medicago truncatula]	0	0	GO:0097159	0
Unigene0000269	291	0	0	0.670447	0	0.623066	1.53301	0	0.195007	0.264224	0.36266	0.0947699	0.480441	0.415039	0	0	0	0	0	U0box domain0containing protein [Medicago truncatula]	0	0	0	0
Unigene0000270	232	0.376075	0	0	0.355874	0.781518	0.54939	0.260159	0	0	0	0	0	0	0	0	0.351213	0	0	0	0	0	0	0
Unigene0000271	365	0	0.210065	1.3363	0.452398	0	1.0476	0	0.621886	0.315983	1.34929	0.60445	0.574554	0.661788	0	0.47944	0.111618	1.02715	0.162075	0	0	0	0	0
Unigene0000272	1027	0.509734	0.410618	0.474927	0.964705	0.617909	0.992861	0.64647	0	0.0374339	0	0.026853	0	0	0.117497	0	0.0793393	0	0.0288011	0	0	0	0	0
Unigene0000273	205	1.70243	1.30906	0.713781	0.805489	0.442225	0	0	0.276815	0.937673	0.3432	0	0.681991	1.47288	0.294316	0.512182	0.198735	0.762013	0.144287	0	0	0	0	0
Unigene0000274	586	0.29778	0.261685	0	0.563568	0.618813	1.08753	0.926981	0.193676	0.721657	0.420215	0.517676	0.596451	0.412206	0.411842	0.179176	0.486664	0.373204	0.252379	0	0	0	0	0
Unigene0000275	232	0	0.165245	0	1.60143	0	0	0	0	0.16571	0	0.237742	0.301311	0	0	0	0	0	0	PREDICTED: uncharacterized protein LOC101488935 [Cicer arietinum]	0	0	0	0
Unigene0000276	216	0.201966	0	1.35486	0	0	0.295043	0.558859	0.262718	0.177984	0	0	0	0	0.279328	0.324066	0.188614	0.144641	0	0	0	0	0	0
Unigene0000277	347	0.251439	0.662884	1.1245	0.594832	0.522513	2.38755	0.173939	1.30829	0.443166	0.912398	0.476854	0.805811	1.74029	1.56488	0.50431	0.70445	0.810325	0.255724	0	0	0	0	0
Unigene0000278	604	0.144453	0	0.323013	0	0.300186	0.316536	0.199857	0.0939522	0	0.0582417	0.136977	0	0	0.0998921	0	0.134903	0	0.0489715	0	0	0	0	0
Unigene0000279	414	0	0.370404	0.235628	0	0.328464	0	0	0.274141	0	0.169942	0	0	0	0	0	0.196815	0	0	0	0	0	0	0
Unigene0000280	866	0.453374	0.177075	1.07012	4.00419	1.2562	1.76617	1.88179	0.196584	0.577113	1.3405	1.62411	1.13009	0.0697323	0.487695	0.242488	0.611581	0.757613	2.93738	ADP0ribosylation factor [Medicago truncatula]	0	GO:0043231//intracellular membrane0bounded organelle	GO:0032550;GO:0060089;GO:0060229//lipase activator activity	GO:0006498//N0terminal protein lipidation;GO:0035556//intracellular signal transduction
Unigene0000281	230	0	0.333363	0	0.358968	1.37955	0.831252	0	0	0	0.764739	0.239809	1.51965	1.05023	1.0493	0.45651	0	0.135837	0	0	0	0	0	0
Unigene0000282	380	1.03322	0.504431	0.770132	0.325905	0	0.670835	0.635335	0	0	0.185147	0.362869	0	0	0.635103	0.276309	0.214425	0.164434	0.544872	0	0	0	0	0
Unigene0000283	243	0.179526	0.315529	0.40144	0.169882	2.05189	1.04904	2.48382	0	0.158208	0	0	0	0	0.248291	0.144029	0.167657	0	0.121723	Subtilisin0like serine protease [Medicago truncatula]	0	0	GO:0005515//protein binding;GO:0004175//endopeptidase activity	GO:0019538//protein metabolic process;GO:0044092//negative regulation of molecular function
Unigene0000284	221	0.59219	0.346939	0.882806	0	0	1.15347	0	0.770323	0.173958	0	0	0	0.27325	0	1.26694	0.184347	0	0.535362	PREDICTED: 10acyl0sn0glycerol030phosphate acyltransferase 20like [Cicer arietinum]	ko00564//Glycerophospholipid metabolism;ko00561//Glycerolipid metabolism	GO:0043231//intracellular membrane0bounded organelle	GO:0016411//acylglycerol O0acyltransferase activity	GO:0046471//phosphatidylglycerol metabolic process
Unigene0000285	549	0.874083	1.11728	1.06612	0.751937	2.72464	1.62515	0.329819	1.4471	1.47056	0.961148	0.954431	3.69257	1.31996	0.219799	0.828758	0.816298	0.569081	0.86204	0	0	0	0	0
Unigene0000286	312	0.139823	0.245749	0.31266	0.793872	0.435846	0.204261	0.386902	0.181882	0.24644	0.2255	0.176782	0	0.193552	0.386762	0.112177	0.130579	0	0	0	0	0	0	0
Unigene0000287	352	0.495735	0.544557	0.138565	0.938212	0.386318	0.181049	0	0	0.218435	0	0.313387	0	0	0	0	0	0	0.0840306	polyprotein0like [Solanum chilense]	ko03018//RNA degradation;ko03008//Ribosome biogenesis in eukaryotes	0	GO:0046872//metal ion binding	0
Unigene0000288	326	0.267636	0.352792	0.8977	0.886409	0.556172	1.36842	1.296	0.348142	0.117928	0.431632	0.592166	1.92987	0.18524	1.11046	0.751514	0.499886	0.575016	0.544394	0	0	0	0	0
Unigene0000289	282	0.309395	0.271892	0	2.19582	0.964426	0.451981	1.07016	0.603693	4.36251	1.1227	1.07574	0	0.642428	1.06977	3.22687	1.44471	0.775524	0.314668	hypothetical protein MTR_1g005160 [Medicago truncatula]	0	0	0	0
Unigene0000290	424	0.617331	0.542502	0.460142	0.292085	1.17596	1.35274	1.42351	0.53535	0	0.912637	0	1.64868	1.85152	0.853794	0.247635	0.192173	0.14737	0.348806	Histone deacetylase [Medicago truncatula]	0	0	GO:0005488//binding	GO:0044238//primary metabolic process;GO:0044260;GO:0051704;GO:0044699
Unigene0000291	259	0	0	0.376641	0.159387	0.350023	1.47635	0.466076	0	0.148435	0.407467	0.212958	0	0	0.232953	0.135132	0	0	0.342611	0	0	0	0	0
Unigene0000292	702	0.435004	0.491497	1.11168	0.88208	1.9371	2.26956	1.03174	0.161673	0.219058	0.200444	0.432134	0.597471	1.20432	0.515682	0.249281	0.348211	0.44505	0.716295	0	0	0	0	0
Unigene0000293	265	0	0	0.736227	0.311557	0	0	0	0	0	0	0	0	0	0	0	0	0.117896	0	0	0	0	0	0
Unigene0000294	477	0	0	0.511268	2.16359	0	0	0	0	0	1.47497	1.44539	0	0	0	0	0	0	0.6201	0	0	0	0	0
Unigene0000295	396	0.33049	0.48405	1.23169	0.938212	0.343394	1.12653	0.304832	0	0.0970824	0	0.0696415	0	0.152495	0.152361	0.265145	0.308642	0.0788953	0.149388	0	0	0	0	0
Unigene0000296	265	0.329243	0.578668	0.920283	0.311557	0.513147	0.961952	0.911046	0.21414	0.580296	0.530989	0.312204	0	0.91152	0	0.528288	0.307477	1.53265	0.334854	0	0	0	0	0
Unigene0000297	354	0	0	1.65339	0.233228	0.256091	0.720105	0.340999	1.28242	3.25802	2.08683	0.623232	0	0.682352	1.3635	0	1.84139	0.529534	0.501335	PREDICTED: uncharacterized protein LOC101513060 [Cicer arietinum]	0	0	0	0
Unigene0000298	224	0.779012	0.171146	0.870982	0	0	0.853517	0	0	0.343255	0	0	0	0	0.269352	0.624984	0.181878	0.139476	0.396144	0	0	0	0	0
Unigene0000299	333	0.786031	0.460502	0.439415	0.247936	0.408361	0.765517	0.362503	0.340823	0.346348	0.10564	0.414085	0.629767	0.362692	0.543557	0.105102	0	0.0938214	0	0	0	0	0	0
Unigene0000300	516	0	0.148592	2.26861	0.400013	0	0	0	0.21995	0.14901	1.43166	0.106892	0	0	0	0	0.0789549	0.666023	0.0573232	PREDICTED: phosphoribosylaminoimidazole0succinocarboxamide synthase, chloroplastic0like [Cicer arietinum]	ko00230//Purine metabolism	0	0	0
Unigene0000301	416	0.209734	0.184311	0.586238	0.198468	0.544808	0.765977	0.435265	0.136411	0.36966	0.591938	0.265173	0.336077	0.72582	0.870213	0	0.587606	0.525716	0.142206	0	0	0	0	0
Unigene0000302	243	0	0	0	0.169882	0.37307	0	1.49029	0	0	0	0	0	0	0	0	0	0	0	0	0	0	0	0
Unigene0000303	390	0.559291	0.294898	0.250128	0.635097	0.232451	0.653634	0.154761	0.436516	0.0985759	0.2706	0.353564	1.61317	0.309683	0	0	0.104463	0.320436	0.303372	0	0	0	0	0
Unigene0000304	262	0.666026	0.292647	0.744657	0	1.03805	0.486483	0	0	0.146735	0	0.315779	0	1.15245	0	0.133584	0	0.119246	0.338688	0	0	0	0	0
Unigene0000305	419	0	0	0	0.492617	0	1.06469	0.576198	0	0.183506	0	0.131637	0.333671	0	1.00798	0.16706	0.2917	0	0.0705937	0	0	0	0	0
Unigene0000306	487	0	0	0.701078	2.96683	0	0	0	0.116524	0	0	0	0.28708	0.124	0.123891	0	0	0	0	0	0	0	0	0
Unigene0000307	470	0	0	0.62266	0.702661	0	0	0	0	0	0.149694	0.586767	0	0.256971	0	0	0	0.332367	0.881069	PREDICTED: amino acid permease 30like isoform X1 [Cicer arietinum]	0	GO:0031224//intrinsic to membrane	0	0
Unigene0000308	418	0.208731	0.0917148	0.233373	0.197518	0	0	0	0.271517	0	0	0	0	0	0	0	0	0	0.141525	PREDICTED: amino acid permease 30like isoform X1 [Cicer arietinum]	0	GO:0031224//intrinsic to membrane	0	0
Unigene0000309	290	0	0.528783	1.17733	0.569398	0.312607	1.53829	0	0.587039	0	0.849124	0.190193	2.16944	1.24941	0	0.36206	0.28097	0	0.305987	0	0	0	0	0
Unigene0000310	312	0.838937	0.614372	0.31266	0.793872	0	0.817042	0	0.545645	0.739319	0.33825	0.265173	0	0	0	1.00959	0.391738	0.400545	0	0	0	0	0	0
Unigene0000311	338	0.129067	0.567112	0.28861	0.732805	1.20696	0.188548	0.892852	0.335782	0.227483	0	0.326367	0.620451	0.357327	0	0	0	0	0	0	0	0	0	0
Unigene0000312	803	0.38029	0.334194	0.850374	0.411271	0.733829	0.634912	0	0.282676	0.526639	0.876164	0.309094	0.522322	0.22561	0.45082	0.348683	0.456621	0.194536	0.147341	0	0	0	0	0
Unigene0000313	209	0.834922	0.366859	0.933493	0.395037	0.867522	0.60985	0.288788	0.271517	0.183946	0.168316	0.263905	1.00341	0.577877	0	0.669839	0	0.149486	0	0	0	0	0	0
Unigene0000314	577	0.453636	0	0.845321	0.572358	0.628465	0.883595	0.627627	0.393394	0.666284	0.914506	0.238978	0.605755	0.418636	0.418266	0.303285	0.353039	0.433172	0.717682	0	0	0	0	0
Unigene0000315	378	0.230819	1.11562	0.516138	0.655259	1.31907	0.168596	2.23544	0.300249	0.203411	0.27919	0.291831	0.554794	1.59757	0.319232	0.18518	0.215559	0	0.234752	0	0	0	0	0
Unigene0000316	391	0.334716	0	0	0	1.85486	1.7929	0.30873	0	0	0	0	0.178783	0	0	0	0	0	0	0	0	0	0	0
Unigene0000317	668	0.195919	0.286952	1.16826	0.37079	0.882132	0.858628	0.542127	0.594655	0.345311	0.31597	0.247707	0.627881	0.361606	0.903216	0.261969	0.67088	0.0935405	0.354237	0	0	0	0	0
Unigene0000318	781	0.614432	1.37443	0.93678	1.11	1.04469	1.71359	1.70019	0.799255	0.590698	0.675634	0.459045	0.716047	0.618573	1.23605	0.537758	0.625978	0.520042	0.568094	0	0	0	0	0
Unigene0000319	994	0.789984	1.38845	1.37394	0.373775	0.501618	1.15405	0.364327	1.02761	0.541473	0.283123	0.388423	0.632934	0.66828	0.667689	0.387314	0.942693	0.440036	0.476117	0	0	0	0	0
Unigene0000320	718	0.243035	0.533939	0.475522	0.632444	1.07323	1.42015	0.672499	0.31614	0.374808	0.244972	0.460914	0.876235	1.09338	0.924349	0.341217	0.0567419	0.435133	0.535549	0	0	0	0	0
Unigene0000321	257	0.339492	0	0	0.321255	0	0.495948	0	0.220806	0.29918	0	0.107308	0.544001	0.469947	0.234766	0	0.158524	0.243133	0	0	0	0	0	0
Unigene0000322	418	0.834922	0.275144	0.233373	0.691314	0.325321	0.304925	1.15515	0.271517	0.827755	0.757421	0.461833	1.00341	1.73363	0.288683	0.33492	0.877192	0.0747429	0.424576	0	0	0	0	0
Unigene0000323	259	0.168435	0.592074	0.376641	0.318775	0.525035	0.246059	0	0.876403	0.593739	0.407467	0.638873	1.6194	2.33159	0.931812	0.81079	1.1011	0.241255	0.799426	0	0	0	0	0
Unigene0000324	308	0	0	0	0	0.294338	0.206913	2.93945	0	0.37446	0.456857	0.179078	0.453923	0.196066	0	0	0	0	0.19207	Heat shock protein [Medicago truncatula]	ko03040//Spliceosome;ko04141//Protein processing in endoplasmic reticulum;ko04144//Endocytosis;ko04010//MAPK signaling pathway;ko05145//Toxoplasmosis;ko04612//Antigen processing and presentation;ko05162//Measles	0	GO:0032550	GO:0050896//response to stimulus
Unigene0000325	420	1.24642	1.36917	0.580655	1.47433	0.647543	0.455209	0	2.97247	1.8307	0.670057	0.525296	0.332877	0	0.718271	1.08331	2.32804	0.595096	0.422554	0	0	0	0	0
Unigene0000326	769	0.964395	0.299117	0.951398	1.39573	1.65044	0.745856	1.8837	0.147587	0.249965	0.320216	0.215173	0.545416	0.392641	0.549211	0	0.370852	0.365647	0.0769279	polyprotein [Arabidopsis thaliana]	0	0	GO:0003676//nucleic acid binding	GO:0006259//DNA metabolic process
Unigene0000327	437	0.798622	0.0877272	1.11613	0.850187	0.726078	0.291667	0.138116	0.519424	0.703792	0.563492	0.126215	1.11975	2.07282	1.38066	1.36152	2.05102	0.714932	0.812231	0	0	0	0	0
Unigene0000328	397	0	0	0.982872	1.2478	0.228353	0.642109	0.456097	0	0	0	0	0	0	0	0	0	0	0	0	0	0	0	0
Unigene0000329	245	0	0	0	0	1.29509	2.34108	0.739063	0.231621	0.156917	0.430751	0.112563	0.855968	0.246482	3.94023	0.142853	0.166289	0	0.241459	0	0	0	0	0
Unigene0000330	546	0.798987	2.0362	1.25064	0.453641	0.249055	0.466881	0	0.311797	0.49288	0.193286	0	0.256059	0.221202	0.33151	0.320504	0.596934	0.114442	0	0	0	0	0	0
Unigene0000331	354	0.616168	0	0	0	0.128045	0	0	0	0	0	0	0	0	0	0	0	0	0	0	0	0	0	0
Unigene0000332	459	0.570258	0.167045	0.425055	0.269813	0	0.138844	0.262993	0	0	0	0	0	0	0	0	0	0	0	0	0	0	0	0
Unigene0000333	418	0.417461	0.18343	0.116687	0.592555	0.759082	0	0.288788	0	0	0	0	0	0	0.577367	0.0837299	0	0.149486	0	TMV resistance protein N [Medicago truncatula]	0	0	0	0
Unigene0000334	563	0.0774861	0.680938	0.519805	0.146648	1.28819	0.679175	1.07206	0.302382	0.0682853	0.374899	0.342888	0.372491	0.536307	0.643	0.248661	0.361818	0.499437	0.367764	TMV resistance protein N [Medicago truncatula]	0	0	0	0
Unigene0000335	516	0.253632	0.0742961	0.567151	1.04003	0.52707	0.247013	1.05273	0.21995	0.521535	0.204523	0.0534458	0.812838	0.585157	1.98777	0.406966	0.394774	0.302738	0.17197	0	0	0	0	0
Unigene0000336	436	0	0	0.223739	3.1245	0	0	0	0	0	0.887518	0.0632524	0	0	0	0.0802731	0.280326	0.286629	0.407047	0	0	0	0	0
Unigene0000337	635	0	0.120746	0.076811	2.27535	0	0.200722	0	0.178731	0.181628	0.221594	2.30179	0	0	0.190031	0	0	0	1.30426	PREDICTED: actin0depolymerizing factor 70like [Glycine max]	ko04810//Regulation of actin cytoskeleton;ko04666//Fc gamma R0mediated phagocytosis;ko04360//Axon guidance	GO:0043231//intracellular membrane0bounded organelle;GO:0005576//extracellular region;GO:0015629//actin cytoskeleton	GO:0046914//transition metal ion binding;GO:0008092//cytoskeletal protein binding;GO:0097159	GO:0008154//actin polymerization or depolymerization
Unigene0000338	590	0	0	0	4.96775	0	0	0	0	0	0.119247	4.48727	0	0	0	0	0.0690521	0.211814	4.36161	PREDICTED: actin0depolymerizing factor 70like [Glycine max]	ko04810//Regulation of actin cytoskeleton;ko04666//Fc gamma R0mediated phagocytosis;ko04360//Axon guidance	GO:0005856//cytoskeleton	GO:0046914//transition metal ion binding;GO:0008092//cytoskeletal protein binding;GO:0097159	GO:0008154//actin polymerization or depolymerization
Unigene0000339	866	0	0	0	0.0953379	2.14602	0.883085	1.32423	0	0	0	0	0	0	0	0	0	0	0	0	0	0	0	0
Unigene0000340	321	0	0	0	0.128602	0.988462	0.595601	0.940137	0	0	0	0	3.26655	2.06938	2.44347	0	0	0	0	UDP0glucuronosyltransferase 2A1 [Medicago truncatula]	0	0	GO:0016757//transferase activity, transferring glycosyl groups	0
Unigene0000341	338	0.258134	0	0.144305	0.366402	0.134107	0.565645	1.24999	0.335782	0	0.312231	0	0.206817	0	0.892527	0.621286	0.723208	0.462168	0.175022	Histone deacetylase [Medicago truncatula]	0	0	0	GO:0009987//cellular process
Unigene0000342	206	0	0.186101	0.473544	2.00395	0.880156	0.928096	2.92994	0.550943	1.67962	0.170767	0.66937	1.01802	1.46573	1.17155	0	0	0	0	0	0	0	0	0
Unigene0000343	461	0.378522	0.16632	0.423211	0.179095	0.294976	2.3501	0.392777	0	0.250182	0.228924	0.239289	0.303272	0.392982	0.261756	0.607359	0.441873	0.135542	0.192487	0	0	0	0	0
Unigene0000344	572	0.152534	0.268089	0.341084	0.288681	0.713203	0.22283	0.738632	0.297625	0	0.4305	0	0.97768	0.739016	0.10548	0.305936	0.42735	0.491578	0.206844	0	0	0	0	0
Unigene0000345	263	0.165873	0.145767	0.370913	0.627853	0.17235	1.21158	0	0.215768	0.146177	0	0.419438	0.53159	0.459226	0	0.399229	1.08435	0.237586	0.562334	0	0	0	0	0
Unigene0000346	395	0.441769	0.485276	1.35829	0.940587	0	0	0.305604	1.43664	0.291984	0.979641	0.349089	0	0.305763	0	0.354421	0.103141	0.31638	0.299532	0	0	0	0	0
Unigene0000347	225	1.16333	1.02231	0.433556	0	0.402916	0	0	0	0	0.312693	0	0	0	0	1.08886	0.36214	0.694279	0.788767	0	0	0	0	0
Unigene0000348	309	0.847082	1.24067	0.315696	0.534386	0.586771	0	0.585988	3.30566	1.61741	1.47998	0.267748	0.678681	0.781724	0	0	0.131847	0.909977	0.574345	0	0	0	0	0
Unigene0000349	253	2.06916	1.0607	0.771146	0.326335	0.537486	0	0	0.448594	0.30391	0.695217	0.54502	0.828902	0.238689	0.238477	1.10669	0.805152	0.493953	0.701473	0	0	0	0	0
Unigene0000350	567	0.538577	0.270454	0.602161	0.728066	1.35904	0.899179	0.319348	0.200166	0.406821	0.186127	0	0.123288	0.21301	0.106411	0.678995	0.0718531	0.0551015	0.156501	0	0	0	0	0
Unigene0000351	597	0.584586	0.385294	1.0621	0.69148	0	0.320248	0.2022	0.665376	0.321982	0.76602	0.508138	0	0	0.404253	0.527624	1.50133	1.25598	0.594548	Receptor protein kinase0like protein [Medicago truncatula]	0	0	GO:0097159;GO:0016301//kinase activity;GO:1901363	GO:0044238//primary metabolic process;GO:0044260;GO:0016310//phosphorylation
Unigene0000352	678	1.9303	1.47014	1.22297	0.852417	1.40397	1.03396	1.33533	1.42286	1.75779	1.91974	1.42364	0.61862	0.890681	1.33484	1.39377	0.841254	1.05985	1.35242	0	0	0	0	0
Unigene0000353	313	0.418128	0.122482	0.155831	0.527557	0.434454	0.610824	0	0.362601	0.491305	0.337169	0.528652	1.56335	0.771734	0.771052	0.111818	0.260324	0.598898	0.850507	hypothetical protein MTR_2g083240 [Medicago truncatula]	0	0	0	0
Unigene0000354	734	0.118868	0.10446	0.265804	0.224966	1.72913	2.51791	1.6446	0	0.104754	0.0479264	0.0751445	1.42856	3.04409	1.3974	0	0.166515	0	0.040298	0	0	0	0	0
Unigene0000355	732	0.476773	0.314236	0.999488	0.845929	1.23847	0.783557	0.742092	0.310093	0.31512	0.865033	0.188375	0.572984	0.164995	0.164849	0.573756	0.278284	0.554854	0.0808163	0	0	0	0	0
Unigene0000356	316	0	0.242638	0.771757	0.391911	0.286886	1.81507	0.573007	0	0	0.222646	0.174544	0.442431	2.86653	0.954665	0	0	0.494344	0.0936037	0	0	0	0	0
Unigene0000357	250	0.174499	0	0.1951	0.495376	0	0	0.482854	0	0	0	0	1.11847	0.241553	0.724018	0	0	0	0	0	0	0	0	0
Unigene0000358	281	0.310496	0.13643	0.694306	0.440726	0.322619	0.453589	0	0	0	0	0	0	0	0	0	0	0	0	0	0	0	0	0
Unigene0000359	1195	0.584096	0.866187	1.10203	0.552721	0.417245	0.42664	0.606093	0.142461	0.225199	0.235501	0.0230778	0.350983	0.353738	0.100979	0.410031	0.340926	0.0522888	0.198017	0	0	0	0	0
Unigene0000360	278	0.94154	0.137902	1.0527	1.03946	1.14135	0.229242	0.434221	0.408253	0	0.253079	0.198403	0.251454	0.651671	0.868127	0.62948	0.146549	0.449533	0.425594	0	0	0	0	0
Unigene0000361	345	0.252897	0.111121	0.141377	0.119656	0.394157	0.923613	0.874736	0	0	0	0	0.202621	0	0	0.101447	0	0	0	0	0	0	0	0
Unigene0000362	715	1.58635	1.5013	0.682168	1.90529	0.253583	0.356527	0.590906	0	0	0.1968	0.192853	0.195536	0	0.168769	0.342648	0	0.0873917	0.165476	F0box [Medicago truncatula]	0	0	0	0
Unigene0000363	699	0.12482	0.383916	0.837339	1.71267	0.64847	1.82344	0.518084	0.0811833	0.0549994	0.150979	0.55235	1.00006	0	0	0.0500702	0	0.536353	0.380842	F0box protein [Medicago truncatula]	0	0	0	0
Unigene0000364	333	0	0	0	0	0	0	0	0	0	0.10564	0	0	0	0	0	0	0	0	reverse transcriptase family member [Glycine max]	0	0	0	0
Unigene0000365	414	0.210747	0.185202	0.235628	0.29914	0.109488	0.153935	0.145789	0	0	0.169942	0	0	0	0.145736	0.338155	0	0.30186	0.0714463	Embryonic flower [Medicago truncatula]	0	GO:0043232	GO:0032550;GO:0003676//nucleic acid binding;GO:0016773//phosphotransferase activity, alcohol group as acceptor;GO:0016301//kinase activity	GO:0044267//cellular protein metabolic process;GO:0006259//DNA metabolic process;GO:0034645//cellular macromolecule biosynthetic process;GO:0051276//chromosome organization;GO:0065007//biological regulation;GO:0006796//phosphate0containing compound metabolic process;GO:0006974//response to DNA damage stimulus
Unigene0000366	228	0	0	3.63673	0.181058	0	0	0	0	0.168617	0.462868	0	0	0	0	0	0	0	0.389194	0	0	0	0	0
Unigene0000367	593	0.147132	0.258596	1.97403	0.904987	0	0.214939	0	4.30627	5.38095	5.04238	0.46506	0	0.305505	0	2.77396	6.52676	3.79336	0.249399	GDSL esterase/lipase [Medicago truncatula]	0	0	GO:0016787//hydrolase activity	GO:0044238//primary metabolic process
Unigene0000368	385	0	0	1.01351	0.75057	0.353205	0.331061	0.313542	0	0	0.182743	0.0716312	0	0	0	0	0	0	0.153656	PREDICTED: transcription factor NAI10like [Cicer arietinum]	0	0	GO:0016491//oxidoreductase activity	0
Unigene0000369	398	0	0	0.245101	0	0	0	0	0	0	0	0	0	0	0	0	0	0	0	PREDICTED: transcription factor NAI10like [Cicer arietinum]	0	0	0	0
Unigene0000370	328	0.133002	0.701283	0	0.881004	0.27639	0.58289	0.184015	0.346019	0.117209	0.32175	0.0840794	0.426244	0.368221	0.919738	0.213409	0.496838	0.190503	0.360717	0	0	0	0	0
Unigene0000371	429	1.32196	0.893631	1.02325	0.577361	0.211319	0	0	0.925944	0.627301	0.656	0.257138	0	0.422295	0.281281	0.978995	1.23457	0.218479	0.206844	0	0	0	0	0
Unigene0000372	625	0.558396	0	0.3902	0.2642	0.435149	0.611801	0.579425	0.272386	0	0.168854	0.220624	0.223693	0.0966211	0.0965357	0.223994	0.260741	0.0999761	0.23663	Ty3/gypsy retrotransposon protein [Beta vulgaris subsp. vulgaris]	0	0	0	0
Unigene0000373	634	0.619278	0.241872	0.69239	0.651125	0.571962	1.20623	0.8568	0.358026	0.242553	0.0554858	0.304489	0.661553	0.571497	0.475827	0.331222	0.321299	0.0985569	0.0933084	0	0	0	0	0
Unigene0000374	433	0.906749	1.4166	0.450577	0.953379	1.15152	1.32463	0.278784	0.655278	0.443933	0.406212	0.445834	0.807207	0.976253	0.696707	0.242488	0.752715	0.649383	0.341556	0	0	0	0	0
Unigene0000375	876	0.746998	0.568925	0.222717	0.659747	0.413955	1.38226	0.689004	0.388679	0.351092	0.200788	0.188891	0.478795	0.137873	0.275501	0.47944	0.465077	0.28532	0.303891	0	0	0	0	0
Unigene0000376	404	0.215964	0.94893	1.2073	0.613089	1.12198	0.473237	0	0.983242	0	0.348297	0.136525	0.86515	0	0.896061	0.259894	0.30253	0.231999	0.14643	0	0	0	0	0
Unigene0000377	679	0.256994	0.395225	0.862003	0.243189	0.934598	0.563145	0.533344	0.334298	0.396336	0.36266	0.243694	0.205903	0.444685	0.622008	0.30927	0.300005	0.138038	0.174249	0	0	0	0	0
Unigene0000378	557	0.156642	0.7571	1.13838	1.40816	0.162758	0.22883	0	0.40752	0	0	0.0990234	0.125501	0.325251	0	0.12567	0	0.112181	0.212415	0	0	0	0	0
Unigene0000379	534	0.816942	0.143583	0.822051	0.850364	0.679072	0.477373	1.13028	0	0.287975	0.263506	0.413154	0.39272	0.904692	0.677919	0.45879	0.305174	0.585066	0.664691	0	0	0	0	0
Unigene0000380	239	0.18253	0.160405	1.22448	0	0	0.26665	0	0.237436	0	0	0	0	0	0	0	0	0.130722	0	0	0	0	0	0
Unigene0000381	773	0.112871	0.297569	0.694082	0.640849	0.938226	0.659553	0.468487	0.587292	0.149203	0.455084	0.642179	0.81389	0.624975	0.936633	0.362216	0.474342	0.606259	0.306119	0	0	0	0	0
Unigene0000382	1291	1.14891	0.742385	1.32233	0.671501	0.842659	0.789829	0.654528	0.747251	0.952926	0.980951	0.7263	1.67856	1.30974	1.63572	0.704862	0.978282	0.774408	1.00811	0	0	0	0	0
Unigene0000383	464	0.75215	0.578357	0.630711	0.978652	1.07459	1.23613	1.43087	0.366899	0.745693	0.303259	0.0594354	1.20524	1.04118	1.69041	0.603433	1.14144	0.740664	0.637473	0	0	0	0	0
Unigene0000384	523	0.583887	0.586414	0.746081	0.236795	0.433346	0.974827	0.23081	0.542515	0.441047	0.67262	0.316383	1.60392	1.15465	0.922903	0.602279	0.467389	0.41816	0.735227	0	0	0	0	0
Unigene0000385	284	0.460824	0.269977	0	0.290714	1.11724	0.673197	0.425048	0.199814	0.406105	0.619331	0.291317	0.738424	0.212634	1.48713	0.369709	0.43036	0.660054	0.104151	hypothetical protein MTR_2g081060 [Medicago truncatula]	0	0	0	0
Unigene0000386	222	0.196508	0	0	0	0.20418	0	0	0	0	0	0.124225	0	0	0.271778	0	0	0.140732	0	0	0	0	0	0
Unigene0000387	334	0.130613	0.459123	0.292066	0.123597	1.49284	0.572419	0.180709	0.339803	0.345311	0.31597	0.412845	0.418587	0.361606	0	0.419151	0.243956	0	0.354237	0	0	0	0	0
Unigene0000388	244	0	0	0.199898	1.1843	0	0.261186	0	0	0	0	0	0	0	0.247274	0	0	0	0	0	0	0	0	0
Unigene0000389	986	0	0	0.0989351	0	0	0	0.244855	0	0	0	0.0559392	0	0	0	0.035496	0	0	0.119995	0	0	0	0	0
Unigene0000390	1092	0.0798987	0	0	0.22682	0.415092	1.1672	0.331631	0	0	0.0644286	0.0505092	0.448103	0.884809	0.221007	0	0	0.171662	0.162521	0	0	0	0	0
Unigene0000391	349	0	0.109848	0.279513	1.06456	0.649399	0.365211	0.172942	1.13819	0.440626	0.806373	0.632161	0.400597	0.86516	0	0.902555	0.466942	0	0.423764	0	0	0	0	0
Unigene0000392	294	0.593533	0.130397	0.331803	0.561651	1.38759	0.216766	0	0.193017	0	0.598265	0.0938028	0.713307	0.410804	0.20522	0.595223	0	0.956404	0.100608	Pentatricopeptide repeat0containing protein [Medicago truncatula]	0	GO:0016020//membrane	GO:0005488//binding	0
Unigene0000393	1429	1.16007	1.01945	0.819174	1.06887	0.729562	1.15953	1.09816	0.953066	1.07613	0.689282	0.926344	0.782691	0.633886	0.675547	0.416364	0.684239	1.02757	0.910753	0	0	0	0	0
Unigene0000394	359	0.243035	0	0.135864	0.22998	0.126262	0.710076	0.672499	0	0	0	0	0	0	0	0	0	0	0	0	0	0	0	0
Unigene0000395	643	0.678456	0.476974	0.303422	0.128402	0.281978	0.792899	0	0	0	0	0	0	0	0	0	0	0	0	0	0	0	0	0
Unigene0000396	217	0	0.706669	0.22477	0.760946	1.04442	0.587367	0.556284	0	0	0	0	0	0	0	0	0.187745	0	0.136308	0	0	0	0	0
Unigene0000397	215	0	0	0.226861	0.192006	0	0.296415	0.561458	0	0	0	0.25654	0	0	0.280627	0	0	0	0	0	0	0	0	0
Unigene0000398	297	0	0	0.656903	0.694972	0.457859	0.858307	0	0	0.388329	0.236889	0.0928553	0.470735	0	0	0	0.274348	0.210387	0	0	0	0	0	0
Unigene0000399	715	1.15926	0.482561	0.682168	0.461889	0.633958	0.980451	0.33766	0.0793666	0.322612	0.3444	0.231424	0.293304	0.84459	0.0843843	0.195799	0.5698	0.131088	0.165476	0	0	0	0	0
Unigene0000400	242	0.360535	0.792082	0.403099	0	2.24767	1.31672	0.748225	0.468984	0	0.145364	0	0.86658	0.249538	0.498635	0	1.0101	0.387304	0.244453	0	0	0	0	0
Unigene0000401	585	0.223716	0	1.41739	0.77623	1.39471	2.06984	0.825392	0.0970036	0	0.120267	0.329994	0.119494	0	0.103136	0.538448	0.487496	1.17493	1.11236	0	0	0	0	0
Unigene0000402	1417	0.55416	0.865757	0.447477	0.436994	0.991651	1.21432	1.10746	0.720852	0.922454	0.794422	0.544943	0.19733	0.894956	0.510951	0.148197	0	0.13229	0.104371	0	0	0	0	0
Unigene0000403	1117	0.234331	0.446176	1.44098	1.33046	0.568122	1.02697	0	0	0	0	0	0	0	0	0	0	0	0	RNA0directed DNA polymerase (Reverse transcriptase); Polynucleotidyl transferase, Ribonuclease H fold [Medicago truncatula]	0	0	0	0
Unigene0000404	430	0.101453	0	0	0.0960031	0	0	0	0	0	0	0	0	0	0	0	0	0	0	Nucleic acid0binding, OB0fold [Medicago truncatula]	0	0	0	0
Unigene0000405	489	0	0	0	0	1.48313	1.56391	3.20915	0	0	0	0	0	0	0	0	0	0	0	0	0	0	0	0
Unigene0000406	930	0.797441	0.865669	0.83914	0.798993	1.70589	1.37052	1.0384	0.488147	0.702751	0.226955	0.385499	0.150331	0.649335	0.84339	0.940836	0.744723	0.671882	0.731518	0	0	0	0	0
Unigene0000407	440	0	0	0.665114	0.375285	1.75131	0.289679	0.823047	0	0.0873741	0	0.0626773	0.317746	0.274492	0.137125	0	0.0925925	0	0.268898	PREDICTED: 60S ribosomal protein L13010like [Cicer arietinum]	ko03010//Ribosome	GO:0015934//large ribosomal subunit	GO:0005198//structural molecule activity	GO:0010467//gene expression;GO:0022613//ribonucleoprotein complex biogenesis
Unigene0000408	369	0.827569	2.07787	0.660908	1.23061	0.737041	1.20896	0.490706	0.461359	0	0.190667	0.52316	0.568326	0.818268	0.817545	0.474242	0.441634	0.338672	0.240478	0	0	0	0	0
Unigene0000409	408	0.534616	1.12755	0.35864	0.607078	1.22208	1.71819	1.47933	0.417258	0.659589	0.862206	0.270373	0.856668	0.444031	0.887277	0.343128	0.299564	0.382874	0.797467	0	0	0	0	0
Unigene0000410	201	0.217038	0	0	0	0	0.951183	0.300283	0	0	0.175015	0	0	0	0	0.34825	0.20269	0.310871	0.147158	0	0	0	0	0
Unigene0000411	238	0.733188	0	0	0.346902	2.4759	0.80331	0	0	0	0.591227	0.463496	0.293715	1.01493	0	0.147055	0	0	0	0	0	0	0	0
Unigene0000412	330	0.264392	0.348516	0.739015	0.125095	0.412073	1.15871	0.914497	0.343922	0.465995	0.2132	0.250709	0.635492	0.365989	0	0.106058	0.246913	0.189349	0	0	0	0	0	0
Unigene0000413	392	0.667725	0.48899	0.746556	1.0531	0.925062	0.325149	1.23177	0.868578	1.0788	0.807658	0.562817	1.24829	0.770258	1.69307	0.446417	0.727513	1.1158	0.528192	0	0	0	0	0
Unigene0000414	397	0.329658	0.193132	0.982872	0.519916	1.02759	0.963163	0.304064	0.14294	0.0968378	0	0.0694661	0	0.152111	0.303954	0.176318	0.410486	0.23609	0.149011	0	0	0	0	0
Unigene0000415	485	0.809531	0.31618	1.81021	0	0.560759	0	0	0	0.0792672	0.290128	0.113724	0.288264	0.124512	0.248803	0.0721631	0.504009	0	0.121974	Bifunctional protein aas [Medicago truncatula]	0	0	GO:0004601//peroxidase activity;GO:0046906//tetrapyrrole binding	GO:0044710;GO:0006950//response to stress
Unigene0000416	470	0.835367	0.489406	0.93399	0.263498	0.38577	0.271188	0.642093	0.482954	0.899767	0	0.293383	0	0.128486	0.256744	0	0.780141	0.265894	0.818136	Bifunctional protein aas [Medicago truncatula]	0	0	GO:0004601//peroxidase activity;GO:0046906//tetrapyrrole binding	GO:0044710;GO:0006950//response to stress
Unigene0000417	458	0.762003	0.837048	0.638974	0.540803	1.78145	1.53062	1.05427	0.495608	0.335761	0.921694	0.240856	0.763145	0.922964	0.658677	1.06984	0.711628	1.09144	0.645824	0	0	0	0	0
Unigene0000418	876	0.248999	0.656452	0.389755	0.801122	1.03489	0.218251	0.895706	0.453459	0.0877731	0.120473	0.0944453	0.877791	0.689363	0.413252	0.47944	0.372061	0.14266	0.168829	0	0	0	0	0
Unigene0000419	512	0.511227	0	1.23843	0.483766	0.885313	0.373414	0.471537	0	0.0750871	0.068707	0	0.273063	0.589728	0.82489	0.136715	0.0795717	0	0.115542	0	0	0	0	0
Unigene0000420	904	0.579089	0.763343	0.917229	1.09596	1.75496	1.76243	1.06826	0	0.0425272	0.0389137	0	0.30931	0.0668011	0.066742	0.503305	0.405604	0.138241	0.0654397	0	0	0	0	0
Unigene0000421	363	0.841248	0.844888	0.268733	0.682336	0.124871	0.877814	0.166272	0	0	0.290727	0.0759725	0	0.332717	0	0.0964162	0.224467	0	0.162968	0	0	0	0	0
Unigene0000422	655	0	0	0	0.756299	0.207609	0	0.184296	0	0	0	0.126312	0	0	0	0	0	0	0.451584	PREDICTED: homeobox protein 50like [Cicer arietinum]	0	0	0	0
Unigene0000423	753	0	0	0.323871	1.04163	0	0	0	0	0.102111	0.32702	0.512739	0	0.160394	0.160252	0	0	0.290435	0.942749	PREDICTED: homeobox protein 50like [Cicer arietinum]	0	0	0	0
Unigene0000424	264	1.32196	1.30694	0	0.312737	1.03018	1.44839	0.685873	1.07476	0.873741	1.066	1.04462	0.264788	0.914973	0.228541	0.397717	0.617284	0.473372	0.336122	0	0	0	0	0
Unigene0000425	678	0.128686	0.0565439	0.287758	0.243548	0	0.093996	0	0	0.113406	0	0.0813511	0.206207	0	0.177979	0	0	0.0460804	0	retroelement pol polyprotein0like [Arabidopsis thaliana]	0	0	GO:0046872//metal ion binding	GO:0008152//metabolic process
Unigene0000426	912	0.430507	0.294252	0.695258	1.49373	1.34195	1.39757	1.65452	0.995563	0.800929	1.04145	0.755977	1.68628	1.45673	3.96939	0.844276	0.848765	1.09623	1.07028	0	0	0	0	0
Unigene0000427	308	0.99147	0.74682	0.475081	0	0	0	0	0	0	0.228429	0	0	0	0	0	0	0	0.288105	PREDICTED: cationic amino acid transporter 10like [Cicer arietinum]	0	0	0	0
Unigene0000428	245	0	0	1.19449	1.17947	0	0	0.246354	0	0	0.143584	0.112563	0	0	0	0	0	0	0	0	0	0	0	0
Unigene0000429	244	0	0	0.999488	0.676743	0	0.522371	0.742092	0	0.945359	0.288344	0	0	0.494985	0.494548	0.286878	0.33394	0	0.242449	Histone deacetylase [Medicago truncatula]	0	GO:0043231//intracellular membrane0bounded organelle	GO:0016811//hydrolase activity, acting on carbon0nitrogen (but not peptide) bonds, in linear amides;GO:0046872//metal ion binding;GO:0097159	GO:0006259//DNA metabolic process;GO:0009292//genetic transfer;GO:0009611//response to wounding;GO:0016570//histone modification;GO:0006351//transcription, DNA0dependent;GO:0007275//multicellular organismal development
Unigene0000430	670	1.04178	0.171657	0.873582	0.800981	0.473576	0.760947	0.720678	0.169394	0.45904	0.525045	0.32929	0.626007	0.270395	0.900519	0.104475	0.364842	0.186523	0.132442	0	0	0	0	0
Unigene0000431	416	0.629202	0.276467	0.703486	0.793872	0.65377	1.68515	0.435265	0	0.277245	0.33825	0.0662933	0.840193	0.435492	0.870213	0.33653	0	0.450613	0.213308	0	0	0	0	0
Unigene0000432	297	0.146885	0.12908	0.656903	0.694972	0.610478	1.07288	0.609665	0	0	0	0.0928553	0.706102	0.813309	0.203147	0.117842	0	0.210387	0.0995918	0	0	0	0	0
Unigene0000433	307	0.2842	0.124876	0.953258	0.537867	0	0.830349	0.589806	0	0.125227	0.114586	0.0898307	0	0.196704	0	0	0.132706	0	0	0	0	0	0	0
Unigene0000434	255	0.513232	0	0.573824	0.323775	0.533271	0.499838	0	0.222538	0.301526	0.275906	0.216298	0.274134	0	0.236607	0	0	0.12252	0.23199	0	0	0	0	0
Unigene0000435	552	0	0	1.94393	0.673065	0.739044	3.69445	0.218684	0.616816	1.46257	2.10303	0.399682	2.15284	3.71956	1.53023	0	1.77134	1.24517	0.535847	PREDICTED: zinc finger protein ZAT90like [Cicer arietinum]	0	GO:0043231//intracellular membrane0bounded organelle	GO:0043169//cation binding;GO:0001071//nucleic acid binding transcription factor activity;GO:0097159	GO:0006351//transcription, DNA0dependent
Unigene0000436	422	0.206752	0.0908455	0.577903	0.195646	0.644474	0.906104	0.715128	0	0.546606	0.500161	0.196052	0	0.4293	0.142973	0.66349	0.193084	0.296138	0.210276	0	0	0	0	0
Unigene0000437	1076	0.0810868	0.106887	0.815939	0.767311	1.39017	1.53993	0.61703	0.210956	0.214375	0.359626	0.179411	0.259867	0.39286	0.616806	0.032527	0.0757262	0.0290358	0.219916	0	0	0	0	0
Unigene0000438	594	0.881307	0.38724	0.328451	0.208492	0.457859	0.858307	0.508054	0.0955339	0.0647216	0.118444	0.185711	0.588418	0.101664	0.203147	0	0.342935	0	0.0497959	0	0	0	0	0
Unigene0000439	240	0.908848	0.319473	0	0.516017	0.188867	0	0	0	0	0.146575	0.229817	0	0	0	0	0	0	0	0	0	0	0	0
Unigene0000440	350	0.498568	0.219067	0.557429	0.35384	0.777052	0.728335	0	0	0	0.100509	0	0	1.20776	0.172385	0.0999974	0	0	0.169021	0	0	0	0	0
Unigene0000441	254	0	0.150932	0.384055	0.162525	0.178457	1.00361	0.237625	0	0	0	0	0.550426	0.713246	0	0	0	0	0	0	0	0	0	0
Unigene0000442	345	0.126448	0.222242	0	0.358968	0.788313	0.923613	0.174947	0.657937	0.334301	0	0.0799363	0.607862	0.700153	0.349767	0.91302	0.708534	0.181116	0.342942	0	0	0	0	0
Unigene0000443	621	0	0.61734	0.157085	0.59828	0.510944	0.410495	0.291579	0.0913802	0.24763	0	0.0888181	0.562835	0.194487	0.291472	0.169078	0.328025	0.20124	0.381047	Nuclear transport factor 2 (NTF2) family protein [Arabidopsis thaliana]	0	0	0	0
Unigene0000444	464	0.0940187	0	0	0	0.195379	0	0	0	0	0	0	0.150655	0	0	0.150858	0	0	0	hypothetical protein MtrDRAFT_AC150798g6v2 [Medicago truncatula]	0	0	0	0
Unigene0000445	495	0.176261	0.309792	0.394142	1.08416	1.09886	1.15871	0.243866	0.229281	0.621327	0	0.222853	0	0.975971	0.365665	0.212116	0.74074	0.126232	0.478041	0	0	0	0	0
Unigene0000446	510	0.59877	0.601361	0.860736	0.809438	0.444392	0.999675	0.35504	0.222538	0.376908	0.482835	0.540746	1.50774	1.18408	0.828125	0.754882	0.559186	0.490079	0.637973	hypothetical protein MTR_2g097660 [Medicago truncatula]	0	0	0	0
Unigene0000447	536	0.813894	0.715239	0.181996	1.07824	2.11418	2.73465	1.12606	1.16459	0.932425	0.590675	1.23484	1.04334	1.80263	1.46334	0.19589	0.456053	1.22405	0.441474	0	0	0	0	0
Unigene0000448	436	1.20068	0.879284	0.111869	0.189364	0.519817	0.438504	0	0	0	0	0	0	0	0	0	0	0	0	0	0	0	0	0
Unigene0000449	316	0.96637	1.09187	1.23481	0.130637	1.14754	1.6134	0.573007	1.07748	0.24332	0.445291	0.0872722	0.884862	0.764408	1.90933	0.996809	1.67604	0.395475	0.561622	0	0	0	0	0
Unigene0000450	261	0	0	0.186877	0.474498	0.347341	1.70921	0.231252	0	0	0	0	0	0	0	0	0.156095	0	0.113329	0	0	0	0	0
Unigene0000451	1074	0.852997	0.892383	0.499558	0.307496	0.801892	0.890074	0.674378	0.792557	1.00228	0.818855	0.385168	0.520701	0.843411	0.561777	0.553989	0.644872	0.610888	0.550815	non0LTR retroelement reverse transcriptase0like [Arabidopsis thaliana]	0	0	GO:0003824//catalytic activity	0
Unigene0000452	280	0.467407	0.273834	0.174196	0.147433	0.809429	0.910418	0.21556	0.608005	0.686511	1.13072	0.590958	0.499315	1.07836	0.861926	0.999974	1.60053	0.669483	0.528192	0	0	0	0	0
Unigene0000453	653	0.601259	0.998048	1.12041	0.758615	0.27766	0.487973	0.64701	1.12973	0.470991	0.754199	0.464561	1.07051	0.739825	0.646774	0.643169	0.873461	0.382757	0.0905934	0	0	0	0	0
Unigene0000454	553	0.473324	0.485276	0.264602	0.1493	0.409837	1.15243	0.654866	0	0.0695201	0	0	0	0.109201	0	0.126579	0	0.169489	0.160463	PREDICTED: uncharacterized protein LOC100777125 [Glycine max]	0	0	0	0
Unigene0000455	230	0	0	0.424131	0.179484	0.197078	0.277084	0.787262	0	0	0	0.119904	0	0	0	0	0	0	0	0	0	0	0	0
Unigene0000456	780	0.671149	0.147449	0.437724	0.211699	0.348677	0.57193	0.464283	0.145505	0.147864	0.2255	0.212139	0.716965	0.696787	0.464114	0.269224	0.261158	0.0801091	0.26545	Polynucleotidyl transferase, Ribonuclease H fold [Medicago truncatula]	0	0	GO:0005488//binding	0
Unigene0000457	224	0.584259	0.684585	0.653237	0	0.404715	0	0.5389	0.506671	0	0	0	0	1.07836	0.808055	0	0.545635	0.557902	0.132048	0	0	0	0	0
Unigene0000458	429	0.508446	0.893631	1.13695	0.577361	1.37358	1.18842	1.82899	0.264555	0.448072	0.41	0.321422	1.30357	0.84459	0.562562	0.489498	0.379867	0.436959	0.137896	0	0	0	0	0
Unigene0000459	704	0.247868	0.108911	0.138565	0.879574	0.386318	0.452623	0.42867	0.161213	0.109218	0.0999375	0.156693	0.198591	0	0.342811	0.0994292	0.231481	0.177514	0.0420153	0	0	0	0	0
Unigene0000460	966	0.180641	0.119058	0.403934	0.341874	0.656928	1.05556	0.999698	0.352467	0.119393	0.327745	0.456779	0.144729	0.937705	1.37408	0.181155	0	0.323422	0.643017	PREDICTED: carbamoyl0phosphate synthase large chain0like [Glycine max]	ko00240//Pyrimidine metabolism;ko00250//Alanine, aspartate and glutamate metabolism	GO:0043231//intracellular membrane0bounded organelle;GO:0044444//cytoplasmic part	0	GO:0044763;GO:0044260;GO:0006807//nitrogen compound metabolic process;GO:0044238//primary metabolic process
Unigene0000461	287	0	0.400733	0.339896	1.00686	0.315875	0.888213	0	1.18635	0.80372	1.47086	1.82572	0.487137	0	1.68181	0.60974	0.283907	1.08859	2.06124	PREDICTED: probable pectinesterase/pectinesterase inhibitor 60like [Cicer arietinum]	ko00500//Starch and sucrose metabolism;ko00040//Pentose and glucuronate interconversions	GO:0005618//cell wall	GO:0030234//enzyme regulator activity;GO:0052689	GO:0071555;GO:0000272//polysaccharide catabolic process;GO:0044092//negative regulation of molecular function
Unigene0000462	479	0.728596	0.400175	0.30548	0.172365	1.41946	1.06437	0	0.82929	0.642081	0	0.518168	0.729688	0	0.6298	0.219201	0	0.130449	0	0	0	0	0	0
Unigene0000463	512	0.76684	0.673889	0.476318	0.564393	1.15091	0.622356	1.29673	0.443337	0.150174	0.824484	1.18499	0.546126	0	0.353524	0.478503	0.318287	0.854288	1.21319	0	0	0	0	0
Unigene0000464	528	0.66098	0.508253	0.739015	0.390922	1.54527	1.20699	2.05762	1.07476	0.655306	0.66625	0.104462	0.264788	0.914973	0.685623	0.596575	0.308642	0.828401	0.448163	0	0	0	0	0
Unigene0000465	538	0	0.498806	0	0.997504	0.758276	1.89529	0.560937	0.210956	0.214375	0.19616	0.717644	0.909533	0.673474	1.12146	0.260216	0.60581	0.0580716	0.0549791	0	0	0	0	0
Unigene0000466	333	0.26201	0.690753	0.585886	0.123968	0.408361	0.956896	0.906258	1.36329	0.577246	0.845117	0.745352	0.209922	1.26942	0.181186	0	0.734067	0.562929	0.17765	0	0	0	0	0
Unigene0000467	287	0	0	0.339896	2.3014	0	0	0	0.197725	0	0.367714	0.768726	0	0	0	0.121948	0	0	0.206124	0	0	0	0	0
Unigene0000468	529	0.0824664	0.289881	0.276607	0.858402	0.428431	0.481885	1.93963	0.214545	0.0726741	0.132998	0.104265	0.132144	0.228311	0.684327	0.529287	0.154029	0.118119	0.223658	0	0	0	0	0
Unigene0000469	768	0.397621	0.449259	0.127018	0.430014	1.23944	1.41067	0.550127	0.591116	0.500581	0.732875	0.287271	0.728168	0.471783	0.471366	0.136715	0.159143	0.203402	0.038514	0	0	0	0	0
Unigene0000470	544	0.0801925	0.140944	0.17932	0.15177	0.333294	1.99154	0.4438	0.208629	0	0.452658	0.304169	0.642501	0.777054	0	0.128673	0.074891	0.229725	0.108745	0	0	0	0	0
Unigene0000471	210	0	0.730224	1.16131	0.393155	1.29509	1.21389	0	0.270224	0.549209	0	0	0.99863	1.15025	0	0	0.194003	0.74387	0.563405	0	0	0	0	0
Unigene0000472	812	0	0	0	6.35488	0	0	0	0.279542	0	6.28179	16.1664	0	0	0	0	0	1.1158	10.7096	0	0	0	0	0
Unigene0000473	243	0.718102	0.157765	0	0.169882	0	1.04904	0	0.233527	0.158208	0.289531	0.340469	0	0	0	0.864175	0.670629	1.2857	0	0	0	0	0	0
Unigene0000474	322	0.13548	0.238117	0.30295	0.512812	0.422311	0.791668	0	0	0	0	0.0856461	0.217093	0.187541	0	0	0	0	0.183719	0	0	0	0	0
Unigene0000475	209	0	0.550289	0.233373	0.395037	0	0.914775	0.288788	0.814552	0.551837	0.673263	0.263905	0.334469	0	0.288683	0.16746	0.584795	0	0.141525	0	0	0	0	0
Unigene0000476	397	0.769201	1.54506	1.22859	0.31195	0.685058	0.642109	0.608129	0.571759	0.0968378	0.886096	0.486262	0.176081	0.912668	0.303954	0.705271	0.410486	0.472179	0.223517	0	0	0	0	0
Unigene0000477	617	0	0	1.50199	0.735972	0	0	0	0.183945	0.623089	2.56566	0.223485	0	0	0	0	0	0.101272	0.0479396	PREDICTED: UPF0481 protein At3g472000like [Glycine max]	0	0	0	0
Unigene0000478	294	0.148383	0.130397	1.32721	0.280825	0.308354	0	0.41059	0.386035	0.392292	0.119653	0.187606	0	0	0	0.714267	0.554295	0.637603	0.50304	PREDICTED: UPF0481 protein At3g472000like [Glycine max]	0	0	0	0
Unigene0000479	347	0.12572	0.110481	0.562248	1.54656	1.43691	0.367316	0	0	0.110791	0	0	0	0	0	0.201724	0	0.0900361	0.340966	0	0	0	0	0
Unigene0000480	360	0.605899	0	0	0.11467	0	0	0.167658	0.315262	0	0.0977167	0	0	0	0.167597	0.0972197	0.113169	0	0	0	0	0	0	0
Unigene0000481	464	0.376075	0	0	0.355874	0.390759	0.137348	0.130079	0	0.0828548	0.0758147	0.0594354	0.301311	1.17132	0.390096	0.0754291	0.26341	0.403998	0.127495	0	0	0	0	0
Unigene0000482	1554	0.786031	1.01146	1.56934	1.00945	0.816721	1.47635	1.08751	0.474718	0.766913	0.950757	0.709859	1.16957	1.63211	0.465906	2.02697	1.96625	1.12586	1.48465	0	0	0	0	0
Unigene0000483	235	0.556911	0	0.62266	0.526996	0.771541	0.542377	0.770512	0.241477	0	0.449081	0.234707	0	0.256971	1.54046	0	0.520094	0.398841	0.503468	Disease resistance protein [Theobroma cacao]	0	GO:0043231//intracellular membrane0bounded organelle;GO:0016020//membrane	0	0
Unigene0000484	1003	0.521931	0.305777	0.340404	0.411579	0.813464	1.1437	0.722115	0.452619	0.344967	0.210437	0.219964	0.487865	0.722491	0.721852	0.174472	0.162475	0.373789	0.176942	0	0	0	0	0
Unigene0000485	627	0.139154	0	0.155582	0	0.433761	0.203283	0.192526	0	0	0.112211	0.307889	0	0	0.288683	0	0	0.199314	0	0	0	0	0	0
Unigene0000486	765	0.342155	0	0	0.107925	0.296262	1.08298	0.473387	0.148358	0.150763	0.0919686	0.504696	0.548267	0.631511	0.473214	0.0915009	0.213023	0.0816798	0.502646	0	0	0	0	0
Unigene0000487	1198	0	0	0.936415	4.37623	0	0	0	0	0.0641813	0.587279	4.55797	0	0	0	0	0	0.339026	2.32087	Os05g0366300 [Oryza sativa Japonica Group]	0	0	0	0
Unigene0000488	1016	0.601128	0.226398	0.672097	0.893887	0.892284	0.815434	0.594063	0.670241	0.378392	0.380864	0.380012	0.550426	0.772684	0.534462	0.447823	0	0.0922516	0.203791	0	0	0	0	0
Unigene0000489	558	1.40725	1.23667	0.874104	1.25767	0.243699	0.799471	1.18983	0.203395	0.206691	0.567387	0.395384	1.12749	0.974003	0.432508	0.25089	0.073012	0.167971	0.159026	0	0	0	0	0
Unigene0000490	336	0.129835	0.114098	0.580655	0.122861	0.809429	0.948353	1.43707	0.33778	0.343255	0.314089	0.65662	0.832192	0.53918	1.43654	0.624984	0.727513	0.371935	0.176064	0	0	0	0	0
Unigene0000491	234	0.559291	0.327665	0.625321	0.176416	0.581129	0.272347	0.257935	0.242509	0	0.150333	0	0	0	0	0	0.348211	0	0.25281	copia0type polyprotein [Arabidopsis thaliana]	0	0	GO:0005488//binding	0
Unigene0000492	289	1.2076	0.265306	0.337543	0.285684	0	0.66155	0.208847	0.392714	0	0	0.0954257	0	1.67165	0.417542	0.121104	0	0.216211	0.307046	0	0	0	0	0
Unigene0000493	1826	0.860071	0.671839	1.25544	0.972123	1.51424	0.66312	1.71881	0.404005	0.484242	0.443096	0.40778	1.18676	1.02521	1.12343	0.766683	0.691655	0.307977	0.307775	0	0	0	0	0
Unigene0000494	363	0.721069	0.316833	0.806199	1.81956	0.499482	2.10675	0.332544	2.03227	0.741356	0.387636	1.44348	1.73316	0.998152	2.16075	0.482081	2.58137	1.20495	0.407421	Serine/threonine protein kinase [Medicago truncatula]	0	0	GO:0004672//protein kinase activity;GO:0032550	GO:0006796//phosphate0containing compound metabolic process;GO:0006464//protein modification process
Unigene0000495	719	0.606741	0.746474	0.203512	0.401904	0.945647	1.2409	0	0.3157	0.481226	0	0.0767122	0.875016	1.00787	0.839149	0.632807	0.169989	0.130358	0.32911	0	0	0	0	0
Unigene0000496	784	0.945944	1.02688	1.67975	2.05354	1.38759	1.70703	1.46273	1.37525	1.37302	1.74993	0.879401	1.33745	1.54052	1.77003	0.982117	1.50699	1.27521	1.01866	0	0	0	0	0
Unigene0000497	427	1.22599	0.359127	0.79959	0.580065	0.212309	0.298498	0.424052	0	0	0	0	0	0	0	0	0	0	0	0	0	0	0	0
Unigene0000498	881	1.38648	0.957332	1.0519	1.07772	0.926112	1.88077	1.09615	1.03059	1.61459	0.918381	0.782577	1.34889	0.41127	1.09575	1.27125	1.4798	0.709252	0.772204	0	0	0	0	0
Unigene0000499	472	0.369701	0	0.620021	0.174921	0.192068	0.675098	0.511498	0	0	0	0	0.296204	0	0	0.889807	2.07156	2.05195	1.44134	0	0	0	0	0
Unigene0000500	334	0	0.229562	0.584132	0.247194	0.271425	2.09887	0.361418	0	0	0	0	0	0	0	0.209575	0	0.187081	0.0885592	0	0	0	0	0
Unigene0000501	552	0.553212	0.625056	0.706884	0.523495	0.328464	0.461806	0.218684	0.411211	0.278584	0.254913	0	0.126638	0.437596	0	0.317021	0.885668	0.622587	0.214339	hypothetical protein VITISV_008952 [Vitis vinifera]	0	0	0	0
Unigene0000502	269	0.648694	0	0.36264	0	0	0	0	0	0	0	0	0	0	0.448586	0	0	0.232287	0	0	0	0	0	0
Unigene0000503	324	0.134644	0	0	0	0.279803	0.393391	0.745146	0	0	0	0.170235	0.431507	0	0	0.108022	0.125743	0.192855	0	0	0	0	0	0
Unigene0000504	810	0.215431	0.0473294	1.8667	0.968327	0.951329	0.472069	0	0.420349	0.854325	0.781733	1.12355	0.345205	0.298213	0.0744874	0.864175	1.30773	1.23427	1.24158	PREDICTED: H/ACA ribonucleoprotein complex non0core subunit NAF10like [Cicer arietinum]	0	0	0	0
Unigene0000505	476	0.183297	0.322158	0.307406	0.693804	0.761816	0	0.2536	0.238433	0.40383	0.812937	0.521433	0	0.253732	0.253508	0.735275	0.941487	0.393813	1.11852	PREDICTED: H/ACA ribonucleoprotein complex non0core subunit NAF10like [Cicer arietinum]	0	0	0	0
Unigene0000506	518	0.757958	1.99825	1.69488	1.19541	1.57511	1.35332	0.233038	6.79213	6.23426	7.06276	4.47211	4.3184	3.26423	2.44601	1.55401	3.146	2.11098	1.19914	0	0	0	0	0
Unigene0000507	338	0	0	0.144305	0	0.40232	0.377096	0.17857	0	0.113741	0	0	0.206817	0	0.178505	0	0.120535	0	0.0875111	gag/pol polyprotein [Pisum sativum]	0	0	GO:0004175//endopeptidase activity;GO:0003676//nucleic acid binding;GO:0016891//endoribonuclease activity, producing 5'0phosphomonoesters;GO:0034061	GO:0006260//DNA replication;GO:0019538//protein metabolic process
Unigene0000508	338	0	0	0	0.244268	1.60928	1.50839	0.535711	0	0.227483	0	0	1.44772	2.14396	1.60655	0	0	0	0	gag/pol polyprotein [Pisum sativum]	0	0	GO:0004175//endopeptidase activity;GO:0003676//nucleic acid binding;GO:0016891//endoribonuclease activity, producing 5'0phosphomonoesters;GO:0034061	GO:0006260//DNA replication;GO:0019538//protein metabolic process
Unigene0000509	235	0	0.489406	0	0	0.771541	1.35594	0.513675	0	0	0	0.117353	0	0	0	0.148932	0.173365	0.398841	0	0	0	0	0	0
Unigene0000510	291	0.899478	0.790449	2.01134	4.25581	0.623066	0.219001	0.207412	2.7301	3.96336	6.89054	6.53912	1.68154	1.24512	0.207336	2.52571	1.54003	1.39571	2.94771	Histone superfamily protein isoform 2, partial [Theobroma cacao]	ko05322//Systemic lupus erythematosus	GO:0031981//nuclear lumen;GO:0000785//chromatin;GO:0044444//cytoplasmic part	GO:0003676//nucleic acid binding;GO:0016868//intramolecular transferase activity, phosphotransferases;GO:0046983//protein dimerization activity	GO:0006007//glucose catabolic process;GO:0034728//nucleosome organization;GO:0006950//response to stress
Unigene0000511	245	0	0	0	0.505486	0.370025	0	0.739063	0.463242	0	0	0	0	0	0	0	0	0	0	0	0	0	0	0
Unigene0000512	471	0.833593	0.73255	0.932007	0.876461	1.25109	1.48837	0.768876	0	0.326494	0.821567	0.409865	1.18733	1.41034	1.53719	0.520156	0.778485	0.331662	0.439599	0	0	0	0	0
Unigene0000513	698	1.56249	1.09848	0.838539	0.591423	0.324699	0	0.172942	0.406498	0.385548	0.352788	0.0790201	0.200298	0.519096	0.0864395	0.701987	0.642046	0.313321	0.254259	0	0	0	0	0
Unigene0000514	676	0.387201	0.850668	0.505067	0.793872	1.40812	0.659919	1.24999	0.335782	0.625578	0.364269	0.0815918	0.620451	0.982648	0.624769	0	0	0	0	PREDICTED: chromodomain0helicase0DNA0binding protein 10like [Glycine max]	0	0	0	0
Unigene0000515	251	0.173804	0.458209	0	0.986805	0.18059	0.507803	0.480931	0	0.459497	0.140151	0	0.557005	0	0.240378	0	0.324627	0	0	0	0	0	0	0
Unigene0000516	460	0.853527	1.58348	0.424131	0.44871	0.788313	0.554168	0.787262	2.22054	1.3372	0.229422	0.359713	0.455896	1.18151	0.786976	1.29344	0.442834	1.01878	0.321508	0	0	0	0	0
Unigene0000517	511	0.170742	0	1.04995	0.727068	0	0.498859	0.118115	0	0	0	0	0	0	0	0	0	0	0	0	0	0	0	0
Unigene0000518	839	1.3519	0.959562	0.755751	0.295218	0.324158	0.151917	0.431634	0.0676366	0.0458219	0.167714	0.0657402	0.49991	0.0719764	0	0.166861	0.0971173	0.186189	0.141019	0	0	0	0	0
Unigene0000519	541	0	0	0	0.381528	0.167571	0.235598	0	0	0.142124	0	0	0	0	0	0.129387	0	0	0.0546742	0	0	0	0	0
Unigene0000520	359	0.364552	0.640726	0.679318	0.459959	0	1.24263	1.51312	0.15807	0.321264	0.293967	0.153638	0	0.168212	0.840318	0	0.226968	0.174053	0.329568	0	0	0	0	0
Unigene0000521	222	1.17905	0.345376	0.659122	0.185952	0.816721	0.574138	1.90314	0	0	0	0	0	0	0	0.157654	0.183517	0.281464	0.532951	0	0	0	0	0
Unigene0000522	361	1.20844	1.48675	1.35111	0.800469	0.50225	1.58882	0.334387	0.471583	0.425979	0.194892	0.381967	0.19364	0	0.334265	0.290851	1.35426	0.951989	0.245807	0	0	0	0	0
Unigene0000523	304	0	0.252216	0	0.271588	0.149105	0.419272	0	0	0	0	0.181434	0	0	0	0	0	0	0	0	0	0	0	0
Unigene0000524	281	0.310496	0	0	0.293817	0	0.907179	0	0	0	0	0	0	0	0	0	0	0	0	0	0	0	0	0
Unigene0000525	723	0.7844	0.742344	0.472234	0.285486	0.752332	1.05775	1.16873	0.627907	0.584911	0.486556	0.305151	1.83704	0.918769	0.333803	0.435673	0.788893	0.561761	0.3682	0	0	0	0	0
Unigene0000526	281	0.465744	0.27286	0.173577	0.440726	0.645239	1.13397	0.644379	0.403894	0	0	0	0	0	0	0.249104	0.144985	0.111183	0.210525	0	0	0	0	0
Unigene0000527	209	0	0	0.466747	0	0	0.914775	0.866365	0.271517	0	0.168316	0.263905	0	0	0	0.16746	0.194932	0.149486	0.141525	0	0	0	0	0
Unigene0000528	446	0.391253	1.28935	0.656166	0.647913	2.03265	4.00094	1.21796	0.254471	0.344795	0.630996	0.123668	1.25389	0.270799	0.811679	1.49099	0.548081	0.420303	0.596881	F0box protein [Medicago truncatula]	0	GO:0009536//plastid	0	0
Unigene0000529	589	0.148131	0	0.16562	0.420523	0.923491	0.649195	0.819787	0.578069	0.65271	1.01532	1.73241	8.9012	42.241	14.7508	0.772476	1.10671	0.95478	2.31006	Ribulose bisphosphate carboxylase small chain [Medicago truncatula]	ko00710//Carbon fixation in photosynthetic organisms;ko00630//Glyoxylate and dicarboxylate metabolism	GO:0009536//plastid	GO:0016831//carboxy0lyase activity;GO:0016491//oxidoreductase activity	GO:0044710;GO:0043094
Unigene0000530	763	0.686103	0.301469	0.767104	0.486936	1.06934	2.08812	1.26567	0.0743737	0.100772	0.322734	0.108433	0.0916174	0.395729	0	0.275222	0.106791	0.286629	0.465197	0	0	0	0	0
Unigene0000531	574	0.304005	0.267155	0.169948	0.647268	1.73731	0.888213	0.736058	0.593175	2.54511	0.429	0.816771	1.58319	1.15727	1.15624	1.95117	0.567815	0.381007	0.515309	NADH dehydrogenase subunit 2 (mitochondrion) [Beta vulgaris subsp. maritima]	ko00190//Oxidative phosphorylation;ko05012//Parkinson's disease	GO:0043231//intracellular membrane0bounded organelle	GO:0050136//NADH dehydrogenase (quinone) activity	GO:0022904//respiratory electron transport chain
Unigene0000532	261	0.167144	0.146884	0.560632	1.10716	1.04202	0.488347	0.231252	0.434844	0	0.134782	0.105663	0.535664	0.462745	0	0	0	0	0.453314	0	0	0	0	0
Unigene0000533	738	0.118224	1.03894	0.528726	0.447494	0.491361	0.777186	0.899627	0.384466	0.625116	0.715	0.896846	1.04193	0.736441	0.572281	0.33197	0.772859	0.381007	0.521035	0	0	0	0	0
Unigene0000534	338	0	0	0	0	1.60928	0	0	0	0	0	0	0	0	0	0	0	0	0	dehydrin Rab18 [Arabidopsis thaliana]	0	GO:0016020//membrane	GO:0032550	GO:0009725//response to hormone stimulus;GO:0009409//response to cold;GO:0043200//response to amino acid stimulus
Unigene0000535	1631	0.829164	1.19876	0.807434	0.708692	0.861538	0.742401	0.999162	0.382721	0.164998	0.345094	0.287447	1.15721	0.999682	1.22075	0.32188	0.674432	0.306487	0.344572	Cysteine0rich RLK (RECEPTOR0like protein kinase) 8 [Theobroma cacao]	0	0	0	0
Unigene0000536	315	0	0	0.309683	0.131052	0.431695	0.40463	0	0	0.122046	0	0	1.10959	1.15025	0.383078	0	0	0	0	0	0	0	0	0
Unigene0000537	416	0	0	0	0.198468	0.544808	2.60432	0.580354	0	0	0	0	0	0	0	0	0	0	0	0	0	0	0	0
Unigene0000538	1008	2.12065	2.24392	1.01615	0.737167	0.584588	1.64381	0.119756	2.58965	1.56372	0.907369	0.246232	0.485445	1.318	0.239424	1.70134	2.1017	1.20879	0.792288	0	0	0	0	0
Unigene0000539	1143	1.0305	1.00621	1.19484	1.26408	0.95177	0.501805	0.897695	7.14924	7.93782	9.81783	6.56275	4.15877	5.07197	4.01176	1.22481	0.819804	0.656011	1.31979	PREDICTED: UPF0565 protein C2orf69 homolog isoform X1 [Cicer arietinum]	0	0	0	0
Unigene0000540	300	0	0.894525	1.62583	0.412813	0.302187	0.424862	0	0.189157	0	0	0.183854	0	0.402588	0	0.699982	0.271605	0.416567	0.0985959	0	0	0	0	0
Unigene0000541	1350	0	0	0.0722593	0.183473	0	0.0472069	0	0	0.056955	0.104231	0.0408563	0	0	0	0	0.0603566	0.0925705	0.0438204	PREDICTED: protein CPR050like isoform X1 [Cicer arietinum]	0	0	0	0
Unigene0000542	1412	0	0.0543014	0	0.175416	0.192612	0.270804	0	0.0803783	0.108908	0.174395	0.0390624	0.0990143	0	0	0	0.230826	0.0885058	0.0837925	PREDICTED: protein CPR050like isoform X1 [Cicer arietinum]	0	0	0	GO:0006952//defense response;GO:0044763
Unigene0000543	483	0.632242	0.634978	2.01967	1.3675	0	0.527779	0	3.05471	2.86544	2.40347	1.31324	0.144729	1.50033	0	0.724619	1.18089	0.840896	0.306198	0	0	0	0	0
Unigene0000544	485	0.359791	0.948539	0.201134	0.680929	1.21498	1.97101	0.248894	0	0.554871	0.145064	0.170586	0.576529	0.622559	0.248803	0	0.756013	0	0.670858	0	0	0	0	0
Unigene0000545	285	0.459207	0.403545	0	0.144847	0	0.223612	0.847113	0	0.134893	0	0	0.490555	0.211888	0.846804	0.122804	0	0.219246	0	50S ribosomal protein L17 [Medicago truncatula]	0	0	GO:0003676//nucleic acid binding;GO:0003824//catalytic activity	GO:0006259//DNA metabolic process
Unigene0000546	513	0.765346	0.298922	0.665546	0.160941	0.530152	0.745372	0	0.774327	1.04917	0.137146	0.591342	0.272531	0.588579	0.823282	0.682243	0.714749	0.121803	0	0	0	0	0	0
Unigene0000547	202	0	0	0	0	0.224396	0	0	0	0	0	0	0	0	0	0	0	0	0.14643	PREDICTED: cytochrome P450 71A10like [Cicer arietinum]	0	0	GO:0016491//oxidoreductase activity;GO:0005488//binding	0
Unigene0000548	451	0.386915	0	0.648892	0.457664	0.703539	0.42392	0.267658	0.377475	0.255729	0.858	0.917229	0.309996	0.267797	0.13378	0	0.722673	0.969835	0.393509	PREDICTED: cytochrome P450 71A10like [Cicer arietinum]	0	0	GO:0005488//binding;GO:0016491//oxidoreductase activity	GO:0006091//generation of precursor metabolites and energy
Unigene0000549	451	0.483644	0.595028	0.865189	0.732263	0.804045	0.989146	0.802973	0.5033	0.170486	0.234	0.122297	0.77499	1.07119	1.3378	0.155207	0.271003	0.554191	0.393509	Phospholipase D alpha [Medicago truncatula]	ko04144//Endocytosis;ko04666//Fc gamma R0mediated phagocytosis;ko00564//Glycerophospholipid metabolism;ko04724//Glutamatergic synapse;ko04912//GnRH signaling pathway;ko00565//Ether lipid metabolism	0	GO:0046872//metal ion binding;GO:0004620//phospholipase activity	GO:0006650//glycerophospholipid metabolic process
Unigene0000550	763	0.571752	0.452203	0.575328	0.54104	0.772299	1.83754	0.949255	0.297495	0.604633	1.24483	0.506019	0.916174	0.949749	0.790758	0.137611	0.533954	0.655151	0.620262	0	0	0	0	0
Unigene0000551	273	0.958785	0	0	0.604855	0.166037	0.700322	0.221087	0	0	0	0	0	0	0	0.128202	0	0	0	0	0	0	0	0
Unigene0000552	596	0	0	0.163675	0.138528	1.67318	3.20785	1.0127	0.0952133	0	0	0	0	0	0	0.17617	0.410141	1.10083	1.14146	PREDICTED: uncharacterized protein LOC101498282 [Cicer arietinum]	0	0	0	0
Unigene0000553	203	0	0	0.240271	0.203356	0	0	0.297324	0.279542	0.189382	0	0.135852	0.344355	0	0	0.172409	0.200693	0.153904	0	0	0	0	0	0
Unigene0000554	393	0.444017	0.487745	0.496438	0.210083	0	1.13513	0.460739	0	0.29347	0	0	0.889365	0.921957	0.460571	0.0890562	0	0.0794975	0.075264	Mitochondrial folate transporter/carrier [Medicago truncatula]	0	GO:0009941//chloroplast envelope;GO:0031224//intrinsic to membrane	GO:0003676//nucleic acid binding;GO:0051184	GO:0006862//nucleotide transport
Unigene0000555	232	0.188037	0.165245	0.210237	0	0.781518	1.64817	0.260159	0	0	0.151629	0	0	0.260294	0.260064	0	0	0	0	0	0	0	0	0
Unigene0000556	669	1.23897	0.974178	0.874888	0.493648	1.15183	1.33365	0.992414	0.254471	0.517192	0.368081	0.288559	0.313471	1.17346	1.08224	0.209262	0.365388	0.326902	0.13264	0	0	0	0	0
Unigene0000557	394	0	0	0.123794	0.8382	0.230091	1.13225	0.30638	0	0	0.178569	0.629955	0.709686	0.306539	0.612536	0	0	0	0.225219	0	0	0	0	0
Unigene0000558	1219	0.572597	0.597538	0.720222	0.711163	0.89243	1.67296	1.03978	0.232761	0.28384	0.404013	0.769199	1.14691	0.54493	0.74243	0.315824	0.601586	0.845778	0.485295	0	0	0	0	0
Unigene0000559	1350	0.613977	0.454362	0.433556	0.550418	0.738679	0.660896	1.25184	0.0420349	0.0284775	0.0260578	0	0.103562	0	0.0446924	0	0	0.0462852	0.0219102	0	0	0	0	0
Unigene0000560	700	0.373926	0.438135	0.696786	0.17692	1.23033	1.82084	0.344896	0.729606	0.384446	0	0.196986	0	0.258807	0.34477	0.349991	0.407407	0.223161	0.253532	0	0	0	0	0
Unigene0000561	332	0.919798	0.923778	0.881476	0.248683	1.3653	0.383911	0.72719	1.02555	0.578985	0.847663	0.498398	0.210554	1.63703	0.181731	0.527095	0.613565	0.47052	0.356371	0	0	0	0	0
Unigene0000562	569	0	0	0	2.24907	0	0	0	0	0	0.123649	1.98717	0	0	0	0	0	0.274539	2.59919	F0box/kelch0repeat protein [Medicago truncatula]	0	0	0	0
Unigene0000563	647	0	0	2.33698	1.4675	0	0.196999	0	0.175416	0.237679	1.08742	1.15086	0	0	0	0	0.125937	0.820901	1.50865	PREDICTED: MADS0box transcription factor 180like isoform X2 [Cicer arietinum]	0	0	GO:0005488//binding	GO:0006351//transcription, DNA0dependent
Unigene0000564	719	0.424719	0.426557	0.610536	0.287075	1.00869	0.88636	1.00735	0.394625	0.374287	0.0489263	0.19178	0.194448	0.419946	0.16783	0.38942	0.226652	0.173811	0.0822775	0	0	0	0	0
Unigene0000565	525	0.332379	0	0.836143	0.471787	0.345356	0.728335	0.804757	0.10809	0.366139	0.536046	0.157589	0.798904	0.920201	0.229847	0.26666	0.310405	0.119019	0.112681	0	0	0	0	0
Unigene0000566	272	0	0.281888	0	0	0.166647	0	0.2219	0	0.14134	0	0	0	0	0.221819	0	0	0	0	reverse transcriptase family member [Glycine max]	0	GO:0032991//macromolecular complex;GO:0044439;GO:0043232;GO:0044428//nuclear part;GO:0016020//membrane	GO:0016772//transferase activity, transferring phosphorus0containing groups;GO:0032550;GO:0003676//nucleic acid binding;GO:0016887//ATPase activity	GO:0010467//gene expression;GO:0008610//lipid biosynthetic process;GO:0050789//regulation of biological process;GO:0006974//response to DNA damage stimulus;GO:0006625//protein targeting to peroxisome;GO:0006259//DNA metabolic process;GO:0009154;GO:0044255//cellular lipid metabolic process;GO:0034645//cellular macromolecule biosynthetic process;GO:0044267//cellular protein metabolic process;GO:004…
Unigene0000567	222	0.589523	0	0	0	1.0209	0.287069	0.271877	0.255618	0	0.158459	0.124225	0	0	0.815335	0	0	0	0.133238	Mitochondrial folate transporter/carrier [Medicago truncatula]	0	GO:0009941//chloroplast envelope;GO:0031224//intrinsic to membrane	GO:0003676//nucleic acid binding;GO:0051184	GO:0006862//nucleotide transport
Unigene0000568	729	0.777944	0.420705	0	0.169882	0.497427	0.437101	0.496764	0.155685	0	0.289531	0.0378299	0.191781	0.248511	0.0827638	0.0960194	0.279429	0.0857134	0.324595	0	0	0	0	0
Unigene0000569	279	0.469083	0.274816	0.174821	0.295923	0.81233	1.1421	0.216333	0.406789	1.24015	0.882602	1.18615	0.501105	1.73156	1.08127	0.376334	0	0.223961	0.318051	0	0	0	0	0
Unigene0000570	513	0.850384	0	1.04586	0.965645	0.176717	0	0.470618	0.221236	1.04917	0.822877	0.268792	0.545061	0.470863	0.352835	0.750468	0.952999	0.73082	0.691901	0	0	0	0	0
Unigene0000571	337	0.906151	0.227518	0.723665	1.10247	0.403514	1.13465	1.0746	0.673556	0	0.313157	0.163668	0	0.179193	0.537105	0.311565	0	0.278123	0.175542	0	0	0	0	0
Unigene0000572	344	0.63408	0.668665	0.850727	0	0.395303	0.18526	0.526367	0.494888	0	0.102262	0	0.609629	0.526641	0.350784	0.813932	0	0.0908213	0	0	0	0	0	0
Unigene0000573	455	0	0.337027	0.750385	0.362913	0.49811	1.26058	0	0	0.0844937	0.231943	0.121222	0.460906	0.530885	0.795624	0.384605	0.26862	0.205995	0.260033	0	0	0	0	0
Unigene0000574	440	0.594882	0.435645	0.665114	0.562927	0.618109	1.15871	0.411524	0.128971	0.349496	0.1599	0.0626773	0.317746	0.686229	0	0.159087	0.37037	0.0710058	0.134449	0	0	0	0	0
Unigene0000575	272	0	0.281888	0.53796	0.15177	0.499941	0	1.3314	0	0	0	0	0.257	0.444031	0	0.128673	0	0	0.108745	NBS/LRR resistance protein0like protein [Medicago truncatula]	0	0	0	0
Unigene0000576	1708	0.434204	0.269345	0.656806	0.79759	0.928853	0.932806	0.954118	0.531589	0.270103	0.782649	0.371367	2.45565	1.48496	2.33144	0.16393	0.572469	0.237794	0.121224	0	0	0	0	0
Unigene0000577	437	0.0998277	0.263182	0.223227	0.472326	0.829804	0.291667	1.38116	0.259712	0.0879739	0.643991	0.25243	0	0.552752	0.552264	0.240268	0.186456	0.142986	0	0	0	0	0	0
Unigene0000578	424	0.308665	0.0904169	1.26539	0.389446	3.20717	1.95396	1.85056	0.803025	0.634699	1.16154	0.715468	1.81355	1.7091	0.426897	0.412725	0.28826	0.736852	1.32546	0	0	0	0	0
Unigene0000579	363	0.240356	0	1.07493	0.454891	0.249741	0.877814	0	0	0.317724	1.84127	0.379863	0.385147	0.665435	0	0.0964162	0.224467	0.688541	0.570389	PREDICTED: pleiotropic drug resistance protein 10like, partial [Cicer arietinum]	0	0	GO:0017111//nucleoside0triphosphatase activity;GO:0032550;GO:0015604//organic phosphonate transmembrane transporter activity	GO:0009154
Unigene0000580	363	0.480713	0.211222	0.268733	0.227445	0.499482	0.702251	0.997633	0.312656	0	0.193818	0.227918	0.192573	0.166359	0.332423	0.578497	0.448933	0.34427	0.244453	0	0	0	0	0
Unigene0000581	294	0.44515	0.130397	0.331803	0.702063	0.616708	1.73413	1.02648	0.77207	0.130764	0.957225	0.562817	0.475538	0.616206	2.46265	0	0.277148	0.850137	0.50304	0	0	0	0	0
Unigene0000582	1176	0.519342	0.782383	1.03688	0.912682	0.616708	1.24641	0.513238	0.820324	1.0788	1.25636	0.750423	1.18885	1.54052	1.28263	1.13092	0.866087	0.74387	0.779712	0	0	0	0	0
Unigene0000583	617	0.636341	0.807744	1.18578	2.0072	0.293861	0.413156	0.195646	1.28762	1.68234	0.684175	1.25152	0.453187	0.391496	0.195575	0.794145	0.924425	0.607634	1.72583	0	0	0	0	0
Unigene0000584	660	0.198294	0.522774	0.739015	0.938212	0.686788	1.25527	1.2803	0.515883	0.407746	1.1193	0.919268	0.529576	0.914973	0.822747	0.424231	0.679012	0.284023	0.941142	RNA0directed DNA polymerase (Reverse transcriptase) [Medicago truncatula]	0	0	GO:0097159;GO:1901363;GO:0016787//hydrolase activity	GO:0071704;GO:0044238//primary metabolic process
Unigene0000585	796	0.767269	0.192647	0.735302	0.829775	1.53751	0.880681	0.909901	0.427742	0.193189	0.220967	0.450395	0.175638	0.303458	0.757975	0.175875	0.204727	0.196247	0.371592	0	0	0	0	0
Unigene0000586	725	0.722064	1.05757	1.61462	0.683277	2.12573	1.75805	0.999009	0.469631	1.27265	1.55268	1.44547	0.482097	1.49929	1.74763	0.675844	0.842911	1.07733	0.815966	0	0	0	0	0
Unigene0000587	316	0.414159	1.33451	1.08046	0.522548	0.860659	1.21005	0.76401	0.538738	0.973281	0.890582	0	0.884862	1.33771	0.190933	0.443026	0.902484	0.395475	0.842433	PREDICTED: probable disease resistance protein At4g272200like [Cicer arietinum]	0	0	GO:0032550	GO:0006950//response to stress
Unigene0000588	465	0.750532	0	0.314678	0.355108	0.584878	1.23347	0.778797	0	0	0.151303	0.23723	0.150331	0.90907	0	0	0	0.134376	0.0636102	0	0	0	0	0
Unigene0000589	733	0.178546	0.261506	0.7985	0.33791	1.05126	1.13026	1.07045	0.387088	0.367138	0.383935	0.263365	1.04904	1.15339	0.411561	0.381982	0.666969	0.29836	0.242118	reverse transcriptase family member [Glycine max]	0	GO:0005739//mitochondrion	GO:0070011;GO:0032550;GO:0003677//DNA binding;GO:0016887//ATPase activity	GO:0051603//proteolysis involved in cellular protein catabolic process;GO:0016043//cellular component organization;GO:0006950//response to stress;GO:0006260//DNA replication
Unigene0000590	619	0.211428	0.247734	0.157593	0.0666903	0.512595	0.823642	0.292521	0.183351	0.24843	0.113661	0.712841	0.225861	0.487788	0.389886	0.282707	0	0.252363	0.191139	0	0	0	0	0
Unigene0000591	383	0.797318	0	0.38205	0.431137	0	0.166395	0	0.29633	0	0	0.576042	0.547552	0.315343	0.315064	0.63967	0	0.24472	0.463375	PREDICTED: agamous0like MADS0box protein AGL620like [Cicer arietinum]	0	GO:0043231//intracellular membrane0bounded organelle	GO:0003676//nucleic acid binding;GO:0001071//nucleic acid binding transcription factor activity;GO:0005515//protein binding	GO:0006351//transcription, DNA0dependent
Unigene0000592	559	0.546284	0.617229	1.48332	1.10773	0.486526	1.02605	0.323918	1.01515	0.687739	0.881023	0.296007	1.25052	1.18832	0.3238	0.187831	0.874577	0.5589	0.0529137	0	0	0	0	0
Unigene0000593	387	0.676352	0.0990615	0.882235	0.21334	0.819887	0.164675	0	0.293267	0.59604	0.545395	0.213783	0	0.468126	0.311808	0.361748	0.210546	0.40365	0.458585	0	0	0	0	0
Unigene0000594	239	0	0	0.20408	0.172725	0	0.26665	0.505078	0.712307	0	0	0	0	0	0.252447	0	0.170463	0	0	PREDICTED: 60S ribosomal protein L30like [Setaria italica]	ko03010//Ribosome	GO:0030529//ribonucleoprotein complex	GO:0005198//structural molecule activity	GO:0010467//gene expression
Unigene0000595	395	0.662654	0.582331	1.11133	0.836077	0.688527	1.12938	0.305604	1.29297	1.26527	0.623408	0	0	0.917289	0.152746	0.797448	0.928269	0.94914	0.748829	0	0	0	0	0
Unigene0000596	291	0.299826	0.658708	0.670447	1.13488	0.155766	0.219001	0	0.390014	0	0.483546	0	0	0.622559	0	0.120272	0.420007	0.214725	0	0	0	0	0	0
Unigene0000597	215	0	0.713243	0.226861	0	0.421656	0.889246	0.280729	0	0	0.327237	0	0	0.842626	0.841881	0	0	0.145314	0.137576	0	0	0	0	0
Unigene0000598	247	1.23633	0.310419	0	0.501393	0	1.03205	0.733078	0	0.155646	0.142421	0.111652	0	0.488973	0	0.141697	0	0	0.119752	0	0	0	0	0
Unigene0000599	413	0.739402	1.1139	0.944794	0.399819	0.987778	0.925849	0.876854	0.137402	0.279259	0.170354	0.467424	0.507778	0.87731	1.60698	0.847436	0.295937	0.0756478	0.286477	0	0	0	0	0
Unigene0000600	270	0.484719	0	0.361296	0.611575	0	0	0	0	0.284775	0	0.204282	0.776712	0	0	0.129626	0.452675	0.231426	0.109551	0	0	0	0	0
Unigene0000601	2656	0.542024	1.09699	0.789656	0.761591	1.07518	1.60763	0.931712	0.170925	0.303967	0.291384	0.342649	0.76326	1.00041	0.999522	0.672046	0.598226	0.541098	0.367507	Integrase core domain containing protein [Solanum demissum]	0	0	GO:0005488//binding	0
Unigene0000602	698	0.124999	0.164771	0.698782	1.18285	0.909158	0.730422	0.518826	0	0.330469	0.100797	0.23706	0.400597	0.86516	0.691516	0.050142	0.116736	0.0895202	0.466141	PREDICTED: cytochrome P450 71D110like [Glycine max]	0	0	0	0
Unigene0000603	314	0	0.122092	0.932007	0.262938	0.43307	0.811838	0.576657	0	0	0	0	0	0	0	0	0	0	0	0	0	0	0	0
Unigene0000604	745	0.117113	0.154376	0	0.498701	1.21686	2.56628	0.97219	0	0	0	0	0	0	0	0	0	0	0	0	0	0	0	0
Unigene0000605	544	1.28308	1.40944	0.986259	0.910617	0.666589	1.28864	0.6657	0.834516	0.565362	1.09931	0.557644	0	0.555039	0.998186	0.321683	0.823801	0.344587	0.326236	0	0	0	0	0
Unigene0000606	283	0.462453	0.541863	0.51705	0.14587	0.800848	1.35115	0.213275	1.0026	0.81508	0.745823	0.194898	0.741033	0.213386	0	0.989374	0	0.331193	0.209037	Sterol 30beta0glucosyltransferase [Medicago truncatula]	0	0	0	0
Unigene0000607	899	0.194103	0	0.108509	4.08681	0	0.141778	0.134275	0.126245	0	0.0391301	5.79783	0	0	0.134226	0	0.0906356	0.104258	6.64617	PREDICTED: probable GMP synthase [glutamine0hydrolyzing]0like [Cicer arietinum]	ko03410//Base excision repair	GO:0043231//intracellular membrane0bounded organelle	0	0
Unigene0000608	636	0.754515	0.120556	0.613522	0.58417	0.997787	1.30264	0.379602	0.3569	0.664923	1.21685	0.433617	0.329736	0.7596	0.853794	0.66036	0.320289	0.294741	0.604597	0	0	0	0	0
Unigene0000609	395	0	0.388221	0	0.418039	0.688527	0.64536	0.76401	0.718318	0	0.267175	0.0698178	0.353945	0.305763	0.305493	0	0	0	0	0	0	0	0	0
Unigene0000610	201	0	0	0.242662	0	0.676538	0	0	0	0	0	0	0.347782	0	0	0	0	0	0	0	0	0	0	0
Unigene0000611	201	0.651115	0.19073	0.242662	0.821519	0	0	0.600565	0	0	0	0	0	0.300439	0	0.174125	0.20269	0	0	0	0	0	0	0
Unigene0000612	277	0	0.5536	0	0.44709	1.14547	0	0.653684	0	0	0	0.298679	0.757084	0.436016	0.217815	0	0	0	0	0	0	0	0	0
Unigene0000613	870	0.351003	0.308457	0.112126	0.332149	0.104202	0.586016	0.138751	0.130453	0	0.242607	0.0633978	0.321398	0.0694117	0.0693503	0.241373	0	0.395021	0.23799	0	0	0	0	0
Unigene0000614	759	0.459812	0.202038	0.128524	0.380724	0.238883	0	0.159043	0	0	0.139043	0.109004	0.368401	0.318251	0.31797	0.0922242	0.429415	0.493953	0.155883	0	0	0	0	0
Unigene0000615	340	0.384924	0.451021	0.143456	0.485663	0	1.49951	0	0	0	0	0	0	0	0	0	0	0	0	Polynucleotidyl transferase, Ribonuclease H fold [Medicago truncatula]	0	0	GO:0005488//binding	0
Unigene0000616	311	0.420817	0.246539	0.313666	0.265475	1.02024	0.614752	0.58222	0	0	0	0	0	0	0.194003	0	0.261998	0	0.190217	polyprotein [Glycine max]	0	0	GO:0003676//nucleic acid binding;GO:0003824//catalytic activity	GO:0006259//DNA metabolic process
Unigene0000617	365	0	0	0.400891	0.339299	0.248373	1.0476	0.661444	0	0	0	0	0	0	0	0	0	0	0	0	0	0	0	0
Unigene0000618	216	0.807865	0.177485	2.48391	0.191117	0.629556	0	0	0.262718	0.711937	0.162861	0	1.29452	0.55915	1.67597	0.162033	0.188614	0	0.273877	0	0	0	0	0
Unigene0000619	533	0.736627	0.287706	0.457552	0.619607	0	0.119567	0.679439	0.425869	0.288515	0.198	0.103482	0.131152	0.679792	0.339596	0.328322	0.0764366	0	0.11099	Myosin0like protein [Medicago truncatula]	0	GO:0005777//peroxisome;GO:0032991//macromolecular complex;GO:0031967;GO:0043232;GO:0044428//nuclear part;GO:0016020//membrane	GO:0016773//phosphotransferase activity, alcohol group as acceptor;GO:0032550;GO:0016887//ATPase activity;GO:0003723//RNA binding;GO:0043168;GO:0016301//kinase activity	GO:0016570//histone modification;GO:0032787//monocarboxylic acid metabolic process;GO:0006974//response to DNA damage stimulus;GO:0006625//protein targeting to peroxisome;GO:0009154;GO:0044255//cellular lipid metabolic process;GO:0006260//DNA replication;GO:0035556//intracellular signal transduction;GO:0006412//translation;GO:0044767
Unigene0000620	1226	0.676076	0.594126	1.59135	1.04382	1.18311	1.45548	1.42769	0.231432	0.407651	1.14773	0.562358	1.48247	2.11802	1.82087	0.999158	0.764304	0.509666	0.940923	0	0	0	0	0
Unigene0000621	317	0.275235	0.241872	0.153864	0.651125	0.285981	0	0.3808	0	0	0	0.434985	0	0	0	0.220814	0.385559	0.295671	1.02639	Os05g0568600 [Oryza sativa Japonica Group]	0	0	0	0
Unigene0000622	501	0.17415	0	0.194711	1.15357	0	0.127204	0	0	0.0767358	0.210647	0.165138	0	0.120535	0	0.90816	0.569232	0.810685	0.885592	Os05g0568600 [Oryza sativa Japonica Group]	0	0	0	0
Unigene0000623	216	0	0.35497	0.22581	0	1.04926	0.590086	0	0	0	0.162861	0	0	0	0.279328	0	0.188614	0.289283	0	0	0	0	0	0
Unigene0000624	434	0.301553	0.265001	0.674309	0.380473	0.939982	0.293683	0.695355	0.261507	0.354328	0.162111	0.190632	1.28855	0.556573	0.278041	0.322572	0	0	0.0681538	Guanylyl cyclase [Medicago truncatula]	0	0	0	0
Unigene0000625	233	0	0	0.41867	0	0	0	0.518084	0	0.329997	0	0	0	0	0	0.150211	0	0	0	0	0	0	0	0
Unigene0000626	279	0.469083	1.37408	1.04893	0.739809	0.974796	1.1421	0	1.01697	0.137794	0.63043	0.296538	2.00442	1.08223	0.648761	0.376334	0.584096	0.559902	0.106017	0	0	0	0	0
Unigene0000627	225	0.581663	0.681543	0.867111	0.366945	1.20875	1.13297	1.87777	1.00884	1.19605	1.40712	0.735414	0	1.07357	0.536309	0.311103	0.724279	0.416567	1.31461	0	0	0	0	0
Unigene0000628	1142	0	0.0671397	0.597942	1.84356	0	0	0	0	0	4.49736	2.10095	0	0	0	0	0	1.39524	1.26914	copia0like retrotransposable element [Arabidopsis thaliana]	0	0	0	0
Unigene0000629	694	0.377159	0.883845	0.983934	0.297416	0.195942	0	0.173939	0.245305	0.166187	0.253444	0	0.201453	0	0.173876	0	0	0	0	copia0like retrotransposable element [Arabidopsis thaliana]	0	0	0	0
Unigene0000630	238	0	0	0.819748	0	0	0	0.2536	0	0	0	0	0	0	0	0	0	0	0	0	0	0	0	0
Unigene0000631	838	0.416465	0.594723	1.04767	0.837449	0.432726	0.988641	0.360124	0.270869	0.688149	0.755613	0.263275	1.08443	0.792685	0.791984	0.375885	0.2917	0.372823	0.317672	0	0	0	0	0
Unigene0000632	640	0.340818	0.419309	1.3718	0.967531	1.34568	1.2945	1.79184	1.77335	1.20139	1.53904	0.603269	1.20148	1.98149	0.754185	0.656233	1.01852	1.26923	0.878119	0	0	0	0	0
Unigene0000633	285	1.07148	0.403545	0.684562	0	0.477137	0.447223	0	0	0	0	0.19353	0.245278	0.847554	0	0.122804	0.14295	0	0	0	0	0	0	0
Unigene0000634	439	0.596237	0.785948	0.333314	0.658244	0.206506	1.01618	0.824922	0.387793	0.875731	0.480793	0.18846	0.159235	0.825351	1.51181	0.239174	0	0	0.0673776	0	0	0	0	0
Unigene0000635	1314	0.0663998	0	0	0	0.137985	0	0	0	0.117031	0	0.125927	0	0	0	0	0.12402	0	0.135063	Riboflavin biosynthesis protein ribBA [Medicago truncatula]	ko00740//Riboflavin metabolism	GO:0009536//plastid	GO:0003933//GTP cyclohydrolase activity;GO:0016830//carbon0carbon lyase activity	GO:0006771//riboflavin metabolic process;GO:0009451//RNA modification
Unigene0000636	1402	0	0	0.0695792	0.0588892	0.193986	0	0.086101	0.0809517	0	0.100365	0.078682	0.249301	0	0.0860696	0.0499274	0	0.0445685	0.126585	Riboflavin biosynthesis protein ribBA [Medicago truncatula]	ko00740//Riboflavin metabolism	0	0	0
Unigene0000637	408	0.106923	0.281888	0.239093	0.607078	1.99977	1.71819	0.591733	0.417258	0.376908	0.948427	0.743525	0.856668	0.740051	1.62667	0	0	0	0	0	0	0	0	0
Unigene0000638	273	0	0	0	2.2682	0	0	0	0	0	0.386571	0	0	0	0	0	0	0.572208	0	0	0	0	0	0
Unigene0000639	218	0.800453	0	0	0.378728	0	0	0.830598	0.260308	0.176351	0	0	0.320661	0	0	0	0	0	0	0	0	0	0	0
Unigene0000640	599	0	0	0.32571	0.344585	0.151346	0	0.604575	0	0.0641813	0	0.18416	0	0	0	0.350575	0	0.156473	0.148141	Cysteine0rich RLK (RECEPTOR0like protein kinase) 8 [Theobroma cacao]	0	0	GO:0005488//binding	GO:0008152//metabolic process
Unigene0000641	382	0.342602	0	0	0.324199	0	0	1.10601	0.148553	0.503202	0.092089	0.216581	0.182995	0	0.315889	0.0916206	0.319953	0.817867	0.232294	PREDICTED: probable WRKY transcription factor 480like [Glycine max]	0	0	GO:0003677//DNA binding;GO:0001071//nucleic acid binding transcription factor activity	GO:0006351//transcription, DNA0dependent
Unigene0000642	861	0.152002	0.267155	1.35958	1.24659	0.105292	0	0.701008	0.131817	0.80372	1.144	1.47339	0.324758	0	1.26135	0.325195	0.662451	1.81432	1.2711	WRKY transcription factor [Medicago truncatula]	0	GO:0043231//intracellular membrane0bounded organelle	GO:0001071//nucleic acid binding transcription factor activity;GO:0003677//DNA binding	GO:0006952//defense response;GO:0051707//response to other organism;GO:0010243//response to organic nitrogen;GO:0046942//carboxylic acid transport;GO:0007165//signal transduction;GO:0002252;GO:0006351//transcription, DNA0dependent;GO:0006812//cation transport
Unigene0000643	441	0.296767	0.347726	0.774207	0.0936084	0.719492	0.578043	0.547454	0	0.087176	0	0.12507	0.634051	0.273869	0.273627	0	0.0923826	0	0.067072	0	0	0	0	0
Unigene0000644	937	1.35018	0.695545	0.832871	0.660854	1.06427	1.22426	0.901809	1.09013	0.615442	0.488062	0.735807	1.04446	0.708933	0.965872	0.747046	0.826119	0.53349	0.315675	0	0	0	0	0
Unigene0000645	258	0.169088	0	0.378101	0	0.35138	0.494026	0.935764	0.21995	0	0	0	0.270946	0.234063	0	0	0.15791	0	0.343939	PREDICTED: protein FAR10RELATED SEQUENCE 80like [Solanum lycopersicum]	0	0	0	0
Unigene0000646	361	0.362532	0.106196	0.135111	1.02917	0.878937	0.353071	0.334387	0	0.106495	0	0	0	0	0	0	0	0.432722	0	0	0	0	0	0
Unigene0000647	467	0.18683	0.738825	0.731103	0.176794	0.582373	0.409396	0.129244	0.121514	0.411613	0.225983	0	0.299375	0.258622	0.516786	0.82439	0.261718	0.401403	0.126676	0	0	0	0	0
Unigene0000648	615	0.851214	0.935044	0.079309	0.268496	0.294816	0.103625	0.294423	0.922717	0.875162	0.572	0.179369	1.02299	0.392769	0.196211	0.967454	0.596206	0.203203	0.144287	0	0	0	0	0
Unigene0000649	1080	0.686685	0.177485	0.632269	0.764469	0.629556	0.531077	0.782403	0.735611	0.711937	0.846878	0.740521	1.16507	0.838725	1.06145	0.486098	0.26406	0.578565	0.547755	Histone deacetylase [Medicago truncatula]	0	0	0	GO:0044238//primary metabolic process;GO:0044260
Unigene0000650	578	0.301901	0.663266	0.506315	0.928473	0.392111	0.330775	0.208847	0	0.133026	0.121723	0.286277	0.362824	0	0	0.181656	0.140971	0.216211	0.35822	Histone deacetylase [Medicago truncatula]	0	0	GO:0005488//binding	GO:0044260;GO:0044699;GO:0044238//primary metabolic process
Unigene0000651	381	0.687003	1.20746	1.66424	1.19185	1.90354	2.17449	1.26733	1.19154	0.90814	1.2003	1.08575	1.10085	1.74349	1.42523	0.918611	1.3901	0.410007	1.00925	0	0	0	0	0
Unigene0000652	265	0	0.578668	1.10434	0.467336	0	0.721464	0	0.42828	0.580296	0.530989	0.416272	0.263789	1.1394	0.227679	0.528288	0	0.117896	0.223236	0	0	0	0	0
Unigene0000653	232	0	0	1.89213	0.711747	0	0	0.260159	0	0	0.151629	0	0	0	0	0	0	0	0	0	0	0	0	0
Unigene0000654	747	0.350399	0.718494	0.783534	0.663154	0.728161	0.170627	0.484793	0.4558	0.411723	0.470924	0.147674	0.18716	0.727569	0.969234	0.32797	0.545391	0.334592	0.277177	0	0	0	0	0
Unigene0000655	737	0	0	0	0.336076	0	0	0	0	0	0	0.0748386	0	0	0	0	0	0	0	PREDICTED: boron transporter 40like [Cicer arietinum]	0	GO:0031224//intrinsic to membrane	GO:0015103//inorganic anion transmembrane transporter activity;GO:0015301//anion:anion antiporter activity	GO:0006820//anion transport
Unigene0000656	1094	0	0.0350428	0.312089	2.15086	0	0	0	0	0	0.514486	4.13418	0	0	0	0	0	0.314139	2.05483	PREDICTED: boron transporter 40like [Cicer arietinum]	0	0	0	0
Unigene0000657	926	1.08355	0.786608	1.00078	1.02535	0.930057	1.30762	0.651801	0	0	0	0	0	0	0	0	0	0	0	0	0	0	0	0
Unigene0000658	269	0	0.142516	0.725279	0.460387	0	0.947647	0.673124	0.421912	0.42875	0.39232	0	0.7796	0.673474	1.12146	0.260216	0.151452	0	0	0	0	0	0	0
Unigene0000659	318	0	0	0.460142	0.519262	0.142541	1.00203	0.569404	0	0	0.663736	0.26017	0	0.1899	0.569196	0	0	0	0	0	0	0	0	0
Unigene0000660	212	0	0	0	1.16834	0	0	0	0	0	0.497802	1.95128	0	0	0	0.16509	0	0	0.837135	E3 ubiquitin0protein ligase RNF181 [Medicago truncatula]	0	0	GO:0046872//metal ion binding	0
Unigene0000661	281	0	0	0.347153	2.64436	0	0	0	0.403894	0	0	2.74799	0	0	0	0	0	0	3.99997	DELLA protein GAI [Medicago truncatula]	0	0	0	GO:0006351//transcription, DNA0dependent
Unigene0000662	219	0	0.875269	0	0.376998	0	0.582003	0.551204	0.259119	0	0	0.125927	0	0.275745	0.275501	0	0	0.14266	0	0	0	0	0	0
Unigene0000663	382	0	0	0	1.72906	0	0	0	0	0	4.88072	1.58826	0	0	0	0	0	0	0.464588	0	0	0	0	0
Unigene0000664	263	0	0	0	1.25571	0	0	0	0	0	1.73884	0.838875	0	0	0	0	0	0	0	0	0	0	0	0
Unigene0000665	202	0.863855	0.569358	0.24146	0	0.673188	0.630983	0	0.280926	0.38064	0.522446	0.5461	0	0.298951	0.298687	0	0	0.154666	0	0	0	0	0	0
Unigene0000666	239	0.36506	0	0	0.172725	0	0	0	0	0	0	0	0	0	0	0	0.170463	0	0	0	0	0	0	0
Unigene0000667	751	0.116178	0	1.49378	1.26427	0.362141	0	0.321474	0.604497	0.511912	1.07736	0.918044	0.186163	0.160821	0.160679	0.512636	1.03072	0.790424	0.47263	PREDICTED: H/ACA ribonucleoprotein complex non0core subunit NAF10like [Cicer arietinum]	0	0	0	0
Unigene0000668	468	0.652506	0.163832	0.41688	0.44104	0.968548	0.680868	0	0.242509	0	0.300667	0.23571	0	0.645173	1.03136	0	0	0.333788	0.126405	0	0	0	0	0
Unigene0000669	1297	0.672702	0.472929	0.37606	1.43227	0.698967	0.884447	0.465357	0.17501	0.296412	0.488207	0.382733	1.07794	1.25712	0.651262	0.377785	0.282703	0.361325	0.273666	0	0	0	0	0
Unigene0000670	567	0.538577	0.811361	1.37637	1.23771	1.03927	1.23637	0.958044	1.60133	0.678035	0.930635	0.778216	1.47945	2.2366	2.23462	1.29626	0.502972	0.495913	0.469504	0	0	0	0	0
Unigene0000671	298	0.585566	0	0	0.415584	0.60843	0.427713	0	0	0.129009	0.236094	0	0	0.40529	0.202466	0.117447	0	0	0.0992576	0	0	0	0	0
Unigene0000672	216	0	0.177485	0.22581	0.764469	0.209852	0.295043	0	0	0	0	0	0	0	0	0.162033	0.188614	0	0	0	0	0	0	0
Unigene0000673	1132	0.809292	0.94826	0.732487	0.656417	0.560594	1.23856	1.49292	0	0	0	0	0	0	0	0.494687	0.899751	0.193196	0.391945	0	0	0	0	0
Unigene0000674	705	0.680669	0.870055	1.66043	1.34677	0.25718	0.813565	0	1.28788	2.18125	3.79224	2.66001	0.793238	0.770913	0.427906	2.18434	1.56028	2.43736	2.22365	MYB transcription factor [Medicago truncatula]	0	0	GO:0005488//binding	0
Unigene0000675	1126	0.309945	0.476656	0.996292	0.439943	1.16742	0.905567	0.857645	0.705559	0.921851	0.59359	0.391873	0.496654	0.643569	0.643	0.341909	0.325636	0.693662	0.23642	0	0	0	0	0
Unigene0000676	223	0.391253	0.171914	0.437444	0.92559	0.406529	1.14313	0	0.254471	0.172397	0.630996	0.371005	0	0	0	0.156947	0	0.140101	0.530561	0	0	0	0	0
Unigene0000677	516	0.760896	0.817257	1.03978	0.240008	0.966295	0.370519	1.16971	0.109975	0.59604	0.545395	0.534458	0.406419	0.702188	0.467712	0.135655	0.15791	0.423833	0.0573232	0	0	0	0	0
Unigene0000678	221	0	0	0.220701	0	1.23063	0.576736	0.546215	1.0271	0.173958	0.159176	0.49915	0	0	0	0.158367	0.368694	0	0.401522	0	0	0	0	0
Unigene0000679	935	0.653204	0.164008	0.938984	0.618116	0.872625	1.22687	1.29105	0.667613	0.246703	0.150494	0.6194	0.672874	0.645863	1.41964	0.262025	0.174292	0.267316	0.347985	0	0	0	0	0
Unigene0000680	306	0	0.375851	0.637582	0.269813	0.592523	1.66613	0	0.556344	0.62818	0.574804	0.720994	0.685334	0.986735	0.591518	0.228752	0.266279	0.1021	0.289988	0	0	0	0	0
Unigene0000681	932	0.18723	0.493607	0.732672	0.752986	0.972704	0.547033	0.906647	0.4871	0.329997	0.150979	0.443852	0.750044	0.842325	0.517895	0.300421	0.262279	0.301698	0.349106	0	0	0	0	0
Unigene0000682	733	0.952244	0.836819	0.931583	0.67582	0.618391	0.956374	0.329369	0.541923	0.524483	0.383935	0.413859	1.23977	0.32954	0.576185	0.477477	0.333485	0.426228	0.524589	0	0	0	0	0
Unigene0000683	280	0.311605	0.273834	0.348393	0.147433	0.161886	0.682814	0.86224	0.405336	0	0.251271	0	0.249657	0.431344	0.646444	0	0.58201	0.223161	0.211277	0	0	0	0	0
Unigene0000684	955	0.274082	0.0802865	0.30644	0.086453	0	0.133464	0.0632008	0.237684	0	0.0368356	0	0.219594	0	0	0.0366483	0.0853209	0.327147	0.0309725	PREDICTED: sulfiredoxin, chloroplastic/mitochondrial0like [Fragaria vesca subsp. vesca]	0	0	0	0
Unigene0000685	817	0.106792	0	0	0.202112	0.110962	0.312016	0	0	0	0	0	0	0	0	0	0	0	0	0	0	0	0	0
Unigene0000686	247	0.706473	0.15521	0.19747	0	0.367029	0.516027	0.488719	0	0	0	0	0	0	0	0	0	0	0	Integrase, catalytic region; Zinc finger, CCHC0type; Peptidase aspartic, catalytic [Medicago truncatula]	0	0	0	0
Unigene0000687	343	0.254371	0.223538	0.995408	0.722122	1.05721	0	0.879837	0	0.112083	0.307679	0.562817	0.407604	0.528177	0.703613	0.102038	0.237555	0.182172	0.0862355	0	0	0	0	0
Unigene0000688	334	0.391839	0.114781	0.876198	0.494387	0.678563	0.381613	0	0.339803	0.575518	0.63194	0.165138	0	0.723212	1.08386	0.314363	1.21978	0.374162	0.531355	0	0	0	0	0
Unigene0000689	283	0	0.135466	0.51705	0	0.16017	0	0	0.40104	0	0	0.292347	0	0.426772	0	0	0	0.220795	0	0	0	0	0	0
Unigene0000690	265	1.48159	0.144667	0.368113	0.155779	0.342098	0.480976	0	0	0.290148	0.92923	0	0	0	0	0.132072	0.153739	0	0	0	0	0	0	0
Unigene0000691	349	0.999993	0.549238	0.559026	0.354854	1.16892	1.46084	0	0	0	0	0.0790201	0	0	0	0	0	0	0	0	0	0	0	0
Unigene0000692	336	0.519342	0.684585	0.290327	0.614305	0.26981	0.569012	0.359267	0.506671	0.228837	0.314089	0.65662	0	0	0.538704	0.312492	0.606261	0.464919	0.44016	PREDICTED: uncharacterized protein LOC100797246 [Glycine max]	0	0	0	0
Unigene0000693	531	0.246467	0.288789	1.01041	0	0.512181	0.600087	0.340999	0.427474	0	0.132497	0	0.789877	0.341176	0.340875	0.856851	0	0.41186	0.445631	PREDICTED: uncharacterized protein LOC101499749 [Cicer arietinum]	0	GO:0009507//chloroplast	0	0
Unigene0000694	354	0.369701	0.433184	0.688913	0.233228	0.512181	0.900131	0	0.320605	0.434402	0	0.155808	0.592408	1.02353	0.340875	0.197735	0.115087	0.0882557	0.334223	PREDICTED: uncharacterized protein LOC101502536 [Cicer arietinum]	0	0	0	0
Unigene0000695	391	0.557861	1.17658	1.74642	0.739052	0.811499	1.95589	1.23492	1.3062	0.884914	1.25957	2.04543	2.86053	1.23556	1.08016	1.07414	0.625177	0.719138	1.58863	0	0	0	0	0
Unigene0000696	370	0.471618	0.414452	0.395473	1.22728	1.34759	0.516724	0.978759	0.920223	1.14295	0.475378	0.521747	0.18893	0.326423	0.652268	0.567553	0.33033	0.253318	0.639541	0	0	0	0	0
Unigene0000697	1507	0.115792	0	0	0	0	0.0845777	0	0	0.0510214	0	0.0365999	0	0	0	0	0	0.0414632	0.0785103	Pentatricopeptide repeat0containing protein [Medicago truncatula]	0	0	0	GO:0050896//response to stimulus
Unigene0000698	1592	0.0548049	0.0963236	0.0612751	0.051861	0.0569448	0.160124	0	0.0712903	0.193189	0.154677	0.173229	0.219548	0.151729	0	0.175875	0.102364	0.0392494	0	Pentatricopeptide repeat0containing protein [Medicago truncatula]	0	0	0	GO:0010033//response to organic substance;GO:0006950//response to stress;GO:1901700
Unigene0000699	260	1.00672	0.147449	0.562789	0.635097	0.348677	0	0	0.218258	0.147864	0.6765	0.424277	0.268862	0	0	0.269224	0.156695	0.120164	0	0	0	0	0	0
Unigene0000700	236	0.18485	0.974664	0.206674	0.874604	0.768272	0.270039	0.255749	1.68318	1.14031	0.894356	1.16856	0	0.511764	0.511312	0.444904	1.89893	1.32384	0.125334	0	0	0	0	0
Unigene0000701	314	1.25039	1.34301	1.24268	0.657346	1.0105	0.405919	0.576657	0	0.122435	0.112032	0.263484	1.11312	0.769276	0.960745	1.56047	0.908232	1.59198	0.753599	0	0	0	0	0
Unigene0000702	1197	0.801791	0.512438	0.733459	0.413848	1.17391	0.585649	1.71439	0.758524	1.2847	0.617158	0.483825	0.467195	0.504496	1.41134	1.22804	2.00811	1.07013	0.32124	PREDICTED: RNA0binding protein 380like isoform X1 [Cicer arietinum]	0	0	0	0
Unigene0000703	591	0.369075	0.518941	0.742767	1.04775	0.766972	0.323499	0.408506	0.384075	0.585451	0.476183	0.513297	0.591405	0.613078	0.714625	0	0.275741	0.158592	0.350341	0	0	0	0	0
Unigene0000704	361	0.725064	0.53098	0.135111	0.343058	0.251125	0.529606	1.17035	0	0	0	0	0	0	0	0.0969504	0	0	0.327742	RNA0directed DNA polymerase (Reverse transcriptase) [Medicago truncatula]	0	0	GO:0097159;GO:1901363;GO:0016787//hydrolase activity	0
Unigene0000705	355	0.491546	0	0.824366	0.581427	0.383054	0.359038	0.850096	0.319702	0.324884	0.297279	0.310738	0.196913	0.340215	0.339914	0.098589	0.918101	0.176014	0.166641	0	0	0	0	0
Unigene0000706	359	0	0	3.94004	0.22998	0	0	0	0.47421	1.39214	2.44972	0.614552	0	0	0	0	0	0.435133	0	CCP [Medicago truncatula]	0	0	0	0
Unigene0000707	370	0.353714	0	1.71372	0.446285	0.122508	0.172241	0.652506	0	0.415617	0.285227	0.298141	0.18893	0.163211	0.652268	0.0945921	0.11011	0.253318	0.0799426	0	0	0	0	0
Unigene0000708	503	0.520374	0.0762163	0.969682	0.410351	0.270346	0.253397	0.599968	0.225635	0.305723	0.139873	0.274135	0.416923	0	0.2399	0.0695807	0.566968	0	0.235219	LCR0like protein [Medicago truncatula]	ko04075//Plant hormone signal transduction;ko04626//Plant0pathogen interaction	GO:0031224//intrinsic to membrane	GO:0004672//protein kinase activity;GO:0032550	GO:0006796//phosphate0containing compound metabolic process;GO:0006464//protein modification process
Unigene0000709	505	0.172771	0.227743	0.579505	0.16349	0.628309	0.883376	0.836629	0.337112	0.989663	1.11455	0.764539	0.968968	1.79371	1.67265	0.415831	0.403373	0.371198	0.585718	0	0	0	0	0
Unigene0000710	386	0	0	0.505441	0.213893	0.587151	0.330204	1.40728	0.294026	0.597585	1.73156	1.00024	1.44879	2.19025	0.937847	0	0.105546	0	0	0	0	0	0	0
Unigene0000711	272	0.160385	0	0.17932	0.303539	0.166647	0	0.8876	0.208629	0.282681	0.258662	0.10139	0	0	0	0.128673	0.149782	0	0	0	0	0	0	0
Unigene0000712	545	0.320181	0	0	0	0.166341	0	0	0	0	0	0.303611	0	0	0	0	0	0	0.108546	0	0	0	0	0
Unigene0000713	681	0.384359	0.225179	0.716226	1.09114	0.532488	0.748655	0.354519	0	0.338719	0.723189	0.971913	0.821193	0.177352	0.265792	0.154181	0	0.275265	0.651515	0	0	0	0	0
Unigene0000714	601	0.362934	0.127577	0.405782	0.274751	0.150842	0.84831	1.50641	0.188842	0.255871	0.351195	0.458869	0	0.703357	0.903516	0.232939	0.271153	0.207937	0.0492159	0	0	0	0	0
Unigene0000715	529	0.90713	0.869644	1.01423	1.01447	0.942549	1.56613	1.36915	0.42909	0.436045	0.398994	0.312794	1.05715	1.0274	0.684327	0.132322	0.693131	0.354358	0.335487	0	0	0	0	0
Unigene0000716	490	0	0	0	0.252743	0	0	0	0	0	0	0	0	0	0	0	0	0	0	PREDICTED: transcription initiation factor TFIID subunit 30like isoform X1 [Cicer arietinum]	0	0	0	0
Unigene0000717	592	0	0	0	1.25518	0	0	0	0	0.454582	0	0.279507	0	0	0	0	0	0.0527746	0.249821	PREDICTED: transcription initiation factor TFIID subunit 30like isoform X2 [Cicer arietinum]	0	0	0	0
Unigene0000718	369	0.236448	0.311681	0.528726	0.447494	0.737041	1.38166	0	0.615145	1.25023	0.572	0.373686	0.568326	0.163654	0.654036	0.569091	0.883267	0.508009	0.400796	0	0	0	0	0
Unigene0000719	464	0	0	0	2.49111	0	0	0	0	0	0	0	0	0	0	0	0	0	0	0	0	0	0	0
Unigene0000720	348	0	0	0	0.237249	0	0	0	0	0	0	0	0	0	0	0	0	0	0	0	0	0	0	0
Unigene0000721	699	0	0	0	0	1.23209	1.36758	0.172695	0	0	0	0	0.500029	1.29588	0.172632	0	0	0	0.0846316	0	0	0	0	0
Unigene0000722	377	0.231431	0.406756	0.38813	0.437998	0.240467	0	0.64039	0.301046	0.611851	0	0.0731513	0.370844	0	0.960236	0.0928358	0.432262	0.248614	0.0784582	0	0	0	0	0
Unigene0000723	397	0	0.0965662	0.491436	0	0.228353	0.160527	0.152032	0	0	0	0	0	0	0	0.0881589	0	0.0786966	0	0	0	0	0	0
Unigene0000724	229	0.190501	0	0	0	0	0.834882	1.5814	0	0	0	0	0.305258	0	0	0	0	0	0.129165	0	0	0	0	0
Unigene0000725	258	0	0.148592	0.18905	0.32001	0.70276	0	0	0	0	0	0	0	0	0	0.271311	0.15791	0.121095	0	0	0	0	0	0
Unigene0000726	388	0.337304	0.790449	0.502835	0.319186	1.28507	0.492752	0.466676	0.146255	0.49542	0	0	0	0	0.155502	0.270612	0.210004	0.161044	0.0762339	0	0	0	0	0
Unigene0000727	535	0.163083	0.143315	0.547009	0.925936	0.0847253	1.1912	0.451266	0.212139	0.143718	0.131507	0.206191	0.261324	0.338625	0.225551	0.196257	0.91381	0.408781	0.22115	0	0	0	0	0
Unigene0000728	437	0.598966	0.263182	0.892906	0.0944653	1.03725	0.583334	1.10493	0.779137	0.703792	0.321995	0.315538	0.639854	0.552752	0.828395	0.400447	0.372913	0.643439	0.135372	0	0	0	0	0
Unigene0000729	418	0.313096	0.275144	1.40024	0.790073	0.650642	0.60985	0.288788	0	0.367891	0.0841579	0.131952	0.167235	0.144469	0.433025	0	0.389863	0.373715	0.212288	0	0	0	0	0
Unigene0000730	706	0.0617914	0.705918	0.690864	0.935554	0.128408	0.270804	2.05179	0.160757	0.0544541	0.398618	0.0781247	0.0990143	0.59875	0.854601	0.0991476	0.288532	0.0885058	0.251378	polyprotein [Ananas comosus]	0	GO:0005622//intracellular	GO:1901363;GO:0016772//transferase activity, transferring phosphorus0containing groups;GO:0097159	GO:0044260;GO:0044238//primary metabolic process
Unigene0000731	799	0.873586	1.0076	0.24418	1.18832	0.850964	1.59523	0.604323	0.355113	0.914202	0.616386	0.345157	0.0874895	0.755797	0.755129	0.96368	0.764844	0.664735	0.370197	0	0	0	0	0
Unigene0000732	747	0.1168	0	0.130589	0.828942	0.12136	0.170627	0.161598	0.151933	0	0.329647	0.258429	0	0	0.484617	0	0.109078	0.125472	0.871128	Transcription factor NAI1 [Medicago truncatula]	0	0	0	0
Unigene0000733	783	0	0	0	0.210888	0	0	0	0.144948	0	0	0.176105	0	0	0.0770559	0	0	0	0	Transcription factor NAI1 [Medicago truncatula]	0	0	0	0
Unigene0000734	1576	0.110723	0.243254	0.154743	0.0785812	0.172569	0.161749	0.15319	0.180035	0.0975752	0.0892843	0.0874937	0.310488	0.651396	0.229701	0.532981	0.568716	0.158592	0.168914	Histone deacetylase [Medicago truncatula]	0	GO:0043231//intracellular membrane0bounded organelle	GO:0003676//nucleic acid binding	GO:0006259//DNA metabolic process
Unigene0000735	1388	0.0628598	0	0.070281	0	0	0	0	0	0	0	0	0	0	0	0	0	0	0	gag/pol [Oryza sativa Japonica Group]	0	GO:0043231//intracellular membrane0bounded organelle	GO:0003676//nucleic acid binding	GO:0006259//DNA metabolic process
Unigene0000736	230	1.13804	0	0.424131	0.717936	0.197078	0.277084	0	0	0.16715	0.152948	0	0	0	0.786976	0.30434	0	0	0.128603	ty10copia retrotransposon protein [Cucumis melo subsp. melo]	0	0	GO:0046914//transition metal ion binding;GO:0016298//lipase activity;GO:0097159	GO:0006259//DNA metabolic process
Unigene0000737	222	0	0.172688	0.659122	0.185952	1.0209	0.574138	0.815632	1.02247	0.173174	0	0	0.314883	0.544038	0	0	0.367033	0	0.133238	Cytokinin0O0glucosyltransferase [Medicago truncatula]	0	0	GO:0035251//UDP0glucosyltransferase activity	0
Unigene0000738	222	0.196508	0	0.439415	0.185952	0.612541	0.287069	0	0	0	0	0	0	0	0	0	0.55055	0.281464	0.532951	Cytokinin0O0glucosyltransferase [Medicago truncatula]	0	0	GO:0035251//UDP0glucosyltransferase activity	0
Unigene0000739	908	0.912852	1.26663	1.45036	0.727424	1.14818	0.772051	0.997083	1.24994	0.550418	0.50365	0.789679	1.07782	0.997602	0.863824	0.385453	0.942241	0.412897	0.260606	0	0	0	0	0
Unigene0000740	649	0.604965	0.590705	0.751541	0.318038	0.698429	0.392785	0.185999	0.524627	0.118473	0.16261	0.509917	0.430842	0.0930481	0.278897	0.107855	0.188324	0	0.0455759	0	0	0	0	0
Unigene0000741	420	0	0	0.348393	2.26064	1.51093	0.455209	0	0	0	0	0	0	0	0	0	0	0.297548	0.211277	non0ltr retroelement reverse transcriptase [Rosa rugosa]	0	0	GO:0003676//nucleic acid binding;GO:0034061	GO:0006260//DNA replication
Unigene0000742	325	0.939609	0.589797	0.300154	0.254039	0.278942	0.19609	0	0	0	0	0	0	0	0.185646	0.323069	0.62678	0.192262	0.182023	0	0	0	0	0
Unigene0000743	334	1.17552	1.72171	0.876198	0.247194	0.407138	0.572419	0.361418	0.509705	0.920829	0.737264	0.908258	0.209294	0.180803	0	1.25745	1.34176	0.280622	0.265677	0	0	0	0	0
Unigene0000744	281	0.155248	0	0	0.440726	0.483929	0	0.644379	0.201947	0	0	0	0.248769	0	0	0.249104	0.434954	0.111183	0.315787	0	0	0	0	0
Unigene0000745	266	0	0	0.550094	0.155193	0.511218	0	0.680716	0	0	0	0	0.788392	0	0	0	0	0	0	Cysteine0rich RLK (RECEPTOR0like protein kinase) 8 [Theobroma cacao]	0	0	GO:0004553//hydrolase activity, hydrolyzing O0glycosyl compounds;GO:0046914//transition metal ion binding;GO:0097159	GO:0006259//DNA metabolic process
Unigene0000746	300	0.436247	0.638946	0.650334	0.688022	0.755467	0	0.201189	1.13494	1.40964	0.23452	0.367707	0.233014	0	0	0	0	0.104142	0	0	0	0	0	0
Unigene0000747	355	0.122886	0.323973	0	1.04657	0	0	0	0	0	0	0.310738	0.196913	0	0	0	0	0	0	F0box/kelch0repeat protein [Medicago truncatula]	0	0	0	0
Unigene0000748	267	0.98033	0	0.365356	0.154612	0.169768	0.477373	0.452111	0	0	0	0	0	0	0	0	0	0	0	0	0	0	0	0
Unigene0000749	251	0	0.305472	0.388646	0	0.722359	0.253902	0.480931	0.226084	0	0	0	0	0	1.20189	0	0	0.124472	0.117844	0	0	0	0	0
Unigene0000750	883	0.345836	0.824914	0.828568	1.07528	0.359339	0.144347	0.751897	0.321331	0.174155	0.239035	0.218625	0.949999	0.341949	0.273317	0.911641	0.968918	0.424587	0.16749	Protein FAM38B [Medicago truncatula]	0	0	0	0
Unigene0000751	493	1.15035	0.0777622	0	0.753614	0.55166	0.904878	0.734565	0.920846	0.857791	0.071355	0.335635	0	0.367474	0.122383	0	0	0.253489	0.299987	0	0	0	0	0
Unigene0000752	298	0.439175	0.257294	0.163675	0.554112	1.06475	0.427713	0.405079	0.57128	0	0.708282	0.277631	0	0.81058	0.809863	0.117447	0.136714	0.524204	0.496288	0	0	0	0	0
Unigene0000753	491	0.177697	0.078079	0.198676	0.588532	0.646224	0.648974	0.245852	0	0.469792	1.07468	0.224668	0.284742	0.737941	0.86017	0.285125	0	0.636304	0.120484	0	0	0	0	0
Unigene0000754	302	0.288905	0.253886	0.161507	0.546773	0.600371	1.05512	0	0.187904	0.1273	0	0.365272	1.62029	1.59969	0.399568	0	0	0.413808	0.6856	PREDICTED: uncharacterized mitochondrial protein AtMg008100like [Cicer arietinum]	0	0	0	0
Unigene0000755	1072	0	0	0	0.0770174	1.14166	0.713388	0	0	0	0.131261	0.0257258	0.782509	0.844984	0.112565	0	0	0	0	F0box protein [Medicago truncatula]	0	0	0	0
Unigene0000756	1324	0.0988475	0.0579106	0.331552	0.187075	0.136943	0.481339	0.27352	0.171441	0.116147	0.212556	0.249952	0	0.319273	0.455701	0.18504	0.184626	0.0943883	0.134043	F0box protein [Medicago truncatula]	0	0	0	0
Unigene0000757	254	0	0	0.192028	0.162525	0.178457	0	0.47525	0	0.302713	0	0	0	0.237749	0	0	0.160397	0	0.232904	0	0	0	0	0
Unigene0000758	1046	0.667299	0.0733017	0.69945	0.631454	0.173339	0.609267	0.346215	0.217006	0.367539	0.302679	0.369113	0.868789	0.46186	0.346089	0.20076	0.233694	0.20908	0.452448	0	0	0	0	0
Unigene0000759	612	0.285129	0.876985	0.71728	1.07925	0.888785	1.97852	1.47933	0.649068	0.376908	0.402363	0.225311	0.799557	0.789388	0.78869	0.171564	0.532558	0.2042	0.0966626	0	0	0	0	0
Unigene0000760	382	0.456803	0.903223	0.255367	0.86453	0.474639	0	0.316004	2.37684	1.61025	0.736712	0.505357	0.36599	0.158084	0.315889	0.0916206	0.853209	0.49072	1.08404	0	0	0	0	0
Unigene0000761	260	0	0	0.375192	0	0.174339	0	0	0	0	0	0.212139	0	0	0	0	0.31339	0	0	0	0	0	0	0
Unigene0000762	1016	0.729941	0.226398	0.528076	0.893887	0.356914	1.12906	0.415844	0.558535	0.605427	0.761728	0.4343	0.550426	0.832121	0.593846	0.654511	0.561388	0.492008	0.698711	0	0	0	0	0
Unigene0000763	252	0	0	0.387103	0.32763	0.719492	0	0	0.225187	0	0.139595	0	0	0	0.239424	0	0.161669	0	0.117376	0	0	0	0	0
Unigene0000764	329	0.397794	0.349576	1.18602	0.627376	1.23998	1.74335	0.917276	0.689934	0.116853	0.53462	1.00589	1.27485	1.46841	1.10033	0	0.866824	0.189924	0.71924	0	0	0	0	0
Unigene0000765	447	0.292783	0.257294	0.327349	0.277056	0.912645	0.570284	1.62032	0.126951	0	0.157396	0.246783	1.40746	1.35097	1.88968	0	0.182285	0.209681	0.794061	0	0	0	0	0
Unigene0000766	350	0	0	0	0.235893	0.518035	0.546251	1.72448	0	0	0	0	0.599178	0.345075	0.861926	0	0.232804	0	0.0845107	0	0	0	0	0
Unigene0000767	390	0.447433	1.37619	0.250128	0.423398	0.581129	0.490225	0.464283	0.291011	0.394304	0.1804	1.06069	1.61317	2.47746	2.01116	0.0897413	0.208927	0	0.303372	Serine/threonine protein kinase [Medicago truncatula]	0	0	GO:0004672//protein kinase activity;GO:0032550	GO:0006796//phosphate0containing compound metabolic process;GO:0006464//protein modification process
Unigene0000768	795	0.768234	1.59134	2.39274	3.47906	0	0.160325	0.607364	2.92658	3.19163	3.09743	4.2321	0.879297	2.12688	1.97321	1.32072	1.94735	2.79021	2.79045	expressed protein [Oryza sativa Japonica Group]	0	0	0	0
Unigene0000769	671	0	0	0	2.89154	0	0	0	0	0	0	1.5618	0	0	0	0	0	0.0931223	1.54286	PREDICTED: F0box/kelch0repeat protein At3g238800like [Cicer arietinum]	0	0	0	0
Unigene0000770	652	0	0	0	1.89945	0	0	0	0	0	0.161862	0.592166	0	0	0	0	0	0.095836	1.58782	PREDICTED: F0box/kelch0repeat protein At3g238800like [Cicer arietinum]	0	0	0	0
Unigene0000771	291	0.449739	0.790449	0.167612	0.425581	0.155766	0.657003	0	0	0	0	0	0	0	0	0	0.140002	0	0	0	0	0	0	0
Unigene0000772	213	0.204811	0	0	0.193809	0.851231	0.897596	0.56673	0	0.180491	0.495465	0.129474	0	0	0.283262	0	0	0.440036	0	0	0	0	0	0
Unigene0000773	388	0	0	0	0	3.38792	1.47826	0.777794	0	0	0	0	0	0	0	0	0	0	0	ATPase 11, plasma membrane0type [Aegilops tauschii]	ko00190//Oxidative phosphorylation	GO:0031224//intrinsic to membrane	GO:0032550;GO:0017111//nucleoside0triphosphatase activity;GO:0043169//cation binding;GO:0008324//cation transmembrane transporter activity	GO:0009152//purine ribonucleotide biosynthetic process;GO:0009154;GO:0006811//ion transport
Unigene0000774	228	0.765346	0.672575	0.427851	0.543175	0	0.838543	0	0	0	0	0	0	0	0	0	0	0	0	0	0	0	0	0
Unigene0000775	713	0	0.698988	1.7102	1.44745	0.127147	0.625673	0	0.318357	0.323517	0.937422	0.34811	0.196084	0.169392	0.084621	0.196348	0.399979	0.262911	0.497819	PREDICTED: myosin0H heavy chain0like [Cicer arietinum]	0	GO:0031224//intrinsic to membrane;GO:0043231//intracellular membrane0bounded organelle;GO:0015629//actin cytoskeleton	GO:0008092//cytoskeletal protein binding;GO:0017111//nucleoside0triphosphatase activity;GO:0032550;GO:0004672//protein kinase activity;GO:0060089	GO:0010208//pollen wall assembly;GO:0051640//organelle localization;GO:0007010//cytoskeleton organization;GO:0006464//protein modification process;GO:0006928//cellular component movement;GO:0007154//cell communication
Unigene0000776	366	0.238386	0	1.06612	0.225581	0	0	0.329819	0.155047	0	0.288344	0	0	0	0	0	0	0.426811	0.0808163	0	0	0	0	0
Unigene0000777	508	0.171751	0.679195	1.24818	1.3002	0.981512	0.501805	0.47525	0	0.302713	0	0.162862	0.412819	0	0	0.137792	0	0.0615011	0.116452	0	0	0	0	0
Unigene0000778	842	0	0.0910612	0.868914	3.48097	0.646005	0.605504	0.716826	0.269582	0.730539	5.26417	2.55473	0.332086	0.14344	0.931535	0.415666	0.193543	2.00368	2.00236	Os02g0292800 [Oryza sativa Japonica Group]	0	GO:0044464//cell part;GO:0016020//membrane	0	0
Unigene0000779	981	0.444696	0.742507	0.298318	1.26243	0.739295	0.389782	0.738309	0	0.0783784	0.609609	0.506019	0.926354	0.55402	0.55353	0.285416	0.456828	0.509562	0.572881	PREDICTED: amino acid permease 80like [Glycine max]	0	0	GO:0046914//transition metal ion binding;GO:0016787//hydrolase activity;GO:1901363;GO:0097159	GO:0006259//DNA metabolic process
Unigene0000780	277	0.15749	0.2768	0.176083	0.14903	0.327278	1.15035	0	0	0.138789	0	0	0	0	0.217815	0.12635	0	0.338367	0.106783	0	0	0	0	0
Unigene0000781	926	0.282665	0.414004	1.00078	0.579543	0.930057	1.8582	0.977702	0.428974	0.415169	0.341903	0.0893457	0.603923	0.391284	0.325782	0.226776	0.395968	0.202435	0.38331	IMP dehydrogenase/GMP reductase, putative [Medicago truncatula]	0	0	0	0
Unigene0000782	598	0.583608	0.128217	0.489381	0.414194	1.21279	1.06571	2.32141	0.379579	0.0642886	0.176478	0	0.116896	0.605902	0.807155	0	0.136257	0.41796	0.296777	0	0	0	0	0
Unigene0000783	417	0.732309	0.459674	0.467866	0.395984	0.543501	0.611312	0.434221	0.408253	0	0.337439	0.132269	0.502907	0.289632	0.868127	0.251792	0.195399	0.0749221	0.141865	0	0	0	0	0
Unigene0000784	518	0	0	0.564962	1.35479	0	0	0	0	0.148435	0.54329	1.17127	0	0	0	0	0.1573	0.48251	0.62812	Auxin0induced protein 5NG4 [Medicago truncatula]	0	0	0	0
Unigene0000785	451	0	0	0.108149	0.0915329	0	0	0	0	0	0	0.0611486	0	0	0	0	0	0	0	Auxin0induced protein 5NG4 [Medicago truncatula]	0	0	0	0
Unigene0000786	220	0.198294	0	0.221705	0	0.412073	0	0	0	0.174748	0	0.125355	1.27098	0	1.097	0	0	0	0.403347	PREDICTED: uncharacterized mitochondrial protein AtMg008200like [Cicer arietinum]	0	0	GO:0046914//transition metal ion binding;GO:0097159	GO:0006259//DNA metabolic process
Unigene0000787	231	0	0	0.422294	0.536121	0.196225	0.827653	0	0.491317	1.16499	0.913714	1.07447	0.302615	0.522842	0	0	0	0.405747	0	gag/pol polyprotein [Pisum sativum]	0	0	0	0
Unigene0000788	224	0	0.855732	0	1.29004	0.809429	1.42253	1.88615	3.04002	2.23116	3.29794	3.32414	2.1845	5.12221	4.30963	1.40621	2.18254	2.65004	3.5653	0	0	0	0	0
Unigene0000789	557	1.17481	0.344136	1.22594	1.03759	1.22068	0.22883	0.758523	1.73196	0.621188	0.947343	0.643652	0.627505	1.301	1.29985	1.06819	0.438859	0.673089	0.106207	0	0	0	0	0
Unigene0000790	225	0.581663	0.511157	0.650334	0	0	0.283241	0	0	0.34173	0	0	0.310685	0	0	0.466655	0	0.277711	0	0	0	0	0	0
Unigene0000791	507	0.860448	2.87337	1.44305	0.244268	0.804639	0.879892	0	0.335782	0.303311	0	0	0	0.119109	0.238007	1.65676	1.60713	1.23245	0.991793	0	0	0	0	0
Unigene0000792	290	1.20344	0.132196	0.840949	0.284699	0.312607	0.659269	0.832507	0.587039	0.265135	0.242607	0.0950967	0.241049	0.208235	0	0.965492	1.82631	0.646397	0.203991	0	0	0	0	0
Unigene0000793	220	0.396588	0.174258	0.886818	0.375285	1.03018	0	0	0	0	0	0	0	0	0	0	0	0	0	0	0	0	0	0
Unigene0000794	358	0.487427	0.428344	0.544972	0.461244	0.253229	1.2461	1.34876	0.158511	0.322162	0.491313	0.231101	0	1.01209	0.337066	0.68434	0.569004	0	0.413111	0	0	0	0	0
Unigene0000795	375	0.46533	0.204463	0.7804	0.770585	0.966998	2.03934	0.321903	0.151326	0	0	0.220624	0.372822	0.161035	0.482678	0.186662	0.217284	0.749821	0.0788767	0	0	0	0	0
Unigene0000796	555	0.786031	0.414452	1.40613	0.371904	2.61351	1.60759	1.84877	0.920223	0.484887	1.20429	0.546592	2.64502	1.74092	2.28294	0.504491	0.88088	1.01327	0.799426	0	0	0	0	0
Unigene0000797	1010	0	0	0	0.16349	1.52589	2.77633	0.239037	0.449482	0.456768	0.905572	0.21844	0	0.239161	0	0.13861	0	0.958929	0.322145	Retrotransposon gag protein [Asparagus officinalis]	0	0	0	0
Unigene0000798	390	0.447433	0.294898	0	0.317549	0.348677	1.30727	0.619044	1.01854	0	0.0902	0.141426	0.358483	0	0	0.0897413	0.417853	0.560763	0.075843	0	0	0	0	0
Unigene0000799	315	0.276982	0	0.154841	0.131052	0.143898	0	1.53287	0.360299	0	0.111676	0.175099	0.221918	0.383417	0.574617	0	0	0.396731	0.469504	0	0	0	0	0
Unigene0000800	217	0.201035	0	0	0	0	0.293683	0	0.261507	0	0.162111	0	0	0	0	0	0	0	0	60S ribosomal protein L23 [Medicago truncatula]	0	GO:0030529//ribonucleoprotein complex	GO:0003676//nucleic acid binding;GO:0005198//structural molecule activity	GO:0044260;GO:0010467//gene expression;GO:0044238//primary metabolic process
Unigene0000801	230	0.189673	0	0.424131	0.717936	0	0.831252	1.04968	0.493453	0.16715	0.305896	0.239809	0	0.525115	0.262325	0	0	0.407511	0.38581	0	0	0	0	0
Unigene0000802	211	0.206752	0.545073	0.693484	0.97823	0.42965	0.302035	0	0.537887	0	0.333441	0.261403	0.331299	0.2862	0	0.66349	0	0.296138	0.280367	0	0	0	0	0
Unigene0000803	762	0.515252	0.452797	0.960138	0.595925	0.53537	1.17088	1.02971	0.372356	0.201809	0.60015	0.398108	0.366951	0	0.475077	0.413375	0.427724	0.533009	0.465807	0	0	0	0	0
Unigene0000804	270	1.13101	0.283976	0.361296	1.22315	1.34305	2.83241	0.894175	0.630523	1.42387	1.04231	0.204282	1.03562	2.68392	2.45808	0.518505	0.452675	0	0.219102	0	0	0	0	0
Unigene0000805	524	0.166506	0.365809	0.186164	0.630249	0.605527	0.729725	1.15185	0.324888	0.660308	0.671336	0.631558	0.533619	1.61343	1.38171	0.200376	0.388747	0.536608	0.620928	PREDICTED: uncharacterized protein LOC101497564 [Cicer arietinum]	0	0	0	0
Unigene0000806	335	0.260446	0.801067	0.582388	0.739367	0	0.57071	0	0.169394	0.45904	0.630054	0.0823225	0.417338	0.360527	0	0.20895	0.60807	0.0932613	0.441474	0	0	0	0	0
Unigene0000807	288	0.151475	0.399342	0.338715	0.71669	0.157389	0.885129	0	0	0.133488	0	0.478785	1.45634	0.419362	0.209496	0.486098	0.424382	0.108481	0.205408	0	0	0	0	0
Unigene0000808	384	0.340818	0.898518	0	0.645021	0.826292	0.829808	0.628717	0	0.500581	0.732875	0.143636	0.364084	0.314522	1.09985	0.0911435	0.318287	0.244082	0.462168	0	0	0	0	0
Unigene0000809	725	0.481376	0.105757	0.470931	0.455518	0.375128	0.175805	0.166501	0.156544	0.053027	0.145564	0.0380387	0	0.166588	0.0832204	0.0482746	0.224776	0	0.0815966	0	0	0	0	0
Unigene0000810	334	0	0	0	1.97755	0	0	0	0	0	0	0	0	0	0	0	0	0	0	0	0	0	0	0
Unigene0000811	942	0.231554	0.244183	0.414225	0.306761	0.336832	0.473572	0.768876	0.54217	0.530552	0.298752	0.351312	0.296833	0.70517	0.512397	0.408694	0.432492	0.198997	0.3454	0	0	0	0	0
Unigene0000812	493	0	0	0.19787	0.50241	0.27583	0.646342	0.612138	0.230211	0	0.71355	0.111878	0.141793	0	0.367149	0	0	0	0.359985	0	0	0	0	0
Unigene0000813	278	0.313847	0	0.17545	1.18795	0	0.687726	0.434221	0	0	0	0	0	0.434447	0	0	0	0	0	0	0	0	0	0
Unigene0000814	251	0	0	0.777291	0.328935	0	0	0.480931	0	0	0.280303	0	0	0	0	0	0.162314	0	0	0	0	0	0	0
Unigene0000815	430	0.913075	1.33733	0.680582	0.768025	1.15955	1.18566	0.421094	0.65985	0.357624	0.654474	0.577215	0.812838	0.702188	0	0.488359	0.189492	0.799228	0.756666	0	0	0	0	0
Unigene0000816	798	0.874681	0.336288	0.244486	0.413848	1.02244	0.798613	0.45381	0.284447	0.289057	0.0881654	0.483825	0.525595	0.151349	0.30243	0.614019	0.612642	0.469813	0.296529	0	0	0	0	0
Unigene0000817	545	0.560317	0.562742	0.715963	0.68171	0.665365	0.584672	0.885971	0.832985	1.19919	1.0973	1.36625	4.10446	2.43769	1.99271	0.577967	0.971797	0.343955	0.325638	0	0	0	0	0
Unigene0000818	1085	0.683521	0.600669	0.359631	0.722899	1.0862	2.70189	1.50197	0.104603	0.212597	0.45391	0.254175	0.257711	0.278287	0.333649	0.58063	0.750981	0.403129	0.599754	0	0	0	0	0
Unigene0000819	1104	0.790303	0.833408	1.06033	0.822635	1.64232	0.115452	0.820065	0.719619	0.870575	0.446098	0.499602	1.13974	1.58628	0.874417	0.91936	0.996376	0.820683	0.643017	0	0	0	0	0
Unigene0000820	326	0.133818	1.76396	0.44885	1.89945	0.139043	0.390977	0.555431	0	0	0	0	0	0	0	0	0	0	0	0	0	0	0	0
Unigene0000821	280	0.62321	0.547668	0.348393	0.8846	0.323772	0.455209	0	0.810673	0.137302	0.502543	0.196986	0.249657	0.431344	0.215481	0.499987	0.145503	0.334741	0.422554	0	0	0	0	0
Unigene0000822	471	0.555729	0.73255	0.621338	0.876461	0.192476	1.62368	0.128146	0.481929	0.816234	0.448127	0.761177	0	0.256425	0.256199	0.74308	0.51899	0.397994	0.753599	PREDICTED: uncharacterized protein LOC101501579 [Cicer arietinum]	0	0	GO:0003676//nucleic acid binding	0
Unigene0000823	420	0	1.46045	0.232262	0.8846	0.323772	0.303473	0.43112	0.540449	0	0.251271	0.32831	0.665753	0.575126	0.143654	0	0.194003	0.148774	0.140851	0	0	0	0	0
Unigene0000824	224	0.584259	0.342293	0.217746	0	0.809429	0.284506	1.0778	0.760006	0	0.785223	0.123116	0	0	1.07741	0.624984	0.545635	0	0	0	0	0	0	0
Unigene0000825	278	0.156923	0	1.0527	0.445482	0	0	0.868443	0	0.13829	0	0	0.251454	0	0.434063	0	0.146549	0	0	MYB0related transcription factor [Medicago truncatula]	0	0	0	0
Unigene0000826	216	0	0.532455	0.22581	0.382235	0.209852	0	0	0	0	0.162861	0.127676	0.32363	0.279575	0	0.324066	0	0.144641	0.273877	0	0	0	0	0
Unigene0000827	234	0	0.327665	0	0.352832	0.387419	0	0.51587	0	0	0	0	0	0	0.257841	0	0	0	0	Receptor0like protein kinase [Medicago truncatula]	0	0	GO:1901363;GO:0097159;GO:0016772//transferase activity, transferring phosphorus0containing groups	GO:0044260;GO:0044238//primary metabolic process
Unigene0000828	638	0	0	0	0.129409	0	0.0998892	0	0	0	0	0	0	0	0	0	0	0	0	PREDICTED: 20oxoisovalerate dehydrogenase subunit alpha, mitochondrial0like [Cicer arietinum]	ko00280//Valine, leucine and isoleucine degradation	GO:0043231//intracellular membrane0bounded organelle	GO:0016624//oxidoreductase activity, acting on the aldehyde or oxo group of donors, disulfide as acceptor	GO:0044710
Unigene0000829	1191	0	0	1.18764	0.762543	0.152235	0.214036	1.72303	0.0952932	0.0645585	0.0590731	1.20408	0	0.101408	0.101318	0.146932	0.136829	2.07234	1.14242	PREDICTED: 20oxoisovalerate dehydrogenase subunit alpha, mitochondrial0like [Cicer arietinum]	ko00280//Valine, leucine and isoleucine degradation	0	GO:0016903//oxidoreductase activity, acting on the aldehyde or oxo group of donors	0
Unigene0000830	322	0.948363	0.357175	1.06033	0.512812	1.68924	0.791668	1.3121	1.40987	2.50726	0.983236	1.62728	2.17093	1.87541	2.81063	1.5217	0.885668	1.16432	2.02091	0	0	0	0	0
Unigene0000831	231	0.377703	0.33192	0.633442	0.178707	0.39245	1.65531	0.52257	1.47395	0.332854	0	0	0.60523	0	0.26119	0	0	0.135249	0.128047	0	0	0	0	0
Unigene0000832	215	0.202906	0.178311	0.453721	0.768025	0.210828	1.48208	0	0	0	0	0	0	0	0	0	0	0	0	0	0	0	0	0
Unigene0000833	529	0.0824664	0.0724703	0.184405	0.0780365	0.428431	0.602356	0.228192	0.750907	0	0.265996	0.312794	0.264288	0	0.456218	0.132322	0	0.177179	0.0559145	0	0	0	0	0
Unigene0000834	467	0.0934148	0	0.208887	0.265191	0.194124	0.136465	0	0	0	0.0753276	0.0590536	0	0.129311	0.129197	0	0	0.0669005	0	0	0	0	0	0
Unigene0000835	247	1.58956	0.931258	1.18482	0	0	0	0	2.75694	0.778231	0.854526	0.446608	0	0	0	1.55866	0.329884	0.63244	0.119752	0	0	0	0	0
Unigene0000836	278	0.156923	0	0	0.296988	0	0.229242	0.217111	0	0	0	0	0	0	0.217032	0.125896	0	0	0	retrotransposon gag protein [Arachis hypogaea]	0	GO:0043231//intracellular membrane0bounded organelle	GO:0003676//nucleic acid binding	GO:0006259//DNA metabolic process
Unigene0000837	356	0.490165	0.969188	0.685042	0.115959	1.27326	0.895074	0.169542	0.956412	0.647943	0.197629	0.154933	0.785439	1.86593	0	0.688184	0.457761	0.61432	0	0	0	0	0	0
Unigene0000838	251	0	0.152736	0.194323	0	0	0.507803	0.480931	0.226084	0	0	0	0	0	0	0	0	0.124472	0	0	0	0	0	0
Unigene0000839	201	0.434077	0	0.242662	0	0.451025	0	0	0	0	0.175015	0	0.695563	0	0	0	0	0	0	0	0	0	0	0
Unigene0000840	622	0.420817	0.554712	0.313666	0.53095	0.437248	1.02459	0.485183	0	0.618081	0.226225	0.0886753	0.56193	0.67961	0.582008	1.23791	0.654995	0.301375	0.0475543	0	0	0	0	0
Unigene0000841	216	0	0.35497	1.12905	0	1.25911	0.590086	0.558859	0	0.355969	0.162861	0	0.97089	0.279575	0.279328	0.648131	0.188614	0.144641	0.136939	0	0	0	0	0
Unigene0000842	219	0.398399	0.875269	0.445434	0.753997	0	1.45501	0	0	0.175546	0.32126	0	0	0	0	0.319626	0.372061	0.28532	0.675314	0	0	0	0	0
Unigene0000843	225	0	0	0.650334	0.366945	0	0	0	0	0	0	0.367707	0	0	0	0	0	0	1.05169	Protein kinase family protein [Medicago truncatula]	ko04626//Plant0pathogen interaction	GO:0016020//membrane	GO:0032550;GO:0004672//protein kinase activity	GO:0009967//positive regulation of signal transduction;GO:0006464//protein modification process;GO:0006796//phosphate0containing compound metabolic process
Unigene0000844	459	0.570258	0.584657	0.212527	0.269813	0	0.416531	0.262993	1.11269	0.418787	1.07297	0.600829	0	0.394694	0.525793	0.533755	0.443799	0.816798	0.708859	PREDICTED: serine/threonine0protein kinase PBS10like isoform X2 [Cicer arietinum]	ko04626//Plant0pathogen interaction	0	GO:0004672//protein kinase activity;GO:0097159;GO:1901363;GO:0036094	GO:0050896//response to stimulus;GO:0006464//protein modification process;GO:0006796//phosphate0containing compound metabolic process
Unigene0000845	273	0	0	0.357326	0.151214	0.99622	2.10097	0.884349	0	0	0	0	0	0	0.442013	0	0	0	0.108347	hypothetical protein MTR_7g024810 [Medicago truncatula]	0	0	0	0
Unigene0000846	728	0.898861	1.31651	0.401992	0.963987	1.3698	2.10097	0.663261	0	0	0	0	0	0	0	0	0	0	0	0	0	0	0	0
Unigene0000847	311	0.280545	0	0.156833	1.0619	0	0	0	0	0.247232	1.24424	0.532052	0	0	0	0	0	0	0.0951086	0	0	0	0	0
Unigene0000848	247	0	0	0.789879	0	0	0	0	0	0	0	1.22817	0	0	0	0	0	0	0.239504	0	0	0	0	0
Unigene0000849	560	0	0	0.348393	0.294867	2.67112	2.27605	0.97002	0	0.137302	0.628179	0.492465	0.374486	0.431344	0.754185	0.0624984	0.0727513	0.334741	0.422554	0	0	0	0	0
Unigene0000850	261	0	0.293768	1.30814	0.316332	0.173671	0.976694	0.462504	0.434844	0.441892	0.943471	1.05663	0.803495	0.92549	1.38701	1.20687	0.624379	0.718219	0.7933	0	0	0	0	0
Unigene0000851	699	0.312051	0.10969	0.139557	0.413404	0.907857	1.00289	0.345389	0	0.549994	0.553588	0.276175	0.800047	0.259177	0.949475	0.450632	0.40799	0.44696	0.550106	0	0	0	0	0
Unigene0000852	876	0.796798	0.175054	0.556792	0.801122	0.310466	0.945754	0.826805	0.259119	0.175546	0.48189	0.818526	0.478795	0.275745	0.688753	0.199766	0.883646	0.57064	0.47272	PREDICTED: LOB domain0containing protein 180like [Cicer arietinum]	0	GO:0043231//intracellular membrane0bounded organelle	0	GO:0022610;GO:0010053//root epidermal cell differentiation;GO:0007015//actin filament organization;GO:0044260;GO:0045229//external encapsulating structure organization;GO:0010087//phloem or xylem histogenesis;GO:0009791//post0embryonic development;GO:0000904//cell morphogenesis involved in differentiation
Unigene0000853	501	0.435376	0.841726	0.681487	0.329591	0.3619	0.636021	0.120473	0.226535	0.844093	0.702156	0.770644	0	0.482141	0	0.419151	0.894507	0.249441	0.177118	0	0	0	0	0
Unigene0000854	244	0.536369	0.157118	0.399795	0.338372	0.185771	0	0	0	0	0.144172	0	0.286492	0.247493	0	0	0	0.256086	0	Integrase, catalytic region; Zinc finger, CCHC0type; Peptidase aspartic, catalytic [Medicago truncatula]	0	0	GO:0016772//transferase activity, transferring phosphorus0containing groups;GO:0003676//nucleic acid binding;GO:0046872//metal ion binding;GO:0016874//ligase activity;GO:0036094;GO:0008168//methyltransferase activity	GO:0006412//translation;GO:0090304
Unigene0000855	304	0	0	0.320888	3.25905	0	0	0	0.186668	0.252925	0.578586	2.44936	0	0	0	0	0	0.616629	0.778388	Ovate protein [Medicago truncatula]	0	0	0	0
Unigene0000856	298	1.7567	1.28647	0.327349	0.554112	0.304215	0	0	0.380853	0.387026	0.354141	0	0.234577	0.40529	0	0.939573	0.683569	0.419363	0.0992576	copia0type polyprotein [Glycine max]	0	0	GO:0046872//metal ion binding;GO:0097159	GO:0006259//DNA metabolic process
Unigene0000857	214	0	0.358288	0	0.57871	0.847253	0.595601	0.282041	0	0.359295	0.164383	0	0.326655	0.282188	1.40969	0	0	0.145993	0	0	0	0	0	0
Unigene0000858	344	0.760896	0.334332	0.283576	0.480015	0.131768	0	0	0.65985	0.111758	0.818093	0.400843	0.609629	0.702188	0	0.712191	0.473729	0.0908213	0.0859848	0	0	0	0	0
Unigene0000859	308	0.566555	0	0	0.268061	0.588676	1.03457	0.391927	0	0	0.228429	0.268617	0	1.17639	1.56714	0	0.132275	0.608621	0.19207	0	0	0	0	0
Unigene0000860	374	0	0	1.30414	0.993401	0	0	0	0	0	4.13859	1.62224	0	0	0	0	0	0	0	0	0	0	0	0
Unigene0000861	304	0.430507	0	0.160444	0	1.49105	1.67709	1.19125	0.933341	0.50585	1.38861	0.544303	0.459895	2.97968	1.78623	0.345386	0.536062	1.02771	0.389194	0	0	0	0	0
Unigene0000862	275	0.317271	0.278813	0.177364	0.600456	0.329658	0	0.658438	0.619059	0.139799	0.12792	0.300851	1.01679	0	0.219399	0	0	0.113609	0.107559	0	0	0	0	0
Unigene0000863	259	0.673741	0.296037	0.376641	0	0.350023	0.984236	0.233038	0.438202	0.148435	0.135822	0.319437	1.0796	0.466318	0.465906	0	0.3146	0.241255	0.228407	0	0	0	0	0
Unigene0000864	455	0.671149	0.168513	0.750385	0.272185	1.29509	0.280129	0.265305	0.498876	0.168987	1.31434	0.545499	0.307271	1.06177	0.928228	0.384605	0.08954	0.480654	0.0650083	0	0	0	0	0
Unigene0000865	424	0	0	0	0.194723	0.962151	0.60122	1.28116	0.133838	0	0	0.0650425	0	0.142425	0.142299	0	0.0960866	0	0	envelope0like protein [Glycine max]	0	0	0	0
Unigene0000866	1197	0.473785	0.448383	0.651963	0.448335	0.605888	0.585649	0.352964	0	0	0	0	0	0	0.10081	0.350868	0.204214	0.156604	0.123554	envelope0like protein [Glycine max]	ko05130//Pathogenic Escherichia coli infection	0	0	0
Unigene0000867	249	0.350399	0.307926	0.391767	0.331577	0.364081	0.511882	0	1.1395	0.308792	0	0.332265	0	1.45514	0.484617	0.702793	1.14532	0.376416	0.23758	0	0	0	0	0
Unigene0000868	777	0.44916	0.444055	0.878829	0.425033	0.875058	0.656157	0.233038	0.146067	0.643217	0.588564	0.496901	0.179933	0.621757	0.388255	0.315307	0.0524334	0.120628	0.266475	hypothetical protein [Lotus japonicus]	0	0	0	0
Unigene0000869	306	0.285129	0.501134	0.956373	0.944344	1.77757	1.04133	0.394489	0.370896	0.502544	0	0.270373	0	0	0.591518	0.114376	0.13314	0.2042	0.0966626	0	0	0	0	0
Unigene0000870	209	0	0.18343	0.466747	0.790073	0.650642	0.60985	0	0	0	0.168316	0	0	0.288939	0.288683	0.16746	0.194932	0	0.424576	0	0	0	0	0
Unigene0000871	398	0.21922	0.192647	0.12255	0.414888	0.341669	0.320248	0.3033	0	0	0	0	0.702554	0	0	0	0	0	0	0	0	0	0	0
Unigene0000872	376	0.348069	0.305879	0.778325	0.109791	0.482213	0.169493	1.12366	0	0	0	0	0	0.160607	0.160465	0	0	0	0	0	0	0	0	0
Unigene0000873	276	0.158061	0.416704	0.530163	0.14957	0.656928	1.15452	0.656052	0	0.975044	0.127457	0.499602	0.253276	0.437596	0	0.380425	0.442834	0.565988	0.107169	0	0	0	0	0
Unigene0000874	509	0.342827	1.05445	0.670776	1.13544	2.22633	1.00164	0.948633	1.67231	1.58612	3.04093	1.24616	2.06004	1.42369	2.13365	1.78777	1.52077	2.88487	1.5109	0	0	0	0	0
Unigene0000875	241	1.44812	0.159074	0	0.856459	0.188083	0.528874	0.751329	0.235465	0.638085	0.583867	0	0.290058	0	0.751056	0.435673	0.169049	0.518548	0.122733	TMV resistance protein N [Medicago truncatula]	0	0	GO:0016462//pyrophosphatase activity;GO:0032550	GO:0006950//response to stress;GO:0007154//cell communication
Unigene0000876	263	0.165873	0	0.185456	0.313926	0.3447	0.242317	0	0	0	0	0	0	0	0	0	0	0	0	0	0	0	0	0
Unigene0000877	1713	0	0	0	0	0.0529224	0.148813	0.0704691	0	0	0	0	0	0	0.0704434	0.163452	0.237833	0.255339	0	0	0	0	0	0
Unigene0000878	1691	0	0	0.0576878	0	0.0536109	0	0.0713859	0	0	0	0	0	0	0.0713599	0	0.0481854	0	0	0	0	0	0	0
Unigene0000879	214	0.203854	0	0.455841	0	1.27088	0.595601	0	0	0	0	0	0	0	0	0	0	0	0	0	0	0	0	0
Unigene0000880	218	0	0	0	0	0.415853	1.16934	1.38433	0	0	0.161367	0	0	0.55402	1.10706	0	0	0.143314	0.271365	0	0	0	0	0
Unigene0000881	315	0.276982	0.243408	0.619365	0.524207	0.431695	0	0.574827	0.18015	0.244093	0.781733	0.175099	0.443836	0	0.574617	0.222216	0.129336	0.297548	0	Integrase core domain containing protein [Solanum demissum]	0	0	GO:0005488//binding	0
Unigene0000882	539	0	0	0	2.83378	0	0	0	0	0	0	1.1768	0	0	0	0	0	0	1.04267	0	0	0	0	0
Unigene0000883	301	0.144933	1.27365	0.972259	0.411442	0.602366	0.635176	1.80469	0.188529	0	0	0	0	0	0	0.232552	0.135351	0	0	gag0pol polyprotein [Rosa rugosa]	0	0	GO:0046914//transition metal ion binding;GO:0003676//nucleic acid binding	GO:0006259//DNA metabolic process
Unigene0000884	297	0.440654	0.25816	0.985354	0.277989	0.305239	0.429153	0	0.573203	0	0.355333	0.185711	0.235367	0.406655	0.203147	0	0.137174	0.105194	0	reverse transcriptase family member [Glycine max]	0	GO:0044446//intracellular organelle part;GO:0005739//mitochondrion	GO:0070011;GO:0032550;GO:0003677//DNA binding;GO:0034061;GO:0016887//ATPase activity	GO:0051603//proteolysis involved in cellular protein catabolic process;GO:0016043//cellular component organization;GO:0006950//response to stress;GO:0006260//DNA replication
Unigene0000885	268	0	0.715239	0.363993	2.00245	0	0.237796	0.225212	0.635229	0.71725	1.05009	0.308709	1.30418	0.675987	0.67539	1.04475	0.912106	1.16577	1.10369	0	0	0	0	0
Unigene0000886	299	0.72951	0.128217	0.489381	0.966452	0.454796	1.06571	2.01862	0.569369	0.128577	0.470609	0.461171	1.16896	0.201967	0.403577	0.234108	0.545026	0.10449	0.296777	0	0	0	0	0
Unigene0000887	471	0.463107	0.325578	0.517781	0.438231	1.15485	1.08245	0.897022	0.361447	0.408117	0.149376	0.117104	0	0.641064	0.768596	0.148616	0.0864983	0.0663323	0.1256	0	0	0	0	0
Unigene0000888	216	0.605899	0.887426	0.22581	1.1467	1.04926	0.295043	1.11772	0.525436	0.355969	0.325722	0.255352	0	0	0.558656	0.486098	1.13169	0.144641	0.273877	0	0	0	0	0
Unigene0000889	525	0.166189	0.219067	0	0.0786311	0.604374	0.849724	0.229931	0.324269	0.146456	0.134011	0.105059	0	0.115025	0	0.333325	0.0776014	0.0595096	0.281702	0	0	0	0	0
Unigene0000890	451	0.290186	0	0.75704	0	0.90455	1.13045	1.33829	0.5033	0.340972	1.092	0.550338	0.929988	0.803391	1.87292	0.23281	0.180668	0.138548	0.524679	0	0	0	0	0
Unigene0000891	205	0	0	0	0.201372	0	0.310875	0.294423	0	0	0	0.134527	0	0	0.294316	0	0.198735	0	0	0	0	0	0	0
Unigene0000892	384	0.227212	1.19802	0.889128	0.967531	1.53454	1.99154	1.57179	0.147779	0	0	0	0.182042	0.157261	0	0	0	0	0	0	0	0	0	0
Unigene0000893	207	0	0	0	0.398853	0.218976	0	0	0	0	0	0	0	0	0	0	0	0	0	0	0	0	0	0
Unigene0000894	226	0	0	0.431637	0	0	0.563976	0.534131	0	0	0	0.244053	0	0	0	0	0	0	0	0	0	0	0	0
Unigene0000895	474	0.276106	1.13231	1.02901	1.13219	1.43443	1.0756	0.76401	0.11972	0.162214	0.14843	0	0.294954	0.127401	0	0.516864	0.601656	1.38416	0.686427	0	0	0	0	0
Unigene0000896	526	0.829367	0.218651	0	0.156963	0.3447	1.21158	0	0	0	0	0	0	0	0	1.92961	0.774538	1.54431	0.393634	0	0	0	0	0
Unigene0000897	443	0.196951	0	0	0.186372	0.204641	0.287717	0	0	0	0	0	0	0	0	0.474028	0	0.634724	0.333846	0	0	0	0	0
Unigene0000898	499	0.61197	0.460963	0.781964	0.496369	0.726702	0.893998	0.846688	0.227443	0.385217	0.211491	0.110533	0.700442	0	0.362734	0.140277	0	0.187831	0.533485	0	0	0	0	0
Unigene0000899	817	0.106792	0.140772	0.417901	0.101056	0.0554811	0	0.443257	0.277832	0.0941117	0.17223	0.236287	0.171124	0	0.147698	0.0428385	0.0997325	0.114722	0	Calcium0dependent lipid0binding family protein [Theobroma cacao]	0	0	0	0
Unigene0000900	637	0.205454	0	0	0	0	0	0.379007	0	0	0	0	0.219479	0.189602	0	0	0	0	0.0464345	Calcium0dependent lipid0binding family protein [Theobroma cacao]	0	0	0	0
Unigene0000901	966	0.316121	0.555606	0.656393	0.555546	0.750775	1.12153	0.499849	0.469955	0.318382	0.364162	0.513876	0.506551	0.562623	0.187375	0.471002	0.379572	0.905581	0.214339	0	0	0	0	0
Unigene0000902	587	0.222954	0.326548	1.66184	0.281304	0.15444	0.434271	0	0.193346	0.130987	0.539356	0	0.119087	0.205752	0	0.775108	0.55524	0.425793	0	0	0	0	0	0
Unigene0000903	237	0	0.485276	0.205802	0.870914	0	0	0	0.957757	0	0.296861	0	0	0	0	0	0	0	0	0	0	0	0	0
Unigene0000904	652	0.535272	0.646786	0.374042	0.37989	0.278086	0.879699	0.648002	0.522213	0.353785	0.107908	0.380678	0.321645	0.37048	0.092538	0.429437	0.124972	0.335426	0.0907324	0	0	0	0	0
Unigene0000905	285	0	0.672575	0.342281	0.289694	0.159046	1.34167	0.635335	0.199113	0.539573	0	0	0.490555	0.423777	0	0	0	0	0	0	0	0	0	0
Unigene0000906	255	0	0	0.191275	1.2951	0.177757	0.249919	0.236693	0	0.301526	0.689765	0.108149	0.274134	0.236816	0.236607	0.411754	0.159768	0.367559	0.579976	0	0	0	0	0
Unigene0000907	232	0.75215	0.165245	0.630711	0.177937	0.390759	0	0.260159	0.2446	0.16571	0	0.237742	0	0.780882	0.260064	0	0.175607	0	0.127495	0	0	0	0	0
Unigene0000908	296	0.147381	0.129516	0.329561	0	0.918811	0.430603	0.611724	0	0	0.118845	0.372676	0	0.816057	0	0.23648	0	0.211098	0	0	0	0	0	0
Unigene0000909	539	0.242809	0.49788	0.633442	0.536121	0.25229	2.48296	0.447917	0.421129	0.213977	0.261061	0.255826	0.259384	0.224075	0.223877	0.324667	0.5291	0.347783	0.38414	0	0	0	0	0
Unigene0000910	244	0.17879	0.314236	1.59918	0.169186	0.185771	0.783557	0	0	0.15756	0	0	0.286492	0	0	0	0	0	0.121224	hypothetical protein MTR_8g061160 [Medicago truncatula]	0	0	0	0
Unigene0000911	353	0.370748	0.977425	0.690864	0.701666	0.513632	0.722145	0.854912	0.48227	0	0.199309	0.0781247	0.198029	0.171071	0	0.495738	0.461651	0.531035	0.167585	0	0	0	0	0
Unigene0000912	506	1.12079	1.43952	1.06033	0.326335	1.16455	1.88921	0.357847	2.01867	1.82346	1.45996	0.490518	0.276301	1.0741	0.715432	0.899186	1.44927	0.246977	0.876841	0	0	0	0	0
Unigene0000913	236	0.18485	0	0.206674	0.349842	0	0.270039	0.255749	0	0	0	0	0	0	0.511312	0	0	0	0	0	0	0	0	0
Unigene0000914	524	0.333013	0.146324	0.837739	1.6544	0	0	0.230369	0.108296	0.0733676	1.27554	0.999967	0	0.230489	0	0	0.233248	0.238493	1.5241	PREDICTED: protein NtpR0like [Cicer arietinum]	0	0	GO:0003824//catalytic activity	GO:0009064//glutamine family amino acid metabolic process
Unigene0000915	688	0.253632	0.835831	1.1343	0.660021	0.856489	0.741038	1.22819	0.742331	0.558788	0.306785	0.160337	0.609629	0.526641	0.350784	0.559578	0.236865	0.227053	0.300947	0	0	0	0	0
Unigene0000916	206	0.423541	0	0.473544	0.40079	0	0.309365	1.46497	0.550943	0	0.341534	0.133874	0	0	0.292887	0	0.19777	0.303326	0	0	0	0	0	0
Unigene0000917	332	0.525599	0.115472	0.587651	0.124341	0.13653	0.191956	0.181798	0	0	0	0	0.421109	0.181892	0	0	0	0	0	polyprotein0like [Solanum chilense]	0	0	GO:0046914//transition metal ion binding;GO:0097159;GO:0008289//lipid binding	GO:0006259//DNA metabolic process
Unigene0000918	450	0.484719	0.255579	0.650334	0.0917363	0.100729	0.424862	0.268252	0.252209	0.0854325	0.156347	0.122569	0	0	0	0	0.0905349	0	0	reverse transcriptase family member [Glycine max]	0	GO:0016020//membrane;GO:0044439;GO:0043232	GO:0016301//kinase activity;GO:0032550;GO:0016773//phosphotransferase activity, alcohol group as acceptor;GO:0003676//nucleic acid binding;GO:0016887//ATPase activity	GO:0009062//fatty acid catabolic process;GO:0051276//chromosome organization;GO:0044267//cellular protein metabolic process;GO:0006974//response to DNA damage stimulus;GO:0006259//DNA metabolic process;GO:0034645//cellular macromolecule biosynthetic process;GO:0009154;GO:0065007//biological regulation;GO:0006625//protein targeting to peroxisome
Unigene0000919	201	0.217038	0	0.727985	0.20538	0.451025	0.317061	0.300283	0.282324	0.191267	0	0.274408	0	0	0	0.174125	0.60807	0.155435	0.147158	0	0	0	0	0
Unigene0000920	240	0.727078	1.11816	1.01615	0.688022	0.755467	0.796616	0	1.65512	0.160186	0.439725	0.689451	0.582534	1.5097	0	0.437489	0.339506	0.520709	0.369735	0	0	0	0	0
Unigene0000921	384	0.681636	0.998354	1.14316	1.29004	0.354125	0.165962	0	1.33001	1.00116	0.549656	0.789996	0.91021	1.25809	0.471366	0.729148	0.106096	0.650886	0.616224	0	0	0	0	0
Unigene0000922	706	0.865079	0.271507	0.759951	0.350833	0.256816	0.812413	0.68393	0.241135	0.0544541	0.0996544	0.117187	0	0	0.4273	0.347016	0.173119	0.132759	0.167585	0	0	0	0	0
Unigene0000923	202	0	0.379572	0.482921	0.613089	0	0	0	0	0	0	0.27305	0	0	0	0.173263	0	0.154666	0.14643	0	0	0	0	0
Unigene0000924	807	0.648694	0.285032	1.26924	0.511541	0.337011	1.02662	0.598332	0.421912	0.809862	0.871822	1.09355	1.03947	0.448983	0.672879	0.69391	0.302905	0.232287	0.256569	0	0	0	0	0
Unigene0000925	701	0.746785	0.765642	0.626213	0.412224	0.32331	1.27277	0.430505	0.647613	0.21937	0.0501826	0.275387	0.0997205	0.344583	0.430348	0	0	0.356548	0.337561	0	0	0	0	0
Unigene0000926	334	0.261226	0.114781	0	0.247194	0.135713	0.572419	0.180709	0.169902	0.115104	0.105323	0.247707	0	0	0	0	0.243956	0.187081	0	0	0	0	0	0
Unigene0000927	347	0	0.220961	0.70281	0.237933	0	0.367316	0	0.163536	0.553957	0.40551	0	0	0.522088	0	0.403448	0.234817	0.360144	0	0	0	0	0	0
Unigene0000928	625	0	0.245355	0.54628	0.2642	0.580199	0.407867	0.965709	0.0907954	0.43058	0.168854	0.176499	0.782926	0.386484	0.579214	0.111997	0.195555	0.0499881	0.047326	0	0	0	0	0
Unigene0000929	261	0.167144	0.146884	0	0.158166	0.521012	1.46504	0	0	0.294595	0.134782	0	0.803495	0	0	0	0	0	0	0	0	0	0	0
Unigene0000930	245	0.35612	0	0.597245	0	0.370025	1.04048	0	0	0	0.143584	0.225127	0	0.739447	0	0	0	0	0	0	0	0	0	0
Unigene0000931	637	0.547877	0.782383	0.535989	1.29612	1.42317	0.800368	0.379007	0.17817	0.482821	0.883592	0.432936	1.53635	1.70642	1.42076	0.439549	0.8954	0.294278	0.975124	integrase [Cucumis melo subsp. melo]	0	0	GO:0046872//metal ion binding	0
Unigene0000932	702	0.435004	0.600719	0.555841	1.35252	1.09769	0.181565	1.03174	0.565854	0	0.400889	0.274995	1.59326	1.1183	0.85947	0.0498563	0.464282	0.17802	0.294945	PREDICTED: uncharacterized mitochondrial protein AtMg008100like [Solanum lycopersicum]	0	0	GO:0046914//transition metal ion binding;GO:0097159	GO:0006259//DNA metabolic process
Unigene0000933	460	0	0.333363	0.636196	0.358968	1.47809	0.831252	0.524842	0	0.334301	0	0.0599522	0	0	0.262325	0.684765	0.974234	0.339593	0.38581	0	0	0	0	0
Unigene0000934	250	0.348998	0	0.5853	0.165125	0	1.01967	0.482854	0	0	0	0	0	0	0	0.559985	0.162963	0.624851	0.118315	0	0	0	0	0
Unigene0000935	246	0	0	0	0	0	0	0	0	0	0	0	0	0	0	0	0	0	0.120239	0	0	0	0	0
Unigene0000936	886	0.541616	0.605773	0.990914	0.512522	0.716244	2.01402	0.749351	0.832633	0.564086	0.238226	0.311264	0.236696	0.204475	0.204294	0.316019	0.459827	0.352625	0.367231	0	0	0	0	0
Unigene0000937	586	1.19112	0.850475	1.24851	0.845351	1.93379	2.61007	1.33897	0.581028	0.787262	0.480246	0.32943	0.954322	1.13357	2.05921	0.238902	0.973328	0.10663	0.35333	Pleiotropic drug resistance protein [Medicago truncatula]	0	0	GO:0017111//nucleoside0triphosphatase activity;GO:0032550;GO:0015604//organic phosphonate transmembrane transporter activity	GO:0009154
Unigene0000938	357	0	0.751702	0.546499	0.57817	0.761816	0	0.5072	0	0.215376	0.197076	0	0	0.676618	0	0	0.11412	0	0	0	0	0	0	0
Unigene0000939	235	0.556911	0.163135	0.207553	0.526996	0.38577	0	0.513675	0	0	0.149694	0.35206	0	0.513942	0.513488	0.148932	0	0.132947	0	0	0	0	0	0
Unigene0000940	572	0.457602	0.0670224	0.085271	0.433021	0.237734	0.22283	0.316557	0	0.201633	0.4305	0.192853	0.24442	0.316721	0.316441	0.0611872	0	0.0546198	0.0517111	ribosomal protein L16 [Populus alba]	ko03010//Ribosome	GO:0030529//ribonucleoprotein complex;GO:0009536//plastid	GO:0003723//RNA binding;GO:0005198//structural molecule activity	GO:0010467//gene expression
Unigene0000941	219	0	0.175054	0.222717	0	0.827909	0	0.275602	0	0.175546	0.32126	0.503708	0.319197	0.275745	0.275501	0	0.186031	0.14266	0	0	0	0	0	0
Unigene0000942	290	0.45129	0.264392	0.336379	0	0.156304	0.439512	0.624381	0	0	0.242607	0.0950967	0.964194	0	0.208051	0.120687	0.702426	0	0.407983	0	0	0	0	0
Unigene0000943	269	0	0	0	0.306924	0.842528	0.710736	1.57062	0	0.42875	0.130773	0	1.29933	1.12246	2.01864	0	0	0	0.109958	0	0	0	0	0
Unigene0000944	389	0.672875	0.788417	0.501543	0.424487	1.51482	2.78508	0.620635	1.31292	2.07542	0.542591	0.921631	2.69553	2.01811	0.930614	0.539832	1.04732	0.48189	1.67283	gag0pro [Pisum sativum]	0	0	GO:0097159;GO:0016301//kinase activity;GO:1901363	GO:0044238//primary metabolic process;GO:0043170;GO:0044237//cellular metabolic process
Unigene0000945	428	1.01927	1.07486	0.569802	1.44678	0.953159	1.9357	1.12816	0.39776	0.718591	0.410958	0.515477	1.14329	0.282188	0.845815	0.245321	0.190377	0.145993	0.276437	0	0	0	0	0
Unigene0000946	303	1.15181	0	0	0.544968	0	0	0.597592	0	0	0	0	0	0	0	0	0	0	0	0	0	0	0	0
Unigene0000947	484	0	0	0	1.79113	0	0	0	0.117246	0	0	0.683753	0.28886	0	0	0	0	0.0645507	2.8112	F0box protein [Medicago truncatula]	0	0	0	0
Unigene0000948	442	0.394794	0.693878	0.551754	0.28019	0.820417	0.144184	0.273108	0.128387	0.0869788	0.318353	0.0623937	0.158154	0	0	0	0	0	0.200761	0	0	0	0	0
Unigene0000949	214	0.815415	0.537432	0	0	0.211813	0.2978	0	0	0	0	0	0	0	0	0	0	0	0	0	0	0	0	0
Unigene0000950	289	0.452852	1.06123	0.506315	0.71421	0.941066	0.441033	0.835388	0.58907	0.532105	1.33896	1.24053	0.483765	0.626867	0.835084	0.968833	0.704857	0.216211	1.22818	0	0	0	0	0
Unigene0000951	460	0.284509	0.250023	0.530163	0.538452	1.37955	1.93959	2.88663	1.85045	0.752177	1.30006	0.899284	0.607862	0.787672	1.57395	0.15217	0.885668	0.815023	0.835921	0	0	0	0	0
Unigene0000952	834	0.680001	0.87338	1.63753	0.98996	0.706552	1.29904	0.14474	0.748463	0.82974	0.421799	0.694411	1.00581	1.30334	0.868127	0.671445	1.17239	1.19875	0.957586	PREDICTED: pentatricopeptide repeat0containing protein At4g31070, mitochondrial0like [Cicer arietinum]	0	0	0	0
Unigene0000953	372	0.117271	0.309168	0.393347	1.44263	0.365549	0.171315	0.324499	0.305092	0.310037	0.945645	0.593076	0.187914	0.324668	2.10847	0.0940836	0.219036	0.419927	0.0795128	0	0	0	0	0
Unigene0000954	262	0.666026	0	0.372328	0	0.519023	0	0.460739	0	0	0	0	0	0	0	0	0.155499	0	0.112896	Histone deacetylase [Medicago truncatula]	0	0	GO:0005488//binding;GO:0016787//hydrolase activity	GO:0051704;GO:0090304;GO:0016570//histone modification
Unigene0000955	431	0.809739	0	0.339501	0.383121	0.420678	1.33077	2.80078	0.131664	0.0891986	0	0.0639861	0.648762	0	2.09982	0.243613	0	0	0.205885	0	0	0	0	0
Unigene0000956	383	0.911221	0.100096	0	0.215568	0.4734	0.831975	0.787948	0.592659	0.702643	0.64294	0.144011	0	0.315343	0.315064	0.456907	0.957354	0.326293	0.540604	0	0	0	0	0
Unigene0000957	283	0.462453	0	0	0.875222	0	0.450384	0.639825	0	0.135847	0.124304	0.194898	0	0	0	0.371015	0.28792	0.551988	0	0	0	0	0	0
Unigene0000958	714	0.183297	0.53693	0.136625	0.809438	1.20621	1.07108	0.422667	0.238433	0.80766	0.739034	0.463496	0.0979049	0.761196	0.507015	0.637238	0.228239	0.393813	0.289988	0	0	0	0	0
Unigene0000959	1848	1.77048	1.36917	0.739015	1.25095	0.39245	0.241399	0.979818	0.245658	0.208034	0.304571	0.761082	0.983499	0.588197	0.587677	1.23103	0.573192	0.659339	0.864314	PREDICTED: probable disease resistance RPP80like protein 40like isoform X1 [Cicer arietinum]	0	0	0	0
Unigene0000960	1197	0.0728901	0	0	0.137949	3.90041	0.212963	1.00847	0	0	0	0	0	0	0	0	0	0	0	DNA/RNA polymerases superfamily protein [Theobroma cacao]	0	0	0	0
Unigene0000961	214	0	0	0	0.192903	0.423626	0.2978	0	0	0	0.328766	0.128869	1.63327	0	0	0	0	0.145993	0	0	0	0	0	0
Unigene0000962	243	0.538577	0.473294	0.40144	0.169882	0.186535	0.26226	0	0	0	0.144765	0.11349	1.15068	0.745533	0.496583	0.288058	0.335315	0.51428	0	0	0	0	0	0
Unigene0000963	294	0	0	0	0	1.85012	0	0	0	0	0	0	0	0	0	0	0	0	0	jacalin0like lectin domain0containing protein [Arabidopsis thaliana]	0	GO:0043231//intracellular membrane0bounded organelle;GO:0043234//protein complex;GO:0005911//cell0cell junction;GO:0044444//cytoplasmic part	GO:0046914//transition metal ion binding;GO:0019899//enzyme binding	GO:0022610;GO:0044267//cellular protein metabolic process;GO:0009692;GO:0014070//response to organic cyclic compound;GO:0009755//hormone0mediated signaling pathway;GO:0006972//hyperosmotic response;GO:0009791//post0embryonic development;GO:0050790//regulation of catalytic activity
Unigene0000964	296	2.50547	0.777097	1.97737	0.418392	1.53135	1.72241	0.407816	1.53371	0.389641	0.831912	0.93169	3.30627	3.46824	3.87284	0.472961	0.963463	0.422196	1.09921	0	0	0	0	0
Unigene0000965	396	0.440654	0.48405	1.10852	0.521229	0.915718	0.482798	0.457248	0	0.0970824	0.0888333	0.278566	0.176525	0.152495	0	0.0883815	0.514403	0.236686	0.149388	0	0	0	0	0
Unigene0000966	504	0	0.15213	0.774207	0.0819074	0.629556	1.13802	0.598778	0.33778	0.610232	0.139595	0.273592	0.138699	0	0.239424	0.555541	1.05085	0.867848	0.352128	0	0	0	0	0
Unigene0000967	301	0	0.891553	0.324086	0.137147	0.903549	0.846901	0	0.188529	0.255446	0	0.274864	0.464479	0	0.601344	0.348828	0	0.311387	0	0	0	0	0	0
Unigene0000968	844	0.361816	0.908455	0.577903	1.12497	0.537062	0.755086	0	0.33618	0	1.12536	0.84956	0.496949	0.1431	0.21446	0.704958	0.675794	0.333155	0.77101	gag0pol polyprotein [Rosa rugosa]	0	GO:0043231//intracellular membrane0bounded organelle;GO:0016020//membrane	0	GO:0009626//plant0type hypersensitive response;GO:0042742//defense response to bacterium;GO:0002218//activation of innate immune response;GO:0006464//protein modification process
Unigene0000969	370	0.943237	0.310839	0.263649	0.446285	1.22508	0	0.978759	0	0.103904	0.380303	0.447211	0.56679	0.163211	0.489201	0.283776	0	0.168879	0.559598	Inversin [Medicago truncatula]	0	0	0	0
Unigene0000970	538	0.486521	0.783838	0.36264	0.230193	1.01103	1.18456	0.560937	0.105478	0.214375	0.457706	0.102521	1.5592	0.448983	0.224293	0.130108	0.378631	0.232287	0.219916	0	0	0	0	0
Unigene0000971	377	0.115715	0	0.38813	0.656997	1.20233	0	0.480293	0	0	0	0	0	0	0	0.0928358	0	0.0828714	0	Zinc knuckle family protein [Medicago truncatula]	0	0	0	0
Unigene0000972	881	0	0	0.221453	5.20117	0	0	0.0685094	0.837358	0.52365	0.878452	53.4031	0.555424	1.02818	0.821813	0	0	0.992952	51.234	Polygalacturonase [Medicago truncatula]	ko00500//Starch and sucrose metabolism;ko00040//Pentose and glucuronate interconversions	0	GO:0004553//hydrolase activity, hydrolyzing O0glycosyl compounds	GO:0008152//metabolic process
Unigene0000973	380	0.344406	0.80709	0.641776	0.869081	1.78926	1.8448	0.635335	2.09068	2.0234	0.74059	1.08861	1.47167	2.70158	2.06409	2.30257	3.10916	2.05543	0.934066	0	0	0	0	0
Unigene0000974	231	0.188852	0.16596	0.844589	0.357414	1.96225	1.10354	0.261285	0.982634	0.332854	1.82743	2.26832	0.60523	3.92131	3.13428	0	0.176367	0.270498	0.512186	0	0	0	0	0
Unigene0000975	1248	0.0699114	0	4.06458	1.09157	0.290564	0.0510651	0.773805	0.409234	0.43127	2.00131	0.220978	0.168039	0	0.386762	0.0560883	0.718186	1.65225	0.379215	PREDICTED: meiotic recombination protein SPO11020like isoform X2 [Cicer arietinum]	0	GO:0043231//intracellular membrane0bounded organelle;GO:0043232	GO:0008094//DNA0dependent ATPase activity;GO:0032550;GO:0003676//nucleic acid binding	GO:0045229//external encapsulating structure organization;GO:0006310//DNA recombination;GO:0009791//post0embryonic development;GO:0022610;GO:0007015//actin filament organization;GO:0000904//cell morphogenesis involved in differentiation;GO:0007059//chromosome segregation;GO:0000723//telomere maintenance;GO:0010212//response to ionizing radiation;GO:0007129//synapsis;GO:0071103//DNA conformation c…
Unigene0000976	423	0	0	0	0	0	0	0.285375	0	0	0	0	0	0	0.142635	0	0	0	0	PREDICTED: meiotic recombination protein SPO11020like isoform X2 [Cicer arietinum]	0	GO:0043231//intracellular membrane0bounded organelle;GO:0043232	GO:0008094//DNA0dependent ATPase activity;GO:0032550;GO:0003676//nucleic acid binding	GO:0045229//external encapsulating structure organization;GO:0006310//DNA recombination;GO:0009791//post0embryonic development;GO:0022610;GO:0007015//actin filament organization;GO:0000904//cell morphogenesis involved in differentiation;GO:0007059//chromosome segregation;GO:0000723//telomere maintenance;GO:0010212//response to ionizing radiation;GO:0007129//synapsis;GO:0071103//DNA conformation c…
Unigene0000977	1191	0.695944	1.09442	0.860013	1.55975	0.685058	0.749127	1.1149	0.28588	0.516468	0.886096	0.99568	0.117387	0.304223	0.45593	0.675885	1.29987	1.04929	1.21693	PREDICTED: transcription factor bHLH780like isoform X1 [Cicer arietinum]	0	0	0	0
Unigene0000978	493	0	0	0	0	0	0	0.856993	0.115106	0.155962	0	0	0.141793	0.489965	0	0	0	0	0	PREDICTED: tetratricopeptide repeat protein 7B0like [Cicer arietinum]	0	GO:0043231//intracellular membrane0bounded organelle	GO:0005515//protein binding	GO:0016129
Unigene0000979	536	0	0	0.181996	0.0770174	0	0	0.56303	0.211743	0.14345	0.196892	0	0	0	0	0.19589	0.304035	0.34973	0.331106	PREDICTED: tetratricopeptide repeat protein 7B0like [Cicer arietinum]	0	GO:0043231//intracellular membrane0bounded organelle	GO:0005515//protein binding	GO:0016129
Unigene0000980	390	0	0.0982994	2.37622	0.635097	0	0.326817	0	0.145505	0.295728	1.804	0.353564	0.358483	0	0.309409	0	0.208927	0.0801091	0	EST gb|AA721821 comes from this gene [Arabidopsis thaliana]	0	GO:0043231//intracellular membrane0bounded organelle	0	0
Unigene0000981	443	0	0	0.990914	0.0931858	0	0	0.272491	0	0	0	0.249012	0	0	0	0	0	0.14105	0	EST gb|AA721821 comes from this gene [Arabidopsis thaliana]	0	0	0	0
Unigene0000982	391	0.446288	0.392192	0	0	0.695571	0.162991	2.16111	0.145133	0	0.0899693	0	0	0	0	0	0	0	0.378245	0	0	0	0	0
Unigene0000983	223	0.391253	0	0	0.370236	0.813059	0.285782	0.270658	0	0.344795	0	0.247337	0	0	1.08224	0.156947	0	0.700505	0.13264	0	0	0	0	0
Unigene0000984	592	0.294761	0	0.247171	0.209196	0.689108	1.29181	0	0.191713	0	0.118845	0	0.236162	0.306021	0.917252	0.11824	0	0.105549	0.399713	hypothetical protein MTR_1g011300 [Medicago truncatula]	0	0	0	0
Unigene0000985	884	0	0.0867348	0.82763	2.7552	0	0	0	0.128387	0.478383	4.41715	6.70733	0	0	0	0	0.737388	0.63616	0.769583	Zinc finger homeodomain protein [Medicago truncatula]	0	0	0	0
Unigene0000986	297	0.734423	2.83976	2.79184	0.694972	0.610478	1.93119	0.406443	1.71961	2.07109	1.42133	1.02141	0.706102	0.813309	0.406295	2.00331	3.7037	1.99868	1.59347	0	0	0	0	0
Unigene0000987	922	0.946306	0.4158	0.211605	0.268642	0.393302	0.552966	0.130926	1.16941	0.917333	0.915696	0.837511	0.454907	1.17895	0.65439	1.63228	0.839559	0.677712	0.57746	PREDICTED: uncharacterized protein LOC100820117 [Glycine max]	0	0	0	0
Unigene0000988	586	0.14889	0.130842	0	0.281784	0	0	0	0	0	0	0	0	0	0	0.895881	0.556187	0.21326	0.302854	PREDICTED: uncharacterized protein LOC100820117 [Glycine max]	0	0	0	0
Unigene0000989	1930	0.565087	0.476727	0.657073	0.491954	0.939441	1.98122	2.62693	0.470442	0.239034	0.601489	0.743035	0.760614	1.56446	1.90695	0.235745	0.401074	0.323757	0.39847	Guanylyl cyclase [Medicago truncatula]	0	0	0	0
Unigene0000990	328	0	0	0	0.629289	0.27639	0.194297	0.184015	0	0.117209	0.10725	0.0840794	0.426244	0.18411	0	0.106705	0	0	0	0	0	0	0	0
Unigene0000991	1472	0.652	0.599012	0.695839	0.757198	1.01619	1.34212	1.59913	0.655367	0.652932	0.525758	0.337231	1.42468	1.92816	1.0657	0.499308	0.332125	0.339593	0.341603	0	0	0	0	0
Unigene0000992	213	0	0	0.228991	0.387618	0.638423	0.598397	0.283365	0	0	0.165155	0.129474	0	0	0.566524	0	0	0.293357	0.277735	Polynucleotidyl transferase, Ribonuclease H fold [Medicago truncatula]	0	0	GO:0003824//catalytic activity;GO:0097159	GO:0006259//DNA metabolic process
Unigene0000993	201	0	0	0	0	0.90205	0.634122	0.900848	0.564648	0.191267	1.40012	2.74408	4.86894	4.80702	10.2059	0.174125	0	0.310871	0.441474	0	0	0	0	0
Unigene0000994	376	0	0	0.648604	0.219582	0.482213	0.338986	0.642093	0	0	0.0935585	0	0.37183	0	0.32093	0	0	0.166184	0	0	0	0	0	0
Unigene0000995	350	0.373926	0.109534	0.418072	0	0.777052	0.182084	0.172448	0.324269	0.109842	0.201017	0	0	0	0	0	0.232804	0	0	0	0	0	0	0
Unigene0000996	720	0	0	0.270972	0.458681	0	0.177026	0	0	0	0	0	0	0	0	0	0	0	0	0	0	0	0	0
Unigene0000997	648	0	0	0.15054	0.637058	0	0	0	0	0	0	0	0	0	0	0	0	0	0	0	0	0	0	0
Unigene0000998	581	0.300342	1.05575	1.5111	0.63947	0.936207	0.877512	1.14273	0	0	0	0.0474665	0	0.103938	0	0	0.0701217	0	0.0509101	0	0	0	0	0
Unigene0000999	270	0.323146	0.283976	1.44519	0.611575	1.17517	0.708103	1.11772	0	0.56955	1.04231	1.53211	0.776712	0.67098	1.34077	0.129626	0.905349	0.115713	1.09551	TNP2 [Medicago truncatula]	0	0	0	0
Unigene0001000	410	0	0	0.237927	0.805489	0.995005	0.777186	0	0.415223	0.375069	0.2574	0.269054	0	1.32559	0.147158	0.341455	0.0993676	0.152403	0.21643	0	0	0	0	0
Unigene0001001	316	2.07079	0.363957	0.771757	0.391911	1.29099	1.41172	0.382005	0.359159	0.851621	0.445291	0.261817	0.442431	0.191102	0.763732	0.443026	0.386779	0.988688	0.561622	0	0	0	0	0
Unigene0001002	294	0.296767	0.521589	0.331803	0	0.462531	0.216766	0	0	0.130764	0.119653	0	0	0	0	0.119045	0.138574	0.106267	0	0	0	0	0	0
Unigene0001003	467	0.280244	0.738825	0.62666	0.441984	0.582373	0.545861	0.775462	0.243028	0.164645	0.301311	0	0.149688	0	0	0.299778	0.785153	0.133801	0.253351	0	0	0	0	0
Unigene0001004	466	0.280846	0.246803	0.41867	0	0.486352	0	0.388563	0	0	0.0754893	0.118361	0.150009	0.259177	0	0.150211	0.0874264	0	0	0	0	0	0	0
Unigene0001005	293	0.29778	0	0.166468	0.986243	0.309406	1.08753	0.205996	0	0.13121	0.120061	0.188246	0.477161	0.206103	0	0	0.278094	0	0	0	0	0	0	0
Unigene0001006	234	0.559291	0.491497	1.0422	0.352832	0.19371	0.272347	0.257935	0.970036	1.47864	0.601333	0.23571	0.896206	0.258069	0	1.19655	0.870528	0.133515	0.379215	PREDICTED: retinoblastoma0related protein 10like [Cicer arietinum]	0	GO:0043231//intracellular membrane0bounded organelle;GO:0044444//cytoplasmic part	GO:0005515//protein binding;GO:0003676//nucleic acid binding	GO:0006366//transcription from RNA polymerase II promoter;GO:0044786;GO:0044772;GO:0009566//fertilization;GO:0048827//phyllome development;GO:0045165//cell fate commitment;GO:0051301//cell division;GO:0010564//regulation of cell cycle process;GO:0019827//stem cell maintenance;GO:0000904//cell morphogenesis involved in differentiation;GO:0016049//cell growth;GO:0048229//gametophyte development;GO:…
Unigene0001007	303	0.575904	0.379572	0.965842	0	1.19678	0.841311	0	0.187284	0	0.232198	0	0.230707	0.797204	0	0	0	0.103111	0.488098	pol [Pisum sativum]	0	0	GO:0046914//transition metal ion binding;GO:0003676//nucleic acid binding;GO:0034061	GO:0006260//DNA replication
Unigene0001008	271	0.48293	0.141464	0.179982	1.06631	0.669048	0.470327	1.11359	0	0	0.519233	0.712348	0	0	0.667913	0.64574	0.150335	0.461144	2.07379	0	0	0	0	0
Unigene0001009	227	0.192179	0	0.214868	0.363712	0	0	0.531778	0.499975	0	0	0	0.307948	0.266027	0	0.308362	0.358949	0	0	0	0	0	0	0
Unigene0001010	390	1.3423	0.786396	1.37571	0.952646	1.27848	2.12431	2.7857	1.01854	0.690031	1.353	0.848555	0	0.619366	1.08293	1.0769	1.25356	1.7624	0.682587	0	0	0	0	0
Unigene0001011	708	0.308084	0.216592	0.55113	0.116614	0.832294	1.26018	2.13124	0.160303	0.217201	0.645924	0.58428	0.592408	0.767647	2.3009	0.197735	0.230174	0	0.250667	0	0	0	0	0
Unigene0001012	640	1.84042	1.67723	1.82906	1.74156	1.20403	1.39408	0.75446	2.12802	2.10244	2.14366	2.3269	3.93211	2.54763	1.22555	1.69527	1.08218	1.61094	1.34029	0	0	0	0	0
Unigene0001013	1004	0.0869018	0.0763681	1.2631	5.01626	0	0	0.120233	0.339126	0.382914	7.84848	6.09793	0	0	0	0.0697193	0.365206	3.11181	2.5631	src2 protein [Glycine max]	0	0	0	0
Unigene0001014	311	0.280545	0.862886	0	0.929162	0.582997	0.204917	0.388147	0	0	0	0	0.224772	0	0	0	0	0	0	0	0	0	0	0
Unigene0001015	257	1.18822	0.895022	0.569358	0.803139	0.881868	0.495948	2.34851	0	0.44877	0.547518	0.107308	1.088	0.704921	0.939063	1.36183	0.317048	0.243133	0.46037	0	0	0	0	0
Unigene0001016	383	0.683416	0.300288	0.2547	0.215568	0	0.33279	1.10313	0.29633	0.301133	0.183697	0.432032	0.547552	0	0.157532	0.822433	0.42549	0.407866	0.0772291	0	0	0	0	0
Unigene0001017	343	0	1.56477	0.284402	0.120354	1.32152	1.1148	0	0.165443	0.33625	0.10256	0.643219	0.203802	0.352118	1.23132	0.102038	0.593888	0	0.258706	0	0	0	0	0
Unigene0001018	245	0	0	0	0.168495	0.370025	0	0.246354	0	0	0	0	1.71194	2.21834	1.72385	0	0	0	0	Receptor0like protein kinase [Medicago truncatula]	0	0	GO:0016772//transferase activity, transferring phosphorus0containing groups	GO:0006796//phosphate0containing compound metabolic process
Unigene0001019	281	0	0	0	0	0.16131	0	0	0	0	0	0	0	0	0	0	0	0	0.210525	0	0	0	0	0
Unigene0001020	1333	0.0654534	0.0575196	0.292723	0.0929062	0	0	0	0	0	0.0527802	0	0	0	0	0	0.0611264	0	0	acid phosphatase class IIIB protein [Arabidopsis thaliana]	0	0	0	0
Unigene0001021	1253	0.139265	0.30596	0	0	0	0.101723	0	0.226445	0.184092	0	0.132058	0	0	0	0.0558645	0.0650291	0.199473	0.0944254	acid phosphatase class IIIB protein [Arabidopsis thaliana]	0	0	0	0
Unigene0001022	864	0.555407	0.488084	1.0726	0.477793	0.839408	1.99154	0.419144	0.656795	0.756433	0.814306	3.22382	0.566353	0.419362	0.628488	0.405082	0.235768	0.687046	0.890102	Os08g0266200 [Oryza sativa Japonica Group]	0	0	0	0
Unigene0001023	233	0	0.164536	0.41867	0.354346	0	1.6411	0	0.4871	0.164998	0.301957	0	1.20007	0.77753	0	0	0	0.268176	0	0	0	0	0	0
Unigene0001024	247	0.176618	0	0.19747	0.334262	0.367029	0.258013	0	0	0.311292	0	0	0	0.244487	0.24427	0.141697	0.164942	0.379464	0.119752	0	0	0	0	0
Unigene0001025	309	0	0.496269	0.631392	0	0.146693	0.412487	0.585988	0.367295	0.124416	0.569223	0.446246	0.452454	0	0.585775	0.226531	0.131847	0.505543	0.287172	0	0	0	0	0
Unigene0001026	254	0.343502	0.150932	0.576083	1.3002	0	0.501805	0.237625	0	0	0.138496	0.4343	0	0	0	0.413375	0.801983	0	0.232904	0	0	0	0	0
Unigene0001027	201	0	0.19073	0	0.410759	0	0	0.300283	0	0.382533	0	0	0	0	0	0	0	0	0.147158	PREDICTED: ethylene0responsive transcription factor ERF0840like [Cicer arietinum]	0	GO:0043231//intracellular membrane0bounded organelle	GO:0003676//nucleic acid binding;GO:0001071//nucleic acid binding transcription factor activity	GO:0000160//two0component signal transduction system (phosphorelay);GO:0006351//transcription, DNA0dependent
Unigene0001028	256	0	0	1.71475	1.61255	0	0	0	0	0	1.9238	0.861813	0	0.235891	0	0	0	0	0.115542	PREDICTED: pleiotropic drug resistance protein 10like [Glycine max]	0	0	GO:0032550;GO:0042626//ATPase activity, coupled to transmembrane movement of substances;GO:0015604//organic phosphonate transmembrane transporter activity	GO:0009154
Unigene0001029	288	0	0	1.52422	0.860028	0.314778	0.221282	0.209572	0.985193	2.00232	3.78652	3.3515	0	0	0	0	0.565843	6.2919	3.08112	tetratricopeptide repeat domain0containing protein [Arabidopsis thaliana]	0	0	0	0
Unigene0001030	351	0	0	0	1.76416	0	0	0	0	0	0	0.628559	0	0	0	0	0	0	1.09551	PREDICTED: transcription factor MYB1R10like [Setaria italica]	0	0	GO:0003676//nucleic acid binding	GO:0009813//flavonoid biosynthetic process;GO:0006605//protein targeting;GO:0006970//response to osmotic stress;GO:0014070//response to organic cyclic compound;GO:0010038//response to metal ion;GO:0044238//primary metabolic process;GO:0009626//plant0type hypersensitive response;GO:0009725//response to hormone stimulus
Unigene0001031	536	0.488336	0.357619	0.818983	0.385087	0.422836	0.237796	0.112606	0.105871	0.215175	0.525045	0.257258	0.130418	0	0.337695	0.130594	0	0.233153	0.110369	0	0	0	0	0
Unigene0001032	651	0.536095	1.11889	1.34862	1.01459	1.53182	2.05578	0.741712	2.17923	1.18109	1.13477	1.22851	1.71807	0.83486	1.11216	0.967717	0.938726	1.19979	1.04503	0	0	0	0	0
Unigene0001033	238	0.183297	0	1.02469	1.21416	0.190454	0	0	0	0.484596	0.591227	0.926993	0	0	0.253508	0	0.342359	0.131271	0	0	0	0	0	0
Unigene0001034	237	0.552211	0	0.823207	0.696731	0	0.5378	0.25467	0	0.486641	0	0	1.17982	0.254803	0.509154	0.590702	0	0.131825	0.374415	0	0	0	0	0
Unigene0001035	509	2.91403	3.31399	1.1499	0.56772	0	0	0	6.46627	7.6285	2.41892	0.216723	0	0.118641	0.237072	6.60101	8.40427	3.62143	0.813561	Zinc finger protein [Medicago truncatula]	0	0	GO:0043169//cation binding	0
Unigene0001036	249	0	0	0	0.165788	0	0	0	0	0.308792	0	0	0	0	0	0	0.163617	0.125472	0	0	0	0	0	0
Unigene0001037	432	0	0	0.677431	0	0.209852	0.442565	1.11772	0	0	0.0814306	0	0.64726	0.419362	0.558656	0	0	0	0	0	0	0	0	0
Unigene0001038	227	0	0	0	0	0.399366	0	0	0	0	0	0	0	0	0	0	0	0	0	0	0	0	0	0
Unigene0001039	232	0	0.33049	0	0.889684	0	0.274695	0.260159	0	0	0.151629	0.237742	0	0.520588	0	0.603433	0	0.269332	0.637473	0	0	0	0	0
Unigene0001040	251	1.39043	0.458209	0.388646	0.328935	0	0	0	0.904336	1.22533	0	0	0	0	0	1.25495	0.811568	0.124472	0	0	0	0	0	0
Unigene0001041	368	1.18545	0.625056	0.927786	0.89742	1.10857	2.77084	1.80414	0	0	0	0	0	0	0	0	0	0	0	0	0	0	0	0
Unigene0001042	1493	0.730487	1.1555	0.980074	1.93549	1.03225	1.19519	1.45535	1.17827	0.926997	1.13097	1.45925	1.21735	1.49656	1.45482	0.539169	0.845922	0.899818	1.367	Leucine0rich repeat family protein [Theobroma cacao]	0	0	0	0
Unigene0001043	444	0.294761	0	0.219707	1.67357	0.30627	0.861207	0.271877	0	0.519522	0.792297	0.248451	0.314883	0.680047	0.951224	0.157654	0.183517	0.281464	0.532951	0	0	0	0	0
Unigene0001044	267	0.816942	0.143583	1.27875	0.309223	0.339536	0.238686	0.904222	0	0.287975	0.395258	0.413154	0.523626	0	0.451946	0.262165	0.610348	0.35104	0	0	0	0	0	0
Unigene0001045	210	0	0	0.464524	0.196578	0.863391	0	0.287413	0.270224	0	0.167514	0	0.332877	0.575126	1.43654	0	0	0	0	0	0	0	0	0
Unigene0001046	772	0	0	0	0	0	0.165102	0	0	0	0	0	0	0	0	0	0	0	0	Nuclear transport factor 2 (NTF2) family protein [Arabidopsis thaliana]	0	0	0	0
Unigene0001047	758	0.0575524	0	0.257388	0	0.239198	0.168151	0.318505	0.0748643	0	0.185636	0.218296	0.276665	0	0.477584	0.184692	0	0.0824341	0.234133	Nuclear transport factor 2 (NTF2) family protein [Arabidopsis thaliana]	0	0	0	0
Unigene0001048	300	0.436247	0.383368	0	0	0.90656	0	0	0.378314	0.768892	0.23452	0.0919268	0.466027	0	0.804464	0	0.135802	0.104142	0.295788	PREDICTED: K(+) efflux antiporter 2, chloroplastic0like [Cicer arietinum]	0	GO:0009526//plastid envelope;GO:0031224//intrinsic to membrane	GO:0046873//metal ion transmembrane transporter activity;GO:0005451//monovalent cation:hydrogen antiporter activity	GO:0034220//ion transmembrane transport;GO:0006818//hydrogen transport;GO:0030001//metal ion transport
Unigene0001049	257	1.52771	0.596681	0.379572	0.160628	0.352747	0	0	1.76645	1.64549	3.28511	6.00922	0	0.469947	0.469532	2.58748	1.74377	1.94506	3.68296	PREDICTED: K(+) efflux antiporter 2, chloroplastic0like [Cicer arietinum]	0	GO:0009526//plastid envelope;GO:0031224//intrinsic to membrane	GO:0046873//metal ion transmembrane transporter activity;GO:0005451//monovalent cation:hydrogen antiporter activity	GO:0034220//ion transmembrane transport;GO:0006818//hydrogen transport;GO:0030001//metal ion transport
Unigene0001050	412	0.21177	0.465252	0.828702	1.00197	1.54027	1.23746	1.46497	0.137736	0.559873	1.19537	0.602433	1.18769	1.75888	0.878662	0.679594	0.791082	0.909977	0.93331	0	0	0	0	0
Unigene0001051	207	0.632242	0.185202	0	0.398853	0	0	0	0	0.185723	0.339884	0	0	0.29173	0	0	0	0	0	PREDICTED: cationic amino acid transporter 10like [Cicer arietinum]	0	GO:0043231//intracellular membrane0bounded organelle	GO:0046872//metal ion binding	0
Unigene0001052	319	0.547018	0.120178	0.305799	0	0.142094	0.399557	0.378412	0	0.120516	0.220552	0.172903	0.43827	0.567914	0.189137	0.329145	0.383142	0.391756	0.0927234	0	0	0	0	0
Unigene0001053	217	0	0.176667	0	0	0	1.17473	0	0	0	0	0	0	0	0	0.322572	0.187745	0	0.408923	0	0	0	0	0
Unigene0001054	386	0.452069	1.48977	0.758161	1.71114	0.704581	0.330204	0.156365	0.588053	1.09557	0.546808	0.714457	0	0.625784	1.09415	0.544027	0.738821	0.890331	0.842918	0	0	0	0	0
Unigene0001055	268	0.488336	0	0.545989	0	0.338269	0.475592	0	0	0.43035	0.131261	0.308709	0	0	0	0	0	0	0.110369	0	0	0	0	0
Unigene0001056	2260	0.501877	0.576748	0.410055	0.566248	0.641813	1.38174	0.587544	0.401749	0.782501	0.529227	0.414891	1.05165	0.961936	0.880995	0.46459	0.378564	0.276483	0.274847	0	0	0	0	0
Unigene0001057	226	0	0	0	0.182661	0.401133	0.281988	0	0.502187	0	0	0	0.30931	0	0	0	0.180269	0	0	Cysteine0rich RLK (RECEPTOR0like protein kinase) 8 [Theobroma cacao]	0	0	GO:0046906//tetrapyrrole binding;GO:0046914//transition metal ion binding;GO:0016491//oxidoreductase activity;GO:0004672//protein kinase activity;GO:0032550	GO:0006259//DNA metabolic process;GO:0006796//phosphate0containing compound metabolic process;GO:0006464//protein modification process;GO:0044710
Unigene0001058	230	0	0	0.848261	1.97432	0	0	0	0.74018	0	2.29422	5.51561	0	0	0	0	0.531401	1.76588	3.21508	trypsin inhibitor [Pisum sativum]	0	0	GO:0016787//hydrolase activity;GO:0004866//endopeptidase inhibitor activity	GO:0019538//protein metabolic process;GO:0051346//negative regulation of hydrolase activity
Unigene0001059	213	0	0	0.686972	0	0.425615	0	0	0	0	0	0	0	0	0	0	0	0	0	0	0	0	0	0
Unigene0001060	270	1.29258	0.70994	1.80648	0.305788	0.335763	1.65224	0.447087	0.840698	0.996712	0.390867	0.408563	1.29452	0.44732	0.446924	0.648131	1.20713	0.347139	0	0	0	0	0	0
Unigene0001061	384	0.795242	0.798683	0.508073	0.430014	0.118042	1.65962	0.314358	0	0	0	0	0	0	0	0.546861	0.106096	0.162722	0.077028	0	0	0	0	0
Unigene0001062	354	0.246467	0	0.137783	0.233228	1.02436	1.08016	1.1935	0.160303	0.108601	0.496864	0	0.789877	0.852941	1.53394	0.0988675	0	0.0882557	0.250667	0	0	0	0	0
Unigene0001063	217	0.201035	0	0.449539	1.33166	0.41777	0.88105	0.834426	0	0.354328	0.162111	0.254175	0	0	0.278041	0.161286	0.37549	0.28795	0.408923	0	0	0	0	0
Unigene0001064	476	0.458243	0	0.71728	0.693804	0.190454	0.401655	0.2536	0	0	0	0	0	0	0	0.0735275	0.171179	0.131271	0.0621403	0	0	0	0	0
Unigene0001065	591	0.664336	0.84328	0.495178	0.5588	0.460183	1.07833	1.02127	0.384075	0.2602	0.654751	0.41997	0.473124	0.613078	1.12298	0.23688	0.13787	0.158592	0.350341	0	0	0	0	0
Unigene0001066	871	1.00172	1.93665	1.06398	1.27967	1.19695	1.09752	0.970144	0.716668	0.132415	0.484657	0.569925	1.04334	0.970648	1.45469	0.482192	0.795169	0.538046	0.679191	0	0	0	0	0
Unigene0001067	3196	0.778038	0.551781	0.900415	0.555412	0.907695	1.17648	0.8876	0.568181	0.649565	0.572358	0.448704	1.46545	1.71944	1.32148	0	0	0	0	Cysteine0rich receptor0like protein kinase [Medicago truncatula]	0	0	0	0
Unigene0001068	457	0.286377	0.251664	0.213457	0	0.297558	1.11561	0.264143	0.496692	0.336496	0.307904	0.241383	0.152963	0.264281	0.528095	0.153169	0	0.205093	0	0	0	0	0	0
Unigene0001069	344	1.01453	0.668665	1.1343	0.600019	0.790605	1.66734	2.10547	0.824813	0.44703	1.22714	0.481012	1.21926	1.40438	1.92931	0.712191	0.710594	1.18068	0.429924	0	0	0	0	0
Unigene0001070	278	0	0	0.17545	0	0.326101	0.458484	0.651332	0.204126	0.41487	0	0.0992015	0	0.217224	0	0	0.293099	0.33715	0.212797	0	0	0	0	0
Unigene0001071	279	0.312722	0.137408	0	0.88777	0.162466	0	0.432665	0.813579	0.275589	0	0.098846	0	0.865781	0	0	0.146024	0	0.318051	0	0	0	0	0
Unigene0001072	218	0	0.52757	0	0.189364	0.207927	0.584672	0	0	0	0	0.126505	0	0.27701	0	0	0	0	0.135682	0	0	0	0	0
Unigene0001073	422	1.44726	0.635918	0.693484	0.489115	2.14825	1.81221	2.57446	0.268944	0.637707	0.333441	0.588157	1.3252	0.5724	0.857841	1.16111	0.579252	0.370172	0.490643	0	0	0	0	0
Unigene0001074	218	2.20125	0.703427	0.671216	0.189364	0.62378	0.584672	0.830598	0.260308	0.176351	0.806835	0.379514	0.320661	0.27701	1.10706	0.160546	0	0.143314	0.135682	0	0	0	0	0
Unigene0001075	290	0.15043	0	0.504569	0	0.937821	0	0.416254	0	0	0.121303	0	0.241049	0	0.416102	0	0	0	0	Tpv201c [Phaseolus vulgaris]	0	0	GO:0046872//metal ion binding;GO:0032550	GO:0006950//response to stress
Unigene0001076	231	0.944258	0.16596	0.211147	0.536121	0	0.551769	0.261285	0	0.332854	0	0	0	0.522842	0	0.151511	0	0	0.256093	0	0	0	0	0
Unigene0001077	353	0.370748	0.543014	1.10538	0.467777	1.6693	1.08322	1.88081	0	0.217816	0.298963	0.546873	0.198029	1.36857	0.17092	0.495738	0.577064	0.442529	0.0837925	0	0	0	0	0
Unigene0001078	498	0	0.153963	0.391767	3.89603	0	0	0	0.4558	0.617584	2.54299	5.427	0.280739	0	0.484617	0	0.245426	2.4467	3.92008	Ring0H2 zinc finger protein [Medicago truncatula]	0	0	GO:0046914//transition metal ion binding	0
Unigene0001079	229	1.14301	0.16741	1.70393	0.540803	0.593817	0.834882	0	0.247804	0	0	0.481712	0.305258	0.527408	0.263471	0	0	0	0	0	0	0	0	0
Unigene0001080	229	0.190501	0	0.425983	0	0.791756	0.278294	0	0	0	0	0	0	0	0	0.152834	0.355814	0	0.129165	0	0	0	0	0
Unigene0001081	661	0.461986	0.579982	0.368949	0.749434	2.12582	2.02468	0.913113	0	0.232645	0.319316	0.208608	0.740285	0.365435	1.91684	0.211795	0.677985	0.708983	0.671228	0	0	0	0	0
Unigene0001082	591	0.369075	0.583809	0.907826	0.8382	0.383486	0.539165	1.02127	0.192038	0.1301	0.357137	0.373307	0.473124	0.715258	0.816715	0.296101	0.275741	0.105728	0.150146	gag0pol polymerase [Arabidopsis lyrata subsp. lyrata]	0	0	GO:0046914//transition metal ion binding;GO:0097159	GO:0006259//DNA metabolic process
Unigene0001083	778	0.504656	0.492761	0.564235	0.318365	0.116524	1.96594	0.698215	0.510578	0.444732	0.587807	0.460815	0.449255	0.543339	0.232653	0.359888	0.837855	0.401575	0.342171	0	0	0	0	0
Unigene0001084	463	0.565331	0.248402	0.421382	0.356642	0.293702	0.137644	0.13036	0.122564	0	0	0.119128	0	0.260856	0.130313	0.453552	0	0.337392	0.12777	0	0	0	0	0
Unigene0001085	510	0.940925	0.902042	0.765098	0.485663	0.355514	0.499838	0.236693	0.445075	0.301526	0.137953	0	0.685334	0.710449	0.828125	0.960759	0.399419	0.245039	0.289988	unknown [Lotus japonicus]	0	0	0	0
Unigene0001086	575	0.303476	0	0	0.143587	1.41896	1.77334	2.93911	0.197381	0.401161	0.489433	0.239809	1.3373	0.630138	1.88874	0	0	0.434679	0.77162	0	0	0	0	0
Unigene0001087	339	0.386059	0	0.431637	1.70483	0	0.375984	0.178044	0	0.226812	0	0	0	0	0.533936	0	0.240358	0	0.087253	copia0type polyprotein [Arabidopsis thaliana]	0	GO:0016020//membrane	GO:0097159	GO:0006259//DNA metabolic process;GO:0015696//ammonium transport
Unigene0001088	232	0	0.165245	0.210237	0.177937	0.390759	0.824086	0.260159	0.2446	0.331419	0.758147	0.118871	0.602621	0	0.520128	0.301716	0.52682	0.269332	0.127495	0	0	0	0	0
Unigene0001089	285	0.153069	0.134515	0	0.869081	0.636183	0.447223	0.423556	0.398225	0.134893	0	0.19353	1.22639	0	0.423402	0.245608	0	0.219246	0.41514	Receptor protein kinase0like protein [Medicago truncatula]	0	GO:0031224//intrinsic to membrane	GO:0004713//protein tyrosine kinase activity;GO:0016628//oxidoreductase activity, acting on the CH0CH group of donors, NAD or NADP as acceptor;GO:0032550	GO:0006796//phosphate0containing compound metabolic process;GO:0006464//protein modification process;GO:0044710
Unigene0001090	438	0.398399	0.525161	0.890868	0.471248	0.310466	1.74601	0.413403	0.777358	0.614412	0.48189	0.188891	0	0.689363	1.10201	0.799066	0.558092	0.42798	0.675314	0	0	0	0	0
Unigene0001091	250	0.348998	0.306694	1.1706	0.165125	0.90656	1.27459	1.68999	0	0.307557	0.281424	0.330936	2.23693	0.966211	1.44804	0.139996	0.162963	0.37491	0.354945	0	0	0	0	0
Unigene0001092	229	0.571503	0	0.212991	0.721071	0.197939	1.39147	0	0.247804	0.839402	0	0.361284	0.915774	0	0.526942	0.764172	0.533721	1.3643	0.25833	0	0	0	0	0
Unigene0001093	352	0.99147	1.41585	1.24709	0.820935	0.257546	1.08629	1.20028	1.28971	0.436871	0.899438	0.548427	2.38309	0.514672	1.19984	0.795434	0.578703	0.887572	0.924336	0	0	0	0	0
Unigene0001094	968	0.630936	0.950499	1.10852	1.1088	1.5921	1.11921	2.18232	0.468984	0.79431	0.290727	0.94016	2.23866	0.873383	1.12193	0.397717	0.3367	0.451855	0.672245	Os01g0253400 [Oryza sativa Japonica Group]	0	0	0	0
Unigene0001095	479	0	0	0	2.75783	0	0	0	0	0	0	0	0	0	0	0	0	0	0	lipid transfer protein 2 [Salvia miltiorrhiza]	0	0	GO:0005488//binding	GO:0051234//establishment of localization;GO:0010876
Unigene0001096	466	0.374461	0	0	0.620106	1.75087	3.00868	0.259042	0.24355	0.329997	0.679403	0.473443	2.85017	5.31312	0	0.150211	0	2.34654	0.761685	little protein 1 [Arachis hypogaea]	0	0	0	0
Unigene0001097	202	0	0	0.482921	0.408726	0.448792	0.630983	0.298796	0.280926	0	0.174149	0	0	0	0.298687	0	0.201687	0	0	0	0	0	0	0
Unigene0001098	616	0.424916	0.49788	0.0791802	0.603136	0.441507	0.413827	0	3.31639	1.12338	1.31346	1.56693	1.81569	2.25475	2.44865	4.03399	5.48941	3.19526	3.50528	NB0LRR type disease resistance protein Rps10k02 [Medicago truncatula]	0	0	GO:0032550	GO:0006950//response to stress
Unigene0001099	611	0.713989	0.878421	0.87811	0.608072	0.890239	0.31291	0.395134	0.835882	0.81797	0.806043	0.225679	0.228819	0.19767	0.394991	0.68738	0.800145	0.409068	0.145231	0	0	0	0	0
Unigene0001100	347	0	0.220961	0.281124	0.237933	0	1.46926	0.347878	0	0	0.101378	0.317902	0	0.348059	0	0	0	0	0	0	0	0	0	0
Unigene0001101	215	0	0.178311	0.453721	0.192006	0.421656	0	0.561458	0	0	0.490856	0	0	0.561751	1.12251	0.325573	0.378983	0	0.275151	0	0	0	0	0
Unigene0001102	446	0	0.171914	0.109361	0.185118	0.508162	1.85758	2.02994	0	0	0	0	0	0	0	0	0	0	0	PREDICTED: uncharacterized protein LOC101501357, partial [Cicer arietinum]	0	0	0	0
Unigene0001103	464	0	0.826224	0.946067	0.889684	0.586138	0.54939	0.390238	0.366899	0.414274	0.758147	0.416048	0.753277	0.650735	0.520128	0.377145	0.439016	0.336665	0.446231	DNA repair and recombination protein PIF1 [Medicago truncatula]	0	0	0	0
Unigene0001104	404	0.971837	0.379572	0.362191	0.306545	0.336594	0.157746	0.298796	0.421389	0.19032	0.261223	0	0	0	0	0	0.705903	0.309332	0.14643	polyprotein [Glycine max]	0	0	GO:0003676//nucleic acid binding;GO:0003824//catalytic activity	GO:0006259//DNA metabolic process
Unigene0001105	207	1.05374	0.926009	0.706884	0.199427	0	0	0	0	0	0	0	0.337701	0	0	0.169078	0	0.15093	0	0	0	0	0	0
Unigene0001106	516	1.3527	1.41163	1.41788	1.20004	0.966295	1.23506	0.701823	1.09975	1.04307	0.204523	0.374121	0.270946	0.585157	1.16928	1.2209	1.18432	0.24219	0.630555	0	0	0	0	0
Unigene0001107	207	0.421495	0.555606	0.235628	0	0.218976	0.615742	0.874736	0.274141	0.557168	0.339884	0.399682	0	0.583461	0.874417	1.18354	0.590445	0.754651	0.57157	0	0	0	0	0
Unigene0001108	212	0.205777	0.180834	0.460142	0	0.641434	0.30061	1.42351	0	0.181343	0.663736	0.390255	1.31895	4.5576	0.284598	0.33018	0.192173	0	0.139522	gag/pol polyprotein [Pisum sativum]	0	0	GO:0004175//endopeptidase activity;GO:0003676//nucleic acid binding;GO:0016891//endoribonuclease activity, producing 5'0phosphomonoesters;GO:0034061	GO:0006260//DNA replication;GO:0019538//protein metabolic process
Unigene0001109	3312	1.58061	0.833408	1.16341	1.08438	0.75273	1.07755	0.929407	0.291274	0.19733	0.223049	0.174861	0.295488	0.273497	0.291472	0.0105674	0	0	0.0178616	RNA0directed DNA polymerase (Reverse transcriptase) [Medicago truncatula]	0	0	0	0
Unigene0001110	678	1.02949	0.508895	0.719395	0.79153	1.2034	1.22195	0.534131	0.334791	0.793842	0.51885	0.488107	0.206207	0.979749	0.711915	0.877558	0.660985	0.322563	0.392638	0	0	0	0	0
Unigene0001111	235	0	0.489406	0.830213	0.526996	1.15731	0.271188	0.256837	0	0.163594	0.149694	0	0	0	0	0	0	0	0	0	0	0	0	0
Unigene0001112	262	0.666026	0.292647	0	0	0.692031	1.21621	1.38222	0.433184	0.29347	0.134267	0.210519	0	0.460979	0.460571	0.267169	0.310998	0.119246	0.338688	0	0	0	0	0
Unigene0001113	360	1.09062	1.59737	0.406458	1.26137	1.25911	1.41621	0	0.630523	1.49507	1.36803	1.45551	0.776712	0.167745	0.670387	1.55552	1.35802	0.867848	0.985959	0	0	0	0	0
Unigene0001114	249	1.9272	0.923778	0	0	0	0.511882	0	0.4558	0.154396	0	0	0	0	0	0.843352	0.490852	0.250944	0	PREDICTED: disease resistance protein At4g271900like [Vitis vinifera]	0	0	0	0
Unigene0001115	226	0.386059	0.339264	1.94237	0	0.601699	0.281988	0.801196	0.75328	0.510327	0.155655	0.244053	0.61862	1.06882	0.533936	0.309726	0.540806	0.967689	0.392638	PREDICTED: cytochrome P450 71A10like [Cicer arietinum]	0	0	GO:0046914//transition metal ion binding;GO:0016491//oxidoreductase activity;GO:0046906//tetrapyrrole binding	GO:0044710
Unigene0001116	341	0.76759	0.674548	0.28607	0.242119	1.19634	1.682	0.884997	0.499241	0.225482	0.412645	0.727866	0.204997	0.885457	0	0	0.119474	0.183241	0.0867412	0	0	0	0	0
Unigene0001117	737	0.473538	0.624208	0.529444	0.672152	1.10706	0.864712	0.818952	0.846972	0.886782	1.43194	0.374193	0.379398	0.491627	0.573058	0.284932	0.442233	0.508698	0.40134	0	0	0	0	0
Unigene0001118	232	0.188037	0.826224	0.420474	0.355874	0.781518	0	0.260159	0.2446	0.331419	0.151629	0.237742	0	0	0.520128	0.452574	0.175607	0	0	0	0	0	0	0
Unigene0001119	299	0.437706	0.256433	1.14189	0.414194	0	0	0	0	0.514309	0.117652	0.184468	0	0	0	0.351161	0.272513	0	0	0	0	0	0	0
Unigene0001120	376	0.348069	0.10196	0.389162	0.219582	0.120553	0.677971	0.321047	0.301846	0	0.187117	0.146692	0.185915	0.160607	0	0	0	0	0	0	0	0	0	0
Unigene0001121	208	0.209734	0	0.468991	0	0	0	0	0	0	0	0	0	0	0	0	0	0	0	0	0	0	0	0
Unigene0001122	928	0.564112	0.908846	0.73583	0.667263	1.95379	2.6096	0.845515	1.5899	0.372846	0.606517	0.445766	1.65721	1.49669	1.75543	0.905149	0.790229	0.706997	0.509979	0	0	0	0	0
Unigene0001123	597	0.730732	0.128431	1.0621	0.622332	0.531484	0.106749	0.2022	0	0.257585	0.76602	0.692915	1.05383	0.708069	0.505317	0.527624	0.818909	0.941986	0.297274	0	0	0	0	0
Unigene0001124	581	0.300342	0	0.3358	2.77104	0.702155	0.767823	0.831075	0	0.264679	0	0.569598	0.481267	0.207877	0.623079	0	0	0	1.27275	PREDICTED: biorientation of chromosomes in cell division protein 10like 10like [Cicer arietinum]	0	0	0	GO:0006694//steroid biosynthetic process;GO:0009664//plant0type cell wall organization
Unigene0001125	859	1.47278	0.803332	2.15768	1.10532	0.949831	1.11285	0.632376	1.12305	0.984612	0.573332	0.288943	0.813785	1.05451	1.05358	1.42604	1.65998	0.581933	0.309906	0	0	0	0	0
Unigene0001126	232	0.188037	0	1.05119	0	0.390759	1.37348	0	0	0.662838	0.151629	0	0	0	0.260064	0	0	0	0	0	0	0	0	0
Unigene0001127	549	0.635697	0.628472	0.177687	0.977518	0.825647	0.92866	0.769577	0.310093	0.140053	0.320383	0.1507	0	0.219993	0	0.573756	0.742089	0.341448	0.323265	0	0	0	0	0
Unigene0001128	338	0.258134	0.45369	0.577219	0.122134	0.268213	0.377096	0.357141	1.00735	1.13741	0.520385	0.326367	0.413634	0.178663	0	0.103548	0.120535	0	0.0875111	0	0	0	0	0
Unigene0001129	598	0.72951	0.320542	0.163127	0.0690323	0.151599	0.426283	0	0.18979	0.128577	0.764739	0.184468	0.701379	0	0.201789	0	0	0	0	0	0	0	0	0
Unigene0001130	472	0.18485	0	0.413348	0.349842	0.192068	0	0	0	0.162901	0.298119	0.116856	0	0	0	0	0	0	0	0	0	0	0	0
Unigene0001131	369	0.709345	1.24672	0.528726	1.00686	0.614201	1.20896	0.654274	0.461359	0.312558	0.762667	0.224212	0.378884	1.30923	1.7986	0.474242	0	0.508009	0.320637	0	0	0	0	0
Unigene0001132	344	0	0.222888	0.283576	0.240008	1.18591	0.370519	0	0	0	0.102262	0	0.20321	0	0	0.305225	0	0	0	copia0type polyprotein [Rosa rugosa]	0	0	GO:0046914//transition metal ion binding;GO:0097159	GO:0006259//DNA metabolic process
Unigene0001133	274	0.477643	0.979407	0.534033	0.753309	2.1506	1.39553	0.660841	0.828425	0.701544	0.641934	0.10065	0.510249	1.32237	0.2202	0.894137	0.297377	0.342072	0.539758	0	0	0	0	0
Unigene0001134	202	0	0.379572	0.482921	0	0.224396	0.630983	1.19518	0	0.19032	0	0.136525	0.34606	0	0.298687	0	0	0.309332	0	0	0	0	0	0
Unigene0001135	263	0.99524	1.45767	1.11274	0.941779	0.51705	0.72695	0.458987	0.431537	0.292354	0.267513	0.314578	1.59477	0.918452	1.37646	0.665382	0.774538	0	0.3374	0	0	0	0	0
Unigene0001136	455	0	0.337027	1.71517	0.725826	0.796976	0.420193	0.132652	0.748314	0.253481	0.773143	0.242444	0	0.265443	1.06083	0.307684	1.07448	0.343325	0.195025	legA class precursor [Pisum sativum]	0	0	0	0
Unigene0001137	815	0	0.141117	1.67571	1.57021	0	0	0	0.139257	0.70757	2.58979	4.33127	0	0	0	0	0.0999772	0.920026	2.25016	0	0	0	0	0
Unigene0001138	305	0	0	0	1.08279	0	0	0	0	0	0	0.542519	0	0	0	0	0	0.102435	0.193959	HAT family dimerization domain containing protein [Medicago truncatula]	0	0	GO:0005488//binding	0
Unigene0001139	507	0.516269	0.529305	1.34684	1.62845	0.625831	0.502795	0.714282	0.895418	0.985759	1.94277	1.08789	1.79241	0.714653	0.357011	0.41419	0.160713	0.369734	0.291704	ABC transporter A family member [Medicago truncatula]	0	0	GO:0017111//nucleoside0triphosphatase activity;GO:0032550	GO:0009154
Unigene0001140	734	0	0	2.19288	0	0	0	0	0	0.0523769	0.479264	0	0	0	0	0	0	0	0	0	0	0	0	0
Unigene0001141	248	0	0	0	0	1.09665	1.02789	0.486748	0	0	0	0	0	0	0	0	0	0	0	0	0	0	0	0
Unigene0001142	505	0	0.607315	0.0965842	0.980942	0.179517	1.38816	0.358555	0	0	0.139319	0.05461	0.276848	0.717484	0.358425	0.207915	0	0.123733	0.0585718	0	0	0	0	0
Unigene0001143	726	0.420624	0.264027	1.00775	0.454891	0.624353	1.93119	0.332544	0.312656	0.211816	0.387636	0.531808	0.57772	0.582255	1.32969	0.674914	0.16835	0.559439	0.529647	0	0	0	0	0
Unigene0001144	220	0.198294	0.522774	0.886818	0.75057	0.206036	1.15871	1.37175	0.257941	0.349496	0.3198	1.12819	0	0.274492	0.822747	0.318174	0.37037	0.852069	0.941142	0	0	0	0	0
Unigene0001145	236	0.554551	0.487332	0.620021	0.699683	0.192068	0.270039	0	0	0	0	0	0	0	0	0	0	0.132384	0.250667	hypothetical retrotransposon [Ipomoea batatas]	0	0	GO:0046914//transition metal ion binding	0
Unigene0001146	1006	0.780561	0.495406	0.678778	0.492421	0.946211	0.253397	0.479974	0.789721	0.420369	0.314714	0.246722	1.32026	0.720336	1.01957	0.452274	0.769457	0.217393	0.352828	0	0	0	0	0
Unigene0001147	448	0.0973766	0	0.326618	0.184292	0	0	0.26945	0.506671	0	0.157045	0	0.312072	0.134795	0.269352	0.312492	0.181878	0	0.132048	0	0	0	0	0
Unigene0001148	265	1.48159	1.88067	1.10434	0.467336	0	0	0	0	0	0	0	0	0	0	0	0	0.235793	0	0	0	0	0	0
Unigene0001149	2659	0.771102	0.619963	0.880482	0.838357	1.02282	1.65375	0.95336	0.896344	1.08437	0.568881	0.85047	1.15674	1.11283	0.998395	0.434363	0.796735	0.810731	0.867673	0	0	0	0	0
Unigene0001150	310	0.422175	0.247334	0.629355	0.798993	0.438658	0.411157	0	0	0	0.567387	0.0889614	0.225497	0.584402	0	0	0.262843	0.604694	0.286246	0	0	0	0	0
Unigene0001151	204	0	0	0	0.202359	0	0.312398	2.07107	0	0	0.344882	0.135186	0.342667	0	5.0279	0	0	0	0	hydroxyproline0rich glycoprotein DZ0HRGP [Volvox carteri f. nagariensis]	0	0	0	0
Unigene0001152	363	0.480713	0.211222	0.268733	0.227445	0.374612	0.351126	0.166272	0.156328	0.105908	0.484545	0.30389	0	0.332717	0	0	0.448933	0.0860676	0	0	0	0	0	0
Unigene0001153	702	0.124287	0.163832	0.27792	1.47013	0.968548	2.45113	0.171957	0.323345	0.219058	0.300667	1.13926	0.697049	0.688185	0.085947	0.0997125	0.406246	0.489555	1.17978	Lysine/histidine transporter [Medicago truncatula]	0	GO:0031224//intrinsic to membrane	GO:0046943//carboxylic acid transmembrane transporter activity	GO:0006865//amino acid transport
Unigene0001154	251	0.347607	0.305472	0.388646	0.65787	0.361179	0.253902	0.480931	0	0	0	0	0	0	0	0.139439	0	0	0	0	0	0	0	0
Unigene0001155	206	0.21177	0.186101	0.947088	0	1.54027	0.928096	0.292994	0	0	0	0	0	0	0	0	0	0	0	RNA0directed DNA polymerase (Reverse transcriptase), Ribonuclease H0like protein [Theobroma cacao]	0	0	0	0
Unigene0001156	373	0.116956	0.308339	0.653821	0.110674	0.607614	1.19599	1.1327	0	0.515343	0.188622	0	0	0.161899	0	0.0938313	0	0	0.237899	0	0	0	0	0
Unigene0001157	421	0	0	0.23171	0	0	0.302752	0	0	0	0	0	0	0.28688	0	0	0	0	0	0	0	0	0	0
Unigene0001158	503	0.346916	0.457298	0.193936	0.574492	0.360461	1.26698	0.239987	0	0.458584	0.139873	0.274135	0.277949	0.480224	0	0.417484	0.323982	0.621124	0.235219	0	0	0	0	0
Unigene0001159	230	0.189673	0	1.06033	0.538452	1.18247	0.831252	0	0.493453	0.16715	0.611791	0.479618	0.303931	0.787672	0.52465	0	1.0628	0.271674	0.643017	0	0	0	0	0
Unigene0001160	208	0.419468	0.552934	0.937981	0.198468	0.65377	1.22556	0.290177	0.272823	0.36966	0	0.39776	0.336077	0.290328	0	0.33653	0	0.150204	0	0	0	0	0	0
Unigene0001161	541	0.161274	0	0.360629	0	0.921642	0.588995	0.669391	0.209786	0.142124	0	0	0.258425	0.446493	1.00372	0.0646933	0.150613	0.0577496	0.0546742	Retrotransposon gag protein [Asparagus officinalis]	0	0	0	0
Unigene0001162	223	0	0.171914	0	0	0.813059	0.285782	1.08263	0	0	0	0	0.313471	0	1.08224	0	0	0	0	PREDICTED: cationic amino acid transporter 10like [Cicer arietinum]	0	0	GO:0005488//binding	0
Unigene0001163	554	0.708705	0.8304	0.528249	0.44709	0.163639	1.61049	1.08947	0.204863	0.277578	0.571484	0	0.126181	0	0	0.315876	0.220618	0	0	hypothetical protein GUITHDRAFT_113400 [Guillardia theta CCMP2712]	0	0	0	0
Unigene0001164	364	0.479392	0.737246	0.803984	0.22682	0.871693	0.875402	0.497446	0.155899	0.105617	0.289929	0.378819	0	0.663607	0.828775	0	0.559625	0	0.325041	0	0	0	0	0
Unigene0001165	406	0.53725	1.13311	1.6819	1.93188	1.45139	1.72666	1.33796	0.978398	0.662838	1.03974	1.01889	0.344355	0.892436	0.594432	0.603433	1.10381	0.846473	0.801395	0	0	0	0	0
Unigene0001166	631	0.138272	0.850578	1.93245	1.96266	0.215506	0.302992	1.14783	2.69796	2.13243	2.78748	2.22897	0.221566	0.765619	2.19921	1.71945	3.55109	2.27759	3.37507	Plasma membrane0like protein isoform 1 [Theobroma cacao]	0	0	0	0
Unigene0001167	395	0.220885	0.582331	0	0.209019	1.49181	0.8067	2.59763	0.143664	0.194656	0.178116	0.698178	1.23881	2.29322	1.37472	0	0.103141	0.15819	0.898595	0	0	0	0	0
Unigene0001168	275	0.475906	0	0	0.300228	0	0	0.219479	0.206353	0	0	0.200567	0	0	0	0	0	0	0	polyprotein0like [Solanum chilense]	0	0	GO:0046872//metal ion binding;GO:0097159	GO:0009987//cellular process
Unigene0001169	339	0.257373	0.339264	0.719395	0.608869	0	0	0	1.00437	0.340218	0.41508	0.162702	0	0	0.355958	0	0.240358	0	0	0	0	0	0	0
Unigene0001170	276	0	0.277803	0.706884	0	0.492696	0.461806	0.656052	0	0	0.254913	0	0	0	0	0	0	0	0	0	0	0	0	0
Unigene0001171	403	0.32475	0.475642	0.726179	0.61461	0.224953	0.790686	0.748844	0.563247	0	0.523742	0	0	0.299693	0.149714	0.0868464	0	0	0.0733964	0	0	0	0	0
Unigene0001172	460	0.853527	0.666727	1.27239	0.807678	1.08393	0.969794	1.83695	0.246727	0.501451	0.535317	0.659475	1.67162	0.787672	2.0986	0.15217	0.2657	0.339593	0.643017	0	0	0	0	0
Unigene0001173	206	0	0.558303	0.473544	0	0.440078	0.309365	0	0	0.373249	0.170767	0.267748	0.678681	0	0.585775	0.509695	0.395541	0	0	0	0	0	0	0
Unigene0001174	273	0	0	0.535989	0.907282	0.332073	0	0.442174	1.03932	0.704114	0.128857	0.202037	0.768177	0.884809	0	0.512807	0	0	0.216694	0	0	0	0	0
Unigene0001175	314	0.277864	0.366275	0	0.262938	0	0.608879	0	0.180723	0	0.112032	0.0878281	0	0.192319	0	0	0.259495	0.0994985	0	0	0	0	0	0
Unigene0001176	1860	0.633262	0.412223	1.12759	0.577051	0.779837	1.74742	0.713897	0.793239	0.72342	0.529561	0.548595	0.751657	0.974003	0.227066	0.790302	0.919952	0.470318	0.508882	0	0	0	0	0
Unigene0001177	257	0.339492	0.14917	0	0.321255	0.176374	0.495948	0	0.220806	0.14959	0	0	0	0	0	0	0	0	0	0	0	0	0	0
Unigene0001178	888	0.63865	0.345376	0.933756	0.418392	0.612541	0.430603	0.271877	0.383426	0.389641	0.316919	0.403732	0.472325	0.544038	0.679446	0.394134	0.229396	0.140732	0.166547	0	0	0	0	0
Unigene0001179	677	0.38663	0.396392	0.504321	0.670745	0.736497	0.753079	0.713226	1.1735	0.624654	0.623539	0.122207	0.826045	0.535198	0.267362	0.568671	0.421248	0.599931	0.174764	0	0	0	0	0
Unigene0001180	426	0.716838	1.43988	0.801467	0.678332	1.06404	1.19679	0.56673	0.666046	0.81221	0.578042	0.517897	1.64094	1.41756	1.55794	0.492945	0.669448	0.513375	0.486036	0	0	0	0	0
Unigene0001181	461	0.662414	0.914761	1.26963	0.537284	0.786603	2.21186	1.70204	0.86167	1.25091	0.610464	0.5384	0.151636	0.65497	1.04702	0.3796	0.530248	0.813255	0.449135	0	0	0	0	0
Unigene0001182	564	0	0	0	0	0.241107	0	0	0	0	0	0.0977944	0	0	0	0	0	0	0	PREDICTED: phosphate transporter PHO1 homolog 10like isoform 2 [Glycine max]	0	GO:0031224//intrinsic to membrane	0	GO:0009267//cellular response to starvation;GO:0015698//inorganic anion transport;GO:0006351//transcription, DNA0dependent;GO:0009247//glycolipid biosynthetic process
Unigene0001183	883	0.592861	0.607831	0.276189	0.794771	0.564675	0.79391	0.683542	0	0.609541	0.796784	1.31175	0.633333	1.16263	0.546635	0.198183	0.599807	0.459969	1.6414	PREDICTED: phosphate transporter PHO1 homolog 10like isoform X2 [Cicer arietinum]	0	0	0	0
Unigene0001184	433	0.403	0	0.788511	0.47669	0.209367	0.147181	0.139392	0.393167	0	0.487455	0.636906	0.161441	0	0.418024	0.161659	0.188179	0.577229	0.0683112	0	0	0	0	0
Unigene0001185	555	0.471618	0.138151	0.263649	0.520665	0.816721	1.03345	0.326253	0.102247	0.207809	0.316919	0.645972	0.251907	0.87046	0.434845	0.378369	0.44044	0.337757	0.373065	hypothetical protein MTR_2g082890 [Medicago truncatula]	0	0	0	0
Unigene0001186	552	0.474182	0.208352	0.618524	0.74785	0.246348	0.923613	0.218684	0.616816	0.069646	0.191185	0.799363	0.253276	0.437596	0.437209	0	0.147611	0.169796	0.535847	0	0	0	0	0
Unigene0001187	305	0.429095	0	1.11943	0.541394	0.297233	1.88054	0.197891	2.04662	0.882335	0.576689	0.0904198	1.14597	0.791976	0.593457	0.114751	0.400728	0.204869	0	0	0	0	0	0
Unigene0001188	211	0.413504	0.363382	0.462322	0	0	0.302035	0.858153	0	0	0	0.130702	0	0.2862	0.285947	0	0	0.148069	0	0	0	0	0	0
Unigene0001189	206	0	0.186101	0.710316	0	0.220039	0	0	0	0	0	0	0	0.293147	0	0	0.395541	0	0.287172	0	0	0	0	0
Unigene0001190	360	0.242359	0.638946	0.948403	0.11467	0.251822	2.12431	1.1736	0.945785	0.213581	0.195433	0.306423	1.94178	1.34196	0.335193	0.388879	0.339506	0.347139	0.739469	0	0	0	0	0
Unigene0001191	513	0.425192	1.04623	0.285234	0	0.353435	0.8696	0.235309	0.995563	0.374704	0.274292	0.32255	0	0.588579	0.470447	0.886916	0.873583	0.121803	0.115317	0	0	0	0	0
Unigene0001192	286	0.457602	0.938313	1.02325	0.577361	0	1.11415	0.633113	0.396833	0	0	0.28928	0.48884	0	0.632883	0	0	0.218479	0	0	0	0	0	0
Unigene0001193	399	0.43734	0.576493	0.488973	0.620772	0.681624	0.479168	0.605081	0.711117	0.674467	0.528993	0.622061	0	0.302698	0.453645	0.438585	0.510535	0	0.296529	0	0	0	0	0
Unigene0001194	218	0	0.52757	0.223739	0.189364	1.03963	0.584672	0	0.520616	0.176351	0	0.253009	0.320661	0.83103	0	0.160546	0.373768	0.429943	0	0	0	0	0	0
Unigene0001195	231	0.188852	0	1.47803	0.714828	0.981126	0.827653	2.61285	0.245658	0.166427	0	0	0.907845	0.784262	0.783569	0.303022	0.5291	0.270498	1.28047	0	0	0	0	0
Unigene0001196	561	0.933149	0.20501	0.86943	0.515097	1.77757	0.454398	1.07588	0	0	0.188118	0.589904	0.373819	0.753507	0.322646	0	0	0.111382	0	0	0	0	0	0
Unigene0001197	330	0.66098	0	0	0.25019	0	0	0.365799	0	0.116499	0	0	0.211831	0.365989	0.548498	0	0.246913	0	0	0	0	0	0	0
Unigene0001198	490	0.62321	0.312953	0.895868	0.673981	0.277519	0.650299	0.369531	0.231621	0.549209	1.14867	0.67538	0.570646	0.492965	0.123132	0.285707	0.415722	1.14768	0.482919	HAT family dimerization domain containing protein [Medicago truncatula]	0	0	0	0
Unigene0001199	437	0.698794	0.964999	0.558067	0.283396	0.933529	1.89584	0.552465	0.259712	0.43987	0.402494	0.567969	1.11975	1.1055	1.51873	0.480537	0.186456	0.714932	1.01529	0	0	0	0	0
Unigene0001200	946	0	0	0	0	0.191662	0.673671	1.40365	0	0	0	0	0	0	0.0637789	0	0	0	0.0625344	PREDICTED: zinc finger CCCH domain0containing protein 660like [Cicer arietinum]	0	0	0	0
Unigene0001201	907	0	0	0.107552	0	0.0999515	0	0	0	0	0	0	0	0.13316	0	0	0	0	0	PREDICTED: zinc finger CCCH domain0containing protein 660like [Cicer arietinum]	0	0	0	0
Unigene0001202	227	0	0	0.429736	0.545568	0	0	0	0	0	0	0	0	0	0	0	0	0	0	PREDICTED: uncharacterized protein LOC101498164 [Cicer arietinum]	0	0	0	0
Unigene0001203	327	0.266818	0.468951	0	0.252485	0	0.584672	0	0.694154	0	0.215156	0	0	0.369347	0	0.963278	0.622947	0	0.0904549	0	0	0	0	0
Unigene0001204	311	0.140272	0	0	0.53095	0	0	0	0	0.123616	0.339338	0	0	0	0	0.112537	0	0	0	0	0	0	0	0
Unigene0001205	1127	0	0	0.735737	0.695958	0.884842	0.622025	1.28533	0	0	0	0	0	0	0	0	0	0	0.0262456	OSIGBa0146N20.7 [Oryza sativa Indica Group]	0	0	GO:0043167//ion binding	0
Unigene0001206	241	0.181015	0.159074	0	0	0.564249	1.05775	0	0.47093	0	0.145967	0.68659	0	0.250573	0	0.290449	0.169049	0.259274	0.245467	0	0	0	0	0
Unigene0001207	424	0.205777	0.180834	0	0	0.320717	0.150305	0	0	0	0.082967	0	0	0	0.142299	0	0.0960866	0.0736852	0.139522	0	0	0	0	0
Unigene0001208	336	0	0	0	0	0.539619	0	0	0	0	0	0	0	0	0	0	0	0	0	0	0	0	0	0
Unigene0001209	1046	0.33365	0.219905	1.67868	1.8549	1.08337	0.974827	2.07729	0.651018	0.551309	2.25328	2.84744	3.14101	1.55878	3.86466	0.602279	2.25905	1.6129	2.37535	PREDICTED: NADP0dependent malic enzyme 4, chloroplastic0like [Cicer arietinum]	ko00620//Pyruvate metabolism;ko00710//Carbon fixation in photosynthetic organisms	0	0	0
Unigene0001210	379	0	0	0	4.90148	0	0.336302	0	0	0	0.0928179	19.8649	0	0	0	0	0	0	0.234133	0	0	0	0	0
Unigene0001211	253	0.517289	0	0.192787	0.326335	1.79162	0.755683	0.715693	0	0.30391	0.139043	0.327012	0.276301	0.238689	0.476955	0.138336	0	0.123488	0	0	0	0	0	0
Unigene0001212	365	0.478079	0.105032	0.26726	1.47029	0.248373	0	0.496083	0.310943	0	0.0963781	0.0755562	0	0	0	0.287664	0.781329	0.256788	0.405188	F7G19.9 [Arabidopsis thaliana]	0	0	GO:0003676//nucleic acid binding	0
Unigene0001213	370	0.117905	0	1.05459	0.111571	0.122508	0	0.163126	0	0.207809	0.570454	0.14907	0	0.326423	0.489201	0.378369	0.33033	0.168879	0.0799426	F7G19.8 [Arabidopsis thaliana]	0	0	GO:0003676//nucleic acid binding	0
Unigene0001214	343	0.8903	0.335307	0.568805	0.481415	0.264303	1.1148	0.351935	0.330887	0.560417	0.20512	0.0804024	0.815208	1.23241	0.703613	0.408153	0.712666	0	0.517413	0	0	0	0	0
Unigene0001215	717	0	0	3.46935	1.66968	0	0	0	0.15829	0.643424	2.30595	0.846188	0	0	0	0	0.568211	0.697183	2.06268	0	0	0	0	0
Unigene0001216	209	0	0	0.233373	0.395037	0	0	0	0	0	0	0.263905	0	0	0	0	0	0	0.141525	0	0	0	0	0
Unigene0001217	340	0	0	0	1.33557	0	0	0.71008	1.33523	1.80916	4.55245	3.00114	0	3.72986	1.41964	0.720569	1.91721	5.32961	3.65385	Seed specific protein Bn15D18B [Medicago truncatula]	0	0	0	0
Unigene0001218	370	0.117905	0	0.263649	0.446285	0.612541	0.344483	0.326253	0	0	0.190151	0	0	0	0	0	0	0	0.0799426	PREDICTED: chaperone protein DnaJ0like, partial [Cucumis sativus]	0	0	GO:0046914//transition metal ion binding;GO:0003676//nucleic acid binding;GO:0034061	GO:0006260//DNA replication
Unigene0001219	326	0.66909	0.117597	1.49617	0.506519	1.39043	0.586466	0.555431	0	0.70757	0	0.507571	0	1.11144	0.185076	0.429437	0.499886	0.383344	0.0907324	0	0	0	0	0
Unigene0001220	418	0	0.0917148	0.466747	0.395037	0	0.304925	0.433183	0.135759	0.183946	0	0.263905	1.33788	2.16704	2.30947	0.0837299	0	0.0747429	0	0	0	0	0	0
Unigene0001221	297	0.440654	0.25816	0.328451	0.138994	1.06834	0.429153	1.21933	0	0	0	0	0	0	0.203147	0	0	0	0	0	0	0	0	0
Unigene0001222	478	0.18253	0	0.612239	0.0863626	0.853457	0.666624	0.883886	0	0	0	0.115389	0.146243	0.25267	0	0	0	0.261444	0	0	0	0	0	0
Unigene0001223	357	0.244396	0.214772	0	0	0.253939	0.53554	0.845333	0.476866	0.430752	0	0	0	0.507464	0	0	0	0	0	PREDICTED: cationic amino acid transporter 10like [Cicer arietinum]	0	0	0	0
Unigene0001224	345	0	0	0	0.119656	0	4.80279	0	0	0	0	0.159873	0	10.6773	0.174883	0	0	0	0	Embryonic abundant protein0like protein [Medicago truncatula]	0	0	0	0
Unigene0001225	516	0.169088	0.222888	0.378101	0.400013	1.14199	1.11156	0.467882	0	0	0	0.106892	0	0	0	0	0.15791	0	0.0573232	0	0	0	0	0
Unigene0001226	344	0	0	0.141788	0	0.131768	0	0.350912	0	0	0	0	0	0	0	0.101742	0	0	0	0	0	0	0	0
Unigene0001227	221	0	0.17347	0.441403	0.186793	0	2.59531	0	0	0	0	0	0	0	0	0	0	0	0	0	0	0	0	0
Unigene0001228	279	0	0	0.174821	0	0.487398	0.685261	0.216333	0.203395	0	0	0	0.501105	0.43289	0.432508	0.376334	0	0	0.106017	0	0	0	0	0
Unigene0001229	268	0.813894	0.572191	0	0	0	0	0	0	0	0	0	0	0	0	0.261187	0	0.34973	0	0	0	0	0	0
Unigene0001230	276	0.158061	0	0	0	0	0	0	0	0	0.127457	0	0	0.218798	0	0	0	0	0.107169	0	0	0	0	0
Unigene0001231	231	0	0.66384	0.844589	0.178707	1.17735	0.827653	0	1.22829	0.499281	0.456857	0.358156	0.60523	1.04568	0.522379	0.909067	0.881834	0.811494	0.38414	0	0	0	0	0
Unigene0001232	1323	0.428663	0.550566	1.10601	0.468042	0.719492	0.674384	0.364969	0.386035	0.668349	0.425433	0.0833803	0.898239	0.639029	0.364836	0.476178	0.615884	0.165304	0.223573	0	0	0	0	0
Unigene0001233	645	0.338176	0.594369	0.831822	0.768025	0.773036	0	0.561458	0.35192	0.715249	0.163619	0.427566	0.216757	1.31075	1.12251	0.868194	0.505311	0.726571	0.779595	polyprotein [Ananas comosus]	0	GO:0043231//intracellular membrane0bounded organelle	GO:0004175//endopeptidase activity;GO:0003676//nucleic acid binding;GO:0034061	GO:0006260//DNA replication;GO:0019538//protein metabolic process
Unigene0001234	1307	0.934577	1.02662	1.2315	1.16864	1.38724	2.34048	0.785054	0.477596	0.352973	0.0807452	0.253203	0.213938	0.600648	0.461628	0.0803346	0.52991	0.191232	0.135786	0	0	0	0	0
Unigene0001235	1870	0	0	0	0.596041	0.0969583	0.408958	0.129105	0	0.0616758	0.0752471	1.16506	0.0747637	0.0645863	0.0645292	0	0	0.267316	0.980686	PREDICTED: WAT10related protein At5g474700like isoform X2 [Cicer arietinum]	0	0	0	0
Unigene0001236	1805	0	0	0	0	0.050225	0.0706142	0	0	0	0.0389784	0.0916721	0	0	0	0	0	0	0.0983227	PREDICTED: WAT10related protein At5g474700like isoform X2 [Cicer arietinum]	0	0	0	GO:0044763;GO:0016043//cellular component organization
Unigene0001237	326	0.133818	0	0.149617	0	0	0.977443	1.66629	0	0.353785	0	0	0	0.55572	0.370152	0.322077	0.499886	0.095836	0.0907324	0	0	0	0	0
Unigene0001238	316	0	0	0	0	0.573772	1.81507	1.91002	0	0	0	0	0	0	0	0	0	0	0	0	0	0	0	0
Unigene0001239	353	0.741496	0.434411	0	0.467777	0.385224	0	1.02589	0	0	0	0	0	0.513214	0.17092	0	0	0	0	PREDICTED: double0strand break repair protein MRE11A0like [Cicer arietinum]	0	0	0	0
Unigene0001240	661	0.131996	0.173994	0.590318	0.686981	0.685749	0.964134	0.273934	0.515102	0.290806	0.478974	0.166887	0.21151	0.639512	0.273834	0.370641	0.49308	0.283593	0.402737	0	0	0	0	0
Unigene0001241	521	0.753594	0.147166	1.0298	2.53551	0.43501	0.366963	0.57924	0.653518	0.14758	1.28288	2.38198	0.536692	1.04317	1.15806	0	0.469183	0.359799	1.81674	0	0	0	0	0
Unigene0001242	641	0.884744	0.119616	0.760921	0.45081	0.424287	0.795373	0	0.531174	0.059976	0	0.0430234	0	0	0.188252	0	0.508464	0.0487403	0.276868	0	0	0	0	0
Unigene0001243	287	0.760012	0.133578	0.339896	0.143837	0	0	0.84121	0.197725	0.267907	0	0.0960907	0.243568	0.210412	0.210226	0	0.283907	0	0	0	0	0	0	0
Unigene0001244	245	0	0.156477	0.398163	0	0.370025	0.26012	0	0.231621	0.313834	0	0.112563	0	0.492965	0	0	0	0	0.12073	0	0	0	0	0
Unigene0001245	278	0.47077	0.413706	0.350899	0.74247	0	0.916968	0.217111	0	0.13829	0	0	0	0	0	0.251792	0	0.224766	0.106398	0	0	0	0	0
Unigene0001246	296	0	0.259032	0	1.9525	0.612541	1.07651	4.28207	0.958566	0.259761	0.475378	5.21747	0.472325	1.4281	6.72652	0	0.137638	0.316647	3.39756	hypothetical protein MTR_6g026820 [Medicago truncatula]	0	0	0	0
Unigene0001247	671	1.30029	1.08554	0.79959	1.35349	0.472871	0.854789	1.25931	0	0.171884	0.0524262	0.0821998	0.312537	0	0	0.260798	0.425015	0.0931223	0.176326	0	0	0	0	0
Unigene0001248	208	0	0.368623	0.468991	0.198468	0.435846	0.612782	0	0.272823	0	0.33825	0	0	0.580656	0	0	0	0.600818	0	0	0	0	0	0
Unigene0001249	298	0.731958	0	0.327349	0.69264	0.304215	0.213857	0	0	0.774053	0.472188	0.185087	0	0.40529	0.404932	0	0.136714	0.524204	0.297773	0	0	0	0	0
Unigene0001250	524	0.499519	0.365809	0.837739	0.315125	1.12455	0.851345	0.806293	0.433184	0.807043	0.671336	0.842077	1.20064	2.0744	0.460571	0.0667922	0.699745	0.178869	0.620928	0	0	0	0	0
Unigene0001251	245	0.53418	0.782383	0.796327	0.33699	0.740049	0.780359	0.246354	0.463242	0.156917	0.143584	0.787944	0	0	0	0	0	0	0	0	0	0	0	0
Unigene0001252	208	0	0	0	0.396936	0	0	1.16071	0	0	0	0.132587	0.672155	0	0	0	0.195869	0	0	0	0	0	0	0
Unigene0001253	360	0	0.319473	0.541945	0.344011	0.377734	0.708103	0.502973	0.157631	0	0.0977167	0.459634	0	0.503235	0	0.194439	0.226337	0.0867848	0.24649	0	0	0	0	0
Unigene0001254	284	0.153608	0.809932	0	0.290714	0.957634	0.673197	0.425048	0.599441	0.81221	1.61026	0.67974	0.738424	0.850538	0.849786	0.369709	0.860719	0.99008	0.312452	0	0	0	0	0
Unigene0001255	214	0.407707	0	0.455841	0.57871	0.211813	0.595601	0	0	0	0	0	0	0.564376	0.281938	0	0	0.145993	0	0	0	0	0	0
Unigene0001256	288	0	0.133114	0.508073	0.430014	0.944334	0.221282	0.419144	0.394077	0	0.244292	0	0	0.838725	0.209496	0.243049	0	0	0	0	0	0	0	0
Unigene0001257	257	0	0	0.759144	0.803139	0	0	0	0	0	0	0.214615	0	0	0	0	0	0.121566	0	U1 small nuclear ribonucleoprotein 70 kDa [Medicago truncatula]	0	0	0	0
Unigene0001258	398	0.657659	0	0.735302	0.829775	0.569448	0.800619	0.909901	0	0	0	0	0.175638	0	0.151595	0.0879374	0	0	0	0	0	0	0	0
Unigene0001259	204	1.06923	0.187925	0.239093	0.607078	0.666589	0.624797	0.8876	0	0.188454	0.172441	0.135186	1.71334	1.18408	0.887277	0.514692	0.399419	0.15315	0.144994	0	0	0	0	0
Unigene0001260	425	0	0.180408	0	2.03978	0	0	0	0	0	0	1.94668	0	0	0	0	0.0958605	0.294047	2.3663	0	0	0	0	0
Unigene0001261	328	0	0	1.04093	0.881004	0	0	0	0	0	0	0.168159	0	0.18411	0	0	0	0.0952516	0	PREDICTED: 10acyl0sn0glycerol030phosphate acyltransferase 30like [Cicer arietinum]	ko00564//Glycerophospholipid metabolism;ko00561//Glycerolipid metabolism	GO:0009536//plastid	GO:0016411//acylglycerol O0acyltransferase activity	GO:0046471//phosphatidylglycerol metabolic process
Unigene0001262	246	0	0.155841	0.594817	0.671241	0.368521	1.03625	0.490706	0	0.625116	1.001	0	0	0	0	0	0.331225	0	0	0	0	0	0	0
Unigene0001263	244	0.17879	0	0	0	0.185771	0.783557	0.247364	0	0	0	0	0	0	0	0	0	0	0.242449	0	0	0	0	0
Unigene0001264	248	0.351812	0	1.37671	0.998742	0.365549	0	0	3.43228	1.7052	3.68802	3.22485	2.53684	0.974003	2.18957	0.282251	0.164277	0.755868	0	PREDICTED: phospholipase D beta 10like isoform X2 [Cicer arietinum]	ko04144//Endocytosis;ko04666//Fc gamma R0mediated phagocytosis;ko00564//Glycerophospholipid metabolism;ko04724//Glutamatergic synapse;ko04912//GnRH signaling pathway;ko00565//Ether lipid metabolism	GO:0043231//intracellular membrane0bounded organelle;GO:0005911//cell0cell junction	GO:1901981;GO:0004620//phospholipase activity	GO:0006629//lipid metabolic process;GO:0010038//response to metal ion;GO:0042742//defense response to bacterium
Unigene0001265	535	0	0.143315	0.547009	0.308645	1.10143	5.00305	0.225633	0	0	0	0	0	0	0	0.523351	0.304603	0.291986	0.331724	0	0	0	0	0
Unigene0001266	2059	0.127124	0.279287	0.473774	3.00738	0.154102	0.0619031	0.0586273	0.468529	0.354758	1.0251	1.62066	0.135802	0.0586578	0.234424	0.152983	0.5936	0.637293	0.646452	p0hydroxybenzoic acid efflux pump subunit aaeB [Medicago truncatula]	0	GO:0016020//membrane	0	GO:0051234//establishment of localization
Unigene0001267	265	1.31697	0.434001	1.65651	1.40201	0.342098	0	0	0	0	0	0	0	0	0	0.792432	0.922431	1.65055	1.2278	0	0	0	0	0
Unigene0001268	504	0.173114	0.76065	0.580655	0.655259	0.179873	1.51736	0.239511	1.46372	1.06791	1.74494	5.52655	2.49657	4.79271	4.66876	2.08328	1.94003	2.04564	5.92749	0	0	0	0	0
Unigene0001269	212	1.64622	0.542502	0.690212	0.58417	0.213811	0.90183	1.42351	0.267675	0.181343	0.663736	0.26017	0	0.28485	0	0.82545	0.192173	0.589482	0	0	0	0	0	0
Unigene0001270	469	0.186033	0.735674	0.935981	0.616139	0.676538	0.951183	0.643463	1.33096	0.983657	0.600051	1.17604	0.298098	0.515038	0.900519	0.2985	0.955539	0.333076	0.81988	0	0	0	0	0
Unigene0001271	300	0	0	0.812917	0.412813	0	0.424862	0.402379	0	0	0	0	0.233014	0.402588	0	0	0.407407	0	0.0985959	0	0	0	0	0
Unigene0001272	257	1.01848	1.34253	1.3285	0.481883	0.705495	0.743922	0.704554	0.441612	0.74795	1.23191	0	0	0.469947	0.704297	0.272366	0.634097	0.121566	0	0	0	0	0	0
Unigene0001273	1200	0.945202	0.798683	1.05679	0.963231	0.5666	0.318646	1.8107	0	0	0.17589	0.0919268	1.45634	0.603882	1.10614	0.466655	0.135802	0.104142	0.024649	0	0	0	0	0
Unigene0001274	394	0.332168	0	0.123794	0.314325	0.230091	0.646998	0	0.288056	0.292725	0.178569	0.209985	0.177422	0.306539	0	0.17766	0.310208	0.158592	0	0	0	0	0	0
Unigene0001275	270	0.484719	0.425964	0.361296	0.611575	0.335763	0.708103	1.11772	0	0.284775	0.260578	0	0.776712	0	0	0	0	0	0.109551	Cc0nbs0lrr resistance protein [Medicago truncatula]	0	0	0	0
Unigene0001276	2147	1.28009	1.26777	1.11317	2.13425	0.992276	0.80144	0.955813	0.925081	0.358124	1.42547	3.04424	1.00933	0.562536	0.814955	0.863974	0.74005	1.2369	2.06652	PREDICTED: probable receptor0like protein kinase At2g232000like [Cicer arietinum]	0	0	GO:0004672//protein kinase activity;GO:0032550	GO:0006796//phosphate0containing compound metabolic process;GO:0006464//protein modification process
Unigene0001277	306	0	0	5.57884	0.944344	0	0	0	0	0.125636	0.574804	0	0.228445	0	0	0	0.399419	2.2462	0	0	0	0	0	0
Unigene0001278	501	1.30613	1.07129	1.36297	0.576785	1.4476	2.03527	1.08425	0.906141	1.0743	1.3341	0.880735	0.976704	1.08482	1.08386	0.978018	1.21978	0.748324	1.06271	0	0	0	0	0
Unigene0001279	432	0.706882	1.59737	1.35486	1.33782	0.419704	2.0653	0.838289	1.31359	0.889922	1.14003	0	0.64726	0.419362	0.418992	0.729148	0.66015	0.289283	0.684694	0	0	0	0	0
Unigene0001280	475	0	0.161418	0.205368	0.955989	0.954274	1.34167	0.508268	0.597338	0.485616	0.222177	0.464472	0.294333	0.762798	0.508083	0	0.600389	0.657738	0.56044	0	0	0	0	0
Unigene0001281	280	0	0	0	0.147433	0	0.455209	0	0	0	0	0	0	0	0	0	0	0	0	0	0	0	0	0
Unigene0001282	352	0	0.326734	0.277131	0.586382	0.386318	0	0.514404	0	0	0	0.0783467	0	0	0	0.0994292	0.694444	0.266272	0.0840306	0	0	0	0	0
Unigene0001283	276	0	0.277803	0.883605	0	0.656928	0.230903	1.09342	0	0.69646	1.78439	0.499602	0.253276	0	0.218604	0.126808	0.590445	0.113198	0.643017	0	0	0	0	0
Unigene0001284	236	0	0.324888	0.413348	0.699683	0.384136	0	1.023	0.480908	0.162901	0.447178	0.58428	0	0.511764	0	0.296602	0.34526	0.264767	0.125334	0	0	0	0	0
Unigene0001285	420	0.727078	0.730224	0.812917	0.196578	0.431695	1.21389	0.718533	0.675561	0.366139	0.335029	0.262648	0.332877	0.862688	1.5802	0.499987	0.388007	0.148774	0.492979	0	0	0	0	0
Unigene0001286	249	0.875998	0.153963	0	0.497365	0.546121	0	0	0	0	0	0	0	0	0	0.281117	0.327235	0.250944	0.11879	0	0	0	0	0
Unigene0001287	949	1.1952	1.25231	0.513962	1.26149	0.382112	0.940158	0.318002	0.35878	0.405107	0.333616	0.494022	0.515626	1.39994	1.14439	0.811359	0.643952	0.197529	0.342852	0	0	0	0	0
Unigene0001288	379	0.920838	0.910372	1.28694	0.762452	0.358797	0.336302	0.477758	0.299457	0.304311	0.371272	0.0727652	0	0	0.636779	0.554075	0.644972	0.824341	0.390221	0	0	0	0	0
Unigene0001289	341	0	0.449698	1.57339	0.242119	1.32927	1.30823	0.530998	1.33131	0.789186	1.03161	1.21311	1.63998	1.59382	0.884675	0.410546	0.597371	0.824583	0.780671	0	0	0	0	0
Unigene0001290	452	0.0965148	0.254448	0.971184	0.0913304	0	0.563976	0.534131	0.125547	0.0850544	0.155655	0.0610133	0	0.133602	0.133484	0.154863	0.0901343	0.138241	0.261759	Pectinesterase [Medicago truncatula]	ko00500//Starch and sucrose metabolism;ko00040//Pentose and glucuronate interconversions	GO:0005618//cell wall	GO:0030234//enzyme regulator activity;GO:0052689	GO:0071555;GO:0000272//polysaccharide catabolic process;GO:0044092//negative regulation of molecular function
Unigene0001291	248	0.351812	0.463751	0	0.499371	0.365549	0.256973	0.486748	0.457638	0.155019	0.567387	0.222403	0	0.487002	0.243285	0.423376	0.328554	0.125978	0.357808	RING finger protein [Medicago truncatula]	0	GO:0016591//DNA0directed RNA polymerase II, holoenzyme;GO:0005739//mitochondrion	GO:0070011;GO:0046914//transition metal ion binding;GO:0032550;GO:0016874//ligase activity;GO:0003677//DNA binding;GO:0034061;GO:0016887//ATPase activity	GO:0051716//cellular response to stimulus;GO:0006366//transcription from RNA polymerase II promoter;GO:0016567//protein ubiquitination;GO:0016043//cellular component organization;GO:0050794//regulation of cellular process;GO:0006950//response to stress;GO:0019941//modification0dependent protein catabolic process;GO:0006260//DNA replication
Unigene0001292	228	0.191336	0	0.427851	0.181058	0.596421	0.559029	0.264723	0	0	0	0	0	0	0	0	0	0	0	0	0	0	0	0
Unigene0001293	555	0.314412	0.207226	0.527297	0.297523	0.735049	0	0.652506	0.408988	0.0692696	0.126768	0.0993803	0	0.43523	0.434845	0.378369	0.146813	0.225171	0.159885	0	0	0	0	0
Unigene0001294	246	0.354672	0.155841	0.991362	0.16781	0.18426	0	0.736058	0	0.312558	0.572	0	0.568326	0.490961	0.245263	0.142273	0	0.508009	0	0	0	0	0	0
Unigene0001295	556	0.47077	0.758462	0.964973	1.41069	0.489151	0.687726	1.19411	0.918568	0.760595	1.58174	1.88483	1.25727	1.19473	1.73625	1.25896	1.68532	1.40479	1.80877	0	0	0	0	0
Unigene0001296	407	0	0.376774	0	4.96999	0.222742	0.313166	0.593187	0	0	0.0864324	0.203278	0	0	0	0	0	0	2.18025	0	0	0	0	0
Unigene0001297	273	0.159797	0.280856	0	0	1.32829	1.40064	0.884349	0	0	0.257714	0.101018	0	0	0	0	0	0.228883	0.108347	0	0	0	0	0
Unigene0001298	218	0.200113	0.175857	0.223739	0.568092	0.62378	0.584672	0.553732	0	0	0.161367	0	0	0	0.55353	0.160546	0	0	0	0	0	0	0	0
Unigene0001299	1502	0.0580888	0	0	0.19239	2.11249	0.339437	3.65677	0.151124	0	0.0468415	0.183609	0.0930813	0.120616	2.08882	0	0.0542486	0.0416012	0.315087	PREDICTED: cytochrome P450 94A10like [Cicer arietinum]	0	0	0	0
Unigene0001300	217	0.402071	1.23667	0.674309	0.190237	1.04442	0	0.278142	1.04603	1.94881	0.810553	0.381263	0.322139	1.11315	0.556081	0	0	0	0	0	0	0	0	0
Unigene0001301	520	1.00672	0.368623	0.187596	0.238161	0.784524	0.612782	0.812495	0.982162	0.36966	0.2706	0.159104	0.403293	0.580656	0.812199	0	0	0	0	0	0	0	0	0
Unigene0001302	291	0	0	0.167612	0.14186	1.8692	1.095	0.414823	0	0	0	0	0	0	0.207336	0	0	0	0	0	0	0	0	0
Unigene0001303	348	2.25645	0.771142	0.280316	1.30487	1.17228	0.18313	0.173439	0.652266	0.220946	0.80869	0.475483	1.00437	0.347059	0.173376	0.603433	0.585355	0.538664	0.594975	0	0	0	0	0
Unigene0001304	2184	0.858911	1.05321	0.870982	0.793872	1.03773	1.19638	0.60799	0.727527	0.510482	0.451	0.366192	0.60814	0.912459	0.469639	0.849337	0.932709	0.686649	0.636539	0	0	0	0	0
Unigene0001305	1348	0.453076	0.483476	0.361832	0.857476	0.60527	0.520046	0.492526	0.841945	0.456316	0.391447	0.26596	0.259288	0.53758	0.805658	0.363492	0.3929	0.370831	0.416911	0	0	0	0	0
Unigene0001306	386	0	0.198636	0.631801	0.213893	0.704581	0.660407	0.469094	0.882079	0.597585	0	0.285783	0.362197	0.625784	0.468923	0.453356	0.105546	0.647514	0.229887	0	0	0	0	0
Unigene0001307	350	0.249284	0	0	0	0.647543	0.364167	0.172448	0	0	0	0	0.399452	0.172538	0	0	0	0	0	0	0	0	0	0
Unigene0001308	874	0.898449	0.964999	1.73001	1.46421	0.674215	0.802085	0.414349	0.129856	0.43987	0.120748	0.283984	0	0.138188	0.207099	0.240268	0.279685	0.10724	0.0676859	0	0	0	0	0
Unigene0001309	441	0.296767	1.73863	1.21661	1.68495	1.02785	1.3006	0.821181	0	0.087176	0	0.0625352	0.158513	0	0	0	0.0923826	0	0.067072	0	0	0	0	0
Unigene0001310	219	0.398399	0	0.222717	0.376998	0.413955	0.291001	0	0	0	0	0	0.638394	0.55149	0	0	0	0	0	0	0	0	0	0
Unigene0001311	314	0.555729	0	0.155334	0.394408	1.73228	1.21776	0	0	0	0.224064	0	0	0	0	0	0	0	0	0	0	0	0	0
Unigene0001312	355	0.614432	0.215982	0.137394	0.697713	0.510738	0.179519	0	0	0	0	0.155369	0	0	0	0	0	0	0	0	0	0	0	0
Unigene0001313	211	0	0	0	0	0	0.604069	1.43026	0	0	0	0.130702	0	0	0	0	0	0	0	0	0	0	0	0
Unigene0001314	1430	0.0915203	0.160854	0.443409	0.837174	1.36301	1.42611	2.49025	0.4762	0.295728	0.6642	0.636416	0.879912	2.06925	1.77207	0.0489498	0.45584	0.371415	0.74464	PREDICTED: uncharacterized LOC101207534 [Cucumis sativus]	0	0	0	0
Unigene0001315	253	0.344859	1.0607	1.15672	0.979004	0.716649	1.00758	0	0.897187	0.151955	0.139043	0.218008	0	0.954754	0	0.276673	0.644122	0.123488	0.116912	0	0	0	0	0
Unigene0001316	466	0	0.0822678	0.837339	1.9489	0	0	0	0	0	0	0	0	0	0	0.0751053	0.0874264	0	0.444316	0	0	0	0	0
Unigene0001317	265	0	0	0.55217	0	0.855246	0	0.455523	0	0	0.132747	0	0	0	0	0	0.153739	0.353689	0	0	0	0	0	0
Unigene0001318	243	0.718102	0.631058	0.20072	0.84941	0.559605	0.524521	0	0	0	0	0	0	0	0	0	0	0	0	0	0	0	0	0
Unigene0001319	260	0	0	0.375192	0.317549	0.523016	1.9609	0.464283	0	0	0	0.106069	0.537724	0.232262	0	0	0.31339	0	0	0	0	0	0	0
Unigene0001320	224	0.973766	0.684585	0.435491	0.184292	0.809429	0.569012	0.5389	0	0	0	0	0	0.53918	0	1.24997	0.181878	0.418427	0	0	0	0	0	0
Unigene0001321	397	1.09886	0.386265	1.10573	0.831866	1.25594	1.60527	0.152032	1.00058	0.774702	0.886096	0.625195	0.528243	1.21689	0.607907	0.264477	0.820972	0.23609	0.968574	0	0	0	0	0
Unigene0001322	560	0.233704	0.273834	0.783884	0.368583	0	0	0	0	0	0	0	0	0	0	0.124997	2.47354	1.1158	0.316915	0	0	0	0	0
Unigene0001323	464	0.376075	0	0.630711	0.53381	0	0	0	0.2446	0.911402	0.303259	0	0	0	0	0.150858	0	0.67333	0	0	0	0	0	0
Unigene0001324	355	0.245773	0.863928	0	2.32571	0.510738	1.07711	0	0.479553	0.216589	0.396372	4.35034	0.196913	0.340215	0	0	0	1.05609	2.99954	PREDICTED: uncharacterized protein LOC101488893 [Cicer arietinum]	0	0	0	0
Unigene0001325	293	0.446669	0.261685	0.499403	0	0.464109	0.217506	0	0	0.13121	0.360184	0	0.954322	0.618309	0.411842	0.358352	0.278094	0.10663	0.201903	0	0	0	0	0
Unigene0001326	219	0.597599	0.350108	0.668151	0.753997	0.206977	0	0	0	0	0	0	0	0	0	0	0	0	0	0	0	0	0	0
Unigene0001327	241	0.362031	0	0.202386	0.685167	0	0.528874	1.25222	0	0	0	0	0	0	0	0	0	0	0	gag/pol polyprotein [Pisum sativum]	0	0	GO:0004175//endopeptidase activity;GO:0003676//nucleic acid binding;GO:0016891//endoribonuclease activity, producing 5'0phosphomonoesters;GO:0034061	GO:0006260//DNA replication;GO:0019538//protein metabolic process
Unigene0001328	236	0.18485	0	0.620021	0.699683	0.576204	0	0.511498	0	0	0	0	0	0	0	0.148301	0.17263	0	0.501335	0	0	0	0	0
Unigene0001329	321	0.271805	0.119429	1.97531	0.771614	0.282418	0	0.376055	0	0.119765	0.657533	0.343651	0.21777	0	0	0.109031	0.253836	0.973288	0	PREDICTED: chromosome0associated kinesin KIF40like isoform X3 [Cicer arietinum]	0	GO:0005875//microtubule associated complex	GO:0015631//tubulin binding;GO:0003774//motor activity;GO:0032550	GO:0007017//microtubule0based process
Unigene0001330	261	0	0.440653	0.560632	0.79083	0.173671	0.976694	0.462504	0	0.589189	0.673908	0.105663	0	0.231372	0	0.134096	0.156095	0	0	0	0	0	0	0
Unigene0001331	272	0.32077	0.422832	0	0.455309	0.166647	0.702897	0.2219	0.208629	0	0.258662	0	0.771001	0.222015	0.221819	0	0.898692	0.229725	0.652473	0	0	0	0	0
Unigene0001332	868	0.653365	0.618335	1.91054	0.856064	1.04442	1.395	0.556284	0.588392	0.84153	0.810553	0.571895	1.36909	0.487002	0.973142	0.403215	0.469363	0.323943	1.02231	0	0	0	0	0
Unigene0001333	825	0.528784	0.278813	0.236485	0.600456	0.988975	1.4677	0.877917	0	0.139799	0.04264	0.0668558	0.0847322	0	0.0731331	0	0	0.0757395	0	0	0	0	0	0
Unigene0001334	274	0	0.559661	0.356022	1.20529	1.15802	1.16294	0	0.414212	0.701544	0.256774	0.201299	0.510249	0.881579	1.101	0.766403	0.297377	0.456095	0.323855	0	0	0	0	0
Unigene0001335	230	0.379345	0.500045	0.212065	0	0.197078	0.831252	0.524842	0	0.16715	0	0	0	0	0	0.15217	0.354267	0.135837	0	0	0	0	0	0
Unigene0001336	540	0.161573	0.141988	0.0903241	0.611575	1.51093	0.472069	1.11772	0	0	0	0	0	0	0	0	0	0	0	OSJNBb0062H02.9 [Oryza sativa Japonica Group]	0	0	0	0
Unigene0001337	818	1.43994	1.03106	0.477017	3.22983	0	0	0	0	0.0939966	1.54818	3.27026	0	0	0	0.256717	0	0.763876	2.82047	PREDICTED: gibberellin 20 oxidase 20like [Cicer arietinum]	0	0	GO:0046914//transition metal ion binding;GO:0016706//oxidoreductase activity, acting on paired donors, with incorporation or reduction of molecular oxygen, 20oxoglutarate as one donor, and incorporation of one atom each of oxygen into both donors	GO:0044710
Unigene0001338	244	0.536369	0.628472	0.79959	0.338372	0.743082	0.783557	0.742092	0	0.47268	0.432516	0	2.00545	0.742478	0.247274	0.286878	0.33394	0.128043	0.363673	0	0	0	0	0
Unigene0001339	502	0.608313	0.687313	0.194323	0.493402	0.722359	1.14256	1.20233	0.113042	0.0765829	0	0	0.139251	0	0	0	0	0.248945	0.294609	0	0	0	0	0
Unigene0001340	540	0.727078	0.283976	0	0.0764469	0.419704	0.590086	0	0.945785	0.854325	0.260578	0.204282	0	0.33549	0.335193	0.129626	0.226337	0.115713	0.0547755	0	0	0	0	0
Unigene0001341	220	0	0.697032	1.33023	0.375285	1.85433	2.60711	0.823047	0	0	0	0	0	0	0	0.159087	0	0.142012	0.134449	0	0	0	0	0
Unigene0001342	514	0.509238	0.372926	0.189786	0.481883	0.617308	1.73582	1.29168	0.662418	0.373975	0.136879	0.268269	1.088	0.822407	0.117383	0.272366	0.475573	0.182349	0.46037	0	0	0	0	0
Unigene0001343	604	0	0	0.807533	2.0504	0.300186	0.633072	3.89721	0	0.1273	0.174725	0.91318	0	0.0999805	6.49298	0	0.0674515	0.568987	0.587657	0	0	0	0	0
Unigene0001344	351	0	0.218443	0.555841	0.352832	0.387419	0.544695	0	0	0.219058	0	0.0785699	0.796628	0	0	0.299138	0.232141	0.0890101	0.16854	0	0	0	0	0
Unigene0001345	246	0.354672	1.09088	0.594817	0.503431	1.65834	0.777186	0.981411	0.922717	0.468837	0.572	0.784741	0	1.2274	0.73579	0.711364	0.993676	0.635011	0.360717	0	0	0	0	0
Unigene0001346	227	0.768717	0.844423	0.214868	0.363712	0.599049	1.12298	2.12711	0	0.16936	0.309938	0.242978	1.84769	0.798082	0	0.154181	0	0.137632	0.130303	0	0	0	0	0
Unigene0001347	294	0.148383	0	0.829507	0.421238	0.154177	0	0.41059	0.193017	0.130764	0	0	0	0	0	0.238089	0.138574	0.106267	0.100608	hypothetical protein [Arabidopsis thaliana]	0	0	0	0
Unigene0001348	416	0.209734	0.276467	0.820733	1.48851	0.326885	1.53195	0.580354	0.954879	2.21796	1.60669	2.05509	5.71332	6.67754	5.36632	0.168265	1.07728	0.826125	0.568822	Protein FAM91A1 [Medicago truncatula]	0	GO:0043231//intracellular membrane0bounded organelle	0	0
Unigene0001349	491	0.177697	0.156158	0.298014	0.168152	0.738542	0.51918	0.860484	0.462298	0	0.286583	0.224668	0.569483	1.2299	1.22881	0.213844	0.746775	0.509043	0.542177	polyprotein [Citrus sinensis]	0	0	GO:0043167//ion binding	0
Unigene0001350	1257	0	0.152493	0.776054	0.656823	0.324544	1.06469	1.58455	0.361159	0.122338	0.419785	0.50461	0.222447	0.62454	0.767985	0.306277	0.259289	0.422532	0.682406	0	0	0	0	0
Unigene0001351	218	0	0	0	0	0	0.292336	0	0	0	0	0	0	0	0	0	0	0	0	0	0	0	0	0
Unigene0001352	507	0.17209	0.831765	0.865829	1.22134	0.447022	2.01118	1.54761	0	0.758276	1.804	1.25107	1.2409	1.19109	3.2131	0.345159	1.12499	0.308112	0.525067	0	0	0	0	0
Unigene0001353	209	0.834922	0.550289	0.466747	0.197518	0.867522	0.914775	0	1.35759	0.919728	0	0.131952	0	0.288939	0	0	0	0	0	0	0	0	0	0
Unigene0001354	284	0.153608	0	0.171743	0.145357	0.638423	0.224399	0.425048	0	0	0	0	0	0	0	0	0.286906	0	0	0	0	0	0	0
Unigene0001355	684	0.255115	0.224192	0.142617	1.38811	0.596421	0.465857	1.5001	0.165927	0.168617	0.668588	1.97562	0.510995	0.794582	1.76418	0.30701	0.655187	0.685143	1.72975	PREDICTED: ras0related protein RABC2a0like [Cicer arietinum]	0	GO:0042579//microbody	GO:0032029;GO:0003824//catalytic activity;GO:0032550	GO:0035556//intracellular signal transduction;GO:0045184//establishment of protein localization
Unigene0001356	459	0	0	0	0	0.0987539	0	0	0	0	0	0	0	0	0	0	0	0	0	PREDICTED: ras0related protein RABC2a0like [Cicer arietinum]	0	GO:0042579//microbody	GO:0032029;GO:0003824//catalytic activity;GO:0032550	GO:0035556//intracellular signal transduction;GO:0045184//establishment of protein localization
Unigene0001357	202	1.07982	0.569358	1.2073	1.02182	0.448792	0.946475	0.896388	0.561853	0.57096	0.348297	0.409575	0.34606	1.79371	1.79212	0.519788	0.201687	0.154666	0.732148	0	0	0	0	0
Unigene0001358	216	1.2118	0.887426	0.22581	0.191117	0.629556	1.77026	0	0.262718	0.711937	0.651444	0.893732	0	0.279575	0.837983	1.4583	1.13169	0.289283	0.273877	0	0	0	0	0
Unigene0001359	300	0.436247	0.255579	0.325167	0	0	0	1.20714	0.378314	0.640744	0.23452	0	0	0	0	0.233327	0.407407	0.312425	0.0985959	U0box domain0containing protein [Medicago truncatula]	0	0	GO:0043169//cation binding;GO:0016791//phosphatase activity	0
Unigene0001360	219	0.597599	0.875269	0.668151	0.376998	0.413955	0.582003	0.551204	0.259119	0.526639	0.32126	0.125927	0.638394	0.275745	0	0.159813	0.372061	0.28532	0.270126	0	0	0	0	0
Unigene0001361	234	0	0.163832	0	0	0.387419	1.08939	0	0	0	0	0	0	0	0	0	0.174106	0	0	0	0	0	0	0
Unigene0001362	383	0.113903	0.200192	0.5094	0.215568	0.11835	0	0.472769	0	0.100378	0.0918486	0.144011	0.182517	0.315343	0	0.0913814	0.106373	0	0.154458	0	0	0	0	0
Unigene0001363	490	0	0.312953	0.298623	0.0842476	0.277519	0	1.6013	0	0	0.0717918	0	0.285323	0.123241	0.123132	0	0.0831443	0	0	PREDICTED: uncharacterized protein LOC101504796 [Cicer arietinum]	0	0	0	0
Unigene0001364	318	0.685923	0.843891	0.766903	1.6876	0	0.200407	0	1.4276	0.362685	1.32747	1.82119	0.439648	0	0	0.33018	0.768693	1.08072	0.93015	Trehalose060phosphate phosphatase [Medicago truncatula]	0	GO:0044424//intracellular part	GO:0019203//carbohydrate phosphatase activity	GO:0050896//response to stimulus;GO:0005991//trehalose metabolic process
Unigene0001365	326	0.401454	0.117597	0.299233	0	0.556172	1.56391	0	0.348142	0.353785	0.215816	0.845952	0.21443	0.926199	0	0.322077	0	0.383344	0	Auxin0induced protein 5NG4 [Medicago truncatula]	0	0	0	0
Unigene0001366	304	0.717512	1.00886	0.160444	0.271588	0.447316	0.419272	0.99271	0.186668	0.252925	0.115717	0.181434	0.229948	0.198645	0.19847	0.8059	0.268031	0	0.389194	0	0	0	0	0
Unigene0001367	380	0.459207	0	1.02684	0.21727	0.596421	0.503126	0.953002	0.149334	0.20234	0.370295	0.435443	0.919791	0.635665	0.635103	0.460514	0.107212	0	0.155678	0	0	0	0	0
Unigene0001368	328	0	0.233761	0.743522	0.251715	0.27639	0.777186	3.86431	0.519028	0.468837	0.32175	1.00895	0.213122	1.47288	1.65553	0.106705	1.3663	0.285755	1.08215	PREDICTED: dof zinc finger protein DOF3.50like [Glycine max]	0	0	0	0
Unigene0001369	273	0.159797	0	1.25064	0.756068	0.49811	0	0	0	0	0.644286	0	0.512118	0	0.442013	0.256404	0	0	0.108347	0	0	0	0	0
Unigene0001370	525	0.332379	0.146045	0.371619	0.314524	0.863391	0.485556	0.689792	0.10809	0.0732278	0.0670057	0.630355	0.266301	0.460101	0.34477	0.13333	0.388007	0.476077	0.507064	0	0	0	0	0
Unigene0001371	453	0	0	0	1.82258	0	0	0.532952	0	0	0	5.60084	0.154314	0	0.266379	0	0	0	5.68069	PREDICTED: pectate lyase0like [Cicer arietinum]	ko00040//Pentose and glucuronate interconversions	0	GO:0016829//lyase activity	0
Unigene0001372	1111	0.157065	0.448585	1.22925	0.817452	0.652789	0.458897	0.488939	0.306465	0.553658	0.348297	0.372341	0.56628	0.924032	0.651681	0.53554	0.696736	0.0562422	0.212988	0	0	0	0	0
Unigene0001373	1000	0.74162	0.920083	1.26815	1.27972	0.498608	1.01967	0.663925	0.851207	0.653558	1.05534	0.41367	0.559233	0.785047	0.362009	0.804979	1.05926	0.874791	0.561996	0	0	0	0	0
Unigene0001374	281	0.310496	0	0.694306	0	0	0.226795	0.214793	0.403894	0.684068	0.125189	0.196285	0.248769	0.429809	0	0.124552	0	0	0.210525	0	0	0	0	0
Unigene0001375	202	0	0.379572	0	0.204363	0.224396	0.315492	0.298796	0.280926	0.19032	0.522446	0.136525	0.34606	0	0.298687	0.173263	0.806747	0.463998	0	0	0	0	0	0
Unigene0001376	774	1.40907	0.69343	0.630168	1.0667	0.819887	2.05844	1.55961	1.09975	0.54637	0.545395	0.64135	1.53536	2.18459	1.55904	0.813932	0.947458	0.363285	0.458585	0	0	0	0	0
Unigene0001377	391	0.557861	0.392192	0.249489	0	0.115928	2.60785	0.154365	0.4354	0.294971	0.359877	0.423192	0.715131	0.926673	0.771545	1.34268	1.66714	1.75789	2.11817	OSIGBa0114M03.4 [Oryza sativa Indica Group]	0	0	GO:0003676//nucleic acid binding	GO:0006259//DNA metabolic process
Unigene0001378	577	0	0.132883	0.507193	1.28781	0.785581	0.662696	0.209209	0	0.0666284	0.853539	0.955911	0.242302	0	0.731965	0	0.0706078	0.270733	0.717682	0	0	0	0	0
Unigene0001379	328	0.133002	0.11688	0.148704	0.881004	0	1.94297	0	0.346019	0.703255	0.75075	0.168159	0	1.65699	0	1.06705	1.24209	0.57151	0	0	0	0	0	0
Unigene0001380	908	0.816762	0.253327	0.53717	0.22732	0.549128	1.26336	0.864139	0.374981	0.12702	0	0.0607446	0.0769869	0.465548	0	0.231272	0.179475	0.103224	0.0325757	0	0	0	0	0
Unigene0001381	260	0.503362	0.294898	0.375192	0.317549	0.523016	1.22556	0.464283	0.218258	0.295728	0.1353	0.424277	0.806586	0.232262	0	0.942283	0.470085	0.240327	0.113764	0	0	0	0	0
Unigene0001382	1306	0.30063	0.587087	0.59755	0.568962	1.63125	2.09828	0.970515	0.521413	0.470991	0.538714	0.549027	1.17756	0.832303	1.24735	0.241188	0.655096	0.645902	0.611506	0	0	0	0	0
Unigene0001383	236	0.18485	0.81222	0	0.349842	0.768272	0	0	0	0.488703	0.149059	0.701136	0.296204	0	0.511312	0	0	0	0	0	0	0	0	0
Unigene0001384	244	0	0.157118	0	0.507557	1.48616	1.56711	0	0	0	0.288344	0.339074	0	0	0	0.286878	0	0	0.121224	0	0	0	0	0
Unigene0001385	540	0.242359	0.851929	2.34843	0.458681	0.335763	0.354052	0.447087	0.420349	0.213581	0.5863	0.102141	0.64726	0.33549	0.335193	0	0.377229	0.289283	0.164326	0	0	0	0	0
Unigene0001386	1156	0.754753	0.530613	0.632894	1.21416	0.627378	0.826937	1.04424	0.147268	0.831415	0.273877	0.33399	1.08847	0.679106	0.678506	1.21104	1.02204	1.05403	1.02349	Pentatricopeptide repeat0containing protein [Medicago truncatula]	0	0	GO:0046914//transition metal ion binding;GO:0097159	0
Unigene0001387	1236	0.14118	0	1.30225	3.07272	0.990175	0.928096	0.439491	0.459119	0.342145	1.33767	3.88234	0.33934	0.781724	0.829848	0.113266	0.626273	0.909977	3.1589	Serine/threonine protein kinase OXI1 [Medicago truncatula]	0	0	GO:0004672//protein kinase activity;GO:0032550	GO:0006796//phosphate0containing compound metabolic process;GO:0006464//protein modification process
Unigene0001388	214	0	0	0.911682	0.192903	0.423626	0	0.564082	0.530347	0	0	0	0	0	0.281938	0.654189	0.190377	0.145993	0	0	0	0	0	0
Unigene0001389	271	0	0	1.07989	1.06631	0	0	0	0	0	0.259616	0	0	0	0	0	0	0	0.218293	0	0	0	0	0
Unigene0001390	548	0.159214	0.139915	0.267016	1.35596	0.413577	0.232589	0.44056	0	0	0.0641934	1.0065	0	0	0	0	0	0.171036	0.107952	PREDICTED: transcription factor bHLH1300like [Cicer arietinum]	0	0	0	0
Unigene0001391	234	0.18643	0.491497	0.20844	0	0.774838	0.544695	0	0	0	0.300667	0	0	0.258069	0	0	0	0	0	0	0	0	0	0
Unigene0001392	258	0.169088	0.148592	0.378101	0.160005	0.17569	0.494026	0	3.5192	1.19208	0.954442	0.534458	0.812838	0.936251	1.40313	2.30614	0.947458	0.847666	0.343939	0	0	0	0	0
Unigene0001393	214	0.815415	1.07486	0.911682	1.15742	0.847253	0.595601	0	0	0.538943	0.164383	0.128869	0.979964	1.12875	0.281938	0.327094	0.761509	0.437979	0	0	0	0	0	0
Unigene0001394	279	0	0	0.174821	0.295923	0.324932	0	0.432665	0	0	0.126086	0.197692	1.50331	1.08223	0	0	0.146024	0	0	0	0	0	0	0
Unigene0001395	517	0.590663	0.29661	0.188685	0.558935	1.0521	0.616337	0.116744	0.439049	0.446166	0	0.21337	1.2169	0	0.466807	0.338482	0.157604	0.181291	0	CCHC0type integrase [Populus trichocarpa]	0	0	GO:0097159	0
Unigene0001396	264	0.165245	0.29043	0	0.312737	1.71697	0.241399	0.457248	0.214951	0	0	0	0	0.686229	0	0.132572	0.308642	0	0	0	0	0	0	0
Unigene0001397	428	0.203854	0.179144	0.341881	0.482258	0.847253	0.2978	0	0.530347	0.628767	0.986299	0.644346	0.816637	2.3986	1.40969	0.245321	0	0.145993	0.276437	0	0	0	0	0
Unigene0001398	1033	0.464542	1.00203	2.12476	1.87824	0.96536	0.123387	0.934858	1.59309	2.53072	2.48596	2.80319	1.01506	0.935345	2.16107	0.609858	2.2086	2.722	1.80393	Kinase0like protein [Medicago truncatula]	0	0	GO:0036094;GO:0016301//kinase activity;GO:1901363;GO:0097159	GO:0006796//phosphate0containing compound metabolic process
Unigene0001399	353	0.247165	0.217206	0.829037	0.467777	0.385224	0.361072	0.854912	0	0.762358	0.797235	0.0781247	0.792114	0	0.854601	0	0.115413	0.265517	0.167585	0	0	0	0	0
Unigene0001400	260	0.167787	0.147449	0.187596	0.317549	0	1.22556	0	0	0	0	0.106069	0	0.232262	0	0.269224	0	0	0	0	0	0	0	0
Unigene0001401	556	0.235385	0	1.0527	1.18795	1.46745	1.71932	1.51978	0.714442	0.41487	1.20213	0.297605	0.251454	1.41195	0.434063	0.377688	0.586197	0.786683	0.319195	0	0	0	0	0
Unigene0001402	1796	1.04447	1.36612	0.678939	0.689554	1.64049	1.59678	1.04179	0.663524	0.706388	0.62678	0.783118	1.20659	1.2777	1.04141	0.56513	0.65784	0.574055	0.65877	0	0	0	0	0
Unigene0001403	455	0.383514	0.168513	0.107198	0.453641	0	1.12051	0.265305	0	0.506962	0.231943	0.363666	0	0.663607	0	0.384605	0.17908	0.411989	0.39005	PREDICTED: amino0acid permease BAT1 homolog isoform X3 [Cicer arietinum]	0	GO:0031224//intrinsic to membrane;GO:0043231//intracellular membrane0bounded organelle	GO:0008324//cation transmembrane transporter activity;GO:0005310//dicarboxylic acid transmembrane transporter activity;GO:0015179//L0amino acid transmembrane transporter activity	GO:0044763;GO:0006835//dicarboxylic acid transport;GO:0006812//cation transport;GO:0015807//L0amino acid transport
Unigene0001404	390	0.447433	0.196599	0.125064	0.10585	0	0.326817	0	0	0	0	0	0	0	0	0	0	0	0.151686	PREDICTED: amino0acid permease BAT1 homolog isoform X4 [Cicer arietinum]	0	GO:0031224//intrinsic to membrane;GO:0043231//intracellular membrane0bounded organelle	GO:0008324//cation transmembrane transporter activity;GO:0005310//dicarboxylic acid transmembrane transporter activity;GO:0015179//L0amino acid transmembrane transporter activity	GO:0044763;GO:0006835//dicarboxylic acid transport;GO:0006812//cation transport;GO:0015807//L0amino acid transport
Unigene0001405	852	0	0.0899925	0.0572477	0.193809	0	0	0	0	0	0	0.0323686	0	0	0	0	0.0956355	0	0	PREDICTED: pentatricopeptide repeat0containing protein At1g080700like [Cicer arietinum]	0	0	0	GO:0006396//RNA processing
Unigene0001406	983	0.53255	0.545997	0.297711	0.167981	0.0922239	0.129663	0.122801	0.115457	0	0.536796	0.28055	0.497791	0	0.122756	0.0712087	0.207226	0.127131	0.0300903	PREDICTED: pentatricopeptide repeat0containing protein At1g080700like [Cicer arietinum]	0	0	0	0
Unigene0001407	410	0.319205	0.187009	1.54652	0.604117	0.663337	1.2435	0.588847	1.10726	0.843906	0.2574	0.336317	0.852489	0.88373	0.588632	0.341455	0.39747	0.381007	0.288573	0	0	0	0	0
Unigene0001408	340	0.769848	0.563776	0.430368	0	0	0.187439	0.35504	0.333807	0	0.310394	0	0	0	0	0.205877	1.43791	0.827008	0.347985	PREDICTED: chromodomain0helicase0DNA0binding protein 10like [Glycine max]	ko00230//Purine metabolism	0	0	0
Unigene0001409	203	0.2149	0.944256	0.480542	0	0.223291	0.627875	1.78394	0	0.189382	1.03974	0	0	0.594958	0.891647	0.517228	0	0.153904	0.291416	0	0	0	0	0
Unigene0001410	430	0.405811	0.802398	0.340291	0.864028	0.632484	0.296415	0.982552	1.18773	0.357624	1.14533	1.60337	1.30054	0.280875	1.40313	0.325573	0.189492	0.871885	1.03182	PREDICTED: WAT10related protein At3g280500like isoform X2 [Cicer arietinum]	0	0	0	0
Unigene0001411	390	0.223716	0	0.250128	0	0.464903	0	0	0.291011	0	0.1804	0.424277	0	0	0.309409	0	0.208927	0.160218	0	PREDICTED: WAT10related protein At3g280500like isoform X3 [Cicer arietinum]	0	0	0	0
Unigene0001412	1184	0.294761	0.453307	0.782707	0.732186	0.612541	1.02268	0.917586	0.383426	0.259761	0.534801	0.675475	1.00369	0.86706	0.713418	0.17736	0.344094	0.395809	0.799426	Os03g0775700 [Oryza sativa Japonica Group]	0	0	0	0
Unigene0001413	540	0	0	0	0.229341	0	0	0	0	0	0	0.102141	0	0	0	0	0	0	0	hypothetical protein MTR_8g107730 [Medicago truncatula]	0	GO:0043231//intracellular membrane0bounded organelle	0	0
Unigene0001414	1628	0.45554	0.612258	0.928763	1.19178	1.25292	1.91814	1.18637	0.487997	0.9682	0.669851	0.152458	1.37404	1.29827	1.26006	0.709441	0.575575	0.403006	0.581401	0	0	0	0	0
Unigene0001415	230	1.51738	1.16677	0.636196	1.0769	0.197078	0.831252	0	0.246727	0.668602	1.52948	0.839331	0	0.262557	0.262325	2.89123	4.60547	4.89014	3.7295	0	0	0	0	0
Unigene0001416	445	0	0	0.219214	0	0.407443	0.859271	0.678166	0.255043	0.172785	0.0790517	0.247892	0	0.407111	0.542335	0.157299	0.0915522	0.280832	0.132938	0	0	0	0	0
Unigene0001417	486	0	0	0	0.169882	0.279803	0.393391	0.496764	0.233527	0.158208	0.434296	0.397214	0	0	0.993165	0.0720146	0.502972	0.25714	0.852063	0	0	0	0	0
Unigene0001418	337	0	0.113759	0	2.08244	0	0.756431	0	0.336778	0.228158	0	2.12768	0	0	0	0	0	0.0927078	1.22879	PREDICTED: F0box protein SKIP230like [Cicer arietinum]	0	0	0	0
Unigene0001419	277	0.787449	0.5536	0.528249	0.29806	1.47275	0.690209	0.871578	0.204863	0.277578	0	0.0995597	0.504723	0	0	0.758103	0.735392	0.789523	0.640695	0	0	0	0	0
Unigene0001420	921	0.2842	0.457877	0.635505	0.493045	1.47648	1.10713	0.98301	0.369688	0.125227	0.305564	0.119774	0.910803	0.852385	0.458571	0.228007	0.221177	0.576681	0.385391	0	0	0	0	0
Unigene0001421	353	0.247165	0.325808	0	0	0.513632	2.88858	1.88081	0	0.108908	0	0	0	0.855357	1.36736	0.0991476	0.461651	0.0885058	0	Ribosomal protein S4 [Medicago truncatula]	0	GO:0044391	GO:0003723//RNA binding;GO:0005198//structural molecule activity	GO:0010467//gene expression
Unigene0001422	232	0.188037	0	0.210237	0	0	0.54939	0.260159	0	0.16571	0	0	0.301311	0.520588	0.520128	0	0	0	0	Cysteine0rich RLK (RECEPTOR0like protein kinase) 8 [Theobroma cacao]	0	0	GO:0097159	GO:0006259//DNA metabolic process
Unigene0001423	397	0	0	0.122859	0.207966	0.456706	0.160527	0	0	0	0	0	0	0.304223	0	0.0881589	0.410486	0.786966	0.149011	0	0	0	0	0
Unigene0001424	326	0	0	0	0	0.556172	0	0	0	0	0	0	0	0.37048	0	0	0	0	0	0	0	0	0	0
Unigene0001425	1481	0	0	0	4.7107	0	0	0	0.0766335	0	0.0475057	7.56022	0	0	0	0	0	0.210956	10.9647	Fringe0related0like protein [Medicago truncatula]	0	0	0	0
Unigene0001426	202	0.431928	0	0	0.408726	0.224396	0	0	0	0	0	0	0	1.49476	0	0	0	0	0	gag0pro [Pisum sativum]	0	0	GO:0004175//endopeptidase activity	GO:0019538//protein metabolic process
Unigene0001427	912	0	0	2.72755	3.7117	0	0	0	0	0.168617	1.46575	0.876933	0	0.13243	0	0	0	0.616629	0.875687	Alpha alpha0trehalose0phosphate synthase [Medicago truncatula]	ko00500//Starch and sucrose metabolism	0	0	0
Unigene0001428	207	0	0	0	0.398853	0.437952	0.615742	0	0	0.185723	0.509826	1.59873	0	0	0	0	0.39363	0.30186	2.42917	PREDICTED: F0box/kelch0repeat protein At3g062400like [Cicer arietinum]	0	GO:0043231//intracellular membrane0bounded organelle	GO:0003676//nucleic acid binding	GO:0006351//transcription, DNA0dependent
Unigene0001429	411	0.743	0.652938	0	0.502206	0.110287	0.310118	0	0	0	0	0	0	0	0	0	0	0	0	0	0	0	0	0
Unigene0001430	393	0.444017	0.487745	1.73753	0.420166	1.96075	0	0.307159	0	0	0	0.0701731	0.355746	0.460979	0	0	0.103666	0.158995	0.225792	Histone deacetylase [Medicago truncatula]	0	0	0	GO:0044238//primary metabolic process;GO:0044260;GO:0051704;GO:0044699
Unigene0001431	333	0	0.575627	1.46472	2.60333	0.13612	0.574138	0.725006	0	0.346348	1.0564	1.98761	0.209922	0	0	0.210205	0.244689	0.562929	1.95415	PREDICTED: low affinity sulfate transporter 30like [Cicer arietinum]	0	GO:0031224//intrinsic to membrane	GO:0015291//secondary active transmembrane transporter activity;GO:0015103//inorganic anion transmembrane transporter activity	GO:0044763;GO:0015698//inorganic anion transport
Unigene0001432	1001	0.39223	0.268089	0.341084	1.031	0.905655	0.827653	2.29127	0.340143	0.153625	0.0702857	0.826514	0.48884	1.02557	1.74796	0.279713	0.2849	0.405747	0.531886	0	0	0	0	0
Unigene0001433	348	0	0	0.280316	0.237249	0.521012	0.54939	0.520317	0	0	0	0	0	0	0	0	0	0	0	gag0pro [Pisum sativum]	0	0	GO:0016772//transferase activity, transferring phosphorus0containing groups	GO:0008152//metabolic process
Unigene0001434	1542	0.877021	0.57182	0.94893	0.856681	2.08709	1.77715	0.62627	0.478413	0.324112	0.433451	0.733268	0.634668	1.37068	0.743425	0.453944	0.634097	0.324177	0.939922	Receptor0like kinase [Medicago truncatula]	0	0	GO:0016772//transferase activity, transferring phosphorus0containing groups;GO:0097159;GO:1901363	GO:0008152//metabolic process
Unigene0001435	581	0.150171	0.395905	0.419751	0.497365	0.936207	0.658134	0.623306	0	0.794037	0.181642	0.237332	0.360951	0.207877	0.103846	0.361436	0.210365	0.268869	0.20364	transport membrane protein [Citrullus lanatus]	0	GO:0043231//intracellular membrane0bounded organelle;GO:0031224//intrinsic to membrane	0	0
Unigene0001436	217	0	0	0.674309	0	0.83554	0.293683	0.556284	0	0.354328	0.162111	0.254175	1.28855	1.66972	0.556081	0.322572	0.187745	0.28795	0.408923	0	0	0	0	0
Unigene0001437	558	0.625444	0.549631	0.611873	0.443885	0.406165	0.456841	0.973497	0.508487	0.275589	0.756516	0.247115	0.626381	0.757558	0.756888	0.188167	0.36506	0.223961	0.530085	0	0	0	0	0
Unigene0001438	253	0.17243	0	0.192787	0.979004	0	0	0	0	0.30391	0	0	0	0	0	0.691682	0.483091	0	0.116912	PREDICTED: double0strand break repair protein MRE11A0like [Cicer arietinum]	0	0	GO:0005488//binding	0
Unigene0001439	353	1.85374	2.49786	1.65807	1.63722	0.64204	1.44429	0.170982	0.48227	0.435633	0.0996544	0.234374	0	0.855357	0.17092	0.39659	0.923302	0.354023	0.251378	0	0	0	0	0
Unigene0001440	696	0.438754	0.33049	0.280316	0.415186	1.30253	1.00722	0.867195	0	0.0552365	0.202172	0.198118	0.401748	0.347059	0.520128	0	0	0.0897774	0	0	0	0	0	0
Unigene0001441	299	0.291804	0.128217	0	0.552259	0.454796	0.639424	0	0	0	0	0	0	0	0	0	0	0	0	0	0	0	0	0
Unigene0001442	357	0.366594	0.966474	0.546499	0.462536	1.39666	2.85621	1.0144	0.794777	0.969192	0.197076	0.386247	1.56648	0.676618	1.35204	0.29411	0	0.437571	0.165707	0	0	0	0	0
Unigene0001443	299	0.583608	0.256433	0.326254	0	0.606395	2.13141	0.403724	0	0	0	0	0	0	0	0	0	0	0	0	0	0	0	0
Unigene0001444	553	0	0	0	0	0.163935	0	0.218289	0	0	0	0	0.252818	0.218402	0	0	0	0	0	gag/pol polyprotein [Pisum sativum]	0	0	GO:0004175//endopeptidase activity;GO:0003676//nucleic acid binding;GO:0016891//endoribonuclease activity, producing 5'0phosphomonoesters;GO:0034061	GO:0006260//DNA replication;GO:0019538//protein metabolic process
Unigene0001445	664	0.1314	0	0	0.0621707	0.409591	0.383911	0.181798	0	0.0578985	0	0	0.421109	0.181892	0.545194	0	0.122713	0	0	gag/pol polyprotein [Pisum sativum]	0	0	GO:0004175//endopeptidase activity;GO:0003676//nucleic acid binding;GO:0016891//endoribonuclease activity, producing 5'0phosphomonoesters;GO:0034061	GO:0006260//DNA replication;GO:0019538//protein metabolic process
Unigene0001446	365	0	0	0	1.0179	0	0	0	0	0	0	0	0	0	0	0	0	0	0	0	0	0	0	0
Unigene0001447	599	0.0728292	0.0640013	0.32571	0.137834	1.05942	0.638357	0.906863	0.189473	0.0641813	0.0587279	0.414361	0.116701	0.504075	0.100726	0.175288	0.136029	0	0.148141	0	0	0	0	0
Unigene0001448	512	0	0.374383	0.190527	0.161255	0.796782	0.99577	0.589422	0	0	0	0	0	0	0	0	0	0	0.057771	0	0	0	0	0
Unigene0001449	238	0.549891	1.93295	0.409874	0.867255	1.33318	0	0.2536	1.19217	0.80766	0.44342	0.115874	0	0	0	1.02938	2.05415	0.525085	0.248561	0	0	0	0	0
Unigene0001450	852	0.307216	0.314974	0.228991	0.387618	0.851231	1.12199	1.13346	0.666046	0.270737	0.495465	0.517897	1.23071	0.708782	1.06223	0.32863	0.286906	0.256687	0.173584	0	0	0	0	0
Unigene0001451	445	0.392132	0.5169	0.657641	0.278301	0.203721	0.859271	0.271266	0.382565	0	0.316207	0.185919	0	0	0.271168	0.629197	0.732417	0.0702079	0.398815	0	0	0	0	0
Unigene0001452	324	0	0	0.15054	1.52894	0	0	0	0	0	0	0	0	0	0	0	0	0	0.0912925	F0box protein SKIP19 [Medicago truncatula]	0	0	0	0
Unigene0001453	252	0	0	0	0.491444	0.179873	0.505788	0.239511	0	0.152558	0	0	0.277397	0	0	0.277771	0	0.123978	0	0	0	0	0	0
Unigene0001454	269	0	0	0.18132	1.07424	0	0	0	0	0	0.261546	0	0	0	0	0	0	0.69686	0.219916	pol [Pisum sativum]	0	0	GO:0046914//transition metal ion binding;GO:0003676//nucleic acid binding;GO:0034061	GO:0006260//DNA replication
Unigene0001455	521	0.669861	0.441498	0.280854	0.396174	0.522012	0.122321	0.231696	0.217839	0	0.675202	0.105866	0.268346	0.347725	0	0.20153	0.469183	0	0.454184	0	0	0	0	0
Unigene0001456	532	0	0	0.183365	0	0.255609	0	0.226905	0.213335	0.144529	0.264496	0.103677	0	0.567558	0.567056	0.131576	0	0.293633	0	IMP dehydrogenase/GMP reductase, related [Medicago truncatula]	0	0	0	0
Unigene0001457	586	0	0.261685	0	0.140892	0.464109	0	0.205996	1.16206	1.44331	1.80092	1.41184	3.10155	2.16408	2.16217	1.31396	0.41714	0.479834	1.61522	IMP dehydrogenase/GMP reductase, related [Medicago truncatula]	0	0	0	GO:0008152//metabolic process
Unigene0001458	674	0.2589	0.625675	0.723665	0.796227	0.874279	1.60742	0.1791	0.505167	0.399276	0	0.450087	0.829722	1.07516	0.71614	0.415419	0.423123	0.417185	0.0438854	0	0	0	0	0
Unigene0001459	271	0.160977	0	0.179982	0.304659	0	0.70549	0.445438	0.209399	0	0.259616	0	0	0	0.667913	0	0.150335	0	0.109147	0	0	0	0	0
Unigene0001460	286	0.610136	0.268089	0.170542	1.01038	0.633958	0	0	0.793666	0.672109	0.738	0.86784	0	1.68918	3.37537	3.54886	2.42165	2.73099	3.30951	NB0LRR type disease resistance protein Rps10k02 [Medicago truncatula]	0	0	0	0
Unigene0001461	225	0	0.170386	0.216778	0.366945	0.201458	0.283241	0.804757	0.504419	0.170865	0.156347	0	0.310685	0	0	0	0.18107	0	0.657306	PREDICTED: aspartic proteinase nepenthesin010like [Glycine max]	0	0	0	0
Unigene0001462	521	0.334931	0	0	0	0	0.122321	0.463392	0	0.29516	0.13504	0.105866	0.134173	0	0.231612	0.134354	0	0.239866	0	0	0	0	0	0
Unigene0001463	248	0.351812	0.463751	1.18004	0.166457	0.548323	1.79881	1.21687	0	0.930112	0.283694	0.222403	0.281871	0	0.486571	0.705627	0.328554	1.1338	0.119269	0	0	0	0	0
Unigene0001464	1277	0	0	1.37502	4.68739	0	0	0	0	0.0903162	5.61967	2.22438	0	0	0	0	0	0	0	0	0	0	0	0
Unigene0001465	521	0.167465	0	0.0936181	0.396174	0.174004	0.733927	0.695088	0	0	0.0675202	0	0	0	0	0.0671768	0	0.119933	0	PREDICTED: acylamino0acid0releasing enzyme0like [Fragaria vesca subsp. vesca]	0	0	GO:0005488//binding	GO:0043170;GO:0044238//primary metabolic process
Unigene0001466	215	0.608717	0.178311	0.226861	0.960031	0	0.592831	0	0	1.4305	0.490856	0.38481	0.650271	0	0	0.325573	0	0.290628	0.412727	mitochondrial ATPase F0 complex subunit 6 (mitochondrion) [Vicia faba]	ko00190//Oxidative phosphorylation;ko05016//Huntington's disease;ko05012//Parkinson's disease;ko05010//Alzheimer's disease	GO:0031224//intrinsic to membrane;GO:0043231//intracellular membrane0bounded organelle;GO:0033177//proton0transporting two0sector ATPase complex, proton0transporting domain;GO:0019866//organelle inner membrane	GO:0015077//monovalent inorganic cation transmembrane transporter activity	GO:0006818//hydrogen transport;GO:0006754//ATP biosynthetic process
Unigene0001467	640	0.545309	0.47921	0.685899	0.516017	0.42495	0.199154	1.03738	0.177335	0.300349	0.439725	0.129272	0.21845	0.754852	0.377093	0.218744	0.636574	0.0488165	0	0	0	0	0	0
Unigene0001468	422	0.310128	0.363382	1.04023	0.391292	1.07412	1.20814	0.429077	0.134472	0.728808	1.33376	0.588157	1.3252	0.8586	1.71568	0.829362	0.675794	0.592276	0.350459	0	0	0	0	0
Unigene0001469	262	0.166506	0.585294	1.11699	0.472687	0.346015	0.486483	0.460739	0.216592	0.29347	0.537069	0.10526	0.533619	0.691468	0.460571	0.133584	0.621996	0.238493	0	0	0	0	0	0
Unigene0001470	286	1.22027	0.134045	0.511626	0.577361	0.316979	0.22283	1.05519	0	0	0	0.192853	0.24442	0	0.843843	0.367123	0	0.546198	0.517111	0	0	0	0	0
Unigene0001471	300	0.581663	1.40568	0.9755	0.137604	0	0.849724	0	0	0	0	0	0	0	0	0	0	0	0	0	0	0	0	0
Unigene0001472	206	0	0	0	0.601184	0	0.618731	0	0	0	0	0	0	0	0	0	0.19777	0	0	0	0	0	0	0
Unigene0001473	217	0.402071	0.353334	0	0	0.208885	1.17473	0.278142	0	0	0	0	0	0.556573	0	0	0	0	0	0	0	0	0	0
Unigene0001474	532	0.328005	0.216185	0.641776	0.543175	0.170406	0.718751	1.02107	0.213335	0.0722643	0.198372	0.103677	0	0	0	0.0657878	0.153161	0.17618	0	0	0	0	0	0
Unigene0001475	268	0	0.429143	0	0.154035	0.338269	0	0.225212	0	0.14345	0	0	0.260836	0	0.67539	0	0.304035	0	0	0	0	0	0	0
Unigene0001476	340	0	0	0	0.242831	0	0	0	0	0	0.206929	0	0	0	0	0	0	0	0	PREDICTED: heat stress transcription factor C010like [Cicer arietinum]	0	GO:0043231//intracellular membrane0bounded organelle	GO:0001071//nucleic acid binding transcription factor activity;GO:0003677//DNA binding	GO:0009404//toxin metabolic process;GO:0006351//transcription, DNA0dependent;GO:0006950//response to stress
Unigene0001477	1172	1.67501	1.66824	0.332935	0.774905	1.19895	0.489389	0.411992	0.774705	0.721657	1.23063	2.07071	0.417516	0.721361	0.308881	1.55286	0.590949	0.959668	0.731898	PREDICTED: heat stress transcription factor C010like [Cicer arietinum]	0	GO:0043231//intracellular membrane0bounded organelle	GO:0001071//nucleic acid binding transcription factor activity;GO:0003677//DNA binding	GO:0009404//toxin metabolic process;GO:0006351//transcription, DNA0dependent;GO:0006950//response to stress
Unigene0001478	367	0.237737	0	0.531608	0.674899	0.247019	0.694597	0	0.154624	0.209507	0.67097	0.751445	0.190474	0.329091	0	0.190731	0.666061	0.170259	0	PREDICTED: uncharacterized mitochondrial protein AtMg008100like [Cicer arietinum]	0	0	0	0
Unigene0001479	1050	1.78654	1.02231	0.9755	0.589733	1.4246	1.76014	0.919722	1.35112	0.805506	0.804069	0.60409	1.73096	1.03523	1.55147	1.46663	0.853615	0.773625	0.647916	0	0	0	0	0
Unigene0001480	232	0	0.165245	0.210237	0.177937	0.195379	0.274695	0	0	0	0	0.118871	0	0	0	0	0	0	0.127495	0	0	0	0	0
Unigene0001481	369	0.354672	0.415575	0.264363	0.894988	0	0	0.654274	0	0.208372	0	0	0.378884	0.327307	0.327018	0	0	0.169336	0	0	0	0	0	0
Unigene0001482	446	0.586879	0.171914	0.546805	0.277677	0.609794	1.28602	0.947304	0.508943	1.20678	0.157749	0.309171	0.626943	0.1354	0.405839	0.70626	0.548081	0.420303	0.464241	0	0	0	0	0
Unigene0001483	307	0.8526	0.374627	0.953258	0.134467	0.442945	1.24552	0	0.554532	0.876587	0.802104	0.808476	0.455401	1.18023	1.17918	0.114004	1.19435	0.101767	0.385391	0	0	0	0	0
Unigene0001484	240	0.363539	0	0	0.516017	1.32207	0.796616	0	0	0	0	0.114908	0.291267	0	0.754185	0.291659	0.339506	0.650886	0.123245	LTRGag0pol0polymerase 3 [Arabidopsis lyrata subsp. lyrata]	0	0	0	0
Unigene0001485	394	0	0	0	0.62865	0.575229	3.07324	0	0	0	0	0	0.354843	1.83923	0.153134	0.355321	0	0	0	Ribulose bisphosphate carboxylase small chain 3A [Medicago truncatula]	0	0	0	0
Unigene0001486	1034	0.675044	0.370762	1.03777	0.958174	1.62199	2.03391	1.92628	0.49393	0.297444	0.476298	0.293383	0.60845	0.70083	0.466807	0.676965	1.14263	0.966887	0.543517	0	0	0	0	0
Unigene0001487	709	0.369179	0.270358	0.687941	0.407573	0.895053	1.16852	1.78772	0.320153	0.976027	0.645013	1.08912	1.18314	1.10726	1.02118	0.839188	0.574622	0.396591	0.166876	0	0	0	0	0
Unigene0001488	548	1.27371	1.25924	1.42409	1.20529	0.744438	0.930355	0.770981	1.03553	0.491081	0.706128	0.201299	0.255124	0.881579	0.2202	0.894137	0.594755	0.570119	0.215903	0	0	0	0	0
Unigene0001489	241	0.724061	0	0	0.856459	0.752332	0.793311	0.500886	0	0.478564	0	0.114432	0.290058	0.501147	0.250352	0.145224	0.169049	0	0.3682	0	0	0	0	0
Unigene0001490	653	0.40084	0.46967	1.34449	0.695398	0.208245	0.487973	0.55458	0.521413	0.412117	0.269357	0.29563	0.535253	0	0.184793	0.428779	0.31195	0.239223	0.27178	0	0	0	0	0
Unigene0001491	430	0	0.267466	1.81488	3.84012	0	0	0	0	0.0894061	1.14533	0.51308	0.812838	0.280875	1.12251	0.325573	0.568475	0.581256	0.550303	PREDICTED: EH domain0containing protein 10like [Cicer arietinum]	0	GO:0005911//cell0cell junction;GO:0016020//membrane;GO:0043231//intracellular membrane0bounded organelle	GO:0032550;GO:0017111//nucleoside0triphosphatase activity;GO:0046872//metal ion binding	GO:0006605//protein targeting;GO:0006972//hyperosmotic response;GO:0016192//vesicle0mediated transport;GO:0009154
Unigene0001492	380	0.574009	0.706204	0	0.43454	0.477137	0.335417	0.953002	0.746672	0	0.648016	0.653164	0.735833	0.635665	0.317552	0.184206	0.536062	0.493303	0	0	0	0	0	0
Unigene0001493	683	0.383233	0	0	0.483529	0.464562	0.186616	0	0	0	0.0515051	0	0	0.265248	0	0.102486	0	0.0914862	0	TIR0NBS0LRR type disease resistance protein [Medicago truncatula]	0	0	GO:0032550	GO:0050896//response to stimulus;GO:0009987//cellular process
Unigene0001494	397	0	0	0	0	0	0.160527	0	0	0	0.0886096	0	0	0	0	0	0	0	0.149011	Tir0nbs0lrr resistance protein [Medicago truncatula]	0	0	0	0
Unigene0001495	564	0.232046	0.67973	0.864805	0.731938	0.964426	0.451981	0.214031	0.301846	0.340821	0.311862	1.61361	0.37183	0.214143	0.855813	0.310276	0.216706	0.60934	0.786669	0	0	0	0	0
Unigene0001496	780	0	0	5.50282	0.317549	0	0	0	0.582022	1.13362	2.2099	0.141426	0	0	0	0	0.208927	1.64224	0.075843	0	0	0	0	0
Unigene0001497	529	1.15453	0.507292	0.922023	1.32662	0.942549	0.96377	0.798672	1.28727	0.508719	1.32998	0.677721	0.792863	0.228311	0.912436	0.198483	0.231044	0	0.279572	0	0	0	0	0
Unigene0001498	203	0	0	0	0	0.223291	0.627875	0.891972	0	0	0.519872	0	0	0.297479	0.297216	0.172409	0	0	0.145708	0	0	0	0	0
Unigene0001499	264	0.165245	0.145215	1.10852	0	0.171697	0.965595	0	0.214951	0.145624	0.2665	0.417849	0	0.228743	0.228541	0.530289	0.462963	0	0.560204	0	0	0	0	0
Unigene0001500	246	0	0	0	0.335621	0.552781	0.259062	0.736058	0.461359	0	0	0	0	0	0.245263	0	0.828063	0.127002	0.240478	0	0	0	0	0
Unigene0001501	278	0.47077	0.413706	0.701799	0	1.46745	1.14621	0.651332	1.02063	0.41487	1.01232	0.496008	1.00581	0.868895	1.30219	0	0.586197	0	0.106398	0	0	0	0	0
Unigene0001502	257	1.52771	0.596681	0.569358	0.160628	1.41099	0.495948	1.40911	0.662418	0.59836	0.958156	1.18038	1.36	1.40984	0.234766	0.272366	0	0	0.115092	0	0	0	0	0
Unigene0001503	216	0.807865	0.35497	0.677431	0.382235	0.629556	1.47522	1.95601	0.525436	0.533953	0.325722	1.40444	0.64726	0.279575	1.67597	0.324066	0.377229	0.867848	0.410816	0	0	0	0	0
Unigene0001504	840	0.311605	0.319473	1.10324	1.72006	0.971315	0.531077	0.790386	0.405336	0	0.711936	1.77287	0	0.143781	0	0.708315	0.388007	1.19019	1.05638	0	0	0	0	0
Unigene0001505	561	0.0777624	0.0683365	0.521658	0.294341	0.888785	0.567997	0	0.202307	0.342644	0.125412	0.0983174	0.747637	0.322932	0.537743	0	0.217865	0	0.31635	Receptor0like protein kinase HSL1 [Medicago truncatula]	0	GO:0016020//membrane	GO:1901363;GO:0016301//kinase activity;GO:0097159	GO:0009653//anatomical structure morphogenesis;GO:0048589//developmental growth;GO:0065008;GO:0050896//response to stimulus;GO:0048513//organ development;GO:0071554;GO:0016043//cellular component organization;GO:0016049//cell growth;GO:0008152//metabolic process
Unigene0001506	277	0	0	0.880415	0.74515	0	0	0	0	0	0	0	0	0	0	0	0	0	0	0	0	0	0	0
Unigene0001507	599	0	0.256005	0.0814274	0.0689171	0	0	0	0.0947364	0.0641813	0.176184	0.0460401	0	0	0	0	0.0680145	0.208631	0	PREDICTED: transcription factor MYB120like [Cicer arietinum]	0	0	0	0
Unigene0001508	584	0.448199	0.656452	0	0.0706872	0.310466	0.218251	0.930156	0.388679	0.197489	0.120473	0.141668	0	0	0.413252	0.11986	0	0.0534975	0.101297	PREDICTED: transcription factor MYB120like [Cicer arietinum]	0	0	0	0
Unigene0001509	268	0.325557	0	0.363993	0.462104	0	0.237796	0	0	0	0	0.102903	0.260836	0	0	0.130594	0.304035	0	0.110369	0	0	0	0	0
Unigene0001510	444	0	0	0	0.46488	0	0	0.135939	0	0.086587	0	0.124225	0	0.272019	0	0	0.183517	0.140732	0.266475	Transmembrane 9 superfamily protein member [Medicago truncatula]	0	GO:0031224//intrinsic to membrane;GO:0005618//cell wall;GO:0043231//intracellular membrane0bounded organelle	0	0
Unigene0001511	456	0	0	0	0	0	0	0.264723	0	0	0	0	0	0	0	0	0	0.137029	0	Transmembrane 9 superfamily protein member [Medicago truncatula]	0	GO:0031224//intrinsic to membrane;GO:0005618//cell wall;GO:0043231//intracellular membrane0bounded organelle	0	0
Unigene0001512	909	0.143976	0.0843494	0.107316	0.136242	0.0498658	0.280437	0.132798	0	0	0.0386997	0.0606777	0	0	0	0.0770057	0	0	0.0650798	PREDICTED: U0box domain0containing protein 50like [Cicer arietinum]	0	0	0	0
Unigene0001513	789	0	0.194356	0.247275	0.209284	0.1149	0.323089	0.152996	0	0.0974515	0.713369	0.699063	0	0.153075	0.15294	0	0.206544	0.395976	0.599823	PREDICTED: U0box domain0containing protein 50like [Cicer arietinum]	0	0	0	GO:0009987//cellular process
Unigene0001514	613	0.640493	0.125079	1.11395	0.87546	0.295778	1.55944	0.196923	0.185146	0.689871	1.09035	0.179955	0	0.295538	0.393702	0.799327	0.53169	0.101933	0.19301	0	0	0	0	0
Unigene0001515	364	0	0.105321	0.535989	0.793872	0.124528	0	0	0	0	0.869786	0.757638	0.384088	0	0	0	0	0	0	Helicase0like protein [Medicago truncatula]	0	0	GO:0004386//helicase activity;GO:0032550	GO:0032392//DNA geometric change
Unigene0001516	300	0	0.383368	0.812917	1.10084	0.151093	0.212431	1.40833	0	0.256297	0.35178	0.367707	0	0	1.2067	0	0.407407	0.208284	0.492979	0	0	0	0	0
Unigene0001517	540	0.403932	0.283976	0.45162	0.458681	1.67882	1.41621	1.22949	0.315262	0.355969	0.390867	0.459634	0.517808	0.89464	1.67597	0.259253	0.603566	0.462852	0.383428	0	0	0	0	0
Unigene0001518	323	0	0	0	0.766836	0.982341	0	0.186863	0	0.119024	0	0	0	0	0	0	0	0	0	0	0	0	0	0
Unigene0001519	555	0.550221	0.414452	0.966712	0.297523	1.22508	1.60759	0.652506	0.817976	0.831235	0.950757	0.745352	0.629767	0.652845	0.434845	0.756737	0.807474	1.91396	1.17249	0	0	0	0	0
Unigene0001520	207	0.632242	0	0.706884	0	0.218976	0	0	0.274141	0	0.339884	0	1.3508	0.29173	0.582945	1.01447	0	0	0	gag/pol polyprotein [Pisum sativum]	0	0	GO:0003676//nucleic acid binding;GO:0016787//hydrolase activity	GO:0006259//DNA metabolic process
Unigene0001521	208	0	0	0	0.198468	0.217923	1.22556	0.290177	0.272823	0.18483	0	0	0.336077	0.580656	0.870213	0	0.195869	0	0	0	0	0	0	0
Unigene0001522	267	0.816942	1.57942	0.548034	0	0.848839	1.19343	0.678166	0.212536	0.719937	0.131753	0.309865	0.523626	0.452346	0.677919	0.131083	0	0.234026	0	0	0	0	0	0
Unigene0001523	605	0.216321	0.0633666	0.322479	0.341168	0.749224	0.842701	0.29929	0	0	0.116291	0	0	0.19963	0.0997269	0.173549	0.26936	0.413124	0.391124	0	0	0	0	0
Unigene0001524	324	0	0.35497	0	1.27412	0.279803	0.393391	0.931432	0	0	0	0.170235	0.431507	0.55915	0.186219	0.108022	0	0.0964276	0.0912925	gag/pol polyprotein [Pisum sativum]	0	0	GO:0003676//nucleic acid binding;GO:0016787//hydrolase activity	GO:0006259//DNA metabolic process
Unigene0001525	590	0.295761	0.129955	0.496017	1.04953	0.768272	0.972142	1.2276	0.769452	0.260641	0.596237	0.420682	1.18482	1.12588	0.818099	0.177961	0.138104	0.264767	0.250667	0	0	0	0	0
Unigene0001526	528	0	0.0726075	0.831392	0.234553	1.20188	1.08629	1.94331	0.537378	0.582494	0.466375	0.313387	1.05915	0.686229	0.571352	0.132572	0.385802	0.4142	0.448163	0	0	0	0	0
Unigene0001527	354	0.123234	0	0	0.233228	0.128045	0.540079	1.023	0	0	0.198746	0	0	0	0.170437	0.39547	0.230174	0	0	0	0	0	0	0
Unigene0001528	562	0.232872	0	0.781095	0.146909	0	0.680384	0.214793	0.201947	0.0684068	0.0625943	0.0981425	0.248769	0	0.322072	0.062276	0.217477	0	0.0526312	Gag0Pol polyprotein [Medicago truncatula]	0	0	GO:0046914//transition metal ion binding;GO:0008289//lipid binding;GO:0032550	GO:0006259//DNA metabolic process;GO:0006950//response to stress;GO:0007154//cell communication
Unigene0001529	525	0.166189	0	0.650334	0.393155	0.690713	0.242778	0	0	0.292911	0	0	0.532603	0.23005	0	0.13333	0	0.119019	0.0563405	0	0	0	0	0
Unigene0001530	411	0.424571	0.466384	1.06807	0.401765	0.330861	0.775296	0.293707	0.138071	0.280618	0.599139	0.469699	0.340166	0.14693	0.734	0.851559	0.793007	0.304064	0.431807	0	0	0	0	0
Unigene0001531	229	0.190501	0	0.212991	0	0.197939	1.11318	0.527134	0	0.335761	0	0.120428	0.305258	0.527408	0	0	0	0	0	0	0	0	0	0
Unigene0001532	214	0	0	0.227921	0.57871	0	0	0	0	0	0.164383	0	0	0	0	0	0	0.437979	0.138219	putative gag/pol polyprotein [Phaseolus vulgaris]	0	0	0	0
Unigene0001533	601	0.0725869	0	0.568095	0.824253	0.527947	0.318116	0.200855	0	0	0	0	0	0	0	0	0	0	0	gag/pol polyprotein [Pisum sativum]	0	0	GO:0004175//endopeptidase activity;GO:0003676//nucleic acid binding;GO:0016891//endoribonuclease activity, producing 5'0phosphomonoesters;GO:0034061	GO:0006260//DNA replication;GO:0019538//protein metabolic process
Unigene0001534	220	0.396588	0.174258	0	0.375285	1.03018	1.15871	0.823047	0	0	0.6396	0.250709	0.635492	0	0.548498	0	0.555555	0	0.403347	0	0	0	0	0
Unigene0001535	424	0	0	0	2.72613	0	0	0	0	0	0	0.455298	0	0	0	0	0	0	0.488329	OO_Ba0005L100OO_Ba0081K17.19 [Oryza officinalis]	0	0	0	0
Unigene0001536	698	0.499997	0.43939	0.559026	0.827992	2.20796	0.913027	3.45884	0.0812996	0.385548	0.554381	0.829711	0.300447	0.346064	2.59319	0.200568	0.52531	0.581881	0.339012	0	0	0	0	0
Unigene0001537	309	0	0	0	0	1.02685	1.64995	0	0	0	0.227689	0	0.452454	0.781724	0	0	0	0	0	0	0	0	0	0
Unigene0001538	789	0.387038	0.583069	0.370913	0.837137	0.40215	0.72695	0.458987	0.50346	0	0.891711	0.139813	0.708787	0.306151	0.91764	0.133076	0.258179	0.197988	0.149956	0	0	0	0	0
Unigene0001539	436	0.800453	0.791356	0.447477	0.378728	0.62378	1.60785	0.415299	0.260308	1.05811	0.806835	0.253009	1.92397	0.83103	0.830295	0.642185	0.93442	1.0032	0.814094	0	0	0	0	0
Unigene0001540	279	0.469083	0.824447	0	0.739809	0.324932	0.22842	0.432665	1.62716	0.826766	1.51303	0.593076	0.751657	0.649335	1.51378	0.878113	0.438072	0.335941	0.318051	gag0pol polyprotein [Phaseolus vulgaris]	0	0	GO:0003676//nucleic acid binding;GO:0003824//catalytic activity	GO:0006259//DNA metabolic process
Unigene0001541	267	0	0.574334	0.182678	0	0.848839	0	0	0	0.431962	0	0.103288	0.785439	0.226173	0.451946	0.131083	0.152587	0.117013	0.221564	0	0	0	0	0
Unigene0001542	418	0.417461	0.642004	0.816806	0.790073	0.10844	2.59186	0.433183	1.22183	1.0117	0.252474	0.329881	0.836173	0.866816	0.86605	0.33492	0.974658	0.298972	0.28305	0	0	0	0	0
Unigene0001543	375	0	0	0.130067	0.330251	1.08787	0.169945	0.160951	0	0	0	0	0	0	0	0	0	0	0.157753	PREDICTED: protein LURP0one0related 40like [Cicer arietinum]	0	0	0	0
Unigene0001544	201	0.434077	0.762921	0	0.20538	0.676538	0.951183	0.300283	0	0.191267	0	0	0	0	0	0.696499	0.40538	0.466306	0.147158	0	0	0	0	0
Unigene0001545	387	0.338176	0	0.378101	0.853361	0.117127	0	0.467882	0.146633	0	0.0908992	0	0.361261	0	0.311808	0.180874	0.105273	0.32292	0	Zinc knuckle family protein [Medicago truncatula]	0	0	0	0
Unigene0001546	214	0	0	1.36752	0.57871	0	1.1912	0	0	0.359295	0.657533	0.386608	0.326655	0.564376	0	0.327094	0.190377	0.583973	0.552874	0	0	0	0	0
Unigene0001547	473	1.29122	1.45891	1.64989	0.610929	1.14997	1.07787	0.638021	1.19973	1.30045	0.818093	1.04948	1.18231	1.53205	1.14802	1.03591	0.516796	0.594467	0.687878	0	0	0	0	0
Unigene0001548	1126	0.232458	0.306422	0.303219	0.0366619	0.201279	0.226392	0.214411	0.100794	0.0682853	0	0.0979681	0.248327	0.107261	0.267917	0	0.0723636	0.166479	0.157613	Pentatricopeptide repeat0containing protein [Medicago truncatula]	0	GO:0044444//cytoplasmic part;GO:0043229//intracellular organelle;GO:0030529//ribonucleoprotein complex	0	0
Unigene0001549	1010	0	0	0	0.0408726	0.0897585	0.0630983	0	0	0	0	0	0	0	0	0	0	0	0	Pentatricopeptide repeat0containing protein [Medicago truncatula]	0	GO:0044444//cytoplasmic part;GO:0043229//intracellular organelle;GO:0030529//ribonucleoprotein complex	0	0
Unigene0001550	310	0	0	0.472016	0.665828	0	0	0.389399	0	0	0.226955	0.177923	0	0	0	0	0	0.201565	0	0	0	0	0	0
Unigene0001551	312	0.559291	0.245749	0.31266	0	0.726411	0.204261	0.386902	0	0.24644	0	0.0883911	0	0	0.193381	0	0	0	0	0	0	0	0	0
Unigene0001552	273	1.59797	0.140428	0.714652	0.604855	0.830184	0.700322	0.663261	0.207865	1.12658	0.515429	1.61629	1.28029	0.221202	0.442013	0.256404	0	0.457766	0.325041	0	0	0	0	0
Unigene0001553	842	0	0	0.23171	0.0980554	0	0	0	0	0.0913174	0	0	0	0	0	0	0	0	0	PREDICTED: uncharacterized LOC101216856 [Cucumis sativus]	0	0	0	0
Unigene0001554	926	0.188444	0.331203	0.105346	0.178321	0.195801	0	0.13036	0.551538	0.332135	0.151957	0.178691	0.0754904	0.391284	0	0.37796	0.879929	0.472349	0.159713	PREDICTED: uncharacterized LOC101216856 [Cucumis sativus]	0	0	0	0
Unigene0001555	283	0	0	0	0	0.320339	0	0.42655	0	0	0	0	0	0	0	0	0	0	0	0	0	0	0	0
Unigene0001556	423	0.61879	0.543784	0	0.487959	0.535792	0.602641	1.56956	0	0	0	0	0	0	0	0.744661	0.577882	0.590875	0.629335	0	0	0	0	0
Unigene0001557	228	0	0.168144	0	0.543175	0	0.559029	0.264723	0	0	0	0.241913	0	0	0	0	0	0	0	0	0	0	0	0
Unigene0001558	357	0	1.28863	0.546499	0.115634	0.253939	1.60662	0.338133	1.4306	0.646128	0.788303	0.695244	0.19581	0.676618	1.01403	0.88233	0.684718	0.175028	0.248561	0	0	0	0	0
Unigene0001559	408	0.96231	1.12755	0.597733	0.809438	1.44428	1.40579	0.739667	2.22538	0.848043	0.775985	0.878712	0.685334	0.888062	0.443638	0.343128	0.0998547	0.459449	0.144994	0	0	0	0	0
Unigene0001560	710	1.04454	0.809932	1.37394	0.63957	0.574581	1.52591	1.02011	0.239777	0.324884	0.495465	0.388423	0.590739	0.595377	1.01974	0.345061	0.286906	0.704057	0.458262	0	0	0	0	0
Unigene0001561	267	0.163388	0.717917	1.09607	0.618447	0.848839	0.477373	0.226055	0.637608	0.287975	0.131753	0	0.523626	0	0.451946	0.393248	0	0.117013	0.221564	0	0	0	0	0
Unigene0001562	807	0.810868	1.04512	0.483519	0.562695	0.561686	0.789706	0	0	0	0	0	0	0	0	0.780649	0.504842	0.813003	0.329875	0	0	0	0	0
Unigene0001563	202	0.431928	0.379572	0.482921	0.204363	0.224396	0.315492	0	0	0	0	0	0	0	0	0	0	0	0	0	0	0	0	0
Unigene0001564	217	0	0	0.22477	0.760946	0.208885	0.587367	0.834426	0	0.354328	0	0	1.61069	1.11315	0.556081	0.645144	0	0.431924	0.136308	Integrase, catalytic region; Zinc finger, CCHC0type; Peptidase aspartic, catalytic [Medicago truncatula]	0	0	GO:0046914//transition metal ion binding;GO:0097159;GO:0034061	GO:0006259//DNA metabolic process
Unigene0001565	277	1.10243	0.4152	0.880415	0.29806	0.981834	1.84056	0.435789	0.204863	0.832735	0.507986	0.199119	0	0.654024	0.43563	1.38986	0	0.225578	0.533913	0	0	0	0	0
Unigene0001566	229	0	0	0	0.360536	0.395878	0.278294	0	0	0	0	0	0	0.263704	0	0.152834	0	0	0	0	0	0	0	0
Unigene0001567	270	0	0.425964	0	0.917363	0.503645	0.708103	0.447087	0.210174	0.142387	0.130289	0.817127	0.258904	0.22366	0.446924	0	0	0	0.109551	0	0	0	0	0
Unigene0001568	220	0	0.174258	0.221705	0.375285	0.206036	0	0.274349	0	0	0.3198	0.376064	0.317746	0.548984	0.548498	0.159087	0.185185	0	0.134449	0	0	0	0	0
Unigene0001569	236	0	0	0.206674	0	0	0.540079	0.255749	0	0	0	0	0	0	0	0	0	0	0	NBS0containing resistance0like protein, partial [Medicago truncatula]	0	0	GO:0003676//nucleic acid binding;GO:0016891//endoribonuclease activity, producing 5'0phosphomonoesters;GO:0034061;GO:0032550	GO:0006260//DNA replication;GO:0006950//response to stress
Unigene0001570	1020	0.0855386	0.0751702	1.05201	4.1686	0.533271	0.499838	0.414213	0.556344	0.45229	1.62095	5.02893	0.137067	0.473633	0.236607	0.274503	0.758896	1.16394	4.08883	PREDICTED: E3 ubiquitin0protein ligase RNF80like isoform X1 [Cicer arietinum]	0	0	GO:0003824//catalytic activity;GO:0046914//transition metal ion binding	0
Unigene0001571	230	0.75869	0.500045	0.212065	0.358968	0.394157	1.6625	0	0	0	0	0	0	0	0	0	0	0	0	0	0	0	0	0
Unigene0001572	348	0.250717	0.220326	0.981107	0.830372	0.260506	0.36626	0.693756	0	0	0.101086	0	0.200874	0	0.520128	0.201144	0.117071	0.0897774	0.0849964	TMV resistance protein N [Medicago truncatula]	0	0	GO:0043167//ion binding;GO:0097159	GO:0044260;GO:0090304
Unigene0001573	284	0	0.269977	0.343486	0.145357	0.478817	0.897596	0.637572	0.399628	0	0.371599	0.194211	0	0.425269	0.212446	0.369709	0.717266	0.440036	0.520753	0	0	0	0	0
Unigene0001574	1723	0.911485	0.51175	1.27387	1.55733	1.026	0.99866	1.54132	0.592831	0.758628	1.04125	0.38414	1.46056	1.36688	1.54076	0.650012	0.236452	0.34452	0.463509	0	0	0	0	0
Unigene0001575	267	0	0	0	0	0.679072	1.43212	0.452111	0	0	0	0	0	0	0.225973	0	0	0.117013	0	0	0	0	0	0
Unigene0001576	427	0.91949	0.53869	0.342682	0.870098	0.424618	0.298498	0.565403	0.797383	0.63024	0.247152	0.258342	0.818549	0.424273	0.282599	0.655721	0.763292	0.146335	0.692711	0	0	0	0	0
Unigene0001577	237	0.736282	0.323517	0.411603	0.870914	0	0.8067	0	0	0	0	0	0	0	0	0.443026	0.515705	0.131825	0.374415	0	0	0	0	0
Unigene0001578	306	0.427693	0	0.159395	0.269813	0.296262	0.624797	0.591733	0	0	0.229922	0.270373	0	0	0	0.686257	0.13314	0	0	0	0	0	0	0
Unigene0001579	441	0.593533	0.782383	1.43781	1.40413	0.308354	0.289022	0.41059	0.900748	1.04611	1.75491	1.0631	0.317025	0.684673	0.273627	0	0	0.212534	0.067072	0	0	0	0	0
Unigene0001580	210	0	0	1.39357	0	0	0	0.574827	0	0	0.502543	0.131324	0	0	0	0	0	0.297548	0.140851	Phosphoribosylaminoimidazole0succinocarboxamide synthase [Medicago truncatula]	ko00230//Purine metabolism	0	0	0
Unigene0001581	338	0.774403	1.81476	0.577219	1.70988	0.536426	0.942741	0.535711	0.503673	1.13741	1.04077	1.30547	0.827267	0	0.714021	0	0	0	0	0	0	0	0	0
Unigene0001582	202	0	0.759144	0.24146	0.204363	0.673188	0.315492	0	0	0.38064	0	0	0.34606	1.19581	0	0.173263	0	0	0	0	0	0	0	0
Unigene0001583	465	0.469083	0.494668	0.83914	0	0.194959	0.411157	0	0.488147	0.578736	0.226955	0.177923	1.20265	0.649335	0.129752	0.150534	0.0876144	0.0671882	0.0636102	0	0	0	0	0
Unigene0001584	1700	0.97514	0.766736	1.46325	0.534229	1.19986	0.712269	1.52667	0.133523	0.045229	0.413859	0.194668	0.945761	0.674927	0.390402	0.247052	0.239651	0.110268	0.0347985	0	0	0	0	0
Unigene0001585	1021	0.598184	0.413031	0.477718	0.404322	0.62154	1.24837	0.945846	0.666959	0.338885	0.344545	0.189076	0.342332	1.18292	1.12278	0.239955	0.598541	0.1836	0.202793	0	0	0	0	0
Unigene0001586	587	0	0	0	3.16467	0	0.217136	0	0	0	0	0	0	0	0	0	0.13881	0.372569	7.20573	ATP0dependent DNA helicase PIF1 [Medicago truncatula]	0	0	0	GO:0009987//cellular process
Unigene0001587	509	0.51424	0.527225	0.383301	0.811028	0.979584	1.50246	0.118579	0.111487	0.0755297	0.207336	0.433446	0	0.593204	0.237072	0.137521	0.480244	0.613802	0.290558	0	0	0	0	0
Unigene0001588	470	0	0	0	2.54715	0	0	0.128419	0	0	0.374234	1.7603	0	0	0	0	0.0866824	0.19942	2.58027	hypothetical protein MTR_2g027700 [Medicago truncatula]	0	0	0	0
Unigene0001589	595	0	0	0	0.277522	0.304726	0.107108	0.5072	0	0	0	0	0	0	0	0	0.136944	0	0	PREDICTED: pleiotropic drug resistance protein 20like [Cicer arietinum]	0	0	0	0
Unigene0001590	773	0.338613	0.0495948	0	0.053404	0.351835	0.741997	1.40546	0	0	0	0.10703	0	0.234366	0.390264	0	0.0527047	0.0404173	0	PREDICTED: pleiotropic drug resistance protein 20like [Cicer arietinum]	0	0	GO:0017111//nucleoside0triphosphatase activity;GO:0032550	GO:0009154
Unigene0001591	253	0.344859	0	0.963933	0	0.716649	0.503789	0.238564	0	0	0	0	0	0	0	0	0	0	0	0	0	0	0	0
Unigene0001592	734	0.891513	0.835679	0.930314	0.843624	1.17334	0.260474	1.06899	0.463873	0.83803	0.287559	0.638728	0.476186	1.31636	0.822	0.810606	1.22111	0.212824	0.0805961	0	0	0	0	0
Unigene0001593	264	0.33049	0.58086	0.369508	0.469106	1.03018	1.68979	0.685873	0.214951	0.582494	0	0.208924	1.05915	0.914973	0.685623	0.132572	0.462963	0.118343	0.448163	0	0	0	0	0
Unigene0001594	305	0.143032	0.125694	0.159918	0.406046	0.891699	0.208948	0.395782	0.372112	0.126048	0	0	0	0	0	0.344253	0.267152	0	0.193959	0	0	0	0	0
Unigene0001595	958	1.04736	1.48065	0.814614	0.560185	1.65603	2.06222	1.51207	0.59235	1.2039	0.991447	0.575742	0.437813	0.756428	1.07066	0.84027	0.765483	1.0762	0.802764	0	0	0	0	0
Unigene0001596	223	0.195626	0	0.437444	0.370236	0.203265	0	0	0	0	0.315498	2.3497	0	0	0	0	0.182694	0.140101	0.397921	0	0	0	0	0
Unigene0001597	279	0.625444	0.274816	0.349642	0.147962	0.162466	0.685261	0.648998	0.610184	0.688972	0	0.098846	0.501105	0.216445	0.432508	0.627224	0.292048	0	0.212034	0	0	0	0	0
Unigene0001598	410	0.212803	0.65453	1.07067	2.01372	0	0.310875	1.76654	0.138408	0.187535	0.6006	1.34527	0	0	0	0	1.39115	1.75263	3.60717	0	0	0	0	0
Unigene0001599	264	0	0	0.554262	4.06559	0	0	0	0.214951	0	3.86425	4.07403	0	0	0	0	0	0.236686	1.00837	0	0	0	0	0
Unigene0001600	286	1.22027	0.402134	0.511626	0.14434	0	0	0	1.38892	0.940952	1.599	0.385707	1.71094	1.47803	1.68769	2.93699	2.13675	1.0924	2.27529	NB0LRR type disease resistance protein Rps10k02 [Medicago truncatula]	0	0	GO:0016876//ligase activity, forming aminoacyl0tRNA and related compounds;GO:0032550	GO:0006950//response to stress
Unigene0001601	306	0.285129	0.375851	0.318791	0.134906	0.592523	0.208266	0.986222	0	0.376908	0.344882	0.450621	0.456889	0	0.394345	0.114376	0.13314	0.510499	0.0966626	0	0	0	0	0
Unigene0001602	337	1.42395	1.36511	0.723665	1.10247	0.807027	3.21483	1.0746	2.02067	0.798553	0.7307	1.14567	1.03715	1.07516	1.43228	0.934694	1.93428	1.11249	0.877708	0	0	0	0	0
Unigene0001603	337	1.94175	1.70639	1.44733	0.734979	0	0	0	1.85228	3.08013	0.835086	0.40917	0	0	0	3.11565	2.05517	3.24477	0.438854	PLATZ transcription factor family protein [Theobroma cacao]	0	GO:0043231//intracellular membrane0bounded organelle	GO:0046914//transition metal ion binding	0
Unigene0001604	203	0.2149	0	0	0.203356	0.223291	0.313937	0.297324	0	0.189382	0	0	0	0	0	0	0.401386	0	0.145708	0	0	0	0	0
Unigene0001605	260	0.503362	0	0	0.476323	0	0.490225	0.232141	0.218258	0.147864	0.2706	0.212139	0.537724	0.929049	1.16028	0.807671	0.31339	0.120164	0.113764	ORF1 [Pisum sativum]	0	0	0	0
Unigene0001606	235	0	0	0.62266	0.175665	1.15731	2.16951	1.54102	0.241477	0	0	0	0	0.256971	0	0	0	0	0	0	0	0	0	0
Unigene0001607	271	0.643907	1.13171	0.179982	0.609318	1.3381	2.35163	1.11359	1.04699	0.851172	0.649041	1.32293	0.773846	0.445669	0.667913	0.387444	0.150335	0.576431	0.873174	0	0	0	0	0
Unigene0001608	1190	0.879826	0.83761	1.18863	0.936635	0.799906	1.17819	0.7608	1.09679	0.775353	0.561666	0.811119	1.17486	0.964181	0.912627	0.764686	0.855897	0.551339	0.621403	0	0	0	0	0
Unigene0001609	223	0	0	0.218722	0.370236	0.406529	0.285782	0.270658	0	0	0	0	0	0.270799	0	0	0	0	0.13264	Integrase, catalytic region; Ribonuclease H [Medicago truncatula]	0	0	GO:0004175//endopeptidase activity;GO:0003676//nucleic acid binding;GO:0016891//endoribonuclease activity, producing 5'0phosphomonoesters;GO:0034061	GO:0006260//DNA replication;GO:0019538//protein metabolic process
Unigene0001610	345	1.13804	1.00009	0.282754	0.837592	0.131386	0.554168	0	0	0.111434	0	0	0	0	0	0	0	0	0	0	0	0	0	0
Unigene0001611	686	0.699521	0.447076	0.995408	0.782299	0.79291	2.5083	1.49572	0.827217	1.12083	0.871758	0.361811	0.305703	1.32044	1.14337	0.816305	1.30655	1.22966	0.905472	0	0	0	0	0
Unigene0001612	750	0.232665	0.664504	0.9755	1.15588	1.08787	0.594807	1.04618	0.605302	0.102519	0.23452	0.404478	0.745644	0.32207	0.88491	0	0.325926	0.708164	0.197192	0	0	0	0	0
Unigene0001613	257	0.509238	0.14917	0	0.481883	0.529121	0.495948	0	1.10403	0	0.273759	0	0	0	0	0	0.475573	0.243133	0.345277	0	0	0	0	0
Unigene0001614	425	0.513232	0.180408	0.229529	0.38853	1.70647	4.34859	0.284032	0.53409	0.0904579	0.248315	0.584005	0.657921	1.56299	0	0	0	0.441071	0.0695971	0	0	0	0	0
Unigene0001615	681	0.448418	0.450359	1.50408	0.545568	0.66561	0.935819	0.709037	0	0	0	0	0	0	0	0.205575	0.0598248	0	0.217172	0	0	0	0	0
Unigene0001616	474	0.368141	0.889672	0.617405	0.261274	0.478144	0.8067	0	0.239439	0.567747	0.222646	0.465452	0.294954	0.254803	0.254577	0.295351	0.257853	0.329563	0.24961	0	0	0	0	0
Unigene0001617	218	0	0	0	0	0.207927	0.292336	0	0	0	0	0	0	0	0	0	0	0	0	0	0	0	0	0
Unigene0001618	262	0.166506	0.438971	0.186164	0	0.173008	0	0	0	0	0	0	0	0	0	0.133584	0	0	0	0	0	0	0	0
Unigene0001619	352	0	0.108911	0.277131	1.40732	0.257546	0	0	0	0	0	0.548427	0.794365	0.686229	0.342811	0	0	0	0.252092	0	0	0	0	0
Unigene0001620	2062	0.825103	1.22707	1.08809	3.08309	0.0879302	0.185439	0.351252	0.825613	0.484753	0.750646	4.36006	0.339011	0.527152	0.351124	0.831695	0.711283	0.515153	3.29928	ABC transporter B family member [Medicago truncatula]	0	GO:0031224//intrinsic to membrane	GO:0032550;GO:0042626//ATPase activity, coupled to transmembrane movement of substances	GO:0009154;GO:0044763;GO:0051234//establishment of localization
Unigene0001621	633	0.620256	0.484509	0.61643	0.586938	1.79021	1.20814	0.762803	0.448239	0.728808	0.389014	0.392105	0.993897	0.8586	1.2391	0.165872	0.386168	0.148069	0.373823	0	0	0	0	0
Unigene0001622	203	0.4298	0	0.240271	0	0	0.627875	0.297324	0	0	0.173291	0.271705	0.68871	0	0.594432	0.172409	0	0.461712	0.291416	0	0	0	0	0
Unigene0001623	265	0.164622	0.578668	0.920283	1.71356	0	0	0	0	0.580296	0.796483	0.936612	0	0.45576	0.683036	0.264144	0.461216	0.235793	0.223236	0	0	0	0	0
Unigene0001624	210	0	0	0.464524	0.196578	0	0.303473	0.287413	0.270224	0.366139	0	0.65662	0	0	0.287309	0.333325	0	0	0	0	0	0	0	0
Unigene0001625	445	0.098033	0.3446	0.548034	0.278301	0.203721	1.57533	0.271266	0.127522	0.259177	0.316207	0.185919	0	0.678519	0.135584	0	0.183104	0.0702079	0.265876	0	0	0	0	0
Unigene0001626	257	0.509238	0.745852	0.189786	0	1.05824	0	0	0	0.29918	0	0	0	0	0.234766	0.272366	0	0.121566	0.115092	0	0	0	0	0
Unigene0001627	1133	0.693067	0.541384	0.430494	0.47366	1.00018	0.787476	1.33179	0	0.20359	0.124194	0	0.493586	0	0.0532523	0.308906	0.287666	0.16545	0.339386	Tigger transposable element0derived protein [Medicago truncatula]	0	0	GO:0005488//binding	0
Unigene0001628	243	0	0.157765	0.40144	0.169882	0.932675	0.786781	1.49029	0.233527	0.158208	0	0.22698	0	0.248511	0.744874	0	0.167657	0	0.243447	0	0	0	0	0
Unigene0001629	1250	0.942294	1.19611	1.5608	1.321	1.05161	0.968685	1.06228	0.181591	0.399824	0.81613	0.72806	1.50993	1.25607	1.15843	0.951975	0.879999	0.549869	0.354945	polyprotein [Glycine max]	0	0	0	GO:0044260;GO:0090304
Unigene0001630	314	0.416796	0.73255	1.39801	0.525877	0	0.20296	0	0	0.122435	0.112032	0.351312	0	0.192319	0	0.334386	0.259495	0.298496	0.376799	PREDICTED: probable leucine0rich repeat receptor0like serine/threonine0protein kinase At3g148400like [Cicer arietinum]	0	0	GO:0004672//protein kinase activity;GO:0032550	GO:0006796//phosphate0containing compound metabolic process;GO:0006464//protein modification process
Unigene0001631	295	0.739402	0.389866	0.826695	0.279873	0	0	0.409199	0	0	0	0	0	0	0	0.118641	0	0	0	PREDICTED: F0box protein At2g261600like [Cicer arietinum]	0	0	0	0
Unigene0001632	246	0.354672	0.155841	0	0.503431	0.18426	1.81344	0	0.230679	0.156279	0.143	0	0.852489	0.490961	0	0	0	0	0	0	0	0	0	0
Unigene0001633	1233	0.247667	0.186554	0.39558	1.17181	1.06611	0.826982	2.15385	0.368189	0.654774	0.342365	0.559165	1.07719	1.37135	2.202	0	0.0660839	0.0506773	0.119946	PREDICTED: proline0rich receptor0like protein kinase PERK130like [Glycine max]	0	0	GO:0016740//transferase activity	0
Unigene0001634	665	1.44322	2.30597	1.10019	0.744926	0.817949	0.862502	0.816859	2.38935	2.25465	2.16887	0.787944	1.05119	1.54376	0.453645	2.2631	1.59287	1.03359	1.24542	0	0	0	0	0
Unigene0001635	681	0.448418	0.450359	0.787849	0.666806	0.332805	1.40373	0.177259	0.583304	0.620985	0.413251	0.283475	0.410597	0.62073	0.354389	0.154181	0.0598248	0.0917549	0.0868686	0	0	0	0	0
Unigene0001636	360	0.484719	0.319473	0.541945	0.229341	0	0.354052	0	0	0	0	0	0	0	0	0	0	0	0	0	0	0	0	0
Unigene0001637	280	0.311605	0	0.174196	0.147433	0	0	0	0	0	0	0	0	0	0	0	0	0	0	0	0	0	0	0
Unigene0001638	237	1.8407	1.45583	0.411603	0.348366	0	0	0	0.957757	0.973281	0.890582	0.698178	0.589908	0	0	1.1814	2.06282	2.37285	1.37285	Cytochrome P450 71B10 [Medicago truncatula]	0	0	GO:0046914//transition metal ion binding;GO:0016491//oxidoreductase activity;GO:0046906//tetrapyrrole binding	GO:0044710
Unigene0001639	250	0.697995	0.306694	0	0.330251	0	0	0	0.453977	0.153778	0.140712	0.110312	0	0	0	0.139996	0.651851	0.12497	0.23663	Cytochrome P450 71B10 [Medicago truncatula]	0	0	GO:0046914//transition metal ion binding;GO:0016491//oxidoreductase activity;GO:0046906//tetrapyrrole binding	GO:0044710
Unigene0001640	474	0.18407	0.161759	0.514504	1.39346	1.3388	1.21005	0.127335	1.43664	0.648854	0.816367	1.16363	0.147477	1.52882	0.763732	0.295351	1.11736	1.12051	1.49766	PREDICTED: uncharacterized transporter YBR287W0like isoform X1 [Cicer arietinum]	0	GO:0031224//intrinsic to membrane	0	GO:0044763
Unigene0001641	248	0.175906	0	0.983367	0	0.182774	0.513946	0	0	0.155019	0.283694	0	0.281871	0.243501	0	0.141125	0.657108	0.125978	0.477077	0	0	0	0	0
Unigene0001642	1068	0.490165	0.394855	1.14174	0.27057	1.10349	2.26752	0.339083	0.159402	0.251978	0.395258	0.0774664	0.589079	0.678519	0.451946	0.360477	0.343321	0.292533	0.249259	0	0	0	0	0
Unigene0001643	2675	0.0326166	0.085989	0.182336	0.123458	0.0677802	0.0476481	0	0.169711	0.172462	0.105205	0.134024	0.0522647	0.22575	0.0902203	0.10467	0.121841	0.245268	0.13269	hypothetical protein MTR_5g053880 [Medicago truncatula]	0	0	0	0
Unigene0001644	2570	0	0	0	0.0321255	0	0.0495948	0	0	0	0	0	0	0	0	0	0	0	0.0230185	hypothetical protein MTR_5g053880 [Medicago truncatula]	0	0	0	0
Unigene0001645	371	0.705521	0.310001	0.920283	0.890163	0	1.03066	1.46418	0.764786	0.621746	0.379278	0.966346	0.565262	0.325543	2.11416	0.188674	0.32944	0.421058	0.398636	0	0	0	0	0
Unigene0001646	244	0.35758	0	1.19939	0.845929	0	0	0	0	0.47268	0.144172	0	0	0	0	0.286878	0.16697	0	0	PREDICTED: uncharacterized protein LOC101266915 [Solanum lycopersicum]	0	0	0	0
Unigene0001647	224	0.194753	0	0	0	0.202357	0.853517	0.26945	0	0	0	0	0.312072	0.26959	0.538704	0.312492	0.363756	0.139476	0.132048	0	0	0	0	0
Unigene0001648	426	0.102405	0.269977	0.686972	0.872141	0.744827	0.299199	0.425048	0.266418	0	0.33031	0.517897	0.328188	0.567025	0.708155	0.410787	0.573813	0.440036	0.0694337	hypothetical protein VITISV_007140 [Vitis vinifera]	0	0	0	0
Unigene0001649	1068	0.694401	0.574334	0.502364	1.04363	0.848839	0.596716	1.75193	0.212536	0.503956	0.72464	0.413154	0.654533	0.508889	0.847399	0.360477	0.724788	0.585066	0.470823	Glutathione peroxidase [Medicago truncatula]	0	0	0	0
Unigene0001650	334	0.653064	0.229562	0.438099	0.494387	0.271425	0.190806	0.722836	0	0.115104	0.105323	0.247707	0	0	0	0.209575	0.121978	0	0.177118	Gag0Pol [Ipomoea batatas]	0	0	GO:0046914//transition metal ion binding;GO:0097159;GO:0008289//lipid binding	GO:0006259//DNA metabolic process
Unigene0001651	521	0.921059	0.662248	0.46809	0.15847	0.696016	0.366963	0.115848	0	0	0.13504	0.211732	0.670865	0.347725	0.231612	0.335884	0.156394	0.299832	0.113546	Histone deacetylase [Medicago truncatula]	0	0	0	GO:0044260;GO:0044699;GO:0044238//primary metabolic process
Unigene0001652	358	0	0.107086	0.136243	1.96029	0.633073	0.178015	0	0.158511	0.214774	0.589575	0.693302	0	0.168682	0	0.68434	3.75543	2.61809	3.05702	Heat shock protein [Medicago truncatula]	ko03040//Spliceosome;ko04141//Protein processing in endoplasmic reticulum;ko04144//Endocytosis;ko04010//MAPK signaling pathway;ko05145//Toxoplasmosis;ko04612//Antigen processing and presentation;ko05162//Measles	0	GO:0032550	GO:0050896//response to stimulus
Unigene0001653	618	0.635311	1.24067	1.26278	1.46956	1.61362	1.03122	1.56264	1.01006	0.497665	0.796913	0.847868	1.47047	1.56345	0.976291	1.13266	0.791082	1.2133	0.717931	0	0	0	0	0
Unigene0001654	687	0.127001	0.223213	0.780968	0.78116	0.263919	0.742117	0.351422	0.0826013	0.447681	0.460847	0.120428	0.610516	0.527408	0.702589	0.509448	0.177907	0.409291	0.129165	0	0	0	0	0
Unigene0001655	652	0	0	0.673275	0.443204	1.45995	0.977443	2.59201	0	0.235857	0.323724	0.465274	2.25151	2.7786	2.77614	0	0.124972	0.23959	0.36293	retroelement pol polyprotein0like [Arabidopsis thaliana]	0	0	GO:0005488//binding	0
Unigene0001656	286	0.152534	0.134045	0	0.433021	0	0	0.211038	0	0	0	0	0.48884	0	0	0.122374	0.2849	0	0.103422	Retrotransposon gag protein [Asparagus officinalis]	0	0	GO:0046914//transition metal ion binding;GO:0003676//nucleic acid binding;GO:0034061	GO:0006260//DNA replication
Unigene0001657	234	0.372861	0	0	0.352832	0.387419	0	0.51587	0	0	0	0	0	0.516138	0	0	0	0	0.126405	retroelement pol polyprotein0like [Arabidopsis thaliana]	0	0	0	0
Unigene0001658	397	0	0.482831	0.982872	0.623899	2.05517	3.85265	1.36829	0.28588	0.0968378	0.354438	0.625195	1.93689	1.97745	1.06384	0.264477	0.307864	0.23609	0.596046	0	0	0	0	0
Unigene0001659	271	0.48293	0.707321	0	0.609318	0	0.470327	0	0.837596	0.283724	0.129808	0.407056	0	0.222835	0.222638	0	0	0	0	0	0	0	0	0
Unigene0001660	326	1.33818	0.587987	0	1.01304	0.417129	0.390977	1.11086	0.174071	0.943426	0	0.592166	0	1.11144	1.29553	0	0	0	0	0	0	0	0	0
Unigene0001661	964	0.0905077	0	0.505965	0.128469	1.22254	1.05775	1.25222	0.117733	0	0	0	1.08772	1.75401	1.18917	0	0	0	0	0	0	0	0	0
Unigene0001662	752	2.20444	1.42743	0.713464	1.1528	0.602766	1.77967	0.882879	1.58469	0.511232	0.842027	0.843477	2.23098	0.642428	1.76511	0.744661	0.921	0.997102	0.275334	0	0	0	0	0
Unigene0001663	745	0.409897	0.102918	0.982047	2.10562	0.121686	0.598799	0.0810158	1.06639	0.567639	1.46378	4.29403	0.281493	0.162116	0.242959	0.422808	0.328113	0.796789	2.5807	PREDICTED: histone H2A variant 10like [Cicer arietinum]	ko05322//Systemic lupus erythematosus	GO:0043231//intracellular membrane0bounded organelle;GO:0000785//chromatin	GO:0003676//nucleic acid binding;GO:0046983//protein dimerization activity	GO:0034728//nucleosome organization
Unigene0001664	268	0	0.429143	1.27397	0.30807	0.676538	0.237796	0.450424	0	0	0	0	0	0	0.22513	0.652968	0.304035	0.116577	0	0	0	0	0	0
Unigene0001665	916	0.428627	0.125557	0.319487	1.26187	1.97939	1.11318	1.97675	0.61951	0.377731	0.806483	0.903211	1.75523	2.37334	1.8443	0.343878	0.578198	0.272861	0.807281	0	0	0	0	0
Unigene0001666	259	0.168435	0.148018	0	0.159387	0.700047	1.2303	0.466076	0	0	0	0	0	0	0	0	0	0	0	0	0	0	0	0
Unigene0001667	219	0.1992	0	0	0	0.620932	0	0.275602	0	0	0	0	1.27679	0.275745	0.275501	0	0	0	0	0	0	0	0	0
Unigene0001668	541	0.645097	0.425177	0.811414	0.152611	0.418928	2.82718	0.557826	1.25872	0.568497	0.715264	0.203904	0.516851	0.446493	0.334574	0.323467	0.451838	0.404247	0.710765	0	0	0	0	0
Unigene0001669	382	0.571004	0.903223	0.893783	1.62099	0.711959	0.166831	0	0.742763	1.20768	0.644623	0.866326	0.914975	0.948506	0.631778	0.641345	1.91972	0.736081	0.542019	0	0	0	0	0
Unigene0001670	751	1.0456	1.22514	1.03915	0.604653	1.62964	2.97007	1.60737	0.906745	0.665486	0.889989	1.43215	1.4893	1.5278	3.61527	0.605843	0.759481	0.582417	0.984646	0	0	0	0	0
Unigene0001671	260	0.335575	0.442348	0.375192	0.635097	0.174339	0.490225	0.464283	0.218258	0.295728	0	0.318208	0.268862	0.232262	0.232057	0	0.156695	0.360491	0.113764	0	0	0	0	0
Unigene0001672	420	1.03868	1.00406	1.04518	0.589733	0.863391	0.758682	1.00595	0.270224	0.18307	0.5863	1.44456	0.665753	0.862688	0.574617	0.249993	0.873015	1.26458	1.19724	0	0	0	0	0
Unigene0001673	208	0	0	2.57945	0.198468	0	0	0	0.272823	0	2.19863	0.132587	0	0	0	0	0	0.600818	0	0	0	0	0	0
Unigene0001674	236	0	0.324888	0.826695	0.349842	0.192068	0.270039	0.511498	0	0	0	0	0	0	0	0	0	0	0	0	0	0	0	0
Unigene0001675	314	0.416796	0.366275	0.466003	0.394408	0	0.811838	0.768876	0.54217	0	0	0	0.667874	0.769276	0.960745	0.111462	0.51899	0.198997	0.659399	0	0	0	0	0
Unigene0001676	275	0.951812	0.418219	0.709455	0.75057	0.329658	0	0.219479	0.412706	0.279597	0.25584	0.501419	0	0.439187	0.658198	0.509078	0.148148	0	0	0	0	0	0	0
Unigene0001677	633	0.344587	1.39296	0	0.0652154	2.86433	1.10746	2.47911	0.179296	0	1.11147	1.61199	0.110433	0	0	0.165872	0.128723	0.39485	2.0093	Os06g0700300 [Oryza sativa Japonica Group]	0	0	0	0
Unigene0001678	239	0.912651	0.481215	1.22448	0	0	1.0666	0.505078	0.237436	0.160856	0.735941	0.346168	1.16994	0.505341	1.26223	0.14644	0.340926	0	0.371282	0	0	0	0	0
Unigene0001679	221	0.197397	0.17347	0	0	0.205104	0.576736	0	0.770323	0.173958	0	0	0.316308	1.91275	1.09203	0	0	0.282738	0.803043	0	0	0	0	0
Unigene0001680	1046	0.375356	0.43981	0.932601	1.06558	0.520016	0.36556	2.4235	0.108503	0.477801	0.302679	0.975513	0.33415	0.46186	1.90349	0.13384	0.350542	0.298686	0.480726	Receptor kinase0like protein [Medicago truncatula]	0	0	GO:0016772//transferase activity, transferring phosphorus0containing groups	0
Unigene0001681	236	0.924252	0	1.03337	0.349842	0.576204	0.540079	0	0	0.162901	0.149059	0.116856	0	1.02353	0	0.148301	0.17263	0.661918	0.125334	0	0	0	0	0
Unigene0001682	217	0.804142	0.176667	0.449539	0.190237	0	0	0	0	0	0	0	0	0	0	0	0	0	0	0	0	0	0	0
Unigene0001683	323	0.135061	0.356069	0.604025	0.63903	0	0.591913	0.373726	0.175688	0.595118	0.435641	1.10995	0	0.18696	0.37359	0.108356	0	0	0.274725	0	0	0	0	0
Unigene0001684	268	0	0	0.727985	0.924209	0	0	0	0	0	0.393784	0.205806	0	0	0	0	0	0	0	copia0type polyprotein [Arabidopsis thaliana]	0	GO:0043231//intracellular membrane0bounded organelle	GO:0003676//nucleic acid binding	GO:0006259//DNA metabolic process
Unigene0001685	394	0.221445	0.194603	0.990356	0.4191	0	0.485248	0.30638	0.288056	0	0.0892843	0.41997	0.354843	0.306539	0.153134	0.266491	0.103403	0.317183	0.075073	0	0	0	0	0
Unigene0001686	779	0	0	0.81396	3.6565	0	0	0	0	0	3.16105	4.00041	0	0	0	0	0	0.802119	2.43009	Calcium0binding pollen allergen [Medicago truncatula]	ko04626//Plant0pathogen interaction	GO:0043231//intracellular membrane0bounded organelle	GO:0046872//metal ion binding	GO:0048588//developmental cell growth;GO:0003006//developmental process involved in reproduction;GO:0006950//response to stress
Unigene0001687	296	0	0.129516	0	0	0.612541	0.215302	1.42736	0	0	0	0	0	0.408028	0	0.11824	0	0	0	copia0type polyprotein [Glycine max]	0	0	GO:0005488//binding	0
Unigene0001688	376	0	0.611757	0.129721	0.439163	0.602766	0.508478	0.321047	0	0	0.280676	0.220037	0.743661	0.481821	0.64186	0	0.216706	0	0.0786669	F6N18.1 [Arabidopsis thaliana]	0	0	GO:0005488//binding	0
Unigene0001689	476	0.274946	1.04701	0.819748	0.520353	0.952269	1.33885	0.2536	0	0	0.0739034	0.057937	0.146857	0.253732	0.380261	0.0735275	0.0855897	0.131271	0	0	0	0	0	0
Unigene0001690	519	0.420276	0.369333	0.281936	0.715861	0.0873372	1.71909	0	0.437357	0.370372	0.338902	0.106274	0.26938	0.581775	0.348756	0.134871	0.313994	0.541778	0.284959	NADH dehydrogenase subunit 9, partial (mitochondrion) [Silene multinervia]	ko00190//Oxidative phosphorylation;ko05016//Huntington's disease;ko05012//Parkinson's disease;ko05010//Alzheimer's disease	GO:0043231//intracellular membrane0bounded organelle;GO:0044444//cytoplasmic part	GO:0016491//oxidoreductase activity	0
Unigene0001691	214	0	0	0	0.964517	0	0	0	0	0	0.164383	0.128869	0	0	0	0	0	0	0.138219	0	0	0	0	0
Unigene0001692	290	2.25645	0.660979	0.16819	0.711747	0.625214	0.659269	0.416254	0.782719	0	0.485214	0.190193	0.241049	0.832941	1.24831	0.120687	0.702426	0.215466	1.12195	0	0	0	0	0
Unigene0001693	391	0	0	0.748466	0	0.463714	0.325981	0	0	0	0.0899693	0	0	0	0	0	0	0	0	0	0	0	0	0
Unigene0001694	202	0	0	0	1.02182	0	0	0.597592	0	0	0	0.682624	0	0	0.298687	0	0	0	1.4643	Beta0galactosidase [Medicago truncatula]	0	0	GO:0015925;GO:0005488//binding	GO:0044238//primary metabolic process
Unigene0001695	507	0	0	0	3.33833	0.447022	0	0.833328	0	0	0.0693846	11.586	0.827267	0.357327	0.357011	0	0	0.677846	11.7848	PREDICTED: beta0galactosidase 130like [Cicer arietinum]	0	0	GO:0005488//binding;GO:0015925	GO:0009664//plant0type cell wall organization;GO:0000904//cell morphogenesis involved in differentiation;GO:0044238//primary metabolic process
Unigene0001696	576	0	0	0.254037	1.57672	2.51822	0.885129	1.57179	0	0	0.366438	3.68665	0.242723	0.209681	0.733235	0.121525	0.0707304	0.216962	0.102704	Ceramide glucosyltransferase [Medicago truncatula]	0	GO:0043231//intracellular membrane0bounded organelle	GO:0035251//UDP0glucosyltransferase activity	0
Unigene0001697	377	0.231431	0.508445	1.16439	0.766497	0	0.169043	0.800488	1.05366	0.305925	0.933104	0.512059	0.185422	0	0	0.371343	0.324197	0.165743	0.0784582	0	0	0	0	0
Unigene0001698	460	0.948363	0.250023	0.318098	0.987162	0	0.831252	0.656052	0	0	0.0764739	0.179857	0.151965	0	0.262325	0	0.354267	0	0.192905	0	0	0	0	0
Unigene0001699	419	1.45763	0.731967	1.28049	0.492617	1.51454	1.97728	0.288099	2.03152	1.3763	1.09144	1.38219	1.66836	1.153	3.31193	0.91883	1.84743	1.0439	0.988312	0	0	0	0	0
Unigene0001700	392	0.44515	1.76036	1.24426	1.89557	0.462531	0.650299	0.307943	1.01334	1.0788	2.15376	1.19599	0.713307	0.462155	0.307831	0.624984	0.935374	1.67371	0.301824	Transcription factor bHLH66 [Medicago truncatula]	0	0	0	0
Unigene0001701	650	1.47653	1.35653	1.57581	1.20668	1.1855	1.27459	1.20714	0.785729	0.650601	0.48708	0.339422	1.72072	0.18581	0.649759	1.23843	0.689458	0.672916	0.227529	0	0	0	0	0
Unigene0001702	651	0	0.117778	0	0.253649	1.11405	1.27263	1.85428	0	0	0	0.127088	0	0.185524	0	0	0	0	0.136308	0	0	0	0	0
Unigene0001703	361	0.725064	1.16816	0.540443	0.571764	1.0045	1.05921	0.835967	0.628777	0.21299	0.584676	0.381967	1.54912	1.6728	1.00279	0.678653	0.22571	0.519267	0	0	0	0	0	0
Unigene0001704	466	0.655307	1.39855	1.88401	0.531519	1.84814	0.273516	0.259042	0.730649	1.48498	0.226468	0.650984	0.900053	0.129588	0.647369	1.05147	0.611985	1.13975	0.634737	0	0	0	0	0
Unigene0001705	1811	5.22726	5.03819	5.76359	5.2428	3.75439	4.43395	2.13298	5.70291	5.17973	6.58495	3.94407	3.51257	4.30153	2.49868	6.31955	5.84903	4.95119	3.44623	OSJNBa0004N05.3 [Oryza sativa Japonica Group]	0	0	0	0
Unigene0001706	1469	2.91029	3.05337	0.664057	0.365321	0	0	0	3.16764	1.38704	0.454991	0.11264	0	0.0822167	0	1.02448	0.748808	0.212679	0.0805412	AT0hook DNA0binding protein [Medicago truncatula]	0	0	0	0
Unigene0001707	1347	0.194319	0.113843	0.0362101	0.0919406	0	0	0	0.210643	0.114164	0	0.0204737	0	0	0	0	0	0.0927766	0	AT0hook DNA0binding protein [Medicago truncatula]	0	0	0	0
Unigene0001708	228	0.382673	0	0.641776	0	0	0	0	0	0	0	0	0.306597	0	0	0	0	0	0	retrotransposon gag protein [Arachis hypogaea]	0	0	GO:0005488//binding	0
Unigene0001709	515	2.033	2.00989	0.189418	0	0	0	0	1.10189	1.11975	0.819682	0.642595	0	0	0	0.407756	0	0.24266	0.344607	Embryonic abundant0like protein [Medicago truncatula]	0	0	0	0
Unigene0001710	434	9.34815	8.39169	1.12385	0.760946	0	0	0	3.00734	3.01179	5.59282	2.79593	0	0.278287	0.278041	0.483858	1.22034	1.36776	3.20323	Embryonic abundant0like protein [Medicago truncatula]	0	0	0	0
Unigene0001711	929	3.42799	5.73607	5.98531	4.5325	6.68454	12.1422	4.09309	2.93204	3.64169	3.02932	2.10769	5.19202	6.43534	4.74106	3.6167	2.9821	2.45501	2.13324	0	0	0	0	0
Unigene0001712	523	0.834124	1.02622	0.4663	0.86825	1.38671	1.70595	0.69243	0.651018	0.294031	0.739881	0.527305	2.0049	0.46186	0.692177	0.13384	0	0.238949	0.169668	0	0	0	0	0
Unigene0001713	512	0.170409	0.449259	0.285791	0.32251	0.354125	0.373414	0.589422	0.221668	0.0750871	0.068707	0	0	0.117946	0.353524	0	0	0	0	0	0	0	0	0
Unigene0001714	431	0.202435	0	0.79217	0.191561	0	0	0	0	0	0	0	0.16219	0	0	0	0.189052	0.144977	0.205885	0	0	0	0	0
Unigene0001715	453	0	0.169257	0.538356	0	0	0.281366	0	0.501078	0.424333	0.465934	0.487029	0.308627	0	0.532758	0	0.539612	0.206904	0.195886	0	0	0	0	0
Unigene0001716	288	0	0	1.69358	6.02019	6.92511	6.41719	10.8978	0.591116	0	0.732875	6.41572	0.485445	0.209681	1.46647	0.243049	0.990226	4.44772	4.82709	NAC domain protein NAC4 [Glycine max]	0	0	GO:0003676//nucleic acid binding	GO:0006351//transcription, DNA0dependent
Unigene0001717	240	6.72547	6.38946	5.08073	4.64415	3.21074	2.92093	2.51487	6.38405	6.24725	6.4493	7.46905	4.36901	3.52264	3.77093	3.35408	5.60185	6.37868	4.92979	Diphthamide biosynthesis protein, partial [Medicago truncatula]	0	GO:0043231//intracellular membrane0bounded organelle	0	0
Unigene0001718	584	4.40729	5.71113	4.09242	3.3223	3.02704	6.54753	1.44691	6.02452	4.21311	3.43347	2.73891	3.11217	3.10213	2.27289	4.31496	3.69736	4.38679	2.83632	0	0	0	0	0
Unigene0001719	567	3.38534	4.66532	4.30115	4.51401	4.47684	8.3174	5.85471	6.10507	4.33943	3.41233	3.74516	4.80822	6.28378	3.51155	4.44433	5.8201	4.90403	3.59953	0	0	0	0	0
Unigene0001720	280	0	0	0.696786	0.294867	0.161886	0.455209	0	0	0	0	0.196986	0	0	0	0.124997	0.58201	0.223161	0	0	0	0	0	0
Unigene0001721	3244	4.04779	4.5262	8.85588	6.57905	4.03816	4.34161	3.96301	5.02047	4.84705	7.23296	4.72669	4.22355	4.46768	4.01736	3.94873	5.32493	5.52812	4.97842	FAR10related protein [Medicago truncatula]	0	0	GO:0016787//hydrolase activity;GO:0046914//transition metal ion binding	0
Unigene0001722	879	0.694819	1.48288	6.10381	5.7296	8.04456	10.7303	9.13248	3.55073	5.1172	5.04258	6.55723	6.75978	11.0609	10.6392	1.19451	3.93966	3.02118	5.95613	Os12g0621400 [Oryza sativa Japonica Group]	0	0	0	0
Unigene0001723	1292	1.58697	1.60231	1.51006	0.766836	0.421003	0.394609	0.186863	0.131766	0.357071	0.707916	0.554976	0	0	0	0.325069	0.252264	0.120908	0.778388	Cinnamoyl CoA reductase [Medicago truncatula]	ko00940//Phenylpropanoid biosynthesis	0	0	0
Unigene0001724	1454	0.240026	0.263664	0.402545	0.283916	0.0623494	0	0	0	0.0528812	0.0483879	0.151736	0	0	0	0	0	0.0859492	0.0813721	Cinnamoyl CoA reductase [Medicago truncatula]	ko00940//Phenylpropanoid biosynthesis	0	0	0
Unigene0001725	325	0.671149	0	0.450231	0	0	0	0.371426	0	0	0	0	0	0	0	0.969206	1.00285	0.769047	0.0910116	30ketoacyl0CoA synthase [Medicago truncatula]	0	0	GO:0016746//transferase activity, transferring acyl groups	GO:0006631//fatty acid metabolic process
Unigene0001726	233	0.561691	0	0.209335	0	0.389082	0.547033	0.259042	0	0	0	0	0	0	0	0	0	0	0	0	0	0	0	0
Unigene0001727	209	1.04365	1.10058	0.233373	0.197518	0	0	0	0.271517	0.367891	0.504947	0	0	0	0.288683	0.33492	0	0	0.990676	PREDICTED: probable glutathione S0transferase [Vitis vinifera]	0	0	GO:0016765//transferase activity, transferring alkyl or aryl (other than methyl) groups	0
Unigene0001728	920	0.948363	1.37512	0.636196	0.717936	0.541966	0.69271	0.196816	0.431771	0.501451	0.650028	0.419666	0.911793	0.393836	0.262325	0.836935	0.487117	0.271674	0.38581	0	0	0	0	0
Unigene0001729	494	0.618164	0	0.789879	0.501393	0.367029	0.38702	0.244359	0.689236	0	0.640895	0	0.849038	1.34468	0	0.212545	0.164942	0	0	Kinesin04 [Medicago truncatula]	0	GO:0005875//microtubule associated complex;GO:0043231//intracellular membrane0bounded organelle	GO:0032550;GO:0003774//motor activity;GO:0015631//tubulin binding	GO:0045333//cellular respiration;GO:0007017//microtubule0based process
Unigene0001730	319	1.64105	1.44214	2.2935	2.71758	1.56304	1.59823	0.946031	1.06734	0.482064	1.32331	0.950967	0	0.946523	0.945687	1.86516	1.91571	1.27321	0.741787	Kinesin04 [Medicago truncatula]	0	GO:0005875//microtubule associated complex;GO:0043231//intracellular membrane0bounded organelle	GO:0032550;GO:0003774//motor activity;GO:0015631//tubulin binding	GO:0045333//cellular respiration;GO:0007017//microtubule0based process
Unigene0001731	1097	1.51116	1.46777	1.42279	1.27946	2.14864	4.87991	1.3755	2.58647	3.11902	2.7578	2.21228	2.86753	3.19281	2.14499	1.72284	1.63409	3.01888	2.02225	Hop0interacting protein THI015 [Solanum lycopersicum]	0	0	GO:0046914//transition metal ion binding	0
Unigene0001732	952	0.0916485	0.0805395	0.102469	0.173451	0.190454	0	0.1268	0.35765	0.080766	0.44342	0.405559	0.587429	0.507464	0.380261	0.0735275	0.770308	0.721991	0.248561	Hop0interacting protein THI015 [Solanum lycopersicum]	0	0	GO:0046914//transition metal ion binding	0
Unigene0001733	271	2.41465	3.11221	3.59963	2.13261	4.68334	6.34941	8.68603	2.09399	2.41165	1.81731	2.44233	5.93282	4.01102	7.1244	2.84125	3.30736	1.84458	1.30976	0	0	0	0	0
Unigene0001734	862	5.71878	5.29243	7.63878	9.2428	7.30928	9.16755	4.20117	4.60823	6.11011	5.26446	6.71855	4.70352	3.08246	3.84967	5.35949	6.66408	9.45975	8.13244	Os05g0215600 [Oryza sativa Japonica Group]	0	GO:0009536//plastid	0	GO:0009814//defense response, incompatible interaction
Unigene0001735	779	0.392006	0.590554	0.81396	0.794891	1.10556	1.55437	1.1622	1.16554	0.641566	1.67084	0.460224	0.358943	1.08528	1.31668	0.584067	1.15057	0.561483	0.987224	0	0	0	0	0
Unigene0001736	298	1.61031	2.95888	3.76451	1.38528	3.65058	2.99399	0	2.8564	5.54738	6.49258	1.94342	3.75324	3.64761	1.21479	0.35234	0.683569	0.209681	0.595546	0	0	0	0	0
Unigene0001737	466	1.12338	1.31628	1.46534	0.531519	0.875434	1.23082	0.129521	2.9226	1.97998	1.88723	1.18361	2.70016	1.1663	1.29474	1.05147	1.48625	1.13975	0.761685	0	0	0	0	0
Unigene0001738	280	4.36247	3.28601	1.56777	3.0961	6.7992	7.73856	5.389	0	0	0	0.098493	0.249657	0.431344	0	0	0	0	0.316915	0	0	0	0	0
Unigene0001739	340	0.128308	0	0.71728	0.242831	1.33318	2.43671	1.42016	0	0.45229	0.413859	0	0	0	0.532366	0.205877	0	0.0918898	0.173993	0	0	0	0	0
Unigene0001740	643	0	0.178865	0.379277	0.706212	0.634451	0.693787	1.12641	0.264761	0.538105	0.164128	0.171559	0.652293	0.469582	1.126	0	0.316802	0.145766	0.184005	0	0	0	0	0
Unigene0001741	372	0.117271	0	0.786694	0.554857	0	0.513946	0	0	0	0	0	0	0	0	0	0	0	0	gag0pol polyprotein [Phaseolus vulgaris]	0	0	GO:0005488//binding	0
Unigene0001742	220	0	0	3.10386	0	0	0	0	0.773824	1.57273	1.2792	0	0	0	0	0	0.37037	0	0	0	0	0	0	0
Unigene0001743	843	0.931488	1.81906	0.867883	1.37115	1.34425	1.88996	1.21716	0.740472	1.09451	1.33535	0.588855	1.74138	1.4327	2.21872	1.32855	1.15988	0.630039	0.631575	0	0	0	0	0
Unigene0001744	506	7.5869	4.54586	6.65114	8.81103	5.55403	4.03031	4.53272	5.15883	5.47038	7.92548	6.04973	6.21677	6.32525	5.00803	4.5651	6.3607	6.35965	9.00223	acyl0coA oxidase [Trifolium repens]	ko04146//Peroxisome;ko00071//Fatty acid metabolism;ko00592//alpha0Linolenic acid metabolism;ko03320//PPAR signaling pathway;ko01040//Biosynthesis of unsaturated fatty acids	GO:0042579//microbody	GO:0000166//nucleotide binding;GO:0016634	GO:0009062//fatty acid catabolic process;GO:0035966;GO:0006511//ubiquitin0dependent protein catabolic process;GO:0043623//cellular protein complex assembly;GO:0048588//developmental cell growth;GO:0009725//response to hormone stimulus
Unigene0001745	567	1.00021	0.811361	1.46239	1.67455	0.87938	1.46117	1.59674	2.10174	1.62729	1.36493	0.826854	0.739726	0.319514	1.06411	1.29626	1.0778	1.32244	0.626006	DNA0directed RNA polymerase [Medicago truncatula]	0	GO:0031224//intrinsic to membrane;GO:0009526//plastid envelope;GO:0009534//chloroplast thylakoid	GO:0003676//nucleic acid binding;GO:0004175//endopeptidase activity;GO:0034062//RNA polymerase activity;GO:0016791//phosphatase activity	GO:0009416//response to light stimulus;GO:0009059//macromolecule biosynthetic process;GO:0016485//protein processing
Unigene0001746	646	0.135061	0.415414	0.151006	0.127806	0.140334	0.591913	0	0.439219	0.178535	0.544551	0.0853809	0	0.560881	0.466988	0.325069	0.189198	0.290178	0	DNA0directed RNA polymerase [Medicago truncatula]	0	GO:0031224//intrinsic to membrane;GO:0009526//plastid envelope;GO:0009534//chloroplast thylakoid	GO:0003676//nucleic acid binding;GO:0004175//endopeptidase activity;GO:0034062//RNA polymerase activity;GO:0016791//phosphatase activity	GO:0009416//response to light stimulus;GO:0009059//macromolecule biosynthetic process;GO:0016485//protein processing
Unigene0001747	351	0	0	0.27792	0.117611	0.258279	0.907825	0	0.161673	0.547644	0.400889	0.392849	0.796628	1.54842	2.06273	0.598275	0.812493	0.979111	0.42135	0	0	0	0	0
Unigene0001748	220	0	0	0	1.50114	0	0	0	0	0	0	4.38741	0	0	0	0	0	0.568046	1.47894	PREDICTED: transcription factor GTE120like [Cicer arietinum]	0	0	0	0
Unigene0001749	639	0	0	0	0.129206	0.141872	0.199466	0.18891	0	0	0	0	0.218792	0	0	0	0	0	0	0	0	0	0	0
Unigene0001750	662	0	0	0.294713	0.0623585	0	0.192536	0	0	0	0	0	0	0	0	0	0	0	0.0446809	0	0	0	0	0
Unigene0001751	273	1.11858	0.140428	0.535989	0.453641	0.830184	0.233441	0.442174	0.831459	0.563291	0.386571	0.202037	1.28029	0	0.442013	0.128202	0.149233	0	0	0	0	0	0	0
Unigene0001752	242	0	0	1.00775	0.341168	0.187306	0.790033	0	0	0	0	0	0	0	0	0.144624	0	0	0.122226	0	0	0	0	0
Unigene0001753	439	3.6768	2.00853	4.44419	3.85543	2.99433	6.09711	2.61225	5.17058	5.51711	4.80793	3.14101	3.34393	3.43896	1.0995	2.71064	5.19699	4.34122	3.23412	0	0	0	0	0
Unigene0001754	366	0.595966	0.209491	0.399795	0.563953	0	0.174124	0	0.310093	0	0.0961148	0.0753498	0	0.32999	0.164849	0.47813	0	0	0.242449	0	0	0	0	0
Unigene0001755	512	3.40818	4.26796	4.95371	2.66071	5.40041	9.9577	5.06903	3.32503	2.70314	2.26733	2.58544	5.05166	4.95372	3.88877	3.28116	2.86458	1.89164	2.07976	0	0	0	0	0
Unigene0001756	369	0	0	1.98272	0.559368	0.24568	5.00854	0	0	0.312558	0.381333	0.597898	0	2.29115	0	0	0.220817	0.423341	0.240478	hypothetical protein MTR_2g075940 [Medicago truncatula]	0	0	0	0
Unigene0001757	2194	7.35695	5.90603	4.86861	11.9667	4.40058	2.43995	5.83211	2.09504	2.26042	5.99661	8.69827	4.36502	2.44966	3.49249	0.334996	0.371383	1.78	3.62657	Major facilitator superfamily protein [Theobroma cacao]	0	GO:0031224//intrinsic to membrane	0	GO:0044763
Unigene0001758	343	1.90779	2.01184	1.56421	2.40707	0.925062	3.15859	1.58371	2.81254	3.25042	3.89727	1.44724	0.611406	0.528177	0.703613	0	0	0	0	0	0	0	0	0
Unigene0001759	1384	0.630415	0.5817	0.986778	0.656206	0.393018	1.01304	0.130831	0.410022	0.638892	0.482935	0.199263	0.303052	0.436331	0.261567	0	0	0	0	0	0	0	0	0
Unigene0001760	3281	4.61377	5.05938	6.31801	4.54208	5.01496	6.33214	5.07725	5.43084	4.394	3.89199	2.94188	3.98417	4.767	5.02024	4.42689	4.24667	3.17091	2.98402	PREDICTED: pentatricopeptide repeat0containing protein At5g16420, mitochondrial0like [Cicer arietinum]	0	0	0	0
Unigene0001761	220	0	0	0.443409	0	0	0	0.548698	0	0	0	0	0.317746	0.274492	0.548498	0	0	0	0	PREDICTED: uncharacterized protein LOC101499676 [Cicer arietinum]	0	0	0	0
Unigene0001762	620	0.492537	0.432835	1.25871	0.532662	0	0.205578	0.0973497	0.274583	0.24803	0.567387	0.311365	0.225497	0	0.0973142	0	0.591397	0.403129	0	neoxanthin synthase, partial [Malus domestica]	0	GO:0009526//plastid envelope;GO:0009503	0	GO:0009687//abscisic acid metabolic process;GO:0009416//response to light stimulus;GO:0016116//carotenoid metabolic process;GO:0042554//superoxide anion generation;GO:0042743//hydrogen peroxide metabolic process
Unigene0001763	358	0.36557	1.92755	2.8611	2.65215	0.633073	1.2461	1.34876	2.06065	1.50342	3.04614	3.15838	0.195263	0.168682	0.168533	1.56421	2.50362	1.39631	1.73507	neoxanthin synthase, partial [Malus domestica]	0	GO:0009526//plastid envelope;GO:0009503	0	GO:0009687//abscisic acid metabolic process;GO:0009416//response to light stimulus;GO:0016116//carotenoid metabolic process;GO:0042554//superoxide anion generation;GO:0042743//hydrogen peroxide metabolic process
Unigene0001764	221	2.76356	1.04082	3.08982	3.36228	10.0501	7.78593	7.37391	2.31097	1.91353	1.11424	1.49745	7.9077	8.74399	10.3743	2.53387	3.5026	2.2619	2.00761	Os07g0596300 [Oryza sativa Japonica Group]	0	0	0	0
Unigene0001765	319	0.273509	0.240356	0.1529	0	0	0.399557	0.567619	0	0.120516	0.220552	0.0864515	1.09568	0	0.567412	0.109715	0	0	0.185447	hAT family dimerisation domain containing protein [Oryza sativa Japonica Group]	0	0	0	0
Unigene0001766	1573	1.71947	3.16833	5.6744	3.62163	6.5413	3.52476	7.25202	3.49934	4.25261	4.78582	4.08498	7.42148	5.52823	9.16721	3.76023	3.626	3.27719	4.09928	RING zinc finger protein0like protein [Medicago truncatula]	0	0	0	0
Unigene0001767	995	0.350751	0.500883	0.882362	0.705309	1.73112	2.30578	3.27564	0.456258	0.618205	0.74245	2.02331	1.2646	1.39591	3.27445	0.316575	0.4504	0.816388	1.48637	PREDICTED: O0glucosyltransferase rumi homolog isoform X1 [Cicer arietinum]	0	0	0	0
Unigene0001768	2023	0.172515	0.379009	0.578646	0.591774	0.313689	0.189014	0.238682	0.617121	0.589117	0.573838	0.436232	0.310992	0.179105	0.477191	0.207607	0.443053	0.555972	0.555607	PREDICTED: protein tipD0like [Cicer arietinum]	0	GO:0031234//extrinsic to internal side of plasma membrane	GO:0004683//calmodulin0dependent protein kinase activity;GO:0036094	GO:0032502//developmental process
Unigene0001769	2131	0.163772	0.503721	0.27466	0.232462	0.446686	0.35887	0.226586	0.0532587	0.0360813	0.066031	0.0517654	0.0656068	0	0.113252	0.0821189	0.0573544	0.0879658	0	PREDICTED: protein tipD0like [Cicer arietinum]	0	GO:0031234//extrinsic to internal side of plasma membrane	GO:0004683//calmodulin0dependent protein kinase activity;GO:0036094	GO:0032502//developmental process
Unigene0001770	304	5.30959	4.7921	5.93643	4.75278	1.93837	2.09636	1.38979	4.1067	5.81728	4.51297	3.44725	2.75937	2.58239	1.19082	4.72027	4.42251	3.39146	2.62706	hypothetical protein MTR_3g109470 [Medicago truncatula]	0	0	GO:0097159;GO:1901363	0
Unigene0001771	1938	0.787856	0.652794	2.99496	6.66721	2.40907	1.94016	4.45357	1.93256	1.22991	3.46698	2.80334	1.55102	1.74496	2.14814	0.902969	1.4295	1.66046	3.20513	Synaptotagmin01 [Medicago truncatula]	0	GO:0016020//membrane	0	GO:0006694//steroid biosynthetic process;GO:0016104//triterpenoid biosynthetic process
Unigene0001772	909	0.143976	0	0	0	0.149597	0.210328	0	0	0	0	0.0606777	0.153804	0	0.13275	0	0.0896385	0	0.13016	PREDICTED: synaptotagmin030like [Cicer arietinum]	0	GO:0016020//membrane	0	GO:0006694//steroid biosynthetic process;GO:0016104//triterpenoid biosynthetic process
Unigene0001773	355	1.10598	1.51187	1.09916	0.232571	0.383054	0.718077	0.680076	0	0	0	0	0	0	0	0.591534	0.229525	0.704057	0.583243	0	0	0	0	0
Unigene0001774	227	0	0	0.429736	0.181856	0.399366	0	0.531778	0	0	0	0	0	0.266027	0	0	0	0	0.130303	0	0	0	0	0
Unigene0001775	733	6.30862	5.54393	5.12371	5.40656	1.23678	2.17358	1.23513	2.32253	1.46855	2.01566	1.24158	0.190734	0.906235	0.740809	4.2973	4.22414	3.11147	2.34047	Glucosyltransferase [Medicago truncatula]	0	0	GO:0016757//transferase activity, transferring glycosyl groups	0
Unigene0001776	272	0.481155	0.563776	1.07592	0.15177	0.333294	0	0	0	0.565362	0	0.405559	0	0.444031	0	0.514692	0.299564	0.114862	0.326236	0	0	0	0	0
Unigene0001777	757	0.518656	0.709003	0.902048	0.599861	0.718542	1.43117	0.318926	0.0749632	0.304713	0.0929406	0.0364307	0.461718	0.079773	0.159405	0.970913	0.645824	0.412715	0.156295	0	0	0	0	0
Unigene0001778	299	0.145902	0	0.163127	0.966452	1.36439	0.426283	0.403724	0	0	0	1.01458	0	0	0	0.117054	0.40877	0.626941	1.58281	PREDICTED: FK5060binding protein 30like isoform X2 [Cicer arietinum]	ko03008//Ribosome biogenesis in eukaryotes	GO:0044424//intracellular part	0	GO:0003006//developmental process involved in reproduction;GO:0006605//protein targeting
Unigene0001779	224	0	1.02688	0.653237	0.552875	0.404715	0.569012	0.26945	0	0.343255	0	0.123116	0.312072	0	1.61611	0	0.181878	0	0.264096	0	0	0	0	0
Unigene0001780	1728	0	0	0.112905	0.238897	0	0	0	0.0328398	0.0667441	0.407153	0.0478785	0	0	0	0	0	0	0	Pentatricopeptide repeat0containing protein [Medicago truncatula]	0	0	0	0
Unigene0001781	2342	1.19214	1.064	2.45749	2.82024	0.735468	0.653076	0.824687	1.74457	1.09982	2.11789	1.35417	1.10438	2.39799	1.41691	0.792037	0.817598	0.680346	0.543077	Pentatricopeptide repeat0containing protein [Medicago truncatula]	0	0	0	0
Unigene0001782	2355	9.24362	9.14874	6.04769	4.01419	3.13735	3.05792	2.81921	5.95182	4.66886	5.36259	11.7338	2.81991	2.79504	2.07521	6.62828	5.2418	4.69633	7.10895	Pentatricopeptide repeat0containing protein [Medicago truncatula]	0	GO:0009536//plastid	0	0
Unigene0001783	361	1.0876	0.424784	0.270222	1.14353	0.376687	1.23575	0.835967	0.943165	1.38443	1.2668	0.458361	1.9364	0.836402	1.33706	0.290851	0.22571	0.692355	1.06516	0	0	0	0	0
Unigene0001784	433	4.43299	3.45297	3.0414	2.66946	7.95596	11.6273	6.13325	3.01428	2.57481	1.54361	1.97441	3.22883	4.7418	4.73761	1.45493	3.10495	1.44307	1.29791	0	0	0	0	0
Unigene0001785	308	0.141639	0	0.316721	1.3403	0.294338	0.413827	0.391927	0	0	0	0	0	0	0	0	0	0	0	0	0	0	0	0
Unigene0001786	350	2.11891	3.50508	3.06586	2.24099	3.62624	3.82376	2.75917	2.59415	1.86731	0.804069	1.18192	2.59644	3.10568	1.72385	1.89995	1.74603	0.803379	1.26766	0	0	0	0	0
Unigene0001787	308	0.99147	0.24894	12.1938	8.30988	1.17735	0.62074	5.09505	0.921219	1.49784	12.5636	3.04433	0.226961	0.392131	1.37125	0.227267	2.38095	11.8681	5.95417	Tubulin alpha05 chain [Medicago truncatula]	ko04145//Phagosome;ko04540//Gap junction;ko05130//Pathogenic Escherichia coli infection	GO:0032991//macromolecular complex;GO:0015630//microtubule cytoskeleton	GO:0017111//nucleoside0triphosphatase activity;GO:0032550;GO:0005198//structural molecule activity	GO:0009154;GO:0043623//cellular protein complex assembly;GO:0007017//microtubule0based process
Unigene0001788	1595	0	0.0480712	0	22.103	0	0	0	0	0	0.0882207	12.5182	0	0	0.0756549	0	0.0510855	0.117527	13.6489	PREDICTED: adipocyte plasma membrane0associated protein0like [Cicer arietinum]	0	0	0	0
Unigene0001789	724	0	0	0	1.02633	0	0	0	0	0	0	0.457094	0	0	0	0	0	0	0.163419	PREDICTED: adipocyte plasma membrane0associated protein0like [Cicer arietinum]	0	0	0	0
Unigene0001790	2115	2.55767	1.32321	1.08389	6.1678	2.95757	2.3503	7.87635	0.134154	0.581668	3.24336	6.27188	2.31361	1.88445	5.93364	0.215124	0.0963137	1.55105	5.04867	GT02 factor [Medicago truncatula]	0	0	GO:0005488//binding	0
Unigene0001791	806	0.432999	0.380514	0.363089	0.20487	0.112476	0.790686	0.149769	0.0704058	0.0953961	0.0872903	0.205296	0.346919	0	0.299428	0	0.101094	0.116287	0	GATA transcription factor [Medicago truncatula]	0	0	GO:0005488//binding	0
Unigene0001792	664	1.4454	0.461889	1.02839	0.870389	0.546121	1.34369	1.45438	0.6837	0.810579	0.688726	1.20446	1.26333	1.45514	0.545194	0.421676	0.613565	0.611676	1.20275	PREDICTED: GATA transcription factor 90like [Cicer arietinum]	0	0	GO:0005488//binding	0
Unigene0001793	573	0.304535	1.33811	0.680977	0.648398	1.10749	2.00197	0.737343	1.9807	0.805123	0.859497	0.673809	1.46396	2.74013	2.10593	0	0	0	0	0	0	0	0	0
Unigene0001794	680	0.384924	0.22551	0.35864	0.607078	0.0666589	1.12463	1.24264	0.333807	0.282681	0.569056	0.283891	0.411201	0	0.532366	0	0	0	0	0	0	0	0	0
Unigene0001795	1577	3.65153	4.74044	5.69093	4.08363	4.80011	6.46588	3.1384	4.64196	3.75426	3.79218	4.19704	5.27494	4.71005	4.09374	4.83817	4.10766	5.30945	3.43241	PREDICTED: probable isoaspartyl peptidase/L0asparaginase 40like [Glycine max]	0	0	0	0
Unigene0001796	882	0.544072	4.30311	5.91715	13.3392	1.23342	0.578043	1.57393	0.70773	0.566644	1.03699	3.25183	0.634051	0.273869	1.09451	0.634904	1.01621	1.31063	2.34752	Salt0tolerance protein [Medicago truncatula]	0	GO:0044464//cell part	GO:0046914//transition metal ion binding	0
Unigene0001797	514	2.03695	2.38673	0.664251	2.08816	0.352747	1.8598	0.117426	0	0	0	0	0	0	0.234766	0	0	0	0	0	0	0	0	0
Unigene0001798	1162	0.375428	0.263937	0.503701	0.461839	0.234052	0.658134	0	0	0.0661697	0.302737	0.237332	0.360951	0.259846	0.311539	0.391556	0.350609	0.376416	0.738196	PREDICTED: peptide chain release factor 20like [Cicer arietinum]	0	GO:0009536//plastid	GO:0008079//translation termination factor activity	GO:0006412//translation;GO:0006779//porphyrin0containing compound biosynthetic process
Unigene0001799	1176	0.519342	0.880181	0.953933	0.596754	1.38759	1.62575	0.359267	1.0616	0.751893	0.508526	0.820775	0.594423	0.872959	1.12871	0.624984	0.935374	0.451635	1.00608	PREDICTED: peptide chain release factor 20like [Cicer arietinum]	0	GO:0009536//plastid	GO:0008079//translation termination factor activity	GO:0006412//translation;GO:0006779//porphyrin0containing compound biosynthetic process
Unigene0001800	865	0.1513	0.4432	0.62026	0.286344	0.838437	0.442053	0.697766	0.328018	0.266668	0.0813364	0.0318821	0.565698	0.279252	0.418507	0.323691	0.188396	0.180593	0.13678	0	0	0	0	0
Unigene0001801	538	0.24326	0.213774	0.725279	0.383655	1.34805	0.947647	0.336562	0.105478	0.0714584	0.261546	0.0512603	0.129933	0.112246	0.224293	0.390324	0.302905	0.290358	0.164937	0	0	0	0	0
Unigene0001802	1326	11.6793	11.5357	4.78186	2.95756	0.957153	0.624797	0	8.90151	9.21975	3.95288	3.0157	1.05436	1.093	0.0910027	11.7455	7.52751	8.57638	4.57289	PREDICTED: zinc finger protein 30like [Cicer arietinum]	0	0	0	GO:0044260;GO:0003006//developmental process involved in reproduction;GO:0010033//response to organic substance;GO:0009913//epidermal cell differentiation;GO:0009058//biosynthetic process;GO:0007165//signal transduction;GO:0044238//primary metabolic process;GO:0016043//cellular component organization;GO:0044767;GO:0006952//defense response
Unigene0001803	724	1.26536	2.59462	3.84002	3.19303	5.07123	5.10539	6.83599	1.80274	2.12401	1.21471	2.32356	2.89658	4.25386	5.50013	1.45024	1.57561	2.97753	3.43179	PREDICTED: sulfated surface glycoprotein 1850like [Cicer arietinum]	0	0	0	0
Unigene0001804	260	0.335575	0.147449	0	0.158774	0	0.735338	0	0	0	0	0.106069	0	0.232262	0	0.134612	0	0	0	Ser/Thr protein kinase [Medicago truncatula]	0	GO:0031224//intrinsic to membrane	GO:0001871;GO:0004672//protein kinase activity;GO:0032550	GO:0006796//phosphate0containing compound metabolic process;GO:0006464//protein modification process
Unigene0001805	363	0.240356	0	0.537466	0	1.12384	1.22894	0.831361	0	0.211816	0.0969091	0.0759725	0.962866	1.33087	1.4959	0	0.112233	0	0.0814842	Receptor0like kinase [Medicago truncatula]	0	GO:0031224//intrinsic to membrane	GO:0004672//protein kinase activity;GO:0032550	GO:0006796//phosphate0containing compound metabolic process;GO:0006464//protein modification process
Unigene0001806	224	2.14228	1.71146	3.70168	2.02721	5.46365	4.55209	3.50285	2.28002	1.20139	0.471134	1.72363	2.80865	4.85262	3.77093	0.78123	1.6369	2.23161	1.45253	Transcription elongation factor SPT6 [Medicago truncatula]	0	GO:0005737//cytoplasm;GO:0005634//nucleus	GO:0003723//RNA binding;GO:0043566//structure0specific DNA binding	GO:0009414//response to water deprivation;GO:0010467//gene expression;GO:0090304;GO:0031323//regulation of cellular metabolic process;GO:0009791//post0embryonic development;GO:0048608//reproductive structure development;GO:0034645//cellular macromolecule biosynthetic process;GO:0009409//response to cold
Unigene0001807	2175	4.47279	4.88243	6.75001	5.99765	4.96003	5.01044	5.2448	4.69631	4.96687	5.87109	5.30005	4.33887	3.99811	4.3552	4.31253	5.76926	5.98995	5.98375	PREDICTED: methyltransferase0like protein 130like isoform X1 [Cicer arietinum]	0	0	0	0
Unigene0001808	591	0.369075	0.648677	1.07289	0.6985	0.230091	1.07833	0.510633	0.480094	0.2602	0.357137	0.373307	0.473124	0.10218	0.204179	0.296101	0.13787	0.528638	0.250243	0	0	0	0	0
Unigene0001809	955	0.0456803	0.0802865	0.868246	0.99421	9.30292	8.74192	12.6402	0.237684	0.161025	0.478863	1.76153	9.14975	6.95571	12.0038	0.293186	0.383944	1.17773	2.53975	0	0	0	0	0
Unigene0001810	3313	3.16026	2.66147	3.6953	3.27709	5.33593	8.21383	5.30149	3.10028	2.80821	2.55898	2.29748	5.54928	5.75994	4.80784	2.31355	2.49634	1.85777	2.3838	PREDICTED: exocyst complex component 70like [Glycine max]	ko04910//Insulin signaling pathway	0	0	0
Unigene0001811	202	0.215964	0.569358	0.482921	0.408726	0.673188	0.946475	0	0	0	0.696594	0.409575	1.03818	0.597903	0.597374	0	0	0	0.14643	PREDICTED: NAC domain0containing protein 1000like [Cicer arietinum]	0	0	GO:0003676//nucleic acid binding	GO:0006351//transcription, DNA0dependent
Unigene0001812	309	0.847082	0.868471	1.10494	0.534386	0.586771	1.44371	1.36731	0.550943	1.36858	0.683068	0.446246	0	0.390862	1.17155	1.01939	0.659235	0.202217	0.0957241	0	0	0	0	0
Unigene0001813	274	0	0.559661	0	0.602647	0.661723	0.697766	0.44056	0	0	0.385161	0.704548	0.510249	0	0.4404	0	0	0	0.107952	Auxin0induced protein0like protein [Medicago truncatula]	ko04075//Plant hormone signal transduction	0	0	0
Unigene0001814	856	0.917342	0.358288	0.911682	0.385807	0.688393	0.893401	0.282041	0.79552	0.583855	0.821916	0.193304	0.816637	0.70547	0.422907	0.613302	0.475943	0.583973	0.345546	0	0	0	0	0
Unigene0001815	1609	0.406694	0.619488	0.485022	0.410504	0.591603	0.514904	0.300096	0.599565	0.860165	0.349812	0.274238	0.608239	0.75063	0.374983	0.63081	0.936859	0.640773	0.569883	0	0	0	0	0
Unigene0001816	280	0.62321	0.136917	0	0.294867	0.647543	0	0.86224	0	0.549209	0	0	0.249657	0	0.215481	0	0.436508	0	0.211277	0	0	0	0	0
Unigene0001817	290	0	0	0	0.142349	0.312607	0	0	0	0.132568	0	0	0	0	0	0	0.140485	0.107733	0.101996	0	0	0	0	0
Unigene0001818	723	0	0	0	0.114195	0	0	0.083481	0	0	0	0	0	0	0	0	0	0	0	Leucoanthocyanidin reductase [Medicago truncatula]	ko00941//Flavonoid biosynthesis	0	GO:0016726//oxidoreductase activity, acting on CH or CH2 groups, NAD or NADP as acceptor	GO:0044710
Unigene0001819	1293	0.472348	0.533691	0.980781	1.309	12.1295	1.57721	2.33398	0.702207	0.951452	0.598543	0.106644	0.108127	0.0467039	0	0.784976	0.661682	0.77321	0.160133	Leucoanthocyanidin reductase [Medicago truncatula]	ko00941//Flavonoid biosynthesis	0	0	0
Unigene0001820	310	2.2516	2.72068	1.10137	1.19849	0.584878	0.411157	0.778797	3.11194	1.73621	1.36173	0.533768	0.676491	0.584402	0.194628	2.82251	0.919952	1.10861	0.763323	0	0	0	0	0
Unigene0001821	217	0.804142	0	0	0.380473	0.208885	0	0	0.523015	0	0.324221	0	0	0.83486	0.834122	0.161286	0	0	0	0	0	0	0	0
Unigene0001822	242	0	0	0	4.77635	0	0	0	0	0	0	0.569794	0	0	0	0	0	0	2.3223	F0box/FBD/LRR0repeat protein [Medicago truncatula]	0	0	0	0
Unigene0001823	915	0.429095	0.502778	0.79959	0.496278	0.445849	1.81089	0.52771	0.0620187	0	0.0384459	0	0	0	0.131879	0.573756	0.712406	0.682897	0.161633	0	0	0	0	0
Unigene0001824	581	3.45393	2.77133	4.61726	3.33945	4.29095	5.9232	3.53207	7.42303	8.40356	8.35553	9.01863	8.78313	6.96387	9.13849	7.28897	9.95728	12.8519	9.72383	0	0	0	0	0
Unigene0001825	202	0.431928	0.379572	0.24146	0.204363	0	0.630983	0	0.280926	0	0	0	0	0	0	0.173263	0	0.154666	0	0	0	0	0	0
Unigene0001826	1760	10.2369	10.6951	6.31858	11.9622	2.29216	1.26734	1.54321	7.86721	5.52641	14.451	26.5752	1.03267	0.823475	1.097	5.26975	5.74074	10.2781	17.1086	Receptor protein kinase [Medicago truncatula]	0	GO:0009536//plastid	0	GO:0009987//cellular process
Unigene0001827	213	0.204811	0.35997	0	0.193809	0	0	0	0	0	0	0.517897	0.328188	0	0	0.492945	0.573813	0.880071	0.833205	0	0	0	0	0
Unigene0001828	961	0.18158	0.319141	1.26886	0.687306	0.471676	0.397894	1.0049	0.2362	0	0.402662	0.0286972	0.436446	0.0628389	0.251133	0.437033	0.847882	0.195063	0.584804	OSJNBa0089N06.9 [Oryza sativa Japonica Group]	0	0	0	0
Unigene0001829	543	0	0	0.17965	0.0760245	0	0.23473	0.111154	0	0	0	0	0	0	0	0	0.150058	0	0	OSJNBa0089N06.9 [Oryza sativa Japonica Group]	0	0	0	0
Unigene0001830	637	2.25999	4.57393	4.0582	2.78665	4.90994	6.50299	3.69531	4.09791	3.68151	3.25825	2.16468	3.51167	2.55963	2.46265	4.01088	4.66887	2.30518	2.6932	0	0	0	0	0
Unigene0001831	264	0.165245	0.145215	0.369508	0.312737	0.515091	0.482798	0	0.214951	0	0.533	0.522311	0.264788	0.457486	0	0.265145	0.154321	0.236686	0.448163	0	0	0	0	0
Unigene0001832	551	0.395868	0.41746	0.531125	0.149841	0.65812	0.693967	0	0.102989	0.0697724	0	0	0	0	0	0.508154	1.33091	0.567015	0.26841	0	0	0	0	0
Unigene0001833	1043	4.55905	4.52102	4.53612	3.36425	4.82398	7.08782	5.09242	3.64531	4.86547	2.93431	2.32681	5.02666	5.26877	6.88384	4.86565	5.74198	4.19363	4.70765	OSIGBa0159F11.12 [Oryza sativa Indica Group]	0	0	0	0
Unigene0001834	339	0.643432	0	0.431637	0.730643	0.935977	0	0.356087	0.669582	0.226812	0.10377	0.244053	0	0.890681	0.177979	0	0.240358	0.184322	0.261759	0	0	0	0	0
Unigene0001835	324	0	0.70994	0.903241	0.509646	0.279803	0.196695	0.558859	0	0	0.434296	0.0851174	0.64726	0.372767	0	0.324066	0.251486	0.192855	0.182585	0	0	0	0	0
Unigene0001836	519	0.504332	0.4432	0.939788	1.67034	0.436686	1.22792	0.930355	0.546697	0.814818	0.338902	0.743916	0.40407	0.23271	0.697512	0.269742	0.392492	0.24079	0.227967	0	0	0	0	0
Unigene0001837	323	0.675305	0.474759	0.453019	0.255612	0.842007	0.789217	1.4949	0.878438	1.19024	0.544551	0.512285	1.29853	1.30872	1.86795	0.216713	0.756793	0.580357	0.274725	0	0	0	0	0
Unigene0001838	322	0	0	0	0.128203	0	0.791668	0.56233	0	0	0	0.171292	0	0.187541	0	0	0	0	0.0918595	0	0	0	0	0
Unigene0001839	614	1.9894	2.18532	2.7009	1.94977	2.58385	3.73657	1.57282	0	0	0	0	0	0	0	2.33707	2.32235	1.67916	1.25252	PREDICTED: uncharacterized protein LOC101508009 isoform X2 [Cicer arietinum]	0	0	0	0
Unigene0001840	521	0.418663	0.735831	0.655326	0.475409	0.87002	0.244642	0.231696	0	0	0	0	0	0	0	0.20153	0	0.179899	0.0567731	PREDICTED: uncharacterized protein LOC101508009 isoform X2 [Cicer arietinum]	0	0	0	0
Unigene0001841	211	0	0	0	0	0	0	0	0	0	0	0	0	0	0	0	0	0	0	PREDICTED: phosphate carrier protein, mitochondrial0like [Glycine max]	0	GO:0031224//intrinsic to membrane	0	GO:0051234//establishment of localization
Unigene0001842	260	0	0	0	0.476323	0	0.245113	0	0	0	0	0.106069	0	0	0	0	0	0.360491	0.455058	PREDICTED: phosphate carrier protein, mitochondrial0like [Glycine max]	0	GO:0031224//intrinsic to membrane;GO:0030312//external encapsulating structure;GO:0019866//organelle inner membrane;GO:0009536//plastid	0	GO:0006007//glucose catabolic process;GO:0006970//response to osmotic stress;GO:0051234//establishment of localization
Unigene0001843	798	1.64003	1.58536	3.54505	6.62157	3.12411	6.22918	5.21882	3.0578	3.27598	4.8491	11.2662	2.45278	5.82693	5.74617	2.3245	3.52269	6.22502	8.08041	Cyclophilin0like peptidyl0prolyl cis0trans isomerase family protein isoform 1 [Theobroma cacao]	0	0	0	0
Unigene0001844	1775	0.0983092	0.0431964	2.88528	34.4205	0	0	0	0.447583	0.649768	8.48236	18.2093	0	0	0	0.0788712	0.803338	5.13962	13.6979	PREDICTED: LOW QUALITY PROTEIN: serine carboxypeptidase0like 310like [Cicer arietinum]	ko04142//Lysosome;ko04614//Renin0angiotensin system	0	GO:0004180//carboxypeptidase activity	GO:0019538//protein metabolic process
Unigene0001845	393	1.11004	0.390196	0	0.315125	0.461354	0.648644	0	0.577579	1.2717	0.537069	0.421039	1.24511	0.307319	0.153524	0	0	0	0	PREDICTED: uncharacterized protein LOC101491563 [Cicer arietinum]	0	0	0	0
Unigene0001846	812	5.90975	4.01309	7.08799	6.60908	4.68911	2.74695	5.12884	4.61245	4.87659	7.27821	4.55105	4.73488	5.13151	2.89785	5.34469	7.17478	4.88646	3.97055	PREDICTED: mitogen0activated protein kinase 90like [Cicer arietinum]	0	GO:0043231//intracellular membrane0bounded organelle;GO:0044444//cytoplasmic part;GO:0016020//membrane	GO:0032550;GO:0005515//protein binding;GO:0004702//receptor signaling protein serine/threonine kinase activity	GO:0009725//response to hormone stimulus;GO:0000302//response to reactive oxygen species;GO:0006464//protein modification process;GO:0006796//phosphate0containing compound metabolic process;GO:0006006//glucose metabolic process
Unigene0001847	275	0.634541	0.697032	0	0.300228	0.329658	0	0.438958	2.26988	2.51637	0.76752	0.200567	0.76259	1.97634	1.53579	0.636347	0.296296	0.113609	0.537796	Disease resistance0like protein [Medicago truncatula]	0	0	GO:0016462//pyrophosphatase activity;GO:0032550	GO:0006950//response to stress;GO:0007154//cell communication
Unigene0001848	673	4.34302	5.0698	8.47946	8.77152	1.4144	1.51511	4.75321	14.1657	11.0821	11.2904	10.7362	1.76578	1.88433	4.66183	8.21672	12.5309	13.1841	13.9323	Short internodes [Medicago truncatula]	0	0	0	0
Unigene0001849	261	0.167144	0.587537	1.30814	0	0	0.488347	0	0	0.147297	0.539126	0.105663	0	0	0	0	0.312189	0.239406	0.226657	0	0	0	0	0
Unigene0001850	537	2.43713	3.64092	11.5352	6.14992	2.27906	2.13618	1.01157	5.70641	6.44323	7.7955	4.31388	1.30175	3.4861	3.2583	2.41148	9.33167	5.29436	3.52522	EPIDERMAL PATTERNING FACTOR0like protein [Medicago truncatula]	0	0	0	0
Unigene0001851	308	0.283277	0	1.10852	0.268061	0.588676	0.827653	0.783854	0	0.37446	0.114214	0.268617	0.453923	0	0.587677	0.454534	0.396825	0.101437	0.288105	0	0	0	0	0
Unigene0001852	213	0	0	0	0	0.425615	1.49599	0.283365	0	0	0	0	0	0	0.566524	0	0	0	0.138867	0	0	0	0	0
Unigene0001853	226	0.19303	0	0.215819	0	0	0.281988	0.534131	0	0	0	0	0	0	0	0	0	0	0	0	0	0	0	0
Unigene0001854	276	0	0	0	0.59828	0	0.461806	0	0	0	0	0	0	0.218798	0	0	0	0.45279	0.428678	PREDICTED: probable receptor0like protein kinase At5g390300like [Cicer arietinum]	0	0	GO:0004672//protein kinase activity;GO:0032550	GO:0006796//phosphate0containing compound metabolic process;GO:0006464//protein modification process
Unigene0001855	259	0.168435	0	0	0.159387	0.175012	0	0	0	0.148435	0	0	0	0	0	0	0	0.241255	0.114204	PREDICTED: probable receptor0like protein kinase At5g390300like [Cicer arietinum]	0	0	GO:0001871;GO:0004713//protein tyrosine kinase activity;GO:0032550	GO:0006796//phosphate0containing compound metabolic process;GO:0006464//protein modification process
Unigene0001856	597	4.23825	4.30245	6.37261	7.46798	3.79632	1.60124	3.3363	2.37634	2.51146	5.77461	4.66563	3.39568	4.04611	3.43615	4.33825	5.59588	4.76226	5.84639	PREDICTED: chaperone protein DnaJ0like isoform X2 [Cicer arietinum]	0	0	GO:0043169//cation binding;GO:0032550;GO:0005515//protein binding	GO:0044763;GO:0044267//cellular protein metabolic process;GO:0048856//anatomical structure development;GO:0048229//gametophyte development;GO:0016043//cellular component organization;GO:0006950//response to stress
Unigene0001857	1927	1.60734	2.70566	2.20209	1.3282	2.42283	3.90247	2.3178	2.7387	2.1347	1.33264	1.31665	3.26485	3.47851	1.87861	1.58014	1.71251	1.96178	1.24332	0	0	0	0	0
Unigene0001858	606	0.71988	0.63262	1.44876	0.68121	0.897585	0.420655	0.597592	0.374568	0.888159	0.522446	0.364066	1.49959	1.39511	0.298687	0.462034	1.34458	0.77333	0.878577	0	0	0	0	0
Unigene0001859	1107	0.709345	1.59304	5.37539	5.22076	12.6525	10.9382	9.92316	3.12699	4.48	7.81733	8.52004	4.16772	6.38249	7.3579	1.23303	3.60668	7.19679	10.2871	Carboxy0lyase [Medicago truncatula]	0	0	GO:0003824//catalytic activity	0
Unigene0001860	678	0.19303	1.07433	1.51073	0.669756	0.802266	1.97392	0.445109	0.669582	0.396921	0.20754	0.325404	0.61862	0.890681	0.800904	1.08404	0.721075	0.645126	0.436265	0	0	0	0	0
Unigene0001861	356	0.122541	0.43075	0.685042	0.347876	0.254652	0.179015	0.339083	0	0.10799	0.0988146	0.0774664	0	0.33926	0.33896	0.589872	0.572201	0	0.332346	0	0	0	0	0
Unigene0001862	469	0	0	0.207996	0.792179	0.966482	0.543533	0.386078	0.241992	0.5738	0.300026	0.294009	0.298098	1.15884	0.771874	0	0.0868672	0.13323	0.252271	0	0	0	0	0
Unigene0001863	501	0.17415	0.153041	2.14182	0.329591	0.271425	1.14484	0.120473	0	0.153472	0.140431	0.27523	1.39529	1.08482	0.240857	0.0698585	0.325275	1.12249	0.472316	0	0	0	0	0
Unigene0001864	249	0.525599	1.53963	0.587651	0	0	0	0	0	0.154396	0	0	0	0	0	0	0	0	0	RNA0directed DNA polymerase (Reverse transcriptase) [Medicago truncatula]	0	0	GO:0016772//transferase activity, transferring phosphorus0containing groups;GO:0003676//nucleic acid binding	GO:0006259//DNA metabolic process
Unigene0001865	350	2.61748	3.94321	0.836143	0.70768	0	0	0.517344	6.48538	3.73462	1.40712	0.787944	0	0	0	1.09997	0	0	0	Caffeic acid 30O0methyltransferase [Medicago truncatula]	ko00940//Phenylpropanoid biosynthesis;ko00944//Flavone and flavonol biosynthesis	GO:0043231//intracellular membrane0bounded organelle;GO:0005911//cell0cell junction;GO:0044444//cytoplasmic part;GO:0016020//membrane	GO:0008171//O0methyltransferase activity;GO:0005515//protein binding;GO:0008757//S0adenosylmethionine0dependent methyltransferase activity	GO:0006575//cellular modified amino acid metabolic process;GO:0009699//phenylpropanoid biosynthetic process;GO:0051553;GO:0006595//polyamine metabolic process;GO:0006694//steroid biosynthetic process;GO:0006950//response to stress
Unigene0001866	2302	10.5556	10.6251	11.2509	7.06553	2.26443	2.32548	1.80913	6.31071	5.27737	5.56246	2.38403	5.16234	3.62014	2.80444	11.4332	9.89316	4.95375	2.94246	Condensin02 complex subunit G2 [Medicago truncatula]	0	GO:0043231//intracellular membrane0bounded organelle	GO:0016787//hydrolase activity	0
Unigene0001867	495	1.93888	1.16172	2.56192	3.58605	4.57859	3.21865	0.975463	0.573203	1.32032	2.41627	0.779985	3.95417	1.46396	0.365665	0.565642	0.905349	1.45167	0.717061	PREDICTED: mediator of RNA polymerase II transcription subunit 160like isoform X3 [Cicer arietinum]	0	GO:0043231//intracellular membrane0bounded organelle	0	GO:0006351//transcription, DNA0dependent;GO:0009867//jasmonic acid mediated signaling pathway;GO:0045229//external encapsulating structure organization;GO:0009873//ethylene mediated signaling pathway;GO:0042743//hydrogen peroxide metabolic process;GO:0022610;GO:0007015//actin filament organization;GO:0000904//cell morphogenesis involved in differentiation;GO:0009409//response to cold;GO:0002833;G…
Unigene0001868	335	0	0.572191	0.727985	1.47873	0	0.57071	1.44136	0	0	0	0	0	0	0	1.35817	2.5539	1.02587	1.32442	0	0	0	0	0
Unigene0001869	266	3.77206	4.46782	6.41776	5.27656	2.38569	1.19792	3.40358	1.06667	1.58981	1.85147	1.86618	6.30714	4.08642	3.85598	3.68411	1.99109	1.40944	2.33517	PREDICTED: E3 ubiquitin0protein ligase UPL10like [Glycine max]	ko04120//Ubiquitin mediated proteolysis	0	GO:0019787//small conjugating protein ligase activity	GO:0032446//protein modification by small protein conjugation
Unigene0001870	364	0.119848	0.105321	0	0	0.249055	0.350161	0	0	0	0	0	0	0	0	0	0.559625	0	0	PREDICTED: cationic amino acid transporter 10like [Cicer arietinum]	0	0	GO:0046914//transition metal ion binding;GO:0097159	GO:0006259//DNA metabolic process
Unigene0001871	474	0	0	0.308703	0.174183	0	0.13445	0.25467	0	0.162214	0	0	0.294954	0.254803	0	0.295351	0.0859509	0.131825	0	PREDICTED: cationic amino acid transporter 10like [Cicer arietinum]	0	0	GO:0046872//metal ion binding	0
Unigene0001872	775	0.22516	0.247334	0.125871	0.106532	0.584878	0.164463	0.155759	0	0.297636	0.0907819	0.142338	0	0.545442	0.155703	0.0451601	0	0.120939	0.114498	DNA0directed RNA polymerase subunit beta' [Theobroma cacao]	0	0	0	0
Unigene0001873	702	1.98859	1.41988	1.737	1.29372	2.90564	2.90504	1.2037	2.6676	1.36911	2.95656	3.18208	3.08693	3.18285	2.9222	0.747844	1.10267	0.801091	0.8427	DNA0directed RNA polymerase subunit beta' [Theobroma cacao]	0	0	0	0
Unigene0001874	442	6.218	5.81123	7.06245	6.07078	4.61484	5.04644	2.18486	11.1697	8.26298	7.79965	8.42315	6.95878	5.73824	4.50463	7.12651	6.08345	7.49255	8.23119	PREDICTED: mitogen0activated protein kinase 90like [Cicer arietinum]	0	GO:0043231//intracellular membrane0bounded organelle;GO:0044444//cytoplasmic part	GO:0032550;GO:0004702//receptor signaling protein serine/threonine kinase activity	GO:0006464//protein modification process;GO:0009755//hormone0mediated signaling pathway;GO:0006796//phosphate0containing compound metabolic process
Unigene0001875	207	0.210747	0	0	0.398853	0.437952	0	0	0	0.371446	0	0.266454	0.337701	0	0.291472	0	0.39363	0	0	0	0	0	0	0
Unigene0001876	998	3.40955	5.14742	6.40233	3.92959	5.13233	8.1737	5.50347	5.28806	4.0833	4.7938	3.316	6.23393	5.68787	6.40831	6.27739	4.73539	3.6627	3.64548	0	0	0	0	0
Unigene0001877	320	2.45389	2.27625	2.89602	1.67705	3.3996	8.56362	1.88615	1.77335	1.68195	1.42911	0.603269	1.7476	2.07584	2.82819	2.95305	2.03704	1.26923	1.1092	0	0	0	0	0
Unigene0001878	498	1.5768	1.77057	3.91767	2.73551	5.00611	9.59778	4.60554	4.558	2.08435	2.11916	2.49199	4.6322	7.63947	6.05771	0.98391	2.04522	1.50566	2.49459	PREDICTED: TMV resistance protein N0like [Cicer arietinum]	0	0	GO:0036094;GO:1901363;GO:0097159	0
Unigene0001879	526	4.89326	6.12222	7.88189	7.6912	9.47924	10.2985	11.9337	5.28633	7.23577	5.61778	5.92456	7.57516	9.75855	10.897	9.11573	10.9984	6.88999	6.35437	Glycosyltransferase CAZy family GT8 [Medicago truncatula]	ko00500//Starch and sucrose metabolism;ko00520//Amino sugar and nucleotide sugar metabolism	0	GO:0016740//transferase activity	0
Unigene0001880	1465	3.2458	3.66358	6.55882	7.21367	6.55941	5.52466	7.86904	4.22214	3.54268	6.89153	5.83562	4.81933	4.41061	4.48907	4.01355	4.11579	5.84331	5.51195	PREDICTED: F0box/kelch0repeat protein OR230like isoform X1 [Cicer arietinum]	0	0	0	0
Unigene0001881	750	0.93066	0.102231	0.455233	2.53192	0.846123	1.35956	39.3526	2.0429	1.28149	2.57972	18.3486	3.91463	14.6542	64.5985	5.17987	3.74815	8.28969	12.3442	PREDICTED: inositol oxygenase 10like [Cicer arietinum]	ko00562//Inositol phosphate metabolism;ko00053//Ascorbate and aldarate metabolism	0	0	0
Unigene0001882	1975	9.34342	6.21153	2.69189	5.64352	2.82296	1.96835	2.96436	1.06311	1.34313	5.41474	8.65741	4.24734	2.81302	2.19955	0.779727	1.32021	2.67341	7.86271	PREDICTED: pentatricopeptide repeat0containing protein At2g351300like [Cicer arietinum]	0	GO:0043231//intracellular membrane0bounded organelle	0	0
Unigene0001883	1084	0.201221	0.141464	0	0.0761648	0.418155	0	0.167039	0.157049	0	0.0649041	0.305292	0	0	0.0556594	0	0	0.115286	0.0545734	PREDICTED: pentatricopeptide repeat0containing protein At2g351300like [Cicer arietinum]	0	0	0	0
Unigene0001884	932	1.31061	2.05669	1.88401	2.34754	6.7603	3.69247	3.49707	2.67905	2.43373	2.41566	3.55082	1.6501	2.52697	2.84842	1.3519	2.01081	2.61472	3.71321	PREDICTED: RING0H2 finger protein ATL470like isoform X1 [Cicer arietinum]	0	0	GO:0046914//transition metal ion binding	0
Unigene0001885	828	0.790303	0.694507	5.47835	16.0538	3.77734	3.23265	5.53999	1.23363	1.16077	5.09826	22.0824	2.53276	2.77144	3.64341	0.507233	1.23009	3.05633	15.2181	Os09g0494600 [Oryza sativa Japonica Group]	0	0	0	0
Unigene0001886	1556	5.0746	4.31166	5.76774	8.75504	5.06882	4.17763	5.77967	5.14225	5.13913	7.23455	9.94298	4.17807	4.96767	5.58368	4.27367	5.21041	6.36496	11.5197	PREDICTED: probable purine permease 110like isoform X2 [Cicer arietinum]	0	0	0	0
Unigene0001887	2006	3.52303	3.8031	2.91775	6.62641	3.34424	4.60655	1.44423	3.56437	3.4305	7.61079	6.40646	2.89234	3.37162	2.82725	4.0303	3.43229	3.61329	5.67688	PREDICTED: pentatricopeptide repeat0containing protein At3g189700like [Cicer arietinum]	0	0	0	0
Unigene0001888	383	0.113903	0.200192	0.12735	0.323352	0.2367	0.66558	0.630358	0.29633	0.100378	0.183697	0.0720053	0.182517	0.473015	0	0.0913814	0	0.326293	0.154458	0	0	0	0	0
Unigene0001889	712	0.122541	0.484594	0.342521	0.173938	0.572967	0.716059	0.678166	0.398505	0.323971	0.197629	0.193666	0.39272	0.763334	0.932139	0	0.11444	0.0877599	0	Thioredoxin superfamily protein [Theobroma cacao]	0	0	0	0
Unigene0001890	309	0	0	0	0.133597	0.440078	0.412487	0	0	0	0	0.0892493	0.226227	0	0	0	0	0.202217	0	PREDICTED: redox0regulatory protein FAM213A0like [Cicer arietinum]	0	0	0	0
Unigene0001891	725	4.81376	6.02813	5.24752	2.73311	4.81415	6.41688	2.99703	6.10521	4.77243	4.60953	3.8419	5.11023	4.41459	2.49661	0.337922	0.561941	0.215466	0.0407983	0	0	0	0	0
Unigene0001892	308	0.141639	0.12447	0.316721	0.13403	0	0	0	0	0	0	0	0	0	0	0	0	0	0	0	0	0	0	0
Unigene0001893	314	0.277864	0	0	0.262938	0.288714	0.811838	0.192219	0	0	0	0	0	0	0	0	0	0	0	0	0	0	0	0
Unigene0001894	632	1.10442	0.667254	1.31199	0.391911	0.717216	1.21005	0.382005	1.52643	1.33826	1.00191	0.829086	0.774254	0.859958	0.286399	0	0	0	0	0	0	0	0	0
Unigene0001895	319	0	0.120178	0	0.129409	0.284188	0	0	0	0	0	0.0864515	0	0	0	0	0	0	0.0927234	0	0	0	0	0
Unigene0001896	402	0	0	0	0.410759	0.338269	0.792653	0	0	0.478167	0.35003	0.480214	0	0.300439	0	0	0	0.0777177	0	gag/pol polyprotein [Pisum sativum]	0	0	GO:0004175//endopeptidase activity;GO:0003676//nucleic acid binding;GO:0016891//endoribonuclease activity, producing 5'0phosphomonoesters;GO:0034061	GO:0006260//DNA replication;GO:0019538//protein metabolic process
Unigene0001897	1903	5.36426	6.54727	4.40846	9.65328	9.57534	10.0132	6.56535	5.51667	5.63639	7.56059	11.0428	9.84461	9.36128	6.97512	4.94732	9.03446	8.81621	13.3361	Violaxanthin de0epoxidase [Medicago truncatula]	0	GO:0009536//plastid	GO:0016491//oxidoreductase activity	GO:0006694//steroid biosynthetic process
Unigene0001898	230	0.379345	0.833408	0	0.179484	0.197078	1.93959	0.787262	0	0	0	0	0.911793	0	0.52465	0	0	0	0	0	0	0	0	0
Unigene0001899	1803	8.10553	9.92972	7.0065	4.78525	0.578228	1.80266	2.3433	9.75685	9.33929	6.92634	5.46054	1.39576	2.07658	2.77748	9.39521	10.6653	8.75068	6.98866	LATHYROIDES [Pisum sativum]	0	0	0	0
Unigene0001900	880	10.7575	10.804	9.97671	5.20708	1.54527	2.10017	1.37175	16.6372	14.5915	15.3904	6.80049	1.90648	1.7842	2.87962	10.6588	15.3241	10.3668	6.588	WUSCHEL0related homeobox [Medicago truncatula]	0	0	GO:0003677//DNA binding	GO:0009987//cellular process;GO:0044699
Unigene0001901	250	0.523496	0.153347	0.1951	0	0.181312	0.509834	0.482854	0	0	0	0	0.279616	0	0.241339	0	0.651851	0	0.118315	PREDICTED: probable galactose010phosphate uridyltransferase0like [Cicer arietinum]	0	0	0	0
Unigene0001902	257	0.509238	0.745852	1.89786	0.481883	0.881868	1.98379	0.704554	1.54564	0.59836	0.958156	0.42923	0.816001	0.469947	1.17383	1.6342	0.634097	0.486265	0.575462	0	0	0	0	0
Unigene0001903	257	0	0	0	0.963766	0	0.991896	0.469703	0.883223	0.74795	0.273759	0.965768	0	0.469947	0	0	0	0	0	0	0	0	0	0
Unigene0001904	238	0.549891	0	1.22962	1.04071	0.571362	1.87439	0.7608	0.238433	0.80766	1.03465	0.811119	1.17486	1.77612	0.253508	0	0	0	0	0	0	0	0	0
Unigene0001905	1590	0.0548738	0.0482224	0.0613522	0	0.0570164	0	0	0	0	0.0442491	0.0346893	0	0	0.0758928	0	0	0.0392988	0	hypothetical protein MTR_1g099760 [Medicago truncatula]	0	0	0	0
Unigene0001906	2040	0.876771	0.845664	1.0281	1.21416	0.511051	1.78067	0.325453	1.19614	0.829197	0.862206	0.662413	1.3364	1.56891	0.591518	1.30389	1.63762	0.796378	0.623474	hypothetical protein MTR_1g099760 [Medicago truncatula]	0	0	0	0
Unigene0001907	1154	0	0	0	0.429269	0	0	0	0	0	0.121934	0.167284	0.121151	0	0	0	0	0	0.102526	PREDICTED: NAC domain0containing protein 180like [Cicer arietinum]	0	0	0	0
Unigene0001908	1277	0	0	0.07639	8.82522	0.212974	0.0998109	0.756232	0	0.0301054	0.495853	7.66656	0	0.189156	0.472473	0	0.0638069	0.66057	8.13011	PREDICTED: NAC domain0containing protein 180like [Cicer arietinum]	0	0	0	0
Unigene0001909	1575	4.54251	4.84382	4.39749	5.50418	5.20913	3.7226	7.35778	4.35962	4.66217	4.42238	3.81715	2.52986	3.33573	3.67755	4.19989	5.6649	5.13766	4.33822	PREDICTED: U0box domain0containing protein 270like [Cicer arietinum]	0	GO:0043234//protein complex	GO:0019787//small conjugating protein ligase activity	GO:0032446//protein modification by small protein conjugation
Unigene0001910	261	0.334289	0	0.186877	0.316332	0.173671	0.732521	0.462504	0	0.147297	0	0	0	0.462745	0	0	0.156095	0	0.226657	0	0	0	0	0
Unigene0001911	267	0.816942	0	0.182678	0.154612	0.169768	0.954746	0.904222	0	0.287975	0	0.309865	0	0.452346	0	0.131083	0.457761	0.117013	0.221564	0	0	0	0	0
Unigene0001912	366	0.35758	0.418981	0.133265	0.338372	0.247694	0.348247	0	0.310093	0.10504	0.288344	0	0.190995	1.15497	0.164849	0.191252	0.33394	0	0.161633	0	0	0	0	0
Unigene0001913	317	0	0.725617	0.153864	0.26045	1.28692	1.80935	0.7616	0.358026	0.242553	0.221943	0	0	0.190499	0.380661	0	0	0.0985569	0	PREDICTED: uncharacterized protein LOC100777167 [Glycine max]	0	0	0	0
Unigene0001914	1867	1.7992	2.66941	4.04934	5.04132	2.50069	2.28702	3.29748	1.85408	1.68852	3.27851	3.35309	3.10768	2.55526	3.07006	1.18101	2.66222	2.72766	3.43792	DNAse I0like superfamily protein [Theobroma cacao]	0	0	0	0
Unigene0001915	1010	0	0.0759144	0.289753	0.367853	0.224396	0.441688	0.239037	0	0.114192	0.0696594	0.10922	0.138424	0.0597903	0.0597374	0	0.0806747	0	0.14643	DNAse I0like superfamily protein [Theobroma cacao]	0	GO:0043231//intracellular membrane0bounded organelle	GO:0003824//catalytic activity	0
Unigene0001916	318	0	0	0.306761	0.649077	0.285082	0.400813	0	0	0	0	0	0	0	0	0	0	0	0	IMP dehydrogenase/GMP reductase, related [Medicago truncatula]	0	0	0	0
Unigene0001917	263	0.49762	0.437302	0	0.313926	0	0.72695	0.68848	0.431537	0.292354	0.267513	0	0	0.688839	0.45882	0.266153	0.154908	0.237586	0.224934	0	0	0	0	0
Unigene0001918	1200	4.10799	3.035	3.69877	5.64178	4.26839	5.68253	3.6717	4.20874	4.54928	4.98355	4.3895	3.26219	5.18332	4.17316	3.87907	4.75308	5.7278	4.48611	Palmitoyltransferase ZDHHC17 [Medicago truncatula]	0	0	GO:0046872//metal ion binding	0
Unigene0001919	991	5.28251	8.23989	7.97331	4.20728	3.61343	8.68159	1.279	11.8533	11.7545	7.59646	5.81615	6.27797	7.4952	1.09589	9.11177	12.1688	11.4756	7.87971	0	0	0	0	0
Unigene0001920	297	0.440654	0.12908	0.164226	0.277989	0.915718	1.07288	0	0.191068	0	0.473778	0.649987	0	1.42329	0	0	0	0	0	0	0	0	0	0
Unigene0001921	1534	6.48398	5.4981	2.57547	4.65559	4.1664	2.86657	10.8202	4.06922	2.58135	7.29244	8.82713	4.46584	2.75565	9.51827	1.91651	1.91221	3.50307	6.55592	PREDICTED: synaptotagmin020like [Cicer arietinum]	0	GO:0016020//membrane;GO:0043231//intracellular membrane0bounded organelle	0	GO:0015031//protein transport
Unigene0001922	1698	0.102767	0.0903104	0.05745	0.0486235	0.10678	0	0	0.0668399	0	0.0414346	0	0	0	0.0355329	0.0412239	0	0.0551988	0	PREDICTED: probable leucine0rich repeat receptor0like serine/threonine0protein kinase At3g148400like isoform X1 [Cicer arietinum]	0	0	GO:0036094;GO:0004672//protein kinase activity;GO:1901363;GO:0097159	0
Unigene0001923	1604	0.489554	0.382412	0.486534	0.463257	0.508669	0.238389	0.564434	0.353785	0.143808	0.570217	0.206319	0.0871622	0.225891	0.526613	0.327298	0.558788	0.428514	0.368812	PREDICTED: probable leucine0rich repeat receptor0like serine/threonine0protein kinase At3g148400like isoform X1 [Cicer arietinum]	0	0	GO:0036094;GO:0004672//protein kinase activity;GO:1901363;GO:0097159	0
Unigene0001924	1268	0.309639	0.483745	0.461593	0.5209	1.25117	1.05545	1.666	0.0895065	0.606382	0.582601	0.456734	1.15772	2.57174	1.23715	0.276018	0.192779	0.0985569	0.256598	Integrase core domain containing protein [Solanum demissum]	0	0	0	0
Unigene0001925	361	0.241688	0.318588	0.135111	1.37223	1.50675	0.706142	1.17035	0	0	0	0	0	0	0	0.193901	0.451421	0	0	0	0	0	0	0
Unigene0001926	549	0.0794621	0	0.444217	1.72945	0	0	0	1.4471	3.01114	5.31835	16.8281	0.25466	0.65998	0.219799	0.573756	2.30048	5.23554	16.3788	Subtilisin0like protease [Medicago truncatula]	0	GO:0030312//external encapsulating structure	GO:0004175//endopeptidase activity;GO:0005515//protein binding	GO:0010101;GO:0009725//response to hormone stimulus;GO:0044092//negative regulation of molecular function;GO:0019538//protein metabolic process;GO:0019758
Unigene0001927	2619	0.433082	0.49769	4.63726	16.6292	0.0519221	0	0.576143	0.888366	1.13029	5.89658	9.66653	0.186838	0.29975	1.05972	0.240544	0.777791	4.52116	6.91188	Primary amine oxidase [Medicago truncatula]	0	GO:0043231//intracellular membrane0bounded organelle	GO:0046914//transition metal ion binding;GO:0048037//cofactor binding;GO:0016641//oxidoreductase activity, acting on the CH0NH2 group of donors, oxygen as acceptor	GO:1901564;GO:0044710
Unigene0001928	674	0.906151	0.853193	0.868398	0.306241	0.336261	0.756431	0.1791	0.0841945	0	0.313157	0.204585	0.207431	0.627177	0.626623	0.155782	0.483569	0.185416	0.131656	0	0	0	0	0
Unigene0001929	269	0.486521	0.142516	0.906599	0.306924	0	0	0.448749	0	0.42875	0	0.205041	0	0.448983	0.224293	0.130108	0.302905	0.116143	0.219916	0	0	0	0	0
Unigene0001930	252	0.346228	0.15213	0.774207	0	0	0	0.239511	0	0	0.139595	0.437746	0.277397	0	0	0	0.161669	0.123978	0.117376	PREDICTED: probable glycerophosphoryl diester phosphodiesterase 30like [Glycine max]	0	GO:0031224//intrinsic to membrane;GO:0043231//intracellular membrane0bounded organelle;GO:0005576//extracellular region	GO:0008081//phosphoric diester hydrolase activity	GO:0019400;GO:0006928//cellular component movement;GO:0000904//cell morphogenesis involved in differentiation
Unigene0001931	269	0	0.285032	0.18132	0	0.505517	1.42147	0	0.421912	0.285834	0	0	0	0.224491	0	0	0.151452	0.116143	0	0	0	0	0	0
Unigene0001932	579	5.50018	5.76045	6.57073	4.13526	3.5229	3.85238	5.3164	5.09646	4.18309	6.25792	4.95357	4.22564	3.9633	3.43877	6.70967	6.12166	4.42468	4.18905	0	0	0	0	0
Unigene0001933	295	0.14788	0	1.15737	0.559747	0	0	0	0.384726	0.390962	0.238495	0.280455	0	0.409411	0	0.237282	0.414312	0.317721	0	0	0	0	0	0
Unigene0001934	1215	4.70357	4.32275	6.90478	5.16441	4.51415	6.55651	3.07993	7.05252	7.30922	7.29618	6.85479	4.43014	3.67796	4.56856	5.47311	6.23685	6.73707	5.40451	PREDICTED: general transcription factor 3C polypeptide 60like [Cicer arietinum]	0	0	0	0
Unigene0001935	427	0.306497	0.628472	0.79959	0.483388	0.212309	0.746245	0.706754	0.132897	0.270103	0.0823841	0.129171	0	0.141424	0.565197	0.0819651	0.858704	0.146335	0.0692711	0	0	0	0	0
Unigene0001936	693	1.19606	0.77448	1.54841	1.90621	7.12952	7.54084	6.35793	2.12904	2.16355	0.913714	1.43262	3.63138	3.92131	3.74372	2.22216	2.41035	2.29923	3.37189	0	0	0	0	0
Unigene0001937	255	0	0.300681	0	1.13321	0	0.249919	1.42016	0	0	0	0	0	0	0	0	0	0	0	0	0	0	0	0
Unigene0001938	485	2.0688	1.50185	1.40794	0.936277	0.841139	1.31401	0.124447	1.40405	1.50608	1.88583	1.649	1.72959	1.24512	0.74641	0.360815	0.756013	1.0951	0.85382	0	0	0	0	0
Unigene0001939	227	0.768717	0.168885	0	0.727424	0.798732	0.561492	1.06356	0	0.338719	0.309938	0.364467	0	1.33014	0.531584	1.23345	0.717898	0.825794	0.260606	0	0	0	0	0
Unigene0001940	881	2.72345	3.26363	4.15224	5.90403	9.05531	7.81244	1.98677	3.86473	5.01831	3.31416	3.85028	3.57058	1.50799	1.57514	5.16445	10.0811	8.26278	6.88269	Pectinesterase inhibitor [Medicago truncatula]	0	0	GO:0030234//enzyme regulator activity;GO:0052689	GO:0044092//negative regulation of molecular function
Unigene0001941	451	5.32009	5.27025	6.59706	7.04803	3.01517	5.36965	4.95167	6.79455	6.1375	5.928	5.99257	3.87495	4.95424	2.94316	4.50099	4.33604	4.7799	3.476	PREDICTED: E3 ubiquitin0protein ligase RGLG20like [Cicer arietinum]	0	0	GO:0046914//transition metal ion binding;GO:0003824//catalytic activity	GO:0050896//response to stimulus;GO:0071704;GO:0044237//cellular metabolic process
Unigene0001942	343	0.381557	0.558845	0.284402	0.722122	0.264303	0.371599	1.23177	0.165443	0.560417	0.410239	0.160805	0	0.352118	0.703613	0	0.118778	0	0	0	0	0	0	0
Unigene0001943	264	0	0	0.923769	0.625475	0	0	0	0	0.436871	0.2665	0.313387	0	0	0	0	0	0.355029	0	PREDICTED: cyclin0J180like [Cicer arietinum]	0	GO:0043231//intracellular membrane0bounded organelle	0	GO:0007049//cell cycle
Unigene0001944	246	0	0	1.18963	0	0	0	0	0.461359	0.156279	0	0	0	0	0	0	0	0	0	PREDICTED: cyclin0J180like [Cicer arietinum]	0	GO:0043231//intracellular membrane0bounded organelle	0	GO:0007049//cell cycle
Unigene0001945	1506	4.46096	5.6767	10.1372	7.23657	4.93612	5.83974	4.36845	8.13903	8.90914	10.7449	8.73487	5.75572	8.01968	9.49492	6.55361	7.84516	7.77952	7.34559	Agenet domain0containing protein [Arabidopsis thaliana]	0	0	0	0
Unigene0001946	2926	1.53566	1.70327	1.91699	3.13208	8.00909	6.51232	8.04482	1.66789	2.03654	1.80338	2.771	3.63138	4.396	6.28917	1.63871	1.86577	2.39177	2.82039	PREDICTED: U0box domain0containing protein 180like [Cicer arietinum]	0	0	0	0
Unigene0001947	268	2.93002	2.14572	2.72994	2.92666	5.4123	7.84726	6.30593	1.27046	0.8607	1.57513	1.74935	3.13003	1.80263	2.02617	1.56712	1.36816	0.466306	0.993317	0	0	0	0	0
Unigene0001948	365	0	0	0	0	0.745118	0	0.330722	0.155472	0	0	0	0	0.330894	0	0	0	0.171192	0	0	0	0	0	0
Unigene0001949	431	0	0	0.113167	0.191561	0.525847	0.591455	0.560156	0	0	0	0	0.324381	0	0	0.0812044	0.189052	0.144977	0.137256	0	0	0	0	0
Unigene0001950	401	1.0879	1.14724	1.21633	10.2946	2.48682	4.9267	2.10722	1.83968	2.10918	5.00036	33.9052	0.697298	1.95772	2.85876	0.174559	0.406391	3.11646	16.8178	0	0	0	0	0
Unigene0001951	540	0	0.141988	0	0.458681	0.167882	0.472069	0	0	0	0	0	0	0	0	0	0	0	0.0547755	Chaperonin0like RbcX protein isoform 1 [Theobroma cacao]	0	GO:0009532//plastid stroma	GO:0005515//protein binding	GO:0006457//protein folding
Unigene0001952	1199	1.96475	4.76412	5.20701	7.78113	3.1378	2.76391	1.4095	0.520616	0.73747	0.52811	1.63306	0.641322	1.10804	0.201284	1.05085	0.339789	0.807772	1.99823	Chaperonin0like RbcX protein isoform 1 [Theobroma cacao]	0	0	0	0
Unigene0001953	857	0	0.134201	0	25.4817	0	0	0	0.132432	0	3.03754	64.2951	0	0	0	0	0	4.4476	36.6887	PREDICTED: LOB domain0containing protein 20like [Cicer arietinum]	0	0	0	0
Unigene0001954	1517	0.143786	0.505429	0.803807	0.54425	0.358561	0.0840202	0.0795739	0.635927	0.506851	0.417405	1.01804	0.184322	0.517499	0.676132	0.115356	0.590834	0.844393	0.487455	Abscisic acid 8'0hydroxylase [Medicago truncatula]	ko00906//Carotenoid biosynthesis	0	GO:0046914//transition metal ion binding;GO:0016491//oxidoreductase activity;GO:0046906//tetrapyrrole binding	GO:0044710
Unigene0001955	1812	0.192604	0.126943	0.269178	0.182258	0.0500309	0.0703414	0.0333095	0.313174	0.0212167	0.330036	0.304393	0.154314	0.199961	0.133189	0.193152	0.179871	0.327598	0.359124	Abscisic acid 8'0hydroxylase [Medicago truncatula]	ko00906//Carotenoid biosynthesis	0	GO:0046914//transition metal ion binding;GO:0016491//oxidoreductase activity;GO:0046906//tetrapyrrole binding	GO:0044710
Unigene0001956	361	4.59207	4.77882	7.83643	3.88799	1.88344	3.17764	3.67825	1.57194	2.34288	2.24126	2.21541	3.67916	3.68017	5.1811	2.71461	2.82138	1.81743	1.72065	Peroxisome biogenesis factor [Medicago truncatula]	ko04146//Peroxisome	GO:0016020//membrane;GO:0044439	GO:0032550;GO:0003676//nucleic acid binding;GO:0016887//ATPase activity	GO:0009062//fatty acid catabolic process;GO:0009154;GO:0006625//protein targeting to peroxisome
Unigene0001957	750	2.15215	2.55579	3.25167	3.74284	5.0163	2.88906	4.82854	0	0	0.046904	0	0	0	0	1.25997	1.73827	2.37443	2.05079	0	0	0	0	0
Unigene0001958	1311	0.0332759	0	0.0744089	0	0.0691503	0.0972224	0.322271	0	0.0293246	0.160998	0	0.106642	0.0460627	0.0920439	0	0.0932282	0.0476621	0.045124	Cytochrome P450 [Medicago truncatula]	0	0	0	0
Unigene0001959	1824	0.980599	1.36617	1.39052	1.51636	0.695825	1.43251	0.694897	1.27557	1.64401	2.27577	1.84458	1.91623	1.05944	1.29005	1.88043	2.16658	2.34662	2.01084	Cytochrome P450 [Medicago truncatula]	0	0	GO:0046914//transition metal ion binding;GO:0016634;GO:0046906//tetrapyrrole binding	GO:0044710
Unigene0001960	1093	0.239477	0.245524	1.2495	0.793145	1.32708	1.7492	1.21487	1.03837	1.61798	0.643696	0.782176	2.17451	2.04425	1.71123	0.256169	0.596387	0.657437	0.568302	PREDICTED: ASC10like protein0like [Glycine max]	0	GO:0031224//intrinsic to membrane;GO:0043231//intracellular membrane0bounded organelle	0	0
Unigene0001961	271	2.7366	6.79028	11.6988	7.00716	3.34524	5.1736	6.01341	8.16656	4.39772	5.71156	4.07056	5.41692	6.46221	5.56594	2.45381	8.11808	7.03245	4.47502	PREDICTED: ASC10like protein0like isoform X2 [Cicer arietinum]	0	GO:0031224//intrinsic to membrane;GO:0031090//organelle membrane;GO:0043231//intracellular membrane0bounded organelle	0	GO:0044238//primary metabolic process
Unigene0001962	336	0.259671	0.228195	0.435491	0.122861	0.539619	0.379341	0.359267	0	0	0	0	0	0	0	0	0.485008	0.557902	0.264096	0	0	0	0	0
Unigene0001963	530	0	0	0	1.01256	0	0	0	0	0	0	0	0	0	0	0	0	0	0	0	0	0	0	0
Unigene0001964	695	0	0	0.14036	0.950361	0	0	0	0	0	0	0	0	0	0	0	0.117239	0.0899066	0.127678	0	0	0	0	0
Unigene0001965	310	0	0.371001	0.314678	0	0.731097	0.411157	0.778797	0.549166	0	0.113477	0.177923	0.901988	0	0.973142	0	0.525687	0.201565	0.0954154	0	0	0	0	0
Unigene0001966	900	0.436247	0.511157	1.13808	6.88022	0.604374	0.141621	0.402379	0.378314	0.427162	1.95433	5.76074	1.0874	0.67098	1.60893	0.0777758	0.679012	0.79842	7.52615	Os09g0460100 [Oryza sativa Japonica Group]	0	GO:0043231//intracellular membrane0bounded organelle	0	GO:0070646//protein modification by small protein removal;GO:0045491;GO:0044085
Unigene0001967	912	0.191336	0	0	1.17688	0	0	0.132361	0.0622227	0.168617	0.154289	0.997889	0.0766492	0	0.0661566	0.0767524	0	0	1.10272	Os09g0460100 [Oryza sativa Japonica Group]	0	GO:0043231//intracellular membrane0bounded organelle	0	GO:0070646//protein modification by small protein removal;GO:0045491;GO:0044085
Unigene0001968	270	0	0.283976	0	0.305788	0.671526	0.472069	0	0	0	0.130289	0.612845	0	0	0	0	0	0	0.547755	Beta0glucosidase [Medicago truncatula]	0	0	GO:0004553//hydrolase activity, hydrolyzing O0glycosyl compounds	GO:0044238//primary metabolic process
Unigene0001969	464	0.0940187	0.660979	0.420474	1.06762	0.195379	0.412043	0	0.489199	0.828548	0.454888	0.950967	0	0.390441	0	0.452574	0.175607	0.201999	0.509979	Beta0glucosidase [Medicago truncatula]	ko00500//Starch and sucrose metabolism;ko00940//Phenylpropanoid biosynthesis;ko00460//Cyanoamino acid metabolism	GO:0043231//intracellular membrane0bounded organelle	GO:0015926//glucosidase activity	GO:0044238//primary metabolic process
Unigene0001970	385	0.226622	0.298728	0.253377	0	0.824146	0.165531	0.156771	0.29479	0.798849	0.274114	0.143262	0.181569	0	0	0.0909067	0.10582	0.486897	0.153656	Transport membrane protein [Medicago truncatula]	0	0	0	0
Unigene0001971	1449	5.3289	4.97399	4.88087	7.54972	4.00413	4.5301	5.04015	4.34709	3.79405	4.05433	4.73908	3.61822	3.75082	4.16389	4.63756	3.85195	4.93757	6.06273	STAM0binding protein [Medicago truncatula]	ko04144//Endocytosis	0	0	0
Unigene0001972	729	0.538577	0.631058	7.15902	10.3062	0.37307	0.26226	7.78263	1.16764	2.10944	10.2783	12.9757	0	0.414185	4.22095	1.34427	4.6944	17.8284	16.9601	Aquaporin PIP201 [Medicago truncatula]	0	0	0	0
Unigene0001973	351	0.248574	0.218443	0.27792	0	1.03312	0.36313	0.343913	0.485018	0.219058	0	0.0785699	0.199157	0	0.171894	0.39885	0	0	0	0	0	0	0	0
Unigene0001974	631	0.207407	0.425289	0.154596	0.588799	0.574682	0.201995	0.38261	0.44966	0.487412	0.668995	0.349642	0	0.191405	0.191236	0.110932	0.645653	0.643666	0.93752	0	0	0	0	0
Unigene0001975	535	2.12008	0.931548	2.18804	1.0031	2.03341	2.26328	1.69225	1.48497	1.43718	1.77534	1.80417	1.82927	1.3545	0.902203	1.57005	1.67532	2.33589	0.884598	0	0	0	0	0
Unigene0001976	244	0.35758	0.157118	0.199898	0.169186	0	0	0.247364	0.23257	0.15756	0.144172	0.113025	0.286492	0	0	0.143439	0.16697	0	0.121224	0	0	0	0	0
Unigene0001977	1306	3.27352	2.28964	4.07081	5.05744	5.83086	4.83093	3.83584	3.56299	3.76793	3.4747	3.12523	4.54965	3.56041	4.66601	2.1171	4.02416	3.92326	3.5105	PREDICTED: dual specificity protein phosphatase 80like isoform X1 [Setaria italica]	0	GO:0009536//plastid	0	0
Unigene0001978	221	0.394794	0.520409	0.220701	0.186793	0	0.288368	0.273108	0	0	0	0	0	0	0	0	0.368694	0	0	0	0	0	0	0
Unigene0001979	206	0.21177	0.186101	0.236772	0.40079	0	0	0.292994	0	0	0.683068	0	0	0.293147	0	0.169898	0.593311	0	0	0	0	0	0	0
Unigene0001980	427	6.2321	5.74603	8.68127	5.22059	6.05081	5.07446	6.07808	6.77776	7.20274	10.0509	7.29817	6.7121	4.667	5.65197	4.75397	6.20175	7.46309	7.06565	0	0	0	0	0
Unigene0001981	1899	1.67699	2.36198	6.65231	8.49974	4.3681	3.5573	4.83109	4.51228	5.34459	8.66946	10.9499	3.3498	3.3072	3.81263	3.77821	5.02018	6.64665	9.76613	PREDICTED: SRSF protein kinase 10like [Cicer arietinum]	0	GO:0043231//intracellular membrane0bounded organelle	GO:0004672//protein kinase activity;GO:0032550	GO:0006796//phosphate0containing compound metabolic process;GO:0006464//protein modification process
Unigene0001982	254	0	0.150932	1.34419	1.3002	0	0	0	0	0	0.138496	0.65145	0	0	0	0.275583	0.48119	0.615011	0	MADS0box protein AGL160II [Medicago truncatula]	0	GO:0043231//intracellular membrane0bounded organelle	GO:0005515//protein binding;GO:0001071//nucleic acid binding transcription factor activity;GO:0003676//nucleic acid binding;GO:0016628//oxidoreductase activity, acting on the CH0CH group of donors, NAD or NADP as acceptor	GO:0009653//anatomical structure morphogenesis;GO:0006351//transcription, DNA0dependent;GO:0048364//root development;GO:0045491;GO:0009913//epidermal cell differentiation;GO:0048468//cell development;GO:0006996//organelle organization;GO:0044085;GO:0044710;GO:0010167//response to nitrate;GO:0071555
Unigene0001983	1259	6.79145	8.03885	4.72641	12.6893	2.62823	0.759285	5.94459	13.2515	10.0158	9.50002	18.6847	5.88549	4.65263	9.34495	12.871	9.6108	15.2366	12.8981	PREDICTED: LOB domain0containing protein 370like [Cicer arietinum]	0	0	0	GO:0008152//metabolic process;GO:0009965//leaf morphogenesis
Unigene0001984	1640	3.99006	6.3583	6.78092	10.3203	7.13087	2.44814	7.91263	4.01382	4.89934	5.46975	7.85301	5.83955	3.27716	4.89301	4.86573	5.96206	10.0205	10.6592	Octicosapeptide/Phox/Bem1p family protein [Arabidopsis thaliana]	0	GO:0043231//intracellular membrane0bounded organelle	GO:0004672//protein kinase activity	GO:0006468//protein phosphorylation;GO:0048588//developmental cell growth
Unigene0001985	893	0.683926	0.643955	1.36548	0.924554	0.609111	1.07048	1.41936	0.826106	0.430511	1.49694	0.926474	1.09592	1.55535	0.608078	0.783854	0.729957	1.22451	0.662458	0	0	0	0	0
Unigene0001986	1077	0.405058	0.284767	0.407591	0.421629	0.925921	0.532557	0.392291	0.31614	0.428352	0.359293	0.102425	0.324532	0.841061	0.560212	0.292471	0.302624	0.319097	0.357032	0	0	0	0	0
Unigene0001987	475	0.367366	0.161418	0.102684	0.521448	0.0954274	0.536668	0.254134	0.47787	0.080936	0.148118	0.58059	0.147167	0.254266	0.254041	0	0	0.197321	0.747253	0	0	0	0	0
Unigene0001988	481	0	0	0	3.34713	0	0	0	0	0	0	5.56147	0	0	0	0	0	0.324766	7.37932	LCR related CCP [Medicago truncatula]	0	0	0	0
Unigene0001989	661	0.65998	0.173994	0.442738	0.124906	0.891474	1.25337	0.639179	0.515102	0.46529	0	0.333773	0.105755	0.639512	0.273834	0.211795	0.184905	0.330859	0.089497	0	0	0	0	0
Unigene0001990	304	0	0.252216	0.160444	0.135794	0.745527	0.419272	0.595626	0	0	0	0	0	0	0	0	0	0	0	PREDICTED: protein NYNRIN0like, partial [Cicer arietinum]	0	0	GO:0003676//nucleic acid binding;GO:0016891//endoribonuclease activity, producing 5'0phosphomonoesters;GO:0034061	GO:0006260//DNA replication
Unigene0001991	552	0	0	0.530163	0.14957	0	0	0	0	0.069646	0.0637283	0	0	0	0	0	0	0	0	0	0	0	0	0
Unigene0001992	821	0	0	9.03021	3.82141	0	0	0	0	0.0468266	0.899803	0.604634	0	0	0	0	0	0.0761085	0.216166	0	0	0	0	0
Unigene0001993	220	0.396588	0	0.443409	0.562927	0.412073	0	0.274349	0.515883	0	0.3198	0	1.58873	0.823475	0.274249	0.318174	0.74074	0.142012	0.268898	0	0	0	0	0
Unigene0001994	229	0.571503	1.17187	0.212991	0.360536	0	1.66976	1.5814	0.495608	0	0.460847	0.120428	0	0	0.263471	0.458503	0.355814	0.13643	0	0	0	0	0	0
Unigene0001995	802	5.16751	8.26966	4.86534	2.72807	4.35194	7.86683	3.46186	0.212271	0.0479359	0.30704	0.137546	0	0.527079	0.225691	7.41876	4.4703	4.86947	3.76189	0	0	0	0	0
Unigene0001996	392	0.111287	0.586788	0.746556	0.421238	0.346898	1.62575	0.153971	0.868578	0.588438	0.358959	0.140704	0.356654	0.154052	0.461746	1.24997	0.831443	0.159401	0.37728	0	0	0	0	0
Unigene0001997	380	1.60723	1.71507	1.66862	1.08635	0.477137	2.18021	0.317667	0	0	0	0	0	0	0	0.184206	0.107212	0.246652	0.389194	0	0	0	0	0
Unigene0001998	267	0.326777	1.29225	0.548034	0.154612	0.339536	0.238686	0	0	0	0.263506	0.103288	0	0.226173	0.225973	0.131083	0.305174	0	0	0	0	0	0	0
Unigene0001999	290	0	0.925371	0.840949	0.854096	0.156304	0	0.624381	0	0.53027	0.121303	0	0	0.208235	0	0.241373	1.12388	0.107733	0.305987	0	0	0	0	0
[truncated: 85,138 more rows]
