# Supplementary material for: High-Throughput RNA-Seq Data Analysis of the Single Nucleotide Polymorphisms (SNPs) and Zygomorphic Flower Development in Pea (Pisum sativum L.)
Source: Int J Mol Sci. 2017 Dec 20;18(12):2710. doi: 10.3390/ijms18122710 (PMC5751311; doi:10.3390/ijms18122710)
Supplement: Supplementary file 1 [file ijms-18-02710-s001.zip › Table S2.xlsx]

## Sheet: All SNPs
UniGene	Loc	Rbase(JI2822)	JI992	Terese	sequence
Unigene0001337	631	G	-	A	AACAAGCTTTAGAGATTAACTTGGCAGCATTGTTTGTGGCTTCTTCGTTGCCTTTAAGGAATCCATCAAGGTCTATCAATGGTGCTTGAAACTCTTCATTTGCGTTTACTAGATACTCTTTTGGCCAAACGAAGTTGGTTGGAACCTTAC(A/G)TTGTTTTTGTAACCAAGATGGGTCGTAGAAATGGTTTTGATGAAGTATTTCTTGGTGGTTACTAGACACTAAGCAGAGACCGGAATCCATGACACAAACGTTAATAATTGTTGTTTGATGAAATTAAGGAATGAGGAAGTTTATAATGAT
Unigene0001365	69	T	-	A	NNNNNNNNNNNNNNNNNNNNNNNNNNNNNNNNNNNNNNNNNNNNNNNNNNNNNNNNNNNNNNNNNNNNNNNNNNNNNNNNNNGGCGGAGCATCACTCTGGTGCGAGGGTTTGGGCTCTTGGTTGGGACTTTAGACTCTATGGTCCTCTCT(A/T)CACGGGAATAGTTACCTCAGGAATAACATATTATGTGCAAGGTTTGGTATTGCAAAGCAGAGGCCCAGTATTTTTCACTGCATTTAATCCTCTTTGTATGATCATCACTTGTGCTCTAGGCTCATTTCTTTTCGGAGAACAACTCCACTT
Unigene0001927	111	T	-	A	NNNNNNNNNNNNNNNNNNNNNNNNNNNNNNNNNNNNNNNNTTTCATTCCTCTTATTTAAGGTTTTATTTCTTCTCACTTGGAGAACTAACATGCTTCCATTAGACCAACTTCTGATTTCTTTATTTGGCATGTACATACCTGATGACACA(A/T)GTAAAACATTCTACATTTTTCACATCACAATCAAAAGTTAACCATTGCCATTACTAATTATTTAAAACTATGAGATAGAATCTCTCAAGCTGAATCTTGTGCCTTGCAAACAGGTAAATCCTCTTGGAAATTTGGCCGCATTCTCAGGAT
Unigene0001927	112	G	-	A	NNNNNNNNNNNNNNNNNNNNNNNNNNNNNNNNNNNNNNNTTTCATTCCTCTTATTTAAGGTTTTATTTCTTCTCACTTGGAGAACTAACATGCTTCCATTAGACCAACTTCTGATTTCTTTATTTGGCATGTACATACCTGATGACACAT(A/G)TAAAACATTCTACATTTTTCACATCACAATCAAAAGTTAACCATTGCCATTACTAATTATTTAAAACTATGAGATAGAATCTCTCAAGCTGAATCTTGTGCCTTGCAAACAGGTAAATCCTCTTGGAAATTTGGCCGCATTCTCAGGATC
Unigene0002379	285	G	-	A	AAGCATAAACTATGTATGTCATCTAGTGCAACCAGAGCATGTTTCTGATTCAACTTTCACACAGGGCATAAACATACATATTTGTTTCCTATATATATATATATATCTAATCAGGTTCATTGCCTTAGTCTACAGTCTTGCAGAAGACTC(A/G)AGATCCCAATCAATGTCTCCACAGTCGATGCCTCCACACGCCGTAAGAACTGTCGAAAGAATATAATCATCCACCACAAAACCTTCAGCTTGCATTCTATACATGAGCTTTAGAGCCTTGTTACAATGCCCATTTCTTGCATAACCCATG
Unigene0003145	56	G	-	A	NNNNNNNNNNNNNNNNNNNNNNNNNNNNNNNNNNNNNNNNNNNNNNNNNNNNNNNNNNNNNNNNNNNNNNNNNNNNNNNNNNNNNNNNNNNNNNNAAAATTCATAGTATGCTATTGAAGTGTATAAGTTCAAACATAAAGGGTCTGATTC(A/G)CAACTGGGAAGATTAATCTTTACGGTCAGACTGGACTAGATGAGTTCAAAAAATCAGATTTGAACTCGAGATAAGCTCGAAGAGACTTGTACAACCTCATACCATATTCTAAACCTAAATGAAGAGCTATAAGAAAACAAAACTTGTGCA
Unigene0003713	42	C	-	A	NNNNNNNNNNNNNNNNNNNNNNNNNNNNNNNNNNNNNNNNNNNNNNNNNNNNNNNNNNNNNNNNNNNNNNNNNNNNNNNNNNNNNNNNNNNNNNNNNNNNNNNNNNNNNTTTTGACAAATGAAGTGAATATATCACCATGAGCATAACTT(A/C)GAGTTCCCAAATGAGTACATTGAAGAACAAAGACAAGAAAAATTGGAAGCTAAGCTATACATTTGACCTATTCTGTGCTAGCACAAGTTCTCTCAATCACCTTTGAATCTGTTCTATGAGAGTTTCTAGATGGAGAACTTGTTTCTCTAG
Unigene0004221	72	G	-	A	NNNNNNNNNNNNNNNNNNNNNNNNNNNNNNNNNNNNNNNNNNNNNNNNNNNNNNNNNNNNNNNNNNNNNNNNNNNNNNNGATAAATCCTCGAAATTACGATTTTATCCCTTGAAACTTCATCTATTCTAGAGAGAGAAAAATCCCAAAAA(A/G)AACAAAAACAAGAAGAAAAGGAAAACTTGGTTGTGTGAACTGTCAAATGCTGGCGACTGATTTAAAACGCGGTGGCGCTGCCACGGCGGTTTAAGATCTTCAGTTACCCGAAACTATTTTCCACCACCGTAAATGGGTTCCGGTCATATT
Unigene0005431	78	C	-	A	NNNNNNNNNNNNNNNNNNNNNNNNNNNNNNNNNNNNNNNNNNNNNNNNNNNNNNNNNNNNNNNNNNNNNNNNNTTTTTGATTATTATATCATATTGGAATTAAACTTTATAAATGGAATACAGAGAAGATGGGAACAAGTATTTTCCCAG(A/C)CTAACAAGAACAAACAAGACAAACAAGCTTTTACCATTAAACAAATTGAAACACTGCATCATGTAACACACAGACAAATACTTTATGAAAATTGGGAGAAGAAAAAAATATTCCAAGTCTAAAAAATGGTAAAAGGTAACAGTTTTCAAG
Unigene0005524	21	G	-	A	NNNNNNNNNNNNNNNNNNNNNNNNNNNNNNNNNNNNNNNNNNNNNNNNNNNNNNNNNNNNNNNNNNNNNNNNNNNNNNNNNNNNNNNNNNNNNNNNNNNNNNNNNNNNNNNNNNNNNNNNNNNNNNNNNNGAAGAATGTAATTTTTATTC(A/G)ATTAACATGAACTAATATACAACCATTTTACAAACAAAGGAAATAACAAGCTCTGTATATTGAGTAGTAACACAGATAACAAACCCTATTTCTGCTAGGTCTTATTCTAACAAACTAATAAAATAGTAGACTAAAACAAAATAAGTGTCC
Unigene0006560	195	G	-	A	ACAGTTTCATAAACCGAATTGATGATTCACTAATCAATAGCTTATATGGTATTTGATAATTGACAACATGGAATAAATTTGATCAAACCACCTTTAGAATAAATTTGAACTCTCCCTAATTCACTAAAGTAAATAATCTATGTTGCTCAC(A/G)TTCTTACTGATACTGTTTTGCAGACTCAAACTAAGTAGCAGTGTTTTCCAAATAAATTGGTTAGGAATGATACCCTTCTCTACCATTTCCAAAAATACCTGCATGCCTTTCTGAAGGTCCCCTTTCCTGCATAACACGTCAATCAAAGGG
Unigene0006662	51	C	-	A	NNNNNNNNNNNNNNNNNNNNNNNNNNNNNNNNNNNNNNNNNNNNNNNNNNNNNNNNNNNNNNNNNNNNNNNNNNNNNNNNNNNNNNNNNNNNNNNNNNNNGTGGAATGTGCCAAAAATTAAGCACCTTCTGCATAAAATCAAACAGCTTA(A/C)AAAACTACTCAGCTTCAATGTTGTCTTTACACAAGAATTCACCCGATGGTATTTGAACTTTCACATGTAAGTTCGCCGCACTATCAAAAAGGTCAAAAACTTACAGTAACTTGCATCAGTTGTACTAAGTATACATAACCATAAACAGCC
Unigene0006913	156	T	-	A	TGTGTAATGGTTGGTGACTTGATGTATGTTCAAATATCTTAATGTTTTATAATACGAAGATGCTTTGTTGAAATGAAACTATATCCTAAACAAATAACTATTATTAAAAACATGTTATTAATACTTTGCAATACAATGGCTATGAATCAA(A/T)GTAGTTCATTGCTTTCATATCGGGGCTCGTTACAAAAGGAAAATTCCTCATTGACCAAAATGTATGGGCAATTTACTTAAAGTTGTTACCTCCTGCATTAAGCCTCTAACTGATAACCTCTACTAAGCCACTAATTTCACATGTTAGTAA
Unigene0006964	47	C	-	A	NNNNNNNNNNNNNNNNNNNNNNNNNNNNNNNNNNNNNNNNNNNNNNNNNNNNNNNNNNNNNNNNNNNNNNNNNNNNNNNNNNNNNNNNNNNNNNNNNNNNNNNNGTAAAAACCAAATTAAATATTTTATAAATCCAGGTTTTCTATGTTA(A/C)TCCAGGCATTTAAAGAAAAGTATAATAAAATACATTCTTTTATGTATCCAAAAGGAGTTTTCTCCATGGATACATACAGATCTAACAAAAAATATTTTATTAAGATGAGCATTGATGAGGTAAGGTGAGAAAGCAGGCAGTTTTCACGAT
Unigene0008145	178	G	-	A	AAATTTCAGGAATCAAACAGAGTACCGGACATTCTGAAAAGCACATACAGCTAGATTCTTCCGCAAGTACCGCATCATATTTTCATAATACTCGCTTTCTTTACAAAATTTACGAGCCAAACAATTATTCCATTGAAGTCTCTTCTTTAC(A/G)CAGTATTCAATTGTTCTTGAGATCCATTCTTCCTTGGAAGGAACCGTTTGTTGAAGTCGCCTTGGAAGATTCTCCCATTGACATTCATCCTTAATCGCTTTTTCCAACAACAGTTCCTCCACCGTCACCGGAGCACGCTGCATTTTTCAC
Unigene0008238	2212	C	-	A	GCACCAGTTACCTATCCTCTTATGTTTTTTTTTGCAAAATTGATAAATACTGTATTTTGGTTTTAAGCAGGTAAACTGACCAAGTGAAGTTTTTTCTCGTTTACTATTATGATTTAATGATGAGCATCTCACTCAAATAATTTTCAAATG(A/C)TAGTGTTTCTTTGAGAGAATTCTTTTACATAAGGTAGTATGTAGTTGGTATTTATGGTTTGATTTATTGTTGATGTGATGACTTGGTTAATAGATAATATGTAAATATTTTGGTAAGATTANNNNNNNNNNNNNNNNNNNNNNNNNNNNN
Unigene0009404	177	G	-	A	ATGACATAAGAACTTCCTCACAAAACACACATAATGCCTTTACCCTCTGCAACCACCATCATCAACATTAATCACTTGTTAAACCAATCCAATGCTATCTCTCACTCTCACCTCAAACAAATCCATGCTCAAATGCTTCGCACCATTCAC(A/G)CAAACCATCCACAATCCCTTTTTCTCTACACAAGACTTCTTCACCACTCCTCCTTCACAAATCTCAACTACACTGCTCGTGTTTTTCATCACTTCAACAATCCAAATTCCTTTATGTGGAACATTCTTATACGAGCCTACGCCAAATCCA
Unigene0013977	2059	G	-	A	AACCAAAAGAGAGACCCATAATTTGATTCTATGTTCCATGAAAGTGTTGGGAAGGAAATTGGTGTTTGTGACATAAAAAGTTAAGGATATGGCGCTGCTGTCACAACCACCACCAGTTCTTCATCTCCTTCGCAATGGTTGGAAAATTTT(A/G)CTACTCTTTTTTTTTCTTCCAAATATAAAATATATGATATAACAAAGTNNNNNNNNNNNNNNNNNNNNNNNNNNNNNNNNNNNNNNNNNNNNNNNNNNNNNNNNNNNNNNNNNNNNNNNNNNNNNNNNNNNNNNNNNNNNNNNNNNNNNN
Unigene0014300	104	G	-	A	NNNNNNNNNNNNNNNNNNNNNNNNNNNNNNNNNNNNNNNNNNNNNNNTTTGTCTTGTCTGCTGGTCACTGCAAAATGGGTATTTTGATATAAAACAATATAATATAAATTTCCACCATTATTCATCGTAGATATCCAATTTCAATGGCCA(A/G)CAAGAGTGAAGTGAAGCTTATTGGAAAATGGTCAAGTCCTTATGTGACAAGGGTGAAGATTGCCCTAAACATCAAATCGCTTGATTATGAAAACTTTGAAGAGAACGAAACTTTTAACCCCAAAAGCGATCTTCTTCTTCAATCCAACCC
Unigene0014391	85	G	-	A	NNNNNNNNNNNNNNNNNNNNNNNNNNNNNNNNNNNNNNNNNNNNNNNNNNNNNNNNNNNNNNNNNNCTACAAAATTCAATAAATATGGCAATTATAGTTTATAAGAAATATTAGCCATACATAAATAATATTTAAAATCTATCTAATTAT(A/G)AATCAATGCGACGCCTTTCTTTCTTAGACTTAACAATCTCCATCTTCAACATTTCAAGTAAGAAATCATTCCATGTATCAATCGGTCCAGGCAAACACCAATGGACACAATCGTTATACAAAGTCACATTCTCTCCCGGCAAATGTCCAT
Unigene0015757	621	G	-	A	GTTTGGGAATTTCAACTTAGTGTTAGTAATTATAGTTGTTGTATGTGAAAATATGTTGTTTGCTTGCGTTGCTGAATTTGTTAGTTTTACTACTTTGCTTGGTTTCCAATTTACTCAGTCAGTCTCACTTTTAGTTATTCCTATGAGGAT(A/G)TTATTGAACGTGACAGCATGGTTCTGTGTATAAACTGGCGTTTGGACCGAAAGCATTTGTTGTTGTATCAGATCCCATTGTTGCAAGACATATTCTGCGAGAAAATGCATTTTCTTATGACAAGGGAGTACTTGCTGATATCCTAGAACC
Unigene0018383	26	G	-	A	NNNNNNNNNNNNNNNNNNNNNNNNNNNNNNNNNNNNNNNNNNNNNNNNNNNNNNNNNNNNNNNNNNNNNNNNNNNNNNNNNNNNNNNNNNNNNNNNNNNNNNNNNNNNNNNNNNNNNNNNNNNNNCTCGTTTAATTAAACCGTGAAGTGC(A/G)TAGTATTAAAGAAAATGCAAGAACTGGGACATAAAGTTGAATCATTAAATCCAATCAACATTACATGACTTCCAAATCTTCATTTATCCCAACATAGTGACTCCTACCCTGTCCCTCCCCTCCCTTTTTTCTTTTAGTCCAGGCTCTGTT
Unigene0019293	255	G	-	A	CTCACTCACTCACTCACTCGTTCACACAGGTCTATTAAGTTTTGTTTTGTTCATTTTTTACAATAACCGATTCATCGAAGGTTTGCAGAATCATGTAGAGGTCTGCAGTGTATGGTATTGGGTGCTCTTCGGCTTGCAGTTTCCAATTGC(A/G)CTTTTGGTATTTGGCTTTGAAGCAGTCAAGTTGTACAAGGATCACAGAAAGAGGAAGGGCACAGGGAGCCTAGAATACATATGCGAGGCTTCAATAGAATGGAGTGTTACATCGCTTGCATTTTGTGCAATTTGTGGTATTGTAGGTGGA
Unigene0020412	76	G	-	A	NNNNNNNNNNNNNNNNNNNNNNNNNNNNNNNNNNNNNNNNNNNNNNNNNNNNNNNNNNNNNNNNNNNNNNNNNNNGTAACTAAGTTTATTATATACCGATTCAATACACAAACTACAAAATAATTTTGTTAAACAAAGGTATTACATAAT(A/G)ATATACCAAACAAAAACAATCACAAACACTCTTTTAAGTCTCTATAATTTAACAGAAATGGTTAAAATTTCAGCCTCAAGAGCTAGTTGGTCGATGGCACTGCTAAACCCGGCACAACAAAATGCGAGACACCTTCTGATAAATTCTTCA
Unigene0020503	1464	G	-	A	GAACCTGATCCTGATGATTCTTATCATGAACCTTTGCATTCTCAGACAGGTACAGTGAATATGGATGCAACTTATCCTGGTGCAAATGATTCAGAAACATCGTTAAAGTCTATTGCTCCAGCAATTGGTAAGTGTTCTCCAGAAATAGAT(A/G)TTTTAGATAGACACGTCGTCATTCATAAACTTCACAATAATGAATTGGTGGAAAAAATAAACAGTTCATAATAGTATGAGGCTGTCAGAGGAGCCCGCCTTGGAAATAAATAAAAGAAATGAAAATAATTCCATTGCTTGATTTAAAATA
Unigene0022392	27	T	-	A	NNNNNNNNNNNNNNNNNNNNNNNNNNNNNNNNNNNNNNNNNNNNNNNNNNNNNNNNNNNNNNNNNNNNNNNNNNNNNNNNNNNNNNNNNNNNNNNNNNNNNNNNNNNNNNNNNNNNNNNNNNNNTTTTATTCTAGTCTTACAGTTTTAGC(A/T)GTTGTCACTTGGCAAGTATTGATTGTGGCTATACCAATGGTTTACGTTACAATTCGCTTGCAGAAATACTACTTTACCTCAGCAAAAGAAGTGATGCGGATGAGTGGCACAACAAAATCCTGCTTAGCTAACCATGTAGCTGAAACTGTT
Unigene0022654	145	C	-	A	NNNNNNGAAACATTCAATGATCCCTAAAAGTCCAAAACGACGACCTGCAACGAAGCTGGAAACGTCGTTTTGTTCGTCCCTTTGCATGTTTCCTCTACTCTTCCCACTGGTGTCCACTGCTAGATGTAGAATTTCACTGTAATCGTAATC(A/C)GAAGCTAACCTCGCTCCCAAAATGTTTCACTCCGCAACTTTAACCGTTTTACTCCTAACTGGTTGTCGTTTCGTTATTTCCTTCTCCCTTTTCTCATTCGTATTAGTTACCAAAACGATTTGATCTTCGAAACCTTAATTTTCGATGTAT
Unigene0022964	89	G	-	A	NNNNNNNNNNNNNNNNNNNNNNNNNNNNNNNNNNNNNNNNNNNNNNNNNNNNNNNNNNNNNNCAAAGACTAGTATAGACCCAAAAATTCAGACTCAAACTATCTTAGAGCGCAAGCAGCAAAGCACCGCACGTTTATATAAACCCCAATT(A/G)AAGTTTCATTTCTCTCGACTCACACAGCGCAGAAAGAAGAGTTTCACTTTGTTGCTGAACGACGAAAAGAATAATCAAATCGAAAACCAAAAATGGCGGAATCATCATCATCATCTTCAACAGCACCGGCACCGAGAGCGAAGTCCGATA
Unigene0030272	25	T	-	A	NNNNNNNNNNNNNNNNNNNNNNNNNNNNNNNNNNNNNNNNNNNNNNNNNNNNNNNNNNNNNNNNNNNNNNNNNNNNNNNNNNNNNNNNNNNNNNNNNNNNNNNNNNNNNNNNNNNNNNNNNNNNNNTTGTAATCTCTCTATATATAATAA(A/T)GTCTTCATAGTACTTTTCAAAATACACGGTTTATTTAAATGCCTCTTAGTTTGAGTCTCTCGCATTTCAACAGATGCTAATGTTTTACTTTGCTTTAATTGTATAAAGGATTTTCAACATCGTCTCCTTAACTTAGTACTTTGCTTTATT
Unigene0030401	31	G	-	A	NNNNNNNNNNNNNNNNNNNNNNNNNNNNNNNNNNNNNNNNNNNNNNNNNNNNNNNNNNNNNNNNNNNNNNNNNNNNNNNNNNNNNNNNNNNNNNNNNNNNNNNNNNNNNNNNNNNNNNNNATTTTTTTTACTTGACGTAAATAACAAAAA(A/G)CCACATGAACTAATAAATTACACCATCTATACAATTGAATCATCTGAAAGCAATGCTACCATAAAACAAAGACGACAGATTGTAAAAGAAACATTATATTCACTCAGTGGTGGAGGGTGATGATACATTCCCCACCTTAAGAGCCAACCA
Unigene0031451	83	C	-	A	NNNNNNNNNNNNNNNNNNNNNNNNNNNNNNNNNNNNNNNNNNNNNNNNNNNNNNNNNNNNNNNNNNNNAGACGAAAACATTGGTAGTGCACAAGTAAATTTAGAAGGACTTGTTGATGGATCAGTCAGGGATGTATGGATCCCTCTTGAA(A/C)GAGTGCGTTCGGGAGAAATCAGACTTAAAATAGAAGCCGTAAAGGCTGATGACCAAGAAGGATCAATGCGTTCAGGCTCAGGAAATGGTTGGATAGAACTTGTTCTGATAGAAGGAAGAGATCTAGTTGCCGCGGATCTCAGAGGCACAA
Unigene0033115	144	G	-	A	NNNNNNNGTGAAACACATATACGAGAATCTGCAGTTGGCAGATGCAGGGGGACTGGCACCATCATCGGCACCGATGGAAGCAGAAGCGCCGTCTAAAACTTCAAGAATTATACCAGTTTTGACTCCTCTTCCTCATTCAGCGTCTTCTCC(A/G)TCTTATTATTTCTTCTTACCTTCTGCATTATTCATAGGAATAGCAATAGTATTGGTTTGTTAATGTGCAGCAGCATTCATAAACACTCGTACCGATATTATGCATGCAGCTGGTTGCTTTGTGTTCATGTTTTCCCTTTTGAGCTCTGAT
Unigene0033652	37	G	-	A	NNNNNNNNNNNNNNNNNNNNNNNNNNNNNNNNNNNNNNNNNNNNNNNNNNNNNNNNNNNNNNNNNNNNNNNNNNNNNNNNNNNNNNNNNNNNNNNNNNNNNNNNNNNNNNNNNNAACCACCAAGTCTGCCGGGGGTTGTCAGGTGTAAGC(A/G)GCGGGCAGAGAAGTTATTTCAACCACTATGACCTGAAACCACCAAGTCTGCCGGCAGATATCATACTTATTTAGAACAAAGAATGATTTCCCAAATGCCGGATGTCAAAAAGCTGATTCCTCAGCTGCCAAGCTCTTGACATTAATTAGC
Unigene0033652	41	G	-	A	NNNNNNNNNNNNNNNNNNNNNNNNNNNNNNNNNNNNNNNNNNNNNNNNNNNNNNNNNNNNNNNNNNNNNNNNNNNNNNNNNNNNNNNNNNNNNNNNNNNNNNNNNNNNNNAACCACCAAGTCTGCCGGGGGTTGTCAGGTGTAAGCGGCG(A/G)GCAGAGAAGTTATTTCAACCACTATGACCTGAAACCACCAAGTCTGCCGGCAGATATCATACTTATTTAGAACAAAGAATGATTTCCCAAATGCCGGATGTCAAAAAGCTGATTCCTCAGCTGCCAAGCTCTTGACATTAATTAGCATGC
Unigene0033652	42	G	-	A	NNNNNNNNNNNNNNNNNNNNNNNNNNNNNNNNNNNNNNNNNNNNNNNNNNNNNNNNNNNNNNNNNNNNNNNNNNNNNNNNNNNNNNNNNNNNNNNNNNNNNNNNNNNNNAACCACCAAGTCTGCCGGGGGTTGTCAGGTGTAAGCGGCGG(A/G)CAGAGAAGTTATTTCAACCACTATGACCTGAAACCACCAAGTCTGCCGGCAGATATCATACTTATTTAGAACAAAGAATGATTTCCCAAATGCCGGATGTCAAAAAGCTGATTCCTCAGCTGCCAAGCTCTTGACATTAATTAGCATGCT
Unigene0034222	27	G	-	A	NNNNNNNNNNNNNNNNNNNNNNNNNNNNNNNNNNNNNNNNNNNNNNNNNNNNNNNNNNNNNNNNNNNNNNNNNNNNNNNNNNNNNNNNNNNNNNNNNNNNNNNNNNNNNNNNNNNNNNNNNNNNATATCAGGTAAATTTCCATATAATTA(A/G)ACGGATTAAAGTTCAATTGATTCAAAGAGTGAAAAATTAATCTTCACATTAGGTCACATTTCAATATCAAATTAACACAATCATATGCATGACATAACGAATATAGACAGATTTATGAAGAATTCCTAATTTATTGAAGGTAGCTCATCA
Unigene0034263	16	T	-	A	NNNNNNNNNNNNNNNNNNNNNNNNNNNNNNNNNNNNNNNNNNNNNNNNNNNNNNNNNNNNNNNNNNNNNNNNNNNNNNNNNNNNNNNNNNNNNNNNNNNNNNNNNNNNNNNNNNNNNNNNNNNNNNNNNNNNNNNGGAAAATTCAACATG(A/T)AATGTTTTGGAATAATACAATTGAACTAACATCATCCAAACATGTATATTCACCGTCCATTCAAAATTGCAGGCCCAATCAAACATTTTGAACAGAATTTGACACACAAAACAGAATTTAACACAGAACAGGAAGATTAAGGGTAGAAAT
Unigene0035386	93	G	-	A	NNNNNNNNNNNNNNNNNNNNNNNNNNNNNNNNNNNNNNNNNNNNNNNNNNNNNNNNNNATAAAATACACTTGAATTTCTCTATGGTGTCAACGCGATAATTCTGACAAAGTACCGGGGTCATATCGGTCTTTGTATAACCCGGCATAACA(A/G)AGTAAAGAGCCGAAGCACAGTGATTGGTGCATATAAAAGCATAGTACAGAGAGAGTGCAAACGCGGCGAAGAATTGGGAGAGACTGAGGAGCGAGAAATCCAACCATTTTCTTACCTCCTCTCTCGCATTTCCTTTGCGTTTGTAGCTTT
Unigene0038140	268	T	-	A	AATTGCAGCATAGCCATCACGATTGCATGGATTATAATACCCAGCAGTTAACTCAGCAGCATGACTAGCAGTCTTGTACCACCAATAAACACCTGATAGCTGTATTGAAATTAAAATATATCAAACAGACTGCAGAAGGCCACACAATAC(A/T)CGATACACCCGCAAAAACTAAATGAAGTACCTACAAATGGATAACTCCTAGTCAAATAGAGCAAGCATTAATGTAGCATTGATTTTACACTTCAGTTCTATTTTTTTCAGGTTATAACAGAAAATGTTATAGGTTACAAGAACAAAAAAC
Unigene0038426	79	C	-	A	NNNNNNNNNNNNNNNNNNNNNNNNNNNNNNNNNNNNNNNNNNNNNNNNNNNNNNNNNNNNNNNNNNNNNNNNTGGTGGGTGATATGACTCATAAGCATTCATCTTTAATCTATGAAACCCTTTGTGAGATTACCGAGCAAGCCCGTGCGG(A/C)AGGCTATAAACCAGACATAACAGAAGTTCTATTGGATGTTGAGGGATAGTAAATATAGGAAGAACACAAATTTTGCTTCGTGTATTTTGGTTTTACAATTATTTTGCATGTACTTATGAGAAGGCAAGTGCTCATTTTGTGGTTTTTCAA
Unigene0039078	96	T	-	A	NNNNNNNNNNNNNNNNNNNNNNNNNNNNNNNNNNNNNNNNNNNNNNNNNNNNNNNGTTTGATTTACCCCGACCGTCCGGTCCAAACCCGAATCTTGGTTCGGTAGCTTTTCCGGTTTTTGAAGAAAACAACACTATTGTTTTTAAAGTGC(A/T)GGAATCATTAATCAAACACTCACACGCATAAACCTCTTAGAATGTTTGGTTTTTGTGTTTCCTCCGTCTCCGCCGCCGCCACCGCCACCACCTCCGTCGCTTCCACTCGTATTCTCTTTGCAACCCCTTACCCTCATTCTTCTTCTCTCA
Unigene0039433	589	G	-	A	AAAGACGAGTTTGGATTGTTTTCTAAGTACTGTTTTGGATTCAGAGATTTCAGCTTCTTGAATTTTTCAAAGTAGAGATTCTGATGAGTATTGTGAAGAGCTTCATTTGAAAAAGTGAAATTTGGATAATTGAAGCCTTCAAACATTGTT(A/G)TGCAAACGAATGATTCAAAAGCGAAACAACGATGACTCGGTTTACTGAAAACCGCGTTTGGATGAATGAATTTAACCGCTGCTTCAACGTCCCAATTCGCGGATTCCATTTCTTCAATCATAAGTTTCACGAAACTCCGTATTGATCTCA
Unigene0040199	766	G	-	A	AGGTTTCTCAATTTCAGGTAGAGGGTCAGAACCAACAATAAGTGCAGCTGCTCCATCTCCGAATAATGCTTGTCCAACAAGACTGTCCAAATGAGTATCACTAGGTCCACGGAATGTAACTGCAGTCACTTCAGAACAAACAACCAACAC(A/G)CGAGCGCCTTTGTTGTTCTCAGCCAAGTCCTTAGCCAAACGAAGCACCGTCCCACCGGCAAAGCACCCTTGTTGGTACATCATGTATCTCTTCACATATGGGCGAAGACCTAACAGTTTCGTGAGTTGGTAATCTGCTCCGGGCATGTCT
Unigene0041571	105	G	-	A	NNNNNNNNNNNNNNNNNNNNNNNNNNNNNNNNNNNNNNNNNNNNNNTGGAAAACGAAATACATCGTAAAGAGAATAAAGTGATGTAAAATAAACAAATAAGTGATAGAGAATATGCACCAGAGAATTATACAATGCGGCCTAATCACTAG(A/G)CCTACTCTTGTCCCCAAGAATTTCCTCTTAAGAGTTCCACCAAACAGACTTGAGTTTTTCACAAGTGATGCCCACGAACCTTCATAATACTAAACAACAGATTTTATGTAAACTGATTTTTAAACCGAACAAAGCTTTTAACAAACTAAG
Unigene0041706	761	G	-	A	ACATTTGCTTTCATTTGAAAACTGAAGAAATTTTAAATAAGCTGCTCATGCCGGGATTCTGTGGAGAGCTTGTTCAAACTGGCATTATAGTAATTGATGCTTTTATCGATTTTGTTTATATAACCTTTTGGTTTATGTGCCTTCATTTTT(A/G)TTATAAAACCTTTTTTTAGAGGATTTTGTNNNNNNNNNNNNNNNNNNNNNNNNNNNNNNNNNNNNNNNNNNNNNNNNNNNNNNNNNNNNNNNNNNNNNNNNNNNNNNNNNNNNNNNNNNNNNNNNNNNNNNNNNNNNNNNNNNNNNNNNN
Unigene0041962	70	G	-	A	NNNNNNNNNNNNNNNNNNNNNNNNNNNNNNNNNNNNNNNNNNNNNNNNNNNNNNNNNNNNNNNNNNNNNNNNNNNNNNNNNGTTAGTCTGAACTATTAAAACATTGTTCAAGGCATATATATACACATTATATATCCATGACCACCACCA(A/G)AAGGTAATATACATAAGTGGTAGTGGAGTTTTATTCATCCATAACTTAGGAGTGTTGGTGATCTTTATACATTCACGCATGTAATCTCCATAACATAATAACATGACGATTTGATGGACAAAAGCTTGGATTTTAATCTCTTAAATGGAG
Unigene0042106	58	G	-	A	NNNNNNNNNNNNNNNNNNNNNNNNNNNNNNNNNNNNNNNNNNNNNNNNNNNNNNNNNNNNNNNNNNNNNNNNNNNNNNNNNNNNNNNNNNNNNTTGCAAAAGAAAAGGAATTGAGTTCACTTGTATTTCCTGTTTTGAAATGGATTATCT(A/G)ATTAATTAATTACAACCCGTGGTTTAAATAAAAAGCGATACTACTACAAAGTTCCGAAATCAGCGATGGACAAAGGCCTTTAAATTCCCCTTCGCACAAACATAATCACAATTTATTTTCTTCCAGAACCTTTCTCATCACACTCTCCTA
Unigene0042172	120	T	-	A	NNNNNNNNNNNNNNNNNNNNNNNNNNNNNNNAACACTGCAACATCAACTTTTTTAACCATTTAAGCTCTGTTGAAGATACAAATATTACATGCATGAATGAAAATATGACGTAAATATGTATAAACACCATAATGCAAATGCTTATTTTT(A/T)TAAAAATCACTCAAGAATAAGAGTATCTTAGAATAAAACTTTGCTCTCATCATTCAGACGAAAAGCACATGATTCATCATCCCAGTAATATTAATACAGAAGACAGCACAGATATTACTGTGAAATAAAAACACATCTCACACAGCTATA
Unigene0042172	121	T	-	A	NNNNNNNNNNNNNNNNNNNNNNNNNNNNNNAACACTGCAACATCAACTTTTTTAACCATTTAAGCTCTGTTGAAGATACAAATATTACATGCATGAATGAAAATATGACGTAAATATGTATAAACACCATAATGCAAATGCTTATTTTTT(A/T)AAAAATCACTCAAGAATAAGAGTATCTTAGAATAAAACTTTGCTCTCATCATTCAGACGAAAAGCACATGATTCATCATCCCAGTAATATTAATACAGAAGACAGCACAGATATTACTGTGAAATAAAAACACATCTCACACAGCTATAG
Unigene0042246	122	C	-	A	NNNNNNNNNNNNNNNNNNNNNNNNNNNNNGAATTCTGCAACGCGAAACTTTCTAAAAGATGAAACTGCAAAAGGTTTCACTTTAGATCTACACATGATCTTTGTTCCAAAGAAAAAGATCCATTAAAATAAAGGGCTGCATCTCTTTGCT(A/C)CACATAATGAATGTGTTCATTCACAAGTAATAATAATAATTGAGAACTACTTTTAACCCCCACACTGTTTTCTTAAAAACCATGCTCTGAATTCTTGCTACCTGTTACAGATGAGGTTTTTAAGAACCATGGGTGAAAAATTAAGCTCCA
Unigene0042402	40	T	-	A	NNNNNNNNNNNNNNNNNNNNNNNNNNNNNNNNNNNNNNNNNNNNNNNNNNNNNNNNNNNNNNNNNNNNNNNNNNNNNNNNNNNNNNNNNNNNNNNNNNNNNNNNNNNNNNNAAAAAATGCATTTAAATTTAGAAGACTAATGCTTCATTC(A/T)TTCAAGTGGGAGGTAGACATTTGTGTCATTGAATGTCGATAACGTGACTAATCTCTTTCTCTCTTTCCGACACTCTCAAAAAAATCTGCTAGCACTCTCAACTTTCCATTCCAATTCGCAGATCCATTTTTCTATCTTCATCGATTTGTT
Unigene0043502	1201	G	-	A	ATCCAACCTGAATAGCAGTGGTGATAGCTTTCGCTACAACACCAGGTTCAGCTTGCCAAGTTCCTAATCCAACGGAAGGAATTCTAGCACCAGTGTTCAACTGAAAAAATTTGATAGCTGTGGCCATTTTGAATTTGTTATTCGGTTAGC(A/G)TTTTGATGATATTTATAGCAAAAAAACAAAAGGAACAATGGTGCAGGAATGTGAAGAGCGTGAAAGGGAAATGGGATCGAACGGTTAGGATTGGCTGAATTGGATCTGAGAATGATTTGGACGGTGAGATATTGGTCTATTTGGGAAGAG
Unigene0044104	81	G	-	A	NNNNNNNNNNNNNNNNNNNNNNNNNNNNNNNNNNNNNNNNNNNNNNNNNNNNNNNNNNNNNNNNNNNNNNCAAAAATTTGGGCAAGTGATAAAAGCAAAATCAATTAAGCAAGAGATACGATACGACGACGTTTAATGAGAAACCGTTCT(A/G)GACACAAAGCTGGCAGCACTGAATCTCAGTCGAAGAAAGCAAGCAATATCAATAGCAACAATAACAACCAACATTGAGCTCATTTCAATCACGAGATCGTGAAAGAAGAAGAAGAAGTTAGTTGAAGAAATGTCAGTGCAAGAATATCTC
Unigene0045190	36	T	-	A	NNNNNNNNNNNNNNNNNNNNNNNNNNNNNNNNNNNNNNNNNNNNNNNNNNNNNNNNNNNNNNNNNNNNNNNNNNNNNNNNNNNNNNNNNNNNNNNNNNNNNNNNNNNNNNNNNNNAAAAATTATTCCATATGACTTTGACTCAAACTAAT(A/T)TTTCCCTTTATTCTCTTAGTTCTATAAAATATCGAGCAACAAAAATGACTTGACTCAAACTGACTTAAGGGCCCCCTATTTTATCACTTAGATGCAATCGTGTATGTAGTGGACCAAACTGTCCAAGAACCGAACATAATATGATGCAAT
Unigene0045298	42	T	-	A	NNNNNNNNNNNNNNNNNNNNNNNNNNNNNNNNNNNNNNNNNNNNNNNNNNNNNNNNNNNNNNNNNNNNNNNNNNNNNNNNNNNNNNNNNNNNNNNNNNNNNNNNNNNNNTATTGAGTAAGATCACAAGTCACAACAAGAATCAAACAAGT(A/T)GGCATTAACATTTTTATTATATGAAATTATACAACAACACACCATGTGATAAAACTATAGAAACAATGTGGCCTCCTTTCAATCCTTGCGGAGGCAGACAGATATAAATAATAGTTGACTTTGAATGATAATGTGCAAACAGTGTTTTGT
Unigene0045552	1042	C	-	A	ATATAGCATTTTATTCTTTCTTCCAAGTTATTTTTATAAAATTTCTATTTAGTGAATAGCATACAAAAGTTTGTGATGTGAAATTTGAATGGGATTGGATTAGACACTTTGGTTAGTCTTCCAAATTGTCAAATAAAGATTCCAAGCTCT(A/C)GAAGTGTTGTTATTATTGATTCTATTCTTTGTGGGTTTTAATTCTGAANNNNNNNNNNNNNNNNNNNNNNNNNNNNNNNNNNNNNNNNNNNNNNNNNNNNNNNNNNNNNNNNNNNNNNNNNNNNNNNNNNNNNNNNNNNNNNNNNNNNNN
Unigene0045590	159	T	-	A	ATCATACAAAATTTCCAAAGTCTAAAATGCAACTTTAGTTTTGGAAACAAATTAAATATAGACATATTCCATTGTCGCATTATCAATTTATCACGTGAACTCCAATATTCTCTTCTTTCAACGTAAATATACAACCAAAAAAAACTCTTA(A/T)TCCTAAAGATCCACCCAAAACACAGGTTCGGAAGATGGAGAAGCTGGTGGAAGTGTGCGAACCAGCTGAGGTTCGGATAGAATTCACACTCAACACCAAATGCCGAGCCACTGTACAACTCAAGTCACTCCACTCAACCACACCAATAGC
Unigene0046059	61	T	-	A	NNNNNNNNNNNNNNNNNNNNNNNNNNNNNNNNNNNNNNNNNNNNNNNNNNNNNNNNNNNNNNNNNNNNNNNNNNNNNNNNNNNNNNNNNNAAAATATGAAAATTGATATTGATAAGTTGAACCTCATCACTTTAATTCAAATCTCACCGT(A/T)GTATTTGATCATTCACACCAAGCTAGATCTAAACTCTTTTGATGAAAATGACAATATATACACATATTGACATACACCGTGGTAATGGTGTTAGTCCTCAACTCATATCATTTACATTTTGCAACTAGTCATAATATGTTCAATCGATTT
Unigene0046059	75	C	-	A	NNNNNNNNNNNNNNNNNNNNNNNNNNNNNNNNNNNNNNNNNNNNNNNNNNNNNNNNNNNNNNNNNNNNNNNNNNNNAAAATATGAAAATTGATATTGATAAGTTGAACCTCATCACTTTAATTCAAATCTCACCGTTGTATTTGATCATT(A/C)ACACCAAGCTAGATCTAAACTCTTTTGATGAAAATGACAATATATACACATATTGACATACACCGTGGTAATGGTGTTAGTCCTCAACTCATATCATTTACATTTTGCAACTAGTCATAATATGTTCAATCGATTTCGGCGTGTACATAA
Unigene0046094	65	G	-	A	NNNNNNNNNNNNNNNNNNNNNNNNNNNNNNNNNNNNNNNNNNNNNNNNNNNNNNNNNNNNNNNNNNNNNNNNNNNNNNNNNNNNNNTAGGCATTATATGTCATAGGCATGTCATTTTATTTAATATACTACCAACATTAAAGTAGATGAG(A/G)TCCACATAAATAACATTTCAATCTCTAAATAACAATTTTAAAATCAAGTGAGTCAAGTATTGGCATGTAAAGGGGGATAAACAATGAACATGGATGAATAATCCACTTAGCTCTATAAATTGATCGTATCAAAGTTTAAATTCCTTCTAC
Unigene0046402	140	G	-	A	NNNNNNNNNNNCGAAGAGCATGACTGGTCTAGACCAATGTTAGCTAGCAGCAAAGCTTAATATAAGAGAAGACTCTGGAAATCATTTTACTTTCTCTAGTTTTTGTTATGATAATGCATAATACTTGTTCTCAAACACATATTTTATAAG(A/G)TGAAATAAACATTTTCTACAAAGAATCATAATTTGGTGCATATTGAATAACAAGATCAACAATGTAACACAACACATCCACAACTGGGTGCGAACCCATGGTGGCCAACCAATACATACATACAAACGATTCATCTTTCTTTTAAGTTCT
Unigene0046589	18	T	-	A	NNNNNNNNNNNNNNNNNNNNNNNNNNNNNNNNNNNNNNNNNNNNNNNNNNNNNNNNNNNNNNNNNNNNNNNNNNNNNNNNNNNNNNNNNNNNNNNNNNNNNNNNNNNNNNNNNNNNNNNNNNNNNNNNNNNNNTGCCAAACCACAAACAA(A/T)CTAGTTTCTCTTCCAATGTTCCTTTTTTTTCTTCTTTTACTTTCTCTAAAGAGAATCATCATGAACACAGATTGTTCACTTTAATGTAATATCCATGAACCTTAGGTCAAAGATATCAAAGTGGAGAACATAAAAGAAATCACATGACAT
Unigene0047123	1558	G	-	A	TTGTTAGGAGTGTGATAGGTTCATTCATGGTTAGATTATTCGAGAGCTGCAGCCGGAGACGACTTATTAATTTGATAATAGTTTCGCTCAAATTATGAGTATGAAGCAATTAGTTTTCATATCGTTACTGTTTTTATTGGAGATATCAAT(A/G)CTGTTAAGCTGCGTTTATAAATAGAAATTATTAGTTCATCTTGTGAAGAAAGAAATTATTGAAGCATGGCATGGATTAACAACAGTGCATCATATGTGTGCAATGTGCTTAGTGTGGGNNNNNNNNNNNNNNNNNNNNNNNNNNNNNNNN
Unigene0047187	49	G	-	A	NNNNNNNNNNNNNNNNNNNNNNNNNNNNNNNNNNNNNNNNNNNNNNNNNNNNNNNNNNNNNNNNNNNNNNNNNNNNNNNNNNNNNNNNNNNNNNNNNNNNNNGTTGGACTCAAATAGCTAATGAATTTTGACTGATGTCAAATCAATCGC(A/G)AGTACTTGAGTGAGATCATCATGATTCAACAATGATGAACATGATTTCTCTGGTTTGTACAAAAAAGAATTGAAATGGCCAATTCATGTTACAATTACAATTACCAATATTGACCAACTTTGCCACCCTTGAAATCCTCAACAAGAGGAA
Unigene0047567	75	C	-	A	NNNNNNNNNNNNNNNNNNNNNNNNNNNNNNNNNNNNNNNNNNNNNNNNNNNNNNNNNNNNNNNNNNNNNNNNNNNNAAGCACTTGAAATTTTATCTCAACTAAATCAATATCAGCCACAAAAACATTCTTCTCATATTCTCTTTATTTTC(A/C)AAGCTTTAGATACAATGATCAAGTTTGCAACAAGCAAATTCATGACTATATCTATAATTTTTCTTCTTCAACAAAACTTAGTATGTTCAGAATGTAGCTGTGAAAATGAAGTACAAGATTCTAATCATAAAGTATCCGAGGCATTGAAAT
Unigene0048848	114	G	-	A	NNNNNNNNNNNNNNNNNNNNNNNNNNNNNNNNNNNNNTCCAAAGCTAAAACATTTGAAGCCAATTTCATTGATTCATTGACATGACATAATTACAAAAACATTCATTCAAATTTATACAACAACTAGTGATTAAGGATGTTGAGAAGAGA(A/G)ACTCTAATCCTAATAAACCGTTTAAAAAGAACTTCAAGTGCTTCCACAAACTCTTGAACAACAGACTCCAAATTTTCCAATTGATTCTGCAAATGATTGACATTATCTGACTTTCTTGTCACATTAAACACAAAAGACTGCAAAGCAGCA
Unigene0049359	1365	G	-	A	TTGCGACGACATTTGATTTGACCAAACATTAACAAGTTCTTTGATCGATGTTTGAACTTCAGAGACACGAATGTGACTCAGTAGTTCAATTCTTCGATTAGAGAGAATTTCTAGGGTGACAATTTTCCTTAATTGGCGCCAATATGTACC(A/G)TATGGTGCCCAACCAATGAAAGCTTGATTATACGACATAAGCTCAACCGCGACTGGTTTAGGGCGTGACGAAACGACTATGTCGTTTTTGGTAAAACATTCTTTGGCTAATTCCCAATTACTAAGTACCAAAGCATTTGTAGCACCTAGT
Unigene0049558	1672	G	-	A	TTTTATCTCATTGGTAATATGATGAAGTCCCATTGCAGGATCCTCGATCCGTTGACCTTCCTTGCCGTCTTTCTGGAATTTGTGATTCTCTTTGATATGAGTTAACCGATTTGCAAAGTTTGCTGCTGAATCGGCTTTCCATTCAATACC(A/G)TTGGGATCCATGCTAACAGATTGCCATCCATCATCAATTATCACAAATTTAGCAGGAATTCCACCTTCCTCAAAACTATGTAATCCTTCTTTCACATTCTCTGAAGTTACATTGGTATAGAAAGCATCCCATGTACACCAACCGAACCAA
Unigene0049712	122	G	-	A	NNNNNNNNNNNNNNNNNNNNNNNNNNNNNCACAAAATCAACAAAAACCAGTTTTTACCAATTCTCAATTATTAATCTACCACACCATCTACCTCAAACAAACCCTTTTCTCTGTCTTCTGCCAAACACAAGCCAACCAGAAAAAACATAA(A/G)CTTTTGTTCTTCCAACAGACAATAGTTAAGTTCAAAAAGAAAAAAACAGACATGGAAGAAACCACTAGTGTTAGTTATTGTAATCATAATTATAGTGGATCACCAATAACAAACATACCTCAAGATTACATCTTTACTATTATCCTTTTT
Unigene0049712	1835	G	-	A	ATAGACCAACTATAAGATCTTGATCGAATGATTTAGATTTGACTGCACTCAACTCAAATCTCTACTTAAGGAAACAATGAATCTCATGTCATGTGCTGTGTTAAGACCAGTATGTTATGTGCAGTATAGTTCATCAATGCATTTTCAATC(A/G)CATAACCATTATGTAGTGTTTTTTAATGCTTTTTATAGTATTGTCATTGTAAATACATAAAAACTATTGATTTACATGTATTAACTGCAACTACTTATTAGAAAGNNNNNNNNNNNNNNNNNNNNNNNNNNNNNNNNNNNNNNNNNNNNN
Unigene0050666	57	G	-	A	NNNNNNNNNNNNNNNNNNNNNNNNNNNNNNNNNNNNNNNNNNNNNNNNNNNNNNNNNNNNNNNNNNNNNNNNNNNNNNNNNNNNNNNNNNNNNNTTAACTTCTTCTTTCAATCACTATAATCCTCTTTTAGTGATGTTATTTCTGTCTAA(A/G)TTATCTCTTTTTGTTTTAATCTTTTTCTCATCTTCTTTTCTTCTCTTTCAAGTTAATGCTACTAGATCTCTACCCAGCAAAATCACAGACAAAGTCAATGAATTTGAGTCCAAAGTTGATTCCTTTATGATATTCAAAGAGGCCCCAGAA
Unigene0050666	654	G	-	A	TGAGAATCTGATATCTCCTTCGATAAGACAAGCGTTAGAGAATCCTTTGAATTATGCGAGAAGCTATTTAGCTGATTTGCTTGAAGAATGTGTTGAGAGAGTTATATATTTAGATTCTGATGTTATAGTTGTTGATGATATTCAAGAACT(A/G)TGGAAAGTTTCGTTGAGTGATTCGAAGGTGATTGGTGCACCGGAGTATTGTCATGCGAATTTCACAAGGTATTTTAGCTATGAGTTTTGGTCGAGTTACGAATTTTCCGAGGAATTTAAGGGAAGAAAGAAGAAGCCATGTTATTTCAAC
Unigene0050785	217	C	-	A	ATTTGTTGTCAAGACTGAATACCAAATTACAAAGTGGTGGTACTTACGCCCTGACGATATCGAATCTCAGTATGATCCCCAGAAAGTTGGAGTGGCTGGGTTGAGTCATTTGATAACTGCTCTGATTCTCTATGGATATTTGATACCCAT(A/C)TCACTTTATGTTTCAATTGAGGTTGTGAAGGTTTTACAGGCAACTTTCATTAACCAAGACATTCAAATGTATGATGAAGAAACCGGAACTCCAGCTGACGCACGGACTTCAAATTTGAACGAAGAGTTGGGTCAGGTGGATACAATTCTC
Unigene0051339	1320	G	-	A	AAAAAAGGTCTCAACAAAAGTCATTTGTAGATGTATAGTCCAATTTTCACCTTCCTAAGGTACATAACATATGTTAGTTCCAATAGATTTTATGTTGTTATGTTGGATAGTATATAATTAGTATCATGGTTATAAACTGCGGTCAATAAC(A/G)TGATAGATTTAGATGTTTANNNNNNNNNNNNNNNNNNNNNNNNNNNNNNNNNNNNNNNNNNNNNNNNNNNNNNNNNNNNNNNNNNNNNNNNNNNNNNNNNNNNNNNNNNNNNNNNNNNNNNNNNNNNNNNNNNNNNNNNNNNNNNNNNNN
Unigene0052169	725	G	-	A	ACTGTTTGGCTTCATCCATATTTCTGGAGTAGCCAATCTTTCAAGAACCCTCTTAGGCATAGAAGTTTCAGTTTCAGTTTCAGTCACAACCCTTTGAGCCGAAGCCCAATCTTCCTTAAACCGTTGCAAAATCAATTGTCCATTTTCAAT(A/G)CTTTTCCCATTCATTTCAACCCCAGCACCAATAAACGAAACCTTAAAAAAAACCGACATAACAACCATCAGAATTAAAACCGCAAAGATCTTCCGACCCACGTTTTTCCCGGACCGGAGACCCTGAACCGAACCGGACAACCAGAGAAAA
Unigene0052336	70	G	-	A	NNNNNNNNNNNNNNNNNNNNNNNNNNNNNNNNNNNNNNNNNNNNNNNNNNNNNNNNNNNNNNNNNNNNNNNNNNNNNNNNNGACTATTATTATGTTAACAAGACATCAAAAAGCGACCGATCCGCGTTTTTCATGCTATATGATTCAAGC(A/G)ACAAAAATATTGATTTTTACTTAATTTATGCTAGAGAAGGAACTTGGAGTTTTGGTCTAAGACATGTTAATACTAGCCGTGATTCTTTGAAGCAGAAAACTAGCATGTCTATTTCACTTGAAGGATGTCCGAACCAATGCTCCTCTCATG
Unigene0053138	82	G	-	A	NNNNNNNNNNNNNNNNNNNNNNNNNNNNNNNNNNNNNNNNNNNNNNNNNNNNNNNNNNNNNNNNNNNNNCTTCTGTCTGGGATTTATCTCTGTCGGGCTAGCAAGCAACAACCGATCATTCAAAGCACCAACCAAGACTGCACGAGGCAT(A/G)CTAATTGAGAGAATAGTCCTCACTTTTCCATCCCAGCCTAGTATACTGATTGCAGTGGCAGTAGAAAAGAGAAGGGCAGGCCCAACCCATAAGAGTGATCTGAACGGAGGAAGCCCCTTGTCAAAATTTGTAGAAGTGCCAGCAAGTATA
Unigene0053357	202	T	-	A	ATCTCTATCAGCTTTTGGAGCTACTACTACTATTCACCCTGATGAAAAGAAAGCTCTTCAAGATATAGCTAACTCACTTGGTAAGAAGAATTGGAATTTTGACACAGATCCATGCAGCAACAAAAACTGGTTTACAGAGTTAGAGAACAG(A/T)GTCACCTGTAACTGCTCTGTAGCTGGTGACAACTTCTGCCATGTTGTTACAATAATTTTGAACATGCAAAATCTTCCCGGCACTCTCCCACCAGAACTGNNNNNNNNNNNNNNNNNNNNNNNNNNNNNNNNNNNNNNNNNNNNNNNNNNN
Unigene0053612	603	G	-	A	ATGGTAAAACATTCCAATCCAGAAAAGATCAGACAAAAACTTGATCAATCCTACTTTGGCTATAGCATTTCTAAATCCAAATTCCATGAGTTGAGGTCCCTCAATAAGTATTGCTGGAGGGATACAAAAGGCGAGCGCAATTACTGAAAT(A/G)TACGCATATACATTCGTACTGTCCATTCCTGTCATAGCTTTCTTAGAATATAGACTTCTGTATGTAAATGCAATATTTGAAATCATTGCACTAATGAAACCAGTCCAATTGAAAGACAGTTCAGTTAGTGATGCCATTGATACACCAAAA
Unigene0053632	138	C	-	A	NNNNNNNNNNNNNGTACACGATTCCAACCTAAATTCATTCGATCTAAAAACATTATCCAACATTCGGACGCAAACTAGAATACTAACTTTTCACTATTCATTTTCAATGTCACTAACAAATTTTAGAAAACATATATTGCAAAACTTGAT(A/C)TTCAATGGATATATATTTTTGTTTCTTTACGTGGATACTCCATTAGATGCATGGGATTGGACAGTCATAGTTATTGTGTATATGTATAAAGTCTCATTCATCATCTTTCCTCAACATGTGAGTGTGAATCAATTTAATGAGGATGAACCT
Unigene0054152	437	T	-	A	ACCAAGCATATCAACCATGCATGCCACATGATCCATTCTTTGAGCAAGTCCGAATTCCAAACTCATTGATTGAAACAAAGCAAAGCCCTCATCTATTAGCCCCAAATGGCTACAAGTCATTAGCAGCCCTGTGAAGGTTACTTCATCAGG(A/T)CTTACGCCGGATGCCACCATTTCTCTGAACATACATATAGCTTCATTACCCCTTCCGTTTAGTCCAAATGCAAACAACATTGAATTCCAAGAAACCGGGTCCTTCTCACTAATGTCGTGAAATGCGAGCCCCGAACCTTCTACATCTCCA
Unigene0054152	443	G	-	A	CATATCAACCATGCATGCCACATGATCCATTCTTTGAGCAAGTCCGAATTCCAAACTCATTGATTGAAACAAAGCAAAGCCCTCATCTATTAGCCCCAAATGGCTACAAGTCATTAGCAGCCCTGTGAAGGTTACTTCATCAGGTCTTAC(A/G)CCGGATGCCACCATTTCTCTGAACATACATATAGCTTCATTACCCCTTCCGTTTAGTCCAAATGCAAACAACATTGAATTCCAAGAAACCGGGTCCTTCTCACTAATGTCGTGAAATGCGAGCCCCGAACCTTCTACATCTCCACATTTA
Unigene0056542	702	G	-	A	ACCTTCAACCCAATTAGCAAGTTCACCTCTAGCTGCATCTTGATTATAGTTAATCTTCCCGTCATTACCGTTAGAAAGTGAGTTCCAATACTCTCCAACTGCAAAATCTGGTTTAGTTTGTTCCACATAAATTTTGGTTATACTAGGAGC(A/G)TAGCCTTTGACGAAATCGAATCTCCAACCGGAAAATCCGATTTCCGTTTTGAGCCAATNNNNNNNNNNNNNNNNNNNNNNNNNNNNNNNNNNNNNNNNNNNNNNNNNNNNNNNNNNNNNNNNNNNNNNNNNNNNNNNNNNNNNNNNNNNN
Unigene0056542	705	G	-	A	TTCAACCCAATTAGCAAGTTCACCTCTAGCTGCATCTTGATTATAGTTAATCTTCCCGTCATTACCGTTAGAAAGTGAGTTCCAATACTCTCCAACTGCAAAATCTGGTTTAGTTTGTTCCACATAAATTTTGGTTATACTAGGAGCGTA(A/G)CCTTTGACGAAATCGAATCTCCAACCGGAAAATCCGATTTCCGTTTTGAGCCAATNNNNNNNNNNNNNNNNNNNNNNNNNNNNNNNNNNNNNNNNNNNNNNNNNNNNNNNNNNNNNNNNNNNNNNNNNNNNNNNNNNNNNNNNNNNNNNN
Unigene0057612	532	G	-	A	GGAACTAGAAGAGATAAAGAGACTACATGTGAGTGACACATCAATTGATAAAGAGAAAGATTCAATCGAATTAGGGCTCGCGAAGCTTTGTCTCGAAAGAAACATTCCTTACTTGGGAATCTGTAGAGGTTCGCAGCTCCTAAATGTGGC(A/G)TGTGGAGGTAGTTTATATCAAGACATAGGAAAAGAGATTTCTAACAAGTGTTTACAAGAGAGTGAAATGGTGATGCATATTAACTATGATGATTATGATGGACATAGACATGAGGTGAAAGTTGTGGAGGATACACCTTTGCATCATTGG
Unigene0066640	100	G	-	A	NNNNNNNNNNNNNNNNNNNNNNNNNNNNNNNNNNNNNNNNNNNNNNNNNNNTTTAAGGCTTGGTGAATTGAGTAAATTCCCAATTCCATGCTTGTTTTTGGTAATTCTGTCTTGTAATTAGGACAATAAAGTTGTGTTGTGTAAGAGGGT(A/G)AAAAGCTGAATCTGAAAAAACAAGCATGGAAATGGAACTTTTTGCGACAAGTTTGAAGAGAATGTGAGGACCCCATGAGTTTCATTTATTGGAGCCACCAAAGGACAAGTACAGTATGTATCTATTTATGGCTAAATGTCAAATGGGTTC
Unigene0072892	119	G	-	A	NNNNNNNNNNNNNNNNNNNNNNNNNNNNNNNNGTGACAGTGCCCTCAAGTTTACTCATGTTCTCTATAATCTCTCTCCAGCAGAACTTTATGAGCAAGCAATAAAGCACGAGAAAGGATCGTTCATAACTTCAAACGGAGCCTTGGCCAC(A/G)CTTTCGGGGGCCAAGACCGGACGGTGTCCGAAAGATAAACGTGTGGTGAAGGATGACCTCACTGAGAATGACCTTTGGTGGGGAAAGGGTTCTCCGAACATTGAGATGGACGAGCACAGTTTCATGGTGAATAGAGAAAGAGCTGTTGAT
Unigene0082962	35	C	-	A	NNNNNNNNNNNNNNNNNNNNNNNNNNNNNNNNNNNNNNNNNNNNNNNNNNNNNNNNNNNNNNNNNNNNNNNNNNNNNNNNNNNNNNNNNNNNNNNNNNNNNNNNNNNNNNNNNNNNGCAAAAGCATCCCTATAGAGAAAGTAGACTTCAG(A/C)CTTATAAATAATCTGCATCATACCAACCAAGAATGAATAATAATATAAAAAGAAGAAAACAAAATTATATGGGCATAAATCAAACCCATCCTCTTCCTGAGAAACACTAAAATTCATCAAAAGTAATTGCAGCTCTAGCTTTCACACCAC
Unigene0083711	179	G	-	A	CAGTTACATGAATCAACTTCCGCCATAATGTTTTAGCGAGGACCATGCTTCTATAAAAAAAAACTATGCACCAATGGTGTTAGCAAGTTTTATACAAGTCTTCAATTTTGTTTCACCACCCTTCCGCATCATGACACTACTTCTTAAATT(A/G)TGTTTAAAATGTGGTGAGATGGTGGTATATGACTGGATGTCTTTGTAAACTTGTTAAGATTATCAGTGTATAGTTATTAAACTAAAAAAACAACTATATTTATACTCAACATCAATGATAGTAATTGTAATTTGGTAGTTGATTTGAATT
Unigene0084948	493	C	-	A	CTTTAAAACAGAATCAATTGGATAGTTTTCTTTAAGCCTAGGATCCACCAATATGCGAAGAGCTTCTAAAGGATCGATCTGATTAAGTGCTTCTTCAAACAATGCTACAAGACCCTTTGATTCGACAGCAGATTCACCTGTCTTCAGAAT(A/C)GCATTCTTTGCAGAAATAAGCTCATAAAGAACAACTCCAAAAGCATATACATCTATTTTTGGAGAAACATCGCCATATTGAGCATATTCTGGTGGCATGTATCCAAATGTTCCCACGAGACGAGTGTGGAGTGTGGAGTTTCCAACTTCA
Unigene0085465	1598	C	-	A	TTGCTTCATGCTTGCAGTCATGCAGGATTAGTTGAGAAGGGTATGGAGCTTTTGGAGTCTATGACTAGAGATCACAACATAATCCCTAGGTCAGAACATTATGCTTGCATCGTCGACATGTTGGGGAGAGCAGGACATCTTAATGAAGCT(A/C)GGAAATTCATCGAGGGATTGCCTGAGCATGGTGGCGTGCTAGTTTGGCAGGCATTGCTTGGTGCCTGTAGCATACACGGTGATTCTGAGATGGGTAAATATGCTGCTGATAAACTATTTTCAGCTGCACCAGACACCGCAGCTCCTCATG
Unigene0086169	424	G	-	A	AACTTCTAACATCCATGTTGCTGGATTATAGCCATCTTTGATTTTACTAACCCCTTCAATGCTCTCAAAATACTTGATCAGTTGACTCGAATGACGACCCAACGGCCCAACGTATACTTCTTGTCCTCCGCGCTTCATCAGGAATAACTC(A/G)TCAAAAGCTTCGAATATGTCGATACTTGGTTGATGAATGGTGCAAACAACTGTTCTTCCTGTGTCAACTGTGTTTCTAACGGTTCGCATAACAATTGCAGCAGCTCTAGCNNNNNNNNNNNNNNNNNNNNNNNNNNNNNNNNNNNNNNNN
Unigene0087135	115	C	-	A	NNNNNNNNNNNNNNNNNNNNNNNNNNNNNNNNNNNNTTTTTAGGAAAAAAGATATCATTGAGATGGCATTTTTCTTATAACAATATAAGGATACAAAAATGTAAAGACTAGAACAAAACATATAATGATACAAAAATGTAAATACTAGAA(A/C)AAAACATAAGAACCTGACCCCAACCAATATAATTCTAAAGCCACATTTATTCTATGCCCAACCTCCTAACAATCCCAACCCCACACACAACACAAGATATTGCTTCAAAAGATTGGTCCAGCTGCAAGAATCTCTTCTGTGAGGTTGTCA
Unigene0001348	99	G	-	C	NNNNNNNNNNNNNNNNNNNNNNNNNNNNNNNNNNNNNNNNNNNNNNNNNNNNGTTGGCAACAACCCTACAGGCTGAATTGTCACAATTACAAGCTGCTGCTTCTTTTGTGTGTCGTTTGGGATGGGCTACAAAAGTGATTGATCCCGAAT(C/G)TATTATTGGAAATTCCAGTATAACTATGTCTCCTAGAAGAAGTACATTCAGTGACGAAGATGCTTCTGTTGCTAGTCAGGGTTCTGAGAATATGTCTATTGATAATGACTCCACTCAGCAAGGAGATGTTTCAGCTTCAGGAAACTATGG
Unigene0002379	1284	T	-	C	AACTACAGAAGTTCCTATAAAAACATCATTCTTGCAGATTTTCTTTATTATGGCACCGTGTAGCTGCGTCCCAAATTTCAATGCTTTATTTTCTCCACAAGCCTTCAGTGCAGCACATATAGTATATTCATTAGGAAAGAACCCATCGCA(T/C)AGCATCTGCAAAAACATTAACAAGGCTTCGTGTCCGAGCCCTTGTTGGGAACAAGCAGTAATAATTGTCGTCCAACATACCACATCTCGCTTTTCCATACGATCAAATGTTCTAAACGCACTTGATATCTTACCACATTTCGAATAAAAA
Unigene0002468	116	T	-	C	NNNNNNNNNNNNNNNNNNNNNNNNNNNNNNNNNNNCTAACTTTCATACTCTCAACAACATCAACAAATTTTCCAACCCCTCAAATTCTAGTTCTAGTTCTATTTTCTTTATCTTTTCTTTGCTATGATTATGAAGAAGCTTTGTCCTAAT(T/C)TAGATAGAGAGGATGGACTTGAAACAGTGCTTGAAGTTCCTATACCAGAGGAAATTTTTATACACAAGAGTGGAACAATGAAAGCTTGGCAGAATGTGAAGTATTTTTGGATGAAGCCAAACGCAGAATCAAAAGCTGCTTCTATGACAG
Unigene0002558	36	G	-	C	NNNNNNNNNNNNNNNNNNNNNNNNNNNNNNNNNNNNNNNNNNNNNNNNNNNNNNNNNNNNNNNNNNNNNNNNNNNNNNNNNNNNNNNNNNNNNNNNNNNNNNNNNNNNNNNNNNNAAGCAAGTGATATATATGACTTGAAATTCTTGTCA(C/G)TGAGTGAAACACATTCTGTTTCATGATTTTTTAGTACATCAAATAACTATGTAAAGATTATCAGATAGGAAACAGATACATCATACATCTTGCATACATACATGGAAAAGGTACTCAAATTGAAAACTAACTAATTTATTTGAAGGGTGC
Unigene0002868	79	G	-	C	NNNNNNNNNNNNNNNNNNNNNNNNNNNNNNNNNNNNNNNNNNNNNNNNNNNNNNNNNNNNNNNNNNNNNNNNTAGACTATGATCACAATAATGATCTGATTCATAAAACTTTCCATAATGTGTAGCTATATACATGCCACTATACAAATA(C/G)CAACTTTTCAATTAAATATCCCCTTAAAAATCTACCATAACTGCAGGTTTTATGTAAGTATTTACTTATCATTTTTCTTGTTTTCACAAGATACATCACATCACATCACATCACATTTATTGTAACATAAAAATTTGCATACAACATATT
Unigene0003721	63	T	-	C	NNNNNNNNNNNNNNNNNNNNNNNNNNNNNNNNNNNNNNNNNNNNNNNNNNNNNNNNNNNNNNNNNNNNNNNNNNNNNNNNNNNNNNNNGAATGACACTGGGAATAACACTAAGAAGGCATGACTGAGTGAGTAATTGAGTAAAAATTACT(T/C)AACTATTGCAGTACTGGCACATTAAACTATTTGAGGTTTCTTTCTACAATGGCATGTTTCCAATCAAAAAATTGATCAGACGGGAAAATTTGATAACCCATTTCTAATTGGCAGCTCTATACAAATCTCTCCCTCTCTCTACATAGGACA
Unigene0003807	61	G	-	C	NNNNNNNNNNNNNNNNNNNNNNNNNNNNNNNNNNNNNNNNNNNNNNNNNNNNNNNNNNNNNNNNNNNNNNNNNNNNNNNNNNNNNNNNNNATGTAATACACTAATACTCACCACAAGGCAATAATCATAAATATTTTTACAGGTAGTTTA(C/G)GATTTCACAAAATCTCCTGGATGCAATACAGAACAGAACAATGGCAAACAGGCCATTAATGTATAGTTACAAAATAAGTAGAGCTGCAAAAGCCAAGAATAAACTGTCAACGAGCAACATTTCTTCTTTTACAAACAAAGGCCAACGTGA
Unigene0004557	77	T	-	C	NNNNNNNNNNNNNNNNNNNNNNNNNNNNNNNNNNNNNNNNNNNNNNNNNNNNNNNNNNNNNNNNNNNNNNNNNNCTAACGTTAACAACTACAATTTAAAATAATCTCTTCTCTCCTCTATTTCTCCTTAAGAGACTTTCATAATGTATGG(T/C)TGCTCATTAAGCATGTTATACACCACCAGTGGCGACGGAAGAACCTTTCTTTTGCATAAGCTTTATGTGCACATTTTTTTACCTTAATTTGATAAAATTATTAGTAAATTGATTCTTACAGTGTACATGTTTCAGTGTATCTTATAATAC
Unigene0004629	2662	A	-	C	TAATCCTCAGTTGCTCTCCATTAAATACAAGTACTAACCTGAGAGCCTGTTTAACAACTACCTGAGTTTGTTTTATAGAGATAGACGAAAACTGGAATCCATTAGAAATATCCACTTGTGAAATCATGTTTGCTTTGAAGACAATATTTG(A/C)GAATATGTCTAGTTCAATAAGTAATCACTTTAGCAGCAAATATAGTGTCTCTGGTGAATAACGATAAGAAATCAAACTGNNNNNNNNNNNNNNNNNNNNNNNNNNNNNNNNNNNNNNNNNNNNNNNNNNNNNNNNNNNNNNNNNNNNNNN
Unigene0005894	1325	G	-	C	TCCTTCACTTCCTACAAAGGAAGCTGTTTTGCAATTCTTACTAGAAGCAGCTGTAATATAACCTTATGATTTTTTCTTGAGATATAGCTTAGGGTGATATTTACTAAGCTTCTGGAAAAAAAATCTCCAAAGTTTAAATTCTTTTGACTT(C/G)TAACTTTTTTTTGTTATAAATTCGTGCTCTCGATTTTTTCTTGTTACCGATGAGTGCAATGAATGAATTTTTTAGTTTTTGAAAAAANNNNNNNNNNNNNNNNNNNNNNNNNNNNNNNNNNNNNNNNNNNNNNNNNNNNNNNNNNNNNNN
Unigene0006234	179	T	-	C	AATTTTTACTCTCAATCCTCTCTTTCTCTCACCGGTTTCTCTCACCATTCTGCCACTGCAAACCAAAACCCCTTTTTGTTTTTCATATGCAGAACAGAAGCTTCTTCTTTATTACTTATAATCTTGTAAGTCAGTTTAATTTCAATTTTG(T/C)ATCCATCTTTGACATTCTTCAGATCATAGTTTTTGATATAATAAGAATTTCTGAAGGTACAGAAAAAATTGATATTTGTCCACTGTGCTAGATTAGGTTAGATTATACGATTCAATGCGCATACTTGAATCCTGATGAGTAATCATGCAA
Unigene0006234	190	G	-	C	TCAATCCTCTCTTTCTCTCACCGGTTTCTCTCACCATTCTGCCACTGCAAACCAAAACCCCTTTTTGTTTTTCATATGCAGAACAGAAGCTTCTTCTTTATTACTTATAATCTTGTAAGTCAGTTTAATTTCAATTTTGTATCCATCTTT(C/G)ACATTCTTCAGATCATAGTTTTTGATATAATAAGAATTTCTGAAGGTACAGAAAAAATTGATATTTGTCCACTGTGCTAGATTAGGTTAGATTATACGATTCAATGCGCATACTTGAATCCTGATGAGTAATCATGCAATCAAATTCCAA
Unigene0006560	185	T	-	C	TACCAAACCTACAGTTTCATAAACCGAATTGATGATTCACTAATCAATAGCTTATATGGTATTTGATAATTGACAACATGGAATAAATTTGATCAAACCACCTTTAGAATAAATTTGAACTCTCCCTAATTCACTAAAGTAAATAATCTA(T/C)GTTGCTCACGTTCTTACTGATACTGTTTTGCAGACTCAAACTAAGTAGCAGTGTTTTCCAAATAAATTGGTTAGGAATGATACCCTTCTCTACCATTTCCAAAAATACCTGCATGCCTTTCTGAAGGTCCCCTTTCCTGCATAACACGTC
Unigene0007408	22	G	-	C	NNNNNNNNNNNNNNNNNNNNNNNNNNNNNNNNNNNNNNNNNNNNNNNNNNNNNNNNNNNNNNNNNNNNNNNNNNNNNNNNNNNNNNNNNNNNNNNNNNNNNNNNNNNNNNNNNNNNNNNNNNNNNNNNNGAGAAAATTCGATTTCCGCGA(C/G)GACGTGAAACCGACAATGGGAGCGTCCACGTCATCGGAGCCGAGGGTTCCGGCGGAACAGCAGGAGGCGGAAAACGTCGCAGCCTCCACCGGAGCTCTTCCTATACTTCAAAAAGCTTTCTCCAAGTTCGCCAATTCCGAAACAAACGCA
Unigene0007780	440	A	-	C	TGTTTTCTCTTATCTCATACTTTATGTTTAACCCTTTCCTTCTCCATCTCTCACATTCCACCTCCACCATATTCTTAATGATTGGATCTGTTGAATCATCAAGAACTTGAATAATAATTCTATCAGATGGCCATGATAACCCACATGCAG(A/C)TCCAATTGATAACTGATACACCTCTTTTTCATTATACATTGGGATTTGAACCAAAACCATAGGAAAACAAGAGTTTCCAAGCTCAATATCATGATCCATAAGTGGCTCCCATTTGTAATGTTTCTCTGGTTTATGACCAAACAGCTTAAG
Unigene0008130	107	T	-	C	NNNNNNNNNNNNNNNNNNNNNNNNNNNNNNNNNNNNNNNNNNNNAAGCTTTGTTTTTCGAATTTACCACTTTATATTAATGTTCGATTCGAATACGTGTGCAGTATGCAGTAGATAGTTTACCATTTGGAGGAGTAGGTGCGAGTGGATT(T/C)GGAATGTACCATGGAAAATTCTCCTTTGACACATTCAGTCACCAGAAAGCAATTGTTAGAAGAAGTTTCCTAACTGATTTTTGGTATAGATATCCACCATGGACACCAAACAAGTTTCAACTGCTTGAAGTCTCTTACAATTATGATTAT
Unigene0008145	152	T	-	C	TAACAGTGTATTTGATATAGAAGTTCAAATTTCAGGAATCAAACAGAGTACCGGACATTCTGAAAAGCACATACAGCTAGATTCTTCCGCAAGTACCGCATCATATTTTCATAATACTCGCTTTCTTTACAAAATTTACGAGCCAAACAA(T/C)TATTCCATTGAAGTCTCTTCTTTACGCAGTATTCAATTGTTCTTGAGATCCATTCTTCCTTGGAAGGAACCGTTTGTTGAAGTCGCCTTGGAAGATTCTCCCATTGACATTCATCCTTAATCGCTTTTTCCAACAACAGTTCCTCCACCG
Unigene0009406	45	G	-	C	NNNNNNNNNNNNNNNNNNNNNNNNNNNNNNNNNNNNNNNNNNNNNNNNNNNNNNNNNNNNNNNNNNNNNNNNNNNNNNNNNNNNNNNNNNNNNNNNNNNNNNNNNNTTGATTGAGATTAGCAGTTGATATTACACATAAATCGTAAGTAA(C/G)AAATTCCGAATTCGTTAAAATAACTATTGATTTTCTCACATTTATTTTTGGCTGAAAATGATTTTATCACTTTAGTTTACACTCTATTAACTTTTTGATGAGCCAAATTCAACAAAATTTACTATAAAATCAAAATGGGAAGAGATCAAG
Unigene0010791	484	G	-	C	TGCTTCATCTTTCTGTAGGAAGTCCATTTTGGGTCCAAGCAGCATAACCACCAGCTATGTCTGTGACTCCAGTGAACCCCTATACATATTACAAAACAACACGTATCGTAAGAGTGTCATAAGGGTGTCAGATGCGCTCGGACACTACGA(C/G)ACAGTGTCAGATGCGCGGCTTATTGAGAGAAGAAATGCTTACAGAAGTTAACAAGTCAGTAGCAGCCATCATAGACCTTTTACCAAGTTGACACCCAACAATAATTTCATCTTCTTTTCTAAAATGTGAAGAGACTTCTTTAACAAAATT
Unigene0010841	790	G	-	C	AAATAAATGCGGAACATTTAACTAGCATCTCTGATAATTAATCTACTAACGGTCGACAATCTAACAGCTCAATTCACCCGCATTGCATTTATGAATTAACTATGTAGCACCAACACTTCAGATTGAAGACGTGTTTGGTGTTTCACACAT(C/G)TTGGTTAGGACTCTGACGCAACATCAATACATGTAGTTATATTCAATCGTTTTCATTATTTTAAGTTATCGGTGTTTACATTTCTGCATTAGTGTAAGTGATTATGCATACCGCCTTCTCATTGGAAGTGCTGCAAACTGCAACATTGAC
Unigene0013249	175	A	-	C	ATCATACATTTCAAAAATGGAGAATGTTTGATTGAGATGGACGGTCGAGATTGTCGACGGTATAAATGTGTAGAAATAATTTATTCTCCACTATATATTGATTGATTCATAATGAATATTTAGTTTATGAGCCATAGAAACCAAATCCAC(A/C)AAACAACAACCTAGTGGTAACACTAGCTATACGCAATGTTGAAAAGCCAAACAGAATGGCCTGAGCCAATAATCAGAGTTCAATCTTTATCTGAAGGATGCATAGATTCAATTCCTGATAGGTATATCAAGCCTCCAACTGATAGGCCAT
Unigene0013583	37	G	-	C	NNNNNNNNNNNNNNNNNNNNNNNNNNNNNNNNNNNNNNNNNNNNNNNNNNNNNNNNNNNNNNNNNNNNNNNNNNNNNNNNNNNNNNNNNNNNNNNNNNNNNNNNNNNNNNNNNNGCATTGTTTAAATTCACTTCTTAAACATTCTGCGGT(C/G)TTGGTGCTGCCTCTCAGTAAGTACGATCTTAATAAATCTGGAAAAGCAGCTACTTTGGATATCCCTTTACCATTAAAGAATGCAGATGGGAGTATTGCTTCTGTAGGAGAAGAGTTAGGACTTTGTGAAGAGGAAAATTCGAAGCTGAAT
Unigene0013718	4534	T	-	C	ATTTTGAGAGAAATGGGTCTCTGTGGAAGGGTACAAATCGGAGAGTTTGGAGTTGGGCCATCTAATTGAAGGTGATGCTCTGCTATAGTTGAATTTAACAACCGTGACAGTTTTATTGTCATTGTTATTGGAATTGTTGTTGAGTTGTTG(T/C)GGAGAGGAATCTGTAGAGGAAATTGAAGAGGAAACAATAATAGTGCGTCTGTTTGAAACAGAAAGTGAGAAGGGTATGGGTGTGGAGGATGTAAGAGTGAGTATTCCAGTGGAGGAGACACAGAAATACATGACTGTTGTTTGGCTTTGG
Unigene0014101	121	A	-	C	NNNNNNNNNNNNNNNNNNNNNNNNNNNNNNGAACTCAAAATCTATCTCATCATGATGGCTTCCTGCGGAAGATAAATAGTACGCTGTGACTATTCCTGCGGAATTTCCAGGTATCATTTTGATTAACATTTCAATACTTCCAAATAAGAA(A/C)GATCTCTTCGAACGAGCAGCTGATCCTGAGGTTTTATCCAACACAAGGTGAAGATCTTCACCAACAATTGATGAATGTTGAACACCCCAAGTGAGGTACATGCTCTTTGAAAAGTTGGCATTCACCTGGATTATGTTGGGTAAGAATGCA
Unigene0014391	93	G	-	C	NNNNNNNNNNNNNNNNNNNNNNNNNNNNNNNNNNNNNNNNNNNNNNNNNNNNNNNNNNCTACAAAATTCAATAAATATGGCAATTATAGTTTATAAGAAATATTAGCCATACATAAATAATATTTAAAATCTATCTAATTATGAATCAAT(C/G)CGACGCCTTTCTTTCTTAGACTTAACAATCTCCATCTTCAACATTTCAAGTAAGAAATCATTCCATGTATCAATCGGTCCAGGCAAACACCAATGGACACAATCGTTATACAAAGTCACATTCTCTCCCGGCAAATGTCCATACTTACTT
Unigene0015073	1077	T	-	C	GTCATTTCTGAATAACTTGTTTGTACATGCAAAAGAGATACAAGTTTGAGAAGATAAAAGATTAATGGGACAAATGGAAACACTTGTGGTTTCTTGAAGGAAGTAGACAATTTTGATTGTGATAAACAGGGTATGAAATTCGAATAAAAA(T/C)GGTTTGATATGCGGAAACACTTATAATTTTCTTTANNNNNNNNNNNNNNNNNNNNNNNNNNNNNNNNNNNNNNNNNNNNNNNNNNNNNNNNNNNNNNNNNNNNNNNNNNNNNNNNNNNNNNNNNNNNNNNNNNNNNNNNNNNNNNNNNNN
Unigene0015483	84	G	-	C	NNNNNNNNNNNNNNNNNNNNNNNNNNNNNNNNNNNNNNNNNNNNNNNNNNNNNNNNNNNNNNNNNNNTTCGACATTAAAATACTATAATAACTCTTTTTACACCGTATATACCAGAAATAAGTAAACAAAAGCATCAAACAAGAATCTGT(C/G)ACAGAACTGATTATTGTAACTGCTAATCCAAGGCACACCACATAACTTCACATAACTTAGGTACCAAACTGAAGGAACAAACCAAAAAACAATATTTACACAGAAGTTGCTTGAACAAAATTTTCTTTGAAACCAATAAATTACACATTG
Unigene0020038	178	T	-	C	CAAAGAGGGCCTTAGTAAATACCGAAATTAGGACTTAATTAGGTCCAGGTTTTCTGATACTTCATGTTTTTTTTCTGCTGTTTATGTAACTGCCTTTCATAGGGTGGACATCCTTTTCATAATTATACAGCTAGATCCAAATACAGAAGA(T/C)ATATTCCTCGTCGATCGTCCCATTTAAAGCGTGGCGAGAGTTTAACAGCCTACAATTCAGAACACGAGGATAGTGACGAGGAAGAAAATTTTAAAACTGATGCCGCACTTAGAGAAAACATAGTCTGCCAAAACCAAAAGTCTTCGGGAA
Unigene0020427	1231	G	-	C	CAGGGAAGCCGTGGAGGAATACGACGACGTTTGGACCGGTTCCAATTTCAGCTATGTGAAGTTTGAGAGCTCCTACATTCACGAACTTGTGTTCAATTTCTTCCATCAATTACAGTGTGTTTCGTGTCTGGACTCTTAACTGAACTCAAA(C/G)TACTCTTCTAAACTGATGTCCACTATTTNNNNNNNNNNNNNNNNNNNNNNNNNNNNNNNNNNNNNNNNNNNNNNNNNNNNNNNNNNNNNNNNNNNNNNNNNNNNNNNNNNNNNNNNNNNNNNNNNNNNNNNNNNNNNNNNNNNNNNNNNN
Unigene0020442	57	T	-	C	NNNNNNNNNNNNNNNNNNNNNNNNNNNNNNNNNNNNNNNNNNNNNNNNNNNNNNNNNNNNNNNNNNNNNNNNNNNNNNNNNNNNNNNNNNNNNNCCCACACCTCAAAATCCACAGGAGCGATCAACATAAAAATGACTCAACAATAACAA(T/C)TGTATGGAAAATTGTTACTGCAATTTTTCCCATGCCACAAAAATCCACTGAAGTGCTTCAAAGTTCAAACATATGGATTGCAACAAAGCATAAAATTCATTCATTCCTAGGAAAATCCCAAACAGTATTACCATGTTCCCGGTTAGGGAT
Unigene0020895	1643	G	-	C	GTCCACAAGCCATCAGTTTAGTTCTGTCCCTGCTAGTTTTACTCAGGTCAGTCCGCGGTGATGCCGGAATCAAAGTAGTGTGTGAATTGCAGTTGATAAATAGATGAAAAGGGAAAAATAATCAAATTTCATTTTTAGCTTAATAGATTA(C/G)TTTTTTGGTCTTCTTTTAGTTTTCTTTTTTCCTTTTGTTTATCTATAGCAACGCTTTTCTCTCATGAGTTTATATTTTCTTTAGAGGCTCCTTCAAGAAGCATTTGAGTTTCTGTATCATATAATATTTNNNNNNNNNNNNNNNNNNNNN
Unigene0022392	45	A	-	C	NNNNNNNNNNNNNNNNNNNNNNNNNNNNNNNNNNNNNNNNNNNNNNNNNNNNNNNNNNNNNNNNNNNNNNNNNNNNNNNNNNNNNNNNNNNNNNNNNNNNNNNNNNTTTTATTCTAGTCTTACAGTTTTAGCTGTTGTCACTTGGCAAGT(A/C)TTGATTGTGGCTATACCAATGGTTTACGTTACAATTCGCTTGCAGAAATACTACTTTACCTCAGCAAAAGAAGTGATGCGGATGAGTGGCACAACAAAATCCTGCTTAGCTAACCATGTAGCTGAAACTGTTTCTGGAGCTGTGACAATA
Unigene0023001	1504	G	-	C	GATACAGAATGCTTTCCATTTTGATCATACCCTTTCCTCTGCACTGGATCACTCAAAACCTGATATGCTTCGCCCAAAATCTGGAACTTGTGTGCAGCATTAGGATCGTTTTGGTTTCTATCAGGATGAACTTGCTTTGCCTGTAACAAA(C/G)AAGTAAGCAAAATTCATAATAGAAAAAGGAAAAACAAGAAAATAATGATGGAACCTTTTGATAATAAGCCTTGCGAATTTGATCATCGGAAGCAGAGGGAGAGACTCCGAGGATATCGTAATACTCTGTTTCCTTCACCATTATCGATGG
Unigene0023104	993	G	-	C	ATACATGGATTTCCTAATTCCATAGTGTCAGACAGAATAACACTCTGATTCTAGTTGATTTTCCTTATCAGAAGTAATAATACAATGTGCTATTCCTACTATTTCTGTTATTCTCTATTAATTACCCTAATTTACCAAGTTGATCTCTAT(C/G)AACAACCCAGATGCTCCAATTCGGCGGCTAGGAACGGACCGCAATGTTTGCAAAATTTCCAACAATCATATCCCCGTGTATAAATATCATCATAACCCCATGTAGAGTTTGCTCTCAATTGGTCCAATTCTAAGATACAAAACCAAGAAT
Unigene0030481	350	T	-	C	ATTTAAAACCCATGCATTTCAGAAAAACTATGGTTCTACATCCCAAATGCACAAACAACCATTAATATGAAAATATAACAGTTACAGTCTCATCATTTACCAAACTATTGAGTTCTTTTTTTTAGTATAACGAACTCAGCAGCAGATTTA(T/C)AGCCATGAAACTAACTATATTTTATTCTACATATCTTTAACACAATATATTGCCAAGCCAAATAAATTCAGATTAATCTGTCATACATTTTTCAACAATGATCTAGACTACAATTCTCCAAATTCTACAGCGCCTCAAAATTATTTATTA
Unigene0030847	20	T	-	C	NNNNNNNNNNNNNNNNNNNNNNNNNNNNNNNNNNNNNNNNNNNNNNNNNNNNNNNNNNNNNNNNNNNNNNNNNNNNNNNNNNNNNNNNNNNNNNNNNNNNNNNNNNNNNNNNNNNNNNNNNNNNNNNNNNNAGGAGAAGGTGGTTTTGGA(T/C)CAGTGTACAAGGGCATATTGGTAGATGGCCAAGAGATTGCTGTTAAGAGGCTATCTGAAACATCAGGACAAGGAAATGAGGAATTCAAAAATGAAGTAAAATTGATGGCAACACTTCAACACCGAAATCTTGTAAAACTTCTTGGTTGCT
Unigene0031193	178	G	-	C	GCGGATCAATTTCTCATGAAGCTTTTGCTTAGAATTTGAGGTTGTTATAGAAGCCCGGCTCCTTTCTCGTCTGGTGATCATTGTTCTTCCACTTGTTTTGAAATAATTCATAGTGATGTATGGGAAATGTCTCTTGTAATTTCTCATACT(C/G)ACTATAAATATTTTGTCACATTTACTGATGATTATAGTCGTTTTACTTGGATATATTTTCTTCGATCTAAGTCTGAAGTGTTTTCTATGTTTTAGAAGTTTTTGACATATGTTGAAACTCAATTTCAAGCAAGTGTGAAAATTTTTCGAT
Unigene0031756	1038	T	-	C	TCTTTTTCTGATAATGGAAATCCATGCTGAATCTCTCTCTTGTTATATCATCACATTCTGCACTAACTAACTTATCAAGACATGCGTGATGTGTCACTTTAGGATACCAATAGAGTGCATTCAAGATAAATATGTTGTTTTGAAAACCGG(T/C)GCTTAATTCAAATAGCCAAAACAATAGAGTCAAGTGTTCAGCTTAGATCCATCTTCTGTAAAAACCGTAGATTTGTGCATTATTGTACATTTGCACCTTGACATGGATCATGTACTGCTTCGTTGATTGAAAGCCTTGTAGCAAAACATT
Unigene0033653	37	T	-	C	NNNNNNNNNNNNNNNNNNNNNNNNNNNNNNNNNNNNNNNNNNNNNNNNNNNNNNNNNNNNNNNNNNNNNNNNNNNNNNNNNNNNNNNNNNNNNNNNNNNNNNNNNNNNNNNNNNGTCTGTTTCATTTCATCTAAGAGTTTGTAAGCTTCA(T/C)CAACAAGGCCATTTTTGAACAACATTGATTTATCAAAACCTCTACTGTACTTGGCCCTAAAACATTAAGCTTACAATTTTCAAAAAACATTGTAAAATAAATTTGAAGTTAATAAAAAAGTGTACTTAAACTTTACCATACATGTTTTCT
Unigene0034263	23	T	-	C	NNNNNNNNNNNNNNNNNNNNNNNNNNNNNNNNNNNNNNNNNNNNNNNNNNNNNNNNNNNNNNNNNNNNNNNNNNNNNNNNNNNNNNNNNNNNNNNNNNNNNNNNNNNNNNNNNNNNNNNNNNNNNNNNGGAAAATTCAACATGTAATGTT(T/C)TGGAATAATACAATTGAACTAACATCATCCAAACATGTATATTCACCGTCCATTCAAAATTGCAGGCCCAATCAAACATTTTGAACAGAATTTGACACACAAAACAGAATTTAACACAGAACAGGAAGATTAAGGGTAGAAATAACAAAA
Unigene0038811	122	T	-	C	NNNNNNNNNNNNNNNNNNNNNNNNNNNNNCTGCGGCATGTTGAAGATGATTCAACAATAATGTGGGCGGTAGGACTCGATTCCGGGGTTATTGCAAAGCGAGCACAAATTTGTGGCGACGAAATTGAAATGGTTGTCCCATTTGAAGGTG(T/C)CAACTTTGGAGAGTTGAAGGTGAGCATTGTAGTAAAAGAGTGGCAATTTTCTGATGGAACGCATAGCTTGAACAAACTCCGTAACAACTCTCAGCAGTCGCTAAATGGATCGTCAAATCTTCAGTTAAAAACTGGAAAGAAACTTAACAT
Unigene0040522	109	A	-	C	NNNNNNNNNNNNNNNNNNNNNNNNNNNNNNNNNNNNNNNNNNCTCAACTATAAATATATTATATTTCAAAGCAATTTTAGAAAATAAATACAGAATTAAATTTTTGAATAAATCGTGTGTACTCTTATCTCTGGTGGAAGAAGTAAGAAT(A/C)ATTCTCATTTATTTCCTTAAAAAATAGTAGTGATTTCTCTTGCTTCCTCCACTGCTAGCCAAGTCACTCCGTATGGTTCATTCCGTGCAAGTAGCGCCAAGCATATGTTAAATTGTGCAAATGACACTGTTAAATATTTTCTCAAAATCC
Unigene0041259	26	T	-	C	NNNNNNNNNNNNNNNNNNNNNNNNNNNNNNNNNNNNNNNNNNNNNNNNNNNNNNNNNNNNNNNNNNNNNNNNNNNNNNNNNNNNNNNNNNNNNNNNNNNNNNNNNNNNNNNNNNNNNNNNNNNNNTTTGTAGTTGCTGGTTGTGATTGGC(T/C)AAAGAATATGTGGCACCTACATACATGGCCTTAGCCCCTTATCCACTTAACCAAACTATCGACAGTTGTGGTGCTCGTTTAACATTTTAAAAAAACCAAACAAAAACATCATCTTATTATTACATTCACCTCTCATTCTCAACCCAACAG
Unigene0041415	83	T	-	C	NNNNNNNNNNNNNNNNNNNNNNNNNNNNNNNNNNNNNNNNNNNNNNNNNNNNNNNNNNNNNNNNNNNNTAGATCTAATTGCTCAAAAGTATCTTGCTCTTTTCATGTCCATCCATAAACAAGAAAAAAATGAGGAAAACATGAAAAGTAC(T/C)GTCATTTTAGAGAGATAGAGGGAAAGGCAGAGTGCAGTTCCCACACTTAAGTCAGAGGATCCTCCTCCTAGAGTGATCCTTGAATAAAGGCTTGAGAAAATATTATCGAAACAGATGCTAAATGAAGAGATATGAAATTCACCATTCACC
Unigene0041661	49	A	-	C	NNNNNNNNNNNNNNNNNNNNNNNNNNNNNNNNNNNNNNNNNNNNNNNNNNNNNNNNNNNNNNNNNNNNNNNNNNNNNNNNNNNNNNNNNNNNNNNNNNNNNNGCTCATTGTTGTATGTTCACGTACACATCCATTCTCATTAGTTCAATG(A/C)GTATCATTCGTTCATTTACATAACTTATTTTTTCTTGCATAGTCTATATCCCGTTATAAATCTGTGAAACTGAAGTCATTTTTTCTTCCTAAATGGCAAATGAAATTGTAGCTTAACAACTCGCACTACTAAGTTTGAGATGGCACATAT
Unigene0041903	786	T	-	C	GTCAACACAGTTCAATGTACAAGTTGTAGTCTTCTGAATTGGTGGTTGTGATCACGAGAATATTAAACCGGGTTCGATTCTGTTTACATTGTATAATTTCCTGCATTCAATGTTTGATTGATATCTGCTGTTGATGTATATCTTAGTAAG(T/C)ACGTAATATTGTAGACATTGCAAACCATTTAGTAATTTGTCATATCTATTGACTTGCATGTGANNNNNNNNNNNNNNNNNNNNNNNNNNNNNNNNNNNNNNNNNNNNNNNNNNNNNNNNNNNNNNNNNNNNNNNNNNNNNNNNNNNNNNN
Unigene0042106	50	G	-	C	NNNNNNNNNNNNNNNNNNNNNNNNNNNNNNNNNNNNNNNNNNNNNNNNNNNNNNNNNNNNNNNNNNNNNNNNNNNNNNNNNNNNNNNNNNNNNNNNNNNNNTTGCAAAAGAAAAGGAATTGAGTTCACTTGTATTTCCTGTTTTGAAATG(C/G)ATTATCTGATTAATTAATTACAACCCGTGGTTTAAATAAAAAGCGATACTACTACAAAGTTCCGAAATCAGCGATGGACAAAGGCCTTTAAATTCCCCTTCGCACAAACATAATCACAATTTATTTTCTTCCAGAACCTTTCTCATCACA
Unigene0043413	2430	T	-	C	TCTTCACAAGAGGTAGTGACCATTTGTTTATTTATTTATACTACTGGGTAGGTGTATAACGACCCCAAACAGCTGGATGGATAGGTTGACTGCATCACATAACTTATTTGTATAATTTAATTTATTTGTATAATATTAGAATTATTTAAG(T/C)AGTGTATCTTATTTAACGATGTTTACTCAAAAGTCCAATCTCTGCTATTTATGTTTTGATTATCTAAAAATACAATATATCCATTCCATTTTAAACGGAGNNNNNNNNNNNNNNNNNNNNNNNNNNNNNNNNNNNNNNNNNNNNNNNNNN
Unigene0043665	60	T	-	C	NNNNNNNNNNNNNNNNNNNNNNNNNNNNNNNNNNNNNNNNNNNNNNNNNNNNNNNNNNNNNNNNNNNNNNNNNNNNNNNNNNNNNNNNNNNCCACGTTTCATTCTTAAATATCAATATTACAAACTAAAAAAATATCTATACAATTTCCA(T/C)GGTTGGTAGTAATCTAGAAGATAAAAATTTCCCAAATGAATCTTTCAAGTGTTGATAACAAAAACAAGATGTTATCTTCTACATAGAAGCAACAGCTATAACTTCCTATAGACAAAACGTGAAGAAGAAAAAAAAAGGCAAAATCACCAA
Unigene0044131	2630	G	-	C	ACATTTGTGCATAGGGGTCGCTTTGTCAAGTTTCAATTTGTATCATCTGCTGCTGTTTGATGAAGTGATGTTTACTTAGATGAATATTTTTGTACACCCTTGTTTCATGCTTGTTCAATCTTCTATCAAATTATGATAAGATGCATTAGA(C/G)TGGAACATCCCTTAAGACCGGTTCTTGCCATTGACACATCTGATGTCACTTTATTACTACTGAATTATGCCCTGTGTAATCAGGGTGAGAAGAACAATGAGAAACTGGACTTGTCCTATTAAGAATANNNNNNNNNNNNNNNNNNNNNNN
Unigene0044640	63	T	-	C	NNNNNNNNNNNNNNNNNNNNNNNNNNNNNNNNNNNNNNNNNNNNNNNNNNNNNNNNNNNNNNNNNNNNNNNNNNNNNNNNNNNNNNNNACAATTATAATTTTTTTTGACGGATTGATAAATAAACAATTTTTTAAAATCTGAAAATGCTT(T/C)AATAACTTGTTTCCGGGTGGTGCTAACGGCGTCGCTAGAGTCCCTATTCTCCGTCGTCTTCTTCTTTCATCACCACCGCGACGCTGATTCAAATTGGATCCGATCCAGCGTTTGAACGCATCATCAATGTCAGGGGCAGCTTCTGCTCTG
Unigene0045057	20	G	-	C	NNNNNNNNNNNNNNNNNNNNNNNNNNNNNNNNNNNNNNNNNNNNNNNNNNNNNNNNNNNNNNNNNNNNNNNNNNNNNNNNNNNNNNNNNNNNNNNNNNNNNNNNNNNNNNNNNNNNNNNNNNNNNNNNNNNTTTCAAAACCGTAAAATAG(C/G)ATAAGGTTCAATAAACATTGGAAAGAGACACTTGCCTTTCATAGAAATAAACTTTGGATCTATTAGTCACTTATGCTTTTACATATTTGATATTTAAAAGCCAAAAATAAACTTTGAAACTACTAATATGATAGAATTCCACTGGCTAAT
Unigene0045144	72	A	-	C	NNNNNNNNNNNNNNNNNNNNNNNNNNNNNNNNNNNNNNNNNNNNNNNNNNNNNNNNNNNNNNNNNNNNNNNNNNNNNNNGGAATATATAATTTGTCTTTCCATTACAAAATCAATTAGGTTTTCTAGTTCATGTGAAATACCCAAAACCT(A/C)TTATAATTTGGAAGAGGGAGTAAGCCACTTCTCAGTAACTTGGACTACCAAATACACAGCACCGTAACCTTTTTACTTTCGGTGTTCATTACATTTCCTAATTGCTTACCTACAAGTGATTAAAGAAGTGTTGCAGATAAATTCACATGC
Unigene0045552	1019	G	-	C	AGTAATTTTGTTTAATGCTAGAAATATAGCATTTTATTCTTTCTTCCAAGTTATTTTTATAAAATTTCTATTTAGTGAATAGCATACAAAAGTTTGTGATGTGAAATTTGAATGGGATTGGATTAGACACTTTGGTTAGTCTTCCAAATT(C/G)TCAAATAAAGATTCCAAGCTCTCGAAGTGTTGTTATTATTGATTCTATTCTTTGTGGGTTTTAATTCTGAANNNNNNNNNNNNNNNNNNNNNNNNNNNNNNNNNNNNNNNNNNNNNNNNNNNNNNNNNNNNNNNNNNNNNNNNNNNNNNN
Unigene0045557	55	G	-	C	NNNNNNNNNNNNNNNNNNNNNNNNNNNNNNNNNNNNNNNNNNNNNNNNNNNNNNNNNNNNNNNNNNNNNNNNNNNNNNNNNNNNNNNNNNNNNNNNGTGCTTTTAATTCCATTCATCACTTTTTCTCTAAAATCCTCTATGGCAAACATG(C/G)CCTTGCTAACTTAGTAGAACTCTTCAACAACATAACATGCTTAAAATAGACACGGAAACAACACTGGTGGATCAAGTTAAACTACTCAACCGATAGGTCAAAAAGGTGTCCCTAGAAGAAACTATTGTGCTAACTATATTTCCAAATCAA
Unigene0045590	114	T	-	C	NNNNNNNNNNNNNNNNNNNNNNNNNNNNNNNNNNNNNATTTTCATATCATACAAAATTTCCAAAGTCTAAAATGCAACTTTAGTTTTGGAAACAAATTAAATATAGACATATTCCATTGTCGCATTATCAATTTATCACGTGAACTCCAA(T/C)ATTCTCTTCTTTCAACGTAAATATACAACCAAAAAAAACTCTTATTCCTAAAGATCCACCCAAAACACAGGTTCGGAAGATGGAGAAGCTGGTGGAAGTGTGCGAACCAGCTGAGGTTCGGATAGAATTCACACTCAACACCAAATGCCG
Unigene0046245	6875	G	-	C	TATTTTCTTCTTGGCTAGGATTTGTATTCTAGTTGTAGTTTGATCATGCAGAGAGCAGTTGTATCTATGGAGCAGTTTTGTATCGAATAATTATAATTTTTTTTTCAGGCCATTGGTTATGTTTTGATCAACCCTCGTGGTTCATCGTAT(C/G)ATTGATTGAAAGATTTTAGCCTTAATGAAATTATGGTTGAAAACCATTGTGGCTAACTATTTCATCTGTATCTCTGTTGATTTCTGTTGAGATTTTTATATTCGGCTCTTCTAAAGTGAGCATTGGTTTTNNNNNNNNNNNNNNNNNNNN
Unigene0046586	1641	T	-	C	TGTGATAATTAACTATCTTTATCTTTATGATTCTGAGTTTTATATATTATAAAATCGTAGAGAAAAAAACATGTGGGTTGGTTGGTAGTAGCTGTGTGTATAAGACTTTATTCATGTATGTATGTACCTAAGAATAATCTATAATAATAA(T/C)ATGATTCACACCTTTCTTATTCTAATGTATCTATCTATAATATAATCTATAAGAAACTCAGAAAGGAACTTGACGATGTTTCTGTTTGAAGATTCGTTTTCTAGGAGAGAGNNNNNNNNNNNNNNNNNNNNNNNNNNNNNNNNNNNNNNN
Unigene0047181	902	G	-	C	TGAAGAATTCAAACTTGCTTGGGGTGATCATGGACAAAAGATTGCTAAGTTTCAAGTATATTTGAGAATTGGAAAAGTAAGGGATGCTTGAAAATATGCCAAATGATCGAGTACTGTGCCGTAACATGTTCTTCAATAGTAAATTTGTTA(C/G)AAAATAATATTATTGCCTTAGTTCTTGTCTTAGTATTGTAACTGATAGTGTTGTCACACTATTTTGTCCATTTACAAAATAAGATAGAGCTCTTAATTTGGTTCTCATGTTAAAATTGNNNNNNNNNNNNNNNNNNNNNNNNNNNNNNNN
Unigene0048715	661	T	-	C	CTAATGCACTTTATAAAGTTCTCAAAGTTAGACCTGGAACTGTCCCTATTTGTCATTTTATTGGCAACAAGGCTATTGCTTGGGTTCCTAATGATAGTGTGAGTGAGGATGATGATTGTCCTCGTCTCATTTAATCAGTCTCTAGTTATG(T/C)ATATTATTTCTGTTATATATTACTTTTTACATTAAAATCGAGTACAGTAGTTATAAATTTGCACCTTCATGGTAAACTCATGNNNNNNNNNNNNNNNNNNNNNNNNNNNNNNNNNNNNNNNNNNNNNNNNNNNNNNNNNNNNNNNNNNNN
Unigene0049359	118	T	-	C	NNNNNNNNNNNNNNNNNNNNNNNNNNNNNNNNNAAATGAAATTATATTAAACACAACTAACTCGAAATTTATTGAGAAAATGCCTCTAGTTAGTCATCACTAACTAGCTAACATATCGTAACCACATAAAAAACAATGAAAATGACAAAA(T/C)TGAATCACATAGATTCATAACATTTGAAAGACAAACAAGGTTTAACCAAAACCTCAAGTGGAGTAGCTTTAGTGGTGACAAATTCAAGAACTTCAGTCACATCAATTGATTCCGGAGATGGATTCAAGATTTCAAAAGAATGCAAAAAAT
Unigene0049359	1361	T	-	C	CATATTGCGACGACATTTGATTTGACCAAACATTAACAAGTTCTTTGATCGATGTTTGAACTTCAGAGACACGAATGTGACTCAGTAGTTCAATTCTTCGATTAGAGAGAATTTCTAGGGTGACAATTTTCCTTAATTGGCGCCAATATG(T/C)ACCGTATGGTGCCCAACCAATGAAAGCTTGATTATACGACATAAGCTCAACCGCGACTGGTTTAGGGCGTGACGAAACGACTATGTCGTTTTTGGTAAAACATTCTTTGGCTAATTCCCAATTACTAAGTACCAAAGCATTTGTAGCACC
Unigene0049695	158	A	-	C	ATAACACATTTCCATTACTACATGAAAATGTGTGTTCAAATACAATTCTACAAAACATTTTAAGTTCAGATGCTTTAAGATTGAGAGAGTGAGAGGTTACAGAAAAATATCATACCAAAAACTGCATATCCTATTCCTACTTTCATGTTT(A/C)TCACAATGTACTTTCTACCTAAAAAATAATGATAAGGAGGCTAAATTTCTATTTCTGCAGCTAAATATGCAACACATTTCAATCCATCTAAAACATCTCAGCTAGAAGAAGATACCTTAACAGCTTTAAAAGTAGGATGAAGCAAACCAA
Unigene0050280	219	T	-	C	ATCAGTTTCTGATTGTACACTTTGGTTATTCTGTTGTTGGTGCTCTCTTGCTCAAGAAACTAGGACTGGGAATAGTTATGATATCTTGGAAGACAAGTTATGTTTGAAAGAAATTGATACTTGTGATCAAGTTTCAGTTTCAACTTTGGA(T/C)AGAGAAGATGTAGTAGTATCAACCAAATCTGGTACAAGTTTTACTCTGGAAGGAGGTAAAGATGGAACAATGACTCCACCAACTCCGTCATCAGTACAAAAAGAAGATCATTAGTTAATCTATGAAAGGAAAAGAGGGAAATGATTCTTC
Unigene0050308	93	A	-	C	NNNNNNNNNNNNNNNNNNNNNNNNNNNNNNNNNNNNNNNNNNNNNNNNNNNNNNNNNNTGGACATTCCATTTGCGCACAATTGGAGATATAAAGTTTACAACAAACACACTATACCTACTTTTCAAACCAGAAAATCATTATTTTTCTTC(A/C)TTATTACTAAAACTATCAAATTTAAAACATCAACTTGAATACTCCACCAAATCATTGACCAATTACAACAACTTATCACACGCTTCCACTAATAGAACTGCTATACCCAGTCTGCAAATCATAGAATCTAGACCAAAGCATCACTCCTCC
Unigene0050308	103	A	-	C	NNNNNNNNNNNNNNNNNNNNNNNNNNNNNNNNNNNNNNNNNNNNNNNNTGGACATTCCATTTGCGCACAATTGGAGATATAAAGTTTACAACAAACACACTATACCTACTTTTCAAACCAGAAAATCATTATTTTTCTTCATTATTACTA(A/C)AACTATCAAATTTAAAACATCAACTTGAATACTCCACCAAATCATTGACCAATTACAACAACTTATCACACGCTTCCACTAATAGAACTGCTATACCCAGTCTGCAAATCATAGAATCTAGACCAAAGCATCACTCCTCCATACTTTCCT
Unigene0050612	108	G	-	C	NNNNNNNNNNNNNNNNNNNNNNNNNNNNNNNNNNNNNNNNNNNTCTGATGATCCTGATTTGGGTGCTAATACTCCAAAGCATTTTGTGAAAGATCTTCCTACATCTCATGAATACAAAGATGATAAGACCAATGATTTATCCCTTAACAA(C/G)ACAGATGGTTTGGCTATGGCTGATCTTACTTCTATCAACCCACAAAATAGTCTGAACTCATCACCTTTTCAGACTTCTGAAAATTTCAAAGATAAGAAAAATGAGAACTGGGCAGCTTACCTAGCTCCAGAAAGATTTAGAAGCCGCTGG
Unigene0050666	942	T	-	C	ATGTTATTTCAACACAGGTGTTATGGTAATGGATTTGGTGAAATGGAGAGACGGCGAATACACGAAGAAGATTGAGAAATGGATGGAGATTCAGAAGGAGAGAAGGGTTTATAAATTGGGATCATTACCGCCTTTTTTGATGGTTTTTGG(T/C)GGTGAGGTTGAAGCTATTGATCATAGATGGNNNNNNNNNNNNNNNNNNNNNNNNNNNNNNNNNNNNNNNNNNNNNNNNNNNNNNNNNNNNNNNNNNNNNNNNNNNNNNNNNNNNNNNNNNNNNNNNNNNNNNNNNNNNNNNNNNNNNNNN
Unigene0051322	118	G	-	C	NNNNNNNNNNNNNNNNNNNNNNNNNNNNNNNNNAAAATCCAGAGCTGAGGCCCAGTGTATGTATAGTTCTCCTTTGACCTTGAATAATGCAATTCAATGTATCGGTGCAACATCTTGCACCATATTAGTATTTCAGTTTTTTGATCGAAC(C/G)CACCGTCTAATAATGATCATTTATGCTATCATCGGAAAAACAACCATGGAATTTAACCAAGCATCCCTCAAATTTTGAGTCAAGAATACATGGTCCCATAACATTCATTCTTCTCATTTTCTTTTCTAAACTCTGGGTAGATATCATGCT
Unigene0051779	1538	T	-	C	CTTGCTATTTTAAATCAACAAACAAATCAGGAGAAAAAAAATATCTGTTACCAGGATCCAAATATTTCTAAGCAAAATGAGTGGAAGAGGATAGTTAATAAAACTTTAAGAGAAAACAGGTTGTTTTTTAAGGAGGGAAACAGATGTAAA(T/C)ATGTCAAACAAGAGAAGATGGATTGTATTTTTCATGAGAAGGGAATAAAAAGATTGACGTTTCATGAGTTTGTCAAGAAAGAATTGAATTCCATCAGGATGCAGATGAGGACATTTGCTGTGCAAATGTGTACTCATTTGCCAACTTCTT
Unigene0052805	290	T	-	C	TTAGCCATGAAAAATCCACAATCCAACCATATAACCTTGCCCTTAACACAATGTCAAATGGTAATATATATATTTACACTACCATACTATATATATCTTATCAATCATCATGAGAAGAAATCTATAACCAAGTAACCAAACTAAATCAAG(T/C)GGGCGAACGGCCTCCGCCACCACTGCTTCTAGAGTTCTATCTCTATTCTACTAAATAAAGTTTTATGTGAGTTGCACTTCAGAGACTCATCAGAATCAAAACAGGTCTAACAAAGACACTTACGCATGTCTTAAGGTCTTTAGGTTTAAA
Unigene0053046	1747	G	-	C	CATTGGGTTGACCCTGGCTGACATAACCAGCCATAAGCAAAGACCAAGATACAACATTTCGGTGAGGCATTTCGTCGAACAGTTTTTGTGCATGGTTGATTCTGAGAAGTTTGAGATAGGAGTTAATGAGATTGTTGGTGGTAAATGTGT(C/G)ATTTAACAAACCAGATTTGACAAAGTTGGAATGAGTAGGGGTTACAATGGTTAAATCCCTCTTGGTACTGAAATGGAAAGAGAAATGGTGAAGGCGAGAAAGAGAAAAGCTAGAAGAAGAGGAGAGGGATTTTAGCAAATAGGGCTTCAT
Unigene0053086	45	A	-	C	NNNNNNNNNNNNNNNNNNNNNNNNNNNNNNNNNNNNNNNNNNNNNNNNNNNNNNNNNNNNNNNNNNNNNNNNNNNNNNNNNNNNNNNNNNNNNNNNNNNNNNNNNNAGTTTTCTCATCTTCATAAGCTAAATAAAAACTAGATAATCTTA(A/C)CTCTTAACCATGGTTCTTTCACAAATTGACTATTTTTTTGCGGAGGAGACATCAACTTCTCCCTTGTTTGGTTTCATAGACCTTTTCCTAGGTTTAACATTTTTCAACAAAATCCACAAGTTTTTCTCAAGTTTATGGTTTTTCCTTTTC
Unigene0054279	1433	G	-	C	CAATGGCATACTGATGATTTCATTTAACAGAATCTCTGGCTGGATATGGTGTTCATTTAGGGCGTCACAACAAGTTTGAACGATTTATCCAGCAGATTGGTTTACAACAATGAGCTTGTGCTTGAAGGTAATTCATTCTGATTTTACACT(C/G)TCTAAGCCTATCAACCATGTTCCTGTATGTCAACTACATCTGTAATGACAAGGATTAAAGATCTGTCAGCATTTTAGCAGCCCACACATCAATATGGATCACCAACCATTGCATAGATAGTAAAATGTTCTTGACGCAGTGGATATCAAT
Unigene0054801	1773	T	-	C	CTTGTTTGGTTGATCTATTAGGACGTGCCGGCCGTGTAGACGAGGCCTATAATTTTATCAAACAAATGCCAATTGAGCCAAACGAAAGAGTTTGGGGGACACTTCTTAGCTCTTGCAGGGTATATTCAAACATGGATATTGGACTTTTAG(T/C)AGCTGACCACTTACTTCAATTAGCTCCTGAGCAATCCGGTTACTATGTTTTGTTATCGAATATTTATGCAAAGGCTGGTAGATGGAAAGAAGTAACGGATATCCGATTAGTAATGAAGAGAAGAAAAATTCGGAAAACTCCCGGCATCAG
Unigene0055518	318	T	-	C	AGTTCATTGTTCTGAAATAACTTGGCCTCGCCTCGATCTTACCAAGTATGGTTCTCTAACATTTCAAGCACCGGACACCAAGAAGTTTCCGTCCGTGAATCTTTGCTACGCTGCTGGACGAGCCGGAGGCACCATGACCGGAGTTATCAG(T/C)GCTGCAAACGAGATAGCTGTAGAACTGTTTGTTGCAGAAAAGATTAGCTATCTAGATATTTTCAAGGTTGTGGAGCTNNNNNNNNNNNNNNNNNNNNNNNNNNNNNNNNNNNNNNNNNNNNNNNNNNNNNNNNNNNNNNNNNNNNNNNNN
Unigene0055805	108	T	-	C	NNNNNNNNNNNNNNNNNNNNNNNNNNNNNNNNNNNNNNNNNNNATCGTCACACAAACAACACATCAGAACATAATCTTTCGAGAAAACAAAAACAACAACTTCCATTTTAGTGATGTCAATGAAGAGACAAAGAAGCAACGAAGGAACAG(T/C)AGACAACATAGATTTAGCAAACTGTTTAATGCTACTCTCTTGTCCACAACAACAGAAAGCCTTTGAAAACGGAGTATACGAGTGCAAAACATGCAACAAAAAATTCTCATCTTTTCAAGCACTTGGTGGCCATAGAGCTAGTCACAAGAG
Unigene0059013	122	T	-	C	NNNNNNNNNNNNNNNNNNNNNNNNNNNNNGCACTCCCGACACTCGCCTGGATTGGGACGTGTCCTATATTTGTAGCAACGATGTCCAATTCAAAGGCACGGGCAACCCCGACACAGGTGAGGATTGGCCAGGTGCACCCGACATCGATCA(T/C)ACGAATCCAAAAGTACAACAAGAACTATCAGATTGGATGAACTGGTTGAAAACAGAAGTTGGATTTGTAGGATGGAGACTAGACATGGTTGTCGGATATGCTCCAAGGTTTTCAAAAACCTACGTGGAGAAAACATCACCTGATTTCGCG
Unigene0061224	188	G	-	C	GCATTTATAGAAGGTCCAAGAATCGGCCGGTTCGACCGAACCGGTCGTTCTGTTGCTTTAAAAGGACATAGCGCGTCTTTGGTAGTGTTAGGTTCGTTTTTACTATGGTTCGGTTGGTACGGGTTCAATCCCGGTTCGTTTTTGACAATT(C/G)TAAAAAACTACGGAGATAACGGAAGGGATTATTATGGTCAATGGAGTGCTATTGGAAGGACAGGTGTCACAACGACATTGGCTGGATGCACTGCGGCTTTAACGACTCTGTTTAGTAAACGGTTATTAGACGGACACTGGAACGTGATTG
Unigene0062358	739	T	-	C	AGAAATTCTATGGTCGACGGCTAACCCTGGAAATAGTACTGTTAGTGGCCCTGTCAGTGTGGCAAATAAGGTTCTTTTCGGTGGATCTACTGATTTATCTGGACACTTATATGCAATCAATGCAAGAAATGGCAAAATTCTATGGTCTTA(T/C)GCAACTGGAGGTAGCGTCTATGGAGGAATGTCAATCAACAATGGATGTGTTTATTCGGGTCATGGATATAATGTATCTCTAGGAGTTTTCTCTAACTACACTGGTGGNNNNNNNNNNNNNNNNNNNNNNNNNNNNNNNNNNNNNNNNNNN
Unigene0063788	87	A	-	C	NNNNNNNNNNNNNNNNNNNNNNNNNNNNNNNNNNNNNNNNNNNNNNNNNNNNNNNNNNNNNNNNAACATGTTAGGGTGGAGACCTTGGAAAACAAGAACTCCTAGTACTTTGTCTATCGTGGAACTTAAGGTGCATATGGATTGCCAAGG(A/C)TGTGAAGAAAGAATAACAAGGGCCATCTCCAAACTAAATGGTGTTGATAGTATGGAGATAGACATGGAAAACCAGAAGGTAACAGTTAGAGGATATGTAGACAAAAGTAAGGTATTGAAAACTGTTAGAAGAACAGGAAGAAAAGCTGAA
Unigene0063788	342	T	-	C	AAGTAAGGTATTGAAAACTGTTAGAAGAACAGGAAGAAAAGCTGAATATTGGCCATTTCCTTATGATAGTGAATATTATCCATATGCTTCACAATATTTGGATGAATCTACATTCACATCTTCTTATAACTATTACAGACATGGTTTCAA(T/C)GAGAGTGTTCATGGATATTTTCCTGATCAAGTTTACTCAACTGTTCCTGATGAAACTGTTTTTCTCTTTAGTGATGACAATGTTCATGNNNNNNNNNNNNNNNNNNNNNNNNNNNNNNNNNNNNNNNNNNNNNNNNNNNNNNNNNNNNNN
Unigene0066174	39	A	-	C	NNNNNNNNNNNNNNNNNNNNNNNNNNNNNNNNNNNNNNNNNNNNNNNNNNNNNNNNNNNNNNNNNNNNNNNNNNNNNNNNNNNNNNNNNNNNNNNNNNNNNNNNNNNNNNNNTTCTTCTTCTTGCATGCTATTTTCCTTTTAACACCCCC(A/C)AAAAATGTCTTCAGAATTATCACACCATAATATCCAAGGTCTAACACAAGAAGAATTCAAAGAACTCGAACCAATCATACAAAAATACCACATATTAGAACCAAGCACAAACACATGCACATCAATCATAACCTACAAAATCGAAGCACC
Unigene0068947	119	G	-	C	NNNNNNNNNNNNNNNNNNNNNNNNNNNNNNNNTGCCAGAGAGAGGGCTAATCATCTTGCTTTGTTGAAATATTTGGAAAAGGATATTGTTAATGTTAGCATGCCTGGATCGTCAAAACCCGTCGAAAAAGATACTAATTCAAGCGAATCT(C/G)AAATAAGTTGGTTGTATGTAGATAAATTTTATGAAGAGCTCAAGAGGGGAAGTTTCAAAGTGAGAATCTCAGACGAGACTTTCGCTTGTCCATACTGCCCGAAAATGANNNNNNNNNNNNNNNNNNNNNNNNNNNNNNNNNNNNNNNNNN
Unigene0070454	29	G	-	C	NNNNNNNNNNNNNNNNNNNNNNNNNNNNNNNNNNNNNNNNNNNNNNNNNNNNNNNNNNNNNNNNNNNNNNNNNNNNNNNNNNNNNNNNNNNNNNNNNNNNNNNNNNNNNNNNNNNNNNNNNNGGGTTCCAAGAACCAAACCAAAAACCGC(C/G)TTTCATAATAACCTGCATCCCGCTTTTCGTAACGGACGTTTACCGCTTAAAATGTCGAGCAAAACACGCGCGATTTATGAATCCGTTAGTCGGAGAAAGCTTCTTCAGAGTGATCAAGTTGGCGAGAATGTTGTGGTGAGAGATATTGTG
Unigene0072441	145	G	-	C	NNNNNNATCGGAGAATTATTGCAACATATTCACAATAATTATGTTCAAAATGGAACAATAATTCTCAATTTTAACGAAGATCTTCATTCTATTGCACTTGTCTTTAGGTTACTAAGACAACATGGATATCCCATATTGCCGGATGTTTTT(C/G)AAAAGTTCAAGAACGAGCAAGGAAACTTCAATGAAACACTTGTTGGTGATGTTGAGGGAATGTTAAGTTTGTNNNNNNNNNNNNNNNNNNNNNNNNNNNNNNNNNNNNNNNNNNNNNNNNNNNNNNNNNNNNNNNNNNNNNNNNNNNNNN
Unigene0077326	20	T	-	C	NNNNNNNNNNNNNNNNNNNNNNNNNNNNNNNNNNNNNNNNNNNNNNNNNNNNNNNNNNNNNNNNNNNNNNNNNNNNNNNNNNNNNNNNNNNNNNNNNNNNNNNNNNNNNNNNNNNNNNNNNNNNNNNNNNNGATTCATGCAAGGTGGTAT(T/C)GCAAGACACATGAAACCGAGAAGAGTTTCTGGTTCACTTGTTTACTATGCGAAGAAAAACATACCTTCTTTGTCAAGTTATCAAAACGGAAACTCGTCAAAATCAAATCTTTCTGAAGCTGATCAAAGGAATCTGATTGAAGAAATAGTT
Unigene0077794	110	G	-	C	NNNNNNNNNNNNNNNNNNNNNNNNNNNNNNNNNNNNNNNNNATAATATCTCTTTTGCCAATCCATTAACGGGTCAAATCCACCAACTAACAAAAGGGTATTTGGATAATCCACTTCTGAAATATCCATTGTATTAGGTCCACTAACATTA(C/G)ACGATTGATGGTCTCGATTCGACCCATCAGGCAAAAACATCTTCCAATACCAATCGGTTTTATCCATTGAACAAACGGGTACCCCCTTCAAACGAATTTCAGATTCAGTTCGTTCCTCTCCTCCAAAAAACGGTTGCATAGAAACCATTC
Unigene0077794	117	G	-	C	NNNNNNNNNNNNNNNNNNNNNNNNNNNNNNNNNNATAATATCTCTTTTGCCAATCCATTAACGGGTCAAATCCACCAACTAACAAAAGGGTATTTGGATAATCCACTTCTGAAATATCCATTGTATTAGGTCCACTAACATTAGACGATT(C/G)ATGGTCTCGATTCGACCCATCAGGCAAAAACATCTTCCAATACCAATCGGTTTTATCCATTGAACAAACGGGTACCCCCTTCAAACGAATTTCAGATTCAGTTCGTTCCTCTCCTCCAAAAAACGGTTGCATAGAAACCATTCCTATAAC
Unigene0082280	2105	T	-	C	AGGAAAACAAGTTCCTGTAAGGCATGGCGTCGAAAACACGGAGAGCCAAGTGGCAGTGGCCATTGCGCATGTGAGTAGAAATTGAATTGGTACATTTCACAATGTGTGGGTCTCTGTCTAGGATTTGGGGTTTGGGTGTTGTTTGGCTTG(T/C)GCATTGAACTTGAAAACTGAAATCATGTGATTGTCTCAGATTATTGTTCCCGCTTATTGTTTTCAGTTGTTGCAGAGCGTGGTTCTGGCTTTTCTTCCAAAAGCTTCGCATTCAAAAAAATTATGACGCGGCTAAGCTAGTCTCTGTAGT
Unigene0082424	57	A	-	C	NNNNNNNNNNNNNNNNNNNNNNNNNNNNNNNNNNNNNNNNNNNNNNNNNNNNNNNNNNNNNNNNNNNNNNNNNNNNNNNNNNNNNNNNNNNNNNGATTGAAATAGATATTTTTTCGCCTTTTCCAAACATCATAATCTGTCTTAAATGAA(A/C)GAAAGTGAGATTAAAGTTTGGCATGGATTGAGTCCCAAAGAACACTCTAGAGGGAGACATCAATATGTTTCTGGTTCACTTGATACTTGACTTGGATGTCTTTTTAATGTTTGAGCAAATAAATGACCCTTACAACCATGTACTTTAAAC
Unigene0082424	68	T	-	C	NNNNNNNNNNNNNNNNNNNNNNNNNNNNNNNNNNNNNNNNNNNNNNNNNNNNNNNNNNNNNNNNNNNNNNNNNNNNNNNNNNNGATTGAAATAGATATTTTTTCGCCTTTTCCAAACATCATAATCTGTCTTAAATGAAAGAAAGTGAGA(T/C)TAAAGTTTGGCATGGATTGAGTCCCAAAGAACACTCTAGAGGGAGACATCAATATGTTTCTGGTTCACTTGATACTTGACTTGGATGTCTTTTTAATGTTTGAGCAAATAAATGACCCTTACAACCATGTACTTTAAACCAAAGTTTAAC
Unigene0083023	547	T	-	C	GGCCATAGCCGAGAGGACGGCGGAATGGGGACTTGTCGTGAACACAAGCAATTTCAAAGCAGGAATTGAGACATCAAGTTCTTCAATTGATGGCAGAAGCATGTCGGATAGGTTTGTTGAATCGACGAGGACTTCGGGCGATTCGAATTA(T/C)GCGTCGGAGGCTAGGTTGTCAGGGATGATTCCAAGAGTTTCACAAGACTTGAAAGAAGCATTGGCTACACTTCAGCAAACGTTTGTTGTGTCAGATGCAACTAAACCTGATTGTCCTATTTTGTATGCAAGCAGTGGTTTTTTTACTATG
Unigene0083116	1367	T	-	C	TGCTTTAACTGACTCATATTCCAAATGCGGTGCAATTAGTTATGCTGAAAATGTTTTTGTGAGAATGCCCGAGAAGAATTCGGTCTCATACACCACAATGATGATGTGCTATGGTCAGCATGGGATGGGTAAGAGAGCTCTTACCCTGTA(T/C)GACTCTATGCTGAGATCTGGCATTAAGCCTGATGCAATTACTTTCGTTGCCATCTTGTCTGCTTGTAATTACTCTGGATTGGTTGATGAAGGCCTTCAAATATTTGAATCTATGGAGAAAGTACATAAAATTAAGCCTTTAATCGAACAT
Unigene0083496	77	G	-	C	NNNNNNNNNNNNNNNNNNNNNNNNNNNNNNNNNNNNNNNNNNNNNNNNNNNNNNNNNNNNNNNNNNNNNNNNNNGTTATAAAAAAATTGCAGTTGAGATCAAATCAGTAGACATAAGTATACACTGCATAACTCTCACCAAAAAAGACTT(C/G)GGGAACAAAATTGATAGACAACAATTAAGAAACTGTAATTATTATCCACAAGTTACACTATGCAATTTCACCAACCTCCTCTAGACCCTGTTAATGACAGTGTCTTCATAGGGCACAGGGTGATAGAATTAGTGGAATGAAAAACTACTA
Unigene0084189	29	T	-	C	NNNNNNNNNNNNNNNNNNNNNNNNNNNNNNNNNNNNNNNNNNNNNNNNNNNNNNNNNNNNNNNNNNNNNNNNNNNNNNNNNNNNNNNNNNNNNNNNNNNNNNNNNNNNNNNNNNNNNNNNNNGGAAACTTCGCAATAGTAACAGTTTTTT(T/C)ATCAAGAGGACAAAAAAAGGTCGATTGAGAATGGAAACAGTACTGAACGTGAATGCAAGTACAAGAGTTGCAAATGATGTTGTCACAGAAACTGAACTCAACAAAATTCGTCTTGTGAGAGCATTTGTTGAAACACAAGATCCATCTTCT
Unigene0084571	452	G	-	C	TTCATTCTTTTCTTTTTGCTTCTCGCTTCTATGTAAATAGAGGTTTTGATAATTGGATTGACGTGTCTTAGGTTTTTGATTTCTGTGTTGCATTGCGGTTTTGCGGTTTTGGTTTTGGTTTCTGATTTCTGATTGTGAAGTGAAGAATAA(C/G)AATGGGGGCGGTTTGTTCGGCTGGGATGGCTGGGGAAAATGCAGAGCTTGGAGGGAAGAGTTTGGGGTTTTCGGGGAAGATTCTTAGGAAGGAAAATAGTTTTACGAATCGGAAAGATTCAGATTCAAAGTCTAATGATCAGGGAAAAAA
Unigene0084768	483	G	-	C	GGGAACCTTGATCTTAGTGATTTTCTTCAGGTTCGGAACGAACCAGATATGTATGTTTTGGGCTTTCAGGAAATTGTCCCTTTGAATGCTGGAAATGTACTTGTATTAGAGGACAATGAACCTGCTGCAAAATGGCTTGCCTTAATCAAT(C/G)AGTCTCTCAATGGTCCTTCACATTTTGCTTCGAATAGTGGACTAAAACCTACTGCATCCTTCGGCGGATCATTGCTCTTCCCCAAGCCTTCTCTAAAGAAGATCAAGAAAACTTTCAAGAAATTAAACGGAAAGAGGCTAAAAAGTTGTA
Unigene0085162	1044	T	-	C	TGATGCAGATAATGATGGTCGGATTAACTATGATGAGTTTGCTGCTATGATGAGCAAAGGAAACCCAGAAGCACATACCAAGAAGCGGCGTGATTCAACTTTTTAAGGTACCATGAGGAGATTCAATGGAGATGATCTCTTTCTGCATTG(T/C)GTTTTAAAGAATATTTCAGATGCTGGTGAGAGAAAAGTTACAGAATGTTAAGCTTGGTAGTTGTTTGGTTGGATAGGGTGGTGAAAACAAACAAAATTGCAAGGGAAAAAGAACTTCAACTAACCTATGAAAACTGTATAAACATACTAG
Unigene0085649	1783	G	-	C	ACGAGGATGAGAATAACAAACATTAAAATTTATGATAACTGGCTCAATGATGTATTCTTTGTTTTGCATTTGATTGTAATGGATGAGAATATGTGAAGGGAAAGAAGAGCATAATGATTGTTATGTGAGGCTAGTGAGTTAGAATCAACT(C/G)TCATGTATTTTTTTCTTATTTATTTCTCTATGGAATTAGAAAGATTTTTGACAAAATAAAACTTCCAAACAGAGTTATGTATACACAGTTGTAAACATAAACATCACAATGCAATCGCTCAATTAATANNNNNNNNNNNNNNNNNNNNNN
Unigene0087135	80	A	-	C	NNNNNNNNNNNNNNNNNNNNNNNNNNNNNNNNNNNNNNNNNNNNNNNNNNNNNNNNNNNNNNNNNNNNNNNTTTTTAGGAAAAAAGATATCATTGAGATGGCATTTTTCTTATAACAATATAAGGATACAAAAATGTAAAGACTAGAACA(A/C)AACATATAATGATACAAAAATGTAAATACTAGAACAAAACATAAGAACCTGACCCCAACCAATATAATTCTAAAGCCACATTTATTCTATGCCCAACCTCCTAACAATCCCAACCCCACACACAACACAAGATATTGCTTCAAAAGATTG
Unigene0001365	85	C	-	G	NNNNNNNNNNNNNNNNNNNNNNNNNNNNNNNNNNNNNNNNNNNNNNNNNNNNNNNNNNNNNNNNNNGGCGGAGCATCACTCTGGTGCGAGGGTTTGGGCTCTTGGTTGGGACTTTAGACTCTATGGTCCTCTCTTCACGGGAATAGTTAC(C/G)TCAGGAATAACATATTATGTGCAAGGTTTGGTATTGCAAAGCAGAGGCCCAGTATTTTTCACTGCATTTAATCCTCTTTGTATGATCATCACTTGTGCTCTAGGCTCATTTCTTTTCGGAGAACAACTCCACTTGGGCAGTATCATTGGA
Unigene0001781	2028	A	-	G	AAGCATTGCTTTATAGTTCGGTCTTTTCCGAGCATCAAGCCTGCAGGTTACGTTCTGAATGACCGAGTAGCCAAACTATTTTGTACCGAACACAGCTCTCGAGCATCAAGCCTGAAAGGGTGAAGATGTTCCCTCCCTGACAGCGACACT(A/G)TTGCAGTACGGACACATCATAGAGATGGGTGAATTAACCAAGACTCCTTCCTCGACTGATGGCTAATTAATCCTCAAGAAACCAAAATTGTAAACCTCTAACCTCCATGTTTCTGGAGCAGACTCCGACGACCATGATGCCAGATTGCCT
Unigene0002395	112	T	-	G	NNNNNNNNNNNNNNNNNNNNNNNNNNNNNNNNNNNNNNNGCAGCAAAAACAAGTTTAACATTGTGAATTTCAGCGTTTCATTTTTGCCACATAAGATTGGATGACGAAATATGTATAAACCGTAACCGTCATTTTCTTCTCTTTCTCCGA(T/G)ATCGAGTTTTCGCGATGAACCAGCGCGTGCCTTCCTCTCGAGCGGTTGGACTCGGCCGAGTCAAACCTCAAGCTCCTGGTAACCGCACCATCTTTTGTAACGATCGTCAAGCCAATCTTCACCTTCGATTCAAGGGGAATTCAATATCGA
Unigene0002489	435	C	-	G	CCTTTTTGTGCCACCGTTACCTCAACCTGTTAGTTTCAGAATCTAATATAATAGCTGTTTCTGTTGATTTCAGACTCCTTCCACTACATCCTCTTCCTGCAGCTTATGAAGATGGTTGGACTTCTCTCCAATGGGTTGCTTCACACACAA(C/G)TAATTACGAAACAAACAATAGTAACTTGGAAAGAGAACCATGGTTGCTAGATTATGGTGATTTCAACAAAGTTTACATAGGTGGTGATGTCAATGGTGCTAACGTTGCTCATAACTTAGCTATGCGTGCTGGATCTGAAACATTACCAAA
Unigene0002947	248	A	-	G	TGCTTTCAAAATCGCGACATTATTGATTAATATCTCAATGAATATTCATCTGGAAAAAAAAAACAGTAAATCAATGTGTTAATGGGAAACATCATCTGGTTTCCAAAATCTGTTGAGAAACCAATTGGAATCAGTCTCAACAGCTTCACC(A/G)TCTTGATTTCTGTGCCAGGTATAGTAAGCATGTGTTCTGTTCTTTATGTCAAAAATGGCATGTCCAAAGCTAGCTTCTCTGAATGCCGAGTAAGCTGGTTGTGGTTCTGTATAGATGGTTGCTAAGCCTTCAATGTTCCCTCCATCTCCG
Unigene0003635	1064	A	-	G	CTTGCAAGAGAAACCAAAGGCTTATTATTCTTTCTCTCTCTCTCTTTCTTTTTTTTTCCAAACCTCTACTTGGTTTGTGTATATTTATAAGCTAGTGGGATATGAGAACAGTAAATAAGAGCTAAGGGAAGGGTGTATATATAGAAAATT(A/G)TTAGGGTAGAAAGAGCTTGATGAGTGAGTTGGTTTGGAATCGAAAGGAACAGTTATATTAGAAAGAGGAAGAGAGAATTAATAGGGTAAGGTAGTGTGTGATATGAAGAAAANNNNNNNNNNNNNNNNNNNNNNNNNNNNNNNNNNNNNN
Unigene0003713	44	A	-	G	NNNNNNNNNNNNNNNNNNNNNNNNNNNNNNNNNNNNNNNNNNNNNNNNNNNNNNNNNNNNNNNNNNNNNNNNNNNNNNNNNNNNNNNNNNNNNNNNNNNNNNNNNNNTTTTGACAAATGAAGTGAATATATCACCATGAGCATAACTTCG(A/G)GTTCCCAAATGAGTACATTGAAGAACAAAGACAAGAAAAATTGGAAGCTAAGCTATACATTTGACCTATTCTGTGCTAGCACAAGTTCTCTCAATCACCTTTGAATCTGTTCTATGAGAGTTTCTAGATGGAGAACTTGTTTCTCTAGAA
Unigene0004052	1188	A	-	G	GTATTGATGATGATTGATGGGGAAATGCCGATTATTCTCTTGCAGCATTGCAATGTAATAACTACCTGGGAGTTTCACTTCATTCGGTTGTTAAGTTGTTTTTGTGTTTTGTGCTTGCGCTTGTATGAGTTCTGAAACCAACGTGTGAAT(A/G)TTACTAATAGCTTGTGATTCCCATTGTAGATGCAAGCTATTATGACAGTTTATGTATTTCTCATCCTTATGGTGTTAAAGATTTTGAGAAGATGGGGAAGCAGCAGTTCAGTTAGTTTCTGTATTAGATTTGACTAAGTTTGTATAGAGT
Unigene0004221	70	A	-	G	NNNNNNNNNNNNNNNNNNNNNNNNNNNNNNNNNNNNNNNNNNNNNNNNNNNNNNNNNNNNNNNNNNNNNNNNNNNNNNNNNGATAAATCCTCGAAATTACGATTTTATCCCTTGAAACTTCATCTATTCTAGAGAGAGAAAAATCCCAAA(A/G)AGAACAAAAACAAGAAGAAAAGGAAAACTTGGTTGTGTGAACTGTCAAATGCTGGCGACTGATTTAAAACGCGGTGGCGCTGCCACGGCGGTTTAAGATCTTCAGTTACCCGAAACTATTTTCCACCACCGTAAATGGGTTCCGGTCATA
Unigene0004221	78	A	-	G	NNNNNNNNNNNNNNNNNNNNNNNNNNNNNNNNNNNNNNNNNNNNNNNNNNNNNNNNNNNNNNNNNNNNNNNNNGATAAATCCTCGAAATTACGATTTTATCCCTTGAAACTTCATCTATTCTAGAGAGAGAAAAATCCCAAAAAGAACAA(A/G)AACAAGAAGAAAAGGAAAACTTGGTTGTGTGAACTGTCAAATGCTGGCGACTGATTTAAAACGCGGTGGCGCTGCCACGGCGGTTTAAGATCTTCAGTTACCCGAAACTATTTTCCACCACCGTAAATGGGTTCCGGTCATATTATCGGC
Unigene0004502	1665	A	-	G	TTTTGGTTGATCTGCTGCATTTTGTTATCAAATGGCATCATATTTTATAATTATGATTTTGCAGTTAGATTTGTGTGCCTTTTATTCAGTCTGTTGAACACACAAATTCCCGAGCCAGTATGTAAAAACCAGTTTTTATGTTGGTTTTCT(A/G)TTTCATCGGAGGATTTATTAACATGGGATTTTGGTTTAAGTGCTGAGTGTTTGGACCAAATAGCTTGACTATTATGAGTTTAAATTACTTCCTCACTATGAATATCCTGCATTGATGATGGTTTGAGGGGTCAGGGGTTGTTGTGAATGG
Unigene0004598	1045	A	-	G	GAGATTGTTCTCTGTAGTGTGACTTGTATTCATAAGTCTGGTTTCACTATGGAGTATTTATGTTATGGCCCTATATTTTGAAGAGGTACGAACTTATAAGTACATTCTTTTAGCTTCAACGGTATATTTTTGAAGTATATGCTTATGTAT(A/G)CTGGTATCATCATCTTTTATGGATTTGCTTTTGTTTTGTAAAATNNNNNNNNNNNNNNNNNNNNNNNNNNNNNNNNNNNNNNNNNNNNNNNNNNNNNNNNNNNNNNNNNNNNNNNNNNNNNNNNNNNNNNNNNNNNNNNNNNNNNNNNNN
Unigene0004626	2394	A	-	G	ACTTGGTTAAATTGATTTTTCCTCCTTGAAAGCAACTGAGTGGTGACTGTTAAAGTTTGGTTTTAGCAGTTTGAGTTACCCATTGAACTCTTCCAAAGTACAAATAGGAATAAATCAATCAGAAATTGATAATGGTGGTTAATGCCTCAT(A/G)TCTGAACACATTAACTCTTCAATGCAATCAATTTTTTATCCTTACATTTATTTATAACCCAAAATACTACTCCCATCATTTTTCTGATGCTTTGGTCATTTTCTCCACTATTAGGAATTTCAACTATTAACAGAATTTTGCAGGCACCAC
Unigene0005085	34	T	-	G	NNNNNNNNNNNNNNNNNNNNNNNNNNNNNNNNNNNNNNNNNNNNNNNNNNNNNNNNNNNNNNNNNNNNNNNNNNNNNNNNNNNNNNNNNNNNNNNNNNNNNNNNNNNNNNNNNNNNNTTTTAAACAGATAGAAAGCATCTTTACATTTGT(T/G)AGCACCATGTCGCAGTTGCTATGAGTCTATAATGTTTGATGAGGGTAAATAAATGAAGACTTAGTAGAGGGTGCATTAATTAATCAAATGTAGAGTAGTTTCATTACAAATTAAGACAATGAAAGTAGGGTAAATATACTATTCCCTACA
Unigene0005524	22	A	-	G	NNNNNNNNNNNNNNNNNNNNNNNNNNNNNNNNNNNNNNNNNNNNNNNNNNNNNNNNNNNNNNNNNNNNNNNNNNNNNNNNNNNNNNNNNNNNNNNNNNNNNNNNNNNNNNNNNNNNNNNNNNNNNNNNNGAAGAATGTAATTTTTATTCG(A/G)TTAACATGAACTAATATACAACCATTTTACAAACAAAGGAAATAACAAGCTCTGTATATTGAGTAGTAACACAGATAACAAACCCTATTTCTGCTAGGTCTTATTCTAACAAACTAATAAAATAGTAGACTAAAACAAAATAAGTGTCCA
Unigene0006015	48	A	-	G	NNNNNNNNNNNNNNNNNNNNNNNNNNNNNNNNNNNNNNNNNNNNNNNNNNNNNNNNNNNNNNNNNNNNNNNNNNNNNNNNNNNNNNNNNNNNNNNNNNNNNNNCCCTTTATGACTCTAATTTTTCAAATACGGTTTGAGGTGGGAAACTT(A/G)CCATTACTAAACATCCGAGTCAAAAAATAAACCATAAGTCTTCATTAACAAAACAAAAAAATCGGCAATTAAAGAACATGCTCCAACAAATTATAGATAATAAAGCAAAAGATTGCTTTTAACATATCACAGCACATACATACCGATTGG
Unigene0006988	111	A	-	G	NNNNNNNNNNNNNNNNNNNNNNNNNNNNNNNNNNNNNNNNCTTTAAAGAACTCTAGTTATCATTAGATGCATACAGCAAATAACACATATACAAGAGTTGTAAGACTTAGGCATAGATGAGAAAGGCTATTGTACAAATGAAAGAAATCA(A/G)AGAGAAAAACACACAACCAGTTGATTTTATGGATCCAACCTTGTTGATCACTTTGTCTTTGCATTCTTTTGGATGACACAAACAGTTCAAGCCAGCATTACAGCTACCATTAGGCTCTTGACACCCTTTGCAAATCTCTGGTACATGAGT
Unigene0007099	952	A	-	G	ATTGCCATTTGGAACTTCCACTCTTAAAGTTACAATCATTGCTCAGATGAATGATAAATATTGCATGAACGTGACTGATCTAGTTAAAAATCTGAGGCATGATCTTTCCGAATTACGTGACAACCAGAATAATATTTTTGAGAGGACTAC(A/G)TAGAAACTCCAATATGTTATTGTTTGTTTTGGCTTTAAAGTTTGTTGAAAACTGTATTTGGTTTCTTTCATTAAATTAAAGATATTGATGAGTATTTGTTTGTAATGAGAAGGAGAGATGTACTTTGAAAGGTTTGGTGAGCTTATGATG
Unigene0008877	1277	A	-	G	CTATGATGGCTTCCCGGGGAACACATGTATATAACGATTTGTTTTATGTTTTATTGATCGGTTGAAGTGTAAACAGATAACACCTGTGGTTGGATCGTTGTTTCGTCCTGGTTTGAGCGGTTTAAAATAGTTGAACTGTTATTGAGACGC(A/G)TCTTTGGTACTATGTTAAACTAATTCCTTTGAATGCAGGAACAAAAAACATTAGCACCGTCAACGGTGAACTTATCGACAGCAAACTTATCGACAGCAGCGACCAAAGCAGTACTCGTAGAGAAATACCGTTGGTCAGAATATGCGACTT
Unigene0009332	51	A	-	G	NNNNNNNNNNNNNNNNNNNNNNNNNNNNNNNNNNNNNNNNNNNNNNNNNNNNNNNNNNNNNNNNNNNNNNNNNNNNNNNNNNNNNNNNNNNNNNNNNNNNTAACTGTTTTATTTCATTGCTGCACTAATCGACAATTAGAGTTTCTACCC(A/G)GGTAGATACAAGGCATATTGTAATGCTTTGCCTGTGTGCAAGTACAAATAGAGTAGCATCACACTGAACAAAGTCATAACATTACTACTATTAAAAAAACAAAAAACAACACTACTATTATAAATTTATAATAAGTTAGATAAAAAAAAA
Unigene0009406	46	A	-	G	NNNNNNNNNNNNNNNNNNNNNNNNNNNNNNNNNNNNNNNNNNNNNNNNNNNNNNNNNNNNNNNNNNNNNNNNNNNNNNNNNNNNNNNNNNNNNNNNNNNNNNNNNTTGATTGAGATTAGCAGTTGATATTACACATAAATCGTAAGTAAG(A/G)AATTCCGAATTCGTTAAAATAACTATTGATTTTCTCACATTTATTTTTGGCTGAAAATGATTTTATCACTTTAGTTTACACTCTATTAACTTTTTGATGAGCCAAATTCAACAAAATTTACTATAAAATCAAAATGGGAAGAGATCAAGT
Unigene0009932	122	A	-	G	NNNNNNNNNNNNNNNNNNNNNNNNNNNNNAAAATAGAGAGGAGGTAAGGTATTTGAAGTGAGGTCTATGTCACTTAGATATATCTCAAAAATTAGGTAAATGCAATTTACTAATGTTTTTTACTCACTGTACTAATGCAAAATGAGCCTT(A/G)TGGTATTATAATGTTCTATTTATTAACTTAATTTTCTTCTACTTTTTCAGGTAAACAAATGCTATTGTGAATTTTTAATTCCAAGGAAGATACATTCAACAACTGAGGATGATACACTATAAACATATGCACACCATGCATTTTACTTTT
Unigene0010602	1099	A	-	G	GATATATCTCCAAATCCTGGACGCTCGGATCCGATGTATGTCGTGTACTCAAGGAAGCTCTCTGCCGCTTAAGAGAAATATGAAATCAGAATTTATAGCAGTGTGTTTACGTATCAGCAGTAACTGTGATGAGGAATTCGTTCCTATTGT(A/G)TGTCAATGATTTATTTTAATGTTATAGCATTGTTTCTTGTGCATTAGTCCCTTCATGCCAATTTCCTCAATCATCAAATACATTATTTTCTTGCACATAAGTTGAATTCAACATACAGATGCAATCGTCGTCTGTCTTGGAGGCTAACTC
Unigene0010602	1197	T	-	G	CAGTGTGTTTACGTATCAGCAGTAACTGTGATGAGGAATTCGTTCCTATTGTATGTCAATGATTTATTTTAATGTTATAGCATTGTTTCTTGTGCATTAGTCCCTTCATGCCAATTTCCTCAATCATCAAATACATTATTTTCTTGCACA(T/G)AAGTTGAATTCAACATACAGATGCAATCGTCGTCTGTCTTGGAGGCTAACTCATTCGTAGTCGATGTGTGACTAATGAGAGTATAAACTTGTTAAAAATGAGCGATCTTAAATGAGTGAGACGTGTCTGTAACCTTATTTTAAAGATTGC
Unigene0010870	1628	A	-	G	GTAAACAAGCATATATGTTTGTTTCCATATTGCATCTCTCCACTTTACAATTAGTTGATTTATTTTATAAATTTGAAGGATTTTTTAAGTTAGTGGATTTTTACATGTTATCACGAGAAAGGAGCATTAGGTTTAATTAATATTTATATT(A/G)CTAGGTTATACTTGAAGAAATATTGGGAAAACTTATGGGTAATTTTAATAATTTATTTGGCCATAATGAGAATAAAAGTGAGTGACAAACATGGGNNNNNNNNNNNNNNNNNNNNNNNNNNNNNNNNNNNNNNNNNNNNNNNNNNNNNNN
Unigene0012939	96	A	-	G	NNNNNNNNNNNNNNNNNNNNNNNNNNNNNNNNNNNNNNNNNNNNNNNNNNNNNNNCACAAACTCCTTGTTATATATATTATATACACACGGTATTCAATAAGTACAACAAAAGTTCAGTTATGCATATTAAAAATTAACATATAATCTGA(A/G)TTTTGGTCAAAAAGATATCCTGATAAATACAATTACATTTAAGGCTAAAATATAAAGCACAAATGCCGACCTAAGTAGCATGAGCCTCTGCTGGCTTTCAGTTCTGCCTGCAGAATGGTAAGGAAGCCTCTGAGGACCATCATAATCGGA
Unigene0013092	825	T	-	G	CAAATGATTACTATAATACATGATATCATAAGCCAAAAAAGTTTGGAAGATAAAATGAATGGGCCAAAGTTGAATCTTACTAATGGGAAGGAAATTCATATAGCTGATGAAGTTACTGCTACTAAACAAGTCAATTGTTGTTCAAGATGA(T/G)AATTTGGATCATATATTTTTGATATTGTGTAAATACTATTACTTAAATGATTATATAGTGATGATTACTATTACTATTGTATTTTTCCAACTTCTCTTTGTGTAATTCCTTTTTACTTTGAGCTTTGCAATCTGTATGGGANNNNNNNNN
Unigene0013192	100	A	-	G	NNNNNNNNNNNNNNNNNNNNNNNNNNNNNNNNNNNNNNNNNNNNNNNNNNNCTTGGTTAGTTAGTACTTCAAACGAGTTTTTAACAACCATTGATATATTATAAAATTACAATCATTGATATCTTGATCATTCTTATACTGATAACTGTT(A/G)GAAGCTGTACTTTGTAGACCAAAACTTATTTGAACTATACTATACATATCGAGAGCGGTATATCGTGTGTGGTAAGACAGACACGATTGTGATCGCTAGCTTACAGAGCATAGATTTTCTCAATGTCTGAATTGTATTCGTCCAAATCTG
Unigene0013702	357	T	-	G	ATGGTTTTGATGCTCCAAAGAAGAAGAAGTCACCAAACAAGACATGTAATTGTTGGTTAAAGTGTTGTTGTTTTGGATTTTGTTGCATGGAAAAGAGGAAGAAGAAAAAGGGAAAAAAATCTAAATTTGAGATGATGGAAAGTAGCCATA(T/G)ACAAGTACATTCTGAATCATCTATTGTTATGAGTGCTATAGGAAATGAAGATGTCTTTCCTTCAATCTCAAATCAAAAGTTTGTCAAGAAATTTGGACAATCTCCCATTTTCATTGCATCTACTCAATTGGTTGATGGTGAGAAACTAAA
Unigene0013718	4655	C	-	G	TTGTTATTGGAATTGTTGTTGAGTTGTTGTGGAGAGGAATCTGTAGAGGAAATTGAAGAGGAAACAATAATAGTGCGTCTGTTTGAAACAGAAAGTGAGAAGGGTATGGGTGTGGAGGATGTAAGAGTGAGTATTCCAGTGGAGGAGACA(C/G)AGAAATACATGACTGTTGTTTGGCTTTGGAGTATCCTCGTTCATGNNNNNNNNNNNNNNNNNNNNNNNNNNNNNNNNNNNNNNNNNNNNNNNNNNNNNNNNNNNNNNNNNNNNNNNNNNNNNNNNNNNNNNNNNNNNNNNNNNNNNNNNN
Unigene0014629	1720	A	-	G	TGTATACAACTGCAATATAAATATTAAATCATACCAGGCTTATTACCTGTTTCCTACATTAAATGCTTGGTGAAGTTATGTGTAGCAGAGCTACTTTTTTAATCATCAGTGAGAGTGAGACTAGATGGAAGAAAGACTCGGGGTCATATT(A/G)TGATAAAATGTTAAAAGAAAACCCATACTGAAAGGCTAAATTGTCTCTCAGTGTCTTCTCTATGACAGGTCAAATGCTTTATGAAGCAATTACTTTCTGGTCTTGAGCATTGCCACAGTCAAGGCGTGTTGCACCGTGATATCAAGGGTT
Unigene0014629	1745	A	-	G	AAATCATACCAGGCTTATTACCTGTTTCCTACATTAAATGCTTGGTGAAGTTATGTGTAGCAGAGCTACTTTTTTAATCATCAGTGAGAGTGAGACTAGATGGAAGAAAGACTCGGGGTCATATTATGATAAAATGTTAAAAGAAAACCC(A/G)TACTGAAAGGCTAAATTGTCTCTCAGTGTCTTCTCTATGACAGGTCAAATGCTTTATGAAGCAATTACTTTCTGGTCTTGAGCATTGCCACAGTCAAGGCGTGTTGCACCGTGATATCAAGGGTTCCAATCTGCTTATTGACAACGAAGG
Unigene0015048	79	A	-	G	NNNNNNNNNNNNNNNNNNNNNNNNNNNNNNNNNNNNNNNNNNNNNNNNNNNNNNNNNNNNNNNNNNNNNNNNATGAAATATGATCAGAAAATTATTTTAGAATTTGAAATCCAAAATCATGATCATGAATAACCAAAAATAACAGAAGAT(A/G)GGGAAGATTAAAAGAAGGAAAAAAATACAGGTCTAGAAATAAATCAAGACATGGCGATTGTAAATAGACATCGTCATGACAAATGCTTTGCACCTGTTTTAATTCTCTCACTCATGCTAATAAGTGAGTAAAGTCAGTAAAACTACAATC
Unigene0015757	412	A	-	G	TAATGGTGAAAAGCGAAAACAAAGTAGTAGAAATGTGTTTGACAATGCTAGCAACCTCCTTACAAGCTTGTTAAGTGGTGCAAATTTAGGGTCCATGCCCATAGCTGAAGGTGCCGTCACAGATCTGTTTGACCGGCCGCTGTTTTTCTC(A/G)CTATATGATTGGTTCTTAGAGGTATTCAATCTTTTCACTTATCCACTTTTTAATGTTGGTTTGGGAATTTCAACTTAGTGTTAGTAATTATAGTTGTTGTATGTGAAAATATGTTGTTTGCTTGCGTTGCTGAATTTGTTAGTTTTACTA
Unigene0018102	456	A	-	G	TCACAAGAAGCTTCTTGCTGGTGATTCAATTGTGTTTTTGAGGGCGGAAAACGGTGATCTTTGTGTCGGGATTCGACGGGCAAAGAAAGGTATCGGTGGCGGACATGAGGATCCTTCAGGGTGGAATCCTGTAGGAGAAAAGTTTCCTCT(A/G)CCTTGGTTTGCACAGAACGAGAATCAAATGATGAGAAACGTTAACAATAACAACAACAATGGTTTTAACTCGAGCGCGAATGTGATGGGGAGGGAAAAAGTTAGGCCAGAATCAGTCCTTGAAGCGGTAACTTTAGCTGCAAATAAGCAA
Unigene0019117	54	A	-	G	NNNNNNNNNNNNNNNNNNNNNNNNNNNNNNNNNNNNNNNNNNNNNNNNNNNNNNNNNNNNNNNNNNNNNNNNNNNNNNNNNNNNNNNNNNNNNNNNNGTTTTCCATGGTTGAGCTATACTTTACAAAGTGTGAGTGGATTCAAAAGTTCC(A/G)TTGTCTTGTTGCAAGTTGCATCCACTCCAAAATTAAAAAAGGAAGTATATTTTTCACAAACTAAAATTTGCATTTTATCTAGCATGTGTAAAACTCTGAAGAAGCAAATGCCTAGTAATACACAAGACCAATCAAAGAAATAAAGGTTAT
Unigene0019272	1219	A	-	G	CTCCCATTCTCTTCAATTATTTAAGATCAAGTGAGGATCAAAAGCCACCAAAATTTAACCATCTATGCAACAATCACAAGTATAAAATGAGTACTTACCAATATATTTAACCCAAATTCATGATCATCGCAATCACATAGTACTATAATT(A/G)TGATGCAAATTTCAAGAAAAGATCAATAACAATAAGCATTAAACAGTGCGAGAATAAAAATGAGGAAATTGAAATGAAAATTGAGGGCATAAACCCTAAGTTTTGCAGTGAAAAATGAGAGAAAAAGAAAAGGGAAAAGATAGTACCGTT
Unigene0019830	1468	A	-	G	GATTCAGAGAAGAAAGGCCAGTAAACATCACGAGGTTCTGGTGCCAACTCAGTAATCCACTGTGTTGGATTGACTGATTGCTGTAGATGGAAAGTAGCTTCAGCAGCAAAACGAGTCCTGAAGAATACAAACGCAGCTCGAGCTTCTCCT(A/G)CCAGCGAAGCCTCTGACTGCTTTAATCTTAAATTCTCCTCGATTTCCTCTAACTTCTTTTCGTAACGCTCTATGTGATTACTTCTTTTGCCAAAAAGTCGAGAAAGGGCTCCATGCCTGATCTTTCTCTTAGTGGGATCTGGTCGTAATT
Unigene0020412	78	T	-	G	NNNNNNNNNNNNNNNNNNNNNNNNNNNNNNNNNNNNNNNNNNNNNNNNNNNNNNNNNNNNNNNNNNNNNNNNNGTAACTAAGTTTATTATATACCGATTCAATACACAAACTACAAAATAATTTTGTTAAACAAAGGTATTACATAATGA(T/G)ATACCAAACAAAAACAATCACAAACACTCTTTTAAGTCTCTATAATTTAACAGAAATGGTTAAAATTTCAGCCTCAAGAGCTAGTTGGTCGATGGCACTGCTAAACCCGGCACAACAAAATGCGAGACACCTTCTGATAAATTCTTCATT
Unigene0020442	23	A	-	G	NNNNNNNNNNNNNNNNNNNNNNNNNNNNNNNNNNNNNNNNNNNNNNNNNNNNNNNNNNNNNNNNNNNNNNNNNNNNNNNNNNNNNNNNNNNNNNNNNNNNNNNNNNNNNNNNNNNNNNNNNNNNNNNNCCCACACCTCAAAATCCACAGG(A/G)GCGATCAACATAAAAATGACTCAACAATAACAATTGTATGGAAAATTGTTACTGCAATTTTTCCCATGCCACAAAAATCCACTGAAGTGCTTCAAAGTTCAAACATATGGATTGCAACAAAGCATAAAATTCATTCATTCCTAGGAAAAT
Unigene0020895	202	T	-	G	TAAGATATGGAGACTTTTCCCGTATTTTTACGGAGTGCGTCAAACGCAGGCAACTGATAAACAAACAACCTTTTTTGCGGTAAATTTAGTTTAGTTGCATTAAAAGGTAATCTTTCAGCAAACAATTTTTGTCTGTAATCGCAGGTTGTC(T/G)AACTGAAATCAGAATCTGTCGTTTTCTTCAACAATTGTTAATAACCGAGTGAGAATGGAACGAAGAACATAACTAGTCTTTATGTGGCCCCACCTTACTTACTACCAACCAAAATCTCACAAGACTAAACACTTCCATTTTCTCTATTCC
Unigene0021775	36	A	-	G	NNNNNNNNNNNNNNNNNNNNNNNNNNNNNNNNNNNNNNNNNNNNNNNNNNNNNNNNNNNNNNNNNNNNNNNNNNNNNNNNNNNNNNNNNNNNNNNNNNNNNNNNNNNNNNNNNNNGGGGGGTCTGTGCTTCATAGTTCATAACATCAACA(A/G)GATAATGCAACTCATAATGTGGTTTTGTTTTACCTAATAAGGAAATAAAAATATTCAAACAGATTATATACAGAAGCAATTGCACCTGTGGATTATCAATTCTGTCGAACTCACGACCGTCGGGTAAAGTACCAGATATATACTGCCAAC
Unigene0021775	53	A	-	G	NNNNNNNNNNNNNNNNNNNNNNNNNNNNNNNNNNNNNNNNNNNNNNNNNNNNNNNNNNNNNNNNNNNNNNNNNNNNNNNNNNNNNNNNNNNNNNNNNNGGGGGGTCTGTGCTTCATAGTTCATAACATCAACAAGATAATGCAACTCATA(A/G)TGTGGTTTTGTTTTACCTAATAAGGAAATAAAAATATTCAAACAGATTATATACAGAAGCAATTGCACCTGTGGATTATCAATTCTGTCGAACTCACGACCGTCGGGTAAAGTACCAGATATATACTGCCAACCAAGAGCATCACTTTCA
Unigene0021867	873	C	-	G	TTGTACTTCCATTTGTATCTCAAGCGCCTCAGCAATCTTCGAACTTTCCGTCGTTTGATTCTGGTTCGCGACACTGATTTCTCTGCCGCATTGACTGTCACTACTTTGAATCTCTATGTAATCTTGTTTGTCATCAGAACAGGTTTCTAT(C/G)AGTTGGTTTTTTCCAAGTCTATATTTCTGTAAATGACTCTTGAGATGATACAAAGTGAGTCCCGGAATCGCCATCGCCCTCATCAAACTCTTCGGTGTTGCTTTTTCTGCACCTCCAAGTTGGTGAATAGCATCAGTGAATCTTTGGTGA
Unigene0022392	24	A	-	G	NNNNNNNNNNNNNNNNNNNNNNNNNNNNNNNNNNNNNNNNNNNNNNNNNNNNNNNNNNNNNNNNNNNNNNNNNNNNNNNNNNNNNNNNNNNNNNNNNNNNNNNNNNNNNNNNNNNNNNNNNNNNNNNTTTTATTCTAGTCTTACAGTTTT(A/G)GCTGTTGTCACTTGGCAAGTATTGATTGTGGCTATACCAATGGTTTACGTTACAATTCGCTTGCAGAAATACTACTTTACCTCAGCAAAAGAAGTGATGCGGATGAGTGGCACAACAAAATCCTGCTTAGCTAACCATGTAGCTGAAACT
Unigene0022392	49	A	-	G	NNNNNNNNNNNNNNNNNNNNNNNNNNNNNNNNNNNNNNNNNNNNNNNNNNNNNNNNNNNNNNNNNNNNNNNNNNNNNNNNNNNNNNNNNNNNNNNNNNNNNNTTTTATTCTAGTCTTACAGTTTTAGCTGTTGTCACTTGGCAAGTATTG(A/G)TTGTGGCTATACCAATGGTTTACGTTACAATTCGCTTGCAGAAATACTACTTTACCTCAGCAAAAGAAGTGATGCGGATGAGTGGCACAACAAAATCCTGCTTAGCTAACCATGTAGCTGAAACTGTTTCTGGAGCTGTGACAATACGGG
Unigene0022641	159	T	-	G	TATTATCCAATAATTTAAGAATAGATGTTTCTAAATTGGTTGAATGTGGAATTGGAAAATTCCAACATCAAATTAATCTTAAACCAAACAACTCTTGACATAAAATTTCAGTCACTAGACTCGTTCAAAAGGTGTGTGAATTCTTAACTC(T/G)AGATATTAAAAAGTTAAACCAGCAACCTTTGCAGACTTGCAGTTTCGAACAAACAAACATTGTCATCATATTCGCGAAAATTCTCCAAGAATGCATAAAAACCACGTTTTTCTTCCCGGATTCAGTTCATTTACAGTTGCATTTTCCAAA
Unigene0026556	63	T	-	G	NNNNNNNNNNNNNNNNNNNNNNNNNNNNNNNNNNNNNNNNNNNNNNNNNNNNNNNNNNNNNNNNNNNNNNNNNNNNNNNNNNNNNNNNTGAAATTTGAAATGATGCTTATAGATAATTGCCTTCATTATCAAAGAACTTGGAAATTGTTG(T/G)TTTGCATCATTACAAATTCAATATAGCACTCTGTATTACTTGAGCTATACAAGCCACACCAAAAATACAATTAAGATACATATGATCTATGTAGAACTTTATTTAGAGTTCATCCATATTGGTTCTAGAGAAAGTTTTTGCTTTGGGTCC
Unigene0027468	250	C	-	G	ATTTCTTACATCTCAAACCAATCACCCTTTATCATCCTTGATATGTTCAATCTAAGAACAATCAATGTTGATATACAAAACGAAGTTGCTTTTATTCAAGCTGGTGCTACTCTTGGTGAAGTTTATTATAGAATTTACGAAAAGAGCAAA(C/G)TTCATGGCTTTCCTGCTGGTGTGTGCCCAACTGTTGGCGTTGGTGGTCACTTTAGTGGTGGAGGGTATGGTACCNNNNNNNNNNNNNNNNNNNNNNNNNNNNNNNNNNNNNNNNNNNNNNNNNNNNNNNNNNNNNNNNNNNNNNNNNNNN
Unigene0036869	87	T	-	G	NNNNNNNNNNNNNNNNNNNNNNNNNNNNNNNNNNNNNNNNNNNNNNNNNNNNNNNNNNNNNNNNATTCCCTAATATATTCTAGAATAGAGTGGGATATTTATGTAATTAATATCATGATATGTATTTTTTTTATATAATTCATCTTCCCT(T/G)TGTTATTCACCACACGGTTTAATCTAAATGTCTCTTAGTTTCACTTATTTCAACAACTTCTATCAAATAAATGAATTGATCAGCCTATATATATACACAGCCAAAAGAATACATGGAAGAAAAAAAATGATGAACAACCACTAAACTACT
Unigene0038378	98	A	-	G	NNNNNNNNNNNNNNNNNNNNNNNNNNNNNNNNNNNNNNNNNNNNNNNNNNNNNGCGGAGAGAACTCAAGACAGAAGTGTGTGTATGTATCTCTTGTTTTATTTTTTGTTTTGTCATCTCCAACATCAAAACTTGTCGAAATTTCAATTTT(A/G)CCCTTCTAGAGAGAGAAAATATTACAAGAGATTGGAGAAAATTGTAGGAGAGAGAATTTTTCTTTGTTTTTTTTGTGCTCCAATGGTTCAACTGGGAACACAGAGAGAAGAAAAAAAGAAATTTTATGTCTTTCTTCGACGAGTCTGTCT
Unigene0038811	117	A	-	G	NNNNNNNNNNNNNNNNNNNNNNNNNNNNNNNNNNCTGCGGCATGTTGAAGATGATTCAACAATAATGTGGGCGGTAGGACTCGATTCCGGGGTTATTGCAAAGCGAGCACAAATTTGTGGCGACGAAATTGAAATGGTTGTCCCATTTGA(A/G)GGTGTCAACTTTGGAGAGTTGAAGGTGAGCATTGTAGTAAAAGAGTGGCAATTTTCTGATGGAACGCATAGCTTGAACAAACTCCGTAACAACTCTCAGCAGTCGCTAAATGGATCGTCAAATCTTCAGTTAAAAACTGGAAAGAAACTT
Unigene0039562	279	C	-	G	TTCCTTTGTTCTATATGATATATTATATTATATGAAAATGTTCTTATCTAGATATGTTCACACTGATTTCTTCATTCTTTAATAAAAACAGTTGATTGTACCTATTTAAAACAAGTTGGATAAAAAGTGTAATTTAATCTATCAATCTCT(C/G)TTTTCTAACAAAAGCGAATTGTTGCATATCTCTGTTTTCAAACAACAATAGGCTGGTCTTTATCTTTGTCTCCGGAGAGATTCAGTTTAGTCCATTTGACACGCCATGTCAAAAGTAAGAGCGCTCCAGTTTGACACACAAGGCCACAAA
Unigene0041469	771	T	-	G	TGAATTGTTCTGAAAGGAGTTTGTCAGTGAAAATACTGGTTTTTTGAAATGTATTAAATTCAACTGTGGTGTTTTGGTTTATTTTTACAGTGACTGAGAAGTAGTATGAATGGAACTGTCGAGAGGCCTAAAACTCGGACAAAAATATTC(T/G)ATTCTGTTTTTAACACCGCTCTTTTCTCTTTGCATAAACCATTATCGTTCACAAGNNNNNNNNNNNNNNNNNNNNNNNNNNNNNNNNNNNNNNNNNNNNNNNNNNNNNNNNNNNNNNNNNNNNNNNNNNNNNNNNNNNNNNNNNNNNNNN
Unigene0042106	38	T	-	G	NNNNNNNNNNNNNNNNNNNNNNNNNNNNNNNNNNNNNNNNNNNNNNNNNNNNNNNNNNNNNNNNNNNNNNNNNNNNNNNNNNNNNNNNNNNNNNNNNNNNNNNNNNNNNNNNNTTGCAAAAGAAAAGGAATTGAGTTCACTTGTATTTCC(T/G)GTTTTGAAATGGATTATCTGATTAATTAATTACAACCCGTGGTTTAAATAAAAAGCGATACTACTACAAAGTTCCGAAATCAGCGATGGACAAAGGCCTTTAAATTCCCCTTCGCACAAACATAATCACAATTTATTTTCTTCCAGAACC
Unigene0042128	1314	C	-	G	AACTTGCTCAACTATAGTTTTGTGTCTTTGTGTGAGAATCTTCATGTTTCATCTCACATTTTATCTTTTCAATTATTATTAGTTACATTTAGTGTAAGGAACTTTATATTTAGAGACAATATTTATATCTGTGATGTATTGTTATATGAT(C/G)ATATGAATTTAGTAGTGTTATTTGTTTAAAAAAAANNNNNNNNNNNNNNNNNNNNNNNNNNNNNNNNNNNNNNNNNNNNNNNNNNNNNNNNNNNNNNNNNNNNNNNNNNNNNNNNNNNNNNNNNNNNNNNNNNNNNNNNNNNNNNNNNNN
Unigene0042152	39	A	-	G	NNNNNNNNNNNNNNNNNNNNNNNNNNNNNNNNNNNNNNNNNNNNNNNNNNNNNNNNNNNNNNNNNNNNNNNNNNNNNNNNNNNNNNNNNNNNNNNNNNNNNNNNNNNNNNNNGTAACTTTAGAATCAAGGCAGCCAGAATCATAGGGATA(A/G)AGCCCTACATTTAAATTTCTTATTCAACATGTCGGAAATCTATATATGTTCTATAGAGATTTATAACACATTTTGAAAATACACTAAAGCTAATCACAACAACTTAATTTCAAATGATGAATATCTCAAATCTCAAAGCCTCTGAACATG
Unigene0042172	111	C	-	G	NNNNNNNNNNNNNNNNNNNNNNNNNNNNNNNNNNNNNNNNAACACTGCAACATCAACTTTTTTAACCATTTAAGCTCTGTTGAAGATACAAATATTACATGCATGAATGAAAATATGACGTAAATATGTATAAACACCATAATGCAAATG(C/G)TTATTTTTTTAAAAATCACTCAAGAATAAGAGTATCTTAGAATAAAACTTTGCTCTCATCATTCAGACGAAAAGCACATGATTCATCATCCCAGTAATATTAATACAGAAGACAGCACAGATATTACTGTGAAATAAAAACACATCTCAC
Unigene0042203	90	A	-	G	NNNNNNNNNNNNNNNNNNNNNNNNNNNNNNNNNNNNNNNNNNNNNNNNNNNNNNNNNNNNNCAAGAATCCACGATTCTGGTTTAATATTATAAATAATTGATCACTGATGTCAAACAAACTAAAAACATACATAATAATCATAAAACACT(A/G)ATAAACACATTATTATCATTCAAATAAAACAAACTCATTAAAAACACACATAAGAAATTTATTTCAATAAAACAAGTCAAACTAAATAGTAGGAGAAATGAGATTGTTTTTCCCTGTGGCCTTGGATATAAAAAGCTTTTGAAATTTAGA
Unigene0042544	74	A	-	G	NNNNNNNNNNNNNNNNNNNNNNNNNNNNNNNNNNNNNNNNNNNNNNNNNNNNNNNNNNNNNNNNNNNNNNNNNNNNNAAAAAATTAAAAAGGTTCCTTTTTTTGATCTAAAAAAATCGACTCTTTTGTTTCTATTGCTGGTGTCCATTTT(A/G)TGTGCGTGGATGTCACTATAAGCATAGCTCGTTGTAAAATCAGCAAAAAATTATCATTTTCAAATCACTGGGAAGCGACACGATTACAGTTGACTGAATTCGGTGGCAACATGTATACGGCACTCCGATCATCGAAGCTTCTCTATCGCT
Unigene0042820	1605	C	-	G	TATGATTTATAAGCTCTATGAAGAAAAATATGTATACATATATGTGATTTGTATTACTATTATGTGCTCGTAATATAGAAGTGTTGTTCTGTGTATGAGACATTTTCTTCCATGCTTTAACAATTAAGTTAAATCGTAGATCTTTTAAAA(C/G)AATTGTTTTCTGAGATGTCTAAATAATTTAGAATGTGTTATGTTTGTTGGAACAAGATCAAATTTGTTCAAGGTGAATCAATGGTGGAAGTTGTTATTTTGGNNNNNNNNNNNNNNNNNNNNNNNNNNNNNNNNNNNNNNNNNNNNNNNN
Unigene0042852	101	A	-	G	NNNNNNNNNNNNNNNNNNNNNNNNNNNNNNNNNNNNNNNNNNNNNNNNNNTAAATAATTTAATAATTTATATACATATTGCAAGAAAAACCTAAAACAGTTATATACAATTTAAGACTTCTGCAGTGCTGAGACTTTTTCTCCAGTTTTC(A/G)GGAGTTAAAATCCCTGCCTGCGGGGTCTTTAAATGGGGGAAGCCCCCCATGAGAATCCCCACTTAAATATACAAATTGACATCCCTAGCTAGCTATAATTGATGATACAAGTTTATAATATCACACCATACCCACCAATATAAATTTTTA
Unigene0043048	2678	A	-	G	CATTTATTTTCAATTACTTTCACATTAGATATTTTAAAGTTGTTAAAAAAAACATTGCTACTTAGATGTGGTAAACTTCAGTTACTTTAACCACTCCGGAATGTGATGACATACTTACTACTCAATATGAATAATCTTTTCACATTGGAT(A/G)CTAACTATGTTATTATAGAGGACCAGTTTGCTTTANNNNNNNNNNNNNNNNNNNNNNNNNNNNNNNNNNNNNNNNNNNNNNNNNNNNNNNNNNNNNNNNNNNNNNNNNNNNNNNNNNNNNNNNNNNNNNNNNNNNNNNNNNNNNNNNNNN
Unigene0043189	1477	A	-	G	TGTGTTTCTAAGAGTGTAAGTATAGGGAGTTAGAATTCCGGAAGGGTCAGTTGCAGCCAATCCAACTGTTGTCCTTTCAGCAGCTTCAAGGCTACCCATTCTTGAGAAGAAAAAGATGAAAAAGTGAGTGAGAGAGAGAGAGGAAATAGT(A/G)CAGAGTGTNNNNNNNNNNNNNNNNNNNNNNNNNNNNNNNNNNNNNNNNNNNNNNNNNNNNNNNNNNNNNNNNNNNNNNNNNNNNNNNNNNNNNNNNNNNNNNNNNNNNNNNNNNNNNNNNNNNNNNNNNNNNNNNNNNNNNNNNNNNNNN
Unigene0043280	2224	T	-	G	TTGCCCCGTGGTGGTAGTTATTTGTATTATTGCATCTGAATTGTAATCCATGATTTGCTTGGTACCATTGCAGCTATGCATTAACGTTACAAATTCTTTCTATTGGAATGGAAATTTCATGAAAATGATTAGCCTAGAAAAGTGTTTTCC(T/G)ATTTGATTAACAGTAGATGTCTTGAAATGTTTGTCATTACATTATGAATATACATTATTTNNNNNNNNNNNNNNNNNNNNNNNNNNNNNNNNNNNNNNNNNNNNNNNNNNNNNNNNNNNNNNNNNNNNNNNNNNNNNNNNNNNNNNNNNN
Unigene0045345	39	A	-	G	NNNNNNNNNNNNNNNNNNNNNNNNNNNNNNNNNNNNNNNNNNNNNNNNNNNNNNNNNNNNNNNNNNNNNNNNNNNNNNNNNNNNNNNNNNNNNNNNNNNNNNNNNNNNNNNNGGTCTTTATAATAACACTTGACTAGAAATCTCACTGTC(A/G)TCTTCATTTAGTATAAATATTTTTAGACAAATAAGTAGTACAATATTCCTCACAGTATTTTAGTAAATTTACATCACTTTCTAAAGGTTCAAAAATATGACATTGTCATTAAAGCTATCCCTATAAACAGCCTACCATGTCTTCTATGTG
Unigene0046094	60	A	-	G	NNNNNNNNNNNNNNNNNNNNNNNNNNNNNNNNNNNNNNNNNNNNNNNNNNNNNNNNNNNNNNNNNNNNNNNNNNNNNNNNNNNNNNNNNNNTAGGCATTATATGTCATAGGCATGTCATTTTATTTAATATACTACCAACATTAAAGTAG(A/G)TGAGGTCCACATAAATAACATTTCAATCTCTAAATAACAATTTTAAAATCAAGTGAGTCAAGTATTGGCATGTAAAGGGGGATAAACAATGAACATGGATGAATAATCCACTTAGCTCTATAAATTGATCGTATCAAAGTTTAAATTCCT
Unigene0046152	1423	A	-	G	TTTGTGAGATAACATTAATATTTTTAGTTAAAGGTATACTACTAGTATTCTTGCCCCTTGCCTGATTTGATGATCAAGTCAATTTTCTATTATTGTATATGTATCTACTAAAAGCATTTATTTGCCAGTATATAAATAAACTTTTACCCT(A/G)TCTAGAGAAAATGCAACATCCAGCTTATCAGAGCCTAGGTTAAGAAATTGTTCTAATATTTTGTATGAGAAACCCTAGTCTAGTTACAATATATGTTAACTATAANNNNNNNNNNNNNNNNNNNNNNNNNNNNNNNNNNNNNNNNNNNNN
Unigene0046892	44	T	-	G	NNNNNNNNNNNNNNNNNNNNNNNNNNNNNNNNNNNNNNNNNNNNNNNNNNNNNNNNNNNNNNNNNNNNNNNNNNNNNNNNNNNNNNNNNNNNNNNNNNNNNNNNNNNGACCTATAAAAAAAAGTTCTTAATTTCAAGGAATACAAAGAAT(T/G)CAAACTTACAATAGAGAAAGAGATGGAATTTAAAGTACAATGATGATTAAAAAAATCAAAATACAAATTATACCATGTTTTGATTAACAAAAGAAATTCTCTTAAAACTTAGGAAACTGTACTTGGTCACCACATCTACTCCTTGGCAAC
Unigene0046892	45	C	-	G	NNNNNNNNNNNNNNNNNNNNNNNNNNNNNNNNNNNNNNNNNNNNNNNNNNNNNNNNNNNNNNNNNNNNNNNNNNNNNNNNNNNNNNNNNNNNNNNNNNNNNNNNNNGACCTATAAAAAAAAGTTCTTAATTTCAAGGAATACAAAGAATT(C/G)AAACTTACAATAGAGAAAGAGATGGAATTTAAAGTACAATGATGATTAAAAAAATCAAAATACAAATTATACCATGTTTTGATTAACAAAAGAAATTCTCTTAAAACTTAGGAAACTGTACTTGGTCACCACATCTACTCCTTGGCAACA
Unigene0047387	112	A	-	G	NNNNNNNNNNNNNNNNNNNNNNNNNNNNNNNNNNNNNNNTAACACAAATTAGATATATTAATTCCATATATCAACTTCAAAAAATAAAAATATAAAAGTAGAATCCGATATCAGTGTATCTAGCAAAGTATCTAGCAAACCACTACTTTG(A/G)TTCCTAAAAAACCTCTCCATTTTTTTCCTTCAAAATTTCTCATCAGTTTCAGTACTCGTTTGCCTCATAATCTGCAACATTAACAAAACGTGCTTTTTGGTAAAAGCTCAGTTGGTACACTGAGAAAGAATATGAGTGACCCTTCATCGC
Unigene0047567	125	A	-	G	NNNNNNNNNNNNNNNNNNNNNNNNNNAAGCACTTGAAATTTTATCTCAACTAAATCAATATCAGCCACAAAAACATTCTTCTCATATTCTCTTTATTTTCCAAGCTTTAGATACAATGATCAAGTTTGCAACAAGCAAATTCATGACTAT(A/G)TCTATAATTTTTCTTCTTCAACAAAACTTAGTATGTTCAGAATGTAGCTGTGAAAATGAAGTACAAGATTCTAATCATAAAGTATCCGAGGCATTGAAATACAAAATAATTGCTATGGCAACAGTTTTGATTTCTAGCTTAATTGGTGTG
Unigene0048010	2099	A	-	G	TTAAAGTAGGACTTAGGAGCTGACAATGTTATGTTTGTATCCATCTTTGCAAAATAGCACTAGCATGATATTGCAATTGCTGAGTGGTCTTTTTCTAGTCTTGGTCCTAAAACTGTGTGTTTGTTGTGAATCATGCTTTTAGTCTTCATT(A/G)TCACCTTGAGTCTTGTAGAATGATGATTAATAAGAAATGAAGTAATCAGGATTTGGNNNNNNNNNNNNNNNNNNNNNNNNNNNNNNNNNNNNNNNNNNNNNNNNNNNNNNNNNNNNNNNNNNNNNNNNNNNNNNNNNNNNNNNNNNNNNN
Unigene0049095	1347	T	-	G	TAGCCGAGAAAGGAAAAACAAGAAAAGCTATAGATGAAGTGAAATAATGATAGTTTTGAAGAAAACCATAAACCGATCTTCTCAAAATCTTGCATGAAACTTCCATATTGGAGTAACGAATGTTGAACCAAGTTGCTTCTTAGTTCAAAC(T/G)ATAGAATACAAGACTCAAGTATGTATAGAATATTGAGGTGTTGGTGTTTCTTTTTCTGTCATAGAAGAGTTTGTTCTTTTTTATGATAATGGTTGGTTAGAGAGATCAAAAGTTGGTGTTTTTGATGAATAGATAGGCCAACAAGAAGAA
Unigene0049579	525	A	-	G	TGACACCCTCAATATAACTATCTGTGGTTTCAATTGAAAAGCCAAAGTTTGTTTTCCAGCTACAACATCTTTCAATCTTAGTTTAAGATCACTTTCACTACTAATCAAAGACTTTGTCTCAAGTTCATCTTCTAATTCAGAAATGTTCAT(A/G)CAGAAACAAGTGTTAGAACAAGAAGAAAGACAAAAATTTCCCAACATCCTCCTTAGCTTCCCCATTCCAATGTCTTGAAAATTTGACAAGGTTTTTGAAAGAACCAATTATGTTATAATAACAAGGTGGAGAGAGACATGAAGAGAGTGT
Unigene0049773	12	A	-	G	NNNNNNNNNNNNNNNNNNNNNNNNNNNNNNNNNNNNNNNNNNNNNNNNNNNNNNNNNNNNNNNNNNNNNNNNNNNNNNNNNNNNNNNNNNNNNNNNNNNNNNNNNNNNNNNNNNNNNNNNNNNNNNNNNNNNNNNNNNNCGAGGAAGAAA(A/G)AATCTGTGGAGATGAGCATGACGACGTATCTTCGCCTTCGGAGACACGCCTCTCTCAACTCTCTCTCCCTTCTCCACTTCCACAACTCACCGCTTTCCACCGTCAGATGCTCTTCTTCTTCTTCGTCATCGCCGTCATCTTCCGGTAACA
Unigene0049773	14	A	-	G	NNNNNNNNNNNNNNNNNNNNNNNNNNNNNNNNNNNNNNNNNNNNNNNNNNNNNNNNNNNNNNNNNNNNNNNNNNNNNNNNNNNNNNNNNNNNNNNNNNNNNNNNNNNNNNNNNNNNNNNNNNNNNNNNNNNNNNNNNCGAGGAAGAAAAA(A/G)TCTGTGGAGATGAGCATGACGACGTATCTTCGCCTTCGGAGACACGCCTCTCTCAACTCTCTCTCCCTTCTCCACTTCCACAACTCACCGCTTTCCACCGTCAGATGCTCTTCTTCTTCTTCGTCATCGCCGTCATCTTCCGGTAACACT
Unigene0050232	101	A	-	G	NNNNNNNNNNNNNNNNNNNNNNNNNNNNNNNNNNNNNNNNNNNNNNNNNNTTCATTCAAAAAAACAGAATACAGCCAGGATAACATAATAACAAATTACTAATTGATTATTGAATTAGCCTAGGTACAAGTGAATCTTAACAGCGAGAAA(A/G)AAAATGCAAACGAAACCAAAATAGAGAAGAGAGTGAATGAGTATCGAAGCACCACTTGTCTGAAAGTTTCCAAACTCAACGCATCTCGACCGTCCAGGTAACTGAAACAACAATCCCGGCGTCAACAAAACAAACAGCACAATTGAAACA
Unigene0050519	1155	A	-	G	AACTCATTCTTCCTTGCTTCTTTTGCCAATTCTTCCACTTCTTTTCTTGCATCATCCTTTTGAAGATTCTTGTCTTTCTTGATTGACATAGTTCTTGCCAATCCGTTTACAAAAGATGGGAAATTAACCATGATAACAGATTCTTTTGAT(A/G)TGCTTTGAGCTTTGGAGTCACCACGGAAATCCTATGGCTTGAGGATTTAAGAAACGGATGCTAAGTAGTAATATGGTACTAAATACTCTTGATAAAAAGTTTGAAAACANNNNNNNNNNNNNNNNNNNNNNNNNNNNNNNNNNNNNNNNN
Unigene0051070	373	A	-	G	ATTGTTCCATCTCAGATTATAGGCAAAAATCTTGGTCCAAAGTTCACACAGTAATATTCACTTATAGAGATTAGAGGAATTAGATGTAGTAAAATTATTCTACCTAAGGTAATTATGGTCATAATGTTATAGGAGGCTTGCTTCATAGTT(A/G)TTATATATATAAATATGCAAGCTTTGGAATTCCTTGTTTTTTTGGTGAAGAACTTTGGAATCCAGATTGATATCTAAATCCAGCTCATATTTGCACAAGAAGAATAAATTGTGACATATTTGAATAGGGNNNNNNNNNNNNNNNNNNNNN
Unigene0051619	109	A	-	G	NNNNNNNNNNNNNNNNNNNNNNNNNNNNNNNNNNNNNNNNNNACCACACTCACCCGGAATCACCTATACCAAAATTACCACAAAAACACATCAAAACTAATCTCAAAACCAAATCTTTTCATCCCCAAAAAGCACAACACAAAGAACAAA(A/G)AATCAAAGTATATTCATGCATCTCCAATAAGCACAACACAAAGAACAAAGAATCGAAGTATTTTCATGCATCTCCAAAAAGAACAAAACAATACACACAAACTCACAAAAACAATGAAAGAATCAAAGTATCAAACCTTGGTTTCACAGG
Unigene0051779	665	A	-	G	GATGACTTGAGTAAGCCTGGAAGTCCCTATAATATTGCTTCAATTAAAAGGGTTAGAAAGAAGAACGATACTGAAGATGTATATGAGGCTAAAATACTAACCTCAAAGCCCATTGAATTGGAACAGCACTGGCAAAAGGATGACACATAT(A/G)TATACGGTTTTGGTGTCTATCTTTGCAACATGACAACATTTATTCGTATATGGAATGCATTAAACTCAGATCCAGATGGCCCAAGCATCCATATCATTAAGCAACTTTTCCAACCTAATTCTGGTGTTGGAGAAAATTGTGCTCAATGTT
Unigene0052520	37	A	-	G	NNNNNNNNNNNNNNNNNNNNNNNNNNNNNNNNNNNNNNNNNNNNNNNNNNNNNNNNNNNNNNNNNNNNNNNNNNNNNNNNNNNNNNNNNNNNNNNNNNNNNNNNNNNNNNNNNNATTAGACAGTGACCAACCATTCTTGTGCATGCTTCG(A/G)ATGGTTCTTCTATCAATGAGGGAAGAGGATGGTGAGGAAAAAAATATGCTGATCAGGACTATGAATATTGAGGATGCGATATCTGAAGGAGAGAAACCATGCTCGGCACTTTTGTGGAGTGTTCTATCACCTCTTCTTAACATGCCGGTT
Unigene0052977	64	A	-	G	NNNNNNNNNNNNNNNNNNNNNNNNNNNNNNNNNNNNNNNNNNNNNNNNNNNNNNNNNNNNNNNNNNNNNNNNNNNNNNNNNNNNNNNTAATAAGATAAAAACATCAATACATGGATTCAAAACAGTTTTCTTCTAGTACATTGACTCCCC(A/G)CATAGGATATTTCCAATACACATGATGGTAACGAGCTTATTCATATACAAAGCTAATTATCATCAGCTGTTTAAAAATGACTTAGAAAAATAACATATTTCATTAATACATTCGAAACTTTTCCTTAGTTTTCTCAAACACTTCTTCAGC
Unigene0053086	69	A	-	G	NNNNNNNNNNNNNNNNNNNNNNNNNNNNNNNNNNNNNNNNNNNNNNNNNNNNNNNNNNNNNNNNNNNNNNNNNNNNNNNNNNAGTTTTCTCATCTTCATAAGCTAAATAAAAACTAGATAATCTTAACTCTTAACCATGGTTCTTTCACA(A/G)ATTGACTATTTTTTTGCGGAGGAGACATCAACTTCTCCCTTGTTTGGTTTCATAGACCTTTTCCTAGGTTTAACATTTTTCAACAAAATCCACAAGTTTTTCTCAAGTTTATGGTTTTTCCTTTTCTGTCAACTTCAATATGGTAGCTCC
Unigene0053484	137	C	-	G	NNNNNNNNNNNNNNTTGATAATACATATTAAATGCATAAGAAGCATTCCCTTCAAGACTCAAACCATTACAAGATGAACCATATCCCAATGCAGTACAATCTGATAAACTACAAGCATAATCAATACTATTAGCCAAGTAATGCAAATTA(C/G)TAGCATCAGGATCCAAAATACACCACTGTTTTTCCATATACTTCACACCTTCAACTGCTACTAAACCTTTATCATTCTGTAAACCTTTTAAATCCAATTGATACTTTGGTTTTCCATCAAACTCCAAAATCCCCCAATGTCTCTCAAAGN
Unigene0055805	74	T	-	G	NNNNNNNNNNNNNNNNNNNNNNNNNNNNNNNNNNNNNNNNNNNNNNNNNNNNNNNNNNNNNNNNNNNNNNNNNNNNNATCGTCACACAAACAACACATCAGAACATAATCTTTCGAGAAAACAAAAACAACAACTTCCATTTTAGTGATG(T/G)CAATGAAGAGACAAAGAAGCAACGAAGGAACAGTAGACAACATAGATTTAGCAAACTGTTTAATGCTACTCTCTTGTCCACAACAACAGAAAGCCTTTGAAAACGGAGTATACGAGTGCAAAACATGCAACAAAAAATTCTCATCTTTTC
Unigene0060336	240	C	-	G	TCACTCCTCGATCACGAAATGCTGAAACTAGTGACTTCAATTCCTCCTTGTTGCCATACTTGGATGTGTCAAGATCATATAATCTTTTAGGCAGGTAACCTTGAGGACCGTCGTCGTGAGAGTTGGAGGGAGGAGGAAGCCAAACATATT(C/G)AACACCAGCATCTGCTATATCAGGTACCTTAGTCTTCAAGAAATTCCACCATCCTCCTTCTTTTTCAGCTGATGCCCAGTTGAAACCCTGAAATAGTATGGTAGAGGAGGAAAAAGAAGGGAACATGGAAATGCAAAGATAAAGAAAGCA
Unigene0066640	101	A	-	G	NNNNNNNNNNNNNNNNNNNNNNNNNNNNNNNNNNNNNNNNNNNNNNNNNNTTTAAGGCTTGGTGAATTGAGTAAATTCCCAATTCCATGCTTGTTTTTGGTAATTCTGTCTTGTAATTAGGACAATAAAGTTGTGTTGTGTAAGAGGGTG(A/G)AAAGCTGAATCTGAAAAAACAAGCATGGAAATGGAACTTTTTGCGACAAGTTTGAAGAGAATGTGAGGACCCCATGAGTTTCATTTATTGGAGCCACCAAAGGACAAGTACAGTATGTATCTATTTATGGCTAAATGTCAAATGGGTTCA
Unigene0068767	216	T	-	G	AAATTTTGTTACTCTCACTTGTTTTCCCTTTCCAGAAATCCATCCAAATCTCTCTTGTTCCCATTTCATTCCTTCTACGACTTCCAAACTCAATCCAACACTCATCTCTTCTCCCACATCTTCACCACTCTTAAACCAAACCACTCCATC(T/G)ACCAATCTATTTTCATCCCAAACAGCATCTTTTCCTGCAACCTTAACAACTTCTGTTTGAATATCANNNNNNNNNNNNNNNNNNNNNNNNNNNNNNNNNNNNNNNNNNNNNNNNNNNNNNNNNNNNNNNNNNNNNNNNNNNNNNNNNNNN
Unigene0069314	101	T	-	G	NNNNNNNNNNNNNNNNNNNNNNNNNNNNNNNNNNNNNNNNNNNNNNNNNNAGTACTCTATGCTCAACACTTTTGAACTTGTCATTGCTGATAAGCTGCATGAAGTCACCTATGTTTGCCACTAATCCTCCATGAATTGGAGTAATATCAA(T/G)CCAATGATTTTGATGGAGAACTTGGAGTCCACCAATGGTGTCTTGGAGGAGAATTGTGAGGGTTGATGGATCTGAATGCTTTGTAGTACCAAATGTTAATTCTGGTTGTGGACAAGGAGGGTAATAGTGACACCCCACTATTTCACTTTT
Unigene0078775	80	T	-	G	NNNNNNNNNNNNNNNNNNNNNNNNNNNNNNNNNNNNNNNNNNNNNNNNNNNNNNNNNNNNNNNNNNNNNNNACTTGGAGCTATATCAACATAAGCATCATCATCATCAGATTCACTACTTGTAGGTTGAACCGAATTATCGATTTTTGCC(T/G)TTACCAATTTTCTTGCACCAATCATAAGAAAATAAAGAATAGTACATAATCCTGCAAAAGCACCAACTGATCCAATTATCAGAAATGTCATCAATTTCCAACCCTTTAAGCCTTTTTCTCCATCATCAACAGAAGATTGATTATTCTTAG
Unigene0079762	63	C	-	G	NNNNNNNNNNNNNNNNNNNNNNNNNNNNNNNNNNNNNNNNNNNNNNNNNNNNNNNNNNNNNNNNNNNNNNNNNNNNNNNNNNNNNNNNGAAAGGCCTTACAAACTAGAGTGTCGTTGTTGTGTTGATTGATTGCAAAGAAATGGACAACA(C/G)TAAAATTCAATCAGTCTACCGCAATCCTGTCATATTGCAGAGTGAGGACTTGACAAATTATATATTGGAGACTGCTGTTTATCCTAGAGAGCCAGAGATTCTCAAAGAGCTGAGGAAAGCCTCTGAGACTCACCCTTGGGGTTTCATAGC
Unigene0081861	353	C	-	G	TGTAATGAGAGTAAGTGTTCTCGCTTAGCAAATGATGAATTAGAAGCTCAAAAGTTATGGAACAACACTCATGCATTGCTTCAAAAACGACTGCATCAAGCAACAATTTGAAGCAACAATATTCTATATATAAGAGTTCAAGGGGCTTTA(C/G)TGTTTTAGTATCCCCTTCATATGTATAGTTGGCCACATTGGTTTTGTTGTACAAATAAGATATCAACATGTATAAATAAAGTATATAACCATTACTATAATAAAGTGATTGGTGGTTACTCTCTATGAAGCAAAAATGAGNNNNNNNNNN
Unigene0082311	1253	T	-	G	TCGAACAAGGTAGTCAAATTGCAATTAGACAAATTCCTCCCTCTTCTGAACGGTAACACTTGGTTAACCAGGTGTAAATGCCAGCCATAAAATAATAAAATACCACATAAGTAAATATTAACATTGGAACAACTTCTTTGAATAACATTA(T/G)AAAACATGTTAAAGAGGCAAGAAATTACCATTCATGAACAAAGTAATCATATAGAAGATTCAGATCATAATAAAGATATATCCTACTGCTATGTGAAATGCAACATTTGGTAATTGCACAACTGAATCTTCAATTAGTTTCTGAAAATAT
Unigene0082528	63	A	-	G	NNNNNNNNNNNNNNNNNNNNNNNNNNNNNNNNNNNNNNNNNNNNNNNNNNNNNNNNNNNNNNNNNNNNNNNNNNNNNNNNNNNNNNNNTGAAAAATATTACAGCCTTTAGAGGTAGCACTAGCAATATTTTGAAATTGAGGATTTCATAC(A/G)AATCGCGAACACATGAAATGTCTTACAGCATTATAGAGCCAATGAAGAGGGAGATTCCGAGACATTTTGTAGCCAATTCTTAAAATAGTTTTGACAATCTTCCTCGGCCTGAGAGATAGCAGCAAGAGGGGTGACAGTAATATATCCTTC
Unigene0083479	20	T	-	G	NNNNNNNNNNNNNNNNNNNNNNNNNNNNNNNNNNNNNNNNNNNNNNNNNNNNNNNNNNNNNNNNNNNNNNNNNNNNNNNNNNNNNNNNNNNNNNNNNNNNNNNNNNNNNNNNNNNNNNNNNNNNNNNNNNNTAAAATGTCTTCATTTGTT(T/G)ACTTGCCCTAATGACTGCATGAAAAATACTGTTAAATGATTATTGCATTACATCTTCTCATATAGATTTTCTTGCACACAGGAGAGGAAAAAAAACTGTGAAATGGCCAAGAGCAATTCAATGAACAAAGGGTGCACCATGTCCTCCTTC
Unigene0085234	65	A	-	G	NNNNNNNNNNNNNNNNNNNNNNNNNNNNNNNNNNNNNNNNNNNNNNNNNNNNNNNNNNNNNNNNNNNNNNNNNNNNNNNNNNNNNNCTTCAAGCATTCTCACCACTTCTCCCATTGGTGGTCTCATTGAAACATCATCTTGGATGCACCA(A/G)AAGGCAACATTCAAAGCTCTTGTTAGTTCTTCCTCATCCACTGCCCCATTTAATCTTCTATCTGCCACTTTGATGGTTGATCCACTTGTCATCTCCTTGTAAGCCCAACCAGGATAGAAAAAATCTTCTGCATCAAAGGACAAATCAAGA
Unigene0085475	50	A	-	G	NNNNNNNNNNNNNNNNNNNNNNNNNNNNNNNNNNNNNNNNNNNNNNNNNNNNNNNNNNNNNNNNNNNNNNNNNNNNNNNNNNNNNNNNNNNNNNNNNNNNNAGGTATATGCATGTGGATCACCGATTGTTACATTCATGAGCAATTGAGC(A/G)CTCTTAACGGAAGATAAATTAGTTCCTTAATCAGATTTCTAATGATTTAGGAAAATATTTCAAGCTTGAGGCTCAGATACATATCTGTGGAAAGAAGAAAGCATCAGGCAACAAGATTACTGGCATTCAGGTTAGAATCTAGAAATTCTT
Unigene0085630	84	T	-	G	NNNNNNNNNNNNNNNNNNNNNNNNNNNNNNNNNNNNNNNNNNNNNNNNNNNNNNNNNNNNNNNNNNNCTCTGTTGCAGTTCATTCATAAGCAACAAAAATAAACAATAAGAGCAATGTTGAAAAGGAAAATGAACATTTTCATTCACAAG(T/G)TCACACACACTCACACTTAGGATGTCAACATTTCAAGGGCTACAACAAATGTGTCGCCATTTTTATTTCCATTTCATAACAAATATCTTATTATTAGGACAATCACAATAACTTATAACATTTCACTCAAGGTTGTACACTCACACATTT
Unigene0085994	1489	C	-	G	ATTTCAATATACCAAAGCAAACAATCGAACCTAATAAAGTAAGGCATTTTCTAGCAAAATTTGCATTTTTGGGTATTATGCTGTATATCGATCGTCATATACTGATGCAAGGATAATACAATGAACAACCTTGTAGACATGTTAGTTATA(C/G)AGACATGAGAACACATATTCTTATTAGTAAATCAATATTTGACTATATGTCAATCCCTCTTCCACAACTACCTCGGTAAGAAAATACTAGAAACAAGTTATACTCATATACCTCTTCTCTGAGCCGGATATGGTAATGACCAAGCTTAAA
Unigene0086553	1870	A	-	G	TTAAAGTGCATTTTTCAACTATTAACAATAGTATTTAAATTTTAAGTTGGTGCACGTGACAAGGTTTTAGTTCATCATTACCTATTATGTTTCTTATAAAAAGCAAGTTGATAGTTTTCTTCTCGAGCATTGTTCAATTTAAAAGATGGC(A/G)CACAGTTCACGTTAAGCTCGACATCTGCTCACTCACTTTGGTACTCATACTTATTACTTTAAATTAGAAAGATTATAAACAAAATTTTGATGAATTTTATATTCATATATATCTTTAAAGAAAAAAACCTTTGGACTAATTTTTTTTAAG
Unigene0086831	450	A	-	G	AGATATAATGGCTTCTCCAACTGGATTATAGAAACTAGCAATAGAGAGTCTACTTCCATTCTTATCAGGCATGACCCTATGCACAACACTTTTGTATAATCCATTGCTCAACACTTCGATTTGATCACCTGTGTTGACAAAAATCGCGTT(A/G)TTTTTTGAAGGTGGTATCTCTATCCATTTTCCATCTTTGAAGAATTCAAGACCAGGTACTTTGTCATCTTGAAGCAATAGGATGATTCCACCAGCATCTGTGTGCTCTCTCAAACCTCTCACTAATTCTGGAAATGGACATTCAGGGTAC
Unigene0087135	106	A	-	G	NNNNNNNNNNNNNNNNNNNNNNNNNNNNNNNNNNNNNNNNNNNNNTTTTTAGGAAAAAAGATATCATTGAGATGGCATTTTTCTTATAACAATATAAGGATACAAAAATGTAAAGACTAGAACAAAACATATAATGATACAAAAATGTAA(A/G)TACTAGAACAAAACATAAGAACCTGACCCCAACCAATATAATTCTAAAGCCACATTTATTCTATGCCCAACCTCCTAACAATCCCAACCCCACACACAACACAAGATATTGCTTCAAAAGATTGGTCCAGCTGCAAGAATCTCTTCTGTG
Unigene0000656	110	A	-	T	NNNNNNNNNNNNNNNNNNNNNNNNNNNNNNNNNNNNNNNNNAAGACATTGATTTTGTAGTATTTTTTGTTTATGTTTTTTGAACGTGTGAAACTAGTATACTAGAATTTTTGTGATGATGACTCTTTCTATGAATGCAGAGATGGAGAGC(A/T)TGAGAACACCTTTCAGAGGGATTGTAAGTGATTTTAGAGGAAGAGCGTTGCATTATAAAGATGATTGGGTTTCTGGTTTCACTTCAGGAACTGGGATATTGGCACCAACTACGTATATTTTCTTTGCTTCTGCTCTACCTGTTATTGCTT
Unigene0001365	70	C	-	T	NNNNNNNNNNNNNNNNNNNNNNNNNNNNNNNNNNNNNNNNNNNNNNNNNNNNNNNNNNNNNNNNNNNNNNNNNNNNNNNNNGGCGGAGCATCACTCTGGTGCGAGGGTTTGGGCTCTTGGTTGGGACTTTAGACTCTATGGTCCTCTCTT(T/C)ACGGGAATAGTTACCTCAGGAATAACATATTATGTGCAAGGTTTGGTATTGCAAAGCAGAGGCCCAGTATTTTTCACTGCATTTAATCCTCTTTGTATGATCATCACTTGTGCTCTAGGCTCATTTCTTTTCGGAGAACAACTCCACTTG
Unigene0001781	1807	C	-	T	AGGACATGATAAGCCAGGGGAAGCTTCCTGAAATTTCTGTTTGGAGTTCATTAGCATCTTCATTTTGTAATTCTGAGATGAAGAAAGTGTCAGTCGAGATGTTTAATCGCCTAAGAAGTTTGTGATTCTGAATTCTGGTGTAAAATATAA(T/C)GATTATATAATAAACAGAATCGTGTACTTCCATTTTTTCGAATATAATTATGCTTCTTCATTCGCTTTTAAAGCATTGCTTTATAGTTCGGTCTTTTCCGAGCATCAAGCCTGCAGGTTACGTTCTGAATGACCGAGTAGCCAAACTATT
Unigene0002558	48	C	-	T	NNNNNNNNNNNNNNNNNNNNNNNNNNNNNNNNNNNNNNNNNNNNNNNNNNNNNNNNNNNNNNNNNNNNNNNNNNNNNNNNNNNNNNNNNNNNNNNNNNNNNNNAAGCAAGTGATATATATGACTTGAAATTCTTGTCAGTGAGTGAAACA(T/C)ATTCTGTTTCATGATTTTTTAGTACATCAAATAACTATGTAAAGATTATCAGATAGGAAACAGATACATCATACATCTTGCATACATACATGGAAAAGGTACTCAAATTGAAAACTAACTAATTTATTTGAAGGGTGCTTAATTAACCAT
Unigene0003009	1268	A	-	T	TAGAATATTTGCGGTGTTTTGGATATTAACCGGTACTATTTGCGTAGCTCAGTTTTTCCTCTACATGGCTGAACTAAACACTGAAAGTAGACAAAAGGCACTTGTCAGATGGGTTCTTACCAGGAAAATGACAAATCACGATTTGGAAGC(A/T)GCTGATCTTGATGAGGATGGCACTGTTGGGTTAGTTCATCAATTTTCGTCACAGCGAAAAACTAAACACATATGCTTATACACTTATTTACTGTGACAACATGTTATACTATGACTCTTTCAAAGACTTACAAAATGTGTTAAACTTGTT
Unigene0003145	63	G	-	T	NNNNNNNNNNNNNNNNNNNNNNNNNNNNNNNNNNNNNNNNNNNNNNNNNNNNNNNNNNNNNNNNNNNNNNNNNNNNNNNNNNNNNNNNAAAATTCATAGTATGCTATTGAAGTGTATAAGTTCAAACATAAAGGGTCTGATTCGCAACTG(T/G)GAAGATTAATCTTTACGGTCAGACTGGACTAGATGAGTTCAAAAAATCAGATTTGAACTCGAGATAAGCTCGAAGAGACTTGTACAACCTCATACCATATTCTAAACCTAAATGAAGAGCTATAAGAAAACAAAACTTGTGCAAACTATT
Unigene0003729	41	A	-	T	NNNNNNNNNNNNNNNNNNNNNNNNNNNNNNNNNNNNNNNNNNNNNNNNNNNNNNNNNNNNNNNNNNNNNNNNNNNNNNNNNNNNNNNNNNNNNNNNNNNNNNNNNNNNNNGAATAGCTAAACAGTGATTCTGTCTTGCAGTGATTCTCCT(A/T)TAGCATCTGTCTCTTTGATTATCTAATCATTAGATACATAAAATCATTTGTTTGCTCATCACATTTGTCATATCCTCTCTCTCTATGCAACTTGCATTCTGAATTCACCTTTTCTTATGATTTGTTACATAGAAAAAAAATTGAGAATCT
Unigene0004022	40	C	-	T	NNNNNNNNNNNNNNNNNNNNNNNNNNNNNNNNNNNNNNNNNNNNNNNNNNNNNNNNNNNNNNNNNNNNNNNNNNNNNNNNNNNNNNNNNNNNNNNNNNNNNNNNNNNNNNNCAAATAATTTATCGTTGCAATCGTGTAAGTTAGGCCCAA(T/C)ACAAACATCCAGCAAGATAACTTTTCATTCATTTGTCACTACTAATAACTATTACAAAACCTTACCCATCCAAGTAGGGAATGTTAAAATGACAATATATATTCGGTAGTAACATGAGATCAAGAGATGAATAGATATGACTATAACGAA
Unigene0004172	1648	C	-	T	CTGTAAAATTTTAATACAAGACTTATACATCATCTATTTGCTTCTTCTTTTTCCTGTACATTATTGTATGAACGAAGTCTGCAACAACATTGGTTTTATGCAACACTTGCTGCCAGTCATGTAATATTCACAAAGATTTCTTGAGATTCA(T/C)AGATTTTTCATCATATTTAGTTTTATGGTTGTTTTTTGTGTTCTCTGTACCAATTTCTTTCTGTGTATAGAAAAAAATTTCTTAAACAATATTTGGGNNNNNNNNNNNNNNNNNNNNNNNNNNNNNNNNNNNNNNNNNNNNNNNNNNNNN
Unigene0004173	10	C	-	T	NNNNNNNNNNNNNNNNNNNNNNNNNNNNNNNNNNNNNNNNNNNNNNNNNNNNNNNNNNNNNNNNNNNNNNNNNNNNNNNNNNNNNNNNNNNNNNNNNNNNNNNNNNNNNNNNNNNNNNNNNNNNNNNNNNNNNNNNNNNNNGTTGGGTTT(T/C)GCCTAATCTAAATGAAGGTCATTTAGATTGGTTTTTCTTCTTGTCTGCACTTTTAACTGGTACCAATTTCGTATTTTATAGTGTGTGCGCAACAAGATATAAGTTAGTAGAAATGGAGAAACGAGAGGCGACAAATAAAGAGGAAGAAGT
Unigene0004813	100	G	-	T	NNNNNNNNNNNNNNNNNNNNNNNNNNNNNNNNNNNNNNNNNNNNNNNNNNNGAATTTTAAAATTTGACCAATGTTTTCTTATTTTCTTCTTACTTTGTATTCTCAGTTCTATTTTCTTTTACACCATTTTCTTCTAAAAACACCACTCCG(T/G)TTCCCAAACGAATCAATCCAACCCGACCCGTTATGAATGGGCGGGTAACAACACAGTGCCAGAAATGGCACAAGACAGTATAGAACTGAGAGAGAAAGCTTCAAAGCCCATATTATAGAAGGAATTTCAAGAGCCACTGCAATTCCATTC
Unigene0004874	92	A	-	T	NNNNNNNNNNNNNNNNNNNNNNNNNNNNNNNNNNNNNNNNNNNNNNNNNNNNNNNNNNNAATGTCAACTAAAATTTCACATACACAAGTCATCATAAACATTTTGAACATATCACAAAATATAGCAAAATTTCAAGTGTATCAAGCAAGT(A/T)ACCTCAAGTATATTTTCACACTCCATAGAAAATGATAACATTAAAAATGAACATTTAATCAAAAGCACCCTGCATTTTTGCTTAATAAATTAGTACTATAACTGTTACATTTAACCAAAATCATCAAGCTGGTGCAATGGAAACTTTATC
Unigene0006015	39	G	-	T	NNNNNNNNNNNNNNNNNNNNNNNNNNNNNNNNNNNNNNNNNNNNNNNNNNNNNNNNNNNNNNNNNNNNNNNNNNNNNNNNNNNNNNNNNNNNNNNNNNNNNNNNNNNNNNNNCCCTTTATGACTCTAATTTTTCAAATACGGTTTGAGGT(T/G)GGAAACTTACCATTACTAAACATCCGAGTCAAAAAATAAACCATAAGTCTTCATTAACAAAACAAAAAAATCGGCAATTAAAGAACATGCTCCAACAAATTATAGATAATAAAGCAAAAGATTGCTTTTAACATATCACAGCACATACAT
Unigene0006418	591	A	-	T	CTCCGCCTCCCCGCGAACTATCTCCGGTGGAGGCGAAACTCCCATCTCGGCTAGGGCTTTTGTGTAGTGGAGTCTTGTACCTTCGTCTGGAACTATGCACACGTGTCTTGCACCCGTGTTGCGAGCAGCAACCGCTAGGCCAATACTTGC(A/T)GCTATCGGACCGCCGTGGGAGTAACATTCGACGATGAACTTAGCGTTCCATCCGGCTGCCATGGATGATAGAAGCTCAGCTACACCAGATTCCTTGAATTTTTCACATTGTTGTTGAGGTTGACAGATACTTACGGATTTCAATTTCACA
Unigene0006419	591	A	-	T	CTCCGCCTCCCCGCGAACTATCTCCGGTGGAGGCGAAACTCCCATCTCGGCTAGGGCTTTTGTGTAGTGGAGTCTTGTACCTTCGTCTGGAACTATGCACACGTGTCTTGCACCCGTGTTGCGAGCAGCAACCGCTAGGCCAATACTTGC(A/T)GCTATCGGACCGCCGTGGGAGTAACATTCGACGATGAACTTAGCGTTCCATCCGGCTGCCATGGATGATAGAAGCTCAGCTACACCAGATTCCTTGAATTTTTCACAGGATTTCAATTTCACAGTGTCTATATATGATTTCAAGGCAGTT
Unigene0006703	367	C	-	T	CTTCTATATACCTGTTGATTACTCTAGCCAAGGTTGTAAAAAATTCATAAGGTGCCTTATTTACCGTTTTTATGATGAAAAAGAAATTGTGATTAATTCACACTAAGACGAACGCAATCAGCATCGCAACATCTGTATCGACCGAAATCG(T/C)AAAATCCTTTACACGGTCGCAATTTAAAATGAAGTGCTTTTACTATTTTAAATTTATACACAAGGGTAGGGGACAAAGATCAGCACCTGAGCTAAAAGAGCAAGAGAAAAGCCAATTTTCAGGATCTGAAAGAGTTACAAAGTCTTCTTG
Unigene0006754	387	C	-	T	ATATATAGGAGCTTTTTTAAAGTGATTTGCGGTAGCCAAAATCAACCCTACCTTTGTCTGCGAATTCAATCCAATTGTCTGAATTGCACATAAGTTTTCACTCAGCCCAACTAATTGCCTTTTGCTTTCTAATTCCTCTCTCTTTCATTG(T/C)GTCCCTCAATTTATTCACACTGCTCCATATTCCTTTCTCACCTTGGATCTTCGAAAGCATTGAGTAAGAAATAGGATGGTTGCTCTCCAGTCTTCGAATCCTCTCAGCAGCGTACTCTCCAAGTTCCAAATTTGAATGCATGCCACAAGC
Unigene0008877	1243	G	-	T	TGTATTAATTCAGACTTTGACACTGTCACGACTGCTATGATGGCTTCCCGGGGAACACATGTATATAACGATTTGTTTTATGTTTTATTGATCGGTTGAAGTGTAAACAGATAACACCTGTGGTTGGATCGTTGTTTCGTCCTGGTTTGA(T/G)CGGTTTAAAATAGTTGAACTGTTATTGAGACGCATCTTTGGTACTATGTTAAACTAATTCCTTTGAATGCAGGAACAAAAAACATTAGCACCGTCAACGGTGAACTTATCGACAGCAAACTTATCGACAGCAGCGACCAAAGCAGTACTC
Unigene0009332	52	G	-	T	NNNNNNNNNNNNNNNNNNNNNNNNNNNNNNNNNNNNNNNNNNNNNNNNNNNNNNNNNNNNNNNNNNNNNNNNNNNNNNNNNNNNNNNNNNNNNNNNNNNTAACTGTTTTATTTCATTGCTGCACTAATCGACAATTAGAGTTTCTACCCA(T/G)GTAGATACAAGGCATATTGTAATGCTTTGCCTGTGTGCAAGTACAAATAGAGTAGCATCACACTGAACAAAGTCATAACATTACTACTATTAAAAAAACAAAAAACAACACTACTATTATAAATTTATAATAAGTTAGATAAAAAAAAAA
Unigene0010229	135	C	-	T	NNNNNNNNNNNNNNNNTAATAAAGCACATTTAATTGAGTAACATGTTTTCAAATTTAAATGGTATTACAGTATATAATATATATGTTTAGTCTGAAAGTAAAAAATTTCATAAATACTTACATAATGTATTCAACAATGACAACATGATA(T/C)AATTCATCACTGAACAGAGTGACTTTCACTTGGCTGCTACTGTTGCATCCTTTTTTTTCTGGGAGGTCATCAGCCCCTTTTGCCCTATGCCTCAAATAAATTCCTACGCGTGTAATTTCTTTGTTTTTTTATACCTTTTTTTTTCTTTCT
Unigene0010823	2688	C	-	T	TGAGTCTAAGTCCACCCTACTGGTCTGACTGGAAAATAAAGTTATTTCTAAATGCATGGAGGGGAAGCAGAAGCTGCCAACTTTGCTAGGTGAGGGAGCATTGAAGCAATTTACCATTGGTTTCAGTACAATAATGTTGATATAATTGCA(T/C)ATAGTTGATATAAGTAGATAAACATTGAATCACTTTTTGCATAGTTCTCTTGTCTCATTCACACTTTTCTTGAAAGGACTATTTGTTACAAGGACCATTGACCAAAGTTGGTTGTTTGGGCATCCTCTTATGTTTGAAGATTACTGCTGG
Unigene0010841	654	C	-	T	CCGGATCAGGCTTTTTGCGGGGAACTACATCTCCTGCAAATATCTGGATTTTTTCTGCTCGCTCAGGTCCCAGTAAAAATGATACTATTGCAGAGACCTAAAATCAACTCACAATTTAAGTCCTGAGATGAAATACAAATAAATGCGGAA(T/C)ATTTAACTAGCATCTCTGATAATTAATCTACTAACGGTCGACAATCTAACAGCTCAATTCACCCGCATTGCATTTATGAATTAACTATGTAGCACCAACACTTCAGATTGAAGACGTGTTTGGTGTTTCACACATGTTGGTTAGGACTCT
Unigene0011623	108	A	-	T	NNNNNNNNNNNNNNNNNNNNNNNNNNNNNNNNNNNNNNNNNNNCTTCAAAAGTTGCATGACATAATCTACAATTGTAACATTTTTTTTGCATAAGCTAACTTGATGATGAATTAATATTCTCAAAATTCAGGTTCTGCTTGGACAATAGT(A/T)TCAAGATCATTTGCTGAGTATTGCATAATGGGTTGGGAAAATCTACCAAGAACCCTACTTCTCTACTACACAAATTTCGTCTCATCGCCAGAAGGATATTTCCAGACAGTAATATGCAACTCAGAAGATTACAAGAACACCACTGTCAAC
Unigene0011919	267	C	-	T	CGACTCAAAACTCAACACCAATAATAACTTGAAAAAATGAATAGATTAAACGTAATCATATAGATATATATCGGACACTAAAGACGTCTTTGTTGAACAAAGGTGGTGGTGCTATATAACCTTAAACCATTGTTGATATCGTTAGGTTCG(T/C)GTCTCCTTTGAAATCAAGGAGACAGAAGTACGAGTTTATAGAATAGATCATGTTCAAGATCATTGCTTATAGTCTAACTGAGTATGAACTTCGAATCATCAGGGTGGTTTCGATCCAAACACTGTCGCGACAGCAAACATTCTGGAAACT
Unigene0011919	290	C	-	T	ATAACTTGAAAAAATGAATAGATTAAACGTAATCATATAGATATATATCGGACACTAAAGACGTCTTTGTTGAACAAAGGTGGTGGTGCTATATAACCTTAAACCATTGTTGATATCGTTAGGTTCGCGTCTCCTTTGAAATCAAGGAGA(T/C)AGAAGTACGAGTTTATAGAATAGATCATGTTCAAGATCATTGCTTATAGTCTAACTGAGTATGAACTTCGAATCATCAGGGTGGTTTCGATCCAAACACTGTCGCGACAGCAAACATTCTGGAAACTTCAACACCTGTGGTGGATGGGAA
Unigene0011982	76	C	-	T	NNNNNNNNNNNNNNNNNNNNNNNNNNNNNNNNNNNNNNNNNNNNNNNNNNNNNNNNNNNNNNNNNNNNNNNNNNNGTCATTCTTGATTTATCATTCTCACTGAACAATTCTCCATAGTTTCAAATGGAACCTTTCTTCCTTTCCTCTCTC(T/C)CATTCATCTTCCTACTTTTCTTCACTTTTTCTTCTGCTCAGATGCCAGGTTTTGTGAGTTTGGACTGTGGAGGTGATAAAAATTTCACTGATGAAATTGGTCTTCAATGGAGTCCTGATGATGGAATGGCTTACGGAGAAATAAGCGCGA
Unigene0013576	1173	C	-	T	GCCTTTATTTGTCTCGGTATTATCTTACAAAGAAAACCAACCTGCAGCAACAAAGAGCGAGAAATAAAAAGGCATGAAAATTGACAGACACAGAAAATCCAAACTCCATATCACGAACCATGTGATGAGAAAAGAACTTTCCTTCCAATA(T/C)GGTAAAAGATCGGTTGACCGAGCCTCCGCCTCTTTCAGTGAAGTGTAAACAGCTTCGATAACAGGACTGTCTGAATTCAGTGCGTCAAAGTTATAGTTGAATACAGATAAACCGATAACATCAAGAGTCAACTGAGAAAACTTGTCCTCC
Unigene0014242	185	C	-	T	AGCAAATGATTCTAAACACCATTGTCAAAATTAGGCAAAAATAAGCACTCAACCCCTATAGCAGAGCACATACACCTCAAAAAAAGACGTATCTACGTTGGTGTCTGATACCGACACAAAAATTTGTGATTCATTCTTTCAAATTATTAA(T/C)GGTGTCGACATTGTCGTGTTTCTGGTGTCCGAGCTTGATAGCTCAAAACATCAATATACCTATAACATTTCACATTTCAATATGGCCACTACACTAGAATGAAACCTTATATCCCCAAATTGATTATTAAAAACCAAAACAACTTTATCT
Unigene0014391	99	C	-	T	NNNNNNNNNNNNNNNNNNNNNNNNNNNNNNNNNNNNNNNNNNNNNNNNNNNNCTACAAAATTCAATAAATATGGCAATTATAGTTTATAAGAAATATTAGCCATACATAAATAATATTTAAAATCTATCTAATTATGAATCAATGCGACG(T/C)CTTTCTTTCTTAGACTTAACAATCTCCATCTTCAACATTTCAAGTAAGAAATCATTCCATGTATCAATCGGTCCAGGCAAACACCAATGGACACAATCGTTATACAAAGTCACATTCTCTCCCGGCAAATGTCCATACTTACTTGGATGT
Unigene0015195	25	C	-	T	NNNNNNNNNNNNNNNNNNNNNNNNNNNNNNNNNNNNNNNNNNNNNNNNNNNNNNNNNNNNNNNNNNNNNNNNNNNNNNNNNNNNNNNNNNNNNNNNNNNNNNNNNNNNNNNNNNNNNNNNNNNNNNAAAAGACTTGGTTAAGAAGATGCT(T/C)GTTAGAGATCCTAGTAAACGGTTATCAGCTTTTGACGTTCTTCGTCACCCCTGGATTCAGGTTGATGGAGCAGCCCCAGACAAGCCTCTTGATTCTGCAGTTTTGAGTCGCATGAAACAGTTTACTGCAATGAACAAGCTCAAGAAAATG
Unigene0015483	67	A	-	T	NNNNNNNNNNNNNNNNNNNNNNNNNNNNNNNNNNNNNNNNNNNNNNNNNNNNNNNNNNNNNNNNNNNNNNNNNNNNNNNNNNNNTTCGACATTAAAATACTATAATAACTCTTTTTACACCGTATATACCAGAAATAAGTAAACAAAAGC(A/T)TCAAACAAGAATCTGTGACAGAACTGATTATTGTAACTGCTAATCCAAGGCACACCACATAACTTCACATAACTTAGGTACCAAACTGAAGGAACAAACCAAAAAACAATATTTACACAGAAGTTGCTTGAACAAAATTTTCTTTGAAAC
Unigene0015925	78	G	-	T	NNNNNNNNNNNNNNNNNNNNNNNNNNNNNNNNNNNNNNNNNNNNNNNNNNNNNNNNNNNNNNNNNNNNNNNNNTCTATTTATATTACTTCTTAGTTATTATACTACTGTATAGTACATGTCTAAAAAGTAAAAACTCTAATACCTAAGCA(T/G)TATAAGAAAGAAACACAAGTATTGTAACTTGAAGCCTACTGTTAGATTAGTTCAGGTATGCTTTTCAATACTGGTTTCCACTCTCCTAGAGAATCATCATCATTTTCTTTACACAAATCTTCACCATGAGCAAGAGATAACATCTTGTCA
Unigene0018383	48	A	-	T	NNNNNNNNNNNNNNNNNNNNNNNNNNNNNNNNNNNNNNNNNNNNNNNNNNNNNNNNNNNNNNNNNNNNNNNNNNNNNNNNNNNNNNNNNNNNNNNNNNNNNNNCTCGTTTAATTAAACCGTGAAGTGCGTAGTATTAAAGAAAATGCAAG(A/T)ACTGGGACATAAAGTTGAATCATTAAATCCAATCAACATTACATGACTTCCAAATCTTCATTTATCCCAACATAGTGACTCCTACCCTGTCCCTCCCCTCCCTTTTTTCTTTTAGTCCAGGCTCTGTTGAGTTTTAAGAGGTAAGAACCA
Unigene0020442	93	C	-	T	NNNNNNNNNNNNNNNNNNNNNNNNNNNNNNNNNNNNNNNNNNNNNNNNNNNNNNNNNNCCCACACCTCAAAATCCACAGGAGCGATCAACATAAAAATGACTCAACAATAACAATTGTATGGAAAATTGTTACTGCAATTTTTCCCATGC(T/C)ACAAAAATCCACTGAAGTGCTTCAAAGTTCAAACATATGGATTGCAACAAAGCATAAAATTCATTCATTCCTAGGAAAATCCCAAACAGTATTACCATGTTCCCGGTTAGGGATAGCAAACAATGGATCACAACTTACAGCAGAGTTCTT
Unigene0021035	1350	C	-	T	TAGCTGTGAGAGTGACAGCATTTGGTCTAAACCCCTCATTTATCATCTCCTCAAACAGAAAAACTGATTCCTCCCCCTTTCCATGCATCCCATAACAGGATATCATAGTTGTCCATGTCACCAAATTTGCACAGCACACGGTTTTGAAGA(T/C)ATTTTCTGAATCTTTCAAGCTACCACATTTTCCATAATTATCGATCAATGCATTCCCAATGGGAACATGAGCATCAAAACCAAAGTTCCTAACAGTAAAGCCATGCACTTCCTTCACTTTCAACAAATCCCCTTCCTTCCCAGAAGCACT
Unigene0021971	2368	C	-	T	ATTTATTGCAAGGATGAGAAATGACGGGGTTGATTTAGATCAATTTAGCTTCTCTGTAGCTCTTGCTACTATTGGTAACTTGACAGTACTGGATGAGGGTCAGCAGCTTCACAGCTGGATTATTAAACTCGGGTTTGAGTCAAATGAATA(T/C)GTTTTAAATGCTACAATGGATATGTATGGAAAATGTGGAGAAATCGATGATGTATTTAGAATCCTTCCCCTACCAAAAAGCAGGTCACAGAGGTCTTGGAACATTTTAATATCTGCATTGGCCAGACATGGGTTTTTCCGCCAGGCTACA
Unigene0021971	2449	C	-	T	GACAGTACTGGATGAGGGTCAGCAGCTTCACAGCTGGATTATTAAACTCGGGTTTGAGTCAAATGAATACGTTTTAAATGCTACAATGGATATGTATGGAAAATGTGGAGAAATCGATGATGTATTTAGAATCCTTCCCCTACCAAAAAG(T/C)AGGTCACAGAGGTCTTGGAACATTTTAATATCTGCATTGGCCAGACATGGGTTTTTCCGCCAGGCTACAAAGGCCTTTCAAGAGATGCTTGATATTGGTCTGATACCTGATCACATCACGTTTGTTTCGCTTCTGTCTGCCTGCAGCCAT
Unigene0022334	98	G	-	T	NNNNNNNNNNNNNNNNNNNNNNNNNNNNNNNNNNNNNNNNNNNNNNNNNNNNNCAGAAACTTGAGCAATTTATGCTGAGATATCCGCCACCATTACAAAAGGGACCAAAACCCTGAAACTCTTGAATCAAAAGTAAACAATAGTAACTGG(T/G)AATAAAAGTCATGTAATCAACCCATTTCACACATCACATAAAATTTAACATGTGTTTGGTAAACTCGAAAATATCACCTGTTCGTTCAGCTCTACATCGGCGTGAAACCAAACATGCTATAAACCTTTCCTAACATTGTACAATTTGTAC
Unigene0022392	60	A	-	T	NNNNNNNNNNNNNNNNNNNNNNNNNNNNNNNNNNNNNNNNNNNNNNNNNNNNNNNNNNNNNNNNNNNNNNNNNNNNNNNNNNNNNNNNNNNTTTTATTCTAGTCTTACAGTTTTAGCTGTTGTCACTTGGCAAGTATTGATTGTGGCTAT(A/T)CCAATGGTTTACGTTACAATTCGCTTGCAGAAATACTACTTTACCTCAGCAAAAGAAGTGATGCGGATGAGTGGCACAACAAAATCCTGCTTAGCTAACCATGTAGCTGAAACTGTTTCTGGAGCTGTGACAATACGGGCTTTTCATGTG
Unigene0026006	394	C	-	T	CTTCGGCAACATTGATATGCAGCTCAAGCTTGTACCTGGAAATTCTGCAGGCACCGTCACTGCTTACTATTTATCTTCAAAAGGATCAAACTGGGATGAGATTGATTTTGAATTCTTGGGAAATGTAAGTGGACAACCATACATTCTTCA(T/C)ACCAATGTGTTCAGTCAAGGAAAAGGAAATAGAGAGCAACAGTTCTATCTATGGTTTGATCCAACTGCTGATTTCCACACCTACTCCATTCTCTGGAATCCTCACCATATTATTTTTTCAGTGGATGGAACAGCTATAAGAGAATTCAAA
Unigene0026015	219	C	-	T	CATTTCTCATAAAAGCATTCACCAAAATCTGGAAAAAAGTTTCAACAAAGAAAAAAAAGCCAGAAAATAATCAAATAAGTACAAGTGAAATGGTGCATGTGTGATAGGTGTTGCTGTATATGCTTGACACCAAATCAATGAAGAGATTCA(T/C)AATCAATCTACCTCAGAAATTTTCTCATTTATAATAAGCAAACTGAGTGAAAAAAATCATATCAAAGTTTTTTCTTTTCCTTTCAAATTCCTAGAGGCTTTTCATTCTGATATGGCAGCATCATTTTCAGCAGCATCTTTCTTTACAAGC
Unigene0027468	246	C	-	T	GGGTATTTCTTACATCTCAAACCAATCACCCTTTATCATCCTTGATATGTTCAATCTAAGAACAATCAATGTTGATATACAAAACGAAGTTGCTTTTATTCAAGCTGGTGCTACTCTTGGTGAAGTTTATTATAGAATTTACGAAAAGAG(T/C)AAACTTCATGGCTTTCCTGCTGGTGTGTGCCCAACTGTTGGCGTTGGTGGTCACTTTAGTGGTGGAGGGTATGGTACCNNNNNNNNNNNNNNNNNNNNNNNNNNNNNNNNNNNNNNNNNNNNNNNNNNNNNNNNNNNNNNNNNNNNNNNN
Unigene0029721	53	C	-	T	NNNNNNNNNNNNNNNNNNNNNNNNNNNNNNNNNNNNNNNNNNNNNNNNNNNNNNNNNNNNNNNNNNNNNNNNNNNNNNNNNNNNNNNNNNNNNNNNNNTCACCCTACCGACGATTGACCTATAATGTGCCTTTCTCACCAATTTCTCTCT(T/C)TTTTTTATTACAAATTAATGAAAAAATAAAAGGAAAAAAACTTTTTGATGTTGTTATTCTTTTTACAGAACTTGTGTCACTGTTGGAACACTAATATTATACAAAATCTGCTTCTATATTCACTTGCAGTATAAACTCCATATTGAATAT
Unigene0030315	180	G	-	T	TCTTTCCTTTATTCTTTACAGTAATCAATTTAATAAGAAATGCCAAAGTTGATATATTTTTCTTTACAATTTTCGGATTAATTTGGGGTTTCGTGTTTCGAACCAAAAACATATAAACACGAGATTTGAATCAGTTAGGTTTTATTTGGA(T/G)CTAGGATCAAGATTCTATTTTTTATGGTGCATTCAAGATCCAATCCTTTGGAATTTTTATAAATTTAAAATTAAAATCTAGGATGGCTTGAATTGCATTTGTAACGCTTTCTCGCTTTGGAGTTTTTGGATGATTATAGACCAATTCTGT
Unigene0030351	67	G	-	T	NNNNNNNNNNNNNNNNNNNNNNNNNNNNNNNNNNNNNNNNNNNNNNNNNNNNNNNNNNNNNNNNNNNNNNNNNNNNNNNNNNNNGCGAGAAAGAGTGGTCAAAGCGAGTCGAGATATAACAATGAATAGCAAAAAGGTCATATTTCAAGT(T/G)CACAGGATGAGTAAATACAATAAAGTGGAAGTACTTGAGAAAGCAGAAAAGGACTTAGCAGCTGTGACAAATCAGTTCGTGTCTCGACTAGTCAAAGAATTGCAGGGAACTGATTTTTGGAAGCTAAGACGAACCTACTCGCCTGGGATA
Unigene0030690	516	C	-	T	AGGAAGCATTAGATATCTTGGTTCAAAGACTCATTTCTTCACAGCAACAATAAAAAAAAGATGTAAATGATGATTATATTAGAGAGGATTAGTTAATGAGAGAAAAGAACTTGTAGAGAAAGAGTTGACATTTTGTATACATCAATCGTG(T/C)ATAGACATTCGNNNNNNNNNNNNNNNNNNNNNNNNNNNNNNNNNNNNNNNNNNNNNNNNNNNNNNNNNNNNNNNNNNNNNNNNNNNNNNNNNNNNNNNNNNNNNNNNNNNNNNNNNNNNNNNNNNNNNNNNNNNNNNNNNNNNNNNNNNN
Unigene0031114	97	C	-	T	NNNNNNNNNNNNNNNNNNNNNNNNNNNNNNNNNNNNNNNNNNNNNNNNNNNNNNCTTGTTATTAATGATTGCACAAATTACTTTGGCCATTGCTTGAACATCTATTTTGTTTAGCAATAATCATTACCATTTTTCTATCCAAAAATATCA(T/C)TGTTTAATAACTGCAAAAAAAAAAAATTCAAACTACCATTTGTAATACCTGCCAACTTGTCTACAAATTTCAAATAGCTGATGCTCAATATCTCATCTAACCATAGTTTCACATTTGTATACTTTTTATATTGTTATCATTTCAAACATT
Unigene0033264	1565	C	-	T	TGTAAATTGTACCATACCTTGCTATGTGATTCTCCATAAATTCTCCCATTGTAGTGGCTGAATAAGGCTTCAAATAACCAATGGTTTCTCCTATAAAAGGCCACCCCATTTTTCCTGGTGGAAGATAAAACTTTGTTTTCTTTCTTTGGA(T/C)GAAAAAGAAGAACAAAGTGAGAGCAAGAATGAGAGAAAGAAAACACAAACTCAAGAATGGGTTAGACATGGAGATAGATAGCTGTTTAATTCTTTTTAGTATATTTCAAGTTTTTTTTTTCTCAAAATTGAAGAAGAAAAATTAACTTGT
Unigene0033652	39	C	-	T	NNNNNNNNNNNNNNNNNNNNNNNNNNNNNNNNNNNNNNNNNNNNNNNNNNNNNNNNNNNNNNNNNNNNNNNNNNNNNNNNNNNNNNNNNNNNNNNNNNNNNNNNNNNNNNNNAACCACCAAGTCTGCCGGGGGTTGTCAGGTGTAAGCGG(T/C)GGGCAGAGAAGTTATTTCAACCACTATGACCTGAAACCACCAAGTCTGCCGGCAGATATCATACTTATTTAGAACAAAGAATGATTTCCCAAATGCCGGATGTCAAAAAGCTGATTCCTCAGCTGCCAAGCTCTTGACATTAATTAGCAT
Unigene0036081	1050	C	-	T	AATGACTTATGCGATTTTGTACGGTTTCATGATTTTGATTCTAATGGAGCTTGTTGCAGGGTCCTGTTTGGAAATTAAATGATGATTTGGCATGGCTTTGGTGCGATTCGTTATGGATTTGTTGCACTTCCTACATGGCTCGTTTGGAGA(T/C)AAACCCTATAGGATTGGTGTTGCCGTAAGGCTCGACGACAAATTGGTCTAGGGACATCCAAGGCATAGAAAAATGTTAATGTTATGCAGCATGGAAACCAAGGCACCTCTGGTTTGCTTCAAAAGCTTGAAAAGAACACTAAGGTTGGAC
Unigene0038426	76	C	-	T	NNNNNNNNNNNNNNNNNNNNNNNNNNNNNNNNNNNNNNNNNNNNNNNNNNNNNNNNNNNNNNNNNNNNNNNNNNNTGGTGGGTGATATGACTCATAAGCATTCATCTTTAATCTATGAAACCCTTTGTGAGATTACCGAGCAAGCCCGTG(T/C)GGCAGGCTATAAACCAGACATAACAGAAGTTCTATTGGATGTTGAGGGATAGTAAATATAGGAAGAACACAAATTTTGCTTCGTGTATTTTGGTTTTACAATTATTTTGCATGTACTTATGAGAAGGCAAGTGCTCATTTTGTGGTTTTT
Unigene0039305	123	A	-	T	NNNNNNNNNNNNNNNNNNNNNNNNNNNNCTAATAGCAAATGAAAAAGCCCATTTTTTCGGTCAATTCATCCAAACAAAGGTTAAAAGGTTACTACTCAAACATGTAAATACTCAAATTCTACGTATACAAGTGGATGAGGGGAAAATCTC(A/T)TCAAGATCACTTTGTCCGGCTAAATAAATCAAAACAATTCATAAGCTATATATACATATTTACATGACATTAATGTACAACAAAATCCTTAAAAAATAGTGGGGAATCAAATAACATTGCAAATAAAGCTGCAAAATTGATGTACATAAT
Unigene0041552	271	A	-	T	TACTATTTTTACCCTTAAGATCAATGCAACAACCAGTCCAATTTTTGTTGTTTTCTATGTTATCCTCACGCAATTGAAAGGGGCTATAGCCTATAAATATTGCATATTCTCTCTGACTAAGTAATTCCATATACAACAATAAGTCTATCT(A/T)TTGGTGTAGTGTGAGAGAAAGGTAGGTTGGATAGTTGGTTAACCTCGTGGTAATTCATTCCTTCTCTAATTTCCAATCTTTTTCAGATTTAAAAAACAGCTAAGAAGTTCAGTGAGTAGTGACAAAGTGAATACTCCTCAAAGTTGGTCG
Unigene0041629	1403	C	-	T	TTTTTGAGGTTGCAAAAGGAGTCAGATACTAAGTTAATTATGCATTTTTTTATATTAGCATTTTTGTTAATTTAATTTAAGTTAATATAAGAATTTGGCTTGTCAATAATTTTTCTTTACTGTGATTGCGATAAAAATATATTTTTGTAA(T/C)AAACATTTGTTTTATTTCCTCTTCACTATATTCGAGGAGAATGATCACAACCAATAATGACAACAACTGCTTGTCTTTCAAAGTTGGAGNNNNNNNNNNNNNNNNNNNNNNNNNNNNNNNNNNNNNNNNNNNNNNNNNNNNNNNNNNNNN
Unigene0041958	866	A	-	T	GCTATAGTTTGTTATTTGCATGGTTTGTTTGTAGGAATCATATAATATATTTTTGTTAAATTATGTACACAATACAATCAGAGTATGTACATGTAATATTTGGAAGTCCACGGGTTCATACTTGGGTGCATAGCACCATATTATTATTAC(A/T)CGGTTTTGTTTATCAACCATATATTTGTGATAGAAACCAGGTTTTTTATTAAGAACAANNNNNNNNNNNNNNNNNNNNNNNNNNNNNNNNNNNNNNNNNNNNNNNNNNNNNNNNNNNNNNNNNNNNNNNNNNNNNNNNNNNNNNNNNNNN
Unigene0042362	37	C	-	T	NNNNNNNNNNNNNNNNNNNNNNNNNNNNNNNNNNNNNNNNNNNNNNNNNNNNNNNNNNNNNNNNNNNNNNNNNNNNNNNNNNNNNNNNNNNNNNNNNNNNNNNNNNNNNNNNNNATTCCATTTTATTATAATAAAAAATACTTTCTGATA(T/C)GTCACTAGTACAGTTTGTGCATATTATTGATAATCTAATACCCAATCTGCGGATAAAAGCAAGTTACAGACAAGAACGTATCAGGTATGTTAAATTTACATGCTCCATGCCAGCAGGAGTAACCATTTGTTCTACTACAACCACCATTCA
Unigene0043080	69	C	-	T	NNNNNNNNNNNNNNNNNNNNNNNNNNNNNNNNNNNNNNNNNNNNNNNNNNNNNNNNNNNNNNNNNNNNNNNNNNNNNNNNNNGTCAAAACATTAAGTTATTTTTTATAAAACAAGAACATTAAATTGTTAACCAATGTTCAAAGGTGTCT(T/C)ATTGGCTTTTCAATAAAGTAAACAATAGATACATCAAATTGTAATAGCATACAATACAATATTTCATATAGTAGTTGTTACATCATTTGGACACTTCCTTATTTGGTGAGCATACAAATTATGAATCACATTTTCATTTCATAACATGTG
Unigene0043584	14	C	-	T	NNNNNNNNNNNNNNNNNNNNNNNNNNNNNNNNNNNNNNNNNNNNNNNNNNNNNNNNNNNNNNNNNNNNNNNNNNNNNNNNNNNNNNNNNNNNNNNNNNNNNNNNNNNNNNNNNNNNNNNNNNNNNNNNNNNNNNNNNGAGCAGGAAAGAG(T/C)CCACTGTTTCCGGACACCTTCCTACTTTTGTTTCTTCTTCAACTAACTCTAGCTCTAACTCATCCACTCTCTACTCCACTTCAACTTTCTCCTAACGATTTTCCCTATGGAGCACAAGTATTTGTGGGTGGCTTGCTTTTTGTGGGCTTT
Unigene0044341	8	A	-	T	NNNNNNNNNNNNNNNNNNNNNNNNNNNNNNNNNNNNNNNNNNNNNNNNNNNNNNNNNNNNNNNNNNNNNNNNNNNNNNNNNNNNNNNNNNNNNNNNNNNNNNNNNNNNNNNNNNNNNNNNNNNNNNNNNNNNNNNNNNNNNNNCAAGTCA(A/T)TAAGTTTTATTATATTTGAAGTGTCTTTCATACATTCAAGTTCAGCCACAAAATCCATAGACTCAAACTATAAAACAAAACTAAAATCAAACCACACTTATTTCTTATTTAACCAAGACCAATCAGAGACTAAATCAAAACAAAAGACAC
Unigene0045144	45	C	-	T	NNNNNNNNNNNNNNNNNNNNNNNNNNNNNNNNNNNNNNNNNNNNNNNNNNNNNNNNNNNNNNNNNNNNNNNNNNNNNNNNNNNNNNNNNNNNNNNNNNNNNNNNNNGGAATATATAATTTGTCTTTCCATTACAAAATCAATTAGGTTTT(T/C)TAGTTCATGTGAAATACCCAAAACCTATTATAATTTGGAAGAGGGAGTAAGCCACTTCTCAGTAACTTGGACTACCAAATACACAGCACCGTAACCTTTTTACTTTCGGTGTTCATTACATTTCCTAATTGCTTACCTACAAGTGATTAA
Unigene0045188	1535	C	-	T	CTTTTGTACAGAGAAAACTACCGATTAAAAGATACAACGTTGACATTATCGGTTTTGATTTTTTACACCACTTTGTTTTTGCTAAATTTCGCGCACCGATGCTATATTTCCTTCAACTTTTACCAACCAACGTGGTTTGTATATATTTGA(T/C)GTTGGTTGTTTATTTCATGAATTTGTACTACATTGGTAAATATGTTTATTTCTTAAGCTGGCGNNNNNNNNNNNNNNNNNNNNNNNNNNNNNNNNNNNNNNNNNNNNNNNNNNNNNNNNNNNNNNNNNNNNNNNNNNNNNNNNNNNNNNN
Unigene0046110	5033	G	-	T	AATCTAGATTGATTATAGTGAATTTCACTTTAGTTTCCGCGGGTACTGATTGAGTTGCAGGGATCATGTATAGTGATTGAGGATTTGAAGGAAAATAACTCCATGATGTTGTTTATGTTAGTGATTGGGCATGATATGTTCATGGAAAGA(T/G)ATATTCTTTGATGTAAATAGCTCCCTTGATTCAAGGTCAAGCAGAACATAGTATTTCATACCAGCCTAGGAAAATATATCTGTCAGCTTTTGGATCCAGTTTGGTTCTTTGTATTTAAAGAGTGGATGCATAACATAATGATCTAAATAC
Unigene0046763	1312	C	-	T	AATAATGGAACAAAATCACAAATTGAAGGATATCACTGAACACTACGAGTTGGGTGGATTGAAATAGGACGAAATTGCGAGATCCTGTTTGTGTATCTCTGCGAACCCTAATCTGACGAAGGAACAACGATCGCATAGAATGAGAATATG(T/C)AGTGTGAATCGAAATTGCTTGTTGAACAAAACTAGNNNNNNNNNNNNNNNNNNNNNNNNNNNNNNNNNNNNNNNNNNNNNNNNNNNNNNNNNNNNNNNNNNNNNNNNNNNNNNNNNNNNNNNNNNNNNNNNNNNNNNNNNNNNNNNNNNN
Unigene0047016	319	C	-	T	CAGCCTCAGTATTATTTGGCAACAGTTATTTGATAATATTTTGTATAACTTTGCAATCAAAATGAGCCTATAATTGTGGTTGTGTATATATATATATTGATTTAATATTCTCGCATTCCCTGCTATTATGTATTGAGAGTTCTGGACTTG(T/C)GTGGCATGTTGTTATTATTGGGTCTTTATTCTATGTCTGCANNNNNNNNNNNNNNNNNNNNNNNNNNNNNNNNNNNNNNNNNNNNNNNNNNNNNNNNNNNNNNNNNNNNNNNNNNNNNNNNNNNNNNNNNNNNNNNNNNNNNNNNNNNNN
Unigene0047387	107	C	-	T	NNNNNNNNNNNNNNNNNNNNNNNNNNNNNNNNNNNNNNNNNNNNTAACACAAATTAGATATATTAATTCCATATATCAACTTCAAAAAATAAAAATATAAAAGTAGAATCCGATATCAGTGTATCTAGCAAAGTATCTAGCAAACCACTA(T/C)TTTGATTCCTAAAAAACCTCTCCATTTTTTTCCTTCAAAATTTCTCATCAGTTTCAGTACTCGTTTGCCTCATAATCTGCAACATTAACAAAACGTGCTTTTTGGTAAAAGCTCAGTTGGTACACTGAGAAAGAATATGAGTGACCCTTC
Unigene0049175	373	C	-	T	TGATGCTAAAAAAGGCCTTGAGTTTCTCCAAGGAACACATCTTTTGCCTGACAAACTTGATCCTCAAAGTGTTGCCTGTTTTCTTAGATTCACCGCTGGGTTGGATAAAAACGTCATTGGTGATTTCTTAGGAAACCATGATGAATTATG(T/C)GTTCAGGTTCTTCCTGAATTTGCTAGAACATTTGATTTTCAAGATCTGACCTTAGACACAGCCCTGCGAATATTTTTGGAGACTTTTAGGCTGCCCGGAGAATCACAGAAGATACATAGGGTGCTTGAAGCATTTTCTGAGAGATATTAT
Unigene0049359	555	C	-	T	TTTGAACTCTAATGGATCGGGCCAAACATTAGGATCTCTATGGATCTTCCATAAATTCGGCATCAATCGAGTACCCTTTTTGATATGATATCCACCTATTGTGCAATCTTCTGTGAATTCGCGAGGTGATGAAAATGGAGCTGGTGGATA(T/C)AATCTCAACGTCTCTTTTATTATAGCATGAAGATATACTAATTTATTGATATCTGACTCTTTCACACATCTTTCTTTTCCAATATATGTGTTAAGTTCTTCTTTTAATTTTTCTAAGACATGAGGATGTTTTAAAAGAAGACACATCGCC
Unigene0049359	1221	C	-	T	TTCCACATCCACATCGCCAAAACATCTCTTTCCAACCACCATTCTTAGGACCATGTTTAATGTCAATTGTGCAAACCACTTCTTCAACTCGACCGACGCATAGTCGTTAGTACTAGAGGACTTAGTGTCATCGAGCAATCCATATTGCGA(T/C)GACATTTGATTTGACCAAACATTAACAAGTTCTTTGATCGATGTTTGAACTTCAGAGACACGAATGTGACTCAGTAGTTCAATTCTTCGATTAGAGAGAATTTCTAGGGTGACAATTTTCCTTAATTGGCGCCAATATGTACCGTATGGT
Unigene0049359	1224	C	-	T	CACATCCACATCGCCAAAACATCTCTTTCCAACCACCATTCTTAGGACCATGTTTAATGTCAATTGTGCAAACCACTTCTTCAACTCGACCGACGCATAGTCGTTAGTACTAGAGGACTTAGTGTCATCGAGCAATCCATATTGCGACGA(T/C)ATTTGATTTGACCAAACATTAACAAGTTCTTTGATCGATGTTTGAACTTCAGAGACACGAATGTGACTCAGTAGTTCAATTCTTCGATTAGAGAGAATTTCTAGGGTGACAATTTTCCTTAATTGGCGCCAATATGTACCGTATGGTGCC
Unigene0050224	1047	C	-	T	CTCCTTCTGAAATCATCTTGTTCAAGAAGTCATTTGCCTTTGACACACTGCCAGCTCGCAAATAGCCTTTTATTATGGTGTTGCAGGTTACTAGGGTGGGATTAATACCTTTTTCTTTCATTTCATCCCACAACCTGAAAGCTTCAGACA(T/C)AAGACCTAAAGTGCAAAATCCATTTATCAAAATACTAAACGATATGTAGTTGGGAGATATTTCCCTGCTTATCATATCACGCCACAACTCCTTCGCTTTCTCCATTTCACCTATTTTGCAGAAGCCATCCATCAACGTATTATATGTCAC
Unigene0050450	800	G	-	T	CTTTTGATAACTCCTCAACATTCATTTCCTTAAGCAACAAAACAGCATTTTGTCTTGCTCCTAAATCTTTACCATCTAGAAACCAAACCAAGCAACCTAAAGAAGATGAAGATGAACACAGCTTTGATTTCGTTTCGCCAAAAGAGGTTA(T/G)AACAACCATCCATGTTAAAATCTCCAAAATCTCTTCCAAAACAACAACATGATTCTCAATAGAAACACTTGAAAAAGAATCAAAAACCGTTGCAAGAACAGCACAAGCTCCATTTCCAATTATAACCCTCTTATTCCTCTCACTCTCTCT
Unigene0050666	753	C	-	T	AGTTATATATTTAGATTCTGATGTTATAGTTGTTGATGATATTCAAGAACTGTGGAAAGTTTCGTTGAGTGATTCGAAGGTGATTGGTGCACCGGAGTATTGTCATGCGAATTTCACAAGGTATTTTAGCTATGAGTTTTGGTCGAGTTA(T/C)GAATTTTCCGAGGAATTTAAGGGAAGAAAGAAGAAGCCATGTTATTTCAACACAGGTGTTATGGTAATGGATTTGGTGAAATGGAGAGACGGCGAATACACGAAGAAGATTGAGAAATGGATGGAGATTCAGAAGGAGAGAAGGGTTTAT
Unigene0050666	843	C	-	T	ACCGGAGTATTGTCATGCGAATTTCACAAGGTATTTTAGCTATGAGTTTTGGTCGAGTTACGAATTTTCCGAGGAATTTAAGGGAAGAAAGAAGAAGCCATGTTATTTCAACACAGGTGTTATGGTAATGGATTTGGTGAAATGGAGAGA(T/C)GGCGAATACACGAAGAAGATTGAGAAATGGATGGAGATTCAGAAGGAGAGAAGGGTTTATAAATTGGGATCATTACCGCCTTTTTTGATGGTTTTTGGTGGTGAGGTTGAAGCTATTGATCATAGATGGNNNNNNNNNNNNNNNNNNNNN
Unigene0051111	38	C	-	T	NNNNNNNNNNNNNNNNNNNNNNNNNNNNNNNNNNNNNNNNNNNNNNNNNNNNNNNNNNNNNNNNNNNNNNNNNNNNNNNNNNNNNNNNNNNNNNNNNNNNNNNNNNNNNNNNNGTATTTGCTCTAGCTCTAAAGATTCATCTCGCATTCG(T/C)CAAAGCGGATTCAACGATGCAGTTACTGCAAATAATTTTAGGATCTGAAGCAGTTGAACAATCTGTTCCAAAATCCAGTAGGGGTCACAACAACTGGTTCAAGGGGGTCCTTAAAGTTAGCTTTCTCACCCAATTCTTCAAATGAATCCA
Unigene0051303	66	A	-	T	NNNNNNNNNNNNNNNNNNNNNNNNNNNNNNNNNNNNNNNNNNNNNNNNNNNNNNNNNNNNNNNNNNNNNNNNNNNNNNNNNNNNNGTTTTTTTTTTCAATTTGCATTTGATTTTTCTTCTTCTTCATGTATTTGAATCTTGAAAATCAAC(A/T)TTGAGTTGTGATTCCTTGTTTGTAGTTATGTGCTCCGAAACAAGTACTCCACCGCGTCTTTCTTTCTCTCATAATCTCTCTGAATTTCATCTTCAAAAAGATGTTACTTGCATAGAAACATTGTTGTTAGACTCAAATTCTGAATTTGAG
Unigene0051303	81	C	-	T	NNNNNNNNNNNNNNNNNNNNNNNNNNNNNNNNNNNNNNNNNNNNNNNNNNNNNNNNNNNNNNNNNNNNNNGTTTTTTTTTTCAATTTGCATTTGATTTTTCTTCTTCTTCATGTATTTGAATCTTGAAAATCAACATTGAGTTGTGATTC(T/C)TTGTTTGTAGTTATGTGCTCCGAAACAAGTACTCCACCGCGTCTTTCTTTCTCTCATAATCTCTCTGAATTTCATCTTCAAAAAGATGTTACTTGCATAGAAACATTGTTGTTAGACTCAAATTCTGAATTTGAGTTCAACACATGTAAC
Unigene0051402	264	C	-	T	GAAACTAAAAACAAAATGAAATTAGAAAATATTCAAGAACAAACTATATCATATGGTTAGCCCACATAGTACAAATAGCCAAAGATATGGTGAGAAAAATTCCTATCTTCTTCAACACCACATCAAAACCTTTTCCACTTTTGATACCAA(T/C)GAACCAAACTTTTTCTTTCTCATTCCAAATGATTTTCTTCATGCTATTAGCTCCATAGCAATACTTCTTTTTCACACACTCTGATTTTGGTTTCATTTCTTCAACTTGCTCCTTCAAATAAACACATAGCACCAAAAAAAGTGCAAATAT
Unigene0051878	25	C	-	T	NNNNNNNNNNNNNNNNNNNNNNNNNNNNNNNNNNNNNNNNNNNNNNNNNNNNNNNNNNNNNNNNNNNNNNNNNNNNNNNNNNNNNNNNNNNNNNNNNNNNNNNNNNNNNNNNNNNNNNNNNNNNNNAGAAGAAGCATCAGAAACCATGGA(T/C)GAGTCCTCTTCTTCATCATATTGAACCATTTTGTGTTTAGTTTGGTCAAGAGAAGGTGTATGTGATTGTGAGGAGGTATGGAAAGAGTGGTCAAGGTATAGAGTCCAACCAGACTCACAACCACTACTGCATTCTGAACCCAATGCATCC
Unigene0052006	185	C	-	T	AAATTGTCTAGTTGCAAAGGCTAAGAAGGTTCCAGAAGAAGGATGGACAATGCAAGATGGAACATCATGGCCAGGAAACAATATTCATGATCATCCAGGAATGATACAAGTTTTTCTAGGTGAAAATGGAGGATGTGACATAGATGGAAA(T/C)GAATTACCGCGTTTGGTATATGTTTCAAGAGAAAAGAAACATAATTTCAATCACCAGAAAAAAGCAGGCGCGCTAAACGCATTGGTTAGAGTATCTGCTGTGCTTTCCAATGCACCATTTGTGTTAAACTTAGATTATAATCATTATATC
Unigene0053046	599	C	-	T	GGATATGTCTCCTGCATGGAACAAATAAGTTGATTCCTTTATCTCAATCCAACTGCTTCCAGGTTCCTTGAAAACTCCGGTACGCTTCATTTCCGATCGGAGATTATGAGCATTTTCCCAATCTCCTGCTAATGCATAAGTGTTGGACAA(T/C)GTAACATATGCAGCTGCTACTTGTTGGTTGGATTTTATTACCCGATTGCTTGCTTCAAGAGCGATGTCTACTCTACCATGAAGCCTACTAGCTGAAAGAAGTGTCCCCCATAACAAAGCATCATCATCCTCACTTCCAACTTGAACTGAT
Unigene0053046	1768	C	-	T	CATAACCAGCCATAAGCAAAGACCAAGATACAACATTTCGGTGAGGCATTTCGTCGAACAGTTTTTGTGCATGGTTGATTCTGAGAAGTTTGAGATAGGAGTTAATGAGATTGTTGGTGGTAAATGTGTGATTTAACAAACCAGATTTGA(T/C)AAAGTTGGAATGAGTAGGGGTTACAATGGTTAAATCCCTCTTGGTACTGAAATGGAAAGAGAAATGGTGAAGGCGAGAAAGAGAAAAGCTAGAAGAAGAGGAGAGGGATTTTAGCAAATAGGGCTTCATGTATATTCCACCCAATTCATA
Unigene0053425	568	C	-	T	AGATAATATCTTGTAGTTTTCAGTTTCACCTGTTAGTGGTGACAGTAGAACTTTAACACTTGCAGGAACATTAGCAGTGAAGAAAGGGCCTGCAACAGTGGTTGTTATGACCGAAACAAGATCAATGCCATTCTCGTTTGCGAATTTAAA(T/C)GCCGCTTCTTCTGTGAGAAGCTTTGAAAGTGCATAAACCCATCCACTTGCTTGTGTATTCCACAGAATATCAGTTTGTATTTGGCAAGATTCATCAACAATAGATTTCAACTTTCCGTTGGTGTCTTTAGCAGTAATTGTACTTATGGAA
Unigene0053504	672	C	-	T	TCTCCATGATCACAATATCTAAGTAACTTAACTTTGACAAATCATTTTCCTCCACCATTTTGTTCACCCCAACGACATTATCTAACTCTTGTTGGAGATTTTTCATTACTCTTGGATGTCTCATGAGCTCGGATAAAGCCCACTCCACGA(T/C)GGTTGCAGAAGTTTCAAATGAACCAGCAATCATGTCTAAGACTATAGCCTTTATATTTGTTCGATCAACGACATTGTTTTGTTCATCAGATGAATCGATCGGCTGGTTCATCCGTGACAGTAGAATGTCTATAAAGTCCTTATGCTTCTG
Unigene0053632	98	C	-	T	NNNNNNNNNNNNNNNNNNNNNNNNNNNNNNNNNNNNNNNNNNNNNNNNNNNNNGTACACGATTCCAACCTAAATTCATTCGATCTAAAAACATTATCCAACATTCGGACGCAAACTAGAATACTAACTTTTCACTATTCATTTTCAATGT(T/C)ACTAACAAATTTTAGAAAACATATATTGCAAAACTTGATCTTCAATGGATATATATTTTTGTTTCTTTACGTGGATACTCCATTAGATGCATGGGATTGGACAGTCATAGTTATTGTGTATATGTATAAAGTCTCATTCATCATCTTTCC
Unigene0055709	611	C	-	T	TAGTGAGTTGAAGGAGATGGTGTTGGCTACTTTGAATGAATCAGAAGTTACCATCTCAGATGATATTGTCGAATCTATTGTGGAAAAGACAATGAAGGAGGTTGATTCAAAAGGAGACGGAAAGATTGATATGGAAGAGTGGAAAGAATA(T/C)GCGGCAAAGAATCCTTCTCTTCTTAAGATCATGACTCTGCAATATCTAAAGGATATAACTATGGCATTTCCAAGCTTTGTTTTGCACACCGAGGTGGAAGACTGACTAGCTGCAAATAATCGACGACGAGTGCACGCCAAAAGGATTGCA
Unigene0055830	920	C	-	T	AAACGTTATGGTGAGTCCAATTCTCTGGCAGCCATTTTGCTAGCCCAAAATCACAAATCTGAGGCTCAAAGTCTTCTGTGAGCAAGATATTGGCAGCTTTTATATCTCTATGGATAAATCTTTTTTGACAACCCTCATGAAGATATAGTA(T/C)ACCATTGGCTGTTCCTAATGCAATTTTGTGCCTAATACACCATGGTACTTTCTCCTTGGAACCATATAGCACTGAAGCTAGACTTCCTTTTTCAGACAACTCAAGAACTAGATACATTCCTCCATCCACTCCATAGCCAACAAGCTTAGC
Unigene0057141	538	C	-	T	CTTTTGGGATAAGTATCCTTACTCCTTGCCAAGCTTTATAATATCTGCGGTTTCATTGATAGTAGTTATTGCCTGCTTGTGGATTCCGGAAACACTTCACAAGCACAACGGTAACAATGTGTCCACAGATGATGCTGAAGCTTTAGAAAA(T/C)GGAAGCAACAATGTTGACAAAGAAAAAACAGTCCAGAAGAATGAAAGCCTCTTCATGAATTGGCCCTTAATGTCATCTATAATTGCTTACTGTGTCTTCTCACTTCATGANNNNNNNNNNNNNNNNNNNNNNNNNNNNNNNNNNNNNNNN
Unigene0057612	289	C	-	T	TCTCCCTCGCGTCCTAATTGTTTCTAGACGAACCCTACGCAAGAACAAGTTCGTTGATTTTGTTGGTGAATATCACCTTGATCTTATAGTAAGCTATGGCGCGGTACCGGTCATAGTTCCGCGTGTTTCCGGGGTTCACATGTTGTTAGA(T/C)AGCTTCGAACCGATCCATGGTGTGCTTCTATGTGAAGGAGAAGACATTGATCCATCATGGTATGCAGAAGAGACATCATCTCTTTCGCAAGAGGAACTAGAAGAGATAAAGAGACTACATGTGAGTGACACATCAATTGATAAAGAGAAA
Unigene0060336	84	C	-	T	NNNNNNNNNNNNNNNNNNNNNNNNNNNNNNNNNNNNNNNNNNNNNNNNNNNNNNNNNNNNNNNNNNNGTCGGGAGTGCCACCTTCGAAGATGCTAAGTCCATTGTTGTCTAGTCTCTCCGCTGTTCTGTGGTTTATGACTATGTCAGATA(T/C)GCATTTCACTCCTCGATCACGAAATGCTGAAACTAGTGACTTCAATTCCTCCTTGTTGCCATACTTGGATGTGTCAAGATCATATAATCTTTTAGGCAGGTAACCTTGAGGACCGTCGTCGTGAGAGTTGGAGGGAGGAGGAAGCCAAAC
Unigene0063532	145	C	-	T	NNNNNNCATCTTCAAGAACAGGTTGAAATTGCTGATGAGAAACTTCAACATGATGACTTTCAAAACCAACAAAACTATTCCCTTCATCAAGCCATCTAATTAAACCACTTTCACCACTTGTTCCACCACCAATGTCATCATTACCATAAA(T/C)AAAACTGCTATTATTACTATTAATAGAACAAGAACTGAAACTTTGTGTTGAAACATGTTGTTGTGTCTCTTTTTGAGGTTGTTTGGACATTTGAAGAGAAAGAGAAGCCATGTGACATTTATTTAACTTTGCAGTTAAAGTTGGTGAAAG
Unigene0065814	52	G	-	T	NNNNNNNNNNNNNNNNNNNNNNNNNNNNNNNNNNNNNNNNNNNNNNNNNNNNNNNNNNNNNNNNNNNNNNNNNNNNNNNNNNNNNNNNNNNNNNNNNNNAGAACTTATATCGGATACGAAAGCGGTTGGAACGGTTGGTTACATAGATCC(T/G)GAGTACTATGTATCGAATGTTTTAACAACAAAAAGTGATGTTTATGGTTTAGGTGTTGTGATGTTGGAGCTTTTGACAGGTAAAAGAGCAGTGTTTAAAACGGAAGACGGTTCGAGTCCTATCGGCGTGGTGGAGTATGCAGGAGCAAAG
Unigene0066174	80	C	-	T	NNNNNNNNNNNNNNNNNNNNNNNNNNNNNNNNNNNNNNNNNNNNNNNNNNNNNNNNNNNNNNNNNNNNNNNTTCTTCTTCTTGCATGCTATTTTCCTTTTAACACCCCCAAAAAATGTCTTCAGAATTATCACACCATAATATCCAAGGT(T/C)TAACACAAGAAGAATTCAAAGAACTCGAACCAATCATACAAAAATACCACATATTAGAACCAAGCACAAACACATGCACATCAATCATAACCTACAAAATCGAAGCACCATCAAGCATAGTTTGGCCATTCGTTAGAAGCTTTGATAATC
Unigene0066380	10	C	-	T	NNNNNNNNNNNNNNNNNNNNNNNNNNNNNNNNNNNNNNNNNNNNNNNNNNNNNNNNNNNNNNNNNNNNNNNNNNNNNNNNNNNNNNNNNNNNNNNNNNNNNNNNNNNNNNNNNNNNNNNNNNNNNNNNNNNNNNNNNNNNNTGGAATATG(T/C)GGAGAGCATGGCGGGGAGCCTTCTTCGGTTGCATTCTTTGCTAAAATTGGTCTTGACTATGTCTCGTGCTCTCCTTTTAGAATTCCAATTGCTAGACTTGCAGCAGCTCAAGTTGCAGCATAAGGAGACTGTTGGTTGTCTGCTGGACTC
Unigene0068479	208	C	-	T	ATATCCCATAACTTTCACAATATCTCTTCTAACTTTCTTCTTCTCCTCCATTTTTTGACCAAAGAATTTCTTCCCAACAGATTCAATCTTCTGCCTACTTTCAAGAGGAGCTCCATGATTTATCACATGGAAAAACCCCCACTCTTTGCA(T/C)GCACTTCCTATTTTCCTCACAAGCTCATCAAAAACTAAAGGGTCTTTCTCAATATTGCTGGAACTGTCTAGTATAGGTGATAGGTCTATTACTGGAACGTTTTCAGCTTCTATCACATTTGGCTTTGGTCTGTTATCTGGTGCTTGAATG
Unigene0076870	15	C	-	T	NNNNNNNNNNNNNNNNNNNNNNNNNNNNNNNNNNNNNNNNNNNNNNNNNNNNNNNNNNNNNNNNNNNNNNNNNNNNNNNNNNNNNNNNNNNNNNNNNNNNNNNNNNNNNNNNNNNNNNNNNNNNNNNNNNNNNNNNCAACAAAAGGGTGA(T/C)TGGAAAGATTTGTTTCTAATGAGTATTTCTTTTTCTGTTTATGTGTATATATCTCAGAAGCTAGTTTGTGCTTATTGTGCTTGGACTTCATTGCCTAAAGTAAACGTGTGGTAGTTAGTTATTCATTTCTTTACTTTTGTTGAAAGCTAT
Unigene0079723	100	C	-	T	NNNNNNNNNNNNNNNNNNNNNNNNNNNNNNNNNNNNNNNNNNNNNNNNNNNTGAAGAGCTTCACATAACATCAAGATGTATACATTCTTTGGTTTTGAAAGCTGCAGATCCAACTTTGGCTATTTTACCTCTCTCTGGTCCAAGTTCTGT(T/C)CAAAGTCCAGAGGATTCAGAAATGTGGAATGGAATATCCACAAGCCTAACATCAAAAGAATCTGGTGAAGATTGGTGGTTTGAGGATGTTTCTTCGCTTAGTTTACCTTTGTANNNNNNNNNNNNNNNNNNNNNNNNNNNNNNNNNNNNN
Unigene0081753	112	G	-	T	NNNNNNNNNNNNNNNNNNNNNNNNNNNNNNNNNNNNNNNATTTTATTCAATATTTGAAGCAGACAATACAACACAGTTACACAGTTACACATACCCTGAGACCCCAAAAAACAGTAGGAATATTAAAATACATAATAGGAAACAGAAAAG(T/G)GGTAAAAACAAATTGATACAATACACACACACATACATTGATTGATAGACAAAAGTGATGATGACTAGTAGTCTTCAGCAGCAAGAGGCTGGTGTGCATGAGGTGGTTCTGTTGGGATCACAACATATTCATATATGAGTGATGCCAATG
Unigene0081753	926	C	-	T	CACCAGCCGAGAAAGCTGAATCTTGGTATATCTTAACTAAAGCAAGGCCAGAGCCTTCTCCAGCAAAGACAAAGATGAAAGTGGAAGCAAATTCAGCTAAGGTAGCTCTAAGAGAATCTGGATGTGTAGCTTCATCAGCTCTTCCAAAAG(T/C)ATACCTACGAGTTGACATCTGTACCTCAAACAACAAACAGCAAACTAGTCTTTCTAAGATAAATGTTCTTTATGTTCTTTGAGTTTTGAAAGACACTTGATGAAGGNNNNNNNNNNNNNNNNNNNNNNNNNNNNNNNNNNNNNNNNNNNN
Unigene0083116	2068	C	-	T	ACAAGTTGACTATGGACATGAAGGACGCGGGTTACAAACCACTTTACAGCTTAAATTTAAATATGATTTTGGATTCTAATGAATGAATTGAATAATTATCACAAGTTTTATCAAAGGGAGGTGGTGGTTGGTTTATGGTAGGAATTGTTA(T/C)GAAAGTAACAACTGATAATAGTTTCGTGACCTGCATAAATTTATCCTATGTACACCACAACAGCCACTTGTTTGAAACACTTAGGCTGTTCATTCATTTTGAAACAGATTGTAATTGGTTAAAAATCAAACCATTCATGTATATTACGAC
Unigene0083116	2460	C	-	T	TTGTTTGGGGTCCAGGTACATGATAGGGTTACAACACTAGGACTAAAGTCTAAAAGCAGGATGATGAGTAAGTTTTCTTGTTTCTCTCTCACTGGATGCTCAGTAAGAATATTGTATTGTTTTGGATTTCCTTTTTACAAATGAGTACTA(T/C)GGAATATGGCAAGCTGTCAGATTTTATCAGAGGGACCTATCTTTCTATAAGGAGGAAAAAGGTTCTATGAAAGGTTGTGTTTAACTTTAACAGTTCTAATTAGTGTTTTAAATTTGGTTAATTCTACTTCTTAATTCTTCTCAGAATTCA
Unigene0084705	20	C	-	T	NNNNNNNNNNNNNNNNNNNNNNNNNNNNNNNNNNNNNNNNNNNNNNNNNNNNNNNNNNNNNNNNNNNNNNNNNNNNNNNNNNNNNNNNNNNNNNNNNNNNNNNNNNNNNNNNNNNNNNNNNNNNNNNNNNNTGGAAATGTCTGCTGTTGT(T/C)TACAAAGATTGGGTTTTCACTCAAGCAGGACTACCTACTGATCTAATCAAAAGAGGAGTGGCGGTTGAGGATCCATCTTCTCCACACGGACTTCGCCTCCTGATAGAGGACTACCCTTATGCTGTTGATGGACTAGAGATTTGGGATGCT
Unigene0084948	196	C	-	T	TTTTGACTATTTTGGGAAATAAAATTTGAACACAAGATCAAAACTTCCTAACCTCAATATTATGTTCAGAGTACAAACATTTTGCTGTATGCTTCTAAAAGTTTTCACAAACATCATTCAATTTGGCACACAAAGCCTTCATCTCACTGA(T/C)AATAGATTTGTGAGAGATTGATTTTCATAGAAAGTGTCATCATCATCGGTATGTGATAAGAGTGTCATAAGAGCAACGACTAAAGATCTCATACTTGGGCGTAGTAGTGGATTGTCTCTTGTACATGCTCTCCCAAGTTGAGCCATCTTT
Unigene0085089	579	C	-	T	CAGGTGGGTTATGGACGAAGCGAAAAAGTCAACAAAATCTGGTTCTCTTAACGAAGTGTCAATGGTGTTGCTCAACAATTTATTGTCTTTACCTTTTGCCATCATCATGATATTCCTTTTTGGCGAGTGGGATTATGTAATACACGCCGA(T/C)GTAGTTAAACTACCGGAGTTTTGGGTTGTTGCAACAGCTAGTGGACTGATCGGACTTTCTATCAGCTTTACCTCGATGTGGTTTTTACATCAAACTAGCCCTACAACATACAGTCTTGTAGGTTCCTTAAACAAGATTCCAATCTCTATT
Unigene0085362	1305	C	-	T	AGCAGAAATCAATCATCTCTTGCAAGAGATCGATAGAGTTTCATTAGATTTGGTTGAAAATAAAGATTTGGTGGCAAGTCTACAGAGCGAAAATTCCAATTTAAATGGGAACCTTCAATTGTCAGTCGATAAGATTAAAAATCTGGAAGA(T/C)GAGAATCTATCTGTTGTTCTTGAGAATCAAAGGCTCAATTCTCAGATTGTTTCCATACAAGAACAGTTATCTATAGAAAAGGGAGAACGGATGAGATTTGAAGATGACCTTAAAGAAGCCACAACGCACTTGGAACAACTTTCCAAGAAA
Unigene0085649	1854	A	-	T	GATTGTAATGGATGAGAATATGTGAAGGGAAAGAAGAGCATAATGATTGTTATGTGAGGCTAGTGAGTTAGAATCAACTGTCATGTATTTTTTTCTTATTTATTTCTCTATGGAATTAGAAAGATTTTTGACAAAATAAAACTTCCAAAC(A/T)GAGTTATGTATACACAGTTGTAAACATAAACATCACAATGCAATCGCTCAATTAATANNNNNNNNNNNNNNNNNNNNNNNNNNNNNNNNNNNNNNNNNNNNNNNNNNNNNNNNNNNNNNNNNNNNNNNNNNNNNNNNNNNNNNNNNNNNN
Unigene0086077	89	C	-	T	NNNNNNNNNNNNNNNNNNNNNNNNNNNNNNNNNNNNNNNNNNNNNNNNNNNNNNNNNNNNNNGGGGAATATTTCAAAGACACATACCACCAAAAAAAATGAGTGATATTTCATATTCACAACGTTCAACAGAAGAATAAACCATAAACCA(T/C)GGCCAGAAAAACCAAAATTAAGCATAAAGGCAAGTTATAGGCACATTATTGCCTTACAAAATATAATTACAAGGAAAATGAAATTTCGGCTGCCCCAAATCCAATGCTATATAGAATATGGTATATTCTATTGTACAATCAACAGCTTCT
Unigene0086169	262	C	-	T	TGAAAAGGACTGTGAGTATTGGGTGGAGAAATGAAGATCCTTTGAACCATAAGCAGGTTTGCCTAATTCTTCTATAAGTTGCTTGTTTCTCCTAAACAACTCAGAGTTTTTGTATGTATCATTAAAATCAACACCTAAAGTAAGTTCTTG(T/C)GCCGAACTCGTAACTTCTAACATCCATGTTGCTGGATTATAGCCATCTTTGATTTTACTAACCCCTTCAATGCTCTCAAAATACTTGATCAGTTGACTCGAATGACGACCCAACGGCCCAACGTATACTTCTTGTCCTCCGCGCTTCATC
Unigene0086169	376	C	-	T	TGTATCATTAAAATCAACACCTAAAGTAAGTTCTTGCGCCGAACTCGTAACTTCTAACATCCATGTTGCTGGATTATAGCCATCTTTGATTTTACTAACCCCTTCAATGCTCTCAAAATACTTGATCAGTTGACTCGAATGACGACCCAA(T/C)GGCCCAACGTATACTTCTTGTCCTCCGCGCTTCATCAGGAATAACTCGTCAAAAGCTTCGAATATGTCGATACTTGGTTGATGAATGGTGCAAACAACTGTTCTTCCTGTGTCAACTGTGTTTCTAACGGTTCGCATAACAATTGCAGCA
Unigene0086348	124	G	-	T	NNNNNNNNNNNNNNNNNNNNNNNNNNNGCAATTACAAGATTTTACACAAAAATGTATGTCCTCAATTGCGTTATCAACCGAGAGCAAATAGGGGTGCTAAGGCCTTAAGATGATGAGAAAAGAAACTTCCTTCAAAGATTACTATGCAAA(T/G)ATTGTAGCTCAGAGACAACCTCCTTTCGAACTTGATCTCTTCTTATTTTTCCTGTGGTAGTGACTGGAAAAGGCTTCTTCCATTCAATAAATATCTTTGGTATCTTAAACCTGCTTAAACTATTTTCCAAACAGTATTGTTGGAGATTCT
Unigene0000338	155	C	*	A	ATTCTCAAATTTACATTTCTCATTGTGTTTCTTTCTCATTGCTGACAAAATGGCGAACGCGGCGTCTGGAATGGCTGTGCATGATGATTGCAAACTGAGGTTTCAGGAGCTAAAATCAAAGAGGAGCTACCGGTTCATTGTGTTCAAAAT(A/C)GAAGAGCAGCAAGTTGTCGTCGATAAATTAGGCGAGCCGACAGACAGTTATGATGATTTTATGGCTAGTTTTCCGGCAGATGAGTGCCGATACGCTGTCTATGATTTTGATTTCACAACCGATGAGAACTGCCAGAAAAGCAAGATCTTC
Unigene0000529	58	T	*	A	NNNNNNNNNNNNNNNNNNNNNNNNNNNNNNNNNNNNNNNNNNNNNNNNNNNNNNNNNNNNNNNNNNNNNNNNNNNNNNNNNNNNNNNNNNNNNGAAATCCAACTCATCAAATCTTTGGCCCAACACTTTTTCCATTGATTGGAAAAAGAA(A/T)ACCGTTTCCAATGGTTCTAGAATCCACTCCATGAAGACATGGAATCCCATCAATAATAAGAAATTTGAAACACTTTCCTATCTACCACCACTTTCTGATGAATCCATTGCTAAAGAGATTGACTACATGCTCAAAAAAGGATGGACCCCT
Unigene0001915	439	G	*	A	TTCTTGAGAATTGTTATTTACCTTGATCATCACATCAACTTTCACTATGTGATGATCTGATGTCCCTTTGGACGAAAGGACTAAGTAGGAACCAGGAACAAACTTATACGGCGAATTCGATGATGATAATATGTAATCTACCCGAGTTCC(A/G)TACTTGCATGTCCCTTGCACACTTTGTCCTTTGGCAATCATTACAACCGATTCATATTCCCCTGCATAATCTTTAGAATCTGTGTAATCTTTACTCTTGAGATGTTTCATCACTTCAACCTTTGGTGTTGGCTTTCCCATCTCTTCATAG
Unigene0001915	523	G	*	A	GTAGGAACCAGGAACAAACTTATACGGCGAATTCGATGATGATAATATGTAATCTACCCGAGTTCCGTACTTGCATGTCCCTTGCACACTTTGTCCTTTGGCAATCATTACAACCGATTCATATTCCCCTGCATAATCTTTAGAATCTGT(A/G)TAATCTTTACTCTTGAGATGTTTCATCACTTCAACCTTTGGTGTTGGCTTTCCCATCTCTTCATAGTACTTTACAATATCTGTCCATCTTTCTTGCGAGTAATCGGATTCATCGAGTGAATTAAGTCCTCCAGCTAAGATGTGAGGCTCG
Unigene0001971	202	G	*	A	TTCCATTCCAATCCTCTCTTTGAATCGCCTTCATCTTCTTCCTCTGAACCCAATCCTAAACCCACCATTGACGAATTCACTCACAACAACACCATTAATGTTTCTTCTTCTCTCTCTAATAACAACAACAACAACACAGTGAAACGCTGT(A/G)TTTTGTGAATTTCAATTCAACAAAAAAAATGAGGTCTTCTTCTTCTACTACTGCTAATTCGGGTACGATCAATATCGCTGCGAGTGCTCAGAAGCTTGATGTTGATAATCGAATTGCTCTTCGGTTCTATTATCGAATTGCTGATAACAT
Unigene0002238	120	G	*	A	NNNNNNNNNNNNNNNNNNNNNNNNNNNNNNNGAACCAGAAGAAAGAGGGAGATTACAGAGACAACCTCGGCGTTTTCGTGGTCATAGACTCTTAATTCCTCAAAAATCAAACCTTAGTCCAAGACAAAACTCTTCTCCCTTAACCACATC(A/G)TCGTTTAAGATTCCTTCCAATAGGCATAGGAAATTTCAAACGCGTTAGATCTCTGTCGATATGCAAATAACACGATGGCGAAATTTTGTGTCCATGAAGAATCACATTATTCCATCCCTTGAGCATTTCTCAGCTTTTCATTCTACTCCA
Unigene0002299	99	C	*	A	NNNNNNNNNNNNNNNNNNNNNNNNNNNNNNNNNNNNNNNNNNNNNNNNNNNNCGCAAGTTTTGTGGTTTCTCTTCCTAGCTACCGCGTCAAAAATTTCCTCCCTATTCTCTTACAAATCTCACCAGTATCACACAGGAAACACACCAACA(A/C)CAACAACAACAAGAAGGAAGACATGGCTGCAGAGTCGTACGACGAAACCATCGCATCGCTGACCAAGCTTCTCGAGGAGAAAGCTGAGCTAAGTAGCATCGCGGCAGTTAAGATCAGGGAGCTCACGGCGGAGTTAAAGGCCACCGCTGA
Unigene0002299	1165	G	*	A	TTATCAACAAACAAAAATAAACCAAGTATTTTTTGTTTTCTATCAACATTTTTTTTTTTTTTGGAAATAAACTTTTTTTTGTTTAGGAAAAGTGTGTGGGAATATTAGAGACTTGAATAGAAACTTGATAGAGAGAACTTTATGGAAAGT(A/G)TGTGAGAATTATTTATGGAAGAGAGAANNNNNNNNNNNNNNNNNNNNNNNNNNNNNNNNNNNNNNNNNNNNNNNNNNNNNNNNNNNNNNNNNNNNNNNNNNNNNNNNNNNNNNNNNNNNNNNNNNNNNNNNNNNNNNNNNNNNNNNNNNN
Unigene0002379	552	G	*	A	CTTGTTACAATGCCCATTTCTTGCATAACCCATGATCATGGCTTTCCAAGAAACCAAATTCCTCTCTGGCATCTTGTCGAAAACTTGAAAAGCATCCGCAATGTATCCGCTTTTTGCATACATGTATATTAAAGCACTGTTCACAAATAC(A/G)TTAGACATAGCAGGGGTCTTGCTTGCATTGGAATGAATCAATTGTCCTTGCATTGGAGCTTCTAATTTCGCACAAGCTTTCAAAGCTGCCGAGTAAGTATAGGAGTTAGGTGACACACCTTCCTCCATCATTTCACGCAAAAACTCCAGA
Unigene0002470	27	T	*	A	NNNNNNNNNNNNNNNNNNNNNNNNNNNNNNNNNNNNNNNNNNNNNNNNNNNNNNNNNNNNNNNNNNNNNNNNNNNNNNNNNNNNNNNNNNNNNNNNNNNNNNNNNNNNNNNNNNNNNNNNNNNNCAATTATCATCACAAGGGTCAACTCA(A/T)CCGACCTCCAACACGATGTCCACAAAAAACACCTTCCACATCATCTTTTGTTTCTTCTCATCATTCATATTCATATTCCACACAATAGCCACAGACATCCACGACCTCCTTCCTGATTACGGTTTCCCAAAGGGCATCCTTCCCAACAAC
Unigene0002895	707	G	*	A	TAGAAAGGCAACTTCGTTGAAAGTGCTTGAACAAAGAGCAGCTGAAGAAGAAGAGATGAAACAAATGGTGGTGGGTTCTCCTACATCCCCACCTTCCTCTACGGACACAATCTCCTTTAACTACACACAACAAGACCAACACGTGTCATT(A/G)CCGATATTGTTCCAACAAGTTATTCCTAAGGAAGAATCCCAACATGAAACAGAGACAAAAACTCATGATATGGTTTCTCAGGTGGCCATGACTGAGAAACCATGTCATAATAACAAAAAAGCTTGTGGAACATCGTTGCAATTGCCCTTA
Unigene0002895	891	C	*	A	GAATCCCAACATGAAACAGAGACAAAAACTCATGATATGGTTTCTCAGGTGGCCATGACTGAGAAACCATGTCATAATAACAAAAAAGCTTGTGGAACATCGTTGCAATTGCCCTTAGGGAAGGACAATGTTCCTGAGTTACAGTTACCT(A/C)TTGTAACGGATTGGACTCAAGATACCTTTTGGACTCAACTTAACAGTCCTTGGCTACAAAACTGGACTGCTTACTCCAACATCCTCAATTTCTAGTTGCATTAATCAACAAAACAAGTTTATTTTGGAATTTATGTATATTCAGTCATTT
Unigene0002933	1969	C	*	A	AGGAGGCACGACAGGAGTAATAACTGGTGGAATAACAGGTTGAGTTGGCTGGGGCAAAGTTGGTTGAGCAGAAGATACAGGGTTTTGTTCCTGAACATCAGAGCCAGGTATAGATGATTCACCAGTAACATTCGATGTTGAATTTTCCAT(A/C)TCCACTTCCATGATTCTCACTGAAATGATGAACCTTGAAAATCACTTGGTTATCTTCTCGGTAAATCTTCGGTCTTGCTCATGAGCCTCAATACATTGGGGAATTTCTTCTCTATTCTTCTTTTTCTCTCTTCAGTTAACTGAGTCTAGT
Unigene0003020	724	G	*	A	TTCTGAGGCTGATTCACTTATGATCCCGAAAGACCATTTAGAATCCGGATTCAGGGTTGTGTCTTCAGATAGCAAGAGGGAGGCGGTTGATTTGTTAATCAAAGCATCAGGATACTTGGAGTTCTGTGTTAAGCAAATTCTTCCTCAAAT(A/G)CCATTTGAAACCAGGAAAGTTTTGCCGCATGATTTGCAAGAGGGTGTATTGGAGGCTATAGCTATTCAAGCACTAGGCCAGGGAACTGAGATTCAGCTTGGCCTTGCTGTGGAGAGTCAAAAAGCTACTTTGTCTGTGAAGAGGAGGTTG
Unigene0003505	871	G	*	A	GGCAAATTTTGAGAAACCTAAGGGCAATCCATCTGCATTTCTTAAGCCAGAAACCACTATTTTATCACCTTACTTGAAATTTGGTTGTCTCTCTTCCAGATATTTCTACCAATGCATTCAAGATGTATATAAAAGTTTGCCAAAACATAC(A/G)TCACCTCCTGTTTCTCTTCTAGGACAGTTGTTGTGGCGAGAGTTCTTTTACACAGCAGCTTTCGGGACTCCAAATTTTGATAGGATGAAAGGCAATAGGATATGCAAGCAGATTCCTTGGAAGGATGATGATAAACTTCTGGAGGCTTGG
Unigene0003670	1434	G	*	A	TACCCCTTTCATGCAGCCATCTCTAAGGTCCTACCGCCAATCCCCCTCTCTTAGTGTCAGCCGTAGCTCTGTAGATCTTAGGAATGCATCCCAAAGATCTCTAGCTTCGCACATGAATTCACCGCGTTCCAACGGTTACCCATCTATGTC(A/G)TCTCTTAACTCAAGATACTTGTCTTCACATGTTCCAAGTCCAAGCATCGGTTCAGTAAGTTTCCTTGGTTCATCCAGTCATCAGCAACATCCACTCCGTCATAGCGAGTCAGCCGCAAGCTTCTCACCATTTGTGTCCGCCAGCTCCCTC
Unigene0003721	2298	C	*	A	AGAGGATTAGTACCATTATTAGAGACAGGTATGATCAAATAACCTTCACTAATAGGATTTTTCATGACCCCATATCGCAGAATCATAAGCATAAAAAGTGTAAACGATGAGGCAATCAGAACTCCTCCATACAATTTCTTCATCTTGATG(A/C)TCCTATGAATGAAGCAATATCCCTACGACTTTATGGTACTTGATCATGAGAATGTCAAACTACAACCAAATTGATCATTGTCTTTCAGACAACTTCTTATAATAATTGTGGAGAGAGAAATGGTAGAATAGAAACAGATAAGGAACACAA
Unigene0003721	2637	G	*	A	GTAGTGAAACTTTGCTAGATAGCTATGCGAGATTCACTTATTTTTTCATGTCTGTTCTCAATCTGAAACCAAGTACCAACTACCAGCCTTTAGAAGCATGTTTGTATACTGAGACATCACCTTGAAAATCATATCAAAAGCAAATCAAAT(A/G)TAGCAAGCACGCTGAACCTTCTGAGGTTTTCTTGTGAAAATGGCGGAAAATGCAGAGAGAGAAAGTGAAGNNNNNNNNNNNNNNNNNNNNNNNNNNNNNNNNNNNNNNNNNNNNNNNNNNNNNNNNNNNNNNNNNNNNNNNNNNNNNNNN
Unigene0003814	1833	C	*	A	TTGCTGTTGCTGCTGCTGTTGTTGAAATTGTTGTTGTTGTTGAAATTGTTGTTGTTGCTGCTGCGGTTGCTGGAACAAATTGCTTTGCTGTTGAAAAGGAGATTGTTGCTGCTGTGGTTGAAAAAGAGACTGTGGTTGCGGTTGCTGAGG(A/C)GTGGAGAACAACGAAAGTGACATTGTGAAAAAGCGATATCAGAGAGTGAAGAAAACCTCAAAACCCCCTTGTTAAACCCTAGGAACAGAATGGGGAAATTGAGAAGGTTTAAGCGTTACTGAAAAATCTTCGAATCAAATTGGTGAACGA
Unigene0003817	30	G	*	A	NNNNNNNNNNNNNNNNNNNNNNNNNNNNNNNNNNNNNNNNNNNNNNNNNNNNNNNNNNNNNNNNNNNNNNNNNNNNNNNNNNNNNNNNNNNNNNNNNNNNNNNNNNNNNNNNNNNNNNNNNGGCTGCTCCGATTGCGATTTTGAGTCTCA(A/G)AGGCCAGTCGAGAGTGCACTCGCCAGCAGCAGGATGTAGTTGATCATGAAGCATTCCATTCGGCATGTTTTTATAGACCAAAAGCCTCTCTTTTTTGGCCATACAAAAACCTAAAAGAGGAACCAGATTACGATGTTTGACAATCCCAAG
Unigene0003922	715	G	*	A	TAGGTATCCAATTTTGCCTTCTTGATCTTCGGGGATAATGTCTGGAACTCCACCGGCACGTGCTCCAACGACAGGAATTCCAGAAGACAAAGCCTCCAAAACAACTTGACCAAGTGTCTCGGACTCTGATGGCATAACAAAGACATCGCC(A/G)CTAGCGTATGTTTGAGATAGTTCTTCCCCTGATAACATTCCTGTGAATACTGCAGGCATGCCTTCGAACATTTTCTCCAACTCCTCCCTGTAAGGTCCGTCTCCGATAAAAGCGATCCGTGCTTCAGGAAGTTTATCCATGACACTTTTG
Unigene0003928	1831	G	*	A	CTCGGTGTTGAGGAAGTTCACTCATGAACCTTGAAGTAGTGCTTGTGTCAACCAATGGTTTTATCTTGTGCTGTTAATGTCTATTCATTGTCATTGGATCTCAGTCCAACTACATTGTTGACCTCAAAGGTGGATCACAATCCAATTATT(A/G)CTGTAATCTTTTCTGATGTGGAGCGTGCTTAGAGTCCGTAATAGTTTCCTATTTAACAAATTGAGTTTCACTTGTGTAAATTTAATTTAACTGGGCATGAGAATTGCCACTTACATATAATTATTGACTAGTTTTATTTGATAAATAGTT
Unigene0003943	261	G	*	A	TTTACCCCAATACAAAATTCCTCCATTAGATTCCCCACAGAAATTTAATAAATGAAAACAGAAAACATCCCACACAATTTTTAACCAATTTTCTGCTCAGATTTCTCCATCAATCAAAGCATGAGTGGAGAACAAATATATTTCTAACCC(A/G)TTTTCATTTTCTGCCTAAATTTCCACTTGCAGAGCTGAAGACTCGTCAAGCATGAATTTGGGAATTACTAAGAAAAGCAACCACACACCTCGTACTTTGAAACAACTTATCCACCCTCTGCCATACCATGGACTGAATATCTAGGAGTTT
Unigene0003956	66	C	*	A	NNNNNNNNNNNNNNNNNNNNNNNNNNNNNNNNNNNNNNNNNNNNNNNNNNNNNNNNNNNNNNNNNNNNNNNNNNNNNNNNNNNNNTTTTTTGATAAAGAAGCCAATACAATTACTACAAGGTAATAGTAGCATTCAACAGGTAAGTTTGA(A/C)TGTATCTTCAATTTAGCACTTACTATTTAGTATATTTACATCACGAATTATAATTTCATTGAAATAAAATTCAAAGTGAAGCAACTTGTCCTTTATTACAAGTGAAAACTGGAAAAGCCATTTTTGTTTTGTCTGAAGCATATAAAGCTA
Unigene0003956	67	T	*	A	NNNNNNNNNNNNNNNNNNNNNNNNNNNNNNNNNNNNNNNNNNNNNNNNNNNNNNNNNNNNNNNNNNNNNNNNNNNNNNNNNNNNTTTTTTGATAAAGAAGCCAATACAATTACTACAAGGTAATAGTAGCATTCAACAGGTAAGTTTGAC(A/T)GTATCTTCAATTTAGCACTTACTATTTAGTATATTTACATCACGAATTATAATTTCATTGAAATAAAATTCAAAGTGAAGCAACTTGTCCTTTATTACAAGTGAAAACTGGAAAAGCCATTTTTGTTTTGTCTGAAGCATATAAAGCTAC
Unigene0003992	1428	C	*	A	TCATCTGCTGCATCAACTTCAGTGTCGATAGTTGATGCTATACGATCTTTGATCACTCCTACTCCCGAGGGTGACTGGTTTTCTTCTGGTGTATATACCAGTGGAAATCCTTACGGAATAGCTGAAGATATCGTGTTCAGCATGCCATGT(A/C)GATCAAAGGGAGATGGTGATTACGAGCTTGTCAAGGATGTTATATTTGATGACTACCTAAGACAGAAATTAGCCAAGACAGAAGCTGAGTTATTGGCCGAGAAAAAATGTGTGGCTCACCTAACAGGCGAGGGAATTGCTGTTTGTGATC
Unigene0003993	849	T	*	A	CATGCCCTTGTTTGAGTGTCCATCAAGGCGTTGTGTCATGAACAAGAACAAGGGTAATGTCATCCTTCAACTGAGAGCATCAAAGTTTTTGAGATTTCAAGAGGCAAAAATCCAAGAGTTAGCTGAACATGTTCCAAAGGGTCATATTCC(A/T)CGAACAATGACTGTTCATCTTAGGGGAGAACTCACTAGAAAGGTAGCTCCTGGTGATGTTGTTGAACTATCAGGGATTTTTCTTCCTATACCTTATGTTGGTTTTAGAGCAATGCGTGCTGGCCTAGTTGCTGACACATACTTAGAGGCC
Unigene0003994	857	G	*	A	AGTTTTTCAAAATGTGCTCACCTTTTTCGTTGCCTTATTTGAGGAAAAGGATTTCTTAAGGATGATTGACAAGAATTTCCTGAATATGCAAGATAATCCTGAGGTCTTCTCTGAATTGGAACGAAATATTTTACATCAAGATGATTCTTC(A/G)TTGACTAAATTGTCCAAGTTCCGTACATTATGTATACTTTGGATATTTTTTTCTCGTCCAAAAGAATTGCTTGCAGCTTGTTTGGAACTCTTTGCAGCCACCACAAAAGAGGGAACTTCTAACGAAGGAAAGCGTTTTCTGAGCATGGTA
Unigene0004028	634	T	*	A	ATGGACTATGGTTATGAAATTCATGCTACTTCCGTGGAAACCAGAATTGGTCTTTACAGGTACATCTGTCATGGGCGTTAACCCAGAAAATGGAAAGTTTTGTAGCCATGTGGACTTTTGGGATTCACTAAAGAAAAATGATTATTTTTC(A/T)GTTGAAGGTTTGTGGGATGTTTTCAGACAGTTGAGGATTTATAAGACGCCGGAATTGGAATCACCCAAATATCAAATATTGAAAAGGACAGCAAATTATGAGGTTAGACAGTATGATCCGTTCGTAGTAGTAGAAACCAATGGAGATAAA
Unigene0004028	871	T	*	A	GACAGCAAATTATGAGGTTAGACAGTATGATCCGTTCGTAGTAGTAGAAACCAATGGAGATAAACTATCTGGGAATACTGGCTTCAATGATGTTGCTGGATATATATTTGGAAAGAATTCAACCACGGAAAAGATACCAATGACTACTCC(A/T)GTCTTCACTCAAGCCGTTGATCCTGACTTGTCCAAAGTTTCAATCCAAATAGTTCTTCCATCAGACAAAGAAACAAAGAGTTTACCAAATCCTAATCAAGAAACAGTTAGTGTGAGAAAGGTAGAAGGAGGCATTGCTGCAGTAATAAAG
Unigene0004079	808	G	*	A	AATAGTGCCAGCTTGAGTCATAAGTCGGTGAAGACAATAATCAGCAACGCGTGCGTTCATATCAGGTGTGTCTAACAGGACGTTTGTAGCTTTAAGGTTCCCATGAGGAACAGCTCGGTCGAAATGGAGATAGTTCAGGCCACGTGCTAC(A/G)TCAACTGCTATTTTGAGCCTCTGAGCCCATGTTAATGGTGGACCGTTTCTTCCTGGTCGATCATAAAGAAAACTTGAAAGACTTCCTGGTGAAATGTAATCTGAAAGAATGAGCTTCTCATGCTGCGTAGGACCCCAATAATAACCTCTC
Unigene0004086	325	G	*	A	CAGACTCGACAACTTCATCATCTCTGCGTTTAAACCCAAACACTCAAATGTCCCACTTTCAATTCATCATTCATCATCCAATTTTCCTTCTTTCAAAGTTCAAAACTTTCCTTTCAGGGTTCGCTATAATTCAGCTATTAGAGCCACTTC(A/G)TCTTCCTCTTCTACTCCCACAACCATTGCAGAACCTAATGACATTAAGATTAACTCTATTCCTACTAAACCTATTGAAGGACAAAAAACTGGTACCAGTGGCCTAAGAAAAAAGGTGAAAGTGTTTAAGCAAGAAAATTACCTTGCAAAT
Unigene0004144	202	C	*	A	AAGTAACAAAATAGTTAAAAAAAGACAAATGTATTAAGTAACCGAGGGAGTAGATAAGTTAACTAGTGTGATTATGAAGATTAGTTGACAAAATTAGACTATTTATTACTAATACATTAATCCTTGTTCTGAAACTGTAACCACCTCCTG(A/C)GTGTGAGAGAGTTAGCACCGTGACACAATGGCAGCTACCTTGCAAACTCCGCTTCATGCATCTATCTCCTCCTCTCCCGCATCATCATCATCTTCCATTCACGCAACCAGATCCCTCTCCTTCCTCCGTTCCACACCGCCACAAACTCTC
Unigene0004144	792	G	*	A	AGGCTTTGGTGAACGTTGGTAGTGACATGGCAAAGCTCGTCCCTGGCCGCGTTTCAACAGAAGTGGATGCGCGTCTTGCTTATGACACACATGGCATTATCAGGAAGGTGCATGACCTGTTGAAGTTGTACAATGATAGTAATGTCCCTC(A/G)TGAACGTCTGCTATTTAAAATTCCTTCAACATGGCAGGGAATAGAGGCTGCAAGATTGCTGGAATCCGAGGGCATACAGACACATTTGACTTTCGTTTACAGCTTTGCCCAAGCTGCAGCTGCTGCTCAAGCTGGTGCATCTGTGATTCA
Unigene0004144	1376	C	*	A	AGGAGGCTATCACCTCAGTCTGCTAGCAGATACACATTTAGTGATGAAGAGCTTATTAAATGGGACCAAATGAGCCTTGCAAATGCCATGGGACCAGCAGCGGTGCAGCTTCTGACTTCTGGGCTGGACGGTTATGCCGATCAAGCAAAG(A/C)GGGTGGAAGATTTATTCGGGAAAATTTGGCCACCACCAAATGTATAACTTTACCTCTTTATGTTGCTCAATAGATGTTTACCTTGATGGAATAAACTGAACATTGAATGGAATCTTCTGATCGTTTTTTCGTTTCTCCCTTGATCTCTTG
Unigene0004230	633	T	*	A	TGATGTAAAATATACTGATTATACACCTTGCCAAGAGCAAGATCGGGCAATGACGTTCCCGAGAGAAAATATGATTTATAGGGAAAGACATTGTCCACCTCAAGAGGAGAAATTGCGTTGCCTAATTCCTGCTCCCGATGGGTATACGTC(A/T)CCTTTTCCTTGGCCTAAAAGCCGTGATTATGTCTACTATGCTAATGTACCGTATAAGAGTTTGACAGTGGAGAAGGCTGTTCAAAACTGGGTGCAATTCCAAGGAAATGTGTTCAAATTTCCAGGGGGAGGAACCATGTTCCCTCAAGGA
Unigene0004256	55	T	*	A	NNNNNNNNNNNNNNNNNNNNNNNNNNNNNNNNNNNNNNNNNNNNNNNNNNNNNNNNNNNNNNNNNNNNNNNNNNNNNNNNNNNNNNNNNNNNNNNNTTTTTTTCGCACATAATATAATTATATATATAACAATGGGGCAATGAAAATTTT(A/T)AAAATGCCCTTCATTGAGCAATAAAGGGATACACGAATTCAAAAGTTTACCCTTTAGTCTCTTGAACAAAAAGAGAAGGGAACACCACTTTATAATAACCCAATCATGTTCCAGTTCACTCCAATTTTTTGGGTGATATGAAAATACATA
Unigene0004256	219	G	*	A	TTGAGCAATAAAGGGATACACGAATTCAAAAGTTTACCCTTTAGTCTCTTGAACAAAAAGAGAAGGGAACACCACTTTATAATAACCCAATCATGTTCCAGTTCACTCCAATTTTTTGGGTGATATGAAAATACATAAAAGACATGATTT(A/G)CAATATTTTTTCCTCAAACCTCTGTAATGAAAAATACAACCCAAAACACCAGGGAATATGCAGCAAGGCTTTTGCTAGCACACATGTTGACAGCCCAGCAACTAAAAATTAATAGAAGTGACATCTGCAACCCAAAGACGATGTCGAAGC
Unigene0004400	633	G	*	A	TTGTTCTCTCCAGATTGGTTGTGGACAGAAGAAGGAGAAACATTTGACAAAGCCTGAAGTGGGTCATTTTAGGGCTCAAGGAGTTCCAATGAAGAGGAAGCTTATAGAGTTTCGAGTGACAGAGGATGCGCTTCTTCCTGTTGGTACATC(A/G)CTTAATGTTCGTCACTTTGTTCCTGGACAGTATGTTGATATTGCAGGAATCACTAAAGGAAAAGGTTTTCAGGGTGTAATGAAGCGGTATGGATTTAAGGGAGGTTCAGCATCCCATGGGAATTCTAAAGCACATAGAACCATGGGTTCT
Unigene0004414	138	T	*	A	NNNNNNNNNNNNNGTACTTTAATTTTGATTAATACGAAAATTTTAAGATGAGTTAAGGCCAATAATCCAAAAGTAGAGTCTCAAGGGAGTGATAATTGATCTGTACATATCATAGATGAAAAAGAAAACTACTAATAAAAGATATAAAAA(A/T)AAAAAAAAAAGGAAAAGATGACAAAATTTTCCGGCAGTCTAAATTTTTTTACCCTTTGCATTTTGTTTGTACAATCATAAAAGTGAATATGAATCAGAGATTCCCTCTGCCGGTTACATCTCCAACAGCCCCTCCCACCAATTTTTTTCA
Unigene0004476	1684	G	*	A	TCTCCTCTACTTTTCCAAGTCATAGCTTCAAAGTTAGAAGGAAAAAGCCATTGGTTTTGAGAACAAAACCGAAGAATCAGAGGGTACCAAAAAGGAAGCAAATTTGAAGAAGATTTGGTAGAGAAAGAATGAAAACAGAGAAGGTGTTCT(A/G)TTTTAAAGTTTTCAGTTCTGGTTTGTTTGTTTGTTTTCCTATGTGCCACGTTATTCTTGTTCTTTGCTTTGTGTTCTCTCTCTCTGTCTGTCTTTGCAGGTAAGGGAAGTTGAATACAACANNNNNNNNNNNNNNNNNNNNNNNNNNNNN
Unigene0004504	618	C	*	A	AACTACAACTTCATTCTACCAGACTTGATTGTCGGATCATGCTTGCAGACTCCTGAAGATGTTGATAAGCTGCGGAAAATCGGAGTGAAAACTATATTTTGCTTACAACAAGACCCAGATCTAGAGTATCCTAATAAACATATTTGTTTT(A/C)TATGGTTCATTTTCAGCATTTGTGATGTAGTGCACAGGTTTAATCCATCAAACACAATCATTTTGTTTCTTTAATACTGTGTAGATATTTTGGAGTTGATATCAATGCCATACGAGAATATGCCAAGACGTTCAATGACATTCAACACTT
Unigene0004525	307	G	*	A	CCAAGCCATTGGTGTTCCTGCTGGATACTTCAAACCAAAAAATGGTTGTGTCTCCCTCATGCATGATTTCGCTGGTTGATTCCAATCTCGACCCTCGTAATGCACAGGAGAAATTCCTAAAAAGAAGACCTTTGTTTGGGTTGGATTTAC(A/G)TTGATGTTAACCCATCTGGCCCAAGTTGTCAAGCCTTTGTAAAATGCAATGAATCGGTTCATGTCTTTGTACAACTTGCCACCCTCTTGAATATAATCCCATGGTTGTGCGTTGCCGGTGTGGGTCCACCAATGCCACGTGTTGAAGATC
Unigene0004541	1654	G	*	A	ATATTCAGAAAGATTCATTTCTTTATGAAAGAAACTTTGATTATTCGGCTTGCTTGTAACATGAACAACACTAGGAACTTCCGTTAAAGTACTTGAACCATGAGTTTCAAATTGTATCGTCTTGGTCACACTCACACTCAAACTCTGATT(A/G)TTGTTATTGTTCTGAGGTTGGTGCTGTTGTTGGTGGTGACTTGGATTTGAAATCGAAGTGTTTGTTGTTGTTGTTGCAGCAAGAGAATTAGTATCAACGGAATCTCTAGCTTCTGGATCGCTAAGCCAAATCGAAGATGGATCATTTTCA
Unigene0004557	1932	G	*	A	ACCAACGAAATTGAACAAACCGTTCCCTTGTTCACCTTCAGAAACAGAAATATCAACACCATTCATAGCCAAAATATCGATAAGGTCAGGGTCATTAGGAACGATAACGTTCGCTCTCCGTCCATCAACGGCGGTTAATTGAAGAACAGC(A/G)CCGTCTTTACTAAACCTAACTCTCTCAACCTTCCCCTTCTTAACGGCATTCAGAAACTCACTGTAACGCCACTGGCTACCGTCGGGGAGATCGGAGGAAGATTGCGCTTGAGGCTTTGGTGCTGTGAGTGAAATGTTTGGAGAGAACGGC
Unigene0004698	247	G	*	A	TCTGCTTCTCATTTCTCGCACGCACACCGTTCTCTGCTTCTCCTCTCATCGATTTTGGCTTTGTGCTTCAGGTTAACCATTTCTTCCCCAAATCAGAACAAAGTGTTTTATCATCTTTCTCATGAATCCGTTGCGTTGTATCACAACAGT(A/G)TTTTTGCTGGAGCATCTCTTTGCTTGTTGTATTTGTTGCTGATTTCGAAGTGTTTTAGCAAAGAACATGACATCAAAAAGGGAAAGGGCAACCGATGATAGGGTAGAGAAGGAAGGGCTTGATTTTGAATCGAAAAGGAAAAGAGTGGAT
Unigene0004699	152	G	*	A	AAAGCCCACACAACCTGGAATTTTTTTGGGAGTCGGCATCAGGCATCAATCAATCCCTCAGTCACCATACAGTCGCTCCTCGTCCCCCCGCTATTTCTGCTTCTCATTTCTCGCACGCACACCGTTCTCTGCTTCTCCTCTCACAACAGT(A/G)TTTTTGCTGGAGCATCTCTTTGCTTGTTGTATTTGTTGCTGATTTCGAAGTGTTTTAGCAAAGAACATGACATCAAAAAGGGAAAGGGCAACCGATGATAGGGTAGAGAAGGAAGGGCTTGATTTTGAATCGAAAAGGAAAAGAGTGGAT
Unigene0004798	372	C	*	A	CTACTAAGATGCGTGTTGTAAACAAATATTCATAGGGCCACAATTGAAGCGTTAATTTTATCAGGACCCCCACTATAATCAAGCTCTACAAAAGTCCCCCCACCTTCTCCTTTGGCTAATCTTCCCGGATTGACAGCAATGCATTTCCCG(A/C)TTTTGGTCTCTTCGCTTTCGTTATTAAGAACCTTGATAAAGTACTTGATGTCTGAAGGTAAGATAAGAACATCTGGAACCGATGAGAGTTGAAGGGCTTCTGGCGCCAGAGAAAAGTCCAGTGGAACACTTTCTGCCGGTGGATAAAGTG
Unigene0004798	1580	G	*	A	TCGGTTTTCTATTGCATTAATCCTATCCTCAGTTCTATCATACATGAATCTGCAACCTGGTTTCGGCCCTGATCCACGAATCACCAATGAACACCTTTTACGGGTTATGACTTTCTTAACAATACTGTACTCGTCATTCTCTGCATTCTC(A/G)CTGTTAAGTTCTTGTTTTCCATTGTCTACATCGGATATGGTGTTGATGCTGAATTTCACTGCAAACCTATCTGTTCGTTTGGAAAAAGGTGTCACCAGATCTGCTGGTTTTCCGGATGCTAAAACATTCCCGTACAAAGATGGTGTATCA
Unigene0004798	1796	G	*	A	CCTATCTGTTCGTTTGGAAAAAGGTGTCACCAGATCTGCTGGTTTTCCGGATGCTAAAACATTCCCGTACAAAGATGGTGTATCATGTATAGGCGAATAAACATCTTGATGATTATTCGTTGGTGTGCTGGGAGTATCGTCCTTTGTATC(A/G)TCATCATTATTTGAGATCATTTCTACATCTCCAATGGAATAAAGATGCAAACCAGTTTCCTTCTTTATAATATCTTCTTTCACACTATTTTGTAGATGCAACAGAAAACCCTCCATTTCAGCATTTTGTACAATCGGTTCATCTAGTTGT
Unigene0004882	2898	G	*	A	GGTGGATCCAAGTCTTGGTTCAAACTACTCAGCTGAAGAGGCCATGAGAATGCTGCAATTGGCACTCCTTTGCACCAATCCATCTCCAACTCTTAGAGCACCAATGTCATCGGTCGTGAGCATGCTTGAAGGAAACACTCCAATTCAAGC(A/G)CCGATAATCAAGCGAAGCGATAGTGCTAGTGGCGCAAGATTTAAAGCCTTTGAGCTTCTATCACATGATAGCCAAACTAATGTTTCTTCAACATCCTTACAAGATAGTAGAGAGCTAAGAGGCAAATCAATGGATGGACCATGGGTTGAT
Unigene0004911	99	T	*	A	NNNNNNNNNNNNNNNNNNNNNNNNNNNNNNNNNNNNNNNNNNNNNNNNNNNNAAAAAAATGATAAATACATCTAGTAAATTGCATAGATACTTACGATTAAGGACTATCTTTTTTCAAAAGTTTATAATTATATAGATAGAGGGAGTATT(A/T)TACAGAATATAAGTACTAGATAACAAGACAAGACTTAAATACATTTAGATAACCAAGTCCTTTAAATCAAGAGCATTTTCATGTTAAGAGTCCAAGTGGTTGCACTGTGGTTTCCGAGCAGATGTGGAGACAATGATTGGTTACTACACA
Unigene0004946	654	G	*	A	CACAGTTTGTTCTTTGCTTGGTAGCGAATTCTCTTTAGGAATATCTTCAACAATGAAATTAGAGTCAAAAAGAACATGCAGTATATGCTGCTTTAGGAAAACAGAAGAAAGAAGCTGTCTTGTCTTCGTATCCCAAAGTCGTAAATAACC(A/G)TCCAGTCCACATGAAGCTACCACAGGTAGCTCGGGGTGCCTGACAATGGATCTGATGCTTCCAGAGCATTTTCCGGTAAAACATCCTAGCATTTTTCCTGTACGTATATCAACAGAAGCCATGTCACCCGACCCATTCCCTAAATAGATT
Unigene0004970	29	T	*	A	NNNNNNNNNNNNNNNNNNNNNNNNNNNNNNNNNNNNNNNNNNNNNNNNNNNNNNNNNNNNNNNNNNNNNNNNNNNNNNNNNNNNNNNNNNNNNNNNNNNNNNNNNNNNNNNNNNNNNNNNNNGTCCCTTCTGATTCATTTCTTGTCTTCT(A/T)TTTCTTCTTCCTCGTACCTTACTCGCACATAACACGGTGAGCGGGTGAGTGAGTGGATACAATGGCAAACAAGATGGAAAAAATGGCGTCAATTGATGCACAGCTTAGGCAATTGGCACCTGCAAAAGTGAGTGAAGATGATAAACTTAT
Unigene0004982	1017	G	*	A	TGCCCATCAAGGAGAGCTAGCTATCAGGATTGATGACAACATGGATGAATCATTGGCAAATGTTGAAGGAGCCCGCAGTTCTTTATTGAGGCATCTCAACCAAATATCATCAAATAGATGGCTTATGATCAAAATATTTGCCATTTTGAT(A/G)TTCTTTCTGATGATCTTCATATTCTTTGTGGCCTAATGTACCGAACATGGAAGCTTTTTTCACTACTTATCTGGATTTGTTTTCATCCTTCTGTGGAAGCAAAGATGCCAAATCAACTAAGTGATGAGGCATACATCTGAGATATGAAAC
Unigene0005066	884	G	*	A	CCGAAGAGCTCAGAAAGCACAATCTCAAGCTTCTAATGTGGCACATGCTGACTCTCAGCATCCTTCCTTGTTTGGAGCCATGCCTATGGGCTACGTTCCCCCATATAATGGCTATGGTTATCAGGCTCCAGCAAGTTATGGGCTCATGCC(A/G)TACCGCATGCCGCCAATGCAGAATCAAGCTGGTTACCATAATATGATGCCTCACATGAATCAAGGAAATGCTTTGCGGCCTGATCTTGGCCCCAACATGAATCCTAGAAACTATCATGTGCCTCCTGCAAGTTATGTTGGTTCTTATCCT
Unigene0005124	392	G	*	A	TTTGTCTTCAGTCTGCTATTGTTTCTTAAACTCTGGTAAACTAAACTACCTAGTATCTATGAATCCCAGGCAAAATGTTACCAACTAGTTAACAGACTATTCTGATGTTTGTTTTACAAGGTAATGGAGCTAAATTCATCATATGGCGGT(A/G)TTTATCTAGTTAGTGAGGCCTATTGAAAACATCAAACAAAACCTAGTTTTCACCTTCTTAGAGCTCCATAGTTTCTGGTCACCCGAGGTTGAGACAGGTTTAATCTCTTTTGAACATTGTCATCATCATCATCATCGTCGTCGTCATTGT
Unigene0005253	1456	G	*	A	TGCATGAGGAAAAGTTTTGGGATCTTTCAGTGCATCGGTTTTCATGATTTCAAGCACTCTGGCTGCAATTCCCGAGTAAACATCAGCAGGCTGGTCTCCACCAACAAGATTGACTGCAGCAGCTCCCAACTTGTCCCTCCCAAGTGCTGC(A/G)TAGTGTTGTAAGCCATTGCATGAACCATCCTGATGTACAGGCATATGAGAAAGGGTAGACTCGGGAGTAGGGCTTCTCAATGCTTCAGAAAGATTGATACATGCTGCCAAGCACTGAAAAGGATCCTCTGCTTGCAACCACCACCGCTTT
Unigene0005281	678	G	*	A	GATAAAACCAGAAACAGTTCCAGTTTCATGATTTCTTATGTTGTTCAGCCTTTTGATAATGTTTCATCTATTGCTTTGATGTTTGGAGCTAGTGAAAAGTCTATAGTTGATGTTAATGGTCAGAAATTACATGATTATGATACTATTTTT(A/G)TTCCTGTTACTAAATTACCCGTTTTGAAACAACCTAGTACTGTTGATGTTCCTTCTCCGGCACCGAGTGGGAATTCTAATGGTGGTGGTGGTGATGATAAGAGTGGAATTGTTAGAGGGTTGGCTATTGGGTTAGGGATTTTAGGGTTTT
Unigene0005315	2058	G	*	A	ACCAAAGTGCCTATTCTCTTCCCCTGCTTTAATGAGATCTAGCACTTGTTCAGCATTATTGACAATTTCCTCTCTGAGTCCTGCAACAAATACTCCCCGCTCCAAACTCTCATGAATTTGCAATTTCTGGTTTTCAACAACAAGAAGGTC(A/G)TTAATCTCTTCATTATAAATCTCCATATAGGAAACACGAATTAAAAACTCCCGTTTAGACATCGTCTCTATTGTTGCAAATATATCTTTAACTGCCCGAGGAATCACTCCCGGGTCAGTTTCACAACCATTCATTGTGAAAGTCTTCCCA
Unigene0005576	781	C	*	A	TCACTTTCTGTTGCAAAGGAGATATCAAAAGTTGCAAGAGATTATGGGGCAGAGCCTGTTGGAGTATTTGTGGATGATGATGCAGAAACAATACTAAGAGCTTCCGATGTATCAAATCTTGAGTTTGTGCAGCTTCATGGATCTGGTTCG(A/C)GGGCAGCTTTCTCATCTTTAATTCAGGAAAATCGTGTAATTTATGTTCTCCATGCAAATGGGGATGGGAGTCTTTTAAACACAATTCCTGATGAAGAGGGTTCTCTTGTTGATTGGGTTCTGGTTGATAGTGCAAAGGGTGGCAGCGGCG
Unigene0005600	51	G	*	A	NNNNNNNNNNNNNNNNNNNNNNNNNNNNNNNNNNNNNNNNNNNNNNNNNNNNNNNNNNNNNNNNNNNNNNNNNNNNNNNNNNNNNNNNNNNNNNNNNNNNTAACAACATATATTAAGAAAATATCATTAGACAATGGAGAGTCCAAAACA(A/G)AATAATGTTAGCTTTTTTCAGATGCCTCTTCACTATCCAAGATACACAGAAAAAGACTACCAAGACATGCCTGAATGGAAGCTTGATAGTCTCCTTAAGGAATATGGTTTGCCTACAAATGGTGATTTGGCTTACAAAAGAAACTTTGCT
Unigene0005737	769	G	*	A	GGTATCACCTTCATCATCTCCTTTGTCTTCTTCGCCCGATGTGCTTGATTCTCCGATCCGACGGCTTAAAATGACCGACACTGAATGACTATTTGGACTGTCATATAGGATATTATTATTACTTTTTTTATTGACCTTTGAACATTTTTT(A/G)TTTACTTTTTCTTTTTTTAATGTTTAAACTGCAATTACATACCTGTTTTTTGTAAACGGTTTTTGTTGCACTGCACTGTTCTTAATTATTTTATCTTCGGGTTAATTTATTGTGTTTCTTAGTATGCAAGTGGGTTAAAGTTAATAAAGT
Unigene0005862	3663	G	*	A	TCACAGCTTTTTTGTGAGTGCATCAGATGACTCTACAGTCAAGATTTGGGATTCCAAAAGGTTAGAAAAAGACATTTCATTCAGGTCAAAGCTAACTTATCACCTAGAGGGAAGCCGTGCGTTATGTGTAGCAATGCTTCCAGGATCAGC(A/G)CAAGTGATAGCTGGAGCATCTGATGGATTTATTCATATGTTTTCTGTTGATCATATATCTAGAGGTCTAGGAAATGTTGTTGAGAAGTACTCTGGTATTGCTGATATCACAAAGAAGGATACGAAAGAAGGTGCCATACTTGGCCTTTTA
Unigene0005872	1149	G	*	A	TGGGCTAGGCATAATCCAACTAAGCCAACTCCTGCGCCAATCTCAAAGCAGGATTTATTAGAAAATAATTCCGGATGGGAAAGTATTAACTCGGAGAGAAACAGACTTGATGGCCATATTGAGCATCCAGTATCTCCTTCAAGCATGTTT(A/G)TAGAACACTTCAATGGAAAAGTCAACACCCTTGAGTGCGGACAAGTTTGTAGTTCAGAATAATCATCAGGAAAAAGAAAAGAAATTCTTTTGCAGATTCTTGAATCTCTTTTGCCAAAACTATCATCCTTAAATGATGTAATGTAGTGAG
Unigene0005899	129	T	*	A	NNNNNNNNNNNNNNNNNNNNNNATAAACTTCAAGCTAGGTTGTTTGTTGGTGGGTGAGAGGTGTCCCTCATCCACCGTGTCATGTCTTTCTGTTGAATGTAAATCGAAACCGCTTCTCTGTCTCTTTCTCTATCCTCGTCAAATCTCCCC(A/T)CAATCCTATCCAATCTAATCCTTAACGTCACAATCACCCTCCTCTTCCGCCCTCCTTTCCGCTATACACCTTCCCCTATTCTATGATTTTCTCTTTTTTTGTCATATAATTTCTTATACCCCACAACACCATCGATAACCCTTTGCTTTT
Unigene0006038	550	G	*	A	AACACTGAACATCTCTCTCTCTGCTTCTGGTATGTAATATCAAACAAGGCAGTCCTTCCCTGTCTAGTTCTAATTCAACTTAAGAGAGTTTCCAATGTCTATCACAAACCGATATTGCACGTCCTTATTTATGACTCTTTCAAGAGCTTC(A/G)TTCGAGTACCCAATTGGAATCAGTTCTATATCTGGGTGAACCCCGTTTGCAGCACAGAAGTCAATCATCTCCTGTATCTCTTTAGTACCACCTGTAATACTTCCGGAAACAGTTTTTGATCCTAAATTAAGGCTTGCAGGGCTGAATTTG
Unigene0006038	1492	G	*	A	CGGCACAACAGGATACTTTGAATCCCTGTGTTTATTCCTTGTCCAAATTACATCAGCATAACAAACGCCACAGTGTGTAATTTTGACATAAACGTCTTCACTCCCAAGAGCCCTGCGATTGAATTTGTAAGGCGACAAAACTCCAGATGC(A/G)TCTCTTGCCGCCCAAGCAAGGCAATCTTCCCCGACACCCTCGGAACTCATACCTTTGAAAGGGATTCACGGAGAAGAAGATAGACGAAACAAGTGGGAGGAGTTGGTGTCAACTATATAATAATTCAACCTCACTTGCCGGTCAAAATCA
Unigene0006040	1060	G	*	A	GTGGCGGATGAGTGGGTTGAGCTTCCGGAGATGTCGTCGGAGCGTGATGAGTGTAAGGCGGTGTTCCTCCGTGGGAGGTTTGCGGTCGTCGGTGGTTACAAAACGGAGAATCAAGGGAGATTTGAAAGAAGCGCGGAAGCGTTCGATTTT(A/G)TGACGTGGAAGTGGGGTCAAGTTGAGGAAGAGTTTTTGGATTGTGCCACGTGTCCTATGACTTTGGTCGACGGTGGAGATGGTGGTGAGAGTGTTTATATGTGTTGTGGCGGGGAGTTAGTTGCGATGAGGAGTCACACGTGGCAGAAGA
Unigene0006143	89	G	*	A	NNNNNNNNNNNNNNNNNNNNNNNNNNNNNNNNNNNNNNNNNNNNNNNNNNNNNNNNNNNNNNGGTAAGTGGTAACAACTTTTAATTAAGAGGTGTATCATTAATCAAATTTATATTACAGGTTTCTTTTCTCTGAATTGCTCTTACAACT(A/G)TAATTTCATTAAGCAAGACTAGGACAAGGCTTGATTAAATTATGGAATTTATTTATAAAAAATGAGATAAAAAGGATTTACAGACAGCAGTACAGAAATTTATACTCTACGCAGATGTTAGCCCTTCAGGAAGGGATTCATTGTTGGGAT
Unigene0006209	960	T	*	A	GATCTTTACAAGATTTCTGTTGCAATATCTGAAAACGGCTACTCAAACCAGAAACGCCGATTACAGAAGCAACAGCGAGTATGCTGCTCTTGCAGAAACAGCGGCTTATGGAGTCATATTTGTAGGTAAGAAAAACTTCTCTTGCAGAGG(A/T)CTTTTTTGGGTATTAAGGATTGTTTCAAGATTCGGGTTGAGCAAAATTTGCAGAACCGAGCTAGAGAAATTGATTGGTGGAATGCTCGAACAAGCAACGCTGGATGATCTTTTGGTCTCAGGGCAAGATATGGGGATCTATTATGATGTT
Unigene0006284	203	C	*	A	TATTAAATGACATACTGTAGCACTATCTTCGGATCTCACACACTAGCTGGTAAATTAGTCAACAATTACTCTTGGAATTTCATGTCAACCTTACATTGTTTGACAATTTTTTCAGTGATTAACCTCATTCCATGTGAGATTTGGAACTTG(A/C)TTGTAATGTAATATAGATAAACATAGTGTAATATAATTACATTCATTATTGCTTATATCTTGAATCATTACATTCATTATTGCTTACTATTTTTTGCTCGAGAGAAGAGATCTAAATGAAATGTAGTTTCAATTCTGTGAGGGTGAGAGT
Unigene0006350	912	G	*	A	CCCCGAAGCTTGTTCAAATCCTTCACCTTCATTGTCTTCACCACAACCAAAACCAATGTTTTGAACAGAAACTTTGTTTTTTTTGTTGGTTTCATCACCAAAAGTGAATGTTTCACTGCCTAAAATACCTTGTGTCATTGAGTTATCACC(A/G)TATGAATAAACATAATTGCAACCGTTTTTGTTACAAGATGAGGAAGGTAAAGCGTTACATAGGTTGCTACTACATGAGAGTTTTGAAAAAGTTGAGGATTTTTTTGGATCAAAGATTGGTGTTGGTTGTTTGTAACATTGTGAGCATGGC
Unigene0006350	1167	G	*	A	TGGATCAAAGATTGGTGTTGGTTGTTTGTAACATTGTGAGCATGGCTTACATTGAGTCCAAATGAGATCACTTCCTGTGTCTAGAACTGCTGGATAAGAAACCGGTGGTGTTCCAATGGATAGTTCCATTAGATATTCGCCATTTCCCGC(A/G)CGAATCGGTGCTTCGAACTGAGAAGAATCATGACTTGTTGATGATGATGATAACACCATTGCGTTAAGTCTTTGGAGTCGGCTATGTCCGCGGTTGATGCCATGTTGAACTCGCTCGAATTTCGTCAAGTTTTTGCCCGAATCAACATGG
Unigene0006438	99	G	*	A	NNNNNNNNNNNNNNNNNNNNNNNNNNNNNNNNNNNNNNNNNNNNNNNNNNNNTTACCAATAAAAATATCATGTGCATATCCTTATATTCATACCTCAGAAATATTCTCACAAGTATTTATGTCAATAGATAAATTCATATAAATTATTCC(A/G)AACAATCTTAAATTCCAAATCTTACTCAACTGACCAAATCCTCAATAAGGTAAATTCATGTGAATTATTAAAATGATCACAAAAATAAGCTTATTCAAAAGTGGAAATGCAGATGCACATATGGAACTTGTCTCTTACTCACCATCCCAA
Unigene0006594	80	G	*	A	NNNNNNNNNNNNNNNNNNNNNNNNNNNNNNNNNNNNNNNNNNNNNNNNNNNNNNNNNNNNNNNNNNNNNNNGCCAGCTCTACTAAAGAGCTGGATAGCAACTGTTGAGTTGAGAAGAGGTAGAAAGCGTGGAAGCAGAACAACCATACCC(A/G)ATACCACCACAGGGTTGCATTCTATTGTTTCTCCACTACTTCGATAAAACCAACCCTAACTTTATGCAAATTTCATTCTCCATCTTTTCAGAAATGTCACACATTGCTTTAACTGCATCACCCACCGTAGTCGCTTTTCACCGTGGAGCG
Unigene0006631	613	G	*	A	AGCATTGCACGTCTTTAATTCTACAGATGCCCCGCAAAGCATTGAAGCTGCCTCTTCCCACCCCCTGTTATGCCCCATGCACATGACAGTTAATATCTCATCCCTTGAGTATTTACAAATAACCTTTTGAAGGTGATCTGCAGTTTGCCC(A/G)TCCATAGCCGCAATCGAATAGAAACTAGAAACAAAATGAACCTCAGCTTCCAGTAGTTCCTGCACTTGCTCCTGCATTATCTTAAGTGTCTCCTTAGTACGCACCGCATCACTAGACAGTATAAGCTCAGGAATCCAACCCAACTGTTGG
Unigene0006644	2060	G	*	A	TTACAGGCTTTCTTAACACCAATTCTGAGATGGACCGACAAACAGCTTGGAGATTACCATCAGCATTTTAGTGAGGGTTCAGCAATTATGGAAAAGATTGTAGCAGTTGCGATGATTACCAGGAGGCTTCTACTTGAAGAACCGGACACT(A/G)CCATGCAGTCCTTGCCAATTAGTGACCGAGATCAGATAGAGATTTATATAACATCATCAATTAAGCATGCATTTACAAGGACAAATCAAGTTGTTGAAAGAGTAGATATGTCACATGAGCATCCCTTGGCATTGCTTGCAGAAGAACTCA
Unigene0006711	223	G	*	A	ATAAAGCATGTTCTGTCCAAGATCACTGCTCCTCCCCAAAAGCTCCTTTACCCTCTCTTTCTTCTCCCATCGCTTCACCTGTAACTACAAGCATTAGAAGATTGTTGAAATGGCGCGATCTTCGTTGGATGAGATATCAGACTCGGGAGC(A/G)TTCACGAGATCTGCTTCCACATTCCGACAATTCGTTTCGAGGGATCTTAATTCCCAATTTCCAGCTGAGTCAGGAAGGTATCATCTCTACATATCATATGCTTGTCCTTGGGCTTGCAGATGCCTAGCTTATTTGCAGATCAAAGGACTC
Unigene0006797	905	T	*	A	TCAACTCGAGGTTACTCAATCCAAACAAGTGATTGATGCAGAGGACGGTGATTCAGACTCGGTAGTACTAACAGCAAACTTCATATTTGTTGCTCGAGACTCAAAAACTGGGAAGGCTGCACCTGTGAATCGGCTTTCACCAGAAACTGC(A/T)CGCGAGAAACTTCTTTTTGAACAAGCCGAAGCAAGAAACAGTTTGAAAAAAAGGAAAAGAGGAGGAGAAAAGAAAGATCTTGAGAACGGGGAAGAAAAAAAACTTAAAGATCTATTGGCTGAGGGAAGAATTTTCTGTGACATGCCAGCT
Unigene0006957	1045	T	*	A	GCCACCCCCACTCTGATTTCTACCAGGTCCATTTCGCGCTTTTCTCATGCTCTTTCTGATCTCAGCTTTGCTAGGATAAGCTCCTTCATGTGCCTTGTTACCTTTACCATTTTCTTCCAAAGTCTCAGTTTTAAAACTTTCGGTAACAAG(A/T)GGTGAGATTCTTTCTACTTGCAAATTTGAAGGCACTTGATTTTTCACATCATTGGTGGCATTATTATGGCATGCATCAATAAAAGTATCATTATCATTTCTTCGAGAAACAGATTTAAGGGCATCTAACTTAAATGCTTTTATGCAACTC
Unigene0006964	515	G	*	A	AGAGGCTTTAACCCATGTCTCTAAATGCTTGTCCCATGTGTATTGTCTCATGAAATCAATTATCCCCAATACCAGTTCCTTTTTCTCATCATCCACCCCAACCAGCAATGAGTAATCCATAACAGCAACTGACGCCAAAAAGGATGTGTC(A/G)TTCCATACAGCTCTCTCCAGTTTTCGCTTAGCCTTACTTCCGAGAAATATGGGATTTGTTCTCAATGTTTCTAACAAATTCATGTCTAGCATCACTTTGTTAGTCCCAGTTGTGTCTGCGTTGTACCTGGATCTTTCTGACCCTTTAAGA
Unigene0007039	224	G	*	A	CACTACCATAGAAGTTTGATGATTTTCTCAAACGCCCATAAAAGCTCTACACTGTGAATCCCAGTGTGCCTTTATTTGCTTAATCCTTTCTACCCTCTCAGATTGTAGCCTTTGTTCCCAGTATTCCTGGCAGCTTCGGCCTAACAGAAT(A/G)TTTAGTTCTTCCAAATGCACAGCACCTTCATAAGCCGCACGCTCGCGGCATAGAGGACATTTTTCTTTAGGATTCGCGGCCTTAAGTCCATCGACAATCGACACCGATGCAGCCGAGCAAGCACAGATGTAACAGAATATATGACCACAA
Unigene0007069	141	T	*	A	NNNNNNNNNNTATATCACAGGTTTTTCTTGGTCCATATAGGAAGTAGATTCTTCCAAGCAACACTAAAGTCTAAACCAAACTATATCTGTGTGAATCTGAACCTAATACAAAAAATACTGACATATACAACAATCTTGTGTACCTATAGA(A/T)TCTCATGCTTCTTCTCTCATTAAATTAAAGAATACAGTTTCTAGGGTATGGAAACTCTTTCATATGGTTCTGCACCATGTTTGCAAGTTGTGAACACAAAGACAAAATCAGTGAAAAATAGCTTGAATTCATCATCTCAATCAACGGTTT
Unigene0007070	34	G	*	A	NNNNNNNNNNNNNNNNNNNNNNNNNNNNNNNNNNNNNNNNNNNNNNNNNNNNNNNNNNNNNNNNNNNNNNNNNNNNNNNNNNNNNNNNNNNNNNNNNNNNNNNNNNNNNNNNNNNNNGTGAAGGGTTGCAGAGAAGTAAATGGAGAATAT(A/G)TCAAAGCCAGCAGTTTCCCCCAATCCAATGATTTTGAAGAGTGAGGGGTTACTCAAGTATATACTAGAAACCAGCGTTTATCCACGAGAAGCAGAGATTCTCAAAGAGCTAAGGAATGCAACCACAAATCATCCTCTTGGCTTCATGGGC
Unigene0007381	41	G	*	A	NNNNNNNNNNNNNNNNNNNNNNNNNNNNNNNNNNNNNNNNNNNNNNNNNNNNNNNNNNNNNNNNNNNNNNNNNNNNNNNNNNNNNNNNNNNNNNNNNNNNNNNNNNNNNNAAACCTGCTGCAGTTGTTTTACAACCTCCTGAGTACCATC(A/G)GGACTTCCGTCGTCCACAACAATAACTTCAAAATCAACATCTGAAAGGTGTTTGAATATAAGGTAAAGAATGAGACTGATGTTGAGTCGTTCATTATACGTAGGAACGATTATACTGTATTTGTTTTTCTGATTCCGATGCTGCTCATCC
Unigene0007387	664	G	*	A	TCTCCGGTATGCAAATACTGATGTTTTCAAGACGATCAGATCGCTTCCTAATGATTATGTGCAAAGATACCTATCTCTGAGGAATGCAGCAGTCGTTCTTAAGTAGTTCTATCATTTACCCTGTCTTCTGAGACACCTTATTCTCTTCTC(A/G)TTCCTTAATGTTTTGTTTTAACTAATGCTGTATTGAATCTTCTTCCATGTTAAATAGATTTAGAGGGTGTTTAGAAGAGCCTACCTTATGGATGATTAGCAGAATGTCTGTAAATTACTTATATGGAGTTAAATTACGAATATCAGTTGC
Unigene0007408	1224	C	*	A	AAAAGTACACTTGCTATGATGTTTTTCTGATTTGCTTATTATTGGCTTAGAGTTTGAGTTTGTTTGATCTGCAACATTTGTAAATTTTTTTAGTAAGACTTATCAGGCGGAAAACAAAATGCCTATTGACATAACTGTCTACTGTGTTAT(A/C)TAGTTCATCAACCCATGGAAGAGGCCTCAACAGATTTTGGTCTCGTGTTGAAGGCTACCACGGTCCGTTGCTAGTTTTGGTTGCTGCAAGTTCGGGAAATGATGAGGGAAATTCTGCAATCAAGAAATTTGTTATAGGCGCCCAAACAAA
Unigene0007408	1952	G	*	A	ACATTTTCAAATTGGGAGGATTCACCCGAGAAAATGATGATGGATATGGTGTCCGATCCAAATGCTGCTCGAAGGGAAGATCGTTGAGCGAATATATACTGTTGATTTTCCTAAGGCAATACTTTAACAGGCATAAACACGGTTTATCTT(A/G)TGATTGTTCTTTATTTTCCATGCTTGAGATCCTCAAGTAGCTGTTATAGAAATTTTGTATGTAAGAAAAACCTGTTGCGTGGCAATAAACTTCTTCTGAAGGACGATTTGTGATATATGTATGTATATATAGTAATGGTAAAATATTGTT
Unigene0007933	997	C	*	A	ACCCCTCCAAGAGTTTATCGTCAAGTTGCTTCATTGATGGGTCTTTCATTGGTTACATCATATATAACTATTGCTAATATGCTTGGAGTACAAAGAGAGACTACTCGAAGACAACTGGATGCTGAAAAGAAGAAATTAACTGAGGGGCCT(A/C)GGATGGAGTCACTAAATAAAAGGTTTTCTGAAATGCATGAGAAAATAACACTGTTGGAGGAGATGATGCGCAAGATATTTACTGGGTTATTTGTGCATCGCTACAGAGACATTGACCCCAATATTAGAATGTCATGCATTGAATCACTCG
Unigene0008001	479	C	*	A	CGCAAACCTAATCCCTAAATCCCAATCCGAATCAAATCCCAAACCCTTGATCCTCACCCTATCCGTTTACCAAGACGGAATTCTCCGTCTCAAGATCGATGAAGATTCTTCCCTTAACCCTCCCAAGAAACGCTTCCAAGTCCCTGATGT(A/C)GTCGTTTCACAATTCTCCAACACTAAACTCTGGCTTCAACGCCTCACTTCCGAAGATATTAACGGTATTTCCTCCGCTGTTTACCTTTCAGACGGTTACTCCGCTGTTCTCCGTCACGATCCATTTGAACTCTTCATCCGTGATGATAAC
Unigene0008001	2202	G	*	A	TTTAGGGCCCATGCCCATCACGATACAAAAAGACGAGAACCATGGTTGTTTGGAGAACGGAATACAGGATTAATTAGGGATGCTATACATGTTCGTTATGCACTTCTACCATATTTCTACACATTATTCAGGGAGGCTAATACTACTGGC(A/G)TTCCCGTGGCTCGTCCAATATGGATGGAATTCCCATCTGATGAAGCTACTTTTAGCAACGATGAAGCTTTCATGGTTGGGAACAGTATTTTAGTGCAAGGGATCTATACCGAGCGTGCTAAGCATGCATCAGTCTATTTGCCTGGAAAAC
Unigene0008024	250	G	*	A	ATTATTACATTTATATGCATAAATAATATGAAGTTTTCTTTTGTCAAAAAATTTGTTCTATATGTAGAAGTAAGAAGATTGATCAGTTGCATTAGTTGTGTCTTTGCAAAGAATAGATCTGGCTTCAATCACTGAGCGAGGAGGCTCAAT(A/G)TCTTTCTCTTGCAATGCATTTCCTCTTAACCTTTGCATCTGGGAAGCAAATGTGTCATCCAATATTCCAAGAGCGTAGCAAGATCCGTTGTACCATATCCTATTTTCTTTCCTCCCTTCTAGAAACTTCAAAATAATCTGTCCCATTCTA
Unigene0008024	1597	G	*	A	TTTCATTTTCAGGTATGCGGTTGAGATAGTAATGGTGTCCAATTGGTAACTTTCAGAAGCACCCGACATAAATTCATCGGTCTCCATCATGTGTTTTCTACACCTTTTTCTTGCTGCAGTCTGCAAATATTTCTGTAGAATAGTTTGAGC(A/G)TCTGGAGATAGTATATCATGAAGACTACTGAAGACCTGTAAAGCAGGATGTAGAGCTGGTGCTGCAAAATCAGATGCTGGACCAAAATGATCAGTTAGACCCGTTGGCAGGTTTTCATCGAGAGATTTGTAATTCTCAAAAACAGTCGCT
Unigene0008214	1909	G	*	A	AAGGAATGCTGTCACAAAAAATGTTATTCTCCGGGAAGATCAACTGCCTCAAAGGGTACTTCATCCTAAAACAAGAAAGAAAGCCAACAAGGATGATGAGTTCTTTGGGCCAGACGATGTTTTCAGCCACCACAATTCTAAGGGATCTCC(A/G)TTCCTGCCTCCAGTCAGAAAAGCACTAGCAGTTTACAGTGGGAAGAGAAATCCAAATGACAATCACTACTCTTCAAAGCGGAAGTAGTGGATGTCGAAAACTTTGGTTGGCTGGCTGGCTTTACTGTGCCCTCAATTTTGTTTTTTTATT
Unigene0008371	1253	G	*	A	TTTACTATCCAAAGTACGGTCAACAGCTGCCTCAGGTTTTCCTTCTTGACAAACAAGATCATTCAACGGAAGGCGATTAGGCTCCTTAAATGACTCCGGGAATTCATTTTCTGCGCATTCACATACAGTACAGTCCCGCAACCGGCACAT(A/G)CCATCATCAGGCCAAAAAGGGCAGTCACACCATAGCTTGGCCTTAAAATACCGAAAGAACGGGGTTTTCACAAGCTCTTGGAGAGATGGGTGCAACACTTCCTTGTTAAGACGGTCTACAGTTTCATAATCACAACAACAATCCTCCACA
Unigene0008708	1316	G	*	A	TAAAGATTATGCTGAAGCACATGCCAAACTCAGCAACCTTGGAGCCAAATTTGATCCTCCAGAGGGAATTGTGATAGATGGTTCTCCAAATGTTAAGGGAGAGAAGTTTGTAGCAGCCAAGTACTCCTCTGGAAAGGAGTAAAAACAAGT(A/G)TCTTGTTTTCTTGTCCAAGTATCTTTTAATAAATACAAGAAGAAGCTTTTTTCAAACCGTGTGATTATCACATGTAATTTTGGAAGTCTTAAAATGAAGAAGAAAGGAATAAAATTCAATAGTGTGTCTATTTGAATTGCAGAGAGAGCT
Unigene0008756	25	G	*	A	NNNNNNNNNNNNNNNNNNNNNNNNNNNNNNNNNNNNNNNNNNNNNNNNNNNNNNNNNNNNNNNNNNNNNNNNNNNNNNNNNNNNNNNNNNNNNNNNNNNNNNNNNNNNNNNNNNNNNNNNNNNNNNATTGCTGAAAATCTCTTCCACTTC(A/G)TAGAATTCGTCAGGTGAACCGCTTTCTGTCTCATTTTCATCTTCTTCACTCACATTGACTCAGATTTAAAATCCTTGGGGAACTGATCCTTTGTATCCCACAGTATATCGACTTCATCACGGCTCAGCACCAAAATATTTGACCGTATAA
Unigene0008827	1426	G	*	A	AAAGATGGCTGGTCTTTGTCCCTTGACTGCCATGGATGTTACCAGGTTGCTTAAAGCTTTAGGAGCTCAAAAAGACGCAAGAATTTATTGGGCCGGGGGACAACCCTTGGGCGGAAAAGAAGCATTGCATCCATTAATCCACGAGTTTCC(A/G)CATCTTTACAATAAGGAGGATCTTGCATTGCGAGGTGAACTAGAACCATTTGCAAAGAAAGCTTCTATAATGGCTGCCATAGATTACATAGTTTCTGAGAAGAGCGACGTTTTCATGCCGTCTCATGGAGGAAACATGGGTCATGCAATT
Unigene0008903	399	G	*	A	GGGATCTTCCAACTAAAAGGTAAATCCGCATTACAAAAAGCTGATATTTAATGGAAGTTCTCCACAGTATAAATATGAGCAAAGGTAGCAAATGGAGATCCTAACAGTAATTATTAAGATAAAAAGAACATAATCATATCATCAGAAGTC(A/G)TCGTCATCATCTTCCTCTTCAATATGCTTTGCCAGTTCTTGCTCTTGTTGTTGCCTCTCTCTGCGCTTCTCAGCTATTTCCTTTTCCTTATGTGTGTTTTTTGGAAAACGCAGTGCTTGAACAGCCTCATTGTGCATGTTAAGACAGAAG
Unigene0008903	402	G	*	A	ATCTTCCAACTAAAAGGTAAATCCGCATTACAAAAAGCTGATATTTAATGGAAGTTCTCCACAGTATAAATATGAGCAAAGGTAGCAAATGGAGATCCTAACAGTAATTATTAAGATAAAAAGAACATAATCATATCATCAGAAGTCGTC(A/G)TCATCATCTTCCTCTTCAATATGCTTTGCCAGTTCTTGCTCTTGTTGTTGCCTCTCTCTGCGCTTCTCAGCTATTTCCTTTTCCTTATGTGTGTTTTTTGGAAAACGCAGTGCTTGAACAGCCTCATTGTGCATGTTAAGACAGAAGGCA
Unigene0008998	403	T	*	A	TTCCGATGCTGCTTATACTAACAATCAAGACCTTTCTCGTAGGCTCTCTGCTCGCAAAAGGTTTGTCCCATGGGGTTCCACTACTCCCATTCCTATTCCTATTCCTAACCCTACACCCTCCCCTTTATTGGAGTTCAATTTGAATGTCCC(A/T)CTCCCCGATGAGGAACCCAAACCCTCACCTTTACCCCCTGGAATTGATCCTCTTGTACTCTGGCAACCTCCTCACGAGGATCCTCCTCATTCCAATTTCACACCGATATCAGTTGATACGTTGCTCGTTCGTTTCCTTCGTCCGCATCAG
Unigene0008998	475	T	*	A	GGGTTCCACTACTCCCATTCCTATTCCTATTCCTAACCCTACACCCTCCCCTTTATTGGAGTTCAATTTGAATGTCCCTCTCCCCGATGAGGAACCCAAACCCTCACCTTTACCCCCTGGAATTGATCCTCTTGTACTCTGGCAACCTCC(A/T)CACGAGGATCCTCCTCATTCCAATTTCACACCGATATCAGTTGATACGTTGCTCGTTCGTTTCCTTCGTCCGCATCAGAGAGAAGGGGTTCAGTTTATGTTTGACTGTGTCGCAGGACTGTGTGACACACCTGATATCAATGGATGCATT
Unigene0009068	823	C	*	A	GAAAAAAATTCTGCTCTTGGGGACATTCCCTTCTGTCAGATACTCAAAATCATAAACAGCATAACGGCACTCATCAGCAGGAAGGGATGCAGTGAAATCTTCATAGCCTTGGACTGGTTCACCAAGCTTCTCCACAATGACTTGCTTCTG(A/C)TTCTCCTCAATCTTATAAACGATGAACCTATACGTCCTTTTTGCCTTGAGCTCCATAAACCTTAACTTGCAGTCATCATGGACTGCCATACCTGATGCTGCATTTGCCATGAGTTAGTTGTTGTTGTTGAAGATTTGATTGGAGCGATGG
Unigene0009114	2213	C	*	A	AGACGATGCTCACCTTGAACTGCACCATGTTGAATCAGCGTTTGTGGAAACAATATTACCAAAGGTGAAATCCCCTCCTCAAGAGATATTACTAAAGCTGAAGAAGGAGCCAGAGTTGAAGGAATTGTCACAAGAAAGCTCCAAGACTGT(A/C)TTTAAGCTTGGTTTATCTAAGATTCAATGTTCTCTGTTGATGAATGGACTTTTTATTGATCCCACCGAGGAAGCTCTACTAAATGCCTTGAATGATGAGACTCAGAGATTACAGGAACAAGTATATTTTGGACAAATAAAATCTCACACT
Unigene0009172	10	T	*	A	NNNNNNNNNNNNNNNNNNNNNNNNNNNNNNNNNNNNNNNNNNNNNNNNNNNNNNNNNNNNNNNNNNNNNNNNNNNNNNNNNNNNNNNNNNNNNNNNNNNNNNNNNNNNNNNNNNNNNNNNNNNNNNNNNNNNNNNNNNNNNTATTTGGCA(A/T)CACTATTAATTAAAATTTCAAACTTATTTGACAACTTGCTAGTATCAATTACAATCCCTTGAGCAACATAATAAATAATTTTGTTTTGATAGACACACCCACAATAAAGCTATGCAGTCTTTCTAAAATAAATTCGAATTTAATCAACTG
Unigene0009172	52	G	*	A	NNNNNNNNNNNNNNNNNNNNNNNNNNNNNNNNNNNNNNNNNNNNNNNNNNNNNNNNNNNNNNNNNNNNNNNNNNNNNNNNNNNNNNNNNNNNNNNNNNNTATTTGGCATCACTATTAATTAAAATTTCAAACTTATTTGACAACTTGCTA(A/G)TATCAATTACAATCCCTTGAGCAACATAATAAATAATTTTGTTTTGATAGACACACCCACAATAAAGCTATGCAGTCTTTCTAAAATAAATTCGAATTTAATCAACTGTTGGCGTGTTACTTGAAAATGTACTTGACAATACCAGGGATA
Unigene0009172	1069	G	*	A	GATTGCTTTCGTAAACACATATGTGTTAGGCCAGCCATACAGTTTTGCTCTTGTCATGCCTAAGTCTCTCATGGCCCCTTTAATTTCACGTTCAGTGGCTCCTTTGTCTCTTAACTCACCTAACTTTTCTGTTATTAATTTCTTTTCTGC(A/G)TCCACGTCTAATCCAGCAACACCATTTAGTGAATCACCAAAAACATAGGGACTTTCTAGAATCAACCCAATTCCTTCACCACACACATAAGCTGTTGATACATGAATAAGCACTTTAACTTTGATACATTCTTTGGCGAAGTTAAGTACA
Unigene0009311	1822	G	*	A	AAGCGGCATGAGTCCAATAAATTGCCACGGGCTTCCAGGACTCTCTTTCCTTCCCTCCGGAACTTCTTGGTATGCTACAGCAAGAGACCGTAAGCCACGCTCTGCAAACTTATCTATTACTGCATGAACTCTTCGTTCAATGTCTGTCTT(A/G)TTGTGTGCCAGATTTAGGATCTGTTCTGGTGCACCTTTGCTTACTCTATGCATTTTACCCTCTTGATCAGTATAAGTCAATGCTGTCCGCTTATCGGTAGGATTGAACGGAAGAAAATGTACTTCTTGTATACCAGCACGTGCCTCCTTT
Unigene0009468	991	G	*	A	AGTTGTCAGAATAAAACAGATCCCTTTTGCACGGTCTTCGTTGAATCATGATGATGTATTCATCTTAGACACTAAGGAGAAGATTTATCAATTCAATGGTGCAAATTCCAATATTCAGGAAAGAGCAAAGGCTTTGGAAGTTATTCAGCT(A/G)TTGAAGGAAAAGTATCATGAAGGGACATCCAGTGTTGCAATTGTTGATGATGGAAAGTTGGATACCGAGTCAGACTCAGGTGAATTTTGGGTCCTCTTTGGTGGTTTTGCTCCCATTGGGAAGAAGGTCATCAGCGAAGATGATATTGTT
Unigene0009474	1298	G	*	A	GCGTATTAAAGTCTTTCTCAACCCTTCTCCACCCCAGCGGTATTCAATGTGAGAGTGGAAATACAAGTCACCCACAAATAGGCGATCTTCAGAATTGAGGGATGGATAGTAGAGATCACTGCCACTGTTGCAAATATAAGCATCAAAATC(A/G)TTGGGACTCAAGCCACCTGAGATCAGAAATGACTGTATCTCAGATATAGTCAATGAGGTTGACAATATGAACCCTATAGAGCCTTCAGCCCTCTCCTCTCCAGCAGCCTCAAAGATTACTTTAATCATTTCAAGAAGACCTGAAGTGGTA
Unigene0009589	506	G	*	A	TTCCACAATCTTATCAATTGCCTCACGGTTGCTCCTTATCTGTGCCAAGGCAATTTCATATGCTTCATCTGATAATCTCTTGACAGCAGTATCAATGTCTTCTGCAAGCTTTTCTGACATTGAGTTCCTTGCCATCATTCTCATGATAAC(A/G)TCGCCACTTTGCGCTGATGAGTCCATAAGTGACCAAGGACCAATATCTGACATTCCAAATGTGACTACCATCTGTCTTGCTATACCGGTGATTTGCTGCAAATCACCACCTGCGCCTGTTGTAACCTCGGGCTCACCGAAAATAACTTCT
Unigene0009692	92	T	*	A	NNNNNNNNNNNNNNNNNNNNNNNNNNNNNNNNNNNNNNNNNNNNNNNNNNNNNNNNNNNGAAATTGGGTATGGAAGCCGTCACGAACCTAAGATTCTGAACTGTTCTCGTAAAAGTAAAACCCTTCCAAAACCCATTCTTTCTTCCTCCA(A/T)ACCCAATTTCTCCATTTCCTCACATTTTCTCTGATCGATCACCATGTCGCAATCATTGAATCTCATCAAACAACACGCCTCCAATCCCAAGCTCTGGTTGATAGTAGGACTAGGACTTGCCGGCGGGATCGTAGTTCTGTCGGAGACACG
Unigene0009756	1014	T	*	A	TTCTGAAGCTGGTAGCACAAGAGGACCCATTGTTGTGATATTTGATTTTAGAGCTTCACCGGCAATTGCCATGAGATCCTTTTGAAGAGAAATTCCGACTTTGCCCTCGTTGTCTTCTTCTTCAAAAACACATTTGAATGCTTTATCATC(A/T)GCTCCTTTATGTGTTCTAACAACATGCACTAATCTGTATTTAGCTCTCCATTTCTCCGACGAGCGGTTCGATATCAGAATCGCCGCGCCGCCCATTCTGAACAAACAGTTTGGCAGAAGCATGGCTCTTTCCTTCCCTTGGTAATAGTTC
Unigene0009823	3260	G	*	A	GTGGCGCTTGTGAACACGTGATCCACCCTTCCTTACATCCCTGCTGACCTTGGTTCCCATACCTTGATGTAACACTCTTCGAGGAGACCTTGGCCGCGTCTTCCCTTCCTCCATAGAGAATCTGCGGACATCTGCACGATTTCGAAGATC(A/G)TAACGCCTTCTTCCATCCTGCTCCTCTTCACCGTCTTCATCATCGCCATCCTCGTCACCTTCATCCTCGCCTTCATCTTCACCCTCAGCATCTCCCTCCCTCTCATGACCATCTTCTGCATCATTTTCCTCAACATCATCTCCATTTTCT
Unigene0009935	523	G	*	A	TGTGGTTTGGCCTGGTGCTATAACAATGGTGTCGGTTTTGAAAGGTTTTACATAGGTTGCATCAACCTCAACAACTGTTAGTTGATGGTTTGCAATTTTGAAGAAAAGTTCTTCATTGAGTGCAGCATTGATGATTCTTAGTAAGTAGGT(A/G)TTTTTAGGTTGTACTTCCAATGAGAATCCTTCTTGTGAAGCACAGCCTTGAACAGGACCTGGATGGCCATTGATTGTGTGAGCATCAGAGATATTTGGAGCCAATCCAGATTTCAAAGCTTCATTTATTATAGCCTCAGTATCTGATTTC
Unigene0009980	37	G	*	A	NNNNNNNNNNNNNNNNNNNNNNNNNNNNNNNNNNNNNNNNNNNNNNNNNNNNNNNNNNNNNNNNNNNNNNNNNNNNNNNNNNNNNNNNNNNNNNNNNNNNNNNNNNNNNNNNNNTTTTTTAGAAAGAAACTGCAAATTTTATTTCATGAT(A/G)GTGGTGATATACCATACAACACAAAGCGCAGATATCAGCATCAGTAAACTATAAAGAAGTTACAGAGACAAGTTCATAAAAAATGAAGCCTTAAAAAAACAAGGGCCTGGTAAAAAAAACAACCTTTTCCCAAAGGAATAAGATTGTCAT
Unigene0010006	1341	G	*	A	TCCTTTTAATAGAGGATGATCAAAAGCGGGTTGAATATGAGAGATAACGCATTCTATGATATCACCATCAGGGCTCTGAATTGTTTTAATGGAAGGTTTATTGATCTGTTGAAGACGATTACTTATGATGTTCAATTTATGCAACTCTTC(A/G)TTTGGTTTAAAAGTGTTATTAACAACAGGGTTGTTGTCAATTTTTGAGGAAGAAAATACAGGACAAAGTAAAGAAAAAACAACAAGAAAATGTACAAGGTTGTAAATGATTGGAGAAGTCAAACAAAAGCTAAAATCCATGTTTGAGAAT
Unigene0010008	3856	G	*	A	CTTTAAACTTTTTTTGGTCTGAGAGAATCTCCCTTCCCATAGATAGCAGGCTCTTCGTCCACTATAAAATCTGACATATCATCTTCAGAATCATCAGTCACATCTTCGAAAAGATCATTAAGAGATCCTTCATCATCAGAAGATTGTTCC(A/G)TCGGCTCGGTAACTTTGCCAGTCTTTTTAAGCCTCTTCAGCTTCCCATCATTCATTTTTTTCTTGTTCTCACGGATCAATTCAAGATCATCGTCATCAAGAACAATGTTTTTTGACGATCTCTTTCTCTTTTTCTTCTTTTGTGTTTGCT
Unigene0010015	25	G	*	A	NNNNNNNNNNNNNNNNNNNNNNNNNNNNNNNNNNNNNNNNNNNNNNNNNNNNNNNNNNNNNNNNNNNNNNNNNNNNNNNNNNNNNNNNNNNNNNNNNNNNNNNNNNNNNNNNNNNNNNNNNNNNNNAAATCCAATGAGACGACAAGTTCC(A/G)ACCCCTTCAAGGCCGTCTAGATCACTCGGAAATAGTCTAACACGAGTTGTAAGACGGGGAGCAGAAAACCCCGGGGTTGATGCAAACGGGAATTCGTTTGATTTCACGACAAAGCTGTTGCACTTAGCATGGCATCCATCTGAAAACTCA
Unigene0010855	745	G	*	A	CTTTTCTCCCTTGTCCGTCTTCACTTTTTCTATAGCCTGGACAACATCCATTCCTTTCACAACTCTACCAAATACAGTGTGTTTGTTGTCCAGCCATGGAGTGGCCACCGTGGTGATAAAAAACTGAGAACCGTTGGTATTTGGGCCCGC(A/G)TTTGCCATTGACAATGTGAAAGGCCTATCATGCCTTAAACTTTTGTGAAATTCATCTTCAAATTCTCTACCCCAAATGGACTGTCCACCAGTGCCGTCTCCTAAAGGATCTCCTGTTTGTATCATGAAGCCTTTGATGACCCTGTGAAAA
Unigene0010909	206	T	*	A	GTCAAATTGGAGTCGCAGAGACTTTGTCATCAGTCGGAAACACCGAGAAAGCTCCCCAGGGTTTTTTTCAATGGAGGATACCCAAGAAATTGATGAGGTACAGGAAGAAGTGATTTCTGACAAAACATCTGAAAAGGAGGAAGAGACTCG(A/T)GATGAGGTTCTTGCACGCCACAGGAAAGAGATATCACAACTGCAGAAAAAAGAAGTTGAAATGAAAAAGCAAGCAGCTAGAGGTAGCAAGGCTGAGCAAAAAACTAAGAAAAAGCAAGTGGAGGAAGAGGTTTCTCAACTTTCTACTAAG
Unigene0011155	513	G	*	A	GGTAAGAAAATCAGTGAAGCCACCAACAACAGAAATTAACCATAGGTATGCAGCTACTTTCAGAAACAACCTTGAGTCCTTGCCAAGGGCAATATCATGAGAAACTGAAAACAGATTATTAACTCTGGTTTGGATAAAAGCTGCCATTTC(A/G)TTTGTCATTTCATCTGACAGATGCAACTGTGGTAGAGGTGGAGCAGGTCTATTGAGAATTGCTGCTGATTTAGCCCAAAGAAAAAGAATAACAACAAGAAGGAGAAGAACATTAGAAACAAGAGACAAAAGGGTATAACCAGATCTCTCA
Unigene0011156	513	G	*	A	GGTAAGAAAATCAGTGAAGCCACCAACAACAGAAATTAACCATAGGTATGCAGCTACTTTCAGAAACAACCTTGAGTCCTTGCCAAGGGCAATATCATGAGAAACTGAAAACAGATTATTAACTCTGGTTTGGATAAAAGCTGCCATTTC(A/G)TTTGTCATTTCATCTGACAGATGCAACTGTGGTAGAGGTGGAGCAGGTCTGTAAGATAAACAATAGTTTATCATGCTTTTGTAAATTTTACTGATAAATGTAAAGCGTTAAGTCACGTTCAAGATGTTTAGTTATGTCGAGTCATGAAGC
Unigene0011185	746	G	*	A	GAATTTATCATGCTTGAATCTTGGTGGTGAAATATCGCCAGCAATCGGTGATTTAAGAAACTTGCAATCCATAGATCTTCAAGGGAATAAACTAACTGGTCAAATCCCCGATGAAATTGGGAACTGCGGTGAACTTGTTCATCTGGATTT(A/G)TCTGATAATCAGCTCTATGGTGATATACCTTTCTCCGTTTCGAAGCTGAAGCTACTTGAATTTTTGAATTTGAAGAATAATCAGTTGACTGGTCCTATTCCTTCGACTTTATCGCAAATTCCAAATCTCAAGACTATTGATCTTGCTAGA
Unigene0011185	929	C	*	A	CTCCGTTTCGAAGCTGAAGCTACTTGAATTTTTGAATTTGAAGAATAATCAGTTGACTGGTCCTATTCCTTCGACTTTATCGCAAATTCCAAATCTCAAGACTATTGATCTTGCTAGAAATAAGTTCATTGGAGAGATACCGAGGCTACT(A/C)TATTGGAATGAAGTATTGCAATACCTTGGGTTGCGAGGGAACATGTTGACTGGAATTTTGTCTCCCGACATTTGTCAATTAACTGGTTTATGGTATTTTGATGTCAGAGGCAATAATTTGACTGGTACTATACCAGAGAGCATTGGCAAC
Unigene0011254	67	G	*	A	NNNNNNNNNNNNNNNNNNNNNNNNNNNNNNNNNNNNNNNNNNNNNNNNNNNNNNNNNNNNNNNNNNNNNNNNNNNNNNNNNNNNATTTTAATCAGATTTATTACTTTTTAAGTTTTACAATAAACATGTTTGAGTACATGAACATGACAG(A/G)CAAACAGTACTACAGGGTAGGATTACAATCACTTCATTCCCAACAAAATTAAATTTATGAACTGATGATCAAAAAGATTTGACCTTCAGGTAAACCTACAAGAAGTCAAAGAATTACAGATTTAAGGTCTGAATTTTTCCGTTTAAACTA
Unigene0011266	1641	T	*	A	GGAAGCCCAGTTGCGGTATCCACTTCCAGCCATGTCAGCCCACAGCATTTAACACCTTCTGCAAGCTTTCCTGGTTTTTCTTCAAATGGGGGGAGCTTGATTGCACACTATGCCAAAGAGTCAAGCAAGCATCTTGCTACCGGGATTGTG(A/T)CCCTTGGAGATATGGGATATAAGAAACTTTCCAGATACTGTTCTGAAAACAATGGTTCACTACAATCGGCGAATTCTGGATCAAAGGTCAATGGAAGCATTAATGGCCATTCGGCAGATTTAGATAACATTGGAATGGTCATTGTTAAAG
Unigene0011284	361	C	*	A	CGTCACTAATCACTTTCCCTCCCTCTATACAATACTCGTGGCAGATAGATGATAAATCTGCTTGCTTTCAGCCAATAAATGGTGTAGATGATGGCAGTTTACACAAGAGTAGCTAGCTAAAAATCACTTCCACAACGTCATGCTAATCGT(A/C)TAAAACAAAAGTTATAGTTGATAGCGTTACAAAATGGGAATTGAGATGCTCTCGTTGTTAACATGCTGTATTTCATTCTTTTCAGCCTTGATAGCAGCCACTCTAGCTGCATTGGCTGCTCTATTAGCTGCTGATACTGCTCTATTCACT
Unigene0011284	415	G	*	A	AATCTGCTTGCTTTCAGCCAATAAATGGTGTAGATGATGGCAGTTTACACAAGAGTAGCTAGCTAAAAATCACTTCCACAACGTCATGCTAATCGTCTAAAACAAAAGTTATAGTTGATAGCGTTACAAAATGGGAATTGAGATGCTCTC(A/G)TTGTTAACATGCTGTATTTCATTCTTTTCAGCCTTGATAGCAGCCACTCTAGCTGCATTGGCTGCTCTATTAGCTGCTGATACTGCTCTATTCACTCTTTCATCTACCTTGGCTACATCATAGGCTTTTTCAACTGCTCTTCTAGCTTCC
Unigene0011287	66	G	*	A	NNNNNNNNNNNNNNNNNNNNNNNNNNNNNNNNNNNNNNNNNNNNNNNNNNNNNNNNNNNNNNNNNNNNNNNNNNNNNNNNNNNNNATAAAATGCAACCTTCAAAGAATAACAAAGAGGGAAATAGAATGTTTCTTATTAACGATACCCTC(A/G)TTCTTTCCATTACATTCATTAGCTTATACTTTATACTCCTCAATATACTCACTCATACATAAGTGGGAAAATAACAGCATTTGACAAAATTACAACCCAGTGATTGGGTGATAACACAGCAACTGAAATAAGGAGCTCCTATAAAGAATC
Unigene0011390	91	C	*	A	NNNNNNNNNNNNNNNNNNNNNNNNNNNNNNNNNNNNNNNNNNNNNNNNNNNNNNNNNNNNGACAGCTAGACCTTCACAACACATGTGGTTCCTATTTTCTTGTCCTTCAAATCCTGTTTTCATATCTTCACTGCATACTCACATTAAATC(A/C)CATGGAAAAAGATTCAACAACCCTCTTCATCAACACCCTTCTTTTCTTCTTATGCTTCTCATTCTCACATTCTTCAACATCATTTCCTAAACAAGCACTTCCCACAAAATCAGGTTACCTTCCAGTCACCTCAACCTCCAATTCCTCCAT
Unigene0011512	822	G	*	A	CCTATTTCAACATCTCAAGAGGTTTACTACCGAGCAACAATCAATGTCGGTGGATGTAATTCGCAAGGCATTCCAAGCAACAGAAGAGGGGTTTATGTCACTAGTTTCGCAACTGTGGCCTATTTCACCGCAAATTGCAGCCGTTGGATC(A/G)TGTTGTCTTGTTGGTGTTATTTGCAACGGAACCCTTTATATAGCAAATCTCGGCGATTCCAGGGCTGTTTTGGGAAGAACGGTTAAAGCGACTGGTGAAGTTTTAGCCATGCAATTATCAACAGAACACAATGCATCCATAGAGTCTATA
Unigene0011585	983	G	*	A	AGTGTTCTTAATGGGCTAGAATCATTTCGTGACTAATTGGACCTTTTAACGATGAATGACCTCCACAGCAAGCCGTACCAGACGTAGTAACCCCTCCACATCTTGAAAGCTAAAATCAAGAGCCTTCTTGATAGAAGAAATACCATCGGC(A/G)TTCTTACCCACACCCATGCTTGCATCAGCAGCTGCAAAAGCATTCCGTGATTTCCTTGAGGCTTCCATGGCAAAATTCACATCCTGAGCATAACCAAGTATCCTCACAAAATTGGGACGACTTCGTGCAGCAATAACATGGTTTCCAGCA
Unigene0011585	2534	G	*	A	AGCACTACCATTGGTATAATGGCTGGTTGTTTGCGCTTTAGGCTTAGTATCTGATATGTGATTAACACCCTTGCCCTGAAAATCAGACCTGTGGGCCATGGAGAAAGATTTTTCCTTCCTAGCTGTTTCCGAACGATCACTTGCACCATC(A/G)TCTTCCCCGTCTAAGCATCTTTTCGGACTATCCACAGCAGCAATATCACGAGGCACATCTTTCCCCATAACTTCTCTGTTTGAAAACTTATCTGTACTTAAAATTCTTAAAGGCGAGGAGGAAACTGATTCCACAGGGGAGCCCTTCATT
Unigene0011712	658	G	*	A	AATTACTTCATGGTTGTGAAATCCACACACTACATTCACTTTCCATCCATCGCCGTTTCTAACAGGTCTTCCTCTTAGTCTGAATGGACATCCACATTTCTTCGTTCCAGTCTTGCGAGCTAATGCATCTTTATATTGTCTATATTTTCC(A/G)CTTCTTTCACAACCCAAAATCACAGTTGTTTTCCTTCCTATCTTCTTCTTCCCTGTACCACCATTGTCTGACCTCTGAATAATGACAGTAAATCCGTTCTCTCTCCCAATGGCTCGTGCCCAATTCAGTAGATATTCTCGGGTAGGAAAC
Unigene0011845	326	G	*	A	ATTCTCAACTTCCATACCAGAAAGACAGGTCTCTTGCTTCAGCTGATCATAAGAATATCAAAGGAGTTCTTACTCATGGTGGACGCTATGTTCACTACAATATCTATGGAAACCTCTTTCAAGTCTCGAGCAAGTATGTCCCTCCTATCC(A/G)TCCCGTTGGAAGAGGAGCTTCTGGTATAGTCTGTTCTGCTGTAAATGTGGAGACATGCGAAAAAGTTGCTATTAAGAAGGTTGGCAATGCATTTGACAACAGAATCAATGCCAAAAGGATCTTACGAGAAATTAAACTTCTCCAGCACAT
Unigene0011845	2657	T	*	A	GATCAGGTAAGGGCGCGTGTACTTCAACTTTTTTCGATGAAACTGTTGCCACCAAAATGCGCCTTGACCATCTATCGTGCCATTTTCGCCTGTGACAATAACATCTGTGAGGTTAGTTCCGAATATGAGGCTTGTGAATCTTCCTGCTGG(A/T)GCATCTCTTCCTCTACCGTATGATGGTAATGGTTCAATCACAGGCCACTCAGTTATATCCTGAGAAGCAAGAAGAACAGCATCTTTATCCAAATAGAGAGTAAAGTGACTAGTAAGACTAAAACTACCAGTGAGCCATTTTCCGGCAGGA
Unigene0012232	1083	G	*	A	TGGAGCAAAGCTAATTTTGAAGAAGTGGTTAGAGGAACTTCAAATGGAGCCATGGTCTAGAACCAAGAAATCTAATGATCAACCTGCTTTTAATTGGGCTTTAATGAAGAATGCTAAAGAGGCTGATTTGTACCTGCTTCCACAAGAAGC(A/G)TTCCCTACAGGCGGATTATATTTCAAGAACAAAACATGGGTTAAGGAAACTAAAGGAAAACATGTTATAATTCATAACAATTATATAGTTGGTTTTGAGAAGAAGATAAAGCGATTTCGCGACTATGGTTTCTGGTTGGTGGATGACCAT
Unigene0012336	1745	C	*	A	CTCATTTCAACACCTTCTATAAAGCTTCACAATAAACAAAACTTCTGCTCAACCATAAACAAATCTAAACTTAAGCTTTGATGAAGATATCTGAGTGGAAGGTTGATGATTATGTGAAAAGTATGAAGAGTATTGGTTTGGCTTTTGATT(A/C)TAGCAAAAGGGTATAAAAGAATTTTGAGACAAGAACCACCAATGAAAGACACAACAACCAGACAAATATTTTTGTTGCCTAATTATGCATTTTCAGCAAAGAATTATGGGAAAAAAGCTTCAGCGGTTACACATCAATGCTTATCACTTT
Unigene0012595	495	G	*	A	CGACGCGATAGCCTCCACTTCTCCCAACCATCCTCCTAACTCATCCGCGGTAGCAATCAACGACACCTCTCCAAGATCCACAAATCTCCCCTCGGTTTCAGGTTCAGCCTCCTGCTCCGATTCAGAGTCTTTGTTCGATGCAGCGGCGTT(A/G)CTTGTATTACGGTAGCTTCTAGGTGGAGGCACGGCGTGGTTGTGATCGGAAGTGTATGTTACAAGAAGCACCGTGGGGTCCACATGGTTCCTTTCCACTTGTTTTCTTGCCGGACAATTCTTTGAACTGCTACACCTATAGTATCCTCTT
Unigene0012600	55	G	*	A	NNNNNNNNNNNNNNNNNNNNNNNNNNNNNNNNNNNNNNNNNNNNNNNNNNNNNNNNNNNNNNNNNNNNNNNNNNNNNNNNNNNNNNNNNNNNNNNNCGATGATGGGATCAAGAAGTATATGCTTCCTCTCTTGAGCTCGGTCTCCGGCGA(A/G)AGGATGAGAATCCGGCGGACAACACCTTCGGAGCTTGGTTTGCTTAGAACATGATTTGGATTGGCTTTGAGGACTTCACCGGCTGAAATTGGACGTGAAAACTCTTCTACATAACCATTTAAATGAACTATACGAATCAAGTCTAGTGCT
Unigene0012648	944	G	*	A	AGAGTCACATCCCCGGAAACAATTAGTGCTGAATCCAATTCATATCAAAGCATCAAACTATCCACATATGATTGGGAACTCAGTCCCCCATTTTCCGCTGTCTCTGGAGTTTGTCAAGAACCGGAGTCAAAATATTCAGTTTATGACCAC(A/G)TGCTTCCGGAACTAGTTATTGATCATGATGACGAAGAGGAGGAGGATGAAGTTATGAGCTCCTATGTTATAGAGATTAACTCTAGTTTTAGAGAGGAAAATTGTGGAACTGAAGCCATTGATGATGCGATTGCATGGGCGAAAGAGAAGT
Unigene0012659	90	C	*	A	NNNNNNNNNNNNNNNNNNNNNNNNNNNNNNNNNNNNNNNNNNNNNNNNNNNNNNNNNNNNNGTTATTATTACATGTATAACAAGTGATCACGTAGCACTTATTAATGAGTAGAACAAAACCCACTAAACATGCTACTAATTATTTCAAAT(A/C)CATAACAAAGACTATAAATTTAACCAGAAATTAAACTGATTAAACACTGCCCTTAATAGCATTACTGTATCCACTTTGTCCATCATTGAATCTATCCCAAATCATAACTCCACCATATTTAGGAGAACTCTTAATAGCAGGAAGAACTTG
Unigene0013003	672	G	*	A	TTTTAGTTCTGGAAAGAAAATCCTTGACCCGCAGGGTCCTTTTCTTCAAAAATGGAACAAAATATTTGTGTTATCTTGTCTTATTGCTGTATCGATTGATCCTTTGTTCTTCTATATCCCTATGATTGATGATGACAAGAAATGTCTTTC(A/G)CGAGACAGAAAAATGGAAACCACGGCAACTGTTTTAAGGTCTTTCTCCGATATTTTTTATATTATTCATATAATTTTCCAATTTCGTACGGGATTCATTGCTCCCTCTTCTCGAGTGTTTGGAAGAGGTGTTTTGGTTGAAGATTCTTGG
Unigene0013519	149	G	*	A	NNGAAAGATGAAAAAATAAAATTTAAACAGCTCCTCCAAATTCTAAATTCTTGTTCTCATTTTCCGCTTCTTTTCTTCTTCTTCTTCTTCTCTACTCCAAGTATTTCTACTCGCGGTGGCGCCGTATCTGAACCGTTGATTTAACACTTT(A/G)CTTCCTTCTTCATCTTTCTCTAACCAGGGATACAAAATGATAGGATCCTTTATTACCAGGATACTTGTGATGGTTTTTGGCTATGCCTATCCAGCTTATGAATGCTATAAAGCAGTTGAAAAGAATAGGCCTGAAATTGAACAGCTACGC
Unigene0013530	448	G	*	A	ACAGCGACCCTTCGGCGGCATGTATCTCATATCTTCTTTTTTTTATATATATGATGATGATATTATATATGGTTGGTGTTTTTATTATTCTTATACACATGATCTCCATATCCTTCCTTCCAAAGAGATAACAATGATGGAGACATCGTC(A/G)TGGTAACGTCGCCTATCGCCTTGTGGAATCTCGAGCAATTCGTGAAAGTCCAAACCAGCTTTCTTTGCGGCACGAAACAAGACTTCTTCAACCAAATGTTGAGCAGGGTCTCCTTCAGGTTGTAATGTGATGAAAAGTTCAACTTCGGCT
Unigene0013530	1174	T	*	A	CCCAATCCAATAATCAGGTTCAGCCTTTTGTGCCAACACAGCTCTACTATCTCCCACATTCATCACATAAACATCTTCCCCTTTCATCAACATTACAAGAACACACGAACCCATCAAAGCAAGTTCTGGATTCTCCATCACCATCTTATC(A/T)GCAACATCAAGATAAGACTCCTCGGTTTTCCTCAAAGCTCGAGATAGAGCTTCCAAAACATCTGAATGATTAACAGAATCATTGTCACCGTCGTCACCACTAAGTTGCTCCTTCAATCTTCTATCAAGCTCTAGTCTCTCCCTGTCCCAT
Unigene0013611	1813	G	*	A	AATAGTAGCCTGGGCAACCTGACTTTTATGGGCTTTAATATGGTGAGCTTCGTCTAGTACCACTCTGAACCATTGGACCCTGTGGTAGATGCTATTCTCTCCATCACTTTTATATGAAGCTGATAGGACACCATATGTTGTCAAGACAAC(A/G)TCGTACTCTAACAACAAATCAACATTATCAGTTCTACCCCCACCATAATGAACAAATATGGATATGCTGCCTGATTTTGAATGTGTTTCAAGCTCGTCCTTCCACTGACCCAATAATGCCATGGGACAAACAATCAGAGTGCCACCCTCT
Unigene0013611	3364	C	*	A	AATCACATTGACATTGACAGCTTCTTCCTCAGTTTGAATAGGTAGTTCAACTTCCGTTGACTTCAGCGATTTATCTACCAATCCAGCCTTAACCGATTCCTGAGTCTCATAAACCACATCAACATCGGCACTCTCCGTATTCTTTTGAAT(A/C)GTTGATTCAACTTCAATTGATTTCATCGATTCGTCAACAGAGACAACTTGTGTGTTCGTAGCCTTTAGAAAATCGTCAAACGGGAGCATTGAACGCCGCTCCACGGAAGGTTTGACATCTTCTTCTTGAGGCTCGTCGTTCACCTTGATC
Unigene0013718	1516	C	*	A	AACCATTAGCATATGCATGGTTGCAGTAGTGGGTTCTATCCCTGCCTCTTTCATCATGGCTACCAAATTTTCAGCTTTCTGATGATCCCCAGAAGTTCTATACATTTTCATCATTAAATGGTAAAAGGAGCGGTCCAGTTTATAACCATT(A/C)GATCTAAGTTCTTCAAAAAGTTCCTCGGCCTGATCATACAGTTCCTGCTTACTGAATGCTGCAATCATGCTTCTGTACGTGTCTCGTTTAGGTTCCAAATCAAGACTTTTCATTTTATGCATCAACGACAAACCTTCTTCTGGTCTATGG
Unigene0013977	1583	G	*	A	AAGCTTTTCTATTTGCGATATAATATTCTTCTTCAACCTCAATGCTTCAGAATCAGCAAAAGTTTCTTCTAAAACATCAAGATTCTCCATTAACATACCGAAATGCGATTCCCCATGAGGCAGTTTCGTGTTATCGATCATTTCACGCAC(A/G)CTACTAAGCGACCTCTTTCCTTTATTTACCTTTGTTGTCACATCTCCTCCAAGCAAAAAATCTTTCTCTGGAGCTTCCAATGCTGATGAAGAAAACGCAAACGTCTTTCCAAAATCCTTGTGCAAAGTTTCTGATTCCTCATAAATTGTT
Unigene0014258	130	G	*	A	NNNNNNNNNNNNNNNNNNNNNTAAAAAGTTAAGATTAAAACATAATAAGCCAGATAGAAGTTGAGAATGGCGAACCCAAAGAAAATCGGAACTCCTTGGCCGGAATTCAACGACGGTCTTTCCTATCACGACGTCGTTCGACCCTCCGAC(A/G)CTGGTTTAACACTAATTGAATTTTACTCCAACAAATACAAAAGTTCAGCTCCATTACAAGGTTGGTTGCAGCGTATAAAAAATGACCAGATTACAGTTGATGCAGGAGTTGTTACTGATCCAAACACACTCCTCAGAGTTGGCTCAAAGC
Unigene0014390	1786	G	*	A	ACTTCCATCTGGCCCTGAAATAACTTCTCCATAGAATTTAACTGGATACGAAACATCGTTCCTCTGAATTTCCCAGGGATTCCCCATCTCAAGCCAATTTTCAGCAACTTCCTCCTGACCATCATTGGTTATAAGCTGTTTGAATAAACC(A/G)TACTTGTATCTAAGTCCATATCCCCATGCAGGGTAATTCAGCGTCGCCAAGGAGTCTAGGAAGCAAGAAGCAAGCCGGCCTAATCCTCCATTCCCAAGAGCAGCATCAGGCTCCTGATTAGCCATATCTTCTAAACTGTAACCAAGCTTT
Unigene0014643	1473	T	*	A	GGGGCTTGGTTCTTGTGAGATATGTCCTAGCCTTGATGCTCCATACAGCATTGCATTATCATAAAGAGTTTCCCTTATAACAGGTAAGGGAGCGCGCACTTCATCTCCATCAGTAAGACCACCCCTTGGATTAATTTGTTCACTTAAAAG(A/T)GATTGATCAGTATAAGACTCAATGTTTTCTAAAGGTGGAGTAAAAGACGATGGTGCCGGCGGTAGCACCACCCCAGATTCACTCCCAATCAAGAACAACTGAAGAGCTTCCTCAAGTTTCCAACTCGTAGCCTGAAGAAACTGTCTAGCG
Unigene0014643	1527	T	*	A	ATTATCATAAAGAGTTTCCCTTATAACAGGTAAGGGAGCGCGCACTTCATCTCCATCAGTAAGACCACCCCTTGGATTAATTTGTTCACTTAAAAGTGATTGATCAGTATAAGACTCAATGTTTTCTAAAGGTGGAGTAAAAGACGATGG(A/T)GCCGGCGGTAGCACCACCCCAGATTCACTCCCAATCAAGAACAACTGAAGAGCTTCCTCAAGTTTCCAACTCGTAGCCTGAAGAAACTGTCTAGCGGTGGCGGCGGTTTGGCCCTGAGCGACTTCCAGGAAAGAAGAGACCAATGCTTGT
Unigene0014749	786	G	*	A	GTCATTAATGTTTTCAATAATGGAGGAAACGATCTGCTACAAATTTCACTTGATTCATCTTTTGACGTGCTTGATAAAAATGGCAAGCCAAAGCCAGAAGACATAGAAGCATCTGGTCAGCTTCTTTTGCTGCCTTTTGTTGAAGCAATC(A/G)TTCCAGACGTTGATATGAATAGTAGAGAAATGCATATTACACCTCCCAAGGGACTTCTGGAGTTAAACTTACAATTTGATGATAGGTCCAAAAAAGAAAGGCGCCAACTTGATTGGAAAGAAAGGAAAAAGTTCCAAAGGCATCTCATAG
Unigene0014837	2680	T	*	A	GAAGCGTCTTTTGAATATCAGGATATGATGAAATTAGAGAATCAAGTCTCCACCTTCACCGATGATCCAGAACTCCTTTGCAACGCTGCTTTGCAGAAAATGTACTCATTACTTGAAAAATTAGAGCAAAGTGTACACGCACTCTTACGG(A/T)CTAGAGATTTTTCCGTTTCACGGTACAAGGAGTTTGGAGTACCGGTAAATTGGCTATTCGATTCGGGAGTTGTTGGCAAGATCAAGCTTTCTTCTGTTCAACTGGCAAACAAGTATATGAAGCGCATTGCATCAGAGCTTGTTATACTAT
Unigene0015229	1097	C	*	A	TAACTTGGTTTTGGATCCATTAGTAGTCATAAGATGAAGGTCGTCTTTAATAAGAACCCCCAATGAAGAACTATGGTCTGCATATTGAATTTCATAGTCACACTGTGAGAAACTTTCATGATATCCGTTCTTTTGAACTTCGAAGCAGAG(A/C)GAGTCTGCAGATGGCAGTATATTGGATCTTGTTGGCTTGTATGGGGCATTTGCTCCCTTAGCACAACTTCTGCATGGAGCATCACATTGTATCCATGTTAAGTCACTCCCTGTATCGACATCAACAAAATAACGTTTTGGAGGGTTTCCG
Unigene0015297	3051	G	*	A	TCTTGAATTGGAGTTTGTGTATACTTTCTCCAATGGGAAGTTAATAGTTCTAATACCATCCTGTTTACTGTTTCTGGTTGAGCCATTCCCGCCCAGTTTAAGAATTTGTGGCTCAATAATCTCTATTCTATGTTCATCCAATTTCTTCCC(A/G)CTTTCACAATTCATCGTATGATCAGAAACGCTCTTGTTTTTTAACTGTTGTACTAGAGCTTTCTGTGTCCACCCTATGTTATTCGGGTTCTTTGCTTTTGCATCTCTTTCAAGCAGAATTTCAACAATGTCTAGTTTCCCCTTATGCAGA
Unigene0015403	733	T	*	A	GTTGTTTGATAGCAATTCGCAATCAAAGTTATGCAACTGATATGCGTCTGTTGTGGAACAAGAATCCAGATACCATTTGCTAGGCATAAGGGCCGCTTTCAGATTCGGCGACAAATTCAACATATCCAAACTCTACCAGTTACTGCCGGC(A/T)CCACCTGGAGCAGCAGCAACTTTTCTTGCTATGTATTGAGGTTTCGTCTGGAGTCCATTAGAACCTTCAATCCCATCTTCTCCTCTCTCGTTTTTACAGCTTGGATTTCTTTTAGGATATGAACGGCTTGAAGCAGCATACTGAGCAGAA
Unigene0015445	1066	G	*	A	TTTAATCTTGATCTTCATATCTACAGCTGCTCTCCCTTTCAATAAAGGCATGTTTCGGTATTCCTCGGGCAATTCGTATGGAAATCCATCAACCATGTCTTCTTCAATACTGCAGAAATGCAATGCCCCAGGAACATCTCAGCCTCCAAC(A/G)TATTGAAGAAGTTCTTTCTGTTTTGGTCCAACGGAGCTTCGATTCCTATCTTGTAGTATCAGTTCAAACTCATCGATACCAGCTTCCAGCTTATCAATTAGTTCAATTCCATGTTCTTTCTTTGATTCAGCTAAACCCGATACAATTAAA
Unigene0015919	4239	G	*	A	AGAAAATTGGTGCATCTATGCATGGATTCACATCCATCCTCTGAATAAGTACAGGATTTGTTGAAATTTATTCAAACTATTCATTCATATTCAGGTGATTGATAACTCAAGTTGAAAAGAAAGTTTTAGGGTGATCGTCGTTGAGTTACT(A/G)TGCATTCTTTAATATCGATGGATCAGATGCTTTCATTGTTGTCATCTTTGGAGGTAGCAAGAAGCAGAGTGTTCAATCAAACACCAGTCCTCTTGATTGCAGTGGATATGGTTACATGAACTTTCTGAAGTTTACATTGCAATCTCATAA
Unigene0015999	1870	G	*	A	AGACAACCGAACAACACTTATGATAAAAAATATTCCTAACAAGTATACTTCAAAGATGCTTCTTACAGCCATAGATGAGAGTTGTCGGGGAGCTTATGATTTTCTGTATTTGCCAATTGATTTCAAGAACAAGTGTAATGTTGGCTATGC(A/G)TTCATCAATATGATTGATCCTGGTCAAATTGTTCCATTCCACCAGGCTTTTAATGGGAAAAAATGGGAGAAGTTTAACAGTGAAAAGGTAGCTGTGCTTGCATATGCTCGAATTCAAGGANNNNNNNNNNNNNNNNNNNNNNNNNNNNNN
Unigene0016072	2395	G	*	A	TTGATTGTGCAGAAGACAGGATATAAAATCAATTAGTGCGACACAAAAAGCTTCCGGTTCACTAATTTCGAAGTCTGGCTGATCGTTGTAGACTCTCAAGTAAACATTGCCAATGAACAATTCTTTCGATATTGCTTCATAGACAAAGTC(A/G)TGTGAGTCTTTAATATCATACGAACCATCAGGACCTTGAGCTGCGCGTTGCTGATCCACAAATTTCAGAAGCTCTGCTCGAGTTGAAGAGTTCCAGATAATCTCTGGTGACTCCAGGTTTGCATTTAACTTTGAAAGTAAATCTTTGGGC
Unigene0016072	2440	G	*	A	AAAAGCTTCCGGTTCACTAATTTCGAAGTCTGGCTGATCGTTGTAGACTCTCAAGTAAACATTGCCAATGAACAATTCTTTCGATATTGCTTCATAGACAAAGTCGTGTGAGTCTTTAATATCATACGAACCATCAGGACCTTGAGCTGC(A/G)CGTTGCTGATCCACAAATTTCAGAAGCTCTGCTCGAGTTGAAGAGTTCCAGATAATCTCTGGTGACTCCAGGTTTGCATTTAACTTTGAAAGTAAATCTTTGGGCATTTGATCTTTTAGCATACTCGAAAGCTTAGGAGTTAGCATAACT
Unigene0016105	1800	T	*	A	GCCTGCGTTTATTTCTCTTCCTCTTCTGGTGTTTCCCATAGCTAGAAGAACTTGAATCAGAAGACGATGAATCCGAATCTGATTCAGAATCTGAAGATGAATCAGATTCAGAATCTGAGGAATAACTATCACTGCCACTATCAGATGATG(A/T)GTATCTCCTCCTTCTCTTCCTCCTGTCTTTGGAAGATATTTTTCTTTTTCTACTTATTTTTTTGTCAGCATCAGAGCTATCATCAGATGATAAGGATCTCACTGACTTTCTCCTTTTCCCTTTCTCCTTCTCAACAGCATGCTGGCTTTT
Unigene0016202	2050	G	*	A	GAGCAAGAGTGAAAAATTTCCACCTCCACACCAAGACGGAGCTCTAGGCTATCCTCTCGGCTCTTCCCAACACATGGATCCCATGTTCGATCCACCGGACGTTCCATTCAGTTCCACAAACTTGTCACTACCCAAAACAAATATCCATAC(A/G)TGGTCCGGTCCACTGGTAGAACCCGGCAGCGTCGGCGCACCGAGGAGAAAGAAGAAACATGGCAGGTGATGGATAAACATACACAATCCAAACTCATCAAAACAAGGCTCAAAAGGATGATAATTAATGTATAACGAGTAAAAGAAATAT
Unigene0016318	1038	T	*	A	GCGAATCAGTTGAAACTTGGTTTGAGGAGCTGGGTTATTTAAGTTCTCGCTGTATATCTCAGACATAGGACTCCTATCATCAAATGAGAATTCCATGAAAGCAAGACCATTGCTTTGTGTAACTCCTTCAGCATATAATATATCCTTATC(A/T)GAAGGTTCATACTCATTGCTTGATATTTCAATTGCCCGATCTAAGAAATATTTAGCAACATCGGGAAGATTATGCAATTCCTCTCTTCTCTTATATGTTTCCTGAACAGCAGGATCTTTCCATATCTCATCCACCATAGGAGCATACTCA
Unigene0016379	1674	G	*	A	CATAGTTTGACCAACCTCGACGCCAATCCTCATAAATCACTAAAGGGATCATCAAATCTTCTTTCAAAAACTGGAAGGAAACTTAAGATAATTGTCATGGAAGCAAAGGATCTAGCGGCGAGTGACAAATTTGGAAAGTTTGATCCTTAC(A/G)TTAGGTTGCAGTATGGAAAGGTTGTTATGAAAACAAATATTGCTCCTCCTCCTCCTACTTCAACTCCTGTCTGGAATGAAACTTTTGAAGTAGATGAGAAGAATGGCGATGAATACCTAATTGTGAAATGCTTTAGTGAAGAAATTTTTG
Unigene0016556	125	C	*	A	NNNNNNNNNNNNNNNNNNNNNNNNNNTACACACCTTCCCCACAAATCAACCCTGAGATAAGATCTTAATCAGAAATCCAAGTACAATTACCAAGCTTACCAACTTGAAAGTTCCATGATGTTCCAGGACAACACTTTTGTCTCTAATAGT(A/C)TTACGATGCAATGGTCTTAATTTTATATATTTTAAGACCATCTATAATTTTTACAGCAATTTGACAAAAACAAAATGATGAAAATATATTCAGTGCATCACATTGTTCAACAAATAAATACATTGGAGACATTAGGGCTTTTCCCCATTA
Unigene0017344	915	G	*	A	TGCTGGATTTCTATCTCAATTCTCAAGAAATGAAGCCAATATTTCCTCTGCTGGCCGTATTGCAATTCAATCATTCTGTTCTCCGCAATGCAAATATGCAAACATGGAGTGGCATATGCTATCTTTTGTTAGGTCCCTAAAAGCCATGAC(A/G)CGATCTTCAAATGCTGTTGTTGTTGTAACATTTCCACCTTCACTTCTTTCTCCATCTTGTTCAAAAAGATTGCAACATATGGCAGACACCTTGCTTTCTGTCAGAGCAATTCCAGATGAGGATAAAGAAATGGCAAGACTCCTCACAGGT
Unigene0017404	2406	G	*	A	AGAGATTGCTGCATCCTTTTTTTTCTCAAACACTCTTAGCTCATTCAGTAAAGCACCAATCTGTTGGCGAAGTTTCCTTCTTTCACTAAACCAGCTTTGCTCTTGTGCAGCAAAGATCCCAACCACTTTCTCATTCGCCTTTGCATCTTC(A/G)TGTCTAATCTTTTTCAGATTCTCAATTTCCATCTCAGCACTTTTCAGCTTTTGGTTTACCTCATTTGAAACTTCCTTCTGAACTTTCCACACAATCAACCCCAAAAGCTGTGCACTTCCTTGAAGCATGGTTTTAACAATTTCAGACAAA
Unigene0017520	26	T	*	A	NNNNNNNNNNNNNNNNNNNNNNNNNNNNNNNNNNNNNNNNNNNNNNNNNNNNNNNNNNNNNNNNNNNNNNNNNNNNNNNNNNNNNNNNNNNNNNNNNNNNNNNNNNNNNNNNNNNNNNNNNNNNNTTGGCTCGATCAACAACCAATATTT(A/T)AGATTAAAGAGAATAGAAAGAAAGAGAGAATTGCCAATGTTATATGCAATAGAAAACTATCAATTTAACTGAAAAAGACATATACATCATTTTAGTTAAACCAATACCATCCACTGAACCACAAAGGTATCCTGGATTGACAATAAACCA
Unigene0017770	340	G	*	A	GGGTTTGATTGTAACCGTTATGTGTTATTCTGTTGGCCATATCTCCGGAGGACTCTTCAACCCCGCGGTGACGATAACCTGGGCCATCTTTCGCCGAATCAAAATCATCGAAGCTCCACTTTACATTGCTGCTGAGTTACTCGGTTCAAC(A/G)CTTGCGAGTTTAACATTATCTTTAATGTTTGATATTACACCAAAATCTTATTTTGGAACTGTGCCGGTTGGATCAAGTGGTCAATCTTTAGCTATGGAATTCATTATCAGTTTTCTGTTAATGTTTGTTATTTCAGCTGTTACAACAGAC
Unigene0017783	739	C	*	A	TTAAGAGAAGAGAATTCTCAACTGAAACAAGCACTGGTACTGCCAAACAACATAAACACATTTGCAGAAAGGTTGATAGTTTTTCTTTAGTGATTCAATTATACTGACAAGGATCATGATTCTTTTATTCTTCAGGCCGAACTCGAGGCG(A/C)GAAGAAGACAGCAGTGTTTAGAGGAAACAAACGCGACGGTTCAAACCAAAGCTCAGAAAGCAAGAGAGAAACTGAGAGGCTTAAGAAGGAACACAAGCTGTCATCTGTGAAGAAATCATCACATGTTGCATGAGTGGATCTTCTTGTTTA
Unigene0018051	2598	G	*	A	AAAATATGATAAGGCCTTACTGATATGCCTCTTTCATTCACCCTGTCCCTAATCTATTTATTAACTGAAAATTTTCTTCTTATGATTCCACCGGCTCAGTACATGTAGCATTGTGCGGCTGATGAACATAGGGCATTAGTATCTCCAATT(A/G)CTTCAGCGACAATCTTCCTAATTTAGGTTCTTTTGTATTTTCAATAACCCACGATATTTAAAAGATGAACTGAAATACACAGGGTGAGTTTTCCATCATTGNNNNNNNNNNNNNNNNNNNNNNNNNNNNNNNNNNNNNNNNNNNNNNNNN
Unigene0018420	4546	T	*	A	ATGGTTCAGCATAGCACTCGCTGCAATTTCATCAGTTAGCTTTGAAACCAGAGGAAAACACTTGTATGTAGCAATGCTGACACGGATTTTAACTTGAAGTGGCCATACACAACCACAAGGTGATCCAGGAGGTGTGTATGTCAACGGCTC(A/T)GAGCAAGTAACGGATAAGCAATCTTTATTAGGAGGGGGAGGGGGAAGAACTAATGCATATGCTGGCGGCGGAGTCTTAATCTTGTTCAATGATGAACCTATAGGTGAAATTCTTGGCGGAAGAGACGGAACATCTAAATGTCCTGACCGA
Unigene0018561	80	C	*	A	NNNNNNNNNNNNNNNNNNNNNNNNNNNNNNNNNNNNNNNNNNNNNNNNNNNNNNNNNNNNNNNNNNNNNNNAAAGGAATTTTCAGCTTTTCCTCGCTTATAAAAAAAACAATTTTTTCTTTCTATTGAATGTTTGCTTTCCCACGCCAAC(A/C)ATGTACTACTAACAGATATTAAGGCATTCAAGATAATAAAACTAAGTCAAATTTAACAAAACTACATGAAACAAACAGATATAAAATTCATAAAAGTATGCCCAAACTTGCATTTAATTAATAGCGCCAATAGTGCAGGGAAAATAACAA
Unigene0018579	671	G	*	A	CTCAAACAATCCTTACAAAATGAACCTAAGATTCTTAGCTGCAGACACACTTCAAAAAATCATGATCCTAACCCTTCTCTTCATTTGGAGCAATTTCTCCAAAAGGGGTTCTCTAGAATGGACAATAACACTCTTTTCACTCTCAACTTT(A/G)CCAAACACTTTGGTCATGGGAATCCCTTTACTCAAAGGAATGTACGGCGATTTCTCAGGTAGTTTAATGGTGCAAATCGTTGTTCTTCAATGTATTATCTGGTATACTATGATGCTTTTCATGTTTGAGTTTAGAGGAGCAAGGTTGTTG
Unigene0018875	69	G	*	A	NNNNNNNNNNNNNNNNNNNNNNNNNNNNNNNNNNNNNNNNNNNNNNNNNNNNNNNNNNNNNNNNNNNNNNNNNNNNNNNNNNATGAAGGACAGAGTCATAACTACACACATACGAAATATTAAATACAACAATTTATTAACCCAACAACA(A/G)CATAGGACAGAGTCATAACCCAACAACAATTTTATTAACCCATTACATTATTTTATTAAAATAAACAAGCTTGTCCTTGAATTCATGAAATACATTGAACTTCTATGCAAGTGTTTGAATATAGTCATCCACCTCAAGGAAATTCTTGAC
Unigene0019147	4535	T	*	A	GGCTCAGTTACCCTCATTTCTGCCTGCATTGTTTGAAGCTTTTGGAAATCAGAGTGCGGATATTCGTAAGACTGTTGTTTTCTGTCTAGTGGATATCTATATCCTGCTTGGGAAAGCATTCTTGCCATATTTGGAAGGGCTTAACAGCAC(A/T)CAATTGAAGTTGGTTACTATTTATGCAAATCGTATTTCACATGCAAGGACAGGAAAATCAATTGATGCTGCTAACGATTAGCAGGTTCACTGGAGAGTACATTTGCGGGTTTTGGATACATTCTTATCCAATGTTGTGTATTTTGTACAT
Unigene0019526	965	G	*	A	ATCTACTCAAAAGAGAATCAAATCGTCTTCTATTGATGTATCATTCAACAAATTCTCCTCCTGATTGTCTTGGCGACAACCATGTCTCATTTGACAGACAACAAAATGTAGCATAGAATAAGTTTCATCTGAATCGGGGTGTGTTTTATC(A/G)TGGGCAATAAATCTATGAAGGATCCCAGATATTTCAACAAAACTAAACCCAGGTGATTTTTTCACTCCTCTTCTTTCCATGGCTTCTCTCATGCTCTTTGCATCATCCCAACGTTTGACAACTGCATATACATTTGACAAGCCAATATAT
Unigene0019526	1792	G	*	A	AACAATTGTCAACAATATACTTGTGCATCATTCTTCCCTTTTCTAGAGCACCAAGATGTGCACAAGCAGACAAGACACTCACCATAGTCACTTCATTGGCTTTGGGACCAACAGCCCGCATCTTTTCAAAGACAGCCATAGCTTCCCTGT(A/G)CTCCCCATCCTTCACATAACCATCAATCAAAGAGCTCCATGACCGGACATCCCTCTCCTGCATTGACTCAAAAACTTTCTGAGCCAAAGCCATCTCCCCACACTTGGCATAGCCATCTAACATGGAATTCCATGAAACCAAATTTTTTCC
Unigene0019758	246	G	*	A	CTATCCAAACACAAACTTACACAGTCATTGCTGTGCGACTTCAACACCATGAACACTTTCACGGCGAGCTTCACCGCCCGAACATGCAGCACACGCCGCGACGCAATTCCGTTAAAACACCGCTCACTTCACCACTTCCTTAACAGACGC(A/G)TCACGTTTCTTCCCACCAGAACCACTCTCCCATCTACTAGATTCGTATGCATGGCGGAACCTTATCTACTTTTGAAGCTTGAATCTGCTGAGAAAACATGGAAAGAACTATCGGTGAAGCTTGCTGATCCAGACATTGTTTCTAATCCCA
Unigene0019914	1345	G	*	A	TGAAAAATTGGATATACCGTTCCAATTCAATCCTGTTGTTAGCAAGCTAGAAAATCTTGATTTCGACAAACTTCGTGTGAAAACCGGGGAAGCGCTTGCAATAAGTTCTATACTGCAATTACATTCTCTTTTGGCTTTGGATGATGAGTC(A/G)TCATCCTCAAGGAGAAAAACTCCTATTCTGTCAAGAAACTCAAATGGACTTCACCTTCAAAAGGTCATGCTTATGAACCAAAGCACGTCATTAGGGGATTTACTTGAAAAAGATATGGTTAATGGCTATAGTCCAAGTCCCGATTCAGCA
Unigene0020220	1153	T	*	A	TCTCCCGCCACCGCGGCCTCCTCCACGACCTCCTCTGCCGCCTCCACCTCTACCACCACCACCTCGAGCCTTAAAAGGTGTACCTCTATCTCCTCCTCTTCCTCCACCAAAACTTCTACCTCCTCTGTCACCGCCCCTACCTCTGAAACC(A/T)CCGCCTGAACCACCGCGACCTCGAGGAGGAGGAGCCATTTTTAGAGAGACTGCGAAGAGATTGCGTGAACGGCGATGGATGGTTTAGTGCAGAGCGTAATGAAATGATAAACGCGAAAGAGAGGGTTTTATAGCTCAAAGTTAGGGTTTA
Unigene0020538	179	C	*	A	TCATTTCTTAGCTATTGAAAGGATTCTAGTCATTTGTAAATCTGCTACAAATCTGCTATTTCTTAGCTATTCCATATACATGAGGATTTACAAATGTAGCATTTGATAAGATTGCCATGTCAAGCTCAACACTTGAAAATCCAGCTTTTG(A/C)TATACTCTCTCCTGTTTCCCTAGAAAGATGGCACCCGTCTGCAATTGTCTGTTGCAGTGGATCAAGAACTCCCTGTAAAAATCGGAGAAATGTTCCATCTTTTGCAGCTACATGTTCCACAAACACATAGACTCCACCAGGTCGCAACAC
Unigene0021100	72	T	*	A	NNNNNNNNNNNNNNNNNNNNNNNNNNNNNNNNNNNNNNNNNNNNNNNNNNNNNNNNNNNNNNNNNNNNNNNNNNNNNNNGTTCTTCAACACAGTCAATATAGACAGCAGAGCTAGCACGCAAAGCAACTTTAATGCTGAGTACAACAACA(A/T)CATACACGACAAAGATAACATATTTGGCCTTGGCCGTAATAATGTTACATGAAAAAATGAAGGCAGTGCCTTCAAAGCTACCTAGCTTTTGTATTGGTTGAGTAATTTGATTTAGACTATCATTCAAGTAATAACAATTACAACATATAT
Unigene0021106	1227	G	*	A	CTTCAACAATGCATTGACCTACAATCCGAAAGGTCACGATGTTAACACTGCAGCGATGCAGTTACTTATGAAGTTTGAGGAGCTTTATCGTCCTATACATGAGAAATTTGAAGAACGTGGTGGTTTTGATGATGAATTACAGGCCAGCTC(A/G)TGGAACCATATTGAGCCAGAGAGGGAGAAGGTCAAGAAGAAAGATAAACCTATTCCAATCCCCCCACCAGTTGCTAAACTGCAAGAGCCACCACCTGAGCTTGCTAGTACTTCTAATCAGCCAAGCACTTCCAATCCACCATTGGTGCAG
Unigene0021106	2638	G	*	A	GGGAGGATAAATAGATAGATGGTCAAGAAAGGTTAGGAAGAGAATGGATAGAATTAGTGCTTTTATTAAGAAAGGTTAGGAAGAGAATGGATAGAATTAGTGCTTTTATTAAGAAAGGTTAGGAAGAGAATGGATAGAATTAGTGCTTTT(A/G)TCTTTGTTTATCTTGTACACATTACAGTAAGTAGATGAATTTTACCCTCCTCGGACTTTGGAGATGGATTTGCAATTCATTTGTTGGGATTGTTAATTTGATGGAATCCACCTTTTACATTATCTAGGAATTTCAACAAAAGAAAATGAA
Unigene0022160	890	G	*	A	ATTGGCAAAGGATGCAGAGATACAAAATTTAATTTCAGACAAAGAGGCACTACATTATGAAGTTGGAAGCTTAAGACTCATCTTACAGAGGTTTCAGGGCACTATTACTAATATGAATGAAGAGGACAAAAGGTTATTCTCATCAATTTT(A/G)CAACATAAAGAAGCAAGTACAACAGATATGGATATAGCAGATACAATTAGGACGGAAGATATTGCTCAAAACAATGAAGAGAAGTCTCAAGAACCTACTTGATTGTTGTATTTCAAGGCACAGAAAACAACTAACCACATCTCTGACAAC
Unigene0022334	4129	G	*	A	CCCACCATAGCTCTCATTTTTAACAGTAGTCCCTCCCTTACTCCCATAACTCCAGGGTCTATGAAGCGATGACCAAGAATAAGCATCACCACCCCAAACATCATCAGGAAGCTTAGTATTATCCGACACACAAGTCGCACCTCTCCCACC(A/G)TGTCCTCCACCAGCCCCCTGAGTCCCCGTAGGTGACCCACTCGTCTGCGCCGGCGGCAAACCGGCCAAACCAGTAACATTTATCAACGACCCCTCAAACAAACTCGCATTTCGCGAAGCAATCGCAACAGTTCCAGCAACTATAACCGAA
Unigene0022451	22	G	*	A	NNNNNNNNNNNNNNNNNNNNNNNNNNNNNNNNNNNNNNNNNNNNNNNNNNNNNNNNNNNNNNNNNNNNNNNNNNNNNNNNNNNNNNNNNNNNNNNNNNNNNNNNNNNNNNNNNNNNNNNNNNNNNNNNNCATTGCAATTGCACAATTCCG(A/G)TATTTGGAACGCTTACTTCTGGTGCATGGGCATTGGTGTTATCGAAGGATCTCAACGATGATATGCTATTTTTTCTACAAGAACATCACATTTGGCTTTACTCTATTCTTGTATGAAGTGTGTACATCGTTCTCTGGACAGCCTGCATAC
Unigene0022964	5362	G	*	A	TGCTGCATTCCTATTACCTGAATATAAATGGACAGTCAAAACTACCGCATTTTTATCCATCAAAGAACTTTGTTCAAGGCTCCACAATGTCATAAAGGACTCCCAGGGAAGTAATGAACATGCCAGTGTAACTTCCCTTGTTCAGGAGAT(A/G)TTTCATTCTATATCCCCGAAGGTTCTACATTGCATAAGCACAATAAAAATCGCTCAGGTTCATGTTTCTGCCTCAGAATGCCTTCTGGAAATCATGAAACTCTCTGTGGCTGTGCCTTCAGTAATTGCAATTAATGAAGAATTCAAGAAA
Unigene0023048	420	G	*	A	TGGAGAAACATGCCCCATCACTGTCACCCTCTTAGACTCTACATCTATACTGAATGATGTAACTCCTTCCATCTTAGAGATATGTTTTTTCACTTTTCCAGCACATCCTTGACAGTGAATCGCAACCCGCATCACAACCACCTGAAAAAC(A/G)TTATCTGTTGGTGTTTTCTGAAGTTCTCTTGGTTCAATAGCTTGATAATTTTGATTCTTCGCCGAGTTCTCTCTAAGCATGATCTTTGGAACAGGATTGGACATAGGAGATTCAACAAGTTTGGAATATTTGGCAAAGTTGATGATTCTT
Unigene0024067	6003	G	*	A	ATTCTCAAGCTCTCCAGTCTCAGAAAGTCCACATACCCCTTCCCCCACTTTAGAGAGAGAGCCAATATCAATTATTTCAACATCTTGTAACATGGAAGAACACTGATTCAAACTATTATCGATAATTTTTTCTTGCAATGTAACCATTTC(A/G)TCAGAAGCACCACAAACATTTTCAACTTGTACACTTGTCAATTGCTGTCCATCGCCATCGCAGGCAATGATTGAGTTAGAGTGATCAACCGACGGTTCATCAGGAATGTTTGAATCACAAATACCTTTCGCCTTTTCCTCTTGCAAACAG
Unigene0024067	6865	G	*	A	AAATCAATTTCAATCGGTTTGGATCTCTTCTTCTTTTTCGTCCCTGACCTCAAATCTTCGTTTTCCATTTATAATGAACCCTAGGTTTTAACTGAATTATGGAAATTGTTGAATAATTGTTCCTCTTATGCGGTGGATTTCAACTTGTTC(A/G)TCATCAGAATCAGAAAATTAAACCTCGCGTTTGAATGCAAAATCAGAATCCTGGAGCTTTCTGCTGATTCGTAAATTGTTTTACAGGAGAGAGAGAGAGGGCGGAGGGGTGCGCAATGTAACGAGTAACGGCTTCTGACGTCGAGGGGGA
Unigene0024485	1203	G	*	A	GTTTCTAAAAAGGTCTTGTATGGGATATAGAGAGACCCTATTTCTGTGCACTGAAAGGTCAGAAACTGGGTCTGTGAGAATAATCACGTCGCTCTGGGGCATTACTACCTGAATGAAGTTAATGAAGACATTCAACACAGCCATTGACCT(A/G)CCCATCTTATTATATGAAGTGTTGCCAACAACTGTTTTTGATGATTTATTATCTACTCTATCAAGAGAAGAATTATAAATAGTAAAGACAGTTACAAATGTAATACTTCCATCTACACCTAATCTGTCATTTGAAGAATGGGTCCTGTTG
Unigene0024489	1199	G	*	A	TCTTGTTTCTAAAAAGGTCTTGTATGGGATATAGAGAGACCCTATTTCTGTGCACTGAAAGGTCAGAAACTGGGTCTGTGAGAATAATCACGTCGCTCTGGGGCATTACTACCTGCATATGTTACACACACCAAATGTTAAATGATGTCT(A/G)TTTGGTATAACTGTCAGAATGAGCTTAAGGCTGAATGACAATATGAATTACCCAATATTTGGACCGTATACACAGTTACGAGATTTATAAAATTCGGTTCAACAAAAAGTTATAAAATACTAGTTGATGATGTACTTGGTCAAACATTAG
Unigene0024864	192	T	*	A	ACTGGTATGCTTATCAGAAGATTCCTCACTTGAACCAGAGCAGCGACATACGTAGGCACAAGGAGAGCAAACCACGAGGAAACGTGACAAACAAGAAGATGATGAATTTGCCTTCTCAACTGAATTATAAGCATCTTTCCTATTTCCTTC(A/T)GTTCCAAATGCTTCACTATCCATGGAATTTCCTCCAACTGTTGAAGCATTTGCATCATGCATTGATGGAGTTGACTCTTCACCTAGTTTAGAACTCTTTAGCCCAACAATCTTTTTACTGTCTGGAATTTTAAGATACTTTTTGGACTTA
Unigene0025961	166	G	*	A	CACACAAATTTGACTTTCAACTTTCATTCCCTCGGGTTTGTGTGATTTCTTCCCAGATCTACATCTAACATCTGCGTAATCTAACAATTTATCGAAAATCCATCAAAAACTCATAACTGTCACCACTACTATCTATCTCCATCTACGAAC(A/G)TTTCACTTCACATAGCAACAACGAAGTAAAGGGCATTTCAGTCAATCCACTTTCAAACTTCAGTTGCGAAAATTCGATCATCACAAAACCAATAATCCACTCTCATACACGCTTCCATTAGATCCCGAAACCAACTCGTTGCATCACCGA
Unigene0026733	1974	G	*	A	TTTTGCTTTGATAGCAAATTGCAGGTTAACTTCCTTCCCATTATCAACACACTTCTGTACATAACCCCTGACATCTCTAGTTAACTTTCTGAATAGCATTCTAAAGAGTCCACCAAGTAAAGGACCTGCAAGGTCCAGCCTCTTGTTTCC(A/G)TAATGATCCCTGTCATCTTCGGCCCTCCGCCCAAGTGCACACAGAAGTAGCCGATGAATGATATATCCAAAATAGTACGCCTTTTTTGTCTCACAATACTCTCCAACACCAACATGGGGAAGCATCTCTTTTTGAAGGATGTCCTTAGCA
Unigene0026757	3491	G	*	A	GATCGAAAACACCTTCCACCGTTCTACATTTTAAGCCATATATAAGCGATTAAGGTAACTAACTAACTAACTTGTTATTAATTACCTGAGCATGTCTCCCGTGGGCAATTTGAGGCCGCTTAACGCCGGAGAAATGCTAAAAGTGTTGCC(A/G)TTGCAGTCGTTATTATAAAATGAAGGATGTCCAAGAGGCATAGGCCTGTCTGGAATTTGAGGAACTTCGATATCGCCTTCCAACATCTTCAAAGCATCTGAAATAGTCGGTCTCAAAGCGACCATTACATGAGAACACAGAATTCCAACC
Unigene0028625	735	G	*	A	TGAATTCCAAGCTAGTGGCATCACCCATTGTTTGTGACTTCATTAGCCTTTCCATATTTGCAGACCAACCAAATTTTCCTGACACCAGGACACAAGGCGAAGAGCTCAATCGGTTTGAAATCTGCACACTTGCAACTTTATCTCCCAAAC(A/G)TTTCTTAATCCAATCAATTGTCCCACTATATTCCTGCTTAATCTCTTTTTCCTTTTCCTCATTTTTGTCACCTAGATCCAAGTCTTCCTTGCTAATATCAACAAAATTCTTTTCCTTGTATGATTTAATATTTTGGATGGCAACCTCATC
Unigene0028634	110	C	*	A	NNNNNNNNNNNNNNNNNNNNNNNNNNNNNNNNNNNNNNNNNGGACACTAAAGTCTAAGAGGTTGCCAGTTCAGAATCAACTTCGGGACAAAAGAAAAGCCAAATAACAGAAGGATTCCAAGTGGTTTGATTTGGCAACATCAGATCCCTC(A/C)CCATTGAATAGAGAACTCAAGTAAGGGATCACCAAGACATTGCAAAACAGTCTCGTCACAATCGAAGGCATGTTCCAGGAACGTTACAAAACAAACAGTTCAAATAAAAGTGAAATCTCAAGGGGGAGTGATACGCAAAACCTTTTTCAA
Unigene0028864	919	G	*	A	GGCAAGCTCAACAGGATAAGCTTTGTGTGGGCGATAAATTTCCATCTTCTTATGAAGATCATAAGAGAGAACAAGATGGTGAGTCATGCAAAGGCGGTGAGGCTTCATGGGATGGTTCGGCCCAAAGTAAACACTGCCCGCATCACCGTC(A/G)TAAAAGTAAGCGATTCTGTCTTTGGAACGCATGTTTGGAAGAAAAGAGAGAACTGAAGAGTAATGGTTGAGTGTTGGAAAGCAGGCACTACGGTGACATTAACAGTTGCCGGAGCTTCCTCGGTGGCTTCTCTGGTATCACGAGCCAACG
Unigene0028870	799	C	*	A	AGTTGGCGGATTCAAGATAGGAAGAGAAGCCGGGGAATGGACATCATCCAACTTTCATCCATACTTACCATCACAAAATTACCTTACCTGCAGGTTTTTCTCTGCAAGGAAGCACGGGCTGGTCGATGCTGTAGTGAGAAACAATCCATT(A/C)GATAAAACGGCTGTTGTTGCCCTTCCTGGTGGGGTTGGTACTCTAGACGAGATGTTCGAGATGCTGGCATTAATTCAACTAGAACGAATCGGATCAAAGCATCCTGTTCCCTTCCTGTTGATGAACTACGATTCATTTTACTCAAAACTT
Unigene0029304	151	G	*	A	ATCAATTGCAATTGCATCGCCCTTCGAGAAATTAGCATGTATTGCATTCGCCACCAACATGACTTGTTGTCGAAGTTGTTTGAGAGTCATACGATTAACCTCGGAGTCATCATCAAAACCTTCAAGCCTCCACACGATGGCTACACTGTC(A/G)TCTTGTTTGTTAGGGTGGGAGCTGGGTTGCAGACAACAATCGGCAATGTTAAGGACAGAACCAGGAAGCCAGGTTCCTCCGTGTTTCGATGGGTTGGAAGATGTATCTAAAATGCGATTTGGAGGTTGAACAAAGGAAATAGAAAGTTCC
Unigene0030104	672	G	*	A	TAAAAAGAACTCTTCCCAAGGAGCTAGTAGCAGTATGCCCTGCCCTTCTTTTCCTTTTCGCCCCGTTCTACCTAACCGGTGTATATATTGTTGTTTATCAGTCGGTAGGCCAACCTGTACAACAAGAGTAACATCTGGATAATCAACTCC(A/G)CGTGCGGATACATCCGAAGTAACAAGGATGAGACCCTTTGACCTGCGGAATTCATCAGAAATTCTGGTTCTGTAACTCTGAGGCTTTCTTGAATGGATTTCTCTCACATTCAAGTTCAACTCCCCAAGGAGATCAGCAACAAGTCTTGTG
Unigene0031115	655	G	*	A	AAATGGTGGCTGCTCTGACTCTAGGCAGACATCTACTGTACCTTCGGAAGATTCAACACCATCAAAACATAGCCATAAATCTGGAAGAACTCCATGCTCAAATGAAGAAGCATCAGGGTATAACTTGGGTAAAGGTGTCACTGGTTTTTC(A/G)TTGGAGGCTTCTGATCTAGCCAATTTCCTCACAATGGACAGGCATATAGGGTTGAATTGCAACACACAAATTTTTCTAATATCCATGCTGTCTGAGAAACAGGAGTTATGTTTCTCTGTAGTTTCCCTACTATGGCACAAGTTGATTGCA
Unigene0031903	2166	T	*	A	CCTCCTTAGAAATACCCATATCTCGGGTTGCAATCACTACTGCTTGGTAAGTCCTCTGAGGATTCGGCGGTGAGTTGTCAATGCCATTTCCATTGGTGATTACTAAAGAATCACTAGCCATAATTTGAATCAAAAAGCCTAGAAACGTTC(A/T)GCAGAAGCTCCCACCAACTACTTGCTTCAGCAATACCGAGAAAATCTAAAAGAAGAAAAGGAACAAAAGGAATGGGAGAAAAAGAGAAGTAGCTGAAATTGAAAGTGAGAGAGTAGAAAAAGTGCCTCGGAAAACAAAGAGAAAAAAGAG
Unigene0031967	1135	T	*	A	AGCTCTAAGCTTTTCATCCAGCTGAGACAATTTGAAAGGAAGTGCTGGGGGGCCTCTCACATTTGTACTAGATGACTCGGTCCAACCTCTTTCAACTGCAAGTGATATGATTGGAGCAGATGAAAATGCACGCAGATAGGAATGACTGCC(A/T)GTATGAAGATCAAGAAAAATGGATTTTAAGGGGGCAAAATTCCTTATCCCAAGTTGTCGGTTCAGCAACCTCATTGCAGTATCGAAATTTCCAGCAGCTGCATGCTCAGCAGCAAGTGATGATTTCTGCACCCATATATGGCTTACTGGC
Unigene0031967	1825	G	*	A	AAGTTCAGTTGCAAGCCGTTCAGCAACATCCTGCAACCCATGGACTGATGCAGCAATGTAAGCAAGAGGCAAATGGCCCACATTCTCCAAGACCTTAACGCGTTCTCGAACATCGCCCATATATAAGGCATTGTGAAACTGGCCCATTAC(A/G)TCATTCTTCACTTCAGCAATTTTCAACATCTTTGAAAGTTTCTCCAAGTTGCCCGTTACAAGATAAAGGAAAGACAACCTCTCGAAANNNNNNNNNNNNNNNNNNNNNNNNNNNNNNNNNNNNNNNNNNNNNNNNNNNNNNNNNNNNNNN
Unigene0032503	1130	G	*	A	GCAATAGAAGGCGGTAACTTAACCGATATATTGGATCGAAAGGCCGGATCATGGCCATTTCAAGAAACCTTAGACTTAGCTCGATTAGCTTTGAGTTGCGCTGAGCTTCGACGTAGAGACCGACCCGATTTATTAGACCACGTACTTCCC(A/G)CGCTGGAGAAGCTGAAAGAAGTTGCTGATAAAGCTCATCATTCCGCTTCAATGGTTACTATCAAACCTAAACCTCCAAACCATTTCATCTGCCCTATACTTCAGGATGTGATGGACGATCCGTGCGTTGCTGCAGACGGATACACGTATG
Unigene0033264	1086	C	*	A	CAATATGGTGTTCCTAGACTTTAATGCCTTTCTGTATGCAGTTCCTGGCAAATTCAAAGGAGCAGAAACAACACCTTTCATAAAAGAGACATACTCTTTTTTCAACTCTTCTGTCTCAAGATTCCATGGATCCAAACTCATGATTTGTTT(A/C)GCCATTAAATTGAAAGTGAACTTTTTTGCTTCACTTTGAGCTGAGAATGTGCAATTATTTTTCCAAGAGCTTAAAACCAAAAGGGTATGATTCTCCATATCTTTCAAAAAATGTGTTTTAAGCCTAGCATGGCTCATAAAATTAAGTGAA
Unigene0033460	390	T	*	A	ACTTGGAGGTGGTCAGGATGCATCAGCTGTTACAACTACTGATCACCGTGCTGGCAAATTTGAAGCCAAGTTCTATGATAAGATTCTTCAAGAAGAAATTGGGGGCGTGAAAGGGCACTTTGGACCAATCAATGCTCTAGCCTTTAACCC(A/T)GACGGGAAAAGTTTTTCAAGTGGAGGTGAAGATGGATATGTACGTTTGCATCATTTTGACGCAGATTATTTCAATATCAAAATTTAGTTACTGAGAGAATTCCTGGTTGATATAAAGTCTGGTTCCTCGAAGTTAGCTTTCAATTCCTTT
Unigene0033462	151	G	*	A	TTTTAGGCACAAATGTATCCACTTTGGTTTACTACTTATGTGGAATGTACATTTTAACTTGCAAGATTCTACAAAAAGGAAGTTACTCGATTGGAAGACGCGCTTCAATATTATAGAAGGAATTTCTCAGGCAATACTCTATCTTCATAA(A/G)TATTCAAGACTAAAAATCATTCATAGAGATTTGAAAGCTAGCAACATACTTCTTGATGATAATATGAGTCCAAAAATTTCTGATTTTGGCATGGCAAGAATTTTCTCACAGCAGGAATCAACAGTAAATACCAATAGGATTGTCGGGACA
Unigene0033462	392	G	*	A	ATGGCAAGAATTTTCTCACAGCAGGAATCAACAGTAAATACCAATAGGATTGTCGGGACATATGGATACATGTCTCCTGAATATGCTATGGAAGGAATATGTTCTACAAATTCTGATGTCTATAGCTTTGGAGTGTTGCTACTTGAAATT(A/G)TTTGTGGAAGAAAAAACAATAGCTTCTATGATGTTGATCGTCCACTAAACCTAATAGGCCATGCATGGGAGCTATGGAATGATGGTGAGTATATGCAGTTAATGGATCCATCATTAAGTGACTCATTTGTTCCTGATGAAGTGAAAAGGT
Unigene0033684	631	G	*	A	AATCTGATCCTTTTCCTCGATCCCATTTTCATGTCTAGATTTGTGTGACTTCCTTTTCTTTGAAGCAGTATTAGTTTCAATAGTGTAATCTTTCTCCTCTTTCCCATTTTCTTGATCTGGAGCATCGATTTTAGGTCGTAATGGAAACTC(A/G)TCCTTTGATTCCGTCTGATGGGTCTCTGGTTCAATAACTGACATTCCTGATAGAATGAAGTCTAACAAAAATGTGCTTCTCACAAGTCTATCTATTCTGCCAAAGTGCCTCTGACTATATGGTATAAGACCTTCAAGTAGTTCCCCGACC
Unigene0034044	2960	T	*	A	GATCAAGAGAATGGTTGTCCCGGATGCGCTTAAGGTACTGAGGCTTCAGAAGGGACACAAATATTGTCATCTTGGTCAACTTTCATCTGAAGTAGGGTGGAACTATTATGATACCATAAAGGAATTGGAAAACAAGAGAAAGGAAAGATC(A/T)GCATTGGCTTATGAGAGAAAGAAGCAGCTCAATAAATTAAGGGTGAAAGCTGAGAAAATTGTGGAAGAGAAACTTGGTGCCCAACTCGAAATTCTTGCTCCTGTCAAGTACTGAGTTGGCTATGGTAGCGTTTTGATATTTTGTTTTCAA
Unigene0034044	3151	G	*	A	GGGTGAAAGCTGAGAAAATTGTGGAAGAGAAACTTGGTGCCCAACTCGAAATTCTTGCTCCTGTCAAGTACTGAGTTGGCTATGGTAGCGTTTTGATATTTTGTTTTCAAACATATCCAGTTGAATTCTATTTATGTTTAGTTCTGTGTT(A/G)TTGAACACTAGATATGATTATTTCAGAAGTTGTTTTTATGTTTTGCTCATTAAGATTTCTATTACTGAGAAATTACTTTGAGTGAATTTTGAAGTTCATTATTGTCCTCCACCATTACTACTTTCATCAGGAATTACCGCCAGTAGTCAT
Unigene0034169	472	G	*	A	CTTGAGTGTGCCATTATGCATGAACTCGTACACAAGAATACTATTATCTTCTTCTCGACAATACCCAAGAAGTTGTACCAAGTTTCTGTGATGTATTCTTGATAGAAGAGTCACCTCATTGGAGAACTCGCGCTTGCCTTGATAGGAATT(A/G)TTCCTAAGAACTTTAACTGCTATCTCTTTTCCTTCTTTCAGTTTTCCATAGTATACAATTCCAAAACCACCAGAACCGATTCTTCTCTCAAAGTTGTTTGTAGCACTTTCAATTTCAGCTAAGCTGAAGCAGTGAGCCGATTCTGCAGGA
Unigene0034169	1414	G	*	A	TTTCTCAAGATACTTATTTATCTCCATGGCATTAAGAAGAGGCCCCTTGGACGAATCGGAGGTCTTGCCGAATTTAAAAGAAAGCACAAAAGGTAGGGTTAGATTGACAAATCCCGGTTCATAAAGGCGATATTTCCCAAGAGCATTTTC(A/G)TCAATATTTACAATGATCTTGCTAATCTCAGGCTGGTCTGGAAGCACAAGCCTGAACTTTCTAGACTCAGTTGGACGCAAATCTTCAATCTCTGCAAAATAGGTGACTGCCCAAGCAATGGCAGGAAAGCCATCCAAATTCAACCGGTTG
Unigene0034227	45	T	*	A	NNNNNNNNNNNNNNNNNNNNNNNNNNNNNNNNNNNNNNNNNNNNNNNNNNNNNNNNNNNNNNNNNNNNNNNNNNNNNNNNNNNNNNNNNNNNNNNNNNNNNNNNNNTCAGTCATGGATAGGATGATGATGGAGTTTCACTCACATGGTAT(A/T)ACCATTCAAGAGATTGAAAATGTTCTTCACAGAATTCCTATTCATCATAGAATCATACCTGCAATCAAATCAGCGCATGCTTTAGGGTGTGATTTGAGGATTGTGAGCGATGCTAATATGTTTTACATTGAAACTATTTTGAAGCATTTG
Unigene0035187	154	G	*	A	TATACGTAAGCCAAGAATAATTGAAAATGAAGATTCTTCATTCTCAACACACATTGCTTCCTTCCTAAACTCTCTCTCTCTCTCAACATGGGCTCTATTAACGACGACGTTCCAGAACTAGAACAGGGCCTTCTTCAGGATGAAAGGAGC(A/G)AACAATACACAGGAGATGGTTCCTTTGATTTTAGATGGAAGCCTGCTATTAAGCACAGCACTGGCAATTGGAGAGCTTGTCCATTTATTCTAGGCAATGAATGTTGTGAACGTTTGGCTTTCTTTGGCATTGCGACAAACCTTGTTACCT
Unigene0035808	68	C	*	A	NNNNNNNNNNNNNNNNNNNNNNNNNNNNNNNNNNNNNNNNNNNNNNNNNNNNNNNNNNNNNNNNNNNNNNNNNNNNNNNNNNNTTCAGATTTCGTCTGGTAAGCAACGCGACACGTCGTCGTTTTGACACAGTCGGTTCAATTCTTCAAT(A/C)CATACCGTGATTCTGAATCATTTCCTTCCCTTTACCTCAATTTCGTTTTCAGAATTTCGTCAACGAACCTCACTCTGCTCTGTTTCCTCATGTCATCATGGCCTCAGGTTCAGATTTTGCTTTAACTGTCCCTTCTGAACTGGAATCAGC
Unigene0036547	71	G	*	A	NNNNNNNNNNNNNNNNNNNNNNNNNNNNNNNNNNNNNNNNNNNNNNNNNNNNNNNNNNNNNNNNNNNNNNNNNNNNNNNNAAGTGGTTCTATTCCTGGCGAGCTTGGGAATTGTAAAGAGCTTTCTGTTGTTGTGCTCTCCAACCTTTTC(A/G)ATCCGGTTGGGGATGTTGAGTTTGTTACTTTGAACGATGAGTTGAATTATTTTGAAGGTGCAATGCCAGAGGAAATTGTGTCGCTTCCTAAGCTTAGGATTTTGTGGGCACCCATGGTGAATTTGGAGGGAAGTTTTCCTAGGAATTGGG
Unigene0037831	1418	G	*	A	GGAAGCATCTCCCCCAGCTGCATCAGCACTGTATCTACCCGTTCTTGGACTGGTAACAACTGATTTTGTATCACACCAAACACCAGCAGCAGTGTCCAACACTGCTACACTAGATGAATCTTCTACCATCCGTCCTCCACCAAGAGCCCC(A/G)CCAGACACATGGAGTCTTGCATTAACAAACACCGCTGCATGCTGATATCTTGAAGATGGTGAAACACCTGGGGCAATTGCCCATTCCCAACGACCATCTCTATGTTTAGCAAGTCCATATGCACTAGCCAGCGGAACGCTATTGGCATCC
Unigene0037851	818	T	*	A	TAGTCATAGCATCTTTTTTCAGTTTCAGCACCGATTGAGAAGAGGCAGGTGACGATGATAGAGGTCGCTCAGTTGGCTTGCCACTTGCTGATTTCTGCCGGGTTAATAATCCCGGAGAATTACCTTTCAATGGTACATTTTTTGATCCCC(A/T)GTTTCCCTGACTAGCCAGCTGAGGGAAATCAGTCTGCTTAGTTTCTTGCTTGGATTGTTCAATTGGACCCCAAAACAAGTCATCATCCCCTTTATATTTTGATTGGTTGGAAGCATGTGAGTTTATTGGAAGTGGTGAGGAAGCTGAGTT
Unigene0038023	614	G	*	A	CTCCTCTGGTCTTGCTTGCGGTCTTGCCGGGCTCTCTGCTGGTATGGCTATTGGTATTGTTGGTGATGCTGGTGTTAGAGCCAATGCACAGCAGCCCAAACTTTTCGTTGGAATGATTCTTATCCTTATCTTTGCTGAAGCTCTTGCCCT(A/G)TATGGTCTCATTGTCGGTATTATCTTGTCTTCACGTGCTGGCCAGTCTAGAGCCGAATAAGTAAGAAGTTGTGTTGCAAAATATTCTTTGACCACAAACCTTCTTATTAAGAGGGTGAGGGGTGAATTTTTAGTTGTGCCGTTAGTGATG
Unigene0038442	101	T	*	A	NNNNNNNNNNNNNNNNNNNNNNNNNNNNNNNNNNNNNNNNNNNNNNNNNNGTAGAATCCACGCAGTCCATAGGGACACCACTAGAGAAAGCGCGAAAAAGAGAACAATCAAATAAAAAGATTAAACTAAACCCTTCCATTTTCTGAGTTT(A/T)TTCAGCGCTAGGGTTTTGCATTCAATTCGTTCTCGTTCTCTCCTCCAACAATGGCCGATACAAGCTCTGTAGACGTGTCTCTGTGGTGGGACTCATTCACTCTCCTCTTCACGGAGCTTGAAAATTCCTCCCTCTCCTCAGATCTCTCAC
Unigene0038457	291	T	*	A	AGAGCAGCTCTTTAGTGACAACCTCAATTAAACCAACATTGGTTGAAACCCAACCATTATAATATAACACAAAATACAACATGTTTAAGCATCATCAAGAGCAAGGACTCCAGGTAGTGGCTTCCCCTCAAGAAGCTCTAAGCTCGCACC(A/T)CCGCCGGTAGAGATGTGGCTCATCTTGTCTGCTAGTCCAGCCTTCTCCACGGCGGCTACAGAGTCACCTCCTCCAATGATGGTTGTTACTCCTTTGCCACTTATTTCTGCCAGTTTCTTGGCTATGGCCTCTGTTCCTGCGGCAAACTTA
Unigene0038817	5547	T	*	A	ATCTTGAGTTGTTCCTTGGAGTTGGGCTTTCAAAGCAAGAATTCTAGAATTAGGATTCATAAGAGCAGAATCAGCAGTAATAGGTCTCCTCAAAGGTTGATTTGGCACGCTCATATCAACAATCACAACACTATTCTGCGGAGATGTTTC(A/T)CGAACACATATATACTTATCGGATTCCATAGTCACATGTGTAAATGTGAAGAACTGAGGATTTATGCCAATGCTTGGCAGTGTGAGGGCTTCTCGCATGAGGATCGGAGCATTGGCGGCCGCCATGGTGATTTGGATCGGAGGGTGAGAT
Unigene0039072	1023	G	*	A	GGTCATACATGATGAACTCATAAGTAGTCACCAAGACATTAAACTTCAGAGCAGAAACTTGATGAAATAATTTCGATCGATAATCTTTCCCTCCAGCATAAAAAATGCATGTCACAGATGGTTGACTCAAGGAATAACATCTCAAAAACT(A/G)TTGTCTGCCGCAACCACACGATCATACATNNNNNNNNNNNNNNNNNNNNNNNNNNNNNNNNNNNNNNNNNNNNNNNNNNNNNNNNNNNNNNNNNNNNNNNNNNNNNNNNNNNNNNNNNNNNNNNNNNNNNNNNNNNNNNNNNNNNNNNNN
Unigene0039197	557	G	*	A	TTTGAATATGTTGAAAGTATGGTCACCCAAATAAGCTCGATCATATCCACCCAAAGAAGTCTTTGCTCAACTGGTATTACACCATAAGTAATTAGATGAGCAAATGGCCACAGCTTCCATCCCGCAGTCAACATGGGAAAGAACGTTGCC(A/G)TCAATTCATTGAAAATATTGATTGGAGAATCAAAACGCAGGAGCCCTACAGCCGTATAGTAAATGCTATTCCAAACAGCCGACCATGCGGTTTGATCGAAGGCAACTTTGACAGGAACTACCCACCATTCTTTATAAGGAAATAGCTCCT
Unigene0039305	352	T	*	A	AACAAAATCCTTAAAAAATAGTGGGGAATCAAATAACATTGCAAATAAAGCTGCAAAATTGATGTACATAATTCTGTTCTATAATTTGGAAGGGATTGGAGACCATCCTGTTGATATAATTCTTTTTGCCAAAAATCCTGTAGATAAATC(A/T)GTCTAGCCATCTATTCATGTTTGAAGGCAAAACAACTTATAGCTTTAAAGAACAGCCATCAAATCCATATGGAGGGGTTTCTAAATTGTGTTGCCATAGCATCTGATAGAAACTTGACTAGGTTCTCTCTCTCAACATTTTTCTCCTTCT
Unigene0039485	1540	G	*	A	GTAGCACTCATATGCAGCTGTAGAATTTCCATTCGAATCATGTTCAACTGCACGTTCAAAATTATCTTTTCTAACCCTAGCACGCTTGTTCTCTTGTTCAACCTTCATTGGTAGAAAACCCCCATCAAATACAAGAATAGGTTTAACACC(A/G)TAATGGCGAAGCAAATTCACTCTATGCATGCAATACTCAATGTGCCTAGAAGTGGGTATTCCTTTGCAGAGGTCAGTGCTGCAAGAGAGGGCGCCCTTGTGGAGCCAAGAATATGTGTCGATGGCGACAGAGCAGCCGTGAAGGTCTTTG
Unigene0039560	288	G	*	A	ATTTAACATTCACCACCACATGCTGAAATTGAAGTTCAAAGTTATAGTTTCGCCCAAACCGTGTATCTTACGGAGATGTCATTGTGGTTCCAAACACATACTTATTTAATTCTAATTGGTAGACATTCAATTTTTAAACAACAATAGGCT(A/G)GTCTTTATCTTTGTCTCCGGAGAGATTCAGTTTAGTCCATTTGACACGCCATGTCAAAAGTAAGAGCGCTCCAGTTTGACACACAAGGCCACAAATCAGACCAATCCATAAACCCTTATATTGCAAATTGGTCTTAAATCCGAGAAAACA
Unigene0040184	727	T	*	A	TGAATTCTTTGAGGCAGATAAGGAGGATAAAAAAGTGCTCCCCCAGTCAAAGAAGGACGATCAAAAGACTCTTGACGCTGGTTTGCTAAAAGCCATCGAAACTGTTCCCGACTTGAAAACTTACCTTGGTGCTAGGTTTTCCTTGAAGGC(A/T)GGAGTGAAGCCTCATGAGTTAGTATTCTAGACGATACAGGAGTCCTGAAATTGTTTTTTGCCCTTGTTTTTTTGGTTGTTTGTCAAACCCAGATCTTAAGTTTTTACCAATTACAATTTTCTTGGTATTAGACATCCAAAAACTTGTTAT
Unigene0040466	314	T	*	A	CTATGCAAAGCAATTAAGCAAAATTGCACAACAGATTTACAAATCACATACATGGGTGACTCCAAAATGATGCACGTGCATTCTTGCCTCTCTCAACAGGAAGGAGCATGTTGATTCAAGAACTTGCAAATTCCCGGTACCAGTCGCAAC(A/T)GCGTTATTCCAACTTGGGTAGTACTCTAGAGATCACATTAATTATTGATCAAAGAATGTGTCTTCCAAACATCAACACATCATGTCATACAAATTGAAATTATTGAGGACTAAAATGCATGTCTGTACTCGCCATTCTGTCAGTTCCTAC
Unigene0040727	106	T	*	A	NNNNNNNNNNNNNNNNNNNNNNNNNNNNNNNNNNNNNNNNNNNNNTTGTTTGCTTTTAGAGTAGTATTGCATTAAATGATCAAATTGTATCAAAATTGTAAGGGTAATAAAATTTTCATTCAACTCCCCTAAAGCAAAGCATTTGAAATT(A/T)AAATGCTTACTCCACAAGCTATTATTGCAACTATAATTTCAGAACAATTCCAAACTATTACAATTGGTTCTATCAAAGGCAATATCTTACATGCTACGAGGTGCACCACCACAAACAATCCAGTAAAACTGGGTAGGGGAAAATTATAGG
Unigene0041131	2630	T	*	A	AGGGTTGTCTGTGGGGCAATTCGTGCAGTTTTGGCCTATTGTATTGTTATTTATTTATCCTACCAGATTCTGAAATGTATCATATGAAGTATCGGTCCTATTTATGCATCAAGGTTGCAGACATTTGTTTATCCAATCTACAGTTTGTCC(A/T)CAATTAGAAGTATTCCGTCAACATTATTGAATTTATGACTTCATTAGTGTAGATGAATGGGATCAGCTGTTAATTCTGTAGTGGGGTAAGTTGGTGATTTTGATTGGGATCAGGGATTCATTTTTTAAGGGTCAGTTGAAAATAAAATTG
Unigene0041186	588	C	*	A	AAATGAATCAACTCCTTCAAGTTCAAGCTGGTTACCAACATTGCTCCAATCAATACCCAATTTCTGAATAGCATTGTATATTCCTTCAGCTTCAGATGCATTTGAGTCTATTGTCCTGGCTACAGCACCATGATCGATAAATGCTAGAAG(A/C)GCTTGGTCTGGCATGGTAGATACGGTGTCGGGTCCAATAAGAGGAGCAACATATAAGGTGTCAGAGTAGGCAGGATTCTTAACACTGGTAGAAGCCCAAAGGAGCCTTTGCTTTTTGGCTCCCTTTTTAACTAGAGCTTCCCACCTTGGA
Unigene0041186	933	G	*	A	GGCTACTGCTGCCTTTCCACGCAGATTAAGGGCCTCTGGAGTGCCAATTTTCTCAAGGCTTTTATCAATGAGAGTGTCCACTCGACTGACAAAGAAAGAGGCAACACTTGTGACTCTTGAGAGATCATTTAAACCAGATGCCTCAAGACC(A/G)TCCAAGTAAGCATCAATTACAGCTTCATATCTTTCAAGAGAGAATATCAAAGTCACGTTCACACTTATTCCATTGGCAATCACTTCCTTTATTGAAGGGACACAAGCAGCTGTAGCTGGAATCTTAATATAAACATTGGGGCGAGAAACC
Unigene0041186	1143	T	*	A	CACACTTATTCCATTGGCAATCACTTCCTTTATTGAAGGGACACAAGCAGCTGTAGCTGGAATCTTAATATAAACATTGGGGCGAGAAACCAATTTATGGAGCCATTTTGCAGCTTCTATGGTTCCTTCAGTATCATCAGCAAGACTAGG(A/T)GATACTTCAACAGACACATAGCCATCACCACCATCAGTTTGGTCGTAAATTTGTTCAAATAGTTTGGAAGCGTCTTGAATGTCCTTCACTACAAGTTCCCAATACGCACTTTCAATGTCTTTCCCTGCTTGCACAAGTTCCCTGAATTGA
Unigene0041224	520	G	*	A	CAATTTCTCCTTCATATCCCTCACAATTTCTCGCTCTGCAGAAGTGGTGAAAGTGTAGCCACGCTCAGTTAAAATCTTCATCAACCCATCAGTTAGATCACGTCCTGCAAGATCCAACCGAAGAATCGCATGTGGAAGTGCATAACCCTC(A/G)TAAATAGGAACCGTGTGACTAACACCATCCCCAGAATCCAGAACAATACCAGTTGTACGGCCACTAGCATAAAGAGAAAGCACAGCTTGAATAGCAACATACATAGCCGGAGTATTGAACGTCTCAAACATGATCTGAGTCATTTTTTCC
Unigene0041341	479	G	*	A	TGCTTCTAACCAATGTTGTTCGAACTGAATATTGTAAAGAGCTTCTTCCAACTTCGCTATTTGCTCTAACAAAGGGTTGAAATGCTCGTCTTTTGCGTGTTGCTCGAAGTAAGAGAAGTGACCAACGTGCACATCAAAATCGATGGTCTC(A/G)TGATAAGGAGATTTGTTAGTGAAACAGAACTTATGCACCCCTGATTTGTGAGCCACAAACTCAAACTTTTCACTGGTCTTGTCGCGGAAATCTTGAATTTGATCACCAACAGGTCCCTTTACCACAAGATCAACACCTTCATCACCATAA
Unigene0041341	850	C	*	A	GTGAGAAACACTCATCTCTATCTATCACAAATCTGATCCCTTCTGTTACTTTCAACAACGCCACTATCAAAACAAACACCAACATATTTTCCCCCAATCCCATCTTTCTTTCTTGGATTCACTTCTCTGAGATTAATTAGATGAAGAAAA(A/C)AAAGAAGAATTCGGAAAGAAAGAGAGACAGAACAACGATGAAGAGGTGAACGGAGAGTTTTTTATTTCAACGAAAGTGTTGTATTTTTTTTGTTTTTGTTTATTATGGTTTTCTGATTTTTTGTAAACTGGAAACGGCGTCGTTGGCAAT
Unigene0041359	1164	G	*	A	AAATTCAAATAAAGCAGAAGCCCATGGTGAAAGCTGAACAGATATCTTATCAGCAGCAACACCTTGCCGGAGTAAACCGTGAATTTCCTTTAAGAGTGCATAGACTTCAGGAATGCTCTCAATCAGACCTTCTGGAAGGAGGATTACTCC(A/G)TGATATTTGTCTTGCTCTGCTCTAGCCTGAACTGCATCAGAAATCTTTCGTGAAATTTCAAAAAGGGTAAGCTTCGATTGAGCAACCTCCTCCCCGAGAATTACCATGTTCGGATGGGACTGAAGAGTGCATTCCAAAGCAACATGTGAT
Unigene0041366	1216	T	*	A	GGCTAGCAATGGCCTTGGTTATGGTGCAGCATATGGAGGTTATGGCGGTGCTACCGCTGGTTATGGTGGACCTGCCGCTGCAACGTATGGGAACCCAAATGTCCCTAATGCTGCTTATGCTGGTGGTGGCCCAAGGAGTTCATGGCCCGC(A/T)CAGGCTCCCTCTGGCTATGGCTCTATGGGTTATGGAAACACTGCTCCTTGGGGTGCTCCAAGTGGTGGTGCTGGATCTGGTTCAGCAACTGCAGGTCAATCCCCCAGTGGAGCTGCTGGATATGGGAATCAAGGTTATGGGTATGGTGGT
Unigene0041367	1006	T	*	A	TGAGGTATGGGACGGTGGCGTCGGATTTGTATCAAAGGAGATGATTCAAACACATTTGCCTCCTCCAGCGCAAGATATTAAGATATTGAGATGTGGTCCGCCACCAATGAACAAGGCAATGGCTGCTCATCTTGAAGCCCTGGAATACGC(A/T)CCTGAGATGCAGTTTCAGTTTTGATCGACCGGCTACCGGCTTCATCACGGTGCATTCAATGGCCTTACCTGATTGAGAAACTCTTACCATTTTTGTTTTGTTAAGAATGTGTGAACATTGGATCCACAATGCATTTAGTTTCACAGCTTG
Unigene0041372	994	G	*	A	CCATGAGAACTTCAAGGGACAAGCCAAAGAAAAAGGAGAAGAATGTTAAAAAGGATCCGCTAGAAGGAAAGATTGGAAATGTTTATATTCCAGATCAGAAGATCGGAGAAATGGATTTGCCCAATAAGTCAAAAGGAGTGAAGAGGGAGC(A/G)CCGAGAAGCCAAACGGAAAAGTGGGAGTGATGAACATGCATCCAAAAAGAAGAAGGAAGATTCTTAAAATATTATAAATTACACTTGTTGTCTTTTGATTATGAAGTAATCCATTGTAGAATCAAATTATATTAAGATTGCATGTAGTTT
Unigene0041397	102	T	*	A	NNNNNNNNNNNNNNNNNNNNNNNNNNNNNNNNNNNNNNNNNNNNNNNNNAACGACTTCAATCAACGGCTACCGTTCCTCATTTCCTCGTGGCCAATATCTGACCGTTCATTCCCTTATCGAATTCTTCCCACAAAATCTTCATCTCACTA(A/T)AGTTGAATATTCACTCACACTCATAATCTTTCTTTCATCACCGATCTCATCTCAATTTTCAGGGTTGATTGATTGTTATACTGATTCGATATGTCGACATCGGAAGATAACCCGGAAGTGTCGGAGAGGGGTATTTTCAAGTCTGAGAAA
Unigene0041397	609	G	*	A	AATCCCTTTGATTGATATCAATTATTTGATTGAGAGTGATGGAAGGAAGCTTGTTTCCGGTTTGATACCGGATGCAGGTACTATCCATTCTCATGGAGAGGAAACTGTGAAGATTCCTCTTACTTTGATTTACGATGATATTAAGGAAAC(A/G)TATGCTGATATTAAACCTGGAAGTATTATTCCTTATTTGATTAAGGTTGAACTTATCTTTGATGTTCCTGTCTTGGGAAGGTTTACGCTACCTTTGGATAAAACAGGAAAAATTCCGATTCCGTATAAGCCGGACATTGATATTGATAAG
Unigene0041437	1657	C	*	A	GGAAACTGGTTTTCACAGCTGCTTGTGTAGGCTTCCAGCAAGAGCTCCTAGTGTTTTTGTTACTAGTAGTAACATTGGAAAGCGGAAAAGCGGATCCTGTGGAGCAAACACCAGTACAGGTCTTCAATGTAGCCATGATAAAGTTCGAAG(A/C)TGAGAGAAAGATCCGAATCCGAAGCGAATTTGATGTGGTAAGGGTGAAACCTATAAACCCTAGAAGCGTGATTGAAAACGGCGTCGGTTTGAGTGTTAAGATGGTGGTGAAGTGTTGGCAATGCGGAAGAGAAGAGTGAAGCTAGCGGCG
Unigene0041444	415	G	*	A	GCGGTTCGGAGCATCAGCTTCACTATGATATCCGACACACCAGGCATCCACCATTACAAGATCCATATCCTCAATCCCTCTTCTTTTCATTGCTTCTCGAAATGGAGGGAAGTCCTTCACAACAGCTTCACATTCAGCATACTCTACAGC(A/G)TCCATTGGTGGCTGAACATTTGGCACAACTTCAGAAGAAATGACTTTGCCTCTGTGTTGGCCACCTCGAGTTGCTGCATGAACTTCTCGAAGTTCGACAATCCATACGCTTGTCTCATTTGACCTTTTATTGTAAACAACAAGCCGTGCT
Unigene0041450	203	G	*	A	TTGGTGCCATAACAATTGCTTATAGCTTAGTTCTTGAGCTATATCGCACAGATTGTTTGATGATCGACCATAAATTGTTTTTGAATAATAGTAAGATATATCACATTTTCTTTTAAGGAAAAAAATAAGCACTCGAAGCATTATAACAAC(A/G)TGAAAGAATCTCCACTCCACAGTCCATACAACACGAGCTCATAATTTACACATAGATAAAAAAATAAACAAGAATGAATACACCGAATAGATAATTCAAAACAACAAGACATGTCAATGATGATGATGGATTCATTAGCCCCTTGTCTTG
Unigene0041450	440	G	*	A	ATAGATAATTCAAAACAACAAGACATGTCAATGATGATGATGGATTCATTAGCCCCTTGTCTTGAAAGGAATTGCTCGAATCACGATCTGGTGATATAGTGCAGCAAGGGCAGCTCCAATAAAAGGTCCAACCCAGAATATCCAGTGGTC(A/G)TCCCAAGCATGGTCTCTGTTGTATATTATGGNNNNNNNNNNNNNNNNNNNNNNNNNNNNNNNNNNNNNNNNNNNNNNNNNNNNNNNNNNNNNNNNNNNNNNNNNNNNNNNNNNNNNNNNNNNNNNNNNNNNNNNNNNNNNNNNNNNNNNN
Unigene0041458	389	G	*	A	TGCCTCATCTACAAAAAAATATCACAACTATAGCACAAACCCCCAACAGAAACTCGGAATTATTTTGACCTAAGCCCCCACCTCAATCAGAAGCAGAGAAAGAATACTGCATTAAAATCCACCTGAAAATTTATATAAACACAACCTGCC(A/G)CATTGGTCTCCATTTTTAGACTTCCATTGCTGAATAAACCATGGTCCCTTGCCTGTCAGTAGCTGCTGCCCATGGGCATGCCAAAAGGAGGCATTGGAGGCATCCCAAATCCGCCGCCCATTTGAGGGGGAGGGGCAAAGCCANNNNNNN
Unigene0041470	570	T	*	A	TGTCATTGGACCCACACCACCAGGAACAGGAGTAATCCAACCAGCAACTTTAGATGCTTCCTCAAAATCTACATCTCCAACAAGTCTATAACCTGATTTCCTAGTTGGGTCATCCACAGAATTTGTGCCAACATCTATCACTGCAGCTCC(A/T)GGTTTTATCCAGCTTCCCTTGATCATCTTTGCCTGTCCTGCTGCTGCAATAACAATATCTGCTTCACGAATGATAGTTTCTGGTTGACTTGTGTGTGAATGAACAATGGTAACTGTAGCATCTGCTTTCAGAAGCAGCAATGAAGCTGGT
Unigene0041510	118	G	*	A	NNNNNNNNNNNNNNNNNNNNNNNNNNNNNNNNNTGAGAGCCAGTCAAGTCCTTCATAAAGTCCTTCACCAGAGGTAGCACATGTGCTCTGGATATACCAGTGACGCTGACGAAGTGAATGAAGTCCAAGCTTATCGGTTATTTCAGCAGC(A/G)TTCATAGCATTTGGAAGATCTTGTTTGTTTGCAAAAACTAGAAGCACAGCATCTCTCAACTCATCCTCGTTTAACATCCTGTGCAGCTCATCCCTAGCTTCCACAACACGATCTCGGTCATTGCTATCAACCACAAAAATANNNNNNNNN
Unigene0041531	1494	G	*	A	TGGCAAGGAGACTGCGGCTGTTACTGCAGCAGCCATGTTTGTTGTTGTTGTTGATGATGGAAGAATCTAGAAGATGGAGGAAGAGAGAGTAATGTTGATTAATTCAATGAAGATATGTATATGCAGTGATTGAGTGATCTATAGAGTAGT(A/G)TCGTTTTTTTTTCTGGTTGAACAGAAGATATTATGATTGAGTGGATGAAATTTGTAAGACAAAGAAGTGGTAGATATCATGTAAGGATAAGTCTATCTGTATGTATGTATGATACTTAAACCTGCGATTACCATTTTAGNNNNNNNNNNN
Unigene0041548	35	T	*	A	NNNNNNNNNNNNNNNNNNNNNNNNNNNNNNNNNNNNNNNNNNNNNNNNNNNNNNNNNNNNNNNNNNNNNNNNNNNNNNNNNNNNNNNNNNNNNNNNNNNNNNNNNNNNNNNNNNNNAAACATTTTATTAGGGTTTTGTATCACTTCACAC(A/T)CCTCTGATACCAACCATGGCTTCAACTATCGATTTTCGCAATCTCGATGAAGGCTTCGGCGGCAAAACCTACAAGCGCAAACGTGAACAAGCTCAAGCAATCGAGGATGCAAGGATGGAAGAAATCCATGCCATGGAGATGGAGACCGAC
Unigene0041577	711	G	*	A	CAACAGAGACGAGCGTGGTTCGAGAACCTATTCGTTTATGATACGAACGAAGAACCCTTGTGGTAAAGTTTCAAATCAGCTTTACTTGACTATGGATGATCTTGCTGATCAGTTTGGAATTGGGACACTTCGTTTGACTACTAGGCAAAC(A/G)TTTCAGCTACATGGTGTTGTTAAGAAGGATCTTAAAACGGTTATGGGGTCTATTATTAGAAATATGGGCTCGAGTCTTGGTGCGTGTGGTGACCTTAACAGGAATGTGCTTGCTCCTGCTGCTCCCATTGTGAGTAAAGATTATCTCTTT
Unigene0041649	2247	G	*	A	GAAAAGCACAACTGCACGCACGGTCATGATTGGAGGAAAGGCATTTGCGACATACACAAATGCTAAACGGATAGTCAAGCTTGTTGATGATGTTGGTTCTGTTGTAAACAGTGATCCTGAAGTCAATAGCTACTTGAAGGTTGTGTTTGT(A/G)CCAAATTACAATGTATCAGTGGCGGAGGTGCTTATCCCAGGGAGTGAGCTGTCGCAGCATATTAGCACGGCAGGAATGGAAGCAAGTGGCACAAGCAACATGAAATTTGCATTGAACGGGTGCCTCATAATCGGTACATTAGATGGAGCT
Unigene0041670	1452	G	*	A	CTGGAATGTTTGCTTTGAGGGAGAGGAGGGTGCATGTGACACAGGAGGATTTTGAGATGGCCGTGGCCAAGGTGATGAAGAAGGAGACAGAGAAAAACATGTCATTGAGGAAGTTATGGAAGTGATTTGTATTTTATGTTTGTGGTGCAC(A/G)TTGTCCTATGCAGATTAACGGAAAACACACACCTTATTGGTCTTTCAGTTTACAGTCACGCTTATGTTGACTAAGTTATGTACCAAAATCATGATCATTTCATGTTTAATTGCACTTTTTTGTTACTCTCTAGTTTGGATTTGTGTGAAT
Unigene0041680	711	G	*	A	AACAAGGTGACGGAGATCTGCTTTGTTGCCAACAAGCATCACAACAATGTTGGAATCTGTGTGGTTTCGCAGTTCTTTCAGCCATCTGTCGACATTTTCAAATGTTGCATGGCGGGTGACATCATATACAAGAAGTGCACCAACTGCCCC(A/G)CGATAGTAAGCACTGGTGATGGCACGATACCTCTCTTGACCAGCAGTATCCCAGATCTGAGCCTTAATGACTTTGGAATCAACATTTAAAGTACGAGTAGCGAATTCAACACCAATGGTGGATTTGGACTCGAGATTGAACTCGTTCTTC
Unigene0041727	377	G	*	A	GTCCTAGAAAAACCAAGAACCAAACTCTAACGAGGAACCAACAATGACTCTCAAAGGTTGCAATACAATGTAGTATAAGTTTTTTGTGGTACAAGTGGTAGCTTATGGTTTCAAGAGGATGGTAGTCTCTGCAATCATGGAAGTAACAAC(A/G)TATGGGTCCATGTTAGATGCTGGCCTCCTGTCCTCAAAATAACCCTTCCCTTCTTTCTCTGTGTCCCTTCCAACCCGAACCGAAGCGCCTCGGTTTGCAACACCCCATGAGAAGGTATTAATGTCAGCTGTTTCGTGTTTCCCTGTCAAT
Unigene0041727	467	T	*	A	ACAAGTGGTAGCTTATGGTTTCAAGAGGATGGTAGTCTCTGCAATCATGGAAGTAACAACGTATGGGTCCATGTTAGATGCTGGCCTCCTGTCCTCAAAATAACCCTTCCCTTCTTTCTCTGTGTCCCTTCCAACCCGAACCGAAGCGCC(A/T)CGGTTTGCAACACCCCATGAGAAGGTATTAATGTCAGCTGTTTCGTGTTTCCCTGTCAATCTGCGCTCGTTGCCTTCTCCATAAGCGGAGATGTGCTCGGCGTGCCTCTTCCCGAGCTTCTCAATTGCTTTCTTGATGATTTCATATCCA
Unigene0041739	1489	G	*	A	CTTCTTAACAACTTTCTTAGCACTTTTTGCAGGTTCCACAACTTCAGAAGACGATAATACCTCGTCAAGCTGCTGCCTTATAAACTTCTTAAAGGGATCCAGAGAAAATTCATCAAGTTTAAGATCTTCCTCCAACAGTCGGCGAAGACC(A/G)CCCATAGTGATTTTCTCTGCATTATCCTTGAGGTATGAAGATCTTTTTCTAATAGCTTTCTTAATTAGAGCCTCGTTGGGAACTACTTTTTTTCCATTGCCTTCTTCTTTCTTAGACTCTTGTTTAACTCTCTTTTGTTCTTTAAGCAGA
Unigene0041754	243	G	*	A	ACAAACACCTCGAACTCTATCTATCTCACTCTGCAACTAGCAATGGCTTCACAAACTCTCGTCTCACCTTCACCTCTCTCTTCTCACTCTCTTCTCCGAACATCTTTCTCCGGCGTCTCCGTCAAGCTCGCTCCCCAATTCTCAACCCTT(A/G)CAACTTCCAATTTCAAACCTCTCACCGTAGTTGCGGCTGCCAAGAAAGCCGTCGCTGTCCTTAAGGGCACATCCGCCGTCGAAGGTGTCGTCACTCTCACTCAAGACGATGAAGGTCCAACAACAGTTAATGTTCGTATCACTGGCCTTG
Unigene0041783	118	G	*	A	NNNNNNNNNNNNNNNNNNNNNNNNNNNNNNNNNTTTTTTTCTCTTTCTTCTCGAAACCCTTGTTCCCAACCTCGTTCTCTTTCTTCCTCTCCGTCAAACCTTTCGTTCTCACCTCGATCCAATGACCACCGCGGCCAGACCAACTTGGGC(A/G)CCTGCTAAAGGTGGAAATGAACAAGGCGGTACTCGAATTTTTGGTCCTTCCCAGAAATACTCCTCGAGAGACATAGCATCTCACACCACTCTCAAACCCAGGAAAGACGGCCAGGATACACAGGATGAATTGAAGAGAAGAAACCTACGC
Unigene0041814	109	T	*	A	NNNNNNNNNNNNNNNNNNNNNNNNNNNNNNNNNNNNNNNNNNGTTTGTTTCAGTTTAGGATAATATCGAACTAAATTTAAGAGTGTTTAAAAGATTCAGAAAAAAATATGTAATAAACATTCATATCTAAAGAAACAACTTTTATTCCTT(A/T)AACTCAGCATTTTTATTGGAAATAAGAATTCCAAACACTCAATTAATTGGGCATTTGTTTATTCAATCTCAAACATCAACCGTGCCACTTTCACAACATATCTGGTTGAAACAACCATTTGAAAAGAGTGTTTCCACCATTTGAACTCAT
Unigene0041825	31	G	*	A	NNNNNNNNNNNNNNNNNNNNNNNNNNNNNNNNNNNNNNNNNNNNNNNNNNNNNNNNNNNNNNNNNNNNNNNNNNNNNNNNNNNNNNNNNNNNNNNNNNNNNNNNNNNNNNNNNNNNNNNNATTTGAGAGGTGCATTGATAATAAATCATC(A/G)AAGACAGAAAAACAGAGAGAAGCTCGTAAAAGTAAAATGGCAAACAGGTACTGGGTGGTGTCTCTTCCCGTCCAGAACAACAGCTCTTCCTCTACGATATGGAACCAGTTGCAGCAAAATATCTCCAAACATTCCTTCGACACTCCTCTT
Unigene0041846	70	G	*	A	NNNNNNNNNNNNNNNNNNNNNNNNNNNNNNNNNNNNNNNNNNNNNNNNNNNNNNNNNNNNNNNNNNNNNNNNNNNNNNNNNGAAAGTGGAGAAGTGACCATTGTAAACACCGCTTTCATCCAAATGACCGACGTTGATCTGAACCGAAGC(A/G)TGATCCTTGGCGGTTATCAATCTGTTTGTAGCAGAACATTTTCTAGGAATATAGAGCTCGGTGATTTGGCCTTCTTCGTTCTGCATCTTTAGGGTTTGTGATGAATCTAGAAACCCCTGAATTATGAAATGAGTATTTGTTTTTAAGTAA
Unigene0041891	58	G	*	A	NNNNNNNNNNNNNNNNNNNNNNNNNNNNNNNNNNNNNNNNNNNNNNNNNNNNNNNNNNNNNNNNNNNNNNNNNNNNNNNNNNNNNNNNNNNNNTATGCTCTCAGCTTTTGCAGGAGTAATCTTCACGCACTTCCCATGGTACCACCTCTC(A/G)CATATATCACAGCCAATCCAAAATTCATCCGCATTGTAGTGTCCACCGCAGCTCCCGCAAAGGGTTTCACTGTGCTCGTCTTCTTCCTCCTCGTAACCTTGATCATCGGCTAACTTTGGGATGTTTTTGACTTGCCCGTCACTCGATCTC
Unigene0041895	1306	G	*	A	CAAAAGATCAAGCTTCTGAGGTAATGTTTCCATGTACCGCAAATCACCAACTCTAATCCCATTGCGGTTAGCTTTGCTGGAGTAGCACGGACCAATGCCTCTCTTGGTGGTGCCAATGAAAGACTTAGATAGCTCAGCTTCCCTCAGCCC(A/G)TCCACGGTTTGGTGGAAATCGAACAACAGGTGGGCCCGATCCGAAATTAGTATCCTTCCCTTGCATGAGACCCCATTTGACTCAAGGTTGTCAATTTCTTCAAACAACCCCGGCAGGTGTACTACAACACCATTCCCAATAACACACAGT
Unigene0041912	1570	G	*	A	CAATAGTATTTTTGGATCGTGAAACTTCTTGGGCTGCTGCTCAAATCCAGCATATGAAAATGTCTTTTTGAAGGCAACGCCGTTGACAAGAAATGAGTCACGCATGTTACCTCCAGGAACCTTCTTTATTCCAATCATATTTAACCTATC(A/G)TCAGTCCCAATTGCAACTACAGCATCGACAACCATGGAAGCAAAGAACTCCTTCTCCCCTCCTATAAGCTTTGAAGAAAGTGTTGTAGCAGCACACTTTCCTAGCAAGTTTTTCTTCTCTTCCAGACTTTTTCCCTCAATACTAACAGCT
Unigene0041982	778	T	*	A	TGTTTTCATTATTGGATGGTCAACTGTGAGACCAGCAGCAGCCATGAATCCAAGGGCCTCGTCAACACGGTTAGCAAGCTCTCGGTACCTATCTCCTTGTTCACTTTGTTCAGTGAAATCCAAGTTCCATTGAGTAACCCTCTGCATAGC(A/T)GCATAACCACCAGTAGCAAAAGCTCTGAGAAGATTCAGAGTAGCAGCAGCTTGACAATAAGCACGAATCATCCTCTGTGGATCCGGTGTCCTTGATTTCAAATCAAACGCATCACCGTTGATGTTATCCCCTCTGTAACTAGGAAGCTTC
Unigene0042031	544	G	*	A	AGCTGCTGTTGGACATACTGCTGGTCTTTTCAATTTGGGAAATACTTGTTATATGAACTCAACATTGCAATGCCTCCATTCTGTGCCAGAGTTGAAGTCGGCTTTGATTGATTACTCACATTCAGGACGAAACAATGATGTCGATCAGTC(A/G)TCTCATATGCTGACCGTCGCAACCCGTGACTTATTCAGTGAGCTTGATAAAAGTGTCAAGCCCGTAGCCCCTATGCAATTTTGGATGGTATTGCGGAAAAAGTATCCTCAATTTGGCCAGCTGCATAATGGAGTGTTCATGCAACAGGAT
Unigene0042087	214	G	*	A	TTATATTCCAAGATACAAACAAAAGAAAACTGCAAGCATTCTATTCTACGTAGCATTTCAATACTACCAAAGTAAAGACAAACACTAACCATAAGGATGAAAACAAACAATCAAATATAAACATAGCGAATACATAAACATAACAGTACC(A/G)CTTAATATTAAAGCTAAACATCCAAATTCAGTTAAATATACACAAAAAACACTCCTTTAAAAGCATAAAATAGCAACGTAATAACAAATATTATATAACCAGAGTGAATCGTTATTCTTCAATGAGAAAACAAGAGGAGCATTAACCTCT
Unigene0042107	1010	G	*	A	AACCCATAGCATGTGAGCAGAGCAATCATAATGAAACCCGGAAGTAGAATCCTCCCTGGTAAGTGATTGTTCATAAGGGAGAAGCAAACACTCATGGGAGGTCCAAAAGTCTGTTGTAGTCATGATTGGATGGTCAGCTGTAAGTCCAGC(A/G)CAACTCATGAAACCAAGAGCCTCATCCACTCGATGCGCCAATTCACGATACCTGTCTCCCTGTTCACTACGCTCCATGAAATCAAGATTCCACTGGTTGACCCTTTGCATGGCAGCATAACCTCCGGTGGCAAACGCCCGCAAGAGGTTG
Unigene0042108	1832	C	*	A	CCCGCCAATGGTTAGAGTGGAGAAGATGTTTGAGATCATTCAGTCTAAACTTCCCGGGGCTCCTCAATTCCTTCTCTGTTTGCTTCCTGATCGAAAAAACTGTGATATTTATGGTCCATGGAAAAAGAAGAATCTTGCTGATTATGGAAT(A/C)GTCAATCAGTGCATGTGTCCTGTAAGAGTCAATGATCAGTATCTGGGTAATATAATGTTGAAGATCAATGCCAAGCTTGGTGGGCTGAACTCATTGTTGGGTGTTGAAAGTTCTCCGTCTCTTCCTATTGTTTCCAAAGCACCTACTCTC
Unigene0042108	2309	G	*	A	AGATGAGGGCATCATAAGGGAACTCTTGCTCGATTTCTATAATAGTTCTGGGAAGAGAAAACCGGATAACATTATTATTTTTAGGGACGGTGTTAGCGAGTCACAATTCAATCAAGTCTTGAATATCGAACTTGACCAGATCATTGAGGC(A/G)TGCAAGTTTCTTGATGAAAATTGGAATCCAAAATTTGCGGTAATTGTTGCTCAAAAGAACCATCACACAAGATTCTTCCAGCCCAACGCCCCTGAAAATGTCCCACCAGGTACTGTTATTGACAATAAAATTTGTCATCCCAGAAACTAT
Unigene0042108	2815	C	*	A	AATTCATGAAATTCGAGGATAAATCTGAGACATCCTCAAGCCATGGTGGGCTGAGTGCTGCAGGAGCTGTACCTGTCCCTCAGCTTCCAAAACTGCAGGAAAATGTGTGCAACTCCATGTTCTTCTGTTGAGGCTTATAAGCCTGTTTCT(A/C)TGGAGACTAGTGGTGACATAATGTTGTATATATAACTGTTCCAACCTAACTTTTGAACCTTGTTAGTCGCTTTCAAGTGCAAGCTTTCATGCATCTATAGCCTTGTTTTGTTTTTGTGGTAAGTGAAATATGTGTGTGCCTTCTGTTTTG
Unigene0042168	619	G	*	A	CAAGGAAAAGTCATTATACCAAGAGGTCTTGGTTTTTGAGTCATTAACATATGGGAAAGTTCTTGTTCTTGATGGGATTGTTCAGTTGACTGAGAAGGATGAATGTGCTTACCAGGAGATGATAACTCATCTTCCCCTCTGTTCCATTCC(A/G)TCCCCCAAAACTGTTTTAGTTGTTGGTGGCGGAGATGGTGGGGTTCTAAGGGAAATATCCCGTCACAGCTCTGTGGAGCATATTGATATTTGTGAGATAGATAAGATGGTTATTGATGTTTCTAGGAAGTTTTTTCCAGAGTTAGCTGTT
Unigene0042177	765	G	*	A	GAAGACATGAATGTTGTTGTAGCATAGTGCAAGTGTTCCAATTGCCATTATCTGAGGAATAGCACAAAAGCGAAATATAGAGGGGTCTCGTAATGCAGACATGTATTTTAAGCAATCTTCAGCATGCAGCAAAGCATTAGTGACCATGTC(A/G)TTTAAGCATTGCACAGCCTTAATGGAGTTTTCCTCATATTTCAAGTCCTCAAGTTTGCTAACATATTTACTCCAGATCTGCCGTGGCCAAAACATGCGTGACTTTGGTATCTCATTGATGTCTTCCAGATAATCTCTAATAATATTGGTT
Unigene0042177	1583	C	*	A	GTTCCGGCGGGATCTGCTTCTCGGCGTTCCTGGCCGCGATTTTGAGTTTCAGCAACGGATATAAGTCATCTGGATTCTTCAGAATCACTCCCAAAATTCCCATCTCGTTCTGTTTCTACTTTCTTTCTCGAGAAATCGAAAGATCAATGG(A/C)GAGAAACTGTGACCATTTGAATTTTTATCACTATATATTGAATCTTTATTATTAGCGACAATTCGGCGGCGATTGTGATAATTTTGGATAATTGGAGTTTTTTTTGAGGTAGGAAAATATTGATACCAACCACTCCTATTATTTCTCGTT
Unigene0042239	498	G	*	A	TATAAGTTACAAATCTCTTCCCTTGAAGAAGGAAGTGAAGAAATTGATACACCTTGTTCTCCACGCGATTGCGTTAATACTTGGAATAATTGGAATTTGTGCTGCGTTCAAGAATCACAATGAAAGTGGGATTGCCAATCTGTACAGCTT(A/G)CATTCATGGCTTGGAATTGGGGTTATTTCCTTTTATGGCATTCAGTGGATATTTGGGTTTGTGGTATTTTTCTACCCTGGTGGGAGTTCAGAGATAAGACGTGAGTCAGTTCCATGGCATGTGTTATTTGGGCTGTTTGTGTATATTTTG
Unigene0042266	619	C	*	A	TTCACTTATCGCTATCTCTTATTCAAGCCTGACCGGGAAGAACTTTTCCAAATCTTGAACAAGTCAGCTTCAGATATCTTGGGCCAGTAAGATGTGATGCTGAAATGTTGCTCCAGATTATGATTTTAAGCGCAGATTAGTATTAATCAG(A/C)GGCAAAAAGTTCACTCCTATGTCAAATTACAGTTCAAGTACATAAATGAATTGAAGCTTAAGTCCACTATGTTAACTTTGTGTACAAAATTTGAAAAGACTTAAATCGATGGTTAAATTGATCACTACATAGTGAATTTGTTTTGTTTAC
Unigene0042291	672	G	*	A	TGGCCTAAAGCTTGGTTCGATCTCACGTGCATCTAACTTCTTCCAATTGATCGGTTTGAACCACTTGTGCCCTTTAATTTCCGAAATCCCTTTAGCTCCACAACCCAACCGCTTTGGTGCCTCCTTCTGTAGCAGCCCTTTCAACAGTGC(A/G)TGTGCTTCACTTGACAAATATCCTGGCAGCTTAATCTTATCTTTCACTATCTTTTGCTGAATCTTCTCACGGTTCCCACCACAGAAGGGTGGCTTCCCAGTAAGCATCTCAAACAGTAAGACACCTACACTCCACCAATCAGCAGCCTTA
Unigene0042343	347	G	*	A	CTCTTCTTTGAACTCTTGCACTCGTGTGGGAGCTTCGTCTTCTTCGCTGCAACTCCAATTTCCTCTTCGAACTCGCTTTCTTCCGATTGGTACTCGCCGTCTCCCCGCTTCCTCCCGCCCTAGATTCCTGGTTCAAGCAAAGAAACAAAC(A/G)TTTTCCTCCTTTGATGATTTGCTTGCTAACTCTGACAAGCCTGTATTTGTTGACTTCTATGCAACCTGGTGCGGTCCTTGTCAATTCATGGTTCCCGTACTCGAGGAAGTAAGCACGCGGCTTAGTGATCTGATACAAGTAGTTAAGATT
Unigene0042402	951	G	*	A	CACCAACTTTATGCATGTTTTGATGAGCCGGGGGATTGAAAAATCACGGCGAGCCATCATGATTTCGTGAAGTTACGAAGTGTAGTATGTCAAAATTATTGTAGTTTACTGTGATTTTGTTAATCTCATCTGATTCCAAATCTGCACTTT(A/G)TCTCTATTTTGAATTGCTGTCATGAGAACTTGATTTCTTCTTTTCTTGCCTCATAATTAAGTTAATGGTTGCATCTGTTACACTAAGTTTGGAGAGATCCAAATGCAAAATATATACATGCCCTTTTTGGGGGGGGACAAAATACATGTC
Unigene0042575	1081	G	*	A	AATGGCTGAGGCAGTTCAACCATTGACTGATGCTGCAAAGCAGTATCTTGCTAGCCGATACAAGGATATAACCAAGTACCAGGAAGAGGTTATGAGCTTACCCCTAGTTGGAGTAGAGGCAATATTATCTAGTGATGATCTCCAGGTTGC(A/G)TCAGAAGATGCTGTTTATGACTTTGTGTTGAAGTGGGCTAGACAACAGTATAGCAATCTGGAAGAAAGACGACTAGTCCTAGGTTCACGGCTTGCAAGATTAATTCGCTTCCCTTATATGACCTGCCGAAAGCTTAAGAAGGTCTTAACT
Unigene0042635	829	C	*	A	TCTTTTTGAGGGCTCGTGTGTTGTGTGGCGGTCATCATCTCTGTATCTCTTCCTATGGTAATCTCTACCATGCCGATGGCCACCACCATGACCATGGCCACCACCGTGACCATGACCACCACCATGTCTACCATAAGAAGGAATAACTGG(A/C)GGAAAAGTTCCCAAAGAACCAGTGCCGTAATCTACAAGCTGCCTTTGTACTTCTAACTCTTTCTGAACCAACTTCCCATATCCACCCCTACCTGGATCATAATCAGTGCGATATTCATCACGCACCTGGCCACCACTACGCCCGCGACCC
Unigene0042643	284	T	*	A	ACTTGTAACAGTTATAGAAATTAAACTTCAAAACTATTTTACAAAGTTATCCGTGTCCCGTTCTCCCATAAAAAGTTTGCTCATTGCGTTGAATTGCTGAACCTGAAAAGCAGTTTCCCAGTTTCACAGACGCGTGCAAATATATCTTAC(A/T)GTATTATTATACATAACATAGCCCAACACGTTTGACAATCCATCAAATGTCATGTTTCATAAGATAAGCTACAAACCTTATAAGGGAGAAGTTTAAAACCAAGATATTAGCTTTCTCACAAACATACAATAGACTGACTTCTCCGTCCTC
Unigene0042644	1788	G	*	A	ACGCTGTGTCAGAACTTTAAGACCTTCTTCAGGTTTGGAAATGTCAAGATAAAAATTGAACCTTGTAATTTTACTTTCCGATGCAACAAACAAATATTTTTTGCTCTCGGAAGCTTCAAGGTCAATAGAAAACGTATCATCCTTTTCCTC(A/G)TAAAGACAAGTATCTTTTGATTGTTCTGTTCCCAGCACATGAAGCCATGCCTTGTAAGGCCTAAGAATAGTATCCATTGTTACATAAACTAGAGCATCATCACCAGCCCATTCAAGGTATGATGTTACACCAACAAGAGGCTCTCCAATT
Unigene0042738	690	G	*	A	GGATTGCATAGCTAAGGCAATTGGTGCTTCTAGCACTGATAATTTCCCTCAGGAGAGTATTGATCATACTCTAGAGGAAAGAGACAACATTGCTGGTAGATTTTCCTATTGGTCGAGTAGCGGACAAAGCAATCCCAATGTGCCTGAGAC(A/G)TTAACATACCAGCTGGCTTCTCAAATATGTGTTATTACAGAAATCAATATTCAGCCTTTCCAAGCTCACTTTCAGATGGGGTCACCAATATATTCAGCAAAATCTGTTAGGTTTAAAATGGGTCATCTTAAAGCCTCTTTAGATGATTTA
Unigene0042820	665	C	*	A	TGCAATTATCACAGGAGGAGCAAGTGGTATAGGCTTGGAGACAGCAAGAGTGTTGAGTCTTCGAAAGGCGCATGTCATCATTGCAGCAAGAAACATGGAATCTGCAAAGGAAGCTAAACAGATTATCCTCCAAGACAACGGATCTGCTCG(A/C)GTTGACATAATGAAGCTTGATCTTTGTTCAGTGAAGTCTGTTAGATTGTTTGTGGAAAATTTCCTCGCTCTTGATCTTCCTCTCAACATTTTAATAAACAATGCTGGAGTGATGTTCTGTCCATTCCAACTATCACAAGATGGAATTGAG
Unigene0042820	1589	C	*	A	TATTAAGATATCCGCATATGATTTATAAGCTCTATGAAGAAAAATATGTATACATATATGTGATTTGTATTACTATTATGTGCTCGTAATATAGAAGTGTTGTTCTGTGTATGAGACATTTTCTTCCATGCTTTAACAATTAAGTTAAAT(A/C)GTAGATCTTTTAAAACAATTGTTTTCTGAGATGTCTAAATAATTTAGAATGTGTTATGTTTGTTGGAACAAGATCAAATTTGTTCAAGGTGAATCAATGGTGGAAGTTGTTATTTTGGNNNNNNNNNNNNNNNNNNNNNNNNNNNNNNNN
Unigene0042939	1029	G	*	A	AAAGATGGGAAGGATGGAAAAGAAACAGCAACTAAACCAAATGGATCAGCACCAGAAGTTGCACCTGAAACACAACCAAAGGATGCTGCCAATATCGAGGCCACAGATTTACCTCTGAAAGAAGCTCCTGCCACTGAGGAGCAGGCTGCT(A/G)CATAACTTTGTGTATCATACTTGAGTTCTCACAATCTTCTGTTACTTTTTCCTTTGCATTATTAACTGTTTTTTTTCTGCATGCTTATAGTTTGTATGGCCTTTTTTGTTTTTATTTCCAACGTTCTGGTTTTGTATCAATTAAATCCAT
Unigene0042939	1085	G	*	A	AGTTGCACCTGAAACACAACCAAAGGATGCTGCCAATATCGAGGCCACAGATTTACCTCTGAAAGAAGCTCCTGCCACTGAGGAGCAGGCTGCTGCATAACTTTGTGTATCATACTTGAGTTCTCACAATCTTCTGTTACTTTTTCCTTT(A/G)CATTATTAACTGTTTTTTTTCTGCATGCTTATAGTTTGTATGGCCTTTTTTGTTTTTATTTCCAACGTTCTGGTTTTGTATCAATTAAATCCATTATGTCTATTATGACCTTGGAAATTCAAATGCTACATTGGTTTTATTACATTCTTT
Unigene0042955	1186	G	*	A	CCCAGGCCCAGGTCGGAGACGTACTCCTCCTCCACCTCCAAGACGCCGTTCACCTCCCAGAAGAGCTCGTAGTCCTCCTAGAAGATCTCCAGTTGGTCGTAGGCGTAGTCGCTCTCCAATACGTAGATCTGCACGCTCTCGCTCAAGATC(A/G)TTCTCACCTCGCCGAGGTCGGCCACCTGTGAGACGGGGAAGATCATCATCTTACTCTGATTCACCAAGTCCTCGTAAGGTATCCCGGAGATCAAAGAGTCGAAGTCCAAGAAGGCCTTTGAAAGGAAGAGCTAGTAGCAACAGTAGCAGC
Unigene0043081	826	G	*	A	TGTGTCTTCTTGATATCAATGATTGAAGCACCATTCAATGCATCAGAAATGAGTGAAGTGTCATCAGAGTTGGATTCTGAGGTAGGATCTGCAGGAAAATCCAATTCAATATAAAATCCATTCAGAGCTTCACCATTCTGCAAATTCGGC(A/G)CATCAGTGGCGTCGACCGAAGGGATCTTTTTGACGGTTAAAATTCCAGATAGTGTATCAAATTCAATAACATTGCTGTCGGCCAAACCGGATGAAAAGATTGTGTGTGAAGCTGCTAATGTGGCATGACCACAAAGTTTAACCTCAGTAG
Unigene0043112	328	G	*	A	TTTAAACAAATTAAGATTTGAACAAAGAACTTCTACATTAACTGCTAACTTATTAACTAGAGAACAGAAGTTATCAGAAATCAATCAGCCTTTCTTTGGCATTGCTGCAAGCCTCGTGTACATTCTTGCCATGGACCGGTACCCTCTAAC(A/G)TCACCTGAACGCAGAAGATTACCTGAATCACAATTCAGTGGGCTGTCAGGTTCTGGATGAGCCATCAAAGCAATTATAGCCCTACAGACAGACTGCAAAGTCCAAGCAGGGCTCCAAGCAGTTTTCAAGATATCTAGGCAAATCTCCCCT
Unigene0043159	2625	G	*	A	TCATGCTGTATTTAGTGAAAACTGGGTTGTCTACCACTATTTTAATCTCAGGGCTCATAGACATGAGATGTCAGTTATCGAGGTCTATGACCAGTCTCGGGCGGATAACAAAGATATTTGGAAGTTTGTTCTTGGGAAGCATAATCTTAC(A/G)TCGCCCATCTCTTCTTATTATCGGCCAGAAATCTCAGCAAAATCACAATCATACTTCTTTACTCACTCTGTGAAAGCCATTGAAGTGACTTCAACTGCTAAGGGTATAACCTCTAAGCAGCTTCTTATTGGAACAATTGGTGATCAGGTT
Unigene0043251	2396	G	*	A	CATTAACAAAAATGAATTATAGCATGTCTTTTCCATGGTGTGGATGTGAATGCACTATTATTGACTCTACAAGGTATAACTTTTGTCCCACTGGTTTTCTAACTGATTTTATATTTTACACACCCTTAATAGACCGTAGTCATTGGTTGT(A/G)TGCTTGCTTTCACCGAGACTCTAGTAGAGGACTTTCTTCGGCAGATGAGGATGATGATGATCCATTAACTTCTAGGCCATTCACATTTCCCTCTTTTGATTGTGCCCACATAACTGTGTAAATCCCAATGGCGATTACCACTGCTCCCAT
Unigene0043252	298	G	*	A	TCAATTCTCTCAAACTCAATTCTACCAAATGCAGATCGAAACACACGTCTATTTCTTTAATTTATTCATTCAACTCCACTCCCTAAATTGGTATTGTTGCTCCACAGCTGAAGTAACAAGACGGGAATAAATGGTAAACAAGACTGTTAT(A/G)TTTCCTTTTATAACACAAAATGGTTTCCAGGATTCTCCTAGAGGTTGATGATAAAAAACCCATAATCTGCCTCCCAAATTTCCCCTTGCAAATGATTGCCAATTAACAAGGTGCATCGCAGATGGTGGAAAATTCCAAATCATTCATTTG
Unigene0043324	751	G	*	A	GGAAGCTTTAGGATCTGAAACAACAAAAGGAATTGGATGGAATAGATTGGTTGGGAAATTTTGTTTCGCATTTCCTTGTCCTAGAGTGAGTTCTTCCATTGGACTCTCATCAACACCCAAATGATATACTGACATAAAAGGAAATCCATT(A/G)CTTTTTCTAGTTTCAGGTGCTGCAGCGCACATGGGCTGTACTTGTGAAACACTGTCTTGAGTCTTGACATGTTCTTCCTCCATTGGAATTGCAGAGACCGAATCGGTGGTGATATCAAAGAGACTAGATCTACGGCGACGGCGATTGAGG
Unigene0043413	116	G	*	A	NNNNNNNNNNNNNNNNNNNNNNNNNNNNNNNNNNNGAAATAGTGTGATTGCTCAGAGTGTAATTAGTACTCTGAGTAACTAACTAGTTTAGCTCCAAAATACAGTAAGATCCAAACACATTTCTTCATTCGTCTCAGATATGCTGAATTC(A/G)TGAACTAGTTAGATCCACAAATTGAACTATGAAATCTCCAATCAATCTCGATTTTCTCAAATCAACCCACGCTCTCAAGATCGCCATTTTTTTCTTCATTTCCATCACTTTCTTCTACTTAGGAAAACACTGGTCCGATGGCTACCAACA
Unigene0043413	1038	G	*	A	TAAGTTTAAATTTCCAGGAGGTGGTACACAATTTATACACGGGGCAAATGAATACTTGGATCATATTTCTAAGATGATTCCTGAAATTACATTTGGTCGGCATATACGAGTTGCTCTTGATGTTGGTTGTGGTGTAGCTAGTTTTGGTGC(A/G)TACTTACTGCAACGGAATGTCGTCACTGTGTCTGTAGCTCCCAAGGATGTTCATGAGAATCAGATTCAGTTTGCTCTTGAGCGTGGGGTGCCCGCCATGGTGGCAGCATTTGCAACTAGGCGTTTATTATATCCAAGTCAAGCTTTTGAC
Unigene0043420	330	G	*	A	TGATTTTGACGGAGAACAAGAATCTTTGGTTTATGTCTCTTCTCCAACTAACATTCATTCAAGGATTGTGACTGTGAGTGAGTCAGTGAGAAAAATGGCTTCAAGGTCATATTCCAATTTGTTAGATCTTACTTCATGTGGTTCGCCGTC(A/G)TCTTTCAGTCGGGAGAAGAGAAGGCTTCCTAGAGTTGCAACTGTGGCTGGAGTGTTGTCTGAATTAGATGATGAAACAAACAACAGTGTTGGCTCTGATGCTCCTTCTTCTGTTTCTCAAGAAAGGATGATTATTGTTGGTAACCAGCTT
Unigene0043438	64	T	*	A	NNNNNNNNNNNNNNNNNNNNNNNNNNNNNNNNNNNNNNNNNNNNNNNNNNNNNNNNNNNNNNNNNNNNNNNNNNNNNNNNNNNNNNNTTAAATTCACATACAAAACAATTAAACATTATATAGAGCACTTGTGTTCAAAAACATTAAAAC(A/T)AGGGTGTGCCACATAAATATCATAAAGCCTGATGTTCAGAAAAACTAGGCTCAAACATCATCAACGAGCAGAAGAAAAAAAATACAACAGAATTACAAAAGCAGATACTCTGCAATAACAAACAATTTATGGTTAATCATACTTTTGACC
Unigene0043438	698	G	*	A	AGCCTTCATCACACCAACTGCTTTATTTCTTCCATAATGAGGAATGTTTGGTGCACAATGGAAAAGCTCTCCGATTCCATGACCACAATATGATTTTACCACTGAGAAGCCTGACATTGAAGCATGACGATTAATAACTTCGCCAACTTC(A/G)CGGAATCGTACCCCAGGTTTAACAATGGATATTGCCTTATCCAGGCACTCATATGTGCATTTGACTAACTGACGGGACTCTTCATCCATATTTCCCACAAAGTACGTTTCATTGAGATCACCATGAACACCTTTATAGTACACAGTGACA
Unigene0043455	1398	G	*	A	AATTCTCTCGGACGGAACTGCTGTAGCTGTCAAGAGGCTTAAAGATGGAAATGCAATTGGAGGAGAGATTCAATTTCAGACTGAAGTTGAAATGATTAGCCTCGCGGTACATAGAAATCTGCTTCGACTTTATGGATTTTGCATGACATC(A/G)TCCGAACGGCTTTTGGTTTATCCTTACATGTGCAACGGAAGTGTTGCGTCTCGTTTGAAGGGTAAACCCGTCTTGGATTGGGGAACAAGGAAGAACATTGCATTAGGAGCAGCAAGGGGACTACTATACCTTCATGAACAATGTGATCCA
Unigene0043469	237	G	*	A	GTTATCTCTACCGTTAAATCCTGCCCTCCGTCAGACCGGGCAGCACTCTTAGCCTTCAAAGCTGCCCTGACGGAACCCAACTTAGGCATCTTCAACACCTGGTCAGGCTATGACTGCTGCCGCGGCTGGCACGGCGTCAGCTGCAACCCC(A/G)CCACCTGGCGCGTTACCGACATTAACCTCCGCGGCGACTCCGAAGATCCAATCTTCCAGAATGTTACTCACTCCAGCAGCATGACGGGAATCATCTCGCCGGAGATTTGTAAACTTGACGAGCTCACCACCATAGTCATCGCAGACTGGA
Unigene0043596	672	G	*	A	ATGAAATTGACAACCCTTGTAACCAATAGGAAGTCCTGCTTTCCTGTACTCCCCCGTGCAGAACTGCCTGAAATTTTCGGCGGTTTTGGGGACAATATCAGCGAAGAGTTCCATTTTGATTCTACCGGCAGGTATGTTACCGATGGTGAC(A/G)TCGAAGAAGACGATTGGGTTTTTAGGGTTTGGAGGACGAACGTGCCACTCCACACTATTGCCTCCTAATGAAGCTGCCATTGAAATTGAAATGAAATCGCTCACTCCTCGCTTGCAAGCAACGCAAAACACAGCACAATGCAATGCTTCC
Unigene0043612	652	G	*	A	CGGTATTTAATAAAACTTGCGGTGATGTGGTCCCTACTAATGTGACTTACCGTCACCGTTACGGTTCTTTCCTTCGGTGACAGACGCAAGCTTCTGAAGATTAAGCTTCACAACGGTATCAGCAAAAAGACGCGTATCCTCTTCGGTGTT(A/G)CCTTCAGGAACATCAACTATATAAGATTCCAGAACAACCGTCCGGATCTCGCCGTCACCGTCATCAAAACCGTGGACGGAGGTAACAGAACGGTAGTTTCTTAAGCGATGTTCGCCGCCGGTGATACTGAATCCGGTGACACGGCGTTCG
Unigene0043612	1073	T	*	A	AAGTGTTTGTAGATTTGTGGTTTGTCGAAGCTGCGTACGACGGACCAGACGGTTTCAGGAGGCGCGTGGATTCGTTGAGCGAGCAAGGTGGAGCATTGGCCGGGACCTATGAGGTAGGTGTGGTGTTCAGCGACGAAAGGGATGAGTGAG(A/T)CAAACTCGTGTTGAGTTAGACCTGATGGAACTGTTAGGTGGTGTTGTGTGCGGTGCTTTTCGTCGGAGTCTTGGTCGGAGGTGGAGGCGGAGGCGGTGGAGCTCTCTGCTTTCTCCATCGTGAAGTGAGAGAAAGAGAGAGAGAGAGTGC
Unigene0043640	890	G	*	A	TTGGGACAAAAGTGGAATCGCGTGTTCAGCAGGCAGAGGCTAATAGGATGCTTATCCTTAAGGCTCACAGGCAAAGAAGGGCTTCTCTTAGAGAAAGGTCATCTCAGTCATTGATGAGGAGAATGACTCGAGAGAGCAAATATAAGGAGC(A/G)TGTGCGTGCTGCAATTCACCAAAAACGAGCTGCTGCTGAAACAAAACGACTCCGGTTGCTTGAAACTGAGAAGAAGAGGGCGCACGCACAAGTCTTGCAGGCAAGACATGTGGCAAAGTCTGTAACTCACCAGCGTGAGATTGAGAGAAG
Unigene0043676	1161	G	*	A	GTTTGTGCCACTGTTTCCAATTGAAACACCGAATGCCCCGCTTCCAGATCCCAAGAACGCACCGGGGCTAACCGGGTTATTAGCACTGCTCAGTCCCCCATTACCCCAGACATTCCTAGAAGTCGAGTTCATAAGAGAATCGCCTCTTCC(A/G)TTACCTCCATTATAGCCTATCGGAGTAGCATATCTGCTTGAGTTGCCACTATAGAAAGGACTAAATATTCGACCGTACCCCAAATTGTTCCCAAAATTAGAGTTCCCTCCAAAGTTTGGGCTCAATCCAGAATCCAAATTCATCCCCATT
Unigene0043748	1826	G	*	A	TGAAGATTGGATGAGAGCAACGGAGTCAATTTATAAAGATAAATTCCGTGGTTGGGTTGGATTTAATGTTCCAGTATCTCATAGAATAACTGCAGGCTGTGATATACTGTTAATGCCATCAACATTCGAGCCATGTGGACTAAATCAGTT(A/G)TATGCAATGAGATATGGAACTATACCAGTGGTTCATGAAACCGGGGGACTAAGAGATACAGTTCAAAATTTTAATCCATTTGCTGTAGGAAGCAATGCCGAAGGATGCAATGCTGAAGGCACAGGGTGGACATTTACTCCGTTGACAAAG
Unigene0043776	76	G	*	A	NNNNNNNNNNNNNNNNNNNNNNNNNNNNNNNNNNNNNNNNNNNNNNNNNNNNNNNNNNNNNNNNNNNNNNNNNNNTTTTTTTTTAAATAAATTATGAATTGATTAAAAGAACATGAATTTGTTGTATATAACATGTGGGTACATACATAC(A/G)CAATTTTGTAATTGTACATATGAATGATTTCCCTCATAAGAACAACTAAGATTATTTCCCTAATAACTGTTCAAAAAGATTAATAAATAACCCTTGAAATTTAAGCTTCAAAGTCCACCATTAATTTGTTCAACTTCTTGTTGCTTATTT
Unigene0043783	893	C	*	A	GTTTACATGGTGACCATTACCCCCAGAATTACTATTATATCCAACTACAGAGCGCTGAGCAAAATCAAGTAATATTTTCTTCTGGCGATCATCAGTGTGAGGTAGACTTGCGCGCAAAAGCTCAACGGGCATTTCCCTACTTATAGCTCT(A/C)GCAACATCAGGCGCAATGACCGCCATATTTGATGTCCCTTGAGTGAGAAATGAATGCATGATGCTGTCGTACTTATTGACACAATACTTAGTGAGAAGACCAAAGAATTCATCAAATGAAGCCTGCCAAAGTGAACGATTTCTAATGTTA
Unigene0043793	199	G	*	A	TGTGATTTGGCCATTCCCTTCTTCCTGTATCACTTTAGCATTTTCTACAGTGCGCCCCGTTTCTTATCCTTCACCACCATTCTTCAATCTCCATCACTACGCTAATCCACCTTCATTCTTCACCTCTTCGATCTCAAAAACAACTCAACC(A/G)CTTTATGGATTTGTGCTCTGAACAACGTTCTTGATCGTGAAGAAAGCTCGTTACGGATCTGCACTGAAAACTTCATCCCTGTTCCAATCCAATGGCTGGAAGTAACCAACTCAACCCTAGCGATTCAAAGATGGTGGTTCCGTTGAACAT
Unigene0043794	41	G	*	A	NNNNNNNNNNNNNNNNNNNNNNNNNNNNNNNNNNNNNNNNNNNNNNNNNNNNNNNNNNNNNNNNNNNNNNNNNNNNNNNNNNNNNNNNNNNNNNNNNNNNNNNNNNNNNNCAGAGAAGTTCAAAGCCAAACCCAATCGAATGGGATGTGT(A/G)GGAGCTAACTCATCTTCGGCTGCAGTAGAAGCTGTCTGATAAGCTTCCATGGAACGATCAGCAGCCTCTTTCCTCTCGTCACCGTTCTTAAACTCCGCCAAATACCGATAATAATCCCCTTTCATTTTATAGAAAAAGACACTAGACTCA
Unigene0043822	543	G	*	A	GGGTGTACCACAAGCTTCTTCAGATGGAGTAAACAGAATAACAGATGCAGTTTCTGAATTAGATATTGATGCAAATGTTGATTCAAAAAGACCACCTACTGCAGATAATAAGCTTGTGCCGGGTGTTAAAGAGTGTAAGTGTGGAATGCC(A/G)CTTTGTATTTGTGAAGCTCCTGCCACTTCCTCTGATGCACTCCCCCAGGAGAAGAAATCCACCCCAGTTGTTACAGCTCCATCAAATCCTAAACCCAAGAAGACAGATAATGTTTCCAAAAATAGAAGTTCCACTTCCACGAACAAGTTT
Unigene0043855	230	C	*	A	CACTGTTATCTTCTTCGTGACTCTCTCCCGTTTTTTCACTCTCAATTTGAAATCGCTAACAAATATACATAAAAGGTAAAGCTTTCAATTTTCCAAGAGGAGCAATTATTAAAGAAGCTTTTGAAAGGAGAGAGAAATAGGGTTTTCGGT(A/C)TTCCAAAATGAAGACGACGAAGGGTGGTAAGGTTATGAACCCTACCGATGCTTATCGGAAGGAGATTCGCAAGAAGGAATTGAAAAGGAATAAGAAAGAAAGAAAGAAGGTGAGGGAGGTGGGGATCTTGAAGAAGGATCCTGATCAGCT
Unigene0043935	673	C	*	A	AGATTTAACCGATTACTTGTGGTACTCCACAGATGTTGTAATTGATCCTAATGAAGGATTTTTGAGGAGCGGAAACGATCCTGTTCTTACGGTGTTATCTGCTGGGCATGCTATGCATGTTTTCGTCAACGGTCAGATGTCAGGAACTAT(A/C)TATGGAAGCTTGGAATTCCCCAAGCTAACATTTAGCCAGAGTGTGAAGCTCAGACCTGGTGTCAACAAAATCTCTCTTCTAAGTGTTGCAGTTGGACTCCCGAACGTTGGCCCTCATTTCGAAACATGGAATGCTGGTGTTCTCGGCCCG
Unigene0043963	174	C	*	A	TTCAGTAACAGTCGCCTACGTTTCTTTCCTTCCTTCCTCGTACACGCACTCTACACGTTTCTCTCTCTAATTTCCCAAATTACCATTTTTGAACCATTAAACTTATTACTCTACTTAATTTCAACCCTTTTTCATTCCATTCAATTTTCG(A/C)TTCGATCTAATCAATGGGTGCCGCAGATGAAGAATACGATTACTTGTTCAAGTTGGTTTTGATCGGTGATTCTGGTGTTGGTAAGTCCAATCTACTCTCTAGATTCACCAGAAATGAATTCAACTTGGAATCCAAATCTACTATTGGTGT
Unigene0043971	889	G	*	A	CTTTTCAACCTTCCCTCCACCAACATCCAACGCATTCGAAGCATGAATCAAATCAAACACATTGTCGTAAAACGGAAACCTATGATCTAAGCTCAAGTAAATCGGAAAAAGTCCTCTTGCAGCAATGAATTCACTAAATGGTGCATCAAC(A/G)TTAAGAGTATTTGTAATCACAGTAACATTTCTATCAAACATTCTAGCAGCAAAAGAACCAGAACCACCACCAATATCAAACCCTACTCTAATTCCACCATTTCCTAAACCTAAAACATCATCAATCAAAAAATCATTTTTACTCTTACCC
Unigene0043971	1300	G	*	A	ACTCCAATTAAAAGTGTTATTACCTAAAGGCTTCCAAAGAGAAACAGGAAAAGGAAAAAACCCTAATTTTGAAACAGTTTTGGAAAAACACCTTCTTCTTGGTAATGGCTCACACCCTCTTAAGATCAGTTTCTGAGCTAAACTCCAATC(A/G)TCAGGACAAGTTCCAGAAAGCTTGTAACTCATGAACTGAGACAACAAGTCTGAATTTTTCTCACAAGAATGACCAACAGATGAAACCATTTCAGTGATCCCAGTTCTTGAATCTTTACCTAGAGGAAGTTGATGGCGTTGGAGGAAGATT
Unigene0043997	47	T	*	A	NNNNNNNNNNNNNNNNNNNNNNNNNNNNNNNNNNNNNNNNNNNNNNNNNNNNNNNNNNNNNNNNNNNNNNNNNNNNNNNNNNNNNNNNNNNNNNNNNNNNNNNNTGAATATTTCTTTTAATCAAAGCTCAAATGGCCACGTTTATACTTC(A/T)CAAATTTTAAAAAATAAATATCTATATTGCCAAAAAAATAAACTATGTATTTAAATTAAACACACTCTTTTATTGTAATATGAATGGTTTTTACTAGTATATAACTAATTTGAAAATTTTGATCTCACAACTGACATGACTTAATTCCAC
Unigene0044089	1185	G	*	A	ACGGTAGGTTTGAATAGAGACAATTGTGTTGGGGAATAGTTTATTCTCACACTTTCTTAATAATCTTCTTTTTCCCAAATCATACAACCTGAGAACAGGTCCTATTCCTGCAAGTAATCTTCCCTGAAACTGACTTAGAGCAAGCGGAAC(A/G)CCTTCAACTTGAGTTTTGTGAAGTAGTTCGAGAGACCTTCCATCCTCTAGAAACCTATATATGTGAATAAATCCAGCAGCTAAACTCCTTTTGGGCGTAAACTGCAGCCCCTTTGCTGTGCCAACAGCTAAAAGGGTTCCATATTCTTTA
Unigene0044089	3699	G	*	A	TAAAGGAGAAGAAATAGTTAACCTAGCAGCAGTATCTCTATTCAACACATAAACAAGCTTCTGCTTCTCACAAGCACCAATCATAACAGCTCTACCTTTGGGATCTACAGCGATATACTGACCTGGAACAATTCTCCGGCAACCAGATTT(A/G)CCAAATGTTTCTTGATGAATTTTATCAAAAACATTTTTCTCCTTGTTATAATCTAGAATAACGATTCGACCGGAATCGGAACCAACAACAATAAAATCCTTCTGAGCACCAGTGAGACGGAACTGAGCTAACGACCTAATGGCGCCGAAG
Unigene0044116	819	G	*	A	CTGGCTCTCAACCCTGCTTGCAACATCAGCTGACTTGCTGACAATGTTCAAGGCACCAACACGTTCACCATAAAGACCCATGTTCTTTGCATAACTCTGAGCTGCCAGCAATTCACCACCATCAGCAACAAACAAACGAATAGGCTGTGC(A/G)TCTGCATCTAGACTTCCACTGGCAAAACCCTGATAAGCACTGTCAAAGAAAGGTAACAGAGATTTTGATCTTATGAGCTGTCTAATCTGCTCCCACTGTTCAAGCGTTGGATCAACACCAGTAGGGTTGTGTGCACATGCATGTAGCAAA
Unigene0044144	2053	C	*	A	TTGTAAACAATTTTCAAGCGGAACTTGCCCAGCAGGTTGGTTGTCTTTGCAACACTGTTGCAACATCGTTGTCTGAACAGAATGGACATTTACAAGGTGTGGAGAAGCTCTGTTATTCCTTTTTGGGCATTCATGATAAGGCGGTTATTG(A/C)TTTGAAAGAGAAAGTGAAAGACTTGAGGGCAGTGTATGTGTCTCATATGGAGGCAGTGCAAAATGTTGTGCGTTTGCATAGGTCAGGCTCGGACGCATCCTTGGAGGAGTTGTCATCTGCCATATCTTCCCACGGTCGTTCAATTGAAGA
Unigene0044244	2178	C	*	A	CTTCCGAAGGAGTTGAACCAGAGCAACGAACCCTCGAGTTAAGTCTCGCGCGCTCCATCTTTTGATTAACCTAAAACAATATTAGTGTTAGTGATCGGTTGAGGAGCGGAGAGGAAAGTGCAAGAGGTTCATTGATATACAGAGTTCATT(A/C)GGATGTTTTGAAGTTTGGATTTTCAATCTGATGAAGGAAAGGCAAAGTTGCATAGAAATGTGGTAAAGTAAAGTCAGCTCAGTGTCTCTTCGTATTGTGCTTGGGTGTCGNNNNNNNNNNNNNNNNNNNNNNNNNNNNNNNNNNNNNNNN
Unigene0044271	2406	G	*	A	ACCATTGAAGAGCTTTTCTAGCATTGAGTCTATGGAAGAGGAAATCAGTGAAGTTGTAACATTTTTGCGAAATCCAAGGGCATTTCAAGAAATGGGAGCGCGGGCACCTCGGGGTGTACTTATTGTAGGTGAGAGGGGTACTGGCAAGAC(A/G)TCTCTAGCATTGGCTATAGCTGCTGAGGCTAAGGTGCCTGTTGTTAAAATTAAGGCCCGGCAATTGGAGGCTGGAATGTGGGTTGGACAAAGTGCATCCAATGTTCGCGAATTGTTTCAAACAGCTAGAGATTTGGCTCCTGTAATATTG
Unigene0044331	841	G	*	A	TGATGTGCATTTATCGTCCTTAGAAACTAGCGCGCGGCATGAGACAGAATACTTCACAGCTATTAGTCTTTTTGGTTTCGTTTTTTGTAATTGAGATCAACCAGTAATCATCATTGATCCATGCCCCTAAAGTTGTTGCATTTGGATTGT(A/G)TTAATGCATTTGAAAGCATGTTGTATGGTTTTAGATTCTTGTTCACAGCTAGTGTTATATTGCATAATATAAATTAAATTTGCACAANNNNNNNNNNNNNNNNNNNNNNNNNNNNNNNNNNNNNNNNNNNNNNNNNNNNNNNNNNNNNNN
Unigene0044396	517	G	*	A	GCCTCTCCCTCCGGCTCCATCTAGTTTCAATCCACTTAAATCATCAGTGCAGCTACCTCAAAACCCTTCTAATGATAGTGATACTAATCTTCAAAACGCTAAAGCGTCTTTGGTTGCTACGAATCCGGAATTAGAGAAAGTTAGTCCTTT(A/G)TCCATTGTTAGATCAATGGTGGCTGTTTGTCTTTTAGGTCGAGTGCCTTTTTCGCCGATTGATTCTTCAACTGTGTTGAGGAAATTGGAGAATGATCAGACGGTTACGCCACAAGAGAAAGCTGCACTTCAGGAGCTTGGTGGAGATTTG
Unigene0044416	114	C	*	A	NNNNNNNNNNNNNNNNNNNNNNNNNNNNNNNNNNNNNAACAAAACAAAACAAAAAAATAGATTTGGAAAAATTGAAATACATGGTTTGAAACCCTAACTAATTTCCTCTCGGCAAGTCCCCGCGATTGTCCCTGACCGGACTCACCCACT(A/C)TTTTTCACGCCGGCCACCGGGAAACGGTGATCCCGTCTGTTGCTCTCACCTGTCAGACGCTTTCGCTCTCAGTCTCAGTCTCAAGCTTTCAATTTCAGGTGGGTGGGGAAACAACAACAGTTCTTCCGAAGGAACAAGAGAGAAGTTGCT
Unigene0044447	3079	G	*	A	GAATGCTTCCTTACACTTCCTCATATCATTATCTAGCTCCTCTTGTCTTTTCATATAGTTGTTGTGCTTAGTTTCAAGTTCTTTCAGGGATTGTTTACTTTCTTGGATTTTATCCCTTTCCGACTTAAGATTTTCTTCTAGGCTAGCGAC(A/G)CCGACTTGTAACTCATCCATTTTTCCACTAGTATCATCAACAGCTAACTTTGTGGCCTTCTCTTGCCACTTCAACAGAGATAACTCTTTAAGCATGTATGCTTCTGCTTCATTCTTCACATCCTCCAAGCTGTCTCTTTCTTTTTCAGAT
Unigene0044456	62	G	*	A	NNNNNNNNNNNNNNNNNNNNNNNNNNNNNNNNNNNNNNNNNNNNNNNNNNNNNNNNNNNNNNNNNNNNNNNNNNNNNNNNNNNNNNNNNGCATCTTCTAATGCATTCATAATGCAGACACTCAACGCATATGCAAGTCAAAATATGGTTA(A/G)AGTATAGCTTGTATTCACAAATAGAACAATTAACCTCTAAACAAATCACAATTGTATAAGGATATCCAAATAACCAAAGATTCAACAAAGAAAAAACAACTTAATTTTTTCACTCCATTTGTAATATTTGCAATTTTATCTAGTATGACA
Unigene0044456	299	T	*	A	AAAGAAAAAACAACTTAATTTTTTCACTCCATTTGTAATATTTGCAATTTTATCTAGTATGACACAAAACATGTATTTGGATCATACCCTTACTTTCTGAGCAGCTTCCTTGATCTGCTCAATTGTAAAAACACCAAAGAAGTCGTCATC(A/T)GTGACACCGTTGATAACTGCCAACGCGACATCGTCAACACTAACCGGTGGAGCCAAAAGTAGATCAGAAGCAGGGAGTGAGCTTAATGGTTTTGTGAAGTTCTCTATTGCTTTTAGAATTCTTTCAGCTGGCTCCCCTACTAAATCCAAA
Unigene0044486	119	G	*	A	NNNNNNNNNNNNNNNNNNNNNNNNNNNNNNNNGCTGCAGAAGAATTCACCTGATTCATTGGAAACACATTTGCTCTCTTTTGAATTATATACAAGAAAACGGAAGATTTTGCTTGCCTTTCAGGCTGTAAAGCAGTTACTGAGATTGGAT(A/G)CTGATCACCCTGATTCTCATCGTTGCTTGATTAAATTTTTCCATCAATTCGGATCCATGGGTTCTCCTATGACTGAAAGCGAGAAACTGATATGGAGTGTCTTAGAAGCTGAGCGCCCAACTATTAGTCAGCTGCATGAGAAATCTCTTT
Unigene0044494	199	G	*	A	TTTAGAGCAGCTTACAAGTCACTTCCTATTACTATCAATTACTTTTACATACTCATGAAACAACGTTCAATTAACACCTCTCTCTCACTAGAGAAAGAAAAAAAATCAATACACAACTTCAACAGCAGTGCAATGCATATTAGAAATCTT(A/G)TCTGACAAATCCACCGTTAACATTGATGCCTTTACCTTCTGCTTTGGACTAACCGCCTGAGAATATTCCATTGAAAGTGAATTTGTTGAAGTGTTCCTTTTACATGGACCCAACCACTTAGCTTGCATGTATTTATGTTTTCTCCATGGT
Unigene0044494	559	G	*	A	TATGTTTCTTAATCTCTCTACTTTTCCTACATACACTTCTGGGATTTTTCTCACAAGATTGTTATAATCTTCACTTGCTTTTCCCATCTCAAATTGTGACCGAAAGTTTAGTTCTATGATTACCCTAACATCTGGTTTCTGTTTGCTTGT(A/G)CTGTGTATCACATCCAAAAATGTATGTTCACCTGATGGAAGATTATGTGAGCTAGTCCATTTAGTATTACAAATGGCACTATTGAAACCAGCATTTTGAAGGCACCTTGAAACTTGTCTCATGAAACAGTTTCTACATTCTCTTGCTGAT
Unigene0044494	562	G	*	A	GTTTCTTAATCTCTCTACTTTTCCTACATACACTTCTGGGATTTTTCTCACAAGATTGTTATAATCTTCACTTGCTTTTCCCATCTCAAATTGTGACCGAAAGTTTAGTTCTATGATTACCCTAACATCTGGTTTCTGTTTGCTTGTGCT(A/G)TGTATCACATCCAAAAATGTATGTTCACCTGATGGAAGATTATGTGAGCTAGTCCATTTAGTATTACAAATGGCACTATTGAAACCAGCATTTTGAAGGCACCTTGAAACTTGTCTCATGAAACAGTTTCTACATTCTCTTGCTGATGAG
Unigene0044577	951	C	*	A	CACTAAAACTCCCAACGCCCACCAGTCAGCGGGGAAACTGTGGCCTTTTCCCAAAACAATCTCTGGAGCTAGCGAATCTGCCATCCCACAAATTGTGAATGTTCTCTCATCAGATAGCTTCTTTCCAAATCTGAAGTCTACCAGCTGTAT(A/C)TGTCCTGTTTGATCCAACATCAAAACATCAGATGAAACACCTCTATAGAGAACACCATTCTTGTGCAAGTCTTCTAAGGCAGTAACAACAGAAGCCGCGCAAAATTGGGCTGCTGATTCGCTAAAAGGACTTGAAAGTATGGAAGACAAA
Unigene0044642	897	G	*	A	GGTAGCTATGTTGTCTAGAGTGCAACATAAGAACTTGGTGAAGTTTATCGGTGCCTGCAAAGAGCCAGTAATGGTGATAGTCACTGAGCTGTTATCAGGTGGAACGCTGCGCAAGTATTTGCTTAACATGCGTCCTAAATGTTTGGATAC(A/G)CATGTTGCCATTGGTTTTTCACTCGATATTGCACGCGCTATGGAGTGCCTGCATTCTCACGGGATCATACACCGTGATCTTAAACCTGATAACTTGCTATTGACGGAAGACCATGGAACAGTCAAGCTAGCAGATTTTGGTTTAGCAAGA
Unigene0044661	1032	G	*	A	ATCTTCAAAGGGGCCATAAAATGTGTTCCGCTCATTGTACTGTTGATTAATGGAAACCAATGCAGGAATCTTATCAAAGTCATATGTTATCATGAGATCCTCTGAAAAATCCTTTGCAACAGAAAACCATGCGTTTTTCTTATACTTTAC(A/G)CCTAATTTTTCTATAACCGAACTGTCCAACCCAAAACCAATAAATACCGGGAAAAAAGTACCAGCTTCTTCAACAAAACTATTCACAGCAGAATCTGAGTCGAGAACAGAAACATCAGAAGCAGCAAATTTCTTAAGATAACGAACAAGT
Unigene0044702	1966	G	*	A	GGGAATCACTGCTTGCAAGGGTGGGATTAATAGGTGTTGTTTACCTCAAAACTTTGCCACCTAAAAGTTCTGGCGGTGATAAAGAAACTGAATTCTCATTCCGAATTGAGGGAACCAAAGCTGTTAAGAGATTTGCTTTGCAGAGTTCTC(A/G)TGTTAGTAGCCTTGAAAATGGAATGTTTCATGTGAGGACAGCGGCTTCAGAGGAGCCTATACCCATTATGAAATTTAGTTTGCTTCCAAAGTTTACACCTTTACCTTTGAGAGTTCGACTTATAAAACGACACACAGGGAGTTTCATTTC
Unigene0044729	292	G	*	A	CCAATAATCACTTTTTTCGCACAATTGATTCTCCTCCTCTTACACCATCATGTGCAACACTCTCATCCATTAAGAGAGAGAAACTCAATACGACATGGAGTCTTCCTATCGCCGCCGACACCGTACATGGTGTTGCTCTTTCGCGGTTCC(A/G)CCGTCAAGCCCAGATAACCCACCGTTCAAACCGCGCAGGCCCAAGCCCGAGGCCCAATCCAAGCCCGCTTTCTCCTCCTCCGTACCGAACTCCCCTCAGAGTTCCAAATCCAGCTCCCGCATTGTCGCTCGGATCGACCCTCGCCGGATC
Unigene0044803	642	G	*	A	CCGACGTCCTCCTCTGCCATGCCCACGGCCCCCTCTACCACGTCCACGACCACCACCGCGACCACGACCACGGCCGTTAAACCCTGATCCCTGGGGCTTCAGCCCCAATGATTGAACTCCCCTCTTTTTCCGGGGTTCCACTTTAACTCC(A/G)TCATCTTCGTTGTAGGATGCTTTGTTTCTTGAAGTGAAGGTTATTTCCCGTGATCCTCCAGGACCCTGCTTAACACCGCGTGGAATGTTAGAGGTTCTTCTGTCATCTTTGAGAGCTGCCACTCTATCTCCCATAGGAAGTGATTCCTCA
Unigene0044803	651	G	*	A	TCCTCTGCCATGCCCACGGCCCCCTCTACCACGTCCACGACCACCACCGCGACCACGACCACGGCCGTTAAACCCTGATCCCTGGGGCTTCAGCCCCAATGATTGAACTCCCCTCTTTTTCCGGGGTTCCACTTTAACTCCGTCATCTTC(A/G)TTGTAGGATGCTTTGTTTCTTGAAGTGAAGGTTATTTCCCGTGATCCTCCAGGACCCTGCTTAACACCGCGTGGAATGTTAGAGGTTCTTCTGTCATCTTTGAGAGCTGCCACTCTATCTCCCATAGGAAGTGATTCCTCAGCTGCAAGT
Unigene0044803	2582	C	*	A	CATTTTGAGTATAACTTTTGACAGGGCGGTGAGATTGCTGCTTCTTGGTTGGAACCCATGAAGCAAGTGAGGGTTGCTGCGAAGCGATTGTATACATTTTAACACCGTTAATAGATGACGACTTGATACCGCCATCGCGAGTCGCCATGG(A/C)TGCTGCCGGAGAAGATTCAACGGCGGTGAGTGGCGGCGTTCGGTTTTTAAGGGCGTAGGTGTGAGTGAGAGATGAATGATTTCTGTCTGATAATTATTAGGGCCGGTTGGTTAAACTTTGTTCGTCTGGGTTACCACTGACNNNNNNNNN
Unigene0044857	1116	G	*	A	CGAGAAAAGAATCTCACCATCTCTTCTGTATGGGCGGTTATAAAATGATATTAAACCTGGTTTTCCATCACTCCCTGATAATTGAAAAGATGGGTTGCTAGCAGGAGAGATATCTTGAGCAATATCATCGTTGTTTTCTGGCACTGAAGC(A/G)TCTATTTTAAGCTCATTGTATTGTGACTGATCCTCGGAGACAACAAAAGGAGCATTTTGTTGTTTCTGGAACCTCCCTTTTAACTGCAGCCTTTCGTTCGTAACTTTATACTGGCGCGATTTGTCTAACCATGATACTTTAGTGTATATC
Unigene0044862	73	C	*	A	NNNNNNNNNNNNNNNNNNNNNNNNNNNNNNNNNNNNNNNNNNNNNNNNNNNNNNNNNNNNNNNNNNNNNNNNNNNNNNGTCAATAAACATCCCACTCGATGCCTTAGATATTAAAAAGAATATTTTGACATTCATTACAATTAATAGGAT(A/C)ATCAATTTATAGTACAACGATACTGCACTAAGCCACTACTATATTGTACAACAATAACAACAATCAAGTCTCATTCTATTAAATGTCGGTTACATAGATCAAATTTTGTTGTAATGTTCTGTTCACACTATGTCATTGAGATTCAACACA
Unigene0044862	478	G	*	A	ATCCTTTGAAGCCAGGGCAGTTTTTGATCCGTACTTGGAGAAAACACCACTCAATACAGCCTTTTCCTTGATCTTTAACCTTTTCGCAGATACAGGAACATCTAAAACCTTTTTTGCATTCTCTTTTGTACTTGGTTTTTGCTTAGGGGC(A/G)TTCTTTTGTCCAACTTTGACAGATGCTTTCTTCTTTCCATCAACCTGCTTTGAGGGAAGTGAATTGATTTCAGAATTATTTGCCATTTCTACTCTGTCATCACTATCCAAATTCAAAGCAGTCACAAACTCTTCATTCTCCCCATCACTT
Unigene0044867	674	G	*	A	GCTGGGTCAATAAGTTGCTGGCCAAGGCCAATTTTCTTTATGACTGTCTTCTAAGAGTTGCTACTCTGGTTTATTGTATTTGGTCTATGTATTTGCTGACAGATAAACTTTTTAAGATTCAAATATATGAGATGAGATTCATCATTTCCT(A/G)CCATGTTTTTCCCATACAAACGAGGTATGTGTCTATATGTAGATCACTACCTAGTTGGCCATATTTTCTTAACCTATATGCAGCTTGTTTTAGATATGATGATAATGTGACATATTNNNNNNNNNNNNNNNNNNNNNNNNNNNNNNNNNN
Unigene0044873	535	G	*	A	ACCCATAGGAATTCCAAGCTCTTTGAGGTCATTTTCTCCCATCTGCTTCAACGCGGTCATATCCACTTCCTCGGCCTTGAAGAGTATGACATATTTTTGTAGTCCCAATGCTTGCAACAGGCCATCAACAGTTTGTGGTTGCTGTTCCTC(A/G)CCCACAAATGGAACCCTTTGTGCAACGCTGCTTGATGGAGGATGCTGACCAGGACGAGATGCTACAGGTTTGGCAGTTACTGGAGGCAATGACGATATTGCGGATCTTGACATAAAAGATGAAGGTGCAGCAGCACTTGGAGGCCTTGAA
Unigene0044906	1408	C	*	A	AGAGCTGCGGAAGCAGCACTTAAATTATTAAATAGGAGTGATATAGCTGGTAAACGCATAAAGCTTGAACCAAGTCGGCCTGGAGGAGCTCGTCGCAATTTGATGCTCCAACTTAATCAAGAGCTTGACCAAGACGAGTCTCGAAGTCTT(A/C)GATATCAAGTGGGTTCGCCTCTAGCCAACTCTCCACCAGGTAATTGGTTACAGTTCAACAGCCCTGTTGAGCAGAGTTCATTGCCAACTATCAATCATTCTCCCAGTTCTAGTATCATGAGCCCAACAACCGGCAGTCATTTATCTGGAT
Unigene0044906	1944	G	*	A	ACAGTTTCTATGGGGAAGTCCAAACTTATCCTCAGCGCAAACCAAACCTTCAGCTTGGCCAAAACCATCAGTAGGACATCAACTTAGTACATCAAACGGAACGAGTCATGCTTTCCCATACTCAAGTCGGAGCAATTCCTTTGTCAATTC(A/G)TCCCAGCAACATCACCATCATCATGTTGGTTCTGCCCCGTCAGGCTTGCCTTTTCAGAGGCACTTCGGTTTTTTCCCCAAGTCATCTGAAACTTCATTGATGAATAATGTTGGCTATAGTGGCATGAGTCTTGGGCACACTGATGGAAAT
Unigene0044919	333	C	*	A	GGCATCAAGATCTTATGCTAATCTTTTGGACTTAGCTGGTGGAGGAGACTTGCTTGATATTCCTCACACCCCAAGAACTCTTCCAAGGGTTATGACTGTTCCTGGAATTATTTCTGACCTGGATGGTGAATCAGACGTTAGTTCTTCTGG(A/C)TGTCGGGAGCGGAAAATCATTGTGGCAAACATGTTGCCTCTGCAGGCTAAAAGAGATATTGATACTGCTAAATGGTGTTTCAGTTGGGATGAAGATTCAATTCTATTACAATTAAAAGATGGTTTTTCTTCTGATACTGAGGTAATCTAC
Unigene0044936	555	G	*	A	CACAAACAAGGCTGATTGCTTTCTTGCGTGAGACGGAATCAGCTTCACCAGCATTTCGGCGGGCACTCCCTTAAGCTCGTTGGCTTTGAAGTTAAATAAAGGAGGAAGATGACGCCCATTTGGTAGGCGGGTATTTGGATCACGCAATTC(A/G)TCGAAGAATGGATGAACCAAAGCCTCCAAGGCTGTGCTTCGAAGATTTGGAGAGTATTGCAGAAGTCTTGAGACGAGATCCACAGCCTCAGGTGGCATACGCTTGCGAAAGATCTTGTGCCATGGATGAGNNNNNNNNNNNNNNNNNNNN
Unigene0044937	499	G	*	A	CACGGTCCCTTCTTCGATCGAAGAAGAGATTGGTAATTTGCTTCCTGATTTCATCTTCTTCACATCTTGGCTTGAACAAATGAAGATTCTTTTTACCATGTTACAGAACTCAGGCCATGGATCGTCTCCGACAAGCATCATATCTCCTTC(A/G)TTGTCGGTGAAGACAATTTCCCACTTGTTTCTGTGTTGAAGCTGTCCCTTGATGTCGAACAACTCTTCTAATTCATCGATAAGTTGATCATACCCGTTCAACATTGCCAAATCCACCGCTCGGCCAACTGCAACGCCCTGCATTTGAACC
Unigene0045128	95	G	*	A	NNNNNNNNNNNNNNNNNNNNNNNNNNNNNNNNNNNNNNNNNNNNNNNNNNNNNNNNCAATTCACCTGCTAAACTGCCATCGCCACTCATTCATTGACACACTCTATCCACTCACCAATGAACACACTCATTTCCAAAAACTAAAACCCTA(A/G)AACACTCACTTCCAACTTCCAGCTATGGATAACGACGACCCTCGTAACGGCACCGAACAAAACCACCGTGACGGAAAGAAACTAAAGCTCACTCACCCCATAACAGAACACGAGATCCGCCACGAATTCTCCCACCACCAAACCGCCGTC
Unigene0045144	1656	G	*	A	CAAACGAGAAAGCGCATCAACTGCTGCCAGTAATGCAATTAAGCCAGAAATAGGGGAATCTGCACCAAGGCTTTTGTCCCGGAAAAAGGAAGCAGAATCCATAGAGGCTACTGTCAATATAATGGGCTTAGGCGGCTTTAAGGATGAAGC(A/G)TTGATTGGGGGTAGCGACGACCAAACACTGTATCCACCTAAAGGGAGGCAAGTTCCTTCTTTTAAACAAGACTCTGAATCATGTGTTCCAGATTTCATTGTCTGCATCACCAGATCAAACTCAGCCACATTAGAAGTATAAGCTTCCTTT
Unigene0045147	210	G	*	A	CTGAATACTCTCTCTGTTTTTTTTAGTGTTATATTTTTGATTTTTTATACATGTCAATAATTATTTTGACAAATTAATATAGTAGCATTGTACTCCAAATCATTGTGCCACAACAGATCTATAGCCATGTCTGTGTCACTAAGCATTGCT(A/G)CCACTACTATACTCTCCTTGCATCTCCTTCTCTTCCTTGTTAACGCTAACTCATCCATGGATCCATACAAAGTACTCAACTTAATCCTCAACCCAAACGGCACCGTCACACGCTTACAAAAATTCCCACAATCCCCACCCTCACCGGATC
Unigene0045215	2530	T	*	A	TATGGTTATGAGATACCGAACACAAATCAATCTCTTATGTTATCAATGATACTCTGCTATGTCTTCCTTGCGCCAAGTTGTAGACTTGAACTTCATAGAAATTTTAAAATGTTATAGAACAAAACTCATTTGTTTTAAAATGTAATACTC(A/T)GCTGTGTTTACTTGTCCTATTGTATGTGTCTCATCCTGCAAACCATCACTATTTTGTGGCCTGGTATGTAAAGATTTTAGAAGTTTGGTTTCTGATCTGTAAAGCGAATCTGGTTTATTATATTCTTCAGCAAAATATGTTTTGTTGTGT
Unigene0045254	97	G	*	A	NNNNNNNNNNNNNNNNNNNNNNNNNNNNNNNNNNNNNNNNNNNNNNNNNNNNNNTTTTTTTTCAGTAATAATGTCAGACCATGAAATTTCTGTTGTAACAATGAACTAGTAGACCCTGTTATACTTTGAAACAATAATCCAAGATCAAGA(A/G)CATCTGTTTACTTAACTATAATTAACATAGAAAACATGGGGTCATGTTTAAATAATTGGCAGGAATGGGTCGAATAATGGCTTCAAATAGCCAACAGTATATATATATTTACAAAACTATCTATCTGAAAGGAAGAAGAAAAAAAAGCGA
Unigene0045289	490	G	*	A	GCCAACAGTTCTGTTGAACCAAATTTATTCTTCATCATAAGTTCCTCCAACTTCTCCAGAAAATCAGCTACCACATATCCTATTGGCTTCTCAAGGTTAATCACTTTTGTCCTTTTCCAACCGATTTCAAAGTTCGGTGGCTCCGATTTC(A/G)CTAGGTCGTTTTTCGGCCTTCTCCATCTTATTATCTCTGATCTTCTTCTTTTCTCTAGTGGAAATGTTTCTGGACTGTTCATTGTAGTGTTTGTAGGGTCTGGTGTGGGAAAATCTGACTCAGAAGAAGATGAGTTTAATGAAGTTGTGC
Unigene0045304	208	G	*	A	AATGGCTGCTTCGGCTATAAGTCCTTGCTTCACAGCACCTTCTGTATATCGGCCAAGAAAACTTCCACAGTTCAAATCCAGTCCTGCTAGAATGGATTTGGCTGCAGCTTCCTCAGGAGTCTTGGTATAGTGCTGATCTTTGAAAAGCAC(A/G)TCGACCGAGTCACAATCAGAAACTATATATCCATTTAGTTTCCATTTTCCGCGGATAACACCTTTAAGAAGATCAGGATCAGCACAAGTCGGTTTTCCATTTACTTGATTGTAAGAACACATGACANNNNNNNNNNNNNNNNNNNNNNNN
Unigene0045335	1650	G	*	A	GCTACCACAATACGATCTGATGCTAGACACTCGAGTTGGGAAAGAAGTGGAAGCTGGGAAATCGCACAAGACGTCTTTGCGAATTCAAATGTCACAGAAAGCAGACATCATGTCACATCAAAGGAAATGCGCCAATGACGGGCATGATTC(A/G)TCCTTATGATATATAGTAATGACATCAAGCATAATTGATAAGGGATTCTTGGAAACTAAAGAGGAAAAGAAGATGCTCCTTATCATATTTTGAATAGGAGTTGAAATATTGGTATAAAAACATAGGTTATCTTCTGTGAAGACATGAAAA
Unigene0045394	1292	C	*	A	AATGACTGTAAACCAATTTCATTTGGAAAACACTTCCACCCTTTGCTCTTGGAATTGCAGCAGCCAAAGCATTGGCATGGTGAATATCAGCCTCCAGCAATTTGAGAGAATCATGATAAGGTAAACGAGAAAGCATCATTTCCATTTTCT(A/C)TCACTTTAAAGAGAAAATCAAATAAAGGTTAAAGAGAAAATCAGCAACTCTTCACTTTTTATTGTTGATTTTTGAGTAAGAGAATGGATGAGGAAGAGGATGAAGAAAAGGAAAAGAGGTTATGGTTGTGTTGTGGTGATGGTGGCTGAA
Unigene0045413	1218	G	*	A	AAAAACAACACTCATATTAACCAAAGCCTTAACACGATCAGGCTTCAACAAACAAAAATACCACGCCATAGCAGCTCCCCAATCATGACCAACCAAAAACACTCGATCCACAGCCAGAGCATCGAGAAGTCCGACGAGGTCACCGACGAT(A/G)TGGTGAGCGGTGTAAGAAGAAGGAGAAGACGGTGCGTCGGTGTCACCGTAGCCGCGAAGGTCAGGCGCGACGGCGCGGTAACCGAGAGCGGAGAGGGAAAGAAGCTGATGGCGCCATGAATACCAGAGCTCAGGGAAGCCGTGGAGAAAG
Unigene0045434	992	G	*	A	TGTGAGTTGTTGCCTTCTAAAGTATTCTGGATCAAGATAACCGAAACTACCTTTAACGGCCGTGCTCACGTGAGTCTGATCGAGTGCAGGACCGGTTTTGGAGAGGCCGAAGTCAGCAACTTTAGCAACAAAGCTATCATCTAAAAGGAT(A/G)TTTGTTGTCTTTACATCTCGGTGAATAATACTTTGTGATGCACCGGTGTGGAGATAATGAAGGCCTCTTGCTGCGCCGATGCAAATTTCGAGTCTTTGTTTCCATGACAGAGGTGGTAGGTCTGTTCCATACAAATGACTCCTGAGGGGA
Unigene0045468	843	G	*	A	TTGTCTCAATCCGCCTGCTGCTGTAAGTGCAACCTCTCCACTAGCACCTTCGAAAACATTACACTGAGCCCAAAACCATTTTCTCGGGAATGCTCCACCCCAGTTCTTTTCTGAATAAGATGGGGCATTTTCAAACTCAATCCTCTCGCC(A/G)TCCCACTCTATCCAACCTGTTGAAAGTCCACCACCCATGCATATTTGCCAATGCGGTTCAAAAACAGGAAAAGCTGCAAGCCAGCCAGCAGTTGACTTTTGTGTGGACCCGACATCACCCCATCCATATACAGGACGTGTACTATACTCC
Unigene0045494	1319	G	*	A	AGAAGAAGCTTCCAGCTGATCAGTAGTTATGCCTTTATACTTTAGCTGGTCAGATCCTTTTACATTCGAGAACTCGTGTTTGATATGCATGTCAGACTTACTCTGAAGGTCCTGTATCAGATTACTGGCAGGCTCTGCTACCAAGATCCC(A/G)CCAATTGTAGTTGGTACTTGTTGATTTCTTTTCAGACTGTTTGGTTGAGATATCTGGCAGTTATTTGTAGATGGCGAAGTTGAGCATGATGGAGCCTCTCCATCTGTAAGTGTAGAGGGAACTCTAGTAATTGTGAGTGGCTTCTGTGTA
Unigene0045497	403	G	*	A	AGATGGAACTGTCAGGAGATCCTTCATCACGACAGGTTGCTTCCAATTCTTCTTTATTCCTTGAAGATGCCCCTTTCCAACAACAGCAACAACTGATCTGCTCTCGTTTGCCACTTTTAATAATGTGGAGGACATGTACTGATCTCGTTC(A/G)TGGACAAGGGTCTCCATTAAAGTTGGAAACTCCTTACTCATTTCTTGAATAACAAGAGTTAGCATGTCACTGTCATCCATTTCCTTTAGCATTTTATTAAGATCATCGGAGCTGGGTAAAAAAACTGCCTGGAAAAGTAAAGAGTACACC
Unigene0045552	76	G	*	A	NNNNNNNNNNNNNNNNNNNNNNNNNNNNNNNNNNNNNNNNNNNNNNNNNNNNNNNNNNNNNNNNNNNNNNNNNNNGCTTAATGACTCTTAGGAAGAGAGGTGTGAACAACAACCCTTGGAGTGAGTAGAGAATGGAGGAGGAAGAAGAGA(A/G)TGCACCGGCGGCAATGGTGAAGTTGGGTTCATACGGTGGTTCGGTCATGTTGGTTGTTCCCGGGGAGGAATCAGCTGCTGAAGAGACCATGCTTCTTTGGGGTATTCTTCAGCCTACTCTTTCCAAACCTAATGCTTTTGTTGCTCAATC
Unigene0045552	354	C	*	A	CCTAATGCTTTTGTTGCTCAATCTTCCTTGCAGCTCTGCCTCGACTCCTGCGGTCACTCTCTCTCCATTCTTCAATCACCTTCTTCCTTGGGCACACCTGGAGTAACTGGATCAGTGATGTGGGACAGTGGAGTTATGCTGGGCAAGTTT(A/C)TAGAACATTCTGTTGACTCTGGATTGCTTGTTCTTCAAGGCAAGAAGATTGTTGAATTGGGATCTGGTTGCGGTTTGGTTGGTTGTATTGCAGCTCTTTTGGGTGGTGAAGTCGTTCTTACTGATCTGCCTGATAGACTGAGGCTACTCA
Unigene0045553	1181	G	*	A	GATGCTCCCTAAGATTTCTAGTTCCCTTTCAAACACTTGATCCGACCCTTCACGGCTTCGGTCAATTCTCTTAACAGCAAATGTGCCACAATCATTCATCACCATTCGGTAAACAGTACCAAATCCTCCTGACCCTACGATATCCTCCTC(A/G)TCAAGAGACTCCAGCTTCTCTATGATTTCAGATGATGTGTATGGCATATCACCGTGGAACGTAATAAGTTTAGCACTTGCTGATGGATCAACTTGTTTCTTGACTTCTGTGTATTTCCTAACAGCTCGTTCCTTCTTCGACGATGAACGA
Unigene0045752	265	T	*	A	CTTAGCCTTTGTTCAGTTCTGATAATCAGAACACTATTTTACAACATGTAAATTTGTAACATAACAGCTCTATAATCAATCATACAAATGGCAAAAGTACATGAGTTGGGAGGAACTGTTGTTTACACCCAAAAATATTAACTTATCGAC(A/T)CGGCTCGCCTAGCTTTCCAGTTCGACAACATTTGAACAAACTAGTCGCGATGATACTTTGAGTTTTGATCAACGAGCAACATGCGTGACATAACATATGACAAGAGTTCTTCCCGGTGCGAGAACGTGAAGTCCAAATGCGCATATTCAA
Unigene0045791	65	G	*	A	NNNNNNNNNNNNNNNNNNNNNNNNNNNNNNNNNNNNNNNNNNNNNNNNNNNNNNNNNNNNNNNNNNNNNNNNNNNNNNNNNNNNNNAAAGAATAGGCATGAGTTATTACTACTTCAGAAGAACCTCGAAGCACAAGTTCATATAGAAATC(A/G)AACATTTCGTCTGAATCACTTCATCCAAACAACTCCCTAACACCGAACCGCCGAGAAGATGGTAGTGATAGAGCAGGAGAAGACCGACGATCGAAACGCGAATCTATCAAACGCTACTGCCGGCAACGACGCCTCCGACGGCTTCGAAAC
Unigene0045878	1262	T	*	A	GATGGGCGTAGATATAAGGTCATTATACGCACAAGCCCTGATTGGGATGCTCTTGGGTACACTGCAGGCTTTAACACAGAGAAAGGCAAATGGCAATCGATTCAATTGCCATTTTCTTCCCTGAGGCCCATATTTCGAGCAAGGACTGTG(A/T)CTGATGCTCCGCAATTTGATGCCAGCAACATTGCATCACTGCAGCTCATGTTCAGCAAGTTTGAATATGATGGTAAATTAAACGAGACTTTTGCGGAAGGTCCGTTTGAGCTTCCAGTGTCTAGCATAAAGGCATATATAAATGATCCAA
Unigene0045914	180	G	*	A	TACAAGGGAACGAAAGTTCGAGACTAAACACACGAAGGCATTGGCAATATTCCATGTATACATACACCGAAACAAAAGAAATAGGCATAACTTTCCCACCATCGTTTCATTTTCATCTACCATCTCTGCTATAACAGTTCATAATCACAC(A/G)TCGACGCAAAATCCTCCGAGTGGAAAATACGAGCAAGGGTTGTGAGAATCAAAGATGTTCAAGAAGGCGGTGGAAGCAAAGTCTCAGCAGAGATTATCCGGTGCCGACAGGAAGAAGCTAAAACGAACCATTAGAGACAAATTCCCAAGA
Unigene0045914	957	G	*	A	TTTGGAAGATGTTGTGTTTGGGCATCCTTCTTTATTATCTCCACCTTCTCATGACACTGATTTGGCTGAGGCTTCTGGTGAGACATCAAATGGCCAACAAAACAACACGAAAAGTGATGAAGCGGAGGGATCTCTAGATGTAAATGAGTT(A/G)CCAGCCGACTCCAGCCATACATCAACAAGACCAAACAGTGACGTAAATACAGCGGATGAAATAACTGCTGGCATGGGTGATCTGAAACTACCTGATAGTGGCTCGCCTAATGAACCAAATGACCAACATACTCTATCAACCTCAGATGTA
Unigene0045914	1683	G	*	A	GAGTCTTTTTACTGCTTCTGAAGCCACTGATATTGTCTTCGCATATGTTGAAAAGGAAAATTTGGTGAAACCAGCAAATAAATCCCTTGTGGTTCTAGATGCAATGTTATGTGATGCACTGTTCAAGGGGGCTATTAAAAAAGGAACTAC(A/G)TATCCTACAGAAATTCACAAGAAAGATTTAGGCCAAACATTTGTGAGCCGAATGCAACCTCACCATGTTGTGACTAGAGGTAATGAATCTGTAGTTCGTAAAGGTGCACTTAAAACAATTCAGATGTTGACAGAAAGGCGGCAAGGCAAC
Unigene0045923	305	C	*	A	TGACAGCGCGTAACACCCACTCGCCACTCCCATGACGGTTGTTTCACTCTTCCTCACCGCCACCAAACTCGCCGGAGCCTTAGTCACTCTCTCCCTCGCTGCCAATGTCTTCTCCTTCTCTCGTTTTCGCAACAAAAACCTTCGCCAGTT(A/C)GGTTCCCCTATCGATGAATCCTCCGATACTCTCGCCGATTTCAACATTACCGAAGGAGAAAACGAGTTTTTCTTTGGTCTGGCAACAGCACCGGCACATGTAGAGGACAGGCTTGATGATGCTTGGATTCAGTTTGCTGAACAAGAGAGT
Unigene0045923	2140	G	*	A	GCCGTTTCTATAGATTCATTATTCAACCATTACCCCTAAAAAGGAAAAAACAATCTCAAAAGAAGGAATTAGTTCTTCAACCTCTTTGAACTTGGCCATTGATAATTTGTCAAATCTCAGCAATAATCCCTTAATTACTCGAAGTCACTC(A/G)TATGTATACATATTTAAATACACTTAGCCAAATGACTGAGTGGACTACACCATAAAGCCACTGCAGAGGATCCATCGCACTCGGGATCGCATTGTATATCACAGTTGTATAGTTTGTCTTCCTGCTTGGCTGCATTGTTCAGATATAATC
Unigene0045928	1399	G	*	A	GTGGCAGTCGTCATCGTCATCATCATGGTTCGTAAATTGAAGCCGTGTTAAGACACTCATTACAAATGACGATCTTGTAAATGACTTCAATTTACTAACCTTACTAATTGTCCTATATTTAACCACAGAAAAGTCCTAATTTGGTGCATA(A/G)AAGTGAACTTTAGTTTGTGTAGCACAGTTTCAGATTAGAGGCAGTTGCAAATATGTATCAATACATTATCAAAGTAATTATTAGTGAGCATAATCTTCTCTATTTCAGTGTCTATTTCTTAATTTACATTGGATGTTTTCAAGAACAATA
Unigene0045960	223	G	*	A	CTTCTCCTTGGAAAGCCGTGTTGCAACACGATCCAAAAGCTCAATTGAAGGAATGGTTGGTCTGATATAGAAGAAACCGGAGTTGTAAACCCATATCCTCATTGTGTGTGCGTATCGAGCCCAACCCATTGCAGGTTCGTCAAAGACATC(A/G)TTAAAGCCGTATGCTGTCATGTTACTATGACCATCACTCATGGACTCGACATCTGAATCACGGTATAAATGATTAAAAGGATTCTGCAAATATACGATGTCAACATCTGATAGAAGAACACTATATCCCAACTGCAAAAATTCTCTAAGG
Unigene0045960	232	G	*	A	GGAAAGCCGTGTTGCAACACGATCCAAAAGCTCAATTGAAGGAATGGTTGGTCTGATATAGAAGAAACCGGAGTTGTAAACCCATATCCTCATTGTGTGTGCGTATCGAGCCCAACCCATTGCAGGTTCGTCAAAGACATCGTTAAAGCC(A/G)TATGCTGTCATGTTACTATGACCATCACTCATGGACTCGACATCTGAATCACGGTATAAATGATTAAAAGGATTCTGCAAATATACGATGTCAACATCTGATAGAAGAACACTATATCCCAACTGCAAAAATTCTCTAAGGATACGGAAT
Unigene0046019	400	T	*	A	GCTTAAATTCGAATCAAACGTGCTTTTTTCTAGAAGTCGAAGAACAACTCAATAAAGTTATATAGATAGAAGAAAAAAATAAGAGAGAGGAAAAAAAATGAAAATCCCTTGTTGTTCGGTGTGCCAAACGCGGTACAACGAAGAAGAACG(A/T)GTTCCGCTTCTTCTTCAATGTGGCCATGGCTTCTGTAAAGAGTGTCTGTCTAGAATGTTCTCCGCTTCTTCCGACGCCACTCTCACTTGTCCACGGTGTCGCCACGTGTCAACCGTCGGTAACTCCGTTCAAGCGTTGCGGAAAAACTAT
Unigene0046020	758	T	*	A	ACTTCACGAGGTTGGGATTGAGCTGGAAAGGAATTTTGACGGAAAAGCTTCTAATCTTGTAGAGCAGTGTGGAAAATCAGCTGTGAATCTTGTTGCCCTTGTTGCACGTCATTTTCCTGGCTTTAGAGACCACTCAGTGTACAAAGGTCG(A/T)CAAGTATTTTTATATAAAAGAGCTCAGATATTTGTAGCAGATTTATGGGGTGCATTTAATGGCCAAGGGTATGGTGAGTTTAAAGACATCAGCTCTCTGACTATAATGGCGGACTATATTGTCCCAGCCGTGCTTCAGCAGCTTGGTATT
Unigene0046031	1490	G	*	A	AATTTTAGGATCAGGTTCCAACATCTGACGCACGAGGCTCTTGGCACTGTCAGAAATCTGAGGCCAAGGCTCCCTCTTGAAGTCAATGACTCCCCTCAAAATCGCCAAAGCAACCCCTTGTTCAGTCTCAGCCCAAAACGGAGGCACCCC(A/G)CATAACAAAATATATAGAATCACCCCTGCACTCCATATATCAACCTCGGGACCATATTTCCTCTTCAAAACCTCTGGTGCCATATAGTAAGGACTCCCCACAATCTCCGAAAATTTCTCCCCAGGCTTGAAGAAAACGGAGAGGCCAAAA
Unigene0046036	1409	C	*	A	TTGATTCTGGATCCTGAGACCGGCGAGTACAGCGACGAGAAGACGCCGAGCTATGGGAATGATACATTGGAAGAGTTTTTTGGTAGGGTGCTCAGGGAAGGGATGGCAGGTCAAGAGCTAGGTGAGCAGAATATATTTTAAGATGGTTTT(A/C)TGTAGCAAATTTTGTTTCTGTATAAATGTATGTATTCAACTATAGTCACTTTAACATTTACATGTTCAAGCATTGTTGAGAAAAACAAAATCAAGTATCTGGATTTGCATTGTTGATGATTCATTCTTCAATTGCATGGATTTGCTCCAC
Unigene0046048	912	T	*	A	AATCTGGTACGTTGTTCTTCTGAAGGCTTTCTCTTTTTTAGCTTATCACATAATTTTTTGTATTGTTTAGATCTTCAATGTTGTAAAATATTCTGTCTCCAATTTTATGCCATAGACGATTTACCGTTATATGCAAACAAAATCCGTAAG(A/T)CATTTTGAAAAATCTGGTTACTTAAATCAGCTAACCCCACTCAGAGACATTATTACAAAGGGAAATCTAGTACTATAATATAAAGTTCCCGATTCTCAGAACATTATGAGTATTTATGTACTTTTTCAGACTTTATAAATTGCTTTTATG
Unigene0046059	216	G	*	A	TTGATCATTCACACCAAGCTAGATCTAAACTCTTTTGATGAAAATGACAATATATACACATATTGACATACACCGTGGTAATGGTGTTAGTCCTCAACTCATATCATTTACATTTTGCAACTAGTCATAATATGTTCAATCGATTTCGGC(A/G)TGTACATAATCGACGAAAACAAAATTCTTTTCTAGTTGGTTTACCGCAAAAGCTAAGGCTGCGCTGACAACCGCGAGTCCAGCCAAAACTACGCGCAGTTGAGTATCGGATGGAACTCCAGAAGTCGCACAAAACACAACTGTTGCACCA
Unigene0046059	459	G	*	A	GCGCAGTTGAGTATCGGATGGAACTCCAGAAGTCGCACAAAACACAACTGTTGCACCAATTAGAATTTTCTGCCATGTTTTGAATCCCTCATAAGCTCCTTTACAAGATGAACACTTTAGTGTATGCTGTTCAAATCTATCCAACATCTC(A/G)CGTTTTGATAGTACGGTGGATGGCAATGGCTGGCTGCTCTTGCTGAACCATTCCGGTTGGCCATTACCGTGTCGCCTCAGCCAATTTCTAAATGCCAACACAAAACGATCAGCCTGCGTCGGCGTGAAGGTGAGGCTTGTGTACTGTTTG
Unigene0046118	52	C	*	A	NNNNNNNNNNNNNNNNNNNNNNNNNNNNNNNNNNNNNNNNNNNNNNNNNNNNNNNNNNNNNNNNNNNNNNNNNNNNNNNNNNNNNNNNNNNNNNNNNNNGAAGAGTTGTATATCAGGACTATAAAAATAACAATACTGGGAGCAACAAAT(A/C)ATCTAAACAAGGGATACAATTTCGGTATCTCAACTTCTAGAGGATTTTATCTGTACCATTTTTAACTACAATTCTGTTTTCAAATTCCCATCCTCTTGACCAGCATTATCTGCTTCGCCTTTCTCTCTATGTTGCTTCTGAATGAGTTCG
Unigene0046135	205	T	*	A	CTCTGCTTTCACCTTTCGAAGCTCTTCATTCACCTCCCAATCCAAGAAGGCTGGGTTCCTTACACAGTCAACCAGTAACTCAACCATTTGTGGAACGTAAGTCTTTAAAGCATCAAATGTGTAGCCCATTTGTTCTCGAGAGGCCGAGGC(A/T)CCTATATTACCACCAATTGCTTCTACTTCCCTTACAATACGAAAATGACTACGGTTAACCGTGCTCTTGAACGCCATTCTCTCAAGCAAGTGTGAAGCCCCACTTGACAACGGTGTCTCATAGATGGAACCACAATCGAGATATAACCCA
Unigene0046152	495	G	*	A	AACCTGCCCTGATCAATGCACAGTGTGCGATGGGACCTTTTTCCCTTCCCTTCTCAATGAAATGTCAGAAATAGTGGGATGCTTTAATCAGCGTGCACAGAAATTGCTGGAACTGCATCTTGCTTCTGGATTCAGAAAGTACATTATCTT(A/G)TTGAAAGGGAAATCAAAAAGGAATCATTCTACTTTAGTTCATGAAGGCAAAGATCTAGTTGTATATGCACTTATAAATGCTGTTGCAATTCGCAAAATATTAAAGAAATATGATAAGATTCATTATTCCAAACAAGGGCAATTATTCAAG
Unigene0046189	557	G	*	A	AGAAGGTATCCTTTCACCCTTCTTCAAAAGTTCTTGCAAGTTAAGTCTTTGCAAGGTCAACACCGCCTTTGTTTCCTTCCAAATGAATGCAATTACACCATTATGAAAAACAAAGAGCGAGCCCGGCTTTGATCCAGGATATCTAAACCC(A/G)TAACCACTCGCAATACCCTCTCCGGTGAAAGCATGCTTGATATTCACCGGCAATGAATCTGCATCAGTGTTCCAAGGAAAAGGTTCGGAGGAAGGTTCGTTGATATTGGCTATAAACATTGCAGAACCATTAGGATGCAAGACATAGTGT
Unigene0046189	1778	G	*	A	AAGCAACAATATATTGCAAAATTTATCAATCGACTTAGCCAAACCAGGATAAACATAATCAACACCCTTCTCCCTTCCATGAAGGAAAAACATAGTCGAACCATCAAAATCAGCAACAACTTCGAAAACAGACGCCCATAGAATCGGACC(A/G)TCCTCCATACCTAACGGACCTAGCTCTTGAGGAATTATCCTACAACCAACAACAGAAACAAAACCAGGCATCACATACACAACATTCCCCAGCTCCGGATTCTGATGAACCCATATCCCAATCAACGGTTGAACTTTCACCAGAAAACGA
Unigene0046222	87	G	*	A	NNNNNNNNNNNNNNNNNNNNNNNNNNNNNNNNNNNNNNNNNNNNNNNNNNNNNNNNNNNNNNNNTGGGTATTAGGTATGATATTATAACTGTAAACCGTGCCACAACTACTTCCACCTATTTTCAATTCACAGTATCATATGGCTTCGTT(A/G)TGGCGCGCTGGGACCAAGCTAACTCTACTAGCATCCGCTCTCGGCGGCGGTGGCGCAGCGGCGCTCATTGCCACCTCCGACGATCCTGCAATGGCGTTCAATCTCTCCACAACCATCCCTCGTCGACTCTTTGCCGACGCCGTCGCTGCC
Unigene0046245	748	G	*	A	GTCGCGTGTTGCACTTAGTGTTATGGGGTTGGCTAAATTGGGTTACTTGAATGATGTTGTTGAGTCTTGTGCTGTTTTGATAGCTGGTGATGTTGTTTGTAGTTTAAATGGTGTTGTTTTGGAGACGGATGTTGATTTGTCTCGTCCTTC(A/G)CCTATTGTTATGGAACAGTGTCAAGATGGTTTGTCTTGTTTGTATTACTTGCTTCAGAAGTTTCCTTCCAAGTTTAGTTGTGGTGGTGGAAATGGTGGTGGAATTGATGGTTTTTCGAGTGTGATGGAGGGTATTGTGAGTGTTGTTTTG
Unigene0046360	138	C	*	A	NNNNNNNNNNNNNTTTTGTTATTATTTGATTTTTCTATTTTTATAATTAAGACAAAAAATTATTTAAATAACCTCAATTATGAATCAAAAATTCAAAATGAAATTCCCTTCTCAGAAAACATGCTTCTGGCTACCCTGGCAAAGGAAAAA(A/C)GAACATATTACAGTCCACGAGTCAGATCTGCATATCTGGCAAATAAGTTTTTGAGGGAGGAATCTCTAATGACTTTTTGAGCCTAATTTGCATTTGCAAATAGACCATGTAAAGACTAACCAAATTTCAAAGAATAACAATGATTAGTCT
Unigene0046392	3872	T	*	A	TGATCCAGAGATATTTGAGCAAAGATATCCAGTGATTCTGCACAAGTTTGGACTTAGAGCAAACAGTGGGGGGGATGGATTTCACAGAGGCGGTGATGGGCTTATCCGGGAAATAGAGTTTAGGCGGCCAGTTACTGTTAGTATTCTTTC(A/T)GAGAGACGTGTCCATGCACCAAGAGGGCTGAAGGGAGGAAAAGATGGTGCACGTGGTGCTAACTACATTCTGAAAAAAGATAACCGAAAGGTATATCTTGGTGGTAAAAATTCTGTTGAGGTGCTTCCTGGAGAAATTCTTCAGATTTTG
Unigene0046403	703	G	*	A	ACCTAAAGTACCCGCATTTGTGCCACCAATCAACCATAGTTTTTCAGCTTCTTTCGAGTAGTGACAGTCAACAAAATAGTCAACATGATCCAAATTCCAACTTTCAGAAGCTAATGAACGAGCTTCTGAGAAGTTCACTTCATTTCTACC(A/G)TCTTTCCAATCCCATATACCAGCGGTTTCAATATGTGTTAAACACCAAAGCTTCTGATAACTCTCTCCAAAAAAACCCACCTTTGCAATTGAAGTTCCCACATTAATCACTGAATCTAGATGATCATCGTCATTGATATCTCCACTGGTA
Unigene0046403	832	G	*	A	GAAGTTCACTTCATTTCTACCGTCTTTCCAATCCCATATACCAGCGGTTTCAATATGTGTTAAACACCAAAGCTTCTGATAACTCTCTCCAAAAAAACCCACCTTTGCAATTGAAGTTCCCACATTAATCACTGAATCTAGATGATCATC(A/G)TCATTGATATCTCCACTGGTATCAAATATGCAGATCAACCCATCTACTGAAGCCGAAATGAGCCTGCCTGGTTCATCAGGGACAAAATGAACCTGAGTTACATCATCCATATGAGAATCTTCTAGACAAGCAATTTGCTTGTTATTTCTC
Unigene0046444	627	G	*	A	TTGCTAAATGTGACCGAAAACGCGTTCTTTCATCTTGGATTCCATATTGTAGTAACTTGGTCCCAGAAGAGTTTCAGATAGAGTTTTCAAGCGTGAGGCATCTCAGTCCACAGCAATTTGTTGAGAAGTTATCAAAAGAACTTAAAGTGC(A/G)TGGAGTTGTTGCAGGCGAGAACTACCGATTTGGATATAAAGCTGCTGGAGATGCATTGGAGTTAGTAAAGCTTTGTGAGGAGTATGGAATGGAAGCTTACATAATAAAATCTGTTATGGACAAGAACCAATACTCTGCAAATATAAATTC
Unigene0046462	52	G	*	A	NNNNNNNNNNNNNNNNNNNNNNNNNNNNNNNNNNNNNNNNNNNNNNNNNNNNNNNNNNNNNNNNNNNNNNNNNNNNNNNNNNNNNNNNNNNNNNNNNNNAGTCATTGCTGTCAAGCAACATAAGTTGGCTAGCTCTCAGGGTGATCTTGA(A/G)TTCTGCTCAGAGGTAGAAGTCCTGAGTTGTGCACAGCATCGGAATGTTGTTATGTTGATTGGGTTCTGTATAGAGGATAAGAGAAGACTTCTGGTTTATGAATACATATGCAACGGATCATTGGATACTCATTTATACGGGAGACAGCAG
Unigene0046640	275	G	*	A	ATCTTGTTCTCTCTTTCCTTCTTTCTTATCATTTCACTTTCACAAGTTTCTAACAACCAGTTTTGTGAAGATGGAATTGGATACTGTGAATCATCATCCAACAAGTTGTTAATCAAAGGTGGCACTGTGGTCAATGCTCATCACCAACAT(A/G)TTGCTGATGTTTATGTAGAAAATGGAATCATTGTTACTGTACAGCCAAATATTGTGGTTGAAGATGATGTGTATGTGATAGATGCCACTGGCAAGTTTGTGATGCCAGGAGGCATTGATCCTCACACACACTTAGAGATGGGCGCTTTGG
Unigene0046659	540	G	*	A	ATACGATAAAGGAGATCATTGCCGAGGTCGATACAGACAATGATGCGAGAATTAACTATGATGAGTTTGTAGCCATGATGAGGAAAGGCAATCCAGATATAATAACCCAAAGACGTCGCAAATAAGCTCTACATAAGCTGTTTCGGTTAC(A/G)TGGACTGAATTGCGTTCGTCGAGTTTTACTCGCACCTTGTTTCGAGGGAGCACTTTTGTGTAACAAAGTTTTTCTGTTTAGTGTTTTGCCTGTTTTGCCTGTTTTGCCTGATGTTTTCGGGTCTAGTTGCATTAAGTTTATTTCTAGTGT
Unigene0046674	91	G	*	A	NNNNNNNNNNNNNNNNNNNNNNNNNNNNNNNNNNNNNNNNNNNNNNNNNNNNNNNNNNNNTGTGCATGCACCAAGAAATAAGATAACATTAGGATGTCGGAGTCGGCTCAGAATAGATATTTCATTACAGAAATCTTCCATGTTTTCGGC(A/G)GTTAAATCTTGCTCTAGAAAAACCTTGATTGCAACATCTGTACCATTCCATATCCCACGAAAGACTTCTCCAAAGAAGCCAATCCCTACACGAGTTCCAACAGTTAACTCTGAGAAGTCAATATTCCATCCTTCATATGGCAATAAAGGT
Unigene0046763	117	G	*	A	NNNNNNNNNNNNNNNNNNNNNNNNNNNNNNNNNNCTGCATTTGGATATTCCTTAAAAAAAAACAATTTCATTGTTATTATTATTATAATAAAGATAATTTCTTCATATACATGGCAATGACTAAAATGTTGTTCAGTATTCAGTTCACCT(A/G)TACATGTTTAAGAAACAACAAACCAATAATAACAGGACAATTAAACGTTTCCTTCTCATTAGGTAAAGCATTTGATTTTGACCATATTACATGACAAAGATATGAACTTCAGTGGATTCATCCAGAACTCAAACCACCCTGTCTTTCACA
Unigene0046784	620	G	*	A	CGTCTCACCGAAGTAATTCGGATGCCGGCAGTAATACCATAAGCCATTTTCAAGTACAGGAACAACAGGCTTACCAAGCCCTTTTAGCTTGTTGTTTCTACTCATAAAGTCATGGAGCTGTGTATCAGCAAAGTAAGCTATAACAACGCC(A/G)CTTAAACAAACAAGAACGGCCACCAAATCCAAGATACTCAAAGGCATGTCGACAAAGTGCACTATATATAAAGGAAGGGACAATCCAATCAAAAACATCTGCTGTGAGACATAAACAGCAAAGAATGAAATCCACCACCAATGTTTCCCA
Unigene0046923	1653	T	*	A	TCGTCTCTGCAAATTGTTGAATTGTTTTGGAGATCTGCAAATTGATATCAAAGAGTATTCTAGTCTACAACATCAACGTGTAAGAAGTAAGACATTGAATGAATTTCGGAAAGGGATGTTTCAAGTGCTTGTATCTTCTGATGCGTTGAC(A/T)CGTGGAATGGATGTTGAAGGGGTAAGAAATGTCATTAATTATGATGTGCCCAAATTCATAAAAACTTATGTTCATCGGGCTGGTAGGACTGCTAGAGCGGGCCAGGCTGGGCGTTGCTTCACATTGATGTCAGAAGATGAGGTTCGGCGA
Unigene0046982	441	G	*	A	TCGAGCCAAAAAAGACAGTTCCCTGGTGAAGATAAAAGTTCTGTTTTTCGCACGAGCGCGTGATCTTACCGGCTTGAGTGAGGTACCATTGGAAGTGTCATCTGGGAGTACTACTCGAGATTGTTTGAAAAAGCTTCTTGTTCAATTTCC(A/G)CGTTTGGAAGAAATACAAGGATGCATGGTTCTGGCTCTGAATGAGGAGTATACAATGGATTCAACCATTGTTAAAGACAAGGATGAGTTGGCCATTATACCTCCAATAAGTGGTGGATGATGATTCTACTTGTTAGTAATTTTCTTCCTT
Unigene0047013	1633	G	*	A	GTAATCTGCTCCGACACCTGGTCTGCTATTGACTGTGTATGTATCTTGTCCATCCGAGAGTAATATGATGCTGCAAACTGGATTCTTCCATCGTCGATCGGAAAACACTTTGGCACCTTTCCTCAAGCCTTCGGCAATGTTTGTTCCACC(A/G)TTTGAAACCAAAGAATTAACAGCATGCAACGCCTCTTGCCGTCCGATTTCAGTCATCCTCCGAAGAGGAAAGATGCGGCGCGCTGTGGAGGAGAAGGCAATGACAGACAGTCGGTCTGAGGGACCCATATTCTGAATGACAAAACCCATA
Unigene0047015	2669	T	*	A	ACCTAGGCCTCATCCAAATGAATGCTCTGGAGGCGATCTTGATGGGGATTTGTTTTTCGTAAGCTGGGACAAAGATCTAATCCCAGCTCAAACTGATAATCCAATGGACTACACAGGAAGAAGACCTCGTATAATGAATCACCAGGTGAC(A/T)CTAGAGGAAATACACCAATTTTTTGTTGATTACATGATCAGCGATACTTTGGGTGCTATCTCCACCGCACATCTGGTTCATGCTGACCGTGAACCAGATAAGGCCAGGAGTAGAAAATGTCTGGAGTTGGCCGAGCTTCATTCCATGGCT
Unigene0047016	93	G	*	A	NNNNNNNNNNNNNNNNNNNNNNNNNNNNNNNNNNNNNNNNNNNNNNNNNNNNNNNNNNGATCCTTGGAGATATCTTCATGGGCCGGTATCACACTGTCTTTGATTATGGTAAACTCAGAGTTGGATTTGCCGAAGCAGCATAGAGAATCT(A/G)CTCATGCCTTGCAGAATGGCATCCTTTACTTGCTAGTCCTTTTTTTCCTCTTCAAAAAAATATCAAGGGAAAGAGCAGCCTCAGTATTATTTGGCAACAGTTATTTGATAATATTTTGTATAACTTTGCAATCAAAATGAGCCTATAATT
Unigene0047046	202	G	*	A	GATAGCATTGAGTGTGTTTCATCTTCCGATGGAATGGATGAAGATGAGATCCAACACCGTATTCTTCATCCTCATCCATATCAACATCCACATCATCATCATCCTCATCACTCTGAGTTTTCTTCCTTGAAACCTCGTAATGGAGGAAAC(A/G)CTAATAACATTAATCATGTTATTGGTTCTACTGCTATTGCTCCTGCTACAAGTGTTCATGAGTTGTTGGAATGTCCCGTTTGTACCAATTCAATGTATCCTCCAATTCATCAGTGCCACAACGGCCACACATTGTGTTCCACATGTAAAA
Unigene0047046	234	T	*	A	AATGGATGAAGATGAGATCCAACACCGTATTCTTCATCCTCATCCATATCAACATCCACATCATCATCATCCTCATCACTCTGAGTTTTCTTCCTTGAAACCTCGTAATGGAGGAAACGCTAATAACATTAATCATGTTATTGGTTCTAC(A/T)GCTATTGCTCCTGCTACAAGTGTTCATGAGTTGTTGGAATGTCCCGTTTGTACCAATTCAATGTATCCTCCAATTCATCAGTGCCACAACGGCCACACATTGTGTTCCACATGTAAAACAAGGGTGCACAATCGATGTCCGACTTGTAGA
Unigene0047054	113	T	*	A	NNNNNNNNNNNNNNNNNNNNNNNNNNNNNNNNNNNNNNAAAAAACAATAAAGATAACAAAAACAAATCCTTATATTCAGTTTGTCTGATGAATTAATTACGATCTCATCAATAGAAACAGACACAATCATCACCCAAAAAAACTGGAAAA(A/T)TTTATGTTTCATCAAAACCAAAAAATTTTGTTTTTCTAAATTTTCCAATGCAGAGATCAGGTTACGGTTCCGATGGAATATACCGCTCTCTAAGACCTTCCCTTACCTTACCAAAAAACCCGAACCTCTCTCTCGTCACACACCTTTTCA
Unigene0047085	148	C	*	A	NNNGTGTGTCATCCCCTAATTTTAATTACCATTAATTATCTATAAAAATTTAATTCCAAGGCACAATAAAACATCTTATTAGGATTCTCTAAATGCTCCAGAGCACACATAGTGTGTCATAAATATGTCCATATGTCCATAGAGCACAAC(A/C)TCATACATATGTCCATATTAAAGCACAATAACACAAACTTTATGCAGGTTCCCAACAAAAACCCTAATCTTAATTCTTAGTAGCTTTCTTCATCAACAAGAGGAACATGTTCTCTATTAATAAAGAAATTCTCATAAACAAAACCAGCAA
Unigene0047085	195	G	*	A	ATTTAATTCCAAGGCACAATAAAACATCTTATTAGGATTCTCTAAATGCTCCAGAGCACACATAGTGTGTCATAAATATGTCCATATGTCCATAGAGCACAACCTCATACATATGTCCATATTAAAGCACAATAACACAAACTTTATGCA(A/G)GTTCCCAACAAAAACCCTAATCTTAATTCTTAGTAGCTTTCTTCATCAACAAGAGGAACATGTTCTCTATTAATAAAGAAATTCTCATAAACAAAACCAGCAAGCCCACCACCAATAAGTGGCCCAACCCAATAAACCCAATGATCAGTC
Unigene0047103	119	G	*	A	NNNNNNNNNNNNNNNNNNNNNNNNNNNNNNNNGAAAAAATAAATCCAAACCCCCTCTTGTCTTGAGAGTATGAACTCTCAAACACCATTTTCAAATGAGAGAGTAGAAAATAAGCTGAAAAAGCAACAACAGCACACATAACAATAATTA(A/G)CCAAACAAACTCCAAAACTATAAAAAAAAACTGAAAAATTATCTTGTCTACTTCATCTAGTAGTAGATTACTAAAACTCTATTTTCTCTCTATACCAAAAGTAAAGTACCATTATCTCAACTCGTTTTCCAAACTCAACCGAGTCGAACC
Unigene0047109	1184	T	*	A	TCCCCTGATTTCCTGTTCTTTTTTCTCTTTCAGCTCCAGCAAGGTCAATGATAGTCAAAACAGCATTGCTTGACTTAGAATTGACCACTCCTTTACCTTTTTTAGGAACGTCGCGAATGTTTATGATGCACTGTGACCGGCTAGACTGAC(A/T)GTTGGTATTTGTCATTGCAGTTGCACGTTTTATCACAGCTTGTGCTATCAAGGATTCTGCCTGTTCAGCATTAGAGATGAGAACCTCTTTCTGGCCTTTTATGGTGGATTGCTGCATACTTAGTTCACTGCCATCTGGTAATAAATCAAA
Unigene0047159	2815	G	*	A	ATTTCAGAGACTGATTGGGCGTTTTTGTGAACATCACACTCAGTGGAAGCAGTTGGTGTATGCAACTGCTGAATTGGATGTTTTGATCAATTTAGCCATTGTCAGTGATTACTATGAAGGACCAACATGCAGACCGAGTTTTGCTGGGAC(A/G)TTATGTACAGATGAGGCCCCATACATCAATGCTAAAGGTCTTGGACACCCAGTTCTTAGGAGTGATTCCCTAGGAAAAGGTGCCTTTGTACCTAATGACATAACTATTGGTGGTCCAGATCAGGCCTCCTTTATTCTTCTTACAGGTCCT
Unigene0047244	493	C	*	A	ATGACAATGAGGTAAACTTCTAACAGTCTCTCCAAGCTGGAAGTCCTGGAGACAAACCGAACAAGAAACTTTCTCCCCTGATGCATCGACATTGTCGGTGGTGATTTTGATTTTTGGGATTTTCGCAACGGAATCTCCGGATAACCCTTT(A/C)GAACCACCAATGTCAAAGAGGTTTTGAACTTCATCAAAGCTGGTTTCAACAGCACCCATCTGACTTTGAACAGCACTCAACATTGCAGGACCAATCCTCTCGCGCACGAGTCTTCCACTCAACAAGCTAGCAATAACATCAATCAAATAT
Unigene0047275	1217	G	*	A	GAAGGAGAAAGGATCCATGAAGAATTTCTAACAGATGATCTTGAACTTACACTTGGTAACTCAAAGACCAGGTGAAGTCTTTATAAAAAGGAATGTCTTAACTTGTGTTGTAAACCACCCGGAGTCCAGCGCAAGCGGTTGGCATGCAGC(A/G)TGTTGTAAACTCCGAGATACCGAGTTCGATAAAAACCTAGTTACCTATCATTTAACTTGAGTTGATTTTGCTAAGAAATGTTTGAGGAAATGGAGGTGAGTGGAAGAAGCTTTTACATTTTTTTCTTTTCTTTTTCCTGTAATTTTTCAC
Unigene0047342	595	G	*	A	TCCGAGAACTCGAGTCACACCATACATATGGTGTAAGCCACAAACTAACTCCCTTATCACAGTGTTGAGTCCAGGGCATAGTCCTCCACATGTAACAATAGCAGCTTGAACTTCATCTGATTCAAAGTACACCTTCTGGCGCGGTCCAGC(A/G)CGACGAAAATGTGTCCCTCGTGGACTGTCTTTGTGAACAACAACCTTCTGAGGAACTGTGTCATCAACATGCACAAAGTATTGCTTAACAACTGAATAAGCAGGATTGTCTTGCAAAGGATTATGATATGTTGGAAGATCAGGAATGTAA
Unigene0047444	153	G	*	A	AACCATTTGATTATATAAGAGTAAATTATATGATTACAGAAGCATTACTACTAGAATTCCAGGAAACTAACTCCAAAATTTGAATGCTCTGATAACAGCCTAGATGCTAGCCAAGTGAAACATAAAAATGTTATAAGAAATTAATAACAT(A/G)TCCACAAAAGCAATAGAATCTTACATTGCAGATTATTCATTCGAGATGTATTAGCGAATTGTATAGTTTGATGCTGAAGCTTGCAATGTTGATCTCAAATTTGTATACTCTAATTCATAATCAAACCCAAATAAATTCTAGTTAGTTATT
Unigene0047444	473	T	*	A	TCTTCTCTATGAGAATCAAATTCAAATTGTTTGCTACTTCATTCAATCCAATGTTTGTAAAAGCATCCATAATCCTTTTACAAGCATTTGTATCAAAATCTGTGGTAGTCGATTGTTTCCATTGATCAATAACTTCACCTGCTTCTTTTG(A/T)GTGATCAAGAATCAGATATGCAGAAAGAATGCAGATATAATTCCTGCTAATCATTTTTTGTTTCGTCATTCTCAATGAATTCCATATATGATCAAGTTTATCCTTATTTCCCATCGCGCCATAAAGAATGATCAAGAAATCATATGTTAT
Unigene0047444	591	G	*	A	CCATTGATCAATAACTTCACCTGCTTCTTTTGTGTGATCAAGAATCAGATATGCAGAAAGAATGCAGATATAATTCCTGCTAATCATTTTTTGTTTCGTCATTCTCAATGAATTCCATATATGATCAAGTTTATCCTTATTTCCCATCGC(A/G)CCATAAAGAATGATCAAGAAATCATATGTTATCCATTGACTTTGCGTGATCTGTTTCTCGGTCTCGACAAGTGGGTTTGAACTTGCACTATCAAGATGACCCGCGGTAACATATATGTTGGCCAAGTTCAAATATCGAATCCAACTTTCA
Unigene0047444	1392	G	*	A	ATCACGAAGCTGAGAAACAGGAATAGAATTCCCTTGTAGAACCCATTTCTGAAGAACATTGGTAGCACTTCGTTTGGGGAGTCTCAGCCGCAAGATTCTGCTTCTTAGATCATCATCATCAACCTCCGCAGTGGTTGACGTCTCTTCGTC(A/G)TAATCATTACTCACAGCACCGGAAGTTACAAATCTTGCTGAACGATGATTGTGATAACCATTGTTGATTAAAGCGTTGTTGTTTCTTTGTTTGATGAGAGAGAGAAGAGAACGGAACGCCATTGACGGCGGTTGTAACTTGCTCAGTTTG
Unigene0047500	76	G	*	A	NNNNNNNNNNNNNNNNNNNNNNNNNNNNNNNNNNNNNNNNNNNNNNNNNNNNNNNNNNNNNNNNNNNNNNNNNNNTGCATTACTTATTCAAACAAAAGCATAAAGCCGCAGCCTTATGATTGAAGTTATATCTAGTACAAGAACAAGACA(A/G)ACTCAGAAGCTCCACATAAAGGACAAATATAAGAAGACAACACACTGAATGCATAAAATAATCAGTCTAGAAAAGCAATATTAATCAATATTCATCTCCTTCATCACCATCTTCACCTTCAGTGGCCTCTGCACCAACTTCCTCATAATC
Unigene0047546	502	C	*	A	ATCCCGGCGGCGGATTCCCGACGAAGAAGTTCCCGTCCAAGAACAACTTCTTAATTGACTTGATCTGTCCGTACTCCAATGGTATGTTGCCGCGTAACGAGTTATACCGAATCGACAAAAACGACAGCAAAGGATATGCAGCTAGATTCG(A/C)GGGCGCGTAACCTTGGATTCTGTTAAATCCGAGGTTCAATGCCACAAGGTTGCTTCCTCCACCGTGAGCTGGTTTTGAGATCTGAATCCCGGTGAAGCTGTTGTTGGCTAAATTCACTTGCTGCAGAGAGGGTAGAAGCAAGAACCATGA
Unigene0047567	440	G	*	A	TGCAAAAAATATTTCATATTTAAATCCGGAGAATGATTTTTATTTCTTGATTAAAGCATTCGCAGCTGGTGTGATTTTAGCGACCGGGTTCATACACATACTTCCTGATGCTTTCGAGGCCTTATCGAGTCCTTGTATAGGCAAAAAGCC(A/G)TGGAAAATGTTTCCTTTCTCGAGTTTTGTTACGATGGTGACCGCCATTGGAACATTGATTATGGAAGCTTTGATTATGGGATATAAAGAAAGATCTGAAATGAAAAAATCTCAACCATTGAATGAAGATGATGAAGCTCATGAAGCTAAT
Unigene0047632	96	C	*	A	NNNNNNNNNNNNNNNNNNNNNNNNNNNNNNNNNNNNNNNNNNNNNNNNNNNNNNNTTTTTCCTCAAAATTGTGTTCAAGAAAAATAAATAGAAAAAAAGAGTAGTTGTCTTGCCTACTCGCCGGGTACAGTCTTACGACTCACGCCTATT(A/C)GGAACCAACCAGCCAAGCCACTACACCGTATTGCTCTCACCAGAATCTCAAATTTTCTCAAAACTTTCTCTCGTTTTCCCGAGAAATTCCATGCGCCCAAATTTTTGAACTGAAGCTAGTGTTCATACCTTGTCTTACACGTTCAATCAA
Unigene0047667	1923	G	*	A	TGTAATACAAGATATTTGTTTTAGTCACTACAGTCAGTGGGTTGCCATCATTTCCTCCAAGGGAACTTGTCATATTTTTGTCCTTTCTCCTTTTGGTGGTGAGACTGTCCTTAAGCTACACAATCAGGATACAGAAGGACCCGCTCTTTT(A/G)CCGGTTTTTCCTCTACCATGGTGGTTCACTCCAAATTTTACTGTAAACCAGCATCAACAGCTTTGCCATATACCCCCCCAACCTCCTGCTCTTCTTTCTGTGGTTAGCAGAATAAAAAATGTTAATGCCGGATGGCTCAATACGGTTAGT
Unigene0047667	2169	G	*	A	TTCTGTGGTTAGCAGAATAAAAAATGTTAATGCCGGATGGCTCAATACGGTTAGTAATGCTGCATCTTCTGCAGCAGGGAAAGTCTCAGTTCCATCTGGTGCTGTTTCTGCTGTCTTTCATAGTTCTGTTTCTCCTGATTCACACAACGC(A/G)TACGCAAAAGTTCATGTAATGGAACACTTACTGGTTTATACCCCTTCTGGTCACTTAATTCAATATAACCTACTACCGTCATTGATGGCAGAGCCAAATGAAACTGCTTCAAGAACAGCCCAAGTTCCTTTACCACAGATACAAGAAGAA
Unigene0047728	1088	G	*	A	AAGAAATGTGGTTCCTATAGTCCCGTTGATGTTGTTTCTATTGTGTTCAATGGTATCATCTTTTTGATGATCAATAATATGTAGGATTCTATTTGATAAATAATTTGAATGTACTATAATATGTATTTTGCATATGGAAGAAAAGTCAAG(A/G)AAATAATTTGAATTGTATGTTGGTGTGAATAAATAGAGGAGAACAATGTTATCCCTAGAGTTTTATAGTGAAAGTGTTACGGAAGNNNNNNNNNNNNNNNNNNNNNNNNNNNNNNNNNNNNNNNNNNNNNNNNNNNNNNNNNNNNNNNNN
Unigene0047747	1352	T	*	A	TCCGCGATGTTGTCCAAGCTCACTGGCGAACGTGATGAAAAGATGTTGGGATGCTAATCCTGATAAGAGGCCAGAGATGGATGAAGTTGTCATCATGTTGGAAGCTATCGACACTTCAAAAGGCGGAGGTATGATCCCTCTTGATCAGCC(A/T)CAAAGTTGTTTATGTTTCCGCAAGTATAGAGGACCTTGAAAGATTTTCCACTCTCAAGCAAGCAATAGAGAATCAAGAATCAAGAATCAAGATGGAATACACAAAAAAAATGAGTGAAAGGCATAGTTAATGAAGAGCTCTACCATTACT
Unigene0047775	143	G	*	A	NNNNNNNNTTATCCATTTTTTTACTCAATTGACCACTGAGCGTGTTTGCCTAACCAGTTGAGTTAACTCACTCAAGTTTGGCCGCAACGACAAGAGAAGGGGCAAAACACAACCACCTCCGTTCAACACCGACGAAGCACCGTTGCAACC(A/G)CAAGAACAATTAACAGAATGTTTCTTAGAAGAATTGGTGCTGCATTTCCTCCATCAAAAAGGATCTTCAGCTCTTCTGTTATCCATGACTATGCAAGTTCCATTCAAGAACTCAATAAGGAAATGGAAACTGTATTTGGGGAACTTCCGC
Unigene0047777	585	G	*	A	GTCGTCTGGAATGTCAAGACGGCGATATTGGAAACCCACGGCACCAACAACTTGCATGGAATTCATTCCTCTCCAAGGCTGCTGCAAAGTAGATAGCTCCCATAATATGATCCCAAAGCTATAGACATCACACTTTTCATTTGACGGTTC(A/G)TTTCTCAACATTTCAGGAGCCATCCACTCGGCCGTGCCTGCAGTTGATCTGGAAGAAAGGAATGTGCTATGTTTCATACGTGATAAGCCAAAATCACACACCTTTACAACCCAATTTTTATCAACAAGAAGATTTGGAGACTTCAAATCG
Unigene0047822	3067	G	*	A	TCATTTTTTTCTTCAATTATAACCTAAGTAGTGAAGGAACATTATTTATATGTAGTTTGCTGCATTTTTTTAGTCTTGTAGAGGTAGATAAGCAGCTAGCTAGAATTCGATTCATAAAGTTCTCTATATATAAGTGTGTAAATTCGTTGC(A/G)TTCACTTCGATGTAAAGTGAAGTCATGGTGTTAGATATAATAGAATCAAAGAAATCATCAAATTATGATGATTATTGTAACACATAATAAACTCTTTGATTTATTCAAATCCAAATATTTTACTTCTAAAAAGNNNNNNNNNNNNNNNNN
Unigene0047895	740	G	*	A	TGACGGAAAACTGCAATCTGTTGCAACTCAAAACACTCTCCGATGCCTCTCTCGCATGCTTGACGAAGCTATACACGCTGATCTCACCATTATAACTGCAGACGGTACGCTTAAGGCTCATAAGGCAGTTATGACTGCAACTTCTCCTGT(A/G)TTCGAGGCCTCATATCATGACAGCGACAGTGAGGAAGAGTCATCTACAATCCACATAGAAAACATGTCACAAGAATCTTGCGCAGCCCTTCTGAGTTACATGTACGGAACAATAAAACCTGAAGATTTCTGGAAGCACAGGCTTGCATTG
Unigene0047898	2808	C	*	A	CAGCAACCGTCTGAACAACAGGTTCGGAAACTGGACTTACTTCACATACCGAAGGCCTAACACCAGAAGACAAACATGGTTCAACCCCTCCTTGGTTGCTCAGTTCTGTGTTGCCGGCTGGTATAAGTTCCCCAGAAACAGAATTGGGTG(A/C)TTCAGAAATCATCTTTGCAGGACCTTCTGATTCTAAGTGCTCACTTATATTCCTGTGTTCACTTGAGTTTCCATCAGCAAGCAGATAAAACATTTCATGGGCAACTAGTTCAGAATTACTGTTTTCACCATCCAAAGATGATTCATTGGC
Unigene0047908	422	G	*	A	AGAATGCAACGGCGCTGGATACACGCACACACAATCCAGCTTTCCATCTCTTATGGTGTCAAAAATAGCCATAGACGGTCCCAAACCATGAACCGAAGCACACCCCATGTAGTCATCAACCCCATCCTCTCGTTGCATCTCGCCACCGTC(A/G)TCAACCACCGTGTCCTCGAACACCGACATTATCGATGTTCTTGACGATGATGTCAAACCAGGATTCTCTATGGCCTTGCACATGNNNNNNNNNNNNNNNNNNNNNNNNNNNNNNNNNNNNNNNNNNNNNNNNNNNNNNNNNNNNNNNNNN
Unigene0047964	49	G	*	A	NNNNNNNNNNNNNNNNNNNNNNNNNNNNNNNNNNNNNNNNNNNNNNNNNNNNNNNNNNNNNNNNNNNNNNNNNNNNNNNNNNNNNNNNNNNNNNNNNNNNNNATATTCTGGTGCTGCGTAACCATAGGTTCCCATTACTCGAGTAGACAC(A/G)TGGGTTTTATCACCTTCTGGACCATCTTTGGCAAGACCAAAGTCCGAGAGCTTCGCATTGTAGTCCGCATCTAATAGTATATTTGATGTTTTAAAGTCCCTATATATTACTGGCCGTTCAGCTTCCTCGTGAAGAAAAGCAAGACCCTGC
Unigene0048079	97	G	*	A	NNNNNNNNNNNNNNNNNNNNNNNNNNNNNNNNNNNNNNNNNNNNNNNNNNNNNNTAATCATTAGTCACAAACTTATAGTAGAACATAATAAATTAGGAGTAATTAAAATTTTAGAAAAAATAATTGTGAGTTGAAGATCAATAGCCACCC(A/G)TCATCCTTAGTTACATATTGTAAAAGTACAACTCATAATTTAAACAAGAATATATAAATGAAAACACCAAGGATAGAAAAAAAACAATTAATAATGCCATTTTTTTAGGGGATGATTTGATTTGATTTGATTATCCTGAGTAGATATGGA
Unigene0048121	412	G	*	A	GAATAGTTTGGAACTGGTAGAGCCTAAAGGTTCCAGAGAGGATAAAGAAAAGAACAAGAGGAAGAAAAAAGCTAAATCTATAGAGTCTCTAGGGATGGAAAAGAAGGTGGAGGATCACAATGCGGTTTCGAAATTTAAGATATCCGAGCC(A/G)TTGAGAGAAAAGTTAAAGGAAAAGGGAATTGAGTCATTGTTTCCTATTCAGGCAATGACTTTTGATACCATTCTTCATGGTTTTGATTTGGTTGGTAGAGCTCGCACTGGTCAGGGTAAAACTCTTGCCTTTGTATTGCCAATAATAGAA
Unigene0048155	58	T	*	A	NNNNNNNNNNNNNNNNNNNNNNNNNNNNNNNNNNNNNNNNNNNNNNNNNNNNNNNNNNNNNNNNNNNNNNNNNNNNNNNNNNNNNNNNNNNNNGAGGGTGGTAGTTTCATCAATCTCTTCTTCAGCCTTATCTGTTGTACGGCCATGTGA(A/T)GATCCCTTCAAGTCAAATCTTCTATGGATTGGATATTCTGAGCAGAAAAGATTGCCCATCACAATGAACCGAGTCTTCGGGCCTCCAATTGGCTTTACACAGTGTACCCCATAGAACTTTGTCACAAGTGAATTCTCATACTGAGAAACA
Unigene0048259	471	T	*	A	CGACACAACAACCTCCGCCGCTGGATTCCACCTCGATTCCGCTGCACTCCGGCGTCTCACCGGAAAACCAATCCCGCTTCGTTTCTCTGTTTATGCCGGAAGCAATGGAACAACCTGCGGTATTAAAAGTTCGAAGCTATTAGGTCGGGC(A/T)GTTGTTAACATGGATGTTAAAAACTCTCTGTCTCGTTCTGTTATGTTTCATAGTGGGTGGCTTGAGTTGGGAAAGAAAAAGAAGAAGAAAGGAGTTGAACCGGAATTGAAAGATTCGGCTCGGCTTCATTTGGTGGTTCGGTCTGAACCG
Unigene0048491	45	G	*	A	NNNNNNNNNNNNNNNNNNNNNNNNNNNNNNNNNNNNNNNNNNNNNNNNNNNNNNNNNNNNNNNNNNNNNNNNNNNNNNNNNNNNNNNNNNNNNNNNNNNNNNNNNNATAGCTCCTTCTACGTCAAAACGATCCAGCTTCTGAACCTCCAG(A/G)AGCTGATTAAGAACTCCTGATTTTTGCACAGCTTCAGTAACAAGAGTAAATAAGTTCTCTGTACATTGTCCATCGCCAGCTTGAATGACCGAGTGAAGTTCGTCTTCAAGTACTTTGGCCATACATGCATCTGTACTTTCAGCACCACCT
Unigene0048521	205	G	*	A	CAAGACTTCATTCAGATCAGATGCATACAAGTAAGGACCAACAGGCATACCAAGAACCCCTGGACCACCATGATCAGTGTAGTATACAAAAATATGATCATTGGGACCACTATCCACAACTTTCCCACTCCCACCTGTAAGAGCTGATTT(A/G)TTTCCAAGTAAAGCAGCATAAAAATTGTCGGCATGTACATCTGCACCAGTATAATCCTTCGGAACTCCTTCATAAACATCATCACCATCAGGTTTGTTAATTATGACACCAGGCCTTGGATTCTCTTCATTGGAAGCAATATCATCATAC
Unigene0048616	452	C	*	A	AGAACCCATTATAATCTCCGACCAAAGTTCTACATCACCACCTTTACTGCAAAACACTTGATTCCCTTGTGTTTCAATTTTGTAACCAAACCCTTCTTTTTTACCATTCAGCACTTTTCTCTTATCACCTAAACAAACCCATGAGCTTTT(A/C)TCAGAACCCAAATTCTTCAAATCCATATAAGAAACTTCACCGGAATTCACACCGACTTTAAACATAGCAGACAAAGAATCAGAAACTGTTACATCTGCAAAACAATCAACTTTCTCGGAAACTTCCCATACAACCTCGCCGGAACGAACG
Unigene0048616	1250	G	*	A	GGTGGTTGCGATGGAAGAAGGAGAGTCTCTCCCATTTAACCCTAACTGAAGCGATTTCTGAAGATTGAAAGGCTCTAACTGAGAGGGGTTGGAGAAGGAATTGACGAGGAGATTTTCGATGCCGTAGAATCGGGACTCGATGATGAGGTC(A/G)TGGAGGTCGAAGGATTTGGCTTTGGAGGGAAGGTTACCGGTGCGGAGGAGAGAGAGGAAGAGAGAGAAAATTTCAGGGTCTCGGTCGATGAAAGGTGTGAAAGGGGAATCGGTTTGGGAGATTCTAGAGAAGAAGGTTTTGGGACCTGCT
Unigene0048715	68	G	*	A	NNNNNNNNNNNNNNNNNNNNNNNNNNNNNNNNNNNNNNNNNNNNNNNNNNNNNNNNNNNNNNNNNNNNNNNNNNNNNNNNNNNAGCCAATCCACCCTTTTGGAGCATGGCGAAATGAAGCAACTAAAAAAGAAATTGAGAGACCAAACAA(A/G)CATTTTGAAGGTATAGTATGGCCTCGTAAAACAACCATTAAAAAACTTGAAAAAGTAAGTCAAACTTCTATAACTCGCACATTAGATGAAAAAGAGACATACATTCTTCGTGATTATTGTGAGAAACCATCCGCAATAGGGGAAGATAGA
Unigene0048799	286	C	*	A	TTGATCAAACAAATAAAACAAATCCTTTATTCACAAAGCTACATTACATAATAACCCCACCTCATTAACTAATCACTATTTCCCAAACATCTAATTTCCTTTCTCATTTTTCACATTTTGTTTTTCCTGTTTTCTCTCCCGCATTTTTGT(A/C)TTCTCAAGAGTCACATCTTGCTACATTTTCTACCTATCATCTTTTTCCTTGATTCCAAAAATGTGTAGGTAAGTGCCACAAAAAGAAAGGGTAGTGCTATGCACACACGTCTTCGGATAATTACAAATTGCATTGAACAAACACAACACA
Unigene0048915	222	C	*	A	ATGACTTAATTGAAAAGTATCAATCCAATCACAATTTCTCTTTTCATTTCTTCATCAAGAATTTTCTATCTACCTAGCATTCACTATGTATATACGAGGACTGGAAAGCATGTTGACAATTTTCCAGTATCATCTTCCAAGTTATCTGAG(A/C)TTATGGTATTAAGTTATGACAAGTTTTATCATTATCACATGGATACGGACGGTCTATTTGCTTGCTTCTGTTTCTACTAAAATACCAATCACCAACTGCTTCTGCAATAGTCTTTTTGTTTATTCTAGGAGAATCGTCTCCAAACCATGT
Unigene0049095	42	G	*	A	NNNNNNNNNNNNNNNNNNNNNNNNNNNNNNNNNNNNNNNNNNNNNNNNNNNNNNNNNNNNNNNNNNNNNNNNNNNNNNNNNNNNNNNNNNNNNNNNNNNNNNNNNNNNNTTTTTTTAAATTAACATTGGATCATGTATCTTATTCACACT(A/G)TAAATTCTTGCCGATCTACAAAGTGGAACTTATGAAATCAAAATACAAAGCTTAAGAATATCAGAAACATTTATATAAAACACTGCAGAATATGAATTCCTCTAGCTTCTTGTCTTTGCACATAACTAAGTTGAGGATGTCCAACCGAAA
Unigene0049359	516	T	*	A	AACATCAACATCTTTGTGAGTGCTAAGAAACCTTTCGGGTTTGAACTCTAATGGATCGGGCCAAACATTAGGATCTCTATGGATCTTCCATAAATTCGGCATCAATCGAGTACCCTTTTTGATATGATATCCACCTATTGTGCAATCTTC(A/T)GTGAATTCGCGAGGTGATGAAAATGGAGCTGGTGGATACAATCTCAACGTCTCTTTTATTATAGCATGAAGATATACTAATTTATTGATATCTGACTCTTTCACACATCTTTCTTTTCCAATATATGTGTTAAGTTCTTCTTTTAATTTT
Unigene0049391	617	G	*	A	TGGATGAATTACCGTTACACCGATCAACAAGAAGTATCCATGCCTATGCTTACCCAAGGAGTACTCAAGCTAGAACAAGAAGACAACAACAAAATGAATGATTTGTCTCATTTGTATTATCAGAACCAAGTACAAGGAGGTCCAAGTCAC(A/G)TGTCAATGGAATCTCAATCCACAACTAGAAACGTGAACAATGGTTATAATTCTGCACCTCCCAACATTGTTGAAATTAAGAAACTGTTCAAGCAAGGAAACCATGCAGGAAATATGAATGAAGATCAACTAAGCTTAACTAGAGATTTCC
Unigene0049558	802	T	*	A	AAGGTTCTTCTTTCCAACTTTGCACCAACCAGCTCCTTGGCAATTGAATACTCCAACAACTCCAGAATAATCATTCATGTTCCATATCTTTAGAAGACTCTTTCCGTCTCTAGCAGGATCAGCAAATAAGCAATCTTTGGTTGGTCTTCC(A/T)GGAAGTTTAGCTCTTAGGATAGAACCATCAGGAAGTACAAGCTTCTTCAGAAGATTAAAATCATGGTGCCGAGGCTTGTCACTGACATATATAGGACAGCCTCCAATAGCTCTTGCAGCAGCATGATATTCAGCCATTGGATGTAGGCTA
Unigene0049598	292	T	*	A	TCTATACTATCAGCTCTCTTTTCGCCTTTCTGTTTCTGCTGTGATTCCAAATCCCATGTTTGATCTCGATTCTTCTCTCCGCTTCAATATAATAGGATACCTCTTCTGTGTCCTAGTAGTTGGGAAAAACACCAACTTATCTTCTTCAGC(A/T)GGAACCCAACTGAAGCGCGTGACAAAGCGGTGAAGAAAAACCGAAAGAACAACTCTGGCAAGTTCATAGCCCGGGCACAACCTTGGTCCTCCTCCAAATGGTGTAAATACATTCCCAGGAGTCGCTACAGCTTCTGAGTTATTATTACTC
Unigene0049612	226	G	*	A	ACAGGAATATGTCAGAACAGCACAGGAAAGTGGAAAAGCTCTGGTGTCACTTATAAATGAGGTTTTGGATCAGGCAAAGATTGAATTTGGTAAGCTTGAACTTGAGGCAGTGCTTTTTGACATACGCTCGATTTTGGACGATGTATTGTC(A/G)CTATTTTCTGATAAGTCCCAAGGAAAAGGAGTTGAGTTGGCAGCTTATGTTTCAGATCATGTTCCTAAACTACTAATAGGCGACCCGGGAAGGTTTCGCCAAATCATTACTAATCTAATGGGAAACTCAATTAAGTTCACCGACAAAGGA
Unigene0049712	629	G	*	A	TGTTTGTTGCCATAAATTGTCATGCCCTCATGGAGACTTGGATTTCCCTAAAGCAAGAGCTTCTCACTCTCTCAACTTTGTTTCTGATTGTCTTGTTTTGTTTGGTGGTGGCTCTGATGGAGGCCGACATCTTGATGACACGTGGGTGGC(A/G)TACATTGGTAATGATTTCCAGAAAATATTGAAATGGAAGACAGTTCATTCAGGCATTCCAAGTGGAAGATTTGGTCATACATGTGTGGAAATGGGTGATTTCCTTGTTCTCTTTGGAGGCATCAATGATCATGGAAACCGTCAAAATGAT
Unigene0049744	395	C	*	A	TCACTTAGAGGAGAGTTGCATCAAGTAAGAGATGATAGAGACCGACGATTATCTCAAGCACAAACTTTAAATGCTGATTTGATGAGATTAAAAGAATCTAGGGAAAACTCCTGCGTTGAATTGGACAGTTTGACATTAAAAGCAAATGAT(A/C)TGGAGGAAAAAAGTTCTTTGAAAGAGAATCAAATAAAGGCATTGCAAGAACAGTTAGCAACTGCAGAGAAGAAACTGCAGGTGTCTGATATATCTGTATTCGAGACAAGGACGGAATTTGTAGGGCAACAAAAATTTGTTGATGAGTTGC
Unigene0049848	985	G	*	A	CACCCTCACCACATCGTGATAAGATGATCTTCTTATCTGAATGACTTGATGATCTTTGTGTCTTGAAGAACGGCAATAAAAGCAGAAGGCGCCGTCGCCATTGTTGCAGTCTAAACAATACATGTTACACTCATTCCGAGCTGCATCCGC(A/G)TGAATCCGGCACATGTTGAAAAACAGTGTTTTCAGCAATGGCTCCAGCCATGGTGGCACCAAAACTGTGTCCATTGTGTGTATAGTGGTTGATAATGTGGGTTTCAATGTGGATTCAAAGAAGATGGTTTTGAGGTTTTGAGATTGGGAG
Unigene0049892	201	C	*	A	CGAGAAGGCCCTTGTTTACTACGAAAAATCAGCCGATTTTTATGAAAGTGAGGAGGTGACAACATCTGCAAACCAGTGCAAGCAAAAAGTTGCTCAATTTTCTGCTCAGCTAGAACAATATCAGAAATCGATTGAAATTTATGAAGGGAT(A/C)GCTCGCCAGTCTCTCAACAATAACTTGTTGAAGTATGGAGTTAAAGGACATCTTCTTAACGCTGGGATCTGCGAACTTTGTAAAGGAGATGTTGTTGCTANNNNNNNNNNNNNNNNNNNNNNNNNNNNNNNNNNNNNNNNNNNNNNNNNN
Unigene0050097	111	G	*	A	NNNNNNNNNNNNNNNNNNNNNNNNNNNNNNNNNNNNNNNNAAGGTTAGAGTGAGAGATGGGTCACTCCCACCCACTCATTTTCTCAATCATAACAACACCAATCCCTTCCCATTCCACCCCCACTCTCATCTTCCTCACGCGCACACTTG(A/G)TTCTATTTTTCCTATAATCAATCTTTTCATAACCCACTTATAATCATAATTTCACTCTCTACTTATTTTCCCCGACCAGTCTAGTCCCATCCTAACCATTCACATTTTCATTTTGAACAATTTCTTTCCTCTCTGATNNNNNNNNNNNNN
Unigene0050555	156	G	*	A	ATACTATTATATAGGTAACTGGGTTGGTGTCCTGTGTTATTGACATTATCGATACAAATATTAGCGTCTGTCCCGATGTCCGTGTTTATGCTTACTAGATACAAAGTTAATGCAAAACCTCTTCCTATAAACATGAGAAGCAAACCTTAT(A/G)TAACCTAAAAAGAATACCCTCTTTACTTTTAAGTCATTTTGCCTCTTTCTTTTTAACATCAGTTTCAGCAACCTCAGTGATTATAGTAAATGTTTTTTCCATAGGGAGCTCACTATATGTTGTCAAAGGCTCCAATGAATCAACAATGTC
Unigene0050556	51	C	*	A	NNNNNNNNNNNNNNNNNNNNNNNNNNNNNNNNNNNNNNNNNNNNNNNNNNNNNNNNNNNNNNNNNNNNNNNNNNNNNNNNNNNNNNNNNNNNNNNNNNNNGCGTGTAAGTTAAGTTATCTGACCTGTAAAATGAAAAGTTGTTATAATAA(A/C)TTGTAAGTTAAGTTTAACTTGAAATTTTGAAATCATTGATATCTCTTGTGATAGCAGGAATGCAACTTGAACTTCTAGCAAGTCCACCTTTCTTTTCACCACCACCACCTTTCTCTCTAGGGTTGAATGACTTAGCCCTTCTACCTTCCA
Unigene0050822	327	G	*	A	GATTAAACAAACCACCAAAAAGATGACACAACTCTGCCGGAAAATCGTTCAGGTCGACGTTCGATACGGCGTTCTTCAAAGGGTTTCTTTTGTTGGTCAGTTCTTTCGATTCATTTGGAATAAACTCATGCTTTGCTCTCTTGGAGGCTC(A/G)CCACCTCAATACACAAGGTTACCTCTCCGTGGTTCATCCTCTTCGCCGCCGTCTCCGGCCACCGTTGACGACGGTTTCTCTCATGAACAACAACATATCTCAAATGGGTATGAGTCGGATTCTGATTTGGTTAACCTCAAGATTAGTTTG
Unigene0051070	213	T	*	A	AGATTCGTCCCCCGATTTGCATGAGCTTCTTCCCATCTAGGTAGAATGTTCGGATTTGGACATGTTGCACGCGTCACACAAAATTATCGTTGTCAGCCATCCAATTTCAAATCCACTGTCATAATCATTTTTAAACTGATTATGATATTG(A/T)GAAATCTGAATTGTTCCATCTCAGATTATAGGCAAAAATCTTGGTCCAAAGTTCACACAGTAATATTCACTTATAGAGATTAGAGGAATTAGATGTAGTAAAATTATTCTACCTAAGGTAATTATGGTCATAATGTTATAGGAGGCTTGC
Unigene0051110	178	G	*	A	ATCTTCCATTTTAAATAATTTTAGTCTTTGCTGTTCAAATTCGGATACAATGAACTGAGCAATGTCAGATGAGACGATGTAACCCGGGCCGTTAGCATAGGGAGGATACTCTTCCTCTATCCATTCCTCGTAGGTTACAGCCCATTTCCC(A/G)TCGCGAAGAGGCCTGTGGTGGTAATTCATATTTCCCATATAAAGGCTTTCATCACTTTCAAATTCTCTTGTCTCGCTTATGATAGAATCCACTCTAACAAATGTGTCATCGTCGCACTTCATGATATGCTTGGCAGCTACGGTGCGAATC
Unigene0051939	293	G	*	A	AAAAGCCATGAGTTCACAAAGCCATGGACTTTGAAGAATTTCCTTATGCATACTTTGTACCTGTGACTTAAACAATTGACCTTGTTTCGAATAATGAACCTTATCATATTTCTTTAGAATTTTTCGAATTGCGGTGGCGTTGATGAGTGC(A/G)TAAGTAACAAGATCTTCACCTTCTTGAATAAGAGCAGTGTGATTCTTATGAAATTTCCCTTTGAACCATAAAAGATACTTTCTGAAACCAGAAGCAAGATGAAGCTCAAGCAATTTCTGTGCACGTTGATTAAAGCATCCAACTATCTCA
Unigene0052198	249	G	*	A	TATCAAGAAAATTCTCAAGGCCATCAAGAAGATTGAAGATATCGAGACATACAACGTGGACAAACAATTGAACAAGGTTATTGTTACGGGCAATGTTACCAATGAAGAAGTGATTGGAGTTCTTCAAAAGGCTGGCAAGAATGCAACTGT(A/G)TGGGAAAATGTTCAATGTTGAAACCATAATTTCTTTTTTAAGCTTTCTTTATCATATAAGAAACATATAGAACTATGCATGATGTGAAGTTCTATCATCTATTTAGAGTTTGTAGAGGCATGGTTATATATCTACTCTATTCAGTTTTGT
Unigene0052805	414	G	*	A	TAACCAAGTAACCAAACTAAATCAAGTGGGCGAACGGCCTCCGCCACCACTGCTTCTAGAGTTCTATCTCTATTCTACTAAATAAAGTTTTATGTGAGTTGCACTTCAGAGACTCATCAGAATCAAAACAGGTCTAACAAAGACACTTAC(A/G)CATGTCTTAAGGTCTTTAGGTTTAAAGTGAAACGGGAGAAAACATTACTTTAAAAAATAATGTATCCCTCTTGTATAGTCTAAATAGATAGTGCTAGTGTATATATAATTATATATATTAACCATAGTAGTTGTATTGTATTGCATCACC
Unigene0052967	1114	G	*	A	CTGAGCGTTGGTTCCCATATCAGGAGCAGGGACATCTCTTTGAACGCCAATGAGATCGTGAATCTTTTGGGTGAAAACCCGAGTTAGACGTTCTAACTCACTGATGCTTAGATCCCTCGGGTTGCAACCAATACCACCCTTAGCACCTCC(A/G)TACGGAATGTCAGCTACAGCTGTCTTCCATGTCATGAGTTGAGCTAGAGCATTCACTTCATCAGGTTCAACCTCAGGATGATAACGAATCCCTCCCTTCATAGGACCACGAGCATTGNNNNNNNNNNNNNNNNNNNNNNNNNNNNNNNNN
Unigene0053135	1329	G	*	A	TATGAAGACAAATGGGTGCAAACCGAATGCCATAACGTATCGACATCTTGCTCTAGGCTGCTTGAAATCTGGTAAGGCAGAGCAAGCTTTGAAGACATTAGAATTGGGCATGCGCCAAACCGTAAACAAGAAGGTCAGAAATTCAACACC(A/G)TGGTTGGAGGCTACTCTTTCAATTGCTGAGCTTTTTGCTGAAAAAGGGGATGTTGAAAATGTTGAGAGATTGTTTGAAGAGTTTCATAAGGCTAAGTACTGTAGGTATACTTTTGTATATAATACCTTGATTAAGGCTTATGTAAAAGCT
Unigene0053135	1360	C	*	A	ATAACGTATCGACATCTTGCTCTAGGCTGCTTGAAATCTGGTAAGGCAGAGCAAGCTTTGAAGACATTAGAATTGGGCATGCGCCAAACCGTAAACAAGAAGGTCAGAAATTCAACACCGTGGTTGGAGGCTACTCTTTCAATTGCTGAG(A/C)TTTTTGCTGAAAAAGGGGATGTTGAAAATGTTGAGAGATTGTTTGAAGAGTTTCATAAGGCTAAGTACTGTAGGTATACTTTTGTATATAATACCTTGATTAAGGCTTATGTAAAAGCTAAGATTTATAATCCAAATCTTTTGAGAAGGA
Unigene0053524	1237	G	*	A	ATCCAATTTCTATGCCATGAAGGTTACAAAGATTCAAGTTTATCGGCCCTAGTTGGTTCTCGTATAAATTGCTCCTCTATACTTCCTGGACTTGGTCATGATGCTATCAACTATCCAACCATGCAACTTAGCTTGGAAAGCAAGAAAGAC(A/G)TAACGGTTTTTAGAAGAACAGTTACGAATGTAGGTCCTATTCCGATTACCTACAATGCTACTATTAGATCGCCGAAAGGAGTTGAAATCTCTGTGAAGCCTAGTTTCCTTAGTTTTGATAGAAAAATGCAGAAGAGGAGCTTTGAAGTGG
Unigene0053524	1327	T	*	A	CTTGGTCATGATGCTATCAACTATCCAACCATGCAACTTAGCTTGGAAAGCAAGAAAGACGTAACGGTTTTTAGAAGAACAGTTACGAATGTAGGTCCTATTCCGATTACCTACAATGCTACTATTAGATCGCCGAAAGGAGTTGAAATC(A/T)CTGTGAAGCCTAGTTTCCTTAGTTTTGATAGAAAAATGCAGAAGAGGAGCTTTGAAGTGGTTGTGAAAGTAAAATCTATTGCGAGTATGGAGATTCTATCAGGTTCACTTATATGGAGAAGTACACGTTACATTGTTAGAAGTCCTATAG
Unigene0054096	465	G	*	A	TGTTCCTTTGTTGTCACCAGTCCAATGAGCAGCATATTTGCCTGATCCTACGTAAGTCGAACGAGACAAAACAAATGGTCGTTTACCTTGAAGTTCATGAAGTGCTTTGTGCGTTGCAATGGCTTCGGAGAAACCAAAAAGACTATGAGC(A/G)TCATATTCCAACACGCCATTATAATGAACTGCACTAGTTGCTATCGTTTTGAAGCCTATTGGAGCCTCTTTTCCGGAAGCATTGATTTTGTAAGGTGGATCATCCCATCTTGTGCTTGTGATGTTTGTACAATCCAAGCAACACGTCGAA
Unigene0058116	632	G	*	A	ATCGATTTTATTTTGACTGAAAATATTCCTACTACTAACAGCATAATAGTGTGCCACAGTTACGTTACAAGAATTTCCATTGTTTCCGCTCTTTCTCGTCTCTTCCAACACAAGAAAACCTCTCTTGCTTCCACTCCCATAAAGATAAAC(A/G)CATGTTTGAATGACAGAACCTGCAGCATTAGTACTCTTGTTATTCTTTTGCTTACAATTTTTGAAGGCTCCATTTAGTAAGATCGCAGGTGTGGCTGAGTTAAGTAAACTTGTGTCTTTACTTACGGCAAACCAAATGTTTCCATCTGAA
Unigene0062464	462	G	*	A	AGTAGATGAGTTGAAGGAAATTAAAGGTGCAAGGTTAGCTGAATTGAACTCGAAGAAACTCGTGGCTGCTGGTTTCGAGTTTAAGTACAGTGTTGATGATATGTTTGAAGATGCGATTCAGTGTTGCAAGGAAAAAGGATATCTCTAAGT(A/G)TTGTGTTTGGAAGTTCATGATGTAATATGTTTTAGTTATGAAAAGTTGAGAAAATAATAAAATGCCTAAGATCAATGATGATGGTTTAGGAGATGTAGTATCAGGTTATGCATTAAGTTGTTTATGTTGAAGAAACTGGNNNNNNNNNNN
Unigene0067501	64	G	*	A	NNNNNNNNNNNNNNNNNNNNNNNNNNNNNNNNNNNNNNNNNNNNNNNNNNNNNNNNNNNNNNNNNNNNNNNNNNNNNNNNNNNNNNNACAAAACAAGATGGTACCTTGAAAAATGAGACAAAAAATGGAGATGATGCTAATTCAAATATA(A/G)GCAAGTCTTCTATTGTTACTAGTAATGGTGACAAGAGTGAGTCAAAACCTATAAGGAAGAAAAGGCACATTGCTTCAGCATCTACAGCATTACTTTTTGGCACAGTCCTTGGCCTTATTCAAGCTGCAACTCTTATATTTGCAGCAAAGC
Unigene0068894	264	G	*	A	GCTTTTTAATCCATCTGGTGTTTGAGCATTGAAGAATTCTAATTGTCCTACATACATGAATACCTCAGAAGCTCCTATAAGTGCATACTGAGGAATTTGCCAGAAGATACTTAGAGAGCTTGTGCCGCCTTGTTTTGCGTATTTGAGTCT(A/G)TAGCATTCGACTATTCCGGCTGAAACCATTGCTATTACGGCTATGACGAGACCGATTCCCATTCTTTGAAGCTCCGTGAGTCCTTTCGAACTTGATTTTTTGAGTTTTCCGATGAGTGGATCGAGGACTCGACGGTAGAAGAAAATGAAG
Unigene0074628	142	G	*	A	NNNNNNNNNAGATATGTCAGGTTGTGGAAATGGAGTCGCTACAGCATTGGCTATATCAAATGCCATAACTAATCTATGTGCCACTATTTTTGGCCAACTTTGGAGATTGGAGCCACTGTCATCAGAGAAGAAAGCAATGTGGCAAAGAGA(A/G)ATGGAATGGCTTCTTTGTGTTAGTGATCATATTGTTGAATTCAAGCCTAGTTGGCAAACATTTCCAGATGGAAGAAAGTTTGAGGTCATGACTTGTCGACCANNNNNNNNNNNNNNNNNNNNNNNNNNNNNNNNNNNNNNNNNNNNNNNN
Unigene0075564	245	C	*	A	CGTGCTCGGATATAAAACAGTTGGACTTATGAATACCTACGACGAGGAGACTCGACAATATTTCAAGCATTCTTCCGTTAGAGTGCTTCTTTGTCCGAGATCTGGAGGAAAAGGACATAGCTGGGTGAAACAACAGGAAGCTGGAACAAT(A/C)TATACACATCATCAGAAGACAGTGATTGTGGATGCTGATGCAGGTCAACATAAGAGAAAGATTGTAGCTTTCATTGGAGGGCTTGATTTATGTTTGGGAAGATACGATACGCCGGAACATTCTCTCTTTAGGACTTTGCAGACAACACAC
Unigene0077840	52	T	*	A	NNNNNNNNNNNNNNNNNNNNNNNNNNNNNNNNNNNNNNNNNNNNNNNNNNNNNNNNNNNNNNNNNNNNNNNNNNNNNNNNNNNNNNNNNNNNNNNNNNNAGCCAAGAATATTGGTAAAAATGTTGACAAGCTCATGTTATCCATCATAAA(A/T)GATAGGATGAATTCAAATGATAAGAAACAACATGAACAAGATTTGTTGGGTCATTTGTTGAAAGAAAATCATGAGATTGATGGAAAATTAAACAAGGCATTAACAAAAAAGGAATTGGTTGATGAGTGCAAGACATTTTTCTTTGGTGGC
Unigene0081963	1522	G	*	A	GATGAATCCGGCTTCTCGGCAGATATACTTGACTTTTCCAGCTGATAGTACTTTTAGAGAGGAAGATGTTTCAAACTACTTCAGTATTTACGGGCCGGTTCAAGATGTGAGGATTCCGTATCAGCAAAAAAGGATGTTTGGATTCGTTAC(A/G)TTTGTTTATCCTGAGACAGTGAAACTCATTTTAGCGAAAGGAAACCCTCATTTTGTTTGTGATGCGCGAGTGCTTGTTAAGCCTTACAAGGAGAAAGGCAAAGTCCCCGACAAAAAGCAGCTACAAATGGATAGGGGAGACTTTTCTCCT
Unigene0082060	218	G	*	A	AACAACTCTTATTGAAGTCTATGTTGGTTTGGCCATTGGAAGTGCTTTATGCATTCTTGTTAGAGCATTGTTACTTGTTACATTCGGCTATAAGACAGCTACTATACTCTTCAATAAAATGCACTTGGCCATTTTTCGCGCCCCGATGTC(A/G)TTTTTTGATTCTACTCCAAGTGGCCGAATCCTTAATAGAGCTTCAACTGATCAAAGTGCAGTGGATATAGACATTCCTTATCAAGTTGGCTCATTTGCCTTCTCTTTGATCCAGCTTCTAGGAATTATAATAGTGATGTCTCAGGTTGCA
Unigene0082448	1572	T	*	A	AGGGTAACGGTATTTTAAAGAAGCACGATACACTTGGGCAATACTTCCAGATGCAACAGGCAATTCTTCAAAATTCTCAAAAATTTCAGAAATTTTACGGCCAAATGCTTTTTCTATAGTTTTCTTTGTGTAGCTAAAACTGTGCTCAGG(A/T)GCTTTCGAATGAAGTTCCGCAAGCTTAGTACATAGATCTTGAGGAAATAGATCAGGCCGTGTAGCAGCCCACTGACCCCATTTTATGAATGCTGGACCTGCCCTTTCTAGTGTGCGATGAACAATCCGGAGCCACATTTTCCTGAACTCT
Unigene0082934	1345	G	*	A	ATAACAGCAGCTCCAGAAGATGCATCAATACCATATATCTTTCCTTCTCGGTATGCATTAGTACTAGCAATTTGAATATGAGGTGGAAGAGTGTAAAACCCTAGCAACCATTCCAATTTTTTTGGGTTTACATTTAATTTCTGATTCAAC(A/G)TCTTCAATACAATCTTCAAAACCGGGTTTCAACCGAATGTATCGTGGAGTGGAATCAATTGACGTGTAAATGGATGGGTCGATTCCATTGGATTCTAAGAAGTGGAGAAAAGCGTCTGGTAGTGGCGCCGTTGCAGCGCCGTGTTCCATG
Unigene0083014	447	G	*	A	TGGAAGCAAAGATGTTTCTATGGGTGCTGAAGTTGGATTCAATACAACATCTGCTTCATTCTCAAAATATAATGCCGGGATTACTTTCAATAAACCAGATTTCTCTGCAACACTTATGCTGGCTGATAAAGGAGAGGCCCTGAAGGCATC(A/G)TACATTCATTATGTGGACCGCCCAGATGGATTAACAGTGGCTGCCGAACTTGTTCACAGGTTGTCCTCCTCTGAGAACAGATTTACCATTGGGACTTCACAGTCAATAGATCCAAAAACAGTTTTGAAGACTCGATTCAGTGATGATGGC
Unigene0083155	923	G	*	A	ACCACTGATTTATGCGGTTATGGGTAGTTCACGCGATATTGCAATAGGACCAGTGGCGGTGATTTCTCTCTTGTTAGGGACTTTACTTCAGAATGAGATTGATCCTAAAACAAATCCTACAGAGTATAGAAGACTCGCTTTTACTGCCAC(A/G)TTTTTTGCTGGGATTACGCAGGCAACTCTTGGCATTTTTAGGTTAGGATTTTTGATTGATTTTCTATCACATGCTGCAATTGTTGGTTTTATGGGAGGAGCCGCCATCACAATTGCTCTTCAACAACTTAAGGGTTTCCTTGGGATTGAA
Unigene0083479	284	G	*	A	CAATTCAATGAACAAAGGGTGCACCATGTCCTCCTTCTATAGTCAAAAAACTGATTCAATAGACATCACCTGATGTTAGAAACTGCAAGACTTTGATTTGTAAATTTGAGGAGACTGTATTGTACAGTTGCCGATTGGAGTGAGGGACAC(A/G)TTTAGAAACAAACATGGGGAGGGATGAGCTTTCCTGGATTCATGATATTGTTAGGATCTAGCACTGACTTTATTTTTTTCATTGTCCTCAATGCTTCCACTCCTAGTTCTTCTTCAAGATACTTCATTTTTCCAGTGCCAACACCATGTT
Unigene0083709	109	C	*	A	NNNNNNNNNNNNNNNNNNNNNNNNNNNNNNNNNNNNNNNNNNGGAGTAATGAGAAACACACGAATTTGTTGGGACATTGAAGCTAAAGAAAACCTCATCTCTATCTCTTCTCCTCTCCACTCGTCCCTGCAACACCACCACTTCAAACTT(A/C)AAACCCAGTTTTTTTCCTCTTTTCTTTAGCAATGGCTTATATAAAATCTTGTATTTCTTATTCTGCTTTACCCTTCTTCCAACGGAGGGGTCTACCACCTGCCTCTTCTTCACCTTTTCATCACACAGTTCATTCCTCAGGAACATTCAT
Unigene0083709	715	G	*	A	CAACATATATCTTTAGAGTTTCAAACAAGGAAATGACTTATGCGCAGCAGCTTCGCGACTACGAAAGCAAAGTCATGGAGAAACGATTAGAGTCCCTGACAGAAGCAGAGCTAGAAGTATTGCTTCAAGAAGTCGAGGAAGAGAAGAGTC(A/G)TTAGCTATAGCTAGTGTGATGAAGAGGTGAATCGAAGTAGTTTGTTTGTGTATAAAGAATCAAGTTTTACAGCAGTAATTAAACAGAAATGATAATCTCTCTATATGGACTAGTTTAGAAAGGTTTCTGCTATTTTTGTTACAGTTCACT
Unigene0083709	765	G	*	A	CTTCGCGACTACGAAAGCAAAGTCATGGAGAAACGATTAGAGTCCCTGACAGAAGCAGAGCTAGAAGTATTGCTTCAAGAAGTCGAGGAAGAGAAGAGTCGTTAGCTATAGCTAGTGTGATGAAGAGGTGAATCGAAGTAGTTTGTTTGT(A/G)TATAAAGAATCAAGTTTTACAGCAGTAATTAAACAGAAATGATAATCTCTCTATATGGACTAGTTTAGAAAGGTTTCTGCTATTTTTGTTACAGTTCACTCCCTCAGACAAAAAATATAGAGAATTCCAAAAGTATAGTGTTTGGTATCT
Unigene0083709	904	T	*	A	AGTTTGTTTGTGTATAAAGAATCAAGTTTTACAGCAGTAATTAAACAGAAATGATAATCTCTCTATATGGACTAGTTTAGAAAGGTTTCTGCTATTTTTGTTACAGTTCACTCCCTCAGACAAAAAATATAGAGAATTCCAAAAGTATAG(A/T)GTTTGGTATCTTAGCAATATGTATTATTATTCGCAAAACACATACAAAAGGGACACATTTTATGTGTGAAGATGTAAATCATACATAACTAGGTGTTTGTTAATCATTGCACTATATGAAAATGAAGTTTGCCATAATTATTGGTTATAT
Unigene0083718	559	T	*	A	CAGTAGTTCGTTCCAAGTGGCTAGTTTTTCCCTAGGCTTGTTCCTTAAACTTCCAAGATTCCTTTCTTCAGAGTCTATCTTTTCCCAATCATTGAATGAGAAATTTCGAACATTTCTGTCTTGCAAAAGATTGAGGAGACCGTCCCTACC(A/T)GGTTTTGGTGCGGCCGTTGATGAAATCAAAACTCCTTTCTCAAGGTCTTCTAAAATGCTCGAAACAGTTTCTTCAGCACAATATAGGTTTGTCGCAACAATCCCAGTTGGCCCTCTCTTCAGCCAACCACATACGTACAAGCCTTCTTCA
Unigene0083760	1928	G	*	A	AAAAAGTTGGATAGCTGATAACTTGAATGACTCTCACTTGGATTACTATTATGGGTTTCTTTTGATCATGTCAAGTGTTAATTTATTGGTGTTTCTTTGGGTTTCAAGTAGGTACATTTATAAGAAGGAGTCGACAAGGGTCAAAGAGGC(A/G)CTTTGCGTTCAAATGGAGGTTAACCCGACTTTGGATGCATCTCTTGGTTTACAAGTATGAAAACTGAGAAATGATCCTATAGCCGCTGCACGGTGCAGTGCAGTGGGAAACGTTCGATCCGATTAGAGAAACAGCGCCCGCGGCCCATAA
Unigene0083765	1086	G	*	A	GAGAAGTTTGGGGTGTAGGCCCAGCCACAGCTCTGAAATTGTATGACAAAGGACACCGTACATTAGACGATCTTAGGAATGATGATTCACTTACAAATGCACAGAAGTTAGGATTGAAATACTTTGATGATATTAGGCAACGGGTTCCAC(A/G)CCATGAGGTTCAAGAGATGGAACAAATTTTGCAGAAAGTTGGGGAGGATGTTTTACCTGGGGTTATCCTTATTTGTGGAGGATCATATCGACGTGGGAAAGCTACTTGTGGGGACATTGATATCATTATAACACATCCTGATGGAACAAG
Unigene0084357	638	G	*	A	AGAACTCAACCTGGGAGAGTAGTTCCAGCCTGTCATTTGCTCAAGCTCATAGCCGTTACATCTCATGTCGCATTCCTCCTGGAACTTCAGGAAGAACATCGATGACCAGTAATCTTTTGCCAAGTTCGTTTTCATCAGCTGCACGATTTC(A/G)TTAAGTGCATTATGAAAGAGATCAGCACGTGCGAGGTTCGAAGTTGACAAAATTTCCTGTTTGCTTCTGTGAGAGATGTTTATCTCCATAGCTGCGCCTGCGACTATGTACTTCTCAATAATATGCCGTGCCATATAGATTCTTCTCACG
Unigene0084467	532	G	*	A	AGGTTGCTTAGATGTTTTTTGGTTATCTCCATTAGAAGAATTCGCAGCCATTGCAAGAACCTCCAAAATTTTCAATTCCTGATCGCGAGATTGAAAAACAAAAAAACGATTAAACCAAAACCCTACCCGCTCTTGTGATTTAATAACACT(A/G)TGATGAGATCAATTTATATATAGAAGACAGAAAGGGAATTAGATCCAATAAGAGAATTTTTATTTCAAAAGTCTTTAAAAACTGATTTAAAAAAAGAATTTAATTTGGAAGGTTTGAAAGTCACGTAAAGTTGAAGGAAGCAATGAAAGC
Unigene0084542	871	G	*	A	CTGAGTGTCAAGTAGATGAAAACCAGTTAACCAATGCAGCTAACATGGCGTCTTGTTCAGAAAGATCCATCAAATGGCATGTTCAAGAAAATGAAGGTCCTAGGAGCCTGCTGGAACATCACAAACTACATCGTCCTCCTTATCATTACC(A/G)TCGTAATCATACTTCGCCTCTCTATAGACCTTCTCCTTCACATTCCCCATCGGTCGCAGCACCACCACCGGTCCCGAGTCTAGACTCTCCTGATCAAAATGCTTCTGATTCTCCAAATCAAAATGCCTTAGATTCTCCGGATCAAAATGC
Unigene0084615	1148	G	*	A	GTTGCTGTTGTTGTAGGTGTTGGGTTTGTAGAGGCGGAGAGAGAGGTTGAACTTTTTATCGAAGACACAGTCTTTGAACGTTACGGTGTTGTCTTGGACGGTGGAAACATGAAATTTGAAGTTGTTTGAACGGTGAACGGAACCGTCGCT(A/G)TAGAGTTTGAGGAAGCCCATGCAGTCTTCAACTACGTGTGGAAGGGAACTCATTATAAATGATAATTGCTTTGTGAGTGTTTGAATTGCAAATGTAAATTCGAAATGATCAATGAGACGCNNNNNNNNNNNNNNNNNNNNNNNNNNNNNN
Unigene0084786	2464	G	*	A	ACCTATCAGCGGCTTAGATAGCTTAAAAGCTAGTGATGAACCTATAGGTTTCCAAGTTGGTTCATATGCGGAACGTTACTTGACAGAAGATATTGGAATATCCAAATCTAGACTTGTTGCTCTTGGATCGCCGGAGGCATATGCTAAGGC(A/G)CTCCAGCTCGGTCCTAGTAAAGGAGGTGTTGCTGCTATTATAGACGAACGACCATACGTCGAAATATTCTTATCGACCCAATGCACGTTCAGGATTGTTGGTCAGGAGTTCACCAGGAGTGGCTGGGGTTTTGCATTCCCTCGGGACTCC
Unigene0084800	1399	G	*	A	TGCGAGAATTCGAAATGAGAAAGCTAAAAGGTATCTTAATAGCATGCGGAAAAAGCATCCTGTTCCACTCTTCCAGAAATTTCCAAATATAGATCCTCTGGCTCTTCGTATACTGGAGCGCTTACTTGCATTTGATCCTAAAAACCGTCC(A/G)TCAGCCGAAGAGGCTTTGTCTGATCCTTATTTCCATGGTTTATCAAACATTGATCGCGAGCCATCCACTCACCCCATTTCAAAACTTGAGTTTGAATTCGAGAGAAGGAAATTGACTAAAGATGATGTCAGAGAATTGATTTATCGAGAG
Unigene0084837	1687	G	*	A	ACAGTGAGGTAGTAGTATTACAGTACTTCCCATGTTTGAAGCCAAATCTCTATAAAACTACAATAAACCTTTATTTTCTACCAACAAGAGGAACCTTGCCTGTTATTCATATTCATTTTTATTATTCAATGCCACTCCCTGTTATGTGTC(A/G)CATCATATTGCAATAGTCTTTGAATAAATATCGAATTTCTCAGAAGATGACAGTTGTGGATCATGAGCGTACTGCTGCCGATTGTCCGTGACATGCTGTTGCTGATTCGGGCCAAACATTCCTTCTCTAGCGCCACGAATCGAAGTACGC
Unigene0084866	174	G	*	A	GTTCCTATATTTTGAAATAATAATAATTATTTTTGAAAAAGAAATCCTATATAATTGAAGCAGAGAGCACAACACACACAAGTGGCACTCTGTCATCCAGAAAATGCTTCACTTCACCCCTCCTATGGAAACAGTTGGTTTGGCCACTCC(A/G)ATGACAATAGCAGCCAGAATGGGATCAGGGTGGTCAACAACCCCTGCGTTTGTAAACCACACTTTTCCGTTGTCTGTGTCTGTAAATAATAAGACAAGAACGAGTTGCAGTTGCAGAAGGAGAGATGACGATCCTCTGTCCACTTTCTCT
Unigene0084868	6004	C	*	A	GATGAAGCTATGAATGAAGAATCTCAAGTTGACATAATATCCAGTTGGAATATTGCTGAATACTTGCCGAAAAAAATCCAAGACCATTATGTTTTCATAGTTTCTCAATTCATGTATATTCCTTGGAACTATGCACGAAAACAATCGGCG(A/C)TCAGGGCTTCCGCGCAGAATGGAGACTCCTGCACCCCATCAATTAATATTGGAGCTGCAGAGGTTTTCGAATCCGAAATAACTGAATATATTAAAGAGCAGATTAGCTCTTATTTCACTGACAAACTCCTTGGAGTTGTTGGTGATATTG
Unigene0085375	432	G	*	A	GAAAGGGCAGAAGATGTTCTTATGCACAAGAGATTACTTCATTTAGCACATGATCCTGCTAATAGGCCTTCGATTGAAGTTCACTTAGTCCAGCTTCATCCCTCATGTGATGGAAACTCAGCTGACTCTTTCCAATCATATGCTCCCGGC(A/G)TAGATTCTGGTCAAAGCTCTCCTAAGTATTCAAACAGGCAGGGTGTACTCCCACCTCCTGCTTTTGGCTCTTCTCCTAATCTTGAAGCACTGGCTCTTGAAGAAAATGACTCTGAAGACTTAGAAGAGGAACGGTTTGTACATGCAAGTG
Unigene0085465	1300	G	*	A	TGGGGTATTTGGTGTTGGCACTTCTTTGGCTCTTGGAAAACAGATTCACTCTTTAATCATAAAAAAGAATTTCAGTCAGAATCCTTTTGTGGGTAATGGACTTGTAAACATGTACTCCAAATGTGGAGATTTGTCTGATTCCCTCCGAGT(A/G)TTTTATCAGATGACTCAAAAGAATTCGATTTCATGGAACTCGGTAATTGCTGCTTTTGCTCGCCATGGAGATGGTCTCAGGGCACTTCAATTTTACGAAGAGATGAGAGTGGAGGGTACAGAACCAACAGATGTTACATTTTTGTCATTG
Unigene0085465	1909	G	*	A	AAACATATATTCTGTTGAAGGGAAATGGAAAGAGAGAGCAAGTTCCATTAAGAGAATGAAAGAGATGGGAGTAGCAAAAGAAGTAGGTATAAGTTGCATTGAGATTGAAAAGAAAGTCAATAGTTTTGTAGTAGGAGATAAATTGCATCC(A/G)CAGAGTGATGTTATATTCTGGGTTTTGTCTGGTTTGCTGAAACACCTTAAAGATGAAGGCTATGTCCCTGATAAAAAGTGTATTCTCTTTTACTTGGAACAAGATAAAGAGAAGTAGTGACTGCATTTATTCTGACTAATCATTTTCAAT
Unigene0085584	581	T	*	A	CTCTTCTACCAGAAAAAATTAGAACTCAATACAGAGAGGCTTTCACTGAATATGCAAAGGAAATAGGTTCATTGGTGAGAAGACTTTTAGGTTTGATATCAATAGGGCTTGGCTTAGAGGAGTATTGTTTGTTGGAGAAGTTAGGTGAGC(A/T)GCCTAGACAAAGAGCACAAGCAAATTTCTATCCACCATGTCCAGATCCAGAGTTAACCATGGGTCTAACTGAGCATACTGATCTCAATGCTCTCACTGTACTTTTGCAATCAGAAGTTTCAGGTCTTCAAGTTAACAAAGATGGGAAATG
Unigene0086302	1128	C	*	A	TTCGTGATCACCTCCAGGAATTATGCCAACACGCTGCCATTTAGATGTACAAACACTGGCATCATAGCCAGAAAGTCTCATCAACTTTGCCAAATAAAATCTGATACAGCTTGCATAACATGGACCAGAATTCACCATTTCTAGGTTGGT(A/C)TCCTTCATTGACCGTATGAGAGAATGAACAACTGGGATCAAGTCGCTCTCATGTTGAGTCACCGATCGCTTACAGATCTGAATCTTTTCAGCAAGGTGAGCAAAATCAGAGAGAGAAGAATCGCTATCACTGCTACACCAAGACTCAGCA
Unigene0086338	773	G	*	A	AATGTTTCTGCAAAAGAACACGCACTAACCTTTCATGATATCAGTAGCCAACCCACAGAAACGGAAAACGTCAACCATGCAGAATGCGGTGAACTGACGTCTACTTGTTTGGAGAATTCTAGTTCTCATGACACTCTTAGCGATGAGGCC(A/G)TTGATAGGAATAATGATAATAACAATAATACTTCTCTGTATGATAAAAGCACTAGTAGTAAGGATGCAGTGATGTCCCGTGTTGTGATGGAAATCCCTAAGCATGTTAGTTCAACCGGTATTAGAAAAATTACTTTTAAGTTCAGTAAAA
Unigene0086908	96	C	*	A	NNNNNNNNNNNNNNNNNNNNNNNNNNNNNNNNNNNNNNNNNNNNNNNNNNNNNNNACTATGGTTCACCTGAAGAGTTCTTCTCTAAGATCAAGCCTTGATTTTTCCACTTTGCAGGTGAATTATTTACTTGGACAGCAAGCATTCTTCGG(A/C)GAAACACAAGCGGAGGGTGGTTTCGATCCAAACACTGTCGCGACAGCAAACATTCTGGAAACTTCAACACCTGTGGTGGATGGGAAAAAGTACTATGTTTTGTCTGTGTTGACAAGAACTGCTGATGGAGATGAAGGCGGTAAGCACCAA
Unigene0087015	100	G	*	A	NNNNNNNNNNNNNNNNNNNNNNNNNNNNNNNNNNNNNNNNNNNNNNNNNNNGAATGGTTAAGATTGTGACAGCGTTTGGATAATAGAAAGAACAAAACAACATTAACAAAACAAGATATGAAACATGGTGGCAATGGCCATGCTTGCAGC(A/G)CAACAGTTCCTGTTCTTCTCATCACAATCAAATTCCAGAATCTCAACGACAACAACAAGACCATGTCTTCCCCTTCCTCAATTCACCTCCATTCTACTACGTTCACGCAACTCTAAGATTCAGTTTCCCCTCATTTCATGTTCTTCTTCA
Unigene0001884	837	T	*	C	CTCCTTCACTTCTTTCCACACCCCCTTCTCCATTATTTGAGCTTCTAAATTTTCCAAGCCTAACCGAAAAAACTCTTTTCCCACTCATTATATGATTTTCCGCATGCCTGTTAACAGAGTTGCCCTCACCAACAACATTGCCAGAAACCA(T/C)ATTCTCTTCACTTAGATTCTCAAACTCATCATAAACCGGATTTTCAAAAGCAAATCCATGTTCATAAAGACTTCCTCTACAAAGAGGACAAGTTGNNNNNNNNNNNNNNNNNNNNNNNNNNNNNNNNNNNNNNNNNNNNNNNNNNNNNNN
Unigene0002027	1345	T	*	C	TAATGACATACCTGAATCTACCGAATTTTTCAGATCAAAGGGAACTTATCAAACAGAGAAAGGGAAATTTTTTCTTACTTGGTATTCCAACAAGTTGCTGACACATGGTGATGATATCTTGGATGAAGCCAACAAAATATTCCTAGGTTG(T/C)AAAGTGAAGTTAGCGGCAAAAATTGCTGGAATCCACTGGTGGTATAAAACTGAGAGCCATGCTACGGAGCTGACTTCAGGATATTACAACTTAAGCGATAGAGATGGATACCGTCCCATAGCACGGATGTTCTCGAGACATAATGCTATT
Unigene0002515	2282	G	*	C	GTACTATAGTACTGAGTTGACGATGAGGAATCATCATTGAGAATCAAATTCTGAGATTTAACAAACTTGAACTTTTTGTTACTTGAAACAATTTCAATCCCAGTAATGTTTTGGTTTGGTAAGATAGTGTTAGTTGGATTTGAAAAGCTA(C/G)TCCAATTTCCAAAAACAAGGTTTCCATTATCATGAAGAACAAGTTGTGTGGAATTTGAATTATCAACAAAGGAAAGATTGTTGAGCAAGAGTTCACCTTTTGAGGTTATGATGAGAGAGGAAGATGAGTTGAGTTTTGTTGAGATGCTCC
Unigene0002614	1078	T	*	C	TTGTCAACCTGATGTATGGACCATGAATTCAACGCTCAGGGCCTTTGGCAACCTAGGGCAAATAGAAACAATGGAGAGGTGTTATGAGAAGTTTCAGGCATCTGGAATCCAACCAAATGTTGCAACCTTCAACATTCTCTTGGATTCCTA(T/C)GGCAAAGCCCATGATTACACAAAAATGAGTGCTGTAATGGAATACATGCAGAAATATCATTATTCTTGGACAATTGTGACCTACAATATTGTGATTGATGCTTTTGGGAAGGCTGGGGATCTCAAACAGATGGAATATTTGTTTAGATTA
Unigene0002617	528	G	*	C	GCCATCTAAGGGAACCAAATCACCAGTTATGAGCTTTAGGAATGTGCTCTTTCCAGCTCCATTGGGTCCAACCAAAGCAATTCTGGAGTCTAGGTCGACCCCAAAGTCAATGTTCTTGTAGATGAGATTATCAGGAGTGTAACCAAATGT(C/G)ACCTCCACAAACTGGAGAACAGGTGGGGGAAGTTTACCCACATCAACGAAACGGAAAACTAAAATTTTGTCTCTTACCACCTTCTCTGTAAGTCCACCACGCTCCATTTTTGCAAGAGTCTTCTCTTTACTCTGAGCTTGGCGAGCTAGT
Unigene0002676	257	G	*	C	GAACAACTCCATCCTTCACCACACTTGCAGAAAACTTCACTGCCACTGTCACTACTAATCTCAATTTTAGGTGACGCAGCTCCACCATCAAGTGTACAGGTGCAATTTTCACCGCATTTAACGAAAACTTTGCCAGCATCAGACCCATCA(C/G)TCCTAGTTATAACACATGTCCAACCTTTTCCTGTCTTGCACAACACATTGCCCAAGCCTTCTGTGGCTTTCTCTTGGTCTTGCGTGAAGCTTGAGGACTCCATTTTCTCAGAATGTTATGATATGATTTTCGTTTCGTGTTATTTTTGNN
Unigene0002683	104	T	*	C	NNNNNNNNNNNNNNNNNNNNNNNNNNNNNNNNNNNNNNNNNNNNNNNTGAAAAGTGGGTATTAGGCTGAATGTTGATCTGTTATTTACAAACTTAACTTTTATATTTAAACAGTTTAAAAATGAGCCTCAGAATGTTAAGGAGCCATAAT(T/C)TAATGAACAAATTTCACTTATAAGCACCGTAAGCAAAATTTGAGCTATGAAAGAATTGAATTCCTACGAAAATTTTGACACGAATATGAGCAAACTAGTTATTATTGTTCTGCTTGTGGAGCTGTCCAGTATTGCTTGACTGCTACAAGT
Unigene0002693	358	T	*	C	CATTAACAAATCCAATCTTCAAACTTGTTCTTGTTCATGCAAAACCTTCTGTTAGTGCTAGTGTTGGATTCGTTGGACCTGGAGCTGCTGAGGTGCTGCCTATTGTGGATGCCGACTTGAAAAGAACTGCTGTGTTGGTTATTGAACGAG(T/C)GAGAGAAATCTGCACCAAAAGATCGGTAAAAGACATATTTGTGGAAACCGTGGAAGGTGATCCTAGAAATGTTCTTTGTGATGCTGTGGAGAAGCACCATGCTTCAATATTGGTTGTTGGTAGTCATGGTTATGGAACTTTAAAAAGGGC
Unigene0002747	1687	T	*	C	CCCCTCCCCTGTAAGTTTAGGGATAGTTTCGTTTTAGCCGCAGGGTTTTCCTCATTGTAAATCATTCCTGTATCCAACGATACTTCGCTAAATTGATTTTATCCCAATCCCTACCCTTTAGTTAGTCGCCTTGTTCGAAATTGCCTGCAA(T/C)ACACAATTTAAGTACATGCAAAAAAATGTATTTTGTCCACAATTTCCAGCCGAGAGAGCAAAGAAAGAAAAAAAGGAGAATGCAAAAGATGGTCATTGCCTTAGTACCTGTTGTTCTATTGGGACTTAAAACGCTAAGGATTAAAATGAA
Unigene0002767	129	T	*	C	NNNNNNNNNNNNNNNNNNNNNNGCTCAACCAACTAAAAACTGAATGACTACTTGAAAAGAAGCACCTTCGTCACAATCCTTAACCAGAAATCGACCATACGAGGTTGTGGTCGCAACCCTGCTCGCAGCACCCCCAGATTCGACTACCCA(T/C)AGCTCAAACATTCAAAAAACCCATCTTTTTCACTATCCCTAAATTTAATCATCTCCCTCAATATTCTTCACCGTGTAACACCAGTTAGGGTTTTCTCCCTCACTGAAATTCCGTCACAAAAACCAACCAATTAACCAGCAATGTCAAAGA
Unigene0002895	60	T	*	C	NNNNNNNNNNNNNNNNNNNNNNNNNNNNNNNNNNNNNNNNNNNNNNNNNNNNNNNNNNNNNNNNNNNNNNNNNNNNNNNNNNNNNNNNNNNGTTTGCAATAGCACCAACACTAACTTTTGTGTTCCTCTTCTAAAACACAACAAAAATCA(T/C)TAGAGACATAGCATATATACATGGCATCAATGGAAGACATGAACATGAGTAATGAAGAAATTACACTTCCTGGATTCCGATTTCACCCTACAGAAGAAGAACTCCTTGATTTCTACCTTAAAAACATGGTCGTCGGCAAGAAACTTCGCT
Unigene0002895	245	T	*	C	AGACATGAACATGAGTAATGAAGAAATTACACTTCCTGGATTCCGATTTCACCCTACAGAAGAAGAACTCCTTGATTTCTACCTTAAAAACATGGTCGTCGGCAAGAAACTTCGCTACGATGTCATTGGTTTTCTCAACATCTATCACCA(T/C)GATCCCTGGGACTTGCCAGGTTTGTCAAAGGTTGGGGAAAGAGAATGGTATTTCTTTGTGCCAAGGGACAAAAAACATGGTAGTGGAGGAAGGCCTAACCGCACAACTGAAAAAGGGTTCTGGAAAGCAACCGGTTCGGACCGGAAAATC
Unigene0002895	326	T	*	C	CCTTAAAAACATGGTCGTCGGCAAGAAACTTCGCTACGATGTCATTGGTTTTCTCAACATCTATCACCATGATCCCTGGGACTTGCCAGGTTTGTCAAAGGTTGGGGAAAGAGAATGGTATTTCTTTGTGCCAAGGGACAAAAAACATGG(T/C)AGTGGAGGAAGGCCTAACCGCACAACTGAAAAAGGGTTCTGGAAAGCAACCGGTTCGGACCGGAAAATCGTGACGTTATCGGATCCAAAGCGGATCATCGGGTTGAGGAAGACGTTGGTTTTCTATAAAGGAAGAGCTCCACGAGGAAGC
Unigene0002895	700	T	*	C	AGATATATAGAAAGGCAACTTCGTTGAAAGTGCTTGAACAAAGAGCAGCTGAAGAAGAAGAGATGAAACAAATGGTGGTGGGTTCTCCTACATCCCCACCTTCCTCTACGGACACAATCTCCTTTAACTACACACAACAAGACCAACACG(T/C)GTCATTGCCGATATTGTTCCAACAAGTTATTCCTAAGGAAGAATCCCAACATGAAACAGAGACAAAAACTCATGATATGGTTTCTCAGGTGGCCATGACTGAGAAACCATGTCATAATAACAAAAAAGCTTGTGGAACATCGTTGCAATT
Unigene0003022	391	G	*	C	CGGCAAGCACTCAGTTGCAGCTGTCCAGTGCAATGCATCAAGATGACAGTAAATTGCTAGAGCATTTTTAAAGTTTAGGATAGAAAATCCTCGTTCTGTTCCAAGAAAATCCACCAAGAGTAGGTTGCATAAACAATTTCGAAATGAGTT(C/G)AACCAAAGCATCGATTTTTGTTTACACACTGCACCAGAGAAAAATGCAGAAGGAAATGCGGGCGAGCAGATAAACGTCTGTTCTACATAAGCCCCTTGCAGATGCTGGAAGTTGAATTTATCTTCATTGAGCATTCAGGCATATAGGCAA
Unigene0003099	1180	T	*	C	TGTGAGGCAAGGATTTTTTGATAGAGTTTGAAGGACAATTATCGGGGGCAAAATATCATCTCTCTCAATGTAATTCAAAACTTCTTTTACTTCTTTCGAGCAATCTTCTCCAAGCTCACCAAAATATTTGAGTACATCTTCCCAAAGAGA(T/C)GGATCCCCTCCTACTGAATCACCCAGTCTTTTGCAGCACGCAATTAATCCCTCGTGATCATGCGCTTGCATATAGCAAGTGATTACTTCCTTATAGAGTTTCATCTTTTCATACAAATACAAAAGCCCGTCTCTGAATGCGTTCATTTCA
Unigene0003151	196	T	*	C	GCAACTGCATAAGACTTGGTAATTACAATTAGTAATAATTTCACAAATGCAAGGGCTTTGCTGGAAAAGCCAACTGTACAAACCGATGACCAGCATACATCTACGTATACATACAAATGTGAGATACTATTACTTTCACATCCTTTAACA(T/C)GGCCGTATAATCGTTTAACAATAAGAACATAAGAAGCTAAAGAAGAATTGAAAGAGAAGCTGATTTTAGAATTTAAGGGAAAAAACACCAATGGAGAATATACAAGCCGCCTATACAAGTTCACTCAAGGTGTGGTGGACAAAAGGACTT
Unigene0003263	473	T	*	C	TGCCGATATGGAAGATGGAGATCTACATGTAGATGAAGGAGCTCCTGAGCATGAGGTTCAAGAAAAGGATAAAAAATCTTCTAAGAAAGTTATAACCACTGCTATGGTCGATTTGTGGTGCAAATCAATTAAAGAAAATGGGAGCTTAAA(T/C)GCAGTTCGTTCCTTGATGAAGGCATTTAGGACAGCATGCCACTATGGTGATGATGAGGAGAATGAGTCAATGGCAAAGCTTAGTGTAATGTCTAGCGCAGTGTTCAACAAAATAATGTTGACTGTACTTAATGAAATGGATGGAATACTA
Unigene0003263	1955	T	*	C	TAGTGCACTATCAAAGTATGTTATAACACTCCGCCAGAGAGCAGAACAAAAAAACAACTCATTAATGGAATCCAGTGTTATTGTTGGAAAAGAGTCCTCTGTTTTTGGTGATGAAGCATCAGAAAGTGATGAAGAGGATATTAAAGAAGA(T/C)GAGGATGGAACTGCCGCCTTTAGCTCATCCTGGTTACCCGGAAATGACAAGATAAAACAAGAACCTACAGAAACAAAAAGAAAGAGGAAAAAGCATCAGAAAGAGAGAACAGCCGTTGACGATGATATTGTGGAAGACTTGGTACTTAGT
Unigene0003460	345	A	*	C	GAATAGAATAGCACCTTGGAGGAAACAGATAACAGTTCGAGGATTAATAGCTAGTTTTGTAATTGGAGTCATTTATAGTGTGATTGTCATGAAACTCAATCTCACTACTGGATTAGTCCCTAATCTTAATGTCTCTGCGGCTTTACTTGG(A/C)TTTGTGTTTATTCGAATTTGGACTAAGATTCTTGCAAAGGCTAAGATTGTTTCGATTCCGTTTACTAGACAGGAGAATACCATCATTCAAACTTGTGCTGTTGCTTGCTATAGCATCGCCGTAGGAGGTGGTTTTGGGTCTTACCTATTG
Unigene0003505	506	G	*	C	CCATATTATCAAGCTCTGGATATTAAAATCAAGGACTATGCCCTTAAGGCAGGGATTGAGGTTTTCTCTCCTGTAAGCCACACACTTTTTGATCCATCAGATATTATACAGAAGAATGGAGGGAAGCCGCCGCTTAGTTATCAATCATTT(C/G)TCAAGCTTGCGGGGGAGCCGCCATCTCCACTCTCGACCAAGTATTCTTCACTTCCTCCGGTTGGCCATCTTGGAAGTTGCGAGATTTCTGAAGTTCCATCTGTCAAAGATCTTGGATACGAAGATGCTAAACTGGGGGAGTTCTCTCCTT
Unigene0003679	2397	T	*	C	TACAACAAAACAACCCACTAATATCCAATGGAATCAACAAAAAGCTGACCCTTTTACCCTTTTCCCTAAAATGCAACTAATTGCTAACTCCACAACCAGGAACACAACAAAGTTTAAGGATTCAAGCCACACAGTATAAATGCCTCGTCG(T/C)AGTTGCAGAACCCCAAACGCCACAAAAGAAGAACCTTACAGGTTAAATCATCCACATCAGCAAAACCTTAGGGTAGGAAAGTAGTGTTTTTTGTGAAGATTGAGAAAGTAGAAGTTGGGATCAAAGAAGAGAGAAGAACAAGACAGGTTT
Unigene0003721	2308	T	*	C	TACCATTATTAGAGACAGGTATGATCAAATAACCTTCACTAATAGGATTTTTCATGACCCCATATCGCAGAATCATAAGCATAAAAAGTGTAAACGATGAGGCAATCAGAACTCCTCCATACAATTTCTTCATCTTGATGCTCCTATGAA(T/C)GAAGCAATATCCCTACGACTTTATGGTACTTGATCATGAGAATGTCAAACTACAACCAAATTGATCATTGTCTTTCAGACAACTTCTTATAATAATTGTGGAGAGAGAAATGGTAGAATAGAAACAGATAAGGAACACAAATATTGTAAA
Unigene0003740	362	T	*	C	CATCCAACACATCCATAACCGCTTCGCTTCTCGCTACCGCTGGTTCGTTTTCCGTCCCGGTAACACCAGTCACAGGAATCAAAGGTATTCTAGAGCATATATAGACTTCAATTCTCCAGATGATGTTTTCGACTTTGCTGAGTTCTTCAA(T/C)GGACATGTTTTTGTTAACGAGAAAGGTGTCCAACATAAAGCAGTAGTTGAGTATGCACCATCTCTGCGTGTTCCAAAGCTGAGTACCAAAAAGGATGGCCGTGACGGGACTATATATAAAGATCCAGACTATCTTGAGTTCCTCAAACTC
Unigene0003743	3069	T	*	C	TACCGATGGTGCCAAACACCTTAGGTTCATTGCTAAGGAATCAAGGATGGTTTTGAATGAAGGTTGATTTGGAGTGTAGACTGTTGTGTGAAATGGATATGTTCTGTCTGAATTCATGTTGAGACATTGGACAAAACTTTCTTGAAGTAA(T/C)AAAGATGAAACTTGTAAGGAAAGTGTTGATAAGAGAAGGATACAAATTGGCAAGGGTGAAATTTGTGACACCATGTTCACAACTCTTGTGTTTGNNNNNNNNNNNNNNNNNNNNNNNNNNNNNNNNNNNNNNNNNNNNNNNNNNNNNNNN
Unigene0003760	77	T	*	C	NNNNNNNNNNNNNNNNNNNNNNNNNNNNNNNNNNNNNNNNNNNNNNNNNNNNNNNNNNNNNNNNNNNNNNNNNNAAGCATGTTCATTTTTTTACATAAAGAACAAAGCTTTACTTATCCATTATAGCATATTCAGTTCTATAACATTTCA(T/C)TCATCCGTTTACATTATTCATCTATATTGTTGAAAAATAAAACATAAAAGAAAAACAAATTGCAAGAACAAAATGGAGCCACATATGATCAAGAATGTAGAAGCTCAAAATTCAGCTTCTAAAAGGTTAATAGGTAAGGTGGCAGTTATC
Unigene0003760	81	T	*	C	NNNNNNNNNNNNNNNNNNNNNNNNNNNNNNNNNNNNNNNNNNNNNNNNNNNNNNNNNNNNNNNNNNNNNNAAGCATGTTCATTTTTTTACATAAAGAACAAAGCTTTACTTATCCATTATAGCATATTCAGTTCTATAACATTTCATTCA(T/C)CCGTTTACATTATTCATCTATATTGTTGAAAAATAAAACATAAAAGAAAAACAAATTGCAAGAACAAAATGGAGCCACATATGATCAAGAATGTAGAAGCTCAAAATTCAGCTTCTAAAAGGTTAATAGGTAAGGTGGCAGTTATCACAG
Unigene0003760	95	T	*	C	NNNNNNNNNNNNNNNNNNNNNNNNNNNNNNNNNNNNNNNNNNNNNNNNNNNNNNNNAAGCATGTTCATTTTTTTACATAAAGAACAAAGCTTTACTTATCCATTATAGCATATTCAGTTCTATAACATTTCATTCATCCGTTTACATTAT(T/C)CATCTATATTGTTGAAAAATAAAACATAAAAGAAAAACAAATTGCAAGAACAAAATGGAGCCACATATGATCAAGAATGTAGAAGCTCAAAATTCAGCTTCTAAAAGGTTAATAGGTAAGGTGGCAGTTATCACAGGTGGTGCAAGAGGA
Unigene0003785	345	T	*	C	TCTTCCTTGTTTCGCAACTTTACCATCTCTTTCTCTCAATAGATTCGTCTTTTCCACTCAAAAATCTCGAACAACTACTACTACTACCACCACCCGTGCTTCTTTTCATGAAAATCCAGTTCTATGGGTTGGTAGAATCTGCGTCTTCTA(T/C)GCTCTTCTCAAGACTGGATTAGTCGGATCTCCATCAAATCCGTTCCTCTCAGATTTGGAAATTGGTAGTAATGGTGATAGTAATGATTCTGGTGACTTAGGGTTCTCTAAATGGACACAGTCCATACTTGGAAAACCAGCCAAGGAAGAA
Unigene0003790	473	G	*	C	CTAATTGTGAGCTGAGGTGTGGAAAAATGGCCATGCAGGTACTCATTGAAAAAGTTAAACTGCCTTTGGCTTTGACTTAATTCGCTTCACCCTTGAGTAGAGGAAAACGCCAGCAAGACCAACGGCGGTACCTAAAGCATTCACAGGAGA(C/G)ACGGGTGTTTTGAAGATGATCACAGAGCTCACAATAACCACGACACGCTTCACACAATTGCCGACGGAATGAGTAACAGGTGATACCCTCTGCAATATCATGTAAGAAACTTGTTGATATGCATGGAAACAGAGTGCAGCAAGAAGAGAT
Unigene0003807	70	A	*	C	NNNNNNNNNNNNNNNNNNNNNNNNNNNNNNNNNNNNNNNNNNNNNNNNNNNNNNNNNNNNNNNNNNNNNNNNNNNNNNNNNATGTAATACACTAATACTCACCACAAGGCAATAATCATAAATATTTTTACAGGTAGTTTAGGATTTCAC(A/C)AAATCTCCTGGATGCAATACAGAACAGAACAATGGCAAACAGGCCATTAATGTATAGTTACAAAATAAGTAGAGCTGCAAAAGCCAAGAATAAACTGTCAACGAGCAACATTTCTTCTTTTACAAACAAAGGCCAACGTGATATACATTT
Unigene0003807	1062	T	*	C	TACATCCTGCCTCATCAACATGAGGTGATACTGTAGGAACCAAATCTTGTACTTCAGCAAGTACAGGTGGAGGAGAAGGCTGTCTGATAACTTTTATAGGATCCAAGTCTTCTGTTTCTTCAAAAGAGATAAGTGAAGGAGTTTCATCAG(T/C)ATGTTGGACCTGGCAGTCCTCACTCTGGGCAAGAGTAGATTCTAAATCTGATATATTCTGTTCTGAAATGCTATTATCTTTTTTATTCAGAGATCCATCTTCCAAGGATTGGTGAAGGCTTGGAATTTCAACTGGAGACAGATCTATGAT
Unigene0003807	1318	T	*	C	GGATTGGTGAAGGCTTGGAATTTCAACTGGAGACAGATCTATGATAGTGGGATACCTCACCCCTTTATCACTTGTAGGTGGTTGCCACTGCCCTTTAAGCCCATTTGGACCTAGAATAGAATGTCTGGAGAGAGTTTCTTCTTTTGGACG(T/C)GGGAGAGTTAGAGATAATCTTTTCATATTATCTTCAACAGGCCTTACATAAGAAAACTGCTGGCCCCTTGATCCTCGGGAGACAAGCTCTCCTGCAGTTTGTCTGACTGCCTTTATTTGATCATAACTAGCCGTCGTTTGCTTTTTCACT
Unigene0003814	1815	T	*	C	GAACAAAAACAACTGTTGTTGCTGTTGCTGCTGCTGTTGTTGAAATTGTTGTTGTTGTTGAAATTGTTGTTGTTGCTGCTGCGGTTGCTGGAACAAATTGCTTTGCTGTTGAAAAGGAGATTGTTGCTGCTGTGGTTGAAAAAGAGACTG(T/C)GGTTGCGGTTGCTGAGGCGTGGAGAACAACGAAAGTGACATTGTGAAAAAGCGATATCAGAGAGTGAAGAAAACCTCAAAACCCCCTTGTTAAACCCTAGGAACAGAATGGGGAAATTGAGAAGGTTTAAGCGTTACTGAAAAATCTTCG
Unigene0003950	2423	G	*	C	CGTCAAACTGATCAAGCAACCAATGTAGGAATCGGCCGCGGAACTCGAACGAGAAGCGGTATCGGAAGCCATGACCTAGGAAGAATTGAAACCATACACTGTGTGTATCAGCTTTCAAAAACGAATACACACCTTAGGGTTCAAGCGGTT(C/G)TTTGCGTGATGGGAGAGAGAAAGAGGGGAGATGAAAGAGAGAGAAAGAGATAGACTCGAAAGTAGTGAAAGAAAGAGTGTATGAGTGAAGAATCTACGCTGANNNNNNNNNNNNNNNNNNNNNNNNNNNNNNNNNNNNNNNNNNNNNNNN
Unigene0003992	1631	T	*	C	CTACCTAAGACAGAAATTAGCCAAGACAGAAGCTGAGTTATTGGCCGAGAAAAAATGTGTGGCTCACCTAACAGGCGAGGGAATTGCTGTTTGTGATCTTCCTGGTGATACCATGCTCCCAGGAGAAATGTAACAAGATAATATTCTGAA(T/C)ATCAAAGGAGATTTGGAAGTAAGATCATACGAAATTATGTAGAATAACGAGGAGTGCTAGTAATACTCTTTTTTCAACCCTTATTCTAATGTTCACCATCTTCTCGGGTATAACTCAGCCGAGTCTCGCCACTTTATGAGAATCTCCTAT
Unigene0003992	1782	G	*	C	ATCAAAGGAGATTTGGAAGTAAGATCATACGAAATTATGTAGAATAACGAGGAGTGCTAGTAATACTCTTTTTTCAACCCTTATTCTAATGTTCACCATCTTCTCGGGTATAACTCAGCCGAGTCTCGCCACTTTATGAGAATCTCCTAT(C/G)TAACTGATATCCATGTTGATTTTACTCGAAGAAAGACTCGTGTTAGAGTGAGAGTTGGAAAGAGAGGATTCCTTGCAGTTCAAGATAAATAATATAAATTTCAAAACATTAATTTGACTTGAAAACCTTAAAGCTCATCAACAATGTAAT
Unigene0003993	1086	T	*	C	TATACCTTATGTTGGTTTTAGAGCAATGCGTGCTGGCCTAGTTGCTGACACATACTTAGAGGCCATGTCTGTTTCTCATTTTAAGAAAAAATATGAAGAATATGAACTTAGAGGAGATGAGGAAGAGCAGATCAAACGTTTAGCAGAAGA(T/C)GGTGATATCTATGATAAGCTGGCAAGGTCACTAGCTCCTGAAATTTTTGGACATGAAGATATTAAGAAAGCACTGCTGCTGCTTCTTGTTGGTGCACCCCACCGGCAATTGAAAGATGGAATGAAGATTAGAGGAGATCTACATATATGT
Unigene0003994	457	T	*	C	TTCTCGAGAAGCGCAGAAACAAAGACGCAATTCGAAACCTCTATGATGGTTACAAGCGAATTAAACGATGTCTCCTCCAGAAACAAGGTCCCTCCACACCTGAACTTGATCACAACTTTCTTGCTCTCATCGCTTCTTCCAGAGGTTGTA(T/C)GAGTGTACAAAGAGTTGTGGCCGATTTAATTCCTCGATATGCTTGTCACTGTCCAACAGCTTTGGAAGCCGCGGCCAAAGTGCTTATCAATATGCATAACTGGAGTTTAGCATTGATCAGTAAGGAAGAGGATTCCAATGGCATTGCATT
Unigene0004022	1677	T	*	C	TACCAACCTTCCAGGAGTCGCGACAAGAATGTCCACCCCTCTCTCAAGCTCTCGTAGCTGCTGGTTTATTGGAGCTCCACCATAAGCAACAACCACCCTAACCCCTGTCTGGTACGAAAATTTCCTAGCCTCCTCGTGTATCTGCATCGA(T/C)AGCTCTCTAGTTGGAGAGAGAACAAGGGCAAGTGGACACACAGTACGCACCCCGCGAGGCGGCCTCTGAGCAGGTTGTCCGGTCATAATTCCACTGATAATTGGAAAACAAAAAGCAGCCGTCTTTCCCGAACCAGTCTGCGCACAAGCC
Unigene0004074	2237	T	*	C	GTTGGGACCAGAACCAATTCCAATATATGAGCTCAATGTTGAGAATTTATCAAACGCTATAAAATTCATGCTCCAGCCAGAGGTGAAGTCTCGGGCGATGGAAGTTGCTAAGTTGATAGAGAATGAAGACGGCGTTGCTGCTGCAGTTGA(T/C)GCGTTTCATCGCCAGCTGCCCGACGAGCTACCACTGCCAGCTCCATCTCCTGTTGAGGAGGACCACTTAAGTCATATTGAGTGGTTTTTTGACCAACTTGCAAAGTGGTGTTGTGTACCTTGTGGTGGTGTCTAGNNNNNNNNNNNNNNN
Unigene0004109	582	T	*	C	ACTGTGTCCTGCTAAATCAAACCAACCAGGCTTCCATCGTTCCGGTATCCTCGTCACGTAGAACAGTGTTCCAATCAAGTAAGAAAATGCCATGGCACATTCATATGCTAGTGTAATATTGCGCCGAGGATTTCCCCAATTCACAATACA(T/C)GCATGAACTGCAGGCACAATACCGAAAAGTCCCATCGAGCAGAACAACATAGCACGAAACGCGCGATGTTTTCCAGTAGAAAGCGTTGGAGAAAGCAATGTTACTATAGTGAATAGTCCCATGGCTGTAATACCAGCCAGGTAGAGGAGT
Unigene0004118	2142	T	*	C	TAGATACAGATGCAATATACCATACAGAAAATGCCTTTTTTTCTCCTATTTGTCTTAAAAAGGTTCATAAAGTTGAGTGAAACAGTAGTGTGTAATTAAGAGATGTGGTTACCATGACTTGGTGAGGTGAGGAGAGGAGAGAATGCTATA(T/C)GGTGGTTCAGTTTGTCATTGTAAATCATACCTTCCATTGTCTCTACATTTTCTTTCTAGCCTCAAAGGGTGATTGGTGTTGTAAATCTCTGATCAACTGGATTTTTGTTTAATGTAATCAAAGTTCTGATAAAAAAANNNNNNNNNNNNN
Unigene0004142	177	T	*	C	TTTATTTGGTCACCATGAGAACGGTTGTGTCTCAAGAATCAACACTGACGCACAAGGATTTAACAAGAAAATTAACTCAGCTGCATCAAATCTTCAAAAGCAACTTCCTGGTCTTAAGGTTGTGATTTTTGATATTTACAAGCCTCTCTA(T/C)GACCTTGTTCAGAGCCCTTCAAATTTCGGTTTCGCTGAGGCGGGGAGAGGATGCTGTGGTACAGGAACGATCGAATTAACATCACTATTGTGCAATACAAAATCACCAGGAACTTGTTCTAATGCAACTCAGTATGTGTTCTGGGACAGT
Unigene0004173	282	T	*	C	CGAGAGGCGACAAATAAAGAGGAAGAAGTTGTGATTTGATTCGAGAGTTTGTCAGAAAAGTCGAATAAAATCACGATAAAACAAATTGAACTTCAATGCAGAGTTTTGTAATGCAATTTATTTGAAATATAAATCCGGTTCGATATTGTA(T/C)AAGATCTTATATGAATACATCAACCTAGTAGAAATTTATTGTCCCTCTAAAATGTTAGTATCTTTTATCATTTTGAAATCTTTGCCGCAAGTTCTCTGACCAACTTAGCAGCTACCATAGCAGTCATTCCGTCAACAGTATCACGTTGTG
Unigene0004173	340	G	*	C	AGTCGAATAAAATCACGATAAAACAAATTGAACTTCAATGCAGAGTTTTGTAATGCAATTTATTTGAAATATAAATCCGGTTCGATATTGTATAAGATCTTATATGAATACATCAACCTAGTAGAAATTTATTGTCCCTCTAAAATGTTA(C/G)TATCTTTTATCATTTTGAAATCTTTGCCGCAAGTTCTCTGACCAACTTAGCAGCTACCATAGCAGTCATTCCGTCAACAGTATCACGTTGTGGGTTGAATTCAACGACATCTCCAGCAACAACATCACCTTGAAGATTGTGTAGGATGTT
Unigene0004244	1574	T	*	C	CCTCGGAAGTAGTATTTATTGGAGGGAGCACAATAAAATCTGGGATATTGTAACCATATATGCAAATTCATTTCATTTCATTTGCTATTCAAAAGATTGAATAGTTTGAGAAGTGGATTGAATAAGAGGTTTCATTATTGATTATTCTTA(T/C)ACAGTTTTACTGTGTGTGGAAAGAACTATTATTGGATGTGAATCTTTATGATTTTGTTGATGCTAGAAGCCTAAAAGCTCAGGTTATTTTATAATCCTTATAAGTTCGATTGAGACTGGTGTGCGGATAATTTGATGCCGTGCTAATGTT
Unigene0004345	270	G	*	C	CTTGGAAGATAAAAAACAAGTAGCAAGCTTATTCTATATGCTTAGTAAAAACTAAAATAAACCTAAAACAAATAGTTTTCATCACCTAACATTGCTCTCAAAACAGTTTCTTTCTGTAAACCAATTCTCCTTAGAAAGAACCGTGCATCT(C/G)TTCTTAATTGTTGCGAGGAGTCGAGGCTTCGGATGGACTATTTGATGAGTCACTGGTGAGGGAACCGTTGCCACCATCGTTCTCAGAGACCACTGGTATCTTCACAGCGGCTGCTCTTTCCATCTCTTTCTCGAGTTCTTCCTCTTTACG
Unigene0004345	316	T	*	C	AAAAACTAAAATAAACCTAAAACAAATAGTTTTCATCACCTAACATTGCTCTCAAAACAGTTTCTTTCTGTAAACCAATTCTCCTTAGAAAGAACCGTGCATCTGTTCTTAATTGTTGCGAGGAGTCGAGGCTTCGGATGGACTATTTGA(T/C)GAGTCACTGGTGAGGGAACCGTTGCCACCATCGTTCTCAGAGACCACTGGTATCTTCACAGCGGCTGCTCTTTCCATCTCTTTCTCGAGTTCTTCCTCTTTACGCAATGCGGTAAACTGTGTATCCAATGACTTGGCTGCTCCTAACCAG
Unigene0004345	424	T	*	C	TTAATTGTTGCGAGGAGTCGAGGCTTCGGATGGACTATTTGATGAGTCACTGGTGAGGGAACCGTTGCCACCATCGTTCTCAGAGACCACTGGTATCTTCACAGCGGCTGCTCTTTCCATCTCTTTCTCGAGTTCTTCCTCTTTACGCAA(T/C)GCGGTAAACTGTGTATCCAATGACTTGGCTGCTCCTAACCAGGCAAGAACAATCACTAGAAGCACACCTCCCAGGTATGGAGTTGAATTGGCGAGTGATCCGAAAGTTAGGATCATGAATTGTTGAATAAGAGCGCCTCCGGATTTTCCC
Unigene0004357	1464	T	*	C	TCTTTGTTCGGGAACTCTCCTCCTTCTCCGTCGACTTCGCCTCCGTCTCTCCTGTCGGTGGCATCTCCGCTTGAGAGGCCATCATCCTCTTCCAATAAAAGAAACCTCCGTTGTGCATCTGTCTCGTTTCTGCTGCCACGGATGGTCTCG(T/C)AACTGCCGCACCGTGACGGTTACAGTTCCGGCCATTGATGATAGCTCGTCGAACCAAATAGCATAATGCTGAATGCTTCATCTTAATGGATCACGTTTTGCAAAAGTTCCCAACTAATCTGGAATTACGGTTACTGAAGAAGCGTGGCGG
Unigene0004400	768	T	*	C	TCCTGTTGGTACATCGCTTAATGTTCGTCACTTTGTTCCTGGACAGTATGTTGATATTGCAGGAATCACTAAAGGAAAAGGTTTTCAGGGTGTAATGAAGCGGTATGGATTTAAGGGAGGTTCAGCATCCCATGGGAATTCTAAAGCACA(T/C)AGAACCATGGGTTCTACAGGACAACATGATTCTCCTGGAAGGGTTATTAAAGGTAAAAAGATGCCTGGGAGAATGGGTNNNNNNNNNNNNNNNNNNNNNNNNNNNNNNNNNNNNNNNNNNNNNNNNNNNNNNNNNNNNNNNNNNNNNNNN
Unigene0004476	771	T	*	C	GAGATCTTTTGAAACTGCGTACAATTGTCCTGTGGCATGACGAAAGTACTTGTTTCCTGTCTCGCCGAATTTCCAATATTCTGGTTCATGGTACCTTACTCCTTTTTGAGAAAGAACAGGTCCAGATTTCATGCATCCGATGTATACTCG(T/C)GGTTTTGCTCGATGTCTAACTAGAGTTTCGCCGAGTGTTGCTATATTTACATGAACATCATCATCAACTTTGATATAAAAATCAGCATCCCACAAATTAACCGCCGTCGCAAAGTAGGTCTTTGTCTTTGCTGATAATTCAAGGTATCCT
Unigene0004517	903	T	*	C	CGACCTTTTCGGCGGCAGCGGCCGCGGCGATCAACTCGACCTTCAACAAACCATGGAAAAACAAACCCTAGATCATCATGGATTCATCCAAATCAATGATAACTTATGTCTTGGCAAGAAGAGGCCAAACCCTAACGCTAACCCTTATAA(T/C)GGAAACGGAAAGAGTCCTTTAATGTGGAGTGATGATTTAAGGCTTCAAGATTTAGGACCAGCTTCATCATGTTTAGATGATCCTTTCAAAGGTGACCAAATTCAAATTCAAATTGCACCACCATCATTGGATAGAGGAAATGATATTGAA
Unigene0004541	168	A	*	C	TACATGGAGGTACAAAGTGCAAGTGCAAGTGCATATTGGAGAACAAGCAAAATCACATAAATGAAAATCCAACACACTAGCTCACTGAGTACAACTCAACGAAAGAATGATAAGCTGAAAAATAACATGTTACCCATTTATGAGAAAGAT(A/C)CATACACATATATACACACACGGGTTCGGATGCACAATATTACATATAAAAATACACTTAGTTTTTACTTACTTCATCAAAGCTAAATCTATGACAGTGAGAAAACTGTCCCTAGCATATTCTAGTTCTAGTACCCTATTACCATTTAAC
Unigene0004548	2025	T	*	C	GTGCCTTTAGGACCTAGATTGGATTTGAGAACATCTTGCAAACCCTTAGCGGCATTGATGTTCATGTGAAGTGCCGCCGATTTGTTCAGAACTTCGGCGTTAGGGTTCAACACTCGTATAGACATTTTCGCTTTTTTTTCTCAGCAACGA(T/C)AACTGAAGCTACGATATGGAATCGATCAGAGTGTGCGTGAAGTGAAATGGGAGTGAATGAACGAAGAAGGGAAGAAAATAAGCGGTTTTAGGGGTTTGGAGTTGCAGTGAAACGACGGCGTTTTGGACTGGGTTTGNNNNNNNNNNNNNN
Unigene0004557	1524	A	*	C	ATCCCTAACCCTAGAAGCACCAACTCCCACAAAAAGCTCCACGAACTCCGAAGCCGCACACGAAAAGAACGGCGTACCAGCTTCACCAGCTACCGCCCTCGCCAACAATGTTTTACCGGTTCCCGGTGGACCCACCAGAAGACACCCTTT(A/C)GGAATCTTAGCTCCCAGAGCAGTGTACTTATCAGGATTCTTCAAGAAATCAACAACTTCTTGTAGCTCAAGCTTAGCCTGATCAGCACCAGCCACATCCGCGAAAGTCACTCCAGTTTCTGGCACCTCTTGGAATTTGGATTTCGATCTA
Unigene0004727	745	G	*	C	CTCGCTGGACTCGGGTGCTTGGTTCGGATCCAAATCTTGACCCGGGGCAAATATCTCATCCTCGAAGCTCTTGATAACAGAGTCAAGTCCTTGAACGGCGGTGACGGTTGTTTCACGATCTATCACAGTATCTGTCTCGTCAAGTATGTT(C/G)AGTATCTCATCCGTCATCTCGTTAACTTCATACGAGTCAGGTTCAGATTCAACCCGAACGATTTCAGGCTCAGACCCGTCCGAGTCAACACACGATTCAAACGAGTTGATACGTGAAAGACTCAACTCGGACGAGTCACCATCATAATAA
Unigene0004798	1235	T	*	C	TTGCTTCTTTGAAGGATTCAAATCCTCCATAGCAACAGAGATAGGTATAGAGTCAACCAATTTAGATGCAACTAGGCAATGCCCACTAGGATTATGCCCTCCGATTCCAACTACCTGGCCAGGGAAAACTGAATAATGACTTAAATGTTG(T/C)AAGTCTAGGCGGATGCATTCCCCACCAGAATGCTCAATACTGCTCTGTAACATGACAGATTTCTCATTAAGACGGCCTTCTCCATCACAGCAAATCATGCCAACGGCAAAAAAACTTCTCGGTGAGGCAATTGTAGGGTCTGTTGGTTCT
Unigene0004798	2054	A	*	C	ACCCTCCATTTCAGCATTTTGTACAATCGGTTCATCTAGTTGTCTGTTAAGGTAATAAATTTCCCAGCTTGAGACGAGATCCATAGGACTGAGACTGTAGTTGGTGCAAAAGGTGAGACATTTTTTCAGAATCTCTTCTTCTTCGTCGAG(A/C)TTGAACCCAGCTTTTTCGAACTCCGACTTGATTTCCTCCTTCATTTCGCTTTCTCTTCTTTTGCTCTTTCTAGGGTTTCTCTGGTGGGAGGTGCTGGGTGAAAAATGGCGGGAACGTTTACCGAATTGGGTTTATATATTAACAAAANNN
Unigene0004813	896	T	*	C	ATGGAGGTTTTGTTCTTTGAGTACAGATATGAAGTATTCACGTGTTGGTCAGTCTGGCTTAGAGAGTGCTAATAACTTTCCTTTATTAACGAATGTGCTCGGAAGCGCGGCAGTAGGAGAAGTAGCTGTTTCATCTGAGCAGAAGGTCTA(T/C)GATGTGGTGCTGAAGCAGGCATCTTTGGTTAAGAGGAAGCTGAGCTCTACCGGTGAACTTGAGGTGAAACCTGAAATTGTTTTGCCTGGGAATTTGAGCTTGTTGAGTGAAGCCTATGATCGCTGTGGAGAAATTTGTGCAGAATATGCT
Unigene0004813	1241	T	*	C	AAGAGCTATCTGGGCGATATATGTGTGGTGTAGGAGAACGGATGAACTTGTTGATGGCCCTAATGCATCGCATATTACAGCAACTGCTATGGATAGGTGGGAATCAAGATTGGAAGAACTTTTCCAAGGACGTCCGTTTGATATGCTTGA(T/C)GCTGCTTTATCAGATACGGTTGCCAAATTTCCTGTTGATATACAGCCGTTTAAAGATATGATAGAAGGAATGAGAATGGATCTAAAGAAATCAAGATACAAAACCTTTGATGAATTATATCTCTACTGTTACTATGTTGCTGGAACTGTT
Unigene0004899	82	T	*	C	NNNNNNNNNNNNNNNNNNNNNNNNNNNNNNNNNNNNNNNNNNNNNNNNNNNNNNNNNNNNNNNNNNNNNAATAATAGAAAGAGTCTTATCCACAACACAAAAATAAGATCGAAGGCTTACTATGTAACACAACACAAAAGAAAAGAGTAT(T/C)ATCACAAAACAAAACCAAGAACTAGAAACCAGAAAATGGCTACTATCTTTTCCGGAGGTTCAGTTTCTCCCTTTCTTTTTCACACCAACAAGGGTACATCTTTTACACCCAAAGCTCCAATTCTTCATCTCAAGAGATCTTTCTCTGCAA
Unigene0004899	1095	T	*	C	CGTCAAGGCCGGAGAACAGGTATATATACAATATGATTTGAACAAAAGCAATGCAGAGTTGGCTCTAGACTACGGTTTCATTGAACCAAATGAAAATCGACATGCATACACTCTGACGCTGGAGATATCTGAGTCGGACCCTTTTTTTGA(T/C)GACAAACTAGACGTTGCTGAGTCCAATGGTTTTGCTCAGACAGCGTACTTTGACATCTTCTATAATCGCACTCTTCCACCTGGATTGCTTCCATATCTGAGACTTGTAGCGCTAGGGGGTACCGACGCTTTCTTATTGGAATCACTGTTC
Unigene0004932	547	T	*	C	TCTCACTTCATTGAGGCCCTTCTTCTCTTTGATTCCCAAGGCAAAAACTGCAAAGATTGTAAGGGGAATAATTGACTCGGTTGCTAAAATACCAGGGACATCTGATCTACAAATTTCACTCTGTAAGGAAATGGTGCAATGGACTCGTGA(T/C)GAAAAGCGTACTTTTCTGAGGCAACGAGTTGAGGCAAGGCTTGCAGCGCTTCTAATGGAAACTAAGGAGTATTCAGAAGCTTTGACTCTACTTTCTGGGTTGGTCAAAGAGGTTAGGCGATTAGATGACAAGCTTCTTCTTGTAGACATC
Unigene0004932	1701	G	*	C	TGAAATTATGAAAACCTTTTTCCTTTGGCGCAGAATTGAACATTTAGAATTGCTTATGGAGTGTTACATACAAAGGACTAGGAGGAGTGTGATTTTAATTAGGTTGTCTTTGGTTAAGAGGAGGGGATAAAAGGTGAGGGATGGAAAAGT(C/G)AATCTATTTTATGGCTCACAAGGAGAGGGAGGTGTTTTATAATTAATATAGTTTAGTCCTTTGTGTTTATATATATCTTTTNNNNNNNNNNNNNNNNNNNNNNNNNNNNNNNNNNNNNNNNNNNNNNNNNNNNNNNNNNNNNNNNNNNNN
Unigene0005253	3453	A	*	C	CAACACTACCGTAACTTCTAATATGATTCAATATCGTTGAAGAAAAACTAAAAGGGTGTTCAGAAAACGTAAATTCAGATCGACACAGTTTGTTTGCTGAAGTAAAAATACCAACTTGACTGAAACACAAAAACGGGTTCCTTTGGGGCG(A/C)GATTTTCTCGGGCAAATTGTTATGGTGAGAAAATCTGTGTGAAGTAGAAGAACGTGAAATTGAGATGGATTGTGAGGAGGATAAGTTGAACTTTTTTGAGGAAGCGCGTTTGGCTAATTTGGACAACATTTTGTTGGTGATGAAAGCGAG
Unigene0005261	91	T	*	C	NNNNNNNNNNNNNNNNNNNNNNNNNNNNNNNNNNNNNNNNNNNNNNNNNNNNNNNNNNNNAGAGGTATACCAAACATGTATGGATGGATTCTTAGCTATTGCAAAGATATCGGCTTACTATCATCTTGAAAATGTTCTTGATGATCTGAT(T/C)GTGTGCCTCTGCAAGTTCTTCACCATTTTGGATCCATTATCGGTTGAGGAATCTGTCCTAGCCTTTGGAGATGACACAAAAGCACGAATGGTAACTGAAACAGTTTTCACTATTGCAACTAGGTATGGTGATTACATCCGCACCGGTTGG
Unigene0005563	144	T	*	C	NNNNNNNTTAAACACACAAATTCAAAATTTCATGTATTAGAAAAGCCACAAAATGAACCAAAAAAGACCCATCGTTTCCATTTACAGGATAAATTAATCATATCCATTGATCTAACCATCATATAACTAAGCTTTCATAGAACATAAAAT(T/C)GATCGAGGGAACTTAAACTGGCATAAATACCATCAAGCTGGCAAAGAGATACGCCGTTGAATTAAGTTCCATATATGCAAATGCACAAGAAATTTGATGAAAATCAACCATGTTAAATAAAACAACAAACCATTAACCAAAAAGTTATTT
Unigene0005563	375	T	*	C	ATGCACAAGAAATTTGATGAAAATCAACCATGTTAAATAAAACAACAAACCATTAACCAAAAAGTTATTTAGTTTACACAGTTCCTGAAGACAATCGAGGATCAAATTCAGCTCCAACGGCGGGATCAGAATCTTATTTGCTGGCGACCG(T/C)AGCAGTAGCATGTCATTATATTGAAGTTCCAAGATATAAATTAACCGAGAGAGTAAACCATGCGCTCGGATAACACTGCACCCACAACCCTCCTGTATTTCTGCAACTGTGACTCCAAGTATCTCTGCTGCTCAGGACCCAACACACTTC
Unigene0005740	936	T	*	C	CAACAGGAAAATCTTCAGTTGGAGCCACAGCATCTGACTTGCTCTTCCTCACAATGGTCTTGATGACTCCTCCATCCCCAGACAAATCAATTGCGTCTCCCATCGTTTACACACGAGAGTGATGAACCTTTGTTTTTCTCAGCTGAAGGC(T/C)GAAGAAGCTTCTGGAACGAATTGGAGTGATAGAGTGACGGGGTTGATAAACAGCGACGAATTTTGAAGAAGAGGAGTGGCCATAGGCGTTCGATGAAACTGATTTTCAGAGTGGGAGATTGGCGTTAAGAATGAAATAGAACGGTGGTAG
Unigene0005790	246	T	*	C	ATTCCATTCCATTCCTTCTTTTCTTTTTCACACACAAGCACAAGCACAAACACATCATTCTTCACACAATTCATCAAACAAAACAAAAACCTCTTCACCTTTTTTGTCTCTCATGGAACGTTACACGCTACCCTTACCACAAGGACTTCA(T/C)AATTCTCTTACTATACCTTGGTCTGAACCACAGCAACAACAACAATCACCTTCATGGTCCACACCTAACTCCGAACCTAAACTCAACAACAACAACAACAACGACCAAGACATTGCCATTGCTATTGCCATGGCTGCTTCTACTACCTCT
Unigene0005862	714	T	*	C	TGTGCTAATTACATCCTCAAATTGGCTTTACCTTGCTGATTTTGCATCTTTCAAACCCACTTACATTCCGTATGATGACCCATCTGATTTCTCTTTTTTCTTTGACACGGGTGGAAGAAGACTCTGTTATCTGGCGCCTGAGAGATTTTA(T/C)GAAAATGGAGGGGAGATGCAGATGGCACACGATACCCCCTTAAAGCCATCAATGGATTTATTTGCTGTCGGGTGTGTAATTGCTGAACTTTTCCTTGAGGGCCAACCACTATTTGAACTGTCTCAACTTCTTGCATATCGCAGAGGGCAA
Unigene0006107	599	G	*	C	AATAATTTCAAATTAAACTCTTATTTGCTCTCCATGTATACCACAGATGTGTATAGTAAATCACAAAATTTGGACCTTTTGTCCTTGACAGTTACCCTTTTGGCCACAGGTTCCCAGCTGCAAGAGCACAGAAGTTTCTTTTACGAGTCA(C/G)TCTACCTCTATAAACCGGTTTCTATCTTCACTATTGCCCCAAAAGTTTGGTCTACAAGGTGAACCCAACTGCAACATCCTCACAAAATCCCTTGAAATTAGGCATTATACCAAACATTTCTTTGAAACATTGTTTATAAGAAATGAATGC
Unigene0006107	3593	T	*	C	CCGTTGCACTTCCGGCTGCGGCTGCAGCTGCCTTCTTCTCCTTTTCCTTTTCTTTCTTCTTTTTCTTCTTTTTTGCAGCAGCTGATTCTACAGTCTCCTCTTCTCCCTCTTTTTCCCCTGAAGCAGCAGGGGCAGAACCAACTTCCGGAG(T/C)AGGCTGGACTTTATCATCCTGCTTTGGAGGAGCAGAAGGTTTTGCTGTAGGAGGGGCTTCACCAAGCTCTGCAAGAATCTTATCTAAATCATCCTCCTCTTGAGCAGTTCTCCCACTCTTTTTCTTATTCTTCTTCTTATTTTTGGAAGT
Unigene0006209	933	A	*	C	ATCATACAAAGATGATAACAACAGTTTGATCTTTACAAGATTTCTGTTGCAATATCTGAAAACGGCTACTCAAACCAGAAACGCCGATTACAGAAGCAACAGCGAGTATGCTGCTCTTGCAGAAACAGCGGCTTATGGAGTCATATTTGT(A/C)GGTAAGAAAAACTTCTCTTGCAGAGGTCTTTTTTGGGTATTAAGGATTGTTTCAAGATTCGGGTTGAGCAAAATTTGCAGAACCGAGCTAGAGAAATTGATTGGTGGAATGCTCGAACAAGCAACGCTGGATGATCTTTTGGTCTCAGGG
Unigene0006227	205	G	*	C	TCAAAAAATATGAGCGTGACCATTACACCATATATCCAATCTACCTAAAATCAGAAGTCACCATCTTACATAAGATTACATCAAGCTTTACATCAGTTCAAGCATGGTTAGCTCCATATGCAAATCTGCTATGGCTGAAATCCAGGATAA(C/G)AACATTGGTGCTATTCAAATATATATGCAGGGTTTGCCATTGTGTGAAAAGCTTACCTCCCCCGTACACTGGCGGGAGATTGACCGCATCTCTCACTGCCAATATCATCATCTATCTCGCTAGAATCTAAACATATACCATTTTGGTTAA
Unigene0006284	872	T	*	C	ATTCATCTCTTTCTGAAGCAAGGGTCCCAAACAAGTCCCCGGATGAATCGCCACCACGTCGATACCACCGTCCCCGTCGTGCTTCTCACGAAACTCCCACGCGGCTTTCTCCGCCTTCGTTTTCGATACCGGATACCACTTCCCTCTCGA(T/C)GAACAGTACTCAACGTCCGTCCAGGAAGATTCGTCGATCGGTTTGTTTTCCGGCCAGTTAGGGTTTGGAATCATGGCTGAAATGGAGGAGGTGAGTACCACGCGCTTTACTCCCGCGCGTTTCGATGCTTCTAGGACGTTTAGGGTTCCG
Unigene0006421	771	T	*	C	TGCAGTTTTCATATCATCAATCTCCTTTTGAGTTGCCTCCAATTTTTTCAAAATTTCGTTTTCACTAGCTTTCACGGCTTCTACCTGTGCTTTGGCAGCATCCACTTTCATGTCTGCTAATTTATCAGATTCCTCGACTTTGCGGTTTAG(T/C)GACTCAAACTCCTCTGTCGAGATTGCAATCACAGATCCGGATTCTGACGATGTTGATGCACGTGCAGCACTAGTCCTTTCGGTTAGCACTGTAATCTGCTCGACAGCACTGGCTTCAGCCGCTTTTGCTGCTTCTGCTTCTTCTATTGCT
Unigene0006432	439	T	*	C	GCAAGAACATAGCGTCAAGGTTGAGGTTTCACCAAAATCTCCCACTCCTTCTCTCCCAATCTTTGGCCATGCTGTGAGTTGTTCTGAGATTATGAAAGATTCCATGTTGGAGACCCCTGCAAAGATGTTTATCCCGAATGTGCGTTCTGG(T/C)AGCTATGCTGATATTGGACCACGGGGATCCATGGATGATGAACACATTCAGATAGATGATCTAGCTTGCCACCTTGGGTTTGTGTTCAAGTGTCCAATACCAAGTGCATTTTATGCAGTTTTTGATGGGCATGGAGGGCCTGAGGCTGCT
Unigene0006432	1138	T	*	C	AAAGTTTCCACTTGGTGCTGCATCTCCTCTAATTGCTGAACCTGATGTTCAACTGGTTACATTGACAGAAGAGGACGAGTTCTTGATCATTGCGTGTGATGGGATTTGGGATGTAATATCTAGCCAAGTTGCAGTTAGTCTTGTTCGCCG(T/C)GGATTAAGAAGGCACAATGACCCACAGCAAAGTGCCAGAGATCTAGTTAAGGAAGCATTGCGCCTAAATACATCAGATAATCTCACTGTGGTTGTTATATGTCTGTCCCCAGTTGAAAGCTTTTCTGAATCATGTCCCCCACAAAGGCGA
Unigene0006432	1450	T	*	C	TTGCAGTATTTCTGAAGAGTCTCGAAATAGATTGAAGAGCTTAATAGAGGGAAATTGACTGTAAATGTAATTCTTGTGATTCACCATATGTTTCTTTGATTAAAAGATTAATCTGTCTTTTAGGATGTTTCAGAAATGTAGCAAAAGCAG(T/C)GACAACAGTTTTGTAGGGATAGAAGGGTGTAGTTGGTGAGGGGTAGAGGAGGTTTAGTGTTAGACCTATTTAATTGGAGAGGTGTTAATGGGTTATTATGTTGGTATCTGTAGAGAGAGTTGTAGCTAAATTTTGGCGGAGTAGATTAAA
Unigene0006432	1482	G	*	C	TGAAGAGCTTAATAGAGGGAAATTGACTGTAAATGTAATTCTTGTGATTCACCATATGTTTCTTTGATTAAAAGATTAATCTGTCTTTTAGGATGTTTCAGAAATGTAGCAAAAGCAGTGACAACAGTTTTGTAGGGATAGAAGGGTGTA(C/G)TTGGTGAGGGGTAGAGGAGGTTTAGTGTTAGACCTATTTAATTGGAGAGGTGTTAATGGGTTATTATGTTGGTATCTGTAGAGAGAGTTGTAGCTAAATTTTGGCGGAGTAGATTAAATCCCTCATCACTGTGGTTTGATTTGATTATGT
Unigene0006552	178	G	*	C	TTCTTTTATAATACAATATACATACTAAACAACTGTACTTCCTCACTAAATCATCCCTATGTTTAGGGGTACAAGATGTCAACATCTTTTCTAATATACCCGCGTCACATTCCCTTGTAAACACAATACCCACAAAATATTCACCCATAA(C/G)AGGTTAAATATTAATTTTAAAATATAAATAAAAAAACCACTCTACTTGCAAACTAGTTGGGAATTCGATCATCTGTAACTAGAAAAAGAATCCAATACAAAATATGCATTCTGCAACAATTGCAGATATTTGAACAACATTTGGTGGGGG
Unigene0006552	2410	T	*	C	TCTATGCATGAGCAGTCCATAGGCGTCTGCTAGTGGAGTTCCAGAAGAGTCTCTTCCACCACAGAGTAAAAACATTCCATCTGTGCGGGCACTAGCAGTCGCATACATTCTAGCAGAAGGCCTGTCGCCTTCTGGGTTCAGCTTCTGCCA(T/C)GCATAAGGCTTTTGAGCCGTATCTAAAGTCCAAGCATCAGATACAACTCGTTTTCCATCATTTCCGCTGACGGTAACAAGATATCTCTGAGCAACCAAGTCCATTACATGGCCGTAGCGAGGCCCCGGTCCCTGCCCTTGTACAACGACT
Unigene0006594	398	T	*	C	GTTTCCGAGTAGCTGGAGAAGCAGGGGAATCAATCCATCCTCATTTCCAAATTCCACCAGAAAACGGTTACAGTTACGGTTTTTTGCTTCGGGGAAAAATGGCGTCAATGGAGGTGTTGTGGATGAGATATCTGAAACAGTAAAGGCGCA(T/C)ACGGATTTCGTTTGGCCTGATAACAAGAAGCCTAGAGTGTGTATTTTAGGTGGTGGATTCGGTGGTTTATATACTGCTTTAAGGTTGGAATCACTCCAGTGGCCCGAAGACAAAAAGCCACATATTGCTCTTGTCGACCAATCTGAACGA
Unigene0006676	829	T	*	C	ATGCCTTGGGACATTTAGCAACTGCCCTTACATGGTATCTTACGTCTCTGCTGAAACCTCTACGTCTGGAATACTAGTGGAGGACGTTCTGCACTTAACCCAAGAAGATGATCATCGTGACCTTGTTGAGGCAAATGTTGTATTTGGATG(T/C)GGACAAGTTCAGAGTGGATCGTTCTTAGATGTTGCTGCTCCAAATGGTTTGTTTGGACTTGGTATGGAGAAAATATCAGTTCCCAGCGTGTTATCGAGGGAAGGCTTTACAGCAGATTCGTTCTCCATGTGTTTTGGACGAGATGGCGTT
Unigene0006688	2162	T	*	C	GCAAATATGGATTCTCATCGTCATCAAATGCATTGCGCACTACCCATTTCTCTATCCTTTTAAGATCAGGCCTTATCAATTTCCACTCAGGATCGATGGCCATGGCAGTGCTGATGAAGTCTTTATCCAAGAATGGTACACGTGCCTCTA(T/C)ACCCCAAGCGGAAGTTGATTTATTGGCTCTAAGGCAATCATAAAGATGAAGTGCTTTAATTTTTCGACATGTTTCTTCATGAAGCTCTTCCTTGTTAGGTGCCTTATGGAAATACAGGTAACCCCCAAATATTTCATCTGAACCTTCTCC
Unigene0006719	3396	T	*	C	GAAGAACTAGATATGGAATTGGGTCAATTACTTGATGTTGATGAGCAAAAAGTTGTTTTGTCCTTGATAGACAAATACCATCACGTGCTTATACAAGGACAAGGTTTGCCATCGCAGCTCATCACGAGTTTTCTGAATGCCTTCCCTGAG(T/C)ATGGTTTGTATTTCCAGCAAAAATGAAGTTTGTTTTAGTTCTATATCTCGGTGTTGTGTGTAAATTATTCCCTCTCAAAAATCAGGGTTTAGAAATGCTTGTACAAAGAAGCAGGTATTGTTATTTTTATTGAGTTTTGGGGGGAGTGTG
Unigene0006759	743	G	*	C	GCAAAAGAAAACGGTGGAGCTGTGTTTCAGGTAAATGGAAACCATGAGACGATGAATGTGGAAGGGGATTTCAGATACGTTGAATCTGGTGGATTTGATGAATGTAGTGATTTCATGGAATATATCAATAATTCTGAAGATGACTGGGAA(C/G)AAACATTTACTGGTTGGGTCGATGTATCTGAAAAGTGGAAAGGAGATCGAGCAATGTCAACAAGTAATTGGGGGCCTTGGAATTTAGTGAAGAGGCAAAAGGGAGTCATTGCTCGATCAATCCTCTTTAGGCCGGGTGGGCCACTGGCAT
Unigene0006759	1383	T	*	C	ATTGTAAATACAATTGTAGCATATGGCGCGTAGATGTTGGAATGTCCAGCGGAGTCCTTAATTCAAGACCAGAGGTTCTAGAAATTATAGACGACAAAGCAAGAGTTATCAGGAGCGAAAGGGATACATACAGCGAACTTCAAGCGGCTG(T/C)ATATACTTAACGACAGACAATTCCGAAAGCAGGGAAATAAAGCTATTTCTGAGTATTATGCTTCTGCAGAATTGAAGGCAAATATTTTTTTTGAAGTTAAATATAGCCTGTTAATGACTTGAAAGCAAGGTGAAAATAGGATGCAGAAGA
Unigene0006797	1688	T	*	C	ATTCTTCAGAACATAAAAAACACAACAGCAATTAACTAGTAAACTAGTTAAAATGTGTAGCACTAGTTATATATTAGCAGAATCTAAAACAATTTGATGTAATGTAATAATTCTGCTGTCAAGCTACTGAAGGCACAAGTTTGCCTTGTA(T/C)AACTACTAGCATTAAAGGGATTTGATAGAAACACTCTTCTGCTTAGGCAAATTATACATGAATATGATTTTAGTGTTTACNNNNNNNNNNNNNNNNNNNNNNNNNNNNNNNNNNNNNNNNNNNNNNNNNNNNNNNNNNNNNNNNNNNNNN
Unigene0006902	487	T	*	C	TAAGCGTGCCAAATACAAAACCACTGTCAAAGATCCTGGCACTCCCGGCGTACTCAAAGTGACTCGAGAAAAGTTTGTTTTCAAGCCTAACGATCCAACATCAAACAACAAGCTCGAAGCTGATTTCAGATTAATTAAAAATCATAAACA(T/C)ACCAAAGAGGGATCGAACAAACCACCGTGGCTTAACCTTGCACATTCTCAGGGAAGTTACATATTTGAGTTTGAAAGCTTCTCAGATCTTCATATTTGCCGGGAATTAGTTGGTAGTGCCCTTAGCAAGCATGTAGAACCCTCAAAAGTT
Unigene0006902	550	A	*	C	TCGAGAAAAGTTTGTTTTCAAGCCTAACGATCCAACATCAAACAACAAGCTCGAAGCTGATTTCAGATTAATTAAAAATCATAAACATACCAAAGAGGGATCGAACAAACCACCGTGGCTTAACCTTGCACATTCTCAGGGAAGTTACAT(A/C)TTTGAGTTTGAAAGCTTCTCAGATCTTCATATTTGCCGGGAATTAGTTGGTAGTGCCCTTAGCAAGCATGTAGAACCCTCAAAAGTTGTTTCTGATGAACAGCTTAGTGCTTCTGAAATGACACTGAGAATTAAGCTATTGCAAGAAGAT
Unigene0006910	121	A	*	C	NNNNNNNNNNNNNNNNNNNNNNNNNNNNNNGTCTGATCGGGGTCGGAAGCATGTTCATATAACGGGCCATAAAGCTACTAATTTGGCATGTGAAAAAACAAAATAGGAAAATTAGAAGAAATTAAAATTAAGTAGGAATAGTGTGATGGT(A/C)TCCACATTCACAACACAACTTCATCATCGTTCTTCTCTGCATCGTTAACCTAAAGGTATAGTTAGGTTAGTTCTTTGAGTGTGTGCTGGAATGGCTGCTACATCTGGGATAGCTGAGGAGGACACGCTAGTGTCTTCCAGTGACGACATC
Unigene0006910	349	T	*	C	AGTGTGTGCTGGAATGGCTGCTACATCTGGGATAGCTGAGGAGGACACGCTAGTGTCTTCCAGTGACGACATCGATCCCAGGCTGGATGTCTATGTGTGGGACATGGATGAGACCCTTATACTACTCAATTCCTTGCTGAAATCATCATA(T/C)GCTGAGGCTTTTAATGGTCTGAAGGATGCGCAAAAAGGTGTCGAGCTTGGGAAGGTGTGGGAAAATCTCATTCTACAATTGTGCGATGATAATTTCTTCTACGACCAAATTGAAAATTACAATAAGCCGTTTCTTGATGTTCTGTCCAAA
Unigene0006910	364	T	*	C	GGCTGCTACATCTGGGATAGCTGAGGAGGACACGCTAGTGTCTTCCAGTGACGACATCGATCCCAGGCTGGATGTCTATGTGTGGGACATGGATGAGACCCTTATACTACTCAATTCCTTGCTGAAATCATCATATGCTGAGGCTTTTAA(T/C)GGTCTGAAGGATGCGCAAAAAGGTGTCGAGCTTGGGAAGGTGTGGGAAAATCTCATTCTACAATTGTGCGATGATAATTTCTTCTACGACCAAATTGAAAATTACAATAAGCCGTTTCTTGATGTTCTGTCCAAATATGATGATGGGAGG
Unigene0006964	3494	T	*	C	CTCTGATTGGCACATGGTAGAAGAAAAAGTAGTAGATACTACAGAAATGTCAGTGTCAGCTATTGCACTCTCCGGCGTATCTGTTGAGTATTTTACTATCATTTTAGGCAGGGTGGCACCCTCATCAGCAAGGAACGAGGTCTCCAGAGA(T/C)AAATGATAGGCTGCAAATATTGCATATTGCACCACATGTTTAATTTTTTTCAGTTCTTTACGACATGAGCCCTTCAGTAAGACCGTGCATCCCAAACGCCGCGGGCAACCTTCAAAGAACATTAAAGTTTTGGATGGCTTTTTGTTGGAC
Unigene0007056	468	A	*	C	GCAAGACGTGCTTACCATCATGCTCCTCCACGAAAAGGTGGTTGAAGTTCTTAACCCTCTAGCACGTGAATTCAAATCGATTGACACCATGAAAAAGGATCTAGCTGGATTGCAGGACGAATTAGCAGATGCACACAGACAGGTTCATAT(A/C)TCCGAAGCAAGGGTTTCCACTGCTTTAGATAAACTAGCTTACATGGAAGAATTGGTAAGCGATAGGCTATTGCAAGTGCAAGTGCAAGACCGAAGCACGGATGAAGTTGCCGAGACATCCTCTTCTCCGAGTACTTCTGCACAATCTGTA
Unigene0007065	1902	T	*	C	AGCAAAATGCTGCTCCAGAACCGATGACAATGATGTTAAATGTCCGCCATATTTATTACAACATGTCTCTGAGTCATTCCAAGATTGAGGCCTCCCAACATGGAGAAAGCATTTGGTCTTATTAGGGTCCATAACCCAACCATTTGGGCA(T/C)GGTGCTTTGGTGTCTCTATTGAGTGAACCATTGAAGTAACCACAAGTTTCATTAAGATTCGCATTGGAAGCGATTCCAGGAAGAAGAAACAACGGTAGAAGAAGGAGAAGGAATTGCAGAACCGTGAGATTGAGTTCCATGGAGAAAACC
Unigene0007069	393	G	*	C	ACAAAATCAGTGAAAAATAGCTTGAATTCATCATCTCAATCAACGGTTTCTTATAATAGAAAACATGGAGTTTGTTTTACCAATAATGTTTTCAAAATTGGGTCAGTGAGGTTTTTTGAAAAGGGTCATCAACAAAGAGGATTTAGGTCA(C/G)AAAGTGGGTTTGGAGGCTCTAAAAGACTCAAATTCAAGGTTAATAGTGGAAGGTATGGTGATTACGTGATTAATGAAGAAGAAGCAAGAGATATTGTAGGGATAGATGAACCTGCTTCTAAGGTTTTGATTCCCGGTTTGCCTGATGAGT
Unigene0007070	82	G	*	C	NNNNNNNNNNNNNNNNNNNNNNNNNNNNNNNNNNNNNNNNNNNNNNNNNNNNNNNNNNNNNNNNNNNNNGTGAAGGGTTGCAGAGAAGTAAATGGAGAATATGTCAAAGCCAGCAGTTTCCCCCAATCCAATGATTTTGAAGAGTGAGGG(C/G)TTACTCAAGTATATACTAGAAACCAGCGTTTATCCACGAGAAGCAGAGATTCTCAAAGAGCTAAGGAATGCAACCACAAATCATCCTCTTGGCTTCATGGGCACTTCACCTGATGTGGGTCAGCTAATGGCCTTGCTCTTGAAACTTTTA
Unigene0007408	352	T	*	C	CGGTTTCGCTCGCGAAGGTCGAAGTTACTATGCAGAAAACGCGAAAGATTCATTTCCGGTGTTATTGGATCACTTAGGTTCATCCTTAGTTGATCACTTTTTCATTTCTGGTAAAGGAGGAATAAATTGGGTTGAATTTGTGAAAGGCTA(T/C)AACAAGTGTTGTGCTAGGGTATCTGCTTCCACTTTGCTGAACAAGTTTATTAGAGTATTCATTGATGTTACAAGAAAAGCTGATGTGCCTGTGAATTTGGAATTTGAATCAGAGGATGCTGATTGCAAGGCGAACGGGTACCTTCTTCCC
Unigene0007408	607	A	*	C	TGAATCAGAGGATGCTGATTGCAAGGCGAACGGGTACCTTCTTCCCAACCATGTGTTTCTGCTTCTTTCCGTATGTTGGGCTATGTCTTGGGATGGTAGAAATTTGAAAGGGAAAGGAAATGTGAGTGTACCTGATCTGAGTCATTTGGT(A/C)TTGTCAGCGGTTACAGCGTGCGTTGAAGATAAAGATGGGTTTGATGTATGGAATTGTGATATCTCGAGCTTGGAAGTTCAGCTTCCTGCTGGGAAGTTTGTTACATGGGTTATGAGTACAGTGCCATGCCTCCCTGATTGCTTAAAGCTG
Unigene0007588	430	T	*	C	AGAAGTGGCAATTAAAAAACTTTCATTGGAATCTAGACAAGGAATTAGAGAATTTACCAACGAAGTTCGGCTATTACTAAGAATTCAGCATAAGAATTTAGTCACTTTACTAGGTTGTTGCGCAGAAGGACCCGAAAAAATGCTTGTCTA(T/C)GAATATCTACCAAACAAAAGCCTTGATCACTTTCTGTTTGATAAAAAGAGGTCTTTGGATTGGACGACACGGTTTCGAATAGTTACCGGTATCACAAGAGGACTTCTCTATCTGCATGAAGAGGCCCCGGAAAGAATTATTCACAGAGAC
Unigene0007590	207	T	*	C	TTAAAGAAGGAACCACTGTTGTAACAAAACACAAACTTCAAAAACGGTTCCTTCTCAAATATTGACTAGCCTTGAATCAAAACGAAATCAACAAACTATGGGAATACTATACGACGACGTAGTGATTATCAGGCCACCAGAAAAAGAAGG(T/C)GACCCAACTATGATTACTGTGAATTGCCCTGACAAAACCGGTCTTGGTTGTGACTTGTGTCGTATCATACTCTTCTTTGGTCTAAACATTGTTAGAGGAGACGTGTCAACTGATGGAAAATGGTGCTACATAGTTTTCTGGGTGGTTGGG
Unigene0007766	62	G	*	C	NNNNNNNNNNNNNNNNNNNNNNNNNNNNNNNNNNNNNNNNNNNNNNNNNNNNNNNNNNNNNNNNNNNNNNNNNNNNNNNNNNNNNNNNNAGAAAAGAAAAGAAAAGAAAAGAAAATAGTGTGATATTTCTGGGAAGCTTCGCGGGTGTGA(C/G)TTCGTTCCCACTTGCAGCAGGCCATTTCATTTCATTTCATTGAATTCAAATCAACGCCAAATATGAATGAATTCATAGAAAAAAAAAAGAGATTAAGAAGTTGTTAGTAATATTGTGGTGTGGGGTCCAGCTGTATTGTGTTACAGTCAA
Unigene0007767	140	A	*	C	NNNNNNNNNNNAATTTGAGGGGTTCACAAGACTCAACAATTAAAGATTGTGATCCATGCCAACTTTGTAACAGTAATGCCAAACATGACAGCAACTACATAATCTCACTTTTAACAGAGTTAAAGGTTTCACCAAAAGCAAAAGTGAATG(A/C)TAAAGCAAGAATAATAATGACTTCAACAAGAATCTACAGCCAAATAACTCTAATGGAACAGATATGCATTATACACTCCCCTAAGATAGTAGTAGTACAGTGGAAATTGTAGAGGGAAAGAAGGAAATACATCAAAGTTGGAGGGTGTGC
Unigene0007767	360	T	*	C	TATACACTCCCCTAAGATAGTAGTAGTACAGTGGAAATTGTAGAGGGAAAGAAGGAAATACATCAAAGTTGGAGGGTGTGCTAATGAAAATTGAAGCCAAAGCTAAAAAAAGTTAAAATTCGCTCTAGGCCCCTAAACTATTTTAAATTA(T/C)GCTTCGAGACCTATAGAATAATTAAAACCTAAATAAAGTTACAACATAAGCACACATGATTAAGGAGAAAAATAGATAAGGGGGGCTTCTGAGATACTCATCTAGAAGAGATATCATCTATGTCATTGATAAAGTCGGGGTGTTGAATTT
Unigene0007767	599	T	*	C	CTGAGATACTCATCTAGAAGAGATATCATCTATGTCATTGATAAAGTCGGGGTGTTGAATTTGGTCTTGAGTACCCTCTTTCAAGCTAGACTTATGCAACTCCTCTATGTGCTGTCGTACTTGCGACATTGAAGGGCGGTTATCAGGGTA(T/C)GTTGCTGCACAATCTACTGCGAGTTGCAACAGCTGAACCATTTCCTCTTCGACATTTTGGTATCTTAGGAGTTCGAGATCAAAGACCTCGGAAGTCCATTCTTCTTTAACGACTGACTGCACCCATCTCGGAAGGTCCACTCCTTCGTCG
Unigene0007805	158	T	*	C	GCGGCAACTAGAATTGAAAGCGTAAAGTGAAGAGAAAGAGGGTTTGGCGGCAGCAACAATGGCGGTTTCCACTCCTCTATTTTCCTTATCTTCTCTTTCTCTTTCTTCATCTTCATCTCTTCACCCTTCAAAACTTCACTCCCCTTCTCG(T/C)AATCCATCTTCCCACATCAACCTCGCTATTCGCTCTTCTTATTCCGGAAACGGTTCTTCCCCTGATGCCTTCAATTCCAGGAACTCTGAAATTCCATCCATGTCTCCCTTTACTATGTCAATGGCTGAATCGAACAAGCCCAGGTGGCGA
Unigene0007940	270	G	*	C	CATCAACATGCACTTCTCACATATTTGTGTTAGCGAGTAAGAGAAGATTTAAATGTCAAATACTATCTAACTATCATTAATTTTGAATGTAACATCTTTTATTGTTCTGCATCCTTCCTATGTTGTTGGTTTGTTCATCAACATTCTTAA(C/G)TTTTGTCTTCAACAAATGTGGTTTCAGCTTGTTTACATCTGATTGTTGAACTGGTTTCAGAAAAAACTCTTCAGCTCCTTCTTCTAAACATCTGTTGATTCTTGATGGAACATTCTCTGATGACATAATCACAACTGGTATGTCTTTAAG
Unigene0008001	546	A	*	C	TACCAAGACGGAATTCTCCGTCTCAAGATCGATGAAGATTCTTCCCTTAACCCTCCCAAGAAACGCTTCCAAGTCCCTGATGTCGTCGTTTCACAATTCTCCAACACTAAACTCTGGCTTCAACGCCTCACTTCCGAAGATATTAACGGT(A/C)TTTCCTCCGCTGTTTACCTTTCAGACGGTTACTCCGCTGTTCTCCGTCACGATCCATTTGAACTCTTCATCCGTGATGATAACTCCGGCGACCGTGTAATTTCCCTAAACTCTCATGGTTTATTCGATTTCGAACAGCTTAGAGAGAAAA
Unigene0008001	821	T	*	C	CGATTTCGAACAGCTTAGAGAGAAAAACGAAGATGAAAACTGGGAAGAGACTTTCCGCTCTCACACCGATAAAAGACCATACGGTCCTCAATCGATTAGCTTTGATGTATCGTTCTATGATGCTGATTTTGTTTACGGGATTCCCGAACG(T/C)GCTACAAGCCTCGTGTTGAAACCTACCAGAGGACCTAATGTGGAAGAATCGGAACCTTATAGGCTTTTCAATTTGGATGTTTTTGAATACATTCACGAATCGCCGTTTGGACTCTATGGTTCGATTCCGTTCATGCTTTCTCACGGGAAA
Unigene0008001	1307	T	*	C	TGTTTTGAGACAGTATGCTGCGGTAACCGGACCTTCGGCCCTGCCTCAGATGTTTGCAGTGGCTTATCATCAGTGTCGGTGGAACTATCGTGACGAGGAGGATGTTGCGAATGTTGATGCCAAATTTGACGAATATGATATTCCTTATGA(T/C)ATTTTGTGGCTTGATATTGAGCATACGGATGGGAAGAGGTATTTTACTTGGGATAGGGTCCTTTTCCCTAATCCTGAGGAGATGCAGAGGAAATTGGCTGGTAAAGGGAGGCACATGGTTACCATTGTGGATCCTCATATTAAGAGAGAT
Unigene0008214	2223	T	*	C	TGTTACCTGGAAGGTTGTTTAAGTTTATACAAGAACATGATTTAAACCACGCTTCATCTATATATGATTTAGTTTGGGTGAGTTATGGAACCTGATTAATGGCATGATATGGTTTTTATTTGCCTACTTGTAGAGTATAGTGTGAAGGCA(T/C)AATCAATTTTGCACTTATGCCATTGCACACAAGATCTTCCATTGCAAGTAGCTACTTCCTATAGGGAAGTGATTATGACAGAAGGGGAGTTATTTATTGAGATGTCTAATAACTTATAAGAACTATTTTTTCAATATTTAATTTGAACAG
Unigene0008259	1001	T	*	C	TACAAGCACAGAGGACTCATTGATGAGTTTTGCTATCTGGGAGCCACCTCACGGTCGTTACAAAATGTTTCGATATCCATGGAAGAATTATGTTAAAGTAAGTGGAGCGCTTAGGCATTGTGCATTTATGGTCATGGCTATGCATGGATG(T/C)ATACTTTCTGAAATACAGGCTCCAGCAGATAAGAGACAAGTTTTTCGCAACGAACTAAAGAAGGTAGGTTCTGAAGCAGCTAAAGTTCTACGCGAACTAGGTAACAAAGTTAAGAAGATGGAGAAACTAGGGCAAGAAGACATTCTTTTC
Unigene0008397	153	T	*	C	TCAATAGCTTATATATACACATGAGCTTTTCATGCACATTCATAACATTCATTACACACCACACAAACAATTAAAAAGATTAATCTGAGACAATATGGCTTACGTGAACGGTTCTGTCGGTGGTGGTGTTAAGGATCTCTATGGTGAAGA(T/C)AGTGCTACAGAAGATCAACTCATCACACCATGGAGTTTCTCTGTGGCTAGTGGATGCACTTTGCTCAGAGATCCACGTTACAACAAAGGTCTTGCTTTCACTGAGAAAGAAAGAGATGCTCATTACGTTCGTGGCCTTTTGCCTCCCGCT
Unigene0008795	4491	G	*	C	AGAGAGAGAGAATCAAATCATGGTTGGAAAAAAAGGTTTTTGAAGGTTGGAACTTTTGTGTGTGTTACTGTGAGATTCAGAGAGGGGGGACAGGTTAAGGAAAAGAATCAATGGTTTTGTTTGGGTTCATAGTTGGATTTTTGTTTGTGA(C/G)TAGAGAAAAGGATTTGGGACTCTATGTGGTTTTAGAGTGCCTTGGGATTCATTTACTTTAGATGAAATGCAAAGAAAGCTTAATGTGAATGTGATGATGCCTCTATACTATAGNNNNNNNNNNNNNNNNNNNNNNNNNNNNNNNNNNNNN
Unigene0008904	931	T	*	C	ATTAAAAGCCTGCTGAGGCTCATTTGTGGAGTAAATATCTCCAGTTTCCTTGGATACCATCCACCCACTTGAATGATCCAATGTAGCATCAATTGCACCATCACGAATAGCCTTTGATACAATGCTCTCAGCATCAGCAACAGGATTTGG(T/C)GAGTCCAACCTCAATTTTTTAGCAACATCAGCTAGTGAGATGCGAGAATATGAGATGCTGATGTTACGTAAACCTGTCCTGATGACATTATGCCGCAGGCGAACAATCAAATTGTGGGTTCCGTCTGCACTGAAGGTGGTTGCAAACTTA
Unigene0008904	1000	T	*	C	TGAATGATCCAATGTAGCATCAATTGCACCATCACGAATAGCCTTTGATACAATGCTCTCAGCATCAGCAACAGGATTTGGTGAGTCCAACCTCAATTTTTTAGCAACATCAGCTAGTGAGATGCGAGAATATGAGATGCTGATGTTACG(T/C)AAACCTGTCCTGATGACATTATGCCGCAGGCGAACAATCAAATTGTGGGTTCCGTCTGCACTGAAGGTGGTTGCAAACTTATCTGCAATGTTCTTAAACAGCTCCAAGTCTCCAATACGGACAGCATTTGTAAGCTCAAAGTAAGGCCTT
Unigene0008956	328	T	*	C	TTATCTCAAAAAAGTGAACTTATAAAGGATCGGAGGGAAGTATCATTTTCCAATTACATCATATGCATCAACTAAAACTTAACTCTCAGATTTGAGAGTCTCACATTATAGGAGATATGATCTAAAACCCTTACTATATAACTGGTTTCG(T/C)AGGGTTGAATTAAACCGAACCTAAATTTTAATATAGCGAAAAGATAAACATAAACATAACACCAAATGTGTCTAGTTTTGGTTCATTCAGAGCTTTGCAATCAGCTCATTCTGAATAGACTTAGCAGGCATCCCAATTTCCTTATCATCC
Unigene0008966	171	G	*	C	ATAGAAAGGAAACAAATCCCAGTGTCGGTGATGAAATGCTAATGATAATACTCATACATTAGTGGAACTCTAGCCTCTGCAACAATATAGATCACATCTTCAAAACTTGAATTCGAATTACTACTAGAGATTCCAAAAACAATACAACAA(C/G)TCAAAATCATCTTCTAATTCTACACCGATAAGATAATAATAATAATAATTAACAACACTTTACTACTACACTTTTTTTTTATTGCAGCGAGTGTGTTCTATTCTACTTGCATTGCATTCACATTCACATTCACATTATCGTTTTCGCAAA
Unigene0009053	326	T	*	C	GCAACTTGATAGAGACTGTGAGTTTCTGGAAGCGGAAGGAATCATGGATTATAGTCTTTTGATTGGCCTTCATTTCCGCGATGACCACTCAGTTGATGAAACGGAAAGTTCACCGCGTGATACACTGTCAGGCAAGAGAGATATGCATGA(T/C)GATGATACGCACATACCCCGCGGTCCTCTAATCCGGCTAGGAATGAACATGCCTGCCAGAGCTGCGAGAATGTGTAGCGGAAAAAGCAACAATTCTACTCCTTCAGAGAATACTAGTGAGATCTCTGATGTAATCCTTTACTTTGGTATC
Unigene0009089	777	T	*	C	TTGAGCCAAATGAGAAGTGCCTACTCAGAAAAGGTTTCCCAGAAGAGCTTCTTTTGCTAGAACTAGAGTCCATTCTAGGACTTTTACTTTGACGCTTTTTATCTTTAAGCTGATCAAATACAACAGAACCGTCATCAATATCATTATCCA(T/C)AATTTGGTTCCTTGATTTCTTATTTCGAGCTTTTGAATCCATTTCTGCTTTCAAAGTTTTTTCAAATAATTTACGAGCTTGTTTCTCGCCAAAAGTGCAAACAGGGCAAGCTGGATCGTACTTGTTGATTTCAGGTGTCATACTCTCTAA
Unigene0009089	1928	G	*	C	ACATTCCTATGCCAGATTTCACTAGTTGGTCCACTTTGAATAGTTTTATCTCTGGCTGCAACACAACAAGCAGCACCCATTCTGATTCAAGTAACAGTATTTAGCTTTTTATGTTAACACAGCCACCAGAAACACCCATTCACCAGTGAA(C/G)ACTGATTTCTCCCTTAGACGAAAACAGGGAAAAAGAGAGCTTCGTTACTTCAGTTGTTGTAAAGGAATTTTTAGAGAGAGAAAGTAGAGAGNNNNNNNNNNNNNNNNNNNNNNNNNNNNNNNNNNNNNNNNNNNNNNNNNNNNNNNNNNN
Unigene0009172	424	G	*	C	ACCTTCTCTTGCTGCCAACCGCAACTTTTCTGTGTTTATATCATCAAATATGCCCTTGAAGAATAAGTAAGGCCTATAAAGTTCCACCAACTGCATCACAACTTCGATCTTCCTGTTTAGCTCAAGATAAGTTTCTTGAAAATACTGGCA(C/G)AGTGCTATATTCACCAGTTTCAGTCCCTGTAACGGGAGAAGGTAGCGAATGTAGACGTATCTTTGGAAACTATCCATGTCGGTTAATACGGTACATTTTCCAACCTTAACCGCGGTTCCATCTTTGTTTATCCATGGTTTTGCTGTGAAA
Unigene0009218	236	G	*	C	GTTTTAACCTGAAAATTGCAATTTCTTGGGCCCGGTTCCTGGTCCTACCTATCAAACCGGTCGGTCGGTTCGGTTTATATTACCACTGCTTCCACCAACCCCATCCATTACATAACCCAACAACCCCTTCATTTTCCGTCATACAACAGA(C/G)TGGAAAGCAGCACCTACCACCGTTCAATTTATGATGAAGAATGCAACGTTAATCTGCGTCCCTATAATGGGCGAAACCGTCGAAAAAATGGTACTTGATATACAAAAAGCTAAACTCAATGGAGCAGACCTTGTCGAAATTCGATTAGAT
Unigene0009402	1575	T	*	C	CATCATCTGTGAAGCACTTACTGTGTTCTGTGATCCAAAAGAAATGTAAAGAACAGAATTCTCATCTTTCAAATCAAGCCACTCAATGCATTCTTCAAGAGCTATGCCGGATTCTTTTCCCGCACGGTACTTCGAATTTGAACCCTTTGG(T/C)GGAAGAAGGGGACCAACACACCAGACAGGAAGTTGAAGATAGTTCTTCAATAGTTGCAACCCTAATGTCTCAATCTCCTCAACAGTGTTGCAAATCCACCCATCAGATTTCATAGAAAATGCTATCTGTGGAGGGAAGAATTTTGACCAG
Unigene0009468	2989	T	*	C	AGTTGTTACACCTAGGAAATCTCCAAGAGGTCAAGGATCACAAAGAGCAGCTGCAGTAGCTGCTCTTTCTAACGTTCTCACTGCTGAAAAGAAGAAACAATCACCTGACAGTTCTCCTATGGCAAGCAGTAGTCCTGTTGTTGAAAGTAA(T/C)ACTCCCGATGCTAAAAGTGAAACTGCCCCTTCTGAATTGGAAGGTCCTGAAGAAGTTACAGAAACCAAGGAGGCAGAGGAACTTGCTCCTGAAACTGGTAGCAATGGAAGTTCAGAAACAAAACTAGAAGACGTGGAGGATGGAAATGAT
Unigene0009734	1464	T	*	C	GTTTCAATAATACCTGCCCTGATTACAGTGCTGCTATGAACCCTGGTGGATGGGATTGCATGAAGTGCCTTAAGGCTTCTCCAGATTGTGGCTTTTGTGCTTATGGAGATAATAAGCTACTACCTGGAGCATGTTTGATATCCAATGACA(T/C)GACAAAGGATGAGTGTCACAAAGAGCATAGACTATGGTACACAAGAGGGTGTCCTAGTAAATTTGGATGGCTTGCAATAATAGGACTTGCACTCTATATTATATTCTTTTCACCAGGAATGGGAACTGTGCCATGGGTTGTTAACTCTGA
Unigene0009753	882	A	*	C	TAAAGATCAAATGGAATACACTGAGATATTAAAGATGCGTGGACTTCCATTCAATGTGACGAAATCTCAAATTATTGAGTTCTTTAAAGATTACAAACTGATAGAAGATAGGGTGCACATTGCATGTCGCCCAGATGGTAAAGCTACTGG(A/C)GAAGCATATGTAGAGTTTGTTTCGCCAGACGAGGCTAAGAAAGCAATGTTCAAGGATAAAATGACCATTGGATCTAGGTATGTGGAACTGTTTCCTTCTACACCAGATGAAGCTAGACGGGCTGAGTCAAGATCAAGGCAGTAATCAAAA
Unigene0009861	507	T	*	C	CAATAGTTGGTGGCTTGCAACGACTGGACAATTCCGTCCAAGGAAGCTGATAGTTGATATAAAAAATGAGATTTCTAATGCTGTTCAATTCAATCTCTCCACGGTTAAGAGTGTTGCAAAGCATTTCATTGACAAGTCTCTTTATTCATA(T/C)GGGTTAAACTCTCAGTTTGCCATTTCTCCTTCAACGTCGGTGCTATTTGCTTTAGAAGGCCATGGTGAGAAAGAACGTCGCCGCAAAAAAGTCACTGTTTTTCACGAGTTTTCTGATCACGATCTTACAGTGGAGGCAGCATGGCCTCAA
Unigene0009936	1794	G	*	C	ACCAGTAATGGTGAAGTTGTAGACATAGCTATGTCCTGATTGAATTGGACATTGTGTCACATATGCTGGTCCATCAGCCCAACCTGTTGTCAACTGCCTAATACCATGCCAATGGATGGTAATATTGTGGTTGACTTGATTAACAACTCT(C/G)ACTAGAACTGTGTCATCTTCTCTTGCATAAAGAGTGGGTCCTGGAAATTTCCCATTAACAGTTATGATTGATTTGCTTGAACATAATCTAGTTGTATTTTTGGCCACCACATGAAATTTGTAGTGTCTAACTTTGCACTCGACCAAAGCT
Unigene0009980	1440	T	*	C	GTCCAGATCTTTGATTCCATAGCAGCTTACAAGAGAAAGAGCCTTCAATTTTGCACCACAGTTAAAAAGGACACCGAAAAACCCAAACTGGGTAATTCTGTGGCACTCTTCCAATTTTAGGCTTTCAAGTGATATAGCAGCCTTGGTGAA(T/C)GAAATCAACCCATTGTCTGAGAGAAACGCACACTTTTGAAGGTGTACACTTTTCAGATTAGGGCAGCCCTTTCCCACAGCTTCAAGCCCAACATCGGTTACTCCTCTGCAGGATGCAATTATGAGTGACTTCAGTTTATGCAATCCATTA
Unigene0010006	1410	T	*	C	AGGGCTCTGAATTGTTTTAATGGAAGGTTTATTGATCTGTTGAAGACGATTACTTATGATGTTCAATTTATGCAACTCTTCGTTTGGTTTAAAAGTGTTATTAACAACAGGGTTGTTGTCAATTTTTGAGGAAGAAAATACAGGACAAAG(T/C)AAAGAAAAAACAACAAGAAAATGTACAAGGTTGTAAATGATTGGAGAAGTCAAACAAAAGCTAAAATCCATGTTTGAGAATTTTCTGTTCTTTGTTTCTATTGAAGAATCCGTTTGAGTTTGTTCGCATTGATCTTGTCTTCTTCTTCTT
Unigene0010038	192	G	*	C	CTTTTCTCTCTTCCACGGACTCAACTCAATCAACTCTACTAAAGTAAAGTAAAGAAACAAGAACCTTCTCTTTCTTCTTCTTCTCTTTTTTTCTACCTATAACTTAACAAACTTTCACTACCAAGTTTACACACATTTGCAACAATGGTA(C/G)TTATCAAACTCAGATCCTCCATTCTCTTTCTTCTTCTCACTCTATCAACTCTCTTCCTTCTTCACCCAACAACCTATGCATTCAACCAAAACCAACCTATCAAAACCATTGTTGTTTTGGTCATGGAGAATCGTTCCTTTGATCACATGT
Unigene0010069	213	A	*	C	TTGAAACCAAAATGATATACTGGGCGAGAGCTAGAATAGATACGCCTATAATTAACAACATTTTATTGATTGAAATTAACTGCAAAAGGCAATTTAAGATGTTCATTGAAAAATACTACTGACAGAACTATCATCATGAATTCTCCAAAT(A/C)GTTTCACCCAACAGGTTTGCTACGGTAAGAATAGTTAACTGAGGGAAATAGTTCTGCTCTGAAACTGGAATGGTGTTGGTAATTATCACCTCTTGAAATAAGCCACTGGATAGCCTCTCAATTGCAGGAGGGCTGAAAACTCCGTGAGTG
Unigene0010183	1101	T	*	C	TAAGTTCCGCTCAAGTTCCTGAAGAAATGGATCAATCCTGGAAGATGATGGATCCCCAACATACAGACCATCCCACAAAACATGGCTTAGATCATGGAAGACAATTCTATATGCTGCAGCCTCACAGAGTTGCTGAATTCCTTCAAGACA(T/C)GCGGCTGAAGATAGTTCAAATTTACTTGCTAATCCATTTGAAAAATCTTCTTCTCGAGCAGATTCTGAATTCCGTAGAAGAGTAATTATTCGTTTTTCCAGAACATCAAATTCACCCAGGATCCACTGCAAAGTATTCATGCGAACACAC
Unigene0010605	966	G	*	C	CATTATCAGCCTTTACTTGCGAATTTCTCCTTTGGTTTTTGAGGTATGTCCTTAGGAGGGGCACAGGGGGAAAGCTTTCTTGGAGCTGGAAGAGTTGAATAAAATGTACAGCCGCAATCTGTTTCTCGTTGTTGATTAATATTTCGACAA(C/G)AGCTGGTACTTTGTGAGTTAACCCAATAGAGCGGCAGAGCTCAGGTGCCGATCTATTCTGAGCAACTGCAAGTACAAGCTTGCAGAGTTCTTCCTCACCAAACTCTGAAGCAATCCTAAAAATTGAAAGAAGCTGCAAGAATGCCTCTGC
Unigene0010816	280	T	*	C	TGGTATGATTGCTATCCATCTTGACCTCACAAGAGGTGGCAACTTTAGGTACCAAAAAACTGCTGCTTACGGGCATTTCGGACGCGATGACCCTGATTTTACATGGGAGACTGTGAAGATACTCAAGCCAAAGGCTTGATTGAGTTATGG(T/C)ATTTTCAGAAGTGATTATTTTATCATGGTAATCATCTTTCTGATTTTGGTTTAAAATAAAATAAAATAAGAGGAGCTTCATTGTGTATATATATATACATTATAGGTGTGGACTGGAGGCGTCTGCACAATAGGAGCATCCAGCATTAGT
Unigene0010970	402	T	*	C	TTCTTTCTCCGGTCGAAAAGAATCATTTGGTTACTCTTCTGAGTAGTTTATACATGCCGAAAACATTCTTTTCTTGCCAGAGGTAGGGGATGAAAAAAGACCTATACAAAGCTGGCGAAAGCTCTCTATCCAGATAAGGTAATGCAGCAA(T/C)AGTCTCCCATGTTGACATGTCGCTACCGCGTGTCAGGTAAGGTCGCTTTAGCTGCAGCTCAACAAGGAAAGTGCATTCGTCGATATCATGGAGAAATTGCTCTTCTGATGCCATGTTCTTGTTGTTAAAGTATGGTGGTGCTGCAGCAGT
Unigene0011185	1031	T	*	C	TATTGATCTTGCTAGAAATAAGTTCATTGGAGAGATACCGAGGCTACTCTATTGGAATGAAGTATTGCAATACCTTGGGTTGCGAGGGAACATGTTGACTGGAATTTTGTCTCCCGACATTTGTCAATTAACTGGTTTATGGTATTTTGA(T/C)GTCAGAGGCAATAATTTGACTGGTACTATACCAGAGAGCATTGGCAACTGTACAAGTTTTGAAATCTTTGACATATCGTATAATCAGATTACGGGGGAGATTCCGTATAACATTGGATTTCTTCAAGTAGCTACTTTGTCGCTTCAAGGA
Unigene0011211	1520	A	*	C	AATTAACTTCAATTGCATAAGAGATCAATTCAGGAAACTCCAGCAACAACAACCATATCAATTATCTGGGAAAAGAATAGAATAGAGTTGAATTGAGGGAGAAAAAGGGAGAGGAAAATAAAAGAAGGAATTGAATGGAAGAAGGTGCAG(A/C)GTGGATCGGGGAATCAAAGGGTGTGGTGTGGGTGAGAATTGATGCGATAAATTCCGCGAGGAACCGGCGAATAACTAGATGTGCCAAAAGNNNNNNNNNNNNNNNNNNNNNNNNNNNNNNNNNNNNNNNNNNNNNNNNNNNNNNNNNNNN
Unigene0011266	2726	T	*	C	GGTTGAGGCAATGCATAAATGGAATATATATCATAGTCGGAGAGAGCGAGAAGACAATGTTGACATATATGGCGAAAATGGAATTTCCGACAGCAGCAAAATATATCCAGAGGAAGTAGAGGAGAACATCATTAACCCTAAAATTAAAAA(T/C)GGTGTCATAAAAGGGAATCCCTATGTCAAAGAAGAGCATCATTTGTATATTTCAGAAGCAGAACTTCAAATGCATCCAGTTCAGATTCCGTTATGGGCGAAGCAAGAGATATATTTTAATTCAATGCTGAAAGAGTCCACCATAATGGAT
Unigene0011390	98	A	*	C	NNNNNNNNNNNNNNNNNNNNNNNNNNNNNNNNNNNNNNNNNNNNNNNNNNNNNGACAGCTAGACCTTCACAACACATGTGGTTCCTATTTTCTTGTCCTTCAAATCCTGTTTTCATATCTTCACTGCATACTCACATTAAATCCCATGGA(A/C)AAAGATTCAACAACCCTCTTCATCAACACCCTTCTTTTCTTCTTATGCTTCTCATTCTCACATTCTTCAACATCATTTCCTAAACAAGCACTTCCCACAAAATCAGGTTACCTTCCAGTCACCTCAACCTCCAATTCCTCCATTTTCTAC
Unigene0011390	326	A	*	C	TCCTAAACAAGCACTTCCCACAAAATCAGGTTACCTTCCAGTCACCTCAACCTCCAATTCCTCCATTTTCTACACATTCTATGAAGCCCAAAACTCATCCTTATCTCTCTCCCAAACCCCACTTCTCATCTGGCTTCAAGGTGGTCCTGG(A/C)TGCTCCTCCATGATTGCCAACTTCTACGAACTCGGACCCTACCGTGTCACCAAATCACTCACCCTTCAACCCAACCCTGGTTCTTGGAACAGAATCTTTGGTCTTCTTTTTCTTGATAATCCAATTGGAACTGGCTTCAGTGTAGCCTCA
Unigene0011488	1575	G	*	C	ATGCATCTTTTGTTTTTAATAGCTATTACCAGCAAAATGGAGCCTCTGATGTTGCTTGTAGTTTTGGTGGTACAGGTGTAAAAGTTGACAAGGATCCAAGTTATGATAACTGCATCTACATGAGAGATGGAAATAATAAAACATCGGGAA(C/G)TAATGCAAGGGCGATGTCGTCAACTTCATCCTCCCAACAGAAAGGAAGATATTCTTCAATTTCTATGTATCTTCTTGTAATTTGTCTCTTCGTTCTATTGAATATCGAACAATCCTGAGAAGGCAAGCTTGATTGTAGAAAATGCAGCAT
Unigene0011488	1579	T	*	C	ATCTTTTGTTTTTAATAGCTATTACCAGCAAAATGGAGCCTCTGATGTTGCTTGTAGTTTTGGTGGTACAGGTGTAAAAGTTGACAAGGATCCAAGTTATGATAACTGCATCTACATGAGAGATGGAAATAATAAAACATCGGGAAGTAA(T/C)GCAAGGGCGATGTCGTCAACTTCATCCTCCCAACAGAAAGGAAGATATTCTTCAATTTCTATGTATCTTCTTGTAATTTGTCTCTTCGTTCTATTGAATATCGAACAATCCTGAGAAGGCAAGCTTGATTGTAGAAAATGCAGCATGATT
Unigene0011555	745	A	*	C	TTCACAGGGAGGATTGAAGGCTGAAGGTATATTTCGCATAAACCCAGAAAATAGTAAAGAGGAGCATGTGAGGAACCAGTTGAATAGCGGTATTGTGCCAGATGACATTGATGTCCACTGCTTGGCGGGACTGATCAAAGCGTGGTTCCG(A/C)GAGCTTCCTTCCGGAGTGCTAGATGGTCTTTCCCCTGAACAAGTTCTTCAATGCAACACAGAAGAAGAATCTTTTGAGCTTGTGAAGCAGCTTAAACCAACCGAGTCAGCCTTACTCAGCTGGGCTATTGATCTCATGGCTGATGTTGTC
Unigene0011555	1117	T	*	C	GTCTGATCCTCTAACTGCACTAATGCATGCGGTTCAAGTGATGAACTTGCTAAAGACGTTGATAATGAAGACCCTTAGGGAGCGTGAAGAAACAGCCACAGGTGGATATTCACCCATGTCATTTCGCACATCATTTCGTCGGTCAGAGGA(T/C)GAATACGACAGTCAGCGAGAAACAGCAACATGTGGATATTCACCCATGTCCTTTCGCTCATCGTATCGTCCATCTGAGGATGAATATGACAGTCAACTAGAAATAGAAGCAAGCGGTGAATTGAAAGGGACCAAATCAGATTTCAATGAT
Unigene0011555	1288	T	*	C	AACAGCAACATGTGGATATTCACCCATGTCCTTTCGCTCATCGTATCGTCCATCTGAGGATGAATATGACAGTCAACTAGAAATAGAAGCAAGCGGTGAATTGAAAGGGACCAAATCAGATTTCAATGATCACACTCATTACAGAAATAG(T/C)AGCGAAGAGGAATTGGAGGCTGAATCTCTGAGCGAGATAGAAGAATGTTTCTTAAAACAGTTGGACGAGAACGTGAATACCAAAGAATTCTCAGAAGAATCTGTAGATTATTTTCAAGAGTGTGTGAGCTCCAAAAGCTGCTGCGACTAT
Unigene0011845	2681	T	*	C	CAACTTTTTTCGATGAAACTGTTGCCACCAAAATGCGCCTTGACCATCTATCGTGCCATTTTCGCCTGTGACAATAACATCTGTGAGGTTAGTTCCGAATATGAGGCTTGTGAATCTTCCTGCTGGTGCATCTCTTCCTCTACCGTATGA(T/C)GGTAATGGTTCAATCACAGGCCACTCAGTTATATCCTGAGAAGCAAGAAGAACAGCATCTTTATCCAAATAGAGAGTAAAGTGACTAGTAAGACTAAAACTACCAGTGAGCCATTTTCCGGCAGGAACATAGAGCTGAGAACCACCTTCG
Unigene0012236	521	T	*	C	TGTTAGAAATATGGAATTCGACCGACAACTTGGCCCTTACAATCTTAGCCATTGTGAAGATTGGAAACGATTATCTAATTTCATTAGAAAGAGCATCATCGAACGGCTTGAACCCATCGGAGGAGAAATAAGTGTTGAATGTGAAAATGA(T/C)GTGTTCAGAAACACTCCTAAAACTCCAATGGAGGAAGCACTAGACAAGAAGCTGAATGTTGGTAATTCCGAAGCATCTGTTGGCAAGTTCCAGAGAAAAGGATGTTATTATACTTCGATTCCACGTGTTGTAAAATGCAAGGGGATTAGT
Unigene0012296	756	A	*	C	TTATGTTGCTGCCGTGGATAATTGGGTTGGTTATGGTGTTTTATGTTGCTGGTATTGTTTCATCTCTTTCTGTTTTGGGACGTACCATTTTTTGGTTTGCTTCGCCGCGTAAGGATTATCCTGAGTGGAAACTGTTATGAAGAGATAAAT(A/C)TGGTGTTGAGGAGCACGCACGATTCAGATTTTGTGCATGCTCATGCACCCAATAGAACAGTGAAGAATACAGAACTGCTCATGTGCCTTATAGAACAATGAAGATTAAGGAACTGCTCATGCACCCTATAGAACAGTGAAGATTACAGAA
Unigene0012436	1418	T	*	C	TGATTATATGCGGAACTCCAATGTCTCTAATATTGACTTCACCTCTGTTCATATCTACCCGGATCAATGGTTTCACGAGGATGAGAAAGCAATTGAAACACAACTGAAATTCGTCTACAAGTGGATGCTATCTCACATTGAAGACGGCGA(T/C)GGAGTACTGAAGAAACCGGTCTTGTTCTCCGAATACGGATTATCAAAAACAAACCAGAACTTCACCATATCCGCCCGAGAAAAGATGTATGAATCAATCTTAAACATCGTTTACAAATCTGCAAAGAGAAACAGGTCTGGAGCAGGTGCT
Unigene0012436	1508	T	*	C	AATTGAAACACAACTGAAATTCGTCTACAAGTGGATGCTATCTCACATTGAAGACGGCGATGGAGTACTGAAGAAACCGGTCTTGTTCTCCGAATACGGATTATCAAAAACAAACCAGAACTTCACCATATCCGCCCGAGAAAAGATGTA(T/C)GAATCAATCTTAAACATCGTTTACAAATCTGCAAAGAGAAACAGGTCTGGAGCAGGTGCTCTAGTTTGGCAGTTCTTAGTTAGCGGAATGGAAGACTACACAGATGATTATGGGATAGTTCCGGGGGAAAGTCCGTCGACACAATCACTA
Unigene0012702	66	T	*	C	NNNNNNNNNNNNNNNNNNNNNNNNNNNNNNNNNNNNNNNNNNNNNNNNNNNNNNNNNNNNNNNNNNNNNNNNNNNNNNNNNNNNNAAAAAAACAAATGATCGGAATCAAGTTCCCGGAAAACACTGTGACAACTTCACCGCCGGCAGCCA(T/C)AATCTCTTTCAGTTTTTTTCAATGGGAAAGAAAAAGACAGAGGATGCAGGTCCATCTACAAAGGCTAAATCGAAGGAAAAATTTTCTGTCTCTGCCAAGTTGGCCAGTATGCCTGAAAAGGTGTCTTGTTCGAATAAGCCAAAGCCAAAA
Unigene0012716	1022	T	*	C	CCACATGTGGAGCTGCAGTCTTGTCGTCTAATTTTTCCCCTTCTATTATTGTTGCAAGATTGCCTTCAAGGATGCTGAGGGAAGGCCCAACAATTGTTATGTGACCCATCTTTCGTTGTCTTCTCATATCTGGCTTGTCATACCAATGAA(T/C)AGAAGCATCAGGGATGGTCAATGCCCTCTTCATCAATTGATGAGCCACTTGAAAACCAAGCTCCCCCTCTTCTTCACCTAATATATTGTACATGATCGCAGCTGGAGTTTTCATTGATGGATTGCCGAGAGGAAGACCAACGACAGCCCG
Unigene0012794	2285	T	*	C	AAAACCATGGTACTTCCCAACAGAATTCAACACCTCGAATATCTGACCAGCTAATTCTCTTGTAGGTGATATTATTATGCTCCCAACCCCATCTTCCGGTCCCCATCTCTCTCTATACAATTTCTCCAACACTGGGATAATGAAAGCAAG(T/C)GTTTTCCCGGAGCCAGTTTTAGCGGCACCGAGAACATCACGGCCACAGAGTGCATGAGGAAGAGAAGCTCTTTGAATATCAGTCATGGAAACGAACTTGGAGCTTCGCAATGCGTCTTTGGTTTTCTTCGACAGTGGCAACTGCTCAAAC
Unigene0012998	733	A	*	C	TGGTGTGAATGTGAAGCCATTCACGGTGGAAAGTGTTCATAAGGGTGAAGAGAATGATGTTAGAGAAGAAGAGTCTCTTGTGGAAAAACAAGCTTGGAAGTTGTTGAAGGATGCTATTGTGACTTATTGTGGGAATCCTGTGGGGACAGT(A/C)GCTGCAAATGATCCAGGTGACAAATCGCCATTGAATTATGATCAGGTTTTTATTAGGGATTTTATTCCTTCAGCTCTTGCTTTCTTGCTTAAAGGAGATAATGAGATTGTCAAGAACTTTCTTCTTCATACCTTGCAGTTGCAGAGTTGG
Unigene0013613	2251	T	*	C	TGTAAGAGCTTGTTTAGAATCCGACATTGTTGTTGGAAGTGCACTAGTTGACATGTACGCAAAATGCGGAAAGATAGATTACGCTTCAAGATTCTTCGAGTTGATGCCTATAAGGAACATATATTCGTGGAATTCAATGATTTCAGGCTA(T/C)GCACGCCATGGACATGGACAAAAAGCTCTAAAGCTTTTTACACGAATGAAACAGCATGACCAATCACCAGATCATGTCACCTTTGTCGGGGTTCTATCGGCTTGTAGTCATGTAGGGTTAGTCGATGAAGGATTTAAGCATTTCAAATCA
Unigene0014083	485	T	*	C	AGTGTAATGGGAAATCCTCGTTTCCACACAATCGATTCAAGATATCTTCTGGTTGAGAGGAGTCCCTTCCGGGTAGAACTAATAGTTGATTTTGTCTAATCTTCAGCTAGGAAGATATAACGCCATCCAAATATCACAGAAACTAATGTA(T/C)AAATCGTTGTGCTCAGATGAGCAATTCATTACTATTACATGTTTCAGACTTTGTAAAACATGGCTACTATTTAACTAAATTAAATTCCAAGGTAGTCTTTGATCTAGNNNNNNNNNNNNNNNNNNNNNNNNNNNNNNNNNNNNNNNNNNN
Unigene0014965	744	A	*	C	TAAATTCGGTTCTTCGCGACAACTTGGTGAAGAAATAGTGTTTCTTTGTAGAAGCTGTTTGAAGCAGGGGGAATGTTCATACTCAATCCAATTTTTTGTAGGTGATAGAATAATAATGGCTGCACAAATTGTGACCCTTGTAGCAAATTT(A/C)TTGAACTTTATACAATTGCATTAACACTAGTTTACCATTGCATGTTTCTGAGTTGTGTATCATTGNNNNNNNNNNNNNNNNNNNNNNNNNNNNNNNNNNNNNNNNNNNNNNNNNNNNNNNNNNNNNNNNNNNNNNNNNNNNNNNNNNNNN
Unigene0015003	892	T	*	C	TTTCGATAATACTTGTCGTGTCAAATCAACAAGGTCATACCTATATGTGAGACTTCCTGTGAGATTCTTTCCACCGGCTAGGAATAGTTGTAATGCTTTGATCACGTCTTCGGGAGGATACCACAAATGAGCCTGTGGCATACCAGCTGG(T/C)GTTTGCTGGAATAAGTATCGTCTATTTCCAGGGGGCATGAAGTAAATTTTCTTTTGATGGTTTAACATACCAGATTTATTGTTTGTGGATGGATCCCAGTCAGGAAGCATTGCAATATAATCATGGTTATGATCAGCAATTCCGTCAGTA
Unigene0015165	341	T	*	C	CCGGTACTACATACTTAAAGAAAAAGGGTTCAAACAAACGGAAAAGGTTTTTCAAGAAGAATTTCACTAGACCAAAAGCAATTCCTCATTGAGTACCCTTCTCGAACCTGACATTGCCAATCACCTCCTTGCATTTTCTCAGTTGGAGAA(T/C)GGTCCTGCTAGAGGGCATATTCAAGAAGCTAAGAATTTTTCCAATACTTTCCACGAAGACCAGGAATTGATGCACTTACAAGACATTAAAAGGTTGGAAGGAGTTCTTTCTCTTACTCATTTGAAGGAAATGGAATTCGCTCATTCACTA
Unigene0015354	1469	T	*	C	TTCCTTCATCAATAAAAAGTGGAACAGGATATGGAGCCGCTCCCCCGTCAAGAAATTGTTTATAAGTCTCAAAAGCAGCTGGTAATGAAGTGTCCGGAGATAATTGGTACCACATTAATAATCCTAAGAACCTCCTCCAGTCAATTTGGA(T/C)ATCGTACAATGCATCATGAATATTTCCCGCGAGTAATTCGTAAAGTCTCAATCTGTCTTTTTCAATGAAATTAAAATCAAGCCCTTTATTCCTCCAGATATCAAGTTGCTTTGCAACGTCAGAGCGATTCAGAGTAGAACCACCAGCCTG
Unigene0015629	463	T	*	C	CGATGAAGATCGCTTAGAATGGAGCAATTTATCTGCCTTGCTCAAATCGGAATATCCAAAGTACACTTCGTTGCTTGCAAAGATTTTGGAAGGCTTGGTTTCAAGGAAAAATATCAAAGACAAATTCGATCATAATAAAGAGATAGTTAA(T/C)GCTGCAAATGAGGTGATTGGCAGTATTGATAGAGAAGAGTTGGCAAAATCTTTTGCCCTGAAAAATGATCCGGACGATGAGGAAGCAGAGAAAACCAAGAAAAACCTGGAATCAACTCGGGACCACTTAGCAGAGGCACTTTACCAAAAA
Unigene0015919	2726	T	*	C	TTCTGTTTTTGATTTGGACTCGCCTGAACCCTTGGCTAATTCACTTTTACAACCTCAATTTCCTGGAACCCTTGTGTTAGAACTTGATTGGTTGCCCTTGCGAACTGATAAGAATGATCCACTGGTACTCTGCATTGCTGGAGCAGATGG(T/C)AGTTTCCGCCTTGTTGATATTAATGTAAATGACAAACGATTTGGTTCTGCACCCCAGATCAGAAAAACAAAGGAGAGATTCCGGGCAATGCCTATATGTTGTCCCATACTACTCCCTTCACCACATGCATTGGCACTGCAAATGATTCTG
Unigene0015919	3084	A	*	C	CCTCACTTAATTCCAGGAGCTCCTTCACCAACAGGGGATCTTCGCACATACATGATCAGCATTCCACTTCTTGGAGACTCTGTGGTGCCAGAGATGCTTCTAAAAGTATTGGAACCATATCGAAAAGAAGGTTGCATGCTTGACGATGAG(A/C)GAGCCAAGTTGTATGCTAGTATTGTGGATAAAGGTTGTGCTGCAAGGTTTGCTTTTGCAGCTACAGTATTTGGTGAATCGTCAGAAGCTCTGTTTTGGCTACAGCTACCACAAGCGCTTAAACATTTGATTAATAAGTTATCGACAAAGC
Unigene0015919	4414	T	*	C	AGATGCTTTCATTGTTGTCATCTTTGGAGGTAGCAAGAAGCAGAGTGTTCAATCAAACACCAGTCCTCTTGATTGCAGTGGATATGGTTACATGAACTTTCTGAAGTTTACATTGCAATCTCATAAGTAATTGTCCCAGTGTAGATCGTA(T/C)GTAAAATTTTGTAGGCAACAAATCATTGAATTTGTATTTGTTTATGATGGGACTCCGCAATAGTTATGGTTGCATCAATCTACGCTTTCATGTGTTAAATTGGTGTTGTATAAACTGACGAACTTATATAGTTTATTTTTATATTTGAGA
Unigene0016007	1190	T	*	C	CGAGAAAGAGTCAATTAAGCACCGGTCTCCGGTAATCCCAGATGATTTTCGATGTCCTATATCGCTTGAACTAATGAAGGATCCTGTAATTGTATCTACCGGTCAGACATATGAAAGATCATGCATTCAAAAATGGCTTGATGCTGGTCA(T/C)AGAACTTGCCCTAAAACACAGCAAACGCTTTTGCATACAGCCCTTACTCCTAACTATGTATTGAAGAGTCTGATTGGTTTATGGTGCGAAAGCAATGGTGTTGAGCTACCAAAGAAGCAAGGTAGCTGTAAAACAACGAAATCCGGAACC
Unigene0016072	361	T	*	C	AATAACTCTAGAGAAAATTGCACATGCTTCCTAAATGCTCCTTGGAGAAAGAAGACAACAAAACTGTACAGTGAACTATACAGGTGAATTACAAGTATAGACTTGGATGTATGTTCCATTTTATATAAAAACATCAAACCTTTTTTGCTA(T/C)AAAGGCTAGTCCAGTTTTCCACTGAAGTCAGACGTGGATGATGGGGGAGGCCTAGAAGTAGTAGTAGATTGTGGTGGAGGAGCTGTAAGGGCATACGTGAGTCTCGACGATGATGAATTTTCTATGAGTCCGGCAATGCCAGCTGCTGCA
Unigene0016072	487	G	*	C	AAAAACATCAAACCTTTTTTGCTATAAAGGCTAGTCCAGTTTTCCACTGAAGTCAGACGTGGATGATGGGGGAGGCCTAGAAGTAGTAGTAGATTGTGGTGGAGGAGCTGTAAGGGCATACGTGAGTCTCGACGATGATGAATTTTCTAT(C/G)AGTCCGGCAATGCCAGCTGCTGCAGATTGAGCATTTGAAGGAAGAAAGAGATCGTGCTTTTGGTCTTTGTATGCACTCCAAACGTCTGAGTTATTCAATATTTCCCGCACTCTAGTACAATGGGCTCCTTCAGTAGCAAACGCATGCAGA
Unigene0016072	1120	A	*	C	ACTCAGACGCACACGTTCCTGAGGAGTTTGGGTGTTCTCAGTTGTTTCATTATCTGGGCCATTTGTTTTGTCTGCATGCTTCCCGTCATTTATCTCATCTGTTGACATTGTTTCTCGTCTTCCTTCAAATGCAACTGCACCAACTAGTTT(A/C)GGTACATATCCAAGATACCCAACATGATCAGCAAGTGCAGGGTGCACACGCAGTAATGAGACCAGGGCAGCCGAAAGAAGCAAAGGAAGCTCTGGGTCAACAGTCTGTGCCTCATAATGAGTGGCGGCAATAGATGACAAGTACTGATCT
Unigene0016072	1177	T	*	C	GCCATTTGTTTTGTCTGCATGCTTCCCGTCATTTATCTCATCTGTTGACATTGTTTCTCGTCTTCCTTCAAATGCAACTGCACCAACTAGTTTAGGTACATATCCAAGATACCCAACATGATCAGCAAGTGCAGGGTGCACACGCAGTAA(T/C)GAGACCAGGGCAGCCGAAAGAAGCAAAGGAAGCTCTGGGTCAACAGTCTGTGCCTCATAATGAGTGGCGGCAATAGATGACAAGTACTGATCTAGTAAACCTTCCAAAAACCTTTTAGGGTTTCTCAGAGGGAATTTAGGATCTTTCAGA
Unigene0016318	868	T	*	C	ACCAGACTCTCGAAAAGATCTCGGCTTGCTAGCAATTTGTTCTGAAGCTTACCGGTACTAGTAGGCCACATGTGGTCGTAGTCACTCAAGGCAACACAAAAAATGACTACCCTCACATCTTCAAACATTTCCAACCATTTGCAGCCATCA(T/C)GTAGTCCCTTCGAATTTATGCGAATCAGTTGAAACTTGGTTTGAGGAGCTGGGTTATTTAAGTTCTCGCTGTATATCTCAGACATAGGACTCCTATCATCAAATGAGAATTCCATGAAAGCAAGACCATTGCTTTGTGTAACTCCTTCAG
Unigene0016318	1768	T	*	C	CCAAGAGGATTAGTAGATGGTACAGGCAAAGAGAATAATGAACAGATGAAACGAGTGGACGCCTGCCTTTCCCCATATGTTCCCCTTAATATTATTTTGGCCTTCTTCCTCATAAGATCCATCATCATAAACCCAGAAATGGGTATCTCG(T/C)GGACATTGAACGTTTGCAAGCTTCAACATTCTAAGCTCAATCTTTGTTATTTCACGGCCATTCATGTAGACTCTAGTATTCCCATTGCTTGCTTCCGGTTGAAGCTTGCCTCCAATATTAAGCTTCGAACTTATTATCTTATCAGGCTTC
Unigene0016324	598	T	*	C	ACAAAAGTTTGAGAGATTGAAGACATTAGAAAAAGAACATAAAGATGCTTTGGAAAGAGCTGTTAGCTTAAATGTACCTCATGCAGTGGACACTGCAGAGAAAGAACCATCTGAAAACAATGAAGGTGAGGCAGCATCCACTAGTAATGG(T/C)GACAGAGAAGCCGAAGCCGAAGCTGCTGCCTCAAGTACTGAATCAAAACCAAGTGGTGGAAGATTAAACTGGGAAGAGGTTGTTGAAAGGCTATTGAAGAAAAGTGAAACAGGAAACAAACATATTGAAGAGGATACAAATGTCCCACAT
Unigene0016491	623	T	*	C	AGCTCACCGTCGGTCTGTGAGTGACTCCGTGGCGTTCTTGGAATTGCCAATGCTCGACGATTGCCGCAGGAAAGATGGTGAAAACAATATTAACGATGATGACAACGAGTTCGACAAGTTTGACGATGAACAGTTTATGTCCATGTTCAA(T/C)GATGAAATAGCCGGTGTCCATAATATGCAACCGATATTGTCCTCGTCGAACACTTCGAGTCCTTCTGATCAGAATTTTGTCAACAATGAGAATGAGAATGAGAATGAGATGATAAATAAGGAGGAGAAGAAGGAAAATGATTTGAGAGAG
Unigene0016491	794	T	*	C	TAATATGCAACCGATATTGTCCTCGTCGAACACTTCGAGTCCTTCTGATCAGAATTTTGTCAACAATGAGAATGAGAATGAGAATGAGATGATAAATAAGGAGGAGAAGAAGGAAAATGATTTGAGAGAGATGAAGAAAGAGGAAGATGA(T/C)GAGAAGCAATTGAAAAATGAACCCGAGGAGGTTGAAAGCCAATGCAACCAGGAAAATTCACAGCCTCAAAATAACAACAACAATGCATCTTCTTCTAACGACAGAATCACCGACCCTAAGAGAGTCAAAAGAATCTTGGCGAATAGGCAA
Unigene0016756	587	G	*	C	AGATTCTCTAAGAGAAGTCTTTGACATTTCTCTTGAGCTTCATCTCTTTCTTGAATGATGTTGCTGATTAGATCCTTGAGGTTGGTTAGTTGTTCATCTTTTTTTGTGAGTTCTTCTTGAGCTAGAGTTCTTGTTTGTTCAAGCTCTAGA(C/G)TTGTGTATAGAAGTGATTGTCTCAGTTCCTCCATTGACTTTCCTTGGCAGAAGTAAGCCCAATTTAGAAGAGAGTTAGGTTGATGGTCCATGTTATGAAGATGAAAATTTGTGTAAATAAGTGCTTTTTTGAAAGAGGAAGTGAAAATGG
Unigene0017171	1157	T	*	C	ATACTTTCGTCATGCATCGGGAGAGATGTATGTTATATCACAAGCTTTGGCTAAATTCATATCAATAAACAGATCCATTCTTCGTACCTATGCCCATGATGACGTGAGTGCTGGATCCTGGTTTATTGGACTTGATGTGAAGCATATTGA(T/C)GAGACAAACTTTTGTTGCTCTTCTTGGTCAACAGGAGCAATTTGTGCAGGTGTTTGAGTTTATTCCAGTGCATAATTGTGAGATGACTACCAGTTGTAATACTCAAGAGCCATCAATTGTTAGACGCTTTTCCACAGATCTTTGAACTCT
Unigene0017260	1409	T	*	C	CCTCAGCAGTTTTATTTAGATCAAGAGTACCATCCTTAGCATTTTGGATCAAGCTGACAAATTTCTTGGTTAACAATCCTAAGGAACTGTCATAACGACAGTTGTTTACTGCCGCTGCATTCAGTGATTCTCCATTTGTCATCTGAGCCG(T/C)AGATTTTGCATTTCTTGAAACTTTAGATTTACCATTATGCTTTCCTCTTTGATTGGTTTCGATTTGAAGAAGAGGAGGAAGATTAACCGTGTTGCTCTGACCAGGAAACACTTCAACATTACTAACATGCAAGTTTACATTATTGATTCC
Unigene0017309	297	G	*	C	TTATCACCCAAAAAAAACATAGGCTTTTCCTTTTTGTAGCATGAAGAACACACGAGAAAACTTTATACTCCTAAAAAGCACTACTGCTTACTACAAACTCTATAACATTGCTAAATGTAACAAACTCTGATAACAAGATTAGATTTTGCA(C/G)AATTCCATCCTCTCAAATACCACGTCTATCGAAAACCCAGGCGATCGCTACAAAAACTCGATCCCACAACTGACAGTTGAATCCTCCCTGTCCATTCCTCTCCAGGCTTCAAGTTCACAGGTTTTTCTATAACTGCTGCATCAACACAAA
Unigene0017367	1234	T	*	C	AGCTCTAGCACTCTCCAAACAGTAACAAAACAAGAAAATAACTAGATCCCAGCCAATTCTTCAAACGATCAACTAGTAGCTCGACGAAACAACAGCAGCAACAACAACTAGGATAATAATATAAAACCAAAAAAGAGTAAAGGGACGATA(T/C)AAGAAACGAAAGTTCTTATGTTAACTAAGATTACCACGCCTATCACTTTTTTCAAGAGGTTTCAAACGATGAGATAAAGATCCATAATAAAAATTGGTGATGAAAGGAACCAAATGACGAAGAAGTTCAATAGGCACCGAAGGCATTATT
Unigene0017387	398	T	*	C	CAAAAGTTTTTTAGAACACGATAAAATCATCTTTCATCTTCGTTCTTGAAGCTTGGCATCTTCTACTCTTTACAAAAGACTGAGTCAGGAAATACTTTATATTACTATTTGGCCTTTTTAGAGCCACCCTTCTTAGACCTTTGTGTTTCA(T/C)GTTTTCTCTTGGAGGTAACACTTTTAGGCACAGTAAAAGGGGTAGACTGAGTTGGCACACGATGCCCATGAACCATAGCAGGGAACCCAGCAGCAGGGATTCCAACAAGAGCACAGCAGACTCCTGCATGGTCATGGAAGCACCAAATGC
Unigene0017387	1052	T	*	C	AATCTGTCATGAGCAAGTTCTCAAGCTGCGACATAGATGAATTAGGCGAGGGATGGTCTGCGAAGGAATCAGGAGGAATAATTCCATCTTGAAAAAAATCGGCGACTTCAAGCTCTGGTAAATCATCGAGGATAGATTCCCAATCTACAA(T/C)GTCCATGGAATGAGGAAGAAGATGGTGGTGGTGGTGGTGGTGGTGCNNNNNNNNNNNNNNNNNNNNNNNNNNNNNNNNNNNNNNNNNNNNNNNNNNNNNNNNNNNNNNNNNNNNNNNNNNNNNNNNNNNNNNNNNNNNNNNNNNNNNNNN
Unigene0017404	1084	G	*	C	ATGTGATCTGGACTTTGATACTGCACAGAAGTAGGATTATCCTCTCCACAAACATGCTTGTCTTCTTCAATCCTATTATCTGGCGATTGAACTTGTGAATTAGAATTTTCAAATTCGTCATGGTTCAAAGGCCGCACTTCCTCCTTTTCA(C/G)AAACTTCTTCGATCAAAGTATCCATCATTTCGAGCTGTTTTTCACCTGGTTTTCTCTTCACAATCTTGACTCTAGACCAGACAGGATCTTGAGTTAGTTCTGAAGATTGTGGAGACAAACTAGAGTTGTTTCTAAAGCAGTTTAAAGGCC
Unigene0018420	1091	T	*	C	TGATAAGCAAAGTGAAGTGATATTGTCTAGTGGAGCAATTGGTACACCTCAAATGCTATTGCTAAGTGGAATTGGGCCTAAAGCTGAACTCGAAAACTTGAACATCTCGGTGGTTCTCGACAACCGTTTCGTTGGAAAGGGAATGATAGA(T/C)AATCCAATGAATGCACTTTATGTTCCTTCTAATAGGCCAGTTCATCAGTCACTCATTCAAACTGTAGGTATCACCAAGAAAGGCATATACATTGAGGCTAGTAGTGGATTTAGTCAGTCCAACAGCAGCATTCACTGCCATCACGGTATC
Unigene0018420	2387	G	*	C	CAAAATGGTAGCATCCAAGTATAGATATGAGAGTGTATAACTACACAGAATCACCATAGAAGTTGTTATTTTGTAATGGCTTGGCATTAATAAACTGCATGATGGTGTTTCATATCTGACTATATTACTTTAGGAGCTGAGAAAATACAT(C/G)ATACAACTTAAGTTTCTATAATTCAGCGGTAACATAAAATAGCTTATACAAGGAAACAAGTTTATTCATTTTGCTCCATAAGTTTGAGACAAGAACATGACTGATTTTTGGTGTTGAGAAAGTAAAAAAAATCCATTTTTTATAACAATA
Unigene0018524	925	T	*	C	TCCCCCATGACGTTTCCAGACTTCTTTGTCGTAGTTCTCTGTTACACTGATATGCAGGCCATTTTCTTCAGCCACCTCCAAGAACAGGTCCAATGAGTTGCCTCTTTTTGGACTTAAAAATATAGCCTCAGAAGATTTTGTTTTTGACAA(T/C)AAGTGCTTGACAATTCGAGCAAGATCTCTGTGGAAGTCCTTAAAGAAAGTGCAATCACTTGCAACAATGATATCAAAATTGTCTGCAACACTAGAAATATCTTCCTGATTCCAATGAAGCATCATTGACTTCACAACTGTATTCCCAAAT
Unigene0019002	893	G	*	C	TGTCTTAAATGCAATGTCCCCTCAATTTCTTCACTTAACTATTCCAACCCATCTCCAACAAATAATTCACATCACACTCTCTGCCATTTTCCTAAATTTATTACTCTCTGACATCCAAGGTTTTTCAAAGTGAATAATTAATTACAAAAT(C/G)ATAATTACATCATCTACCACTAAAAATACCATTTGATTTGTGATCTAGTAGCTTCATAATTTAAGCTACATTTCTTTCAAAAAATATGAATAAATTATATTATNNNNNNNNNNNNNNNNNNNNNNNNNNNNNNNNNNNNNNNNNNNNNNN
Unigene0019062	230	T	*	C	AGCAAAATATGCAGCCGTCACTGTAATTCAAGCACGCCGCTGGTTCATCCTCCCGTACTGTGTGATTTTCACTTCTTCTTCCCCGTCACTGATAATGGGGCGGAAAGCCGGTGGGCTTTTTATCAACTCCAAGAGATTCAGTTCACTTCA(T/C)AAACCTTGCATGAAGGAAATGATAATGTTTATGAACTGTATGGCTACAAGCCATAGCGATGTTGAGGCATGTGCTAAGCAGAAGGAAATATTAAATACATGTATTGAATCTCAGAGTAAAAAGAACAGAAAGTCTTGGGGGAGTATCAAT
Unigene0019062	692	G	*	C	TCTCTATTTAACCATTAGTTAAAGTTGAAAGAGTTGGTGGAATTATTTTGAAGAATACCAATGTAATTTGTTCTGTATCAGTTAAAGCTTTGATAAGCTGCAAATAATTTATGATACCATCACTTTGTTATGTAGTTTCTGCCCTTCATT(C/G)ATATCATACATTCTTTTATATTTGATGAAGATGATAGCGATGTTCCATTGTTTCTCAACAATATTGTGCTTATGAGTTATGTTTGTTGATCATGTGATGAATGCTTTTTTAAATAGAATTTCGAAGNNNNNNNNNNNNNNNNNNNNNNNN
Unigene0019132	1224	T	*	C	ATTGCTTTTTGGAGCTGTAGTTTCATGGGGCATTATGTGGCCACTGATCAGAGTTCTAAAAGGAAATTGGTTCTCTGGAAGTTTACCAGAAAGTAGCATGAAGAGTCTTAATGGTTATAAGGTTTTTATTTCCATTGCATTAATCCTTGG(T/C)GACGGACTCTACAATTTTATCAAAGTTATATATTTTAGTGCCTTAAATTTTCAAGCCTGCATGAAAAGGAGGAGTCGCAGAACAGCTTCAGTTACAGATGATGAGCAGAACAAGACTCCAGACGATCTTACCCGCGATGAATTCTTTATA
Unigene0019200	2039	T	*	C	ATGCAGAACTGCGTACTCAATTGCAGCACCAGTTCCGGCATATTTTGCCTGGTCATATGGTGGAACCAAGTTAGCAACATTTCTGACCACAAAGGCTTCACCTGGCTGGAAATCTAGCACATGAGATGGGCAGACTCTTGAGTCTGAACA(T/C)GCAAACACCATAAACGGAGGGCTTTGGCCTTTGGCAAGTTCACCATACAAAGCTGGATTCTTGTCATATTTCTCTTTCTTGAAGTGAAGGAAACCAGTTTTGATCCTTTCAGAGGCTTCAGATTTTGGAATGCCATCAGATGATGATGTT
Unigene0019402	127	G	*	C	NNNNNNNNNNNNNNNNNNNNNNNNGTATAATCTGTCATACAAATGAAGAACTTTAACAGCTCAAAATTAACTTACACCACAATTAAGTTAATTACTTCGCAACCAAGTAGAAACCGATATCTATATAGCACCAACATCTCTGAATATTGA(C/G)AAGCCTTACAACACAATGAATCAATGATACACTTATTTCTCAAACCAACCTTCAAAATCAGATGAAACACACTCTTTGGTAGAGACAACTAAAACATCTACCAACAAATTATTCTCACACCCTTAGATATTCGGGTAAATATCAAAAGGG
Unigene0019402	484	G	*	C	AAACTCTTGTATCATATTGTAATAATTGCTGTACAAAATATATAGCAGAGAATACACAAACAAAATCAGATGAACTCAAAGCGCATGAGAAGCTTTACATTGTTGTATTTATCTCCTTTGCGGGAATGTAACGGAACTGCTCGAATTCCA(C/G)TTCTTAGTTCCCACACAGGTAAGCATGTTTGCCCACCAAAGTCATCCTTCTCAGACATGTCATACTCATGAACTTCTATCCGAAGCAGCGCCAACTCCGGAACCGAAAGTGGGAACTCGAATACCTCATTCCAAGAAGGCAACCAACTAT
Unigene0019526	2309	T	*	C	CTTTAGAAAAATAAATAGGGAACGGATTGGATTATTGCTATTTGAATAGCCTCTTATGATTGTATTCCAGCTAAAAATTGTTGGACTGGAAAGCTGGGAGAAAACCCGGTAGGAATAATCAATGTCGCCTGAATTGGACAGAGCAGAAAA(T/C)GAAAGGATTTTGTAGATAAATGAGTCTTCATGAGATAAACCAAAAGAGATCCCAATAGCATGAAGCTTCTTCAGCTCAAGCATTGATCTGCATTTACCAAGAAGGTAGAGCAGAGTTCCATTTATATTTGCAGTTTTACAAGACAGTGAC
Unigene0019806	248	T	*	C	TACACTTAGATTTGTTTTTAAACTCATTACTTAACTTCCATTTGTAGAATTATTTGATATTATTACTATCAATAATCAAGCTGGTCCACCAAAGTTCGGGCGTTGTTGCCACCCCTCAGTGCTCCCATCACCTGCTATGTATGACATGCA(T/C)GACAATGGCACGAGACACAGTCCTCGACTTCTCAGATATTGCTTTGCTTCTCCATTTGTGTCACCTATGGCCGAATCCCCTTGCATCAATATGTTGTTTTGGTTTTGTGATGACTTCATATAGGGAACACTTAGTGTCTGCATGAAGAAG
Unigene0019828	603	T	*	C	GGAAACTAGGGAAGATCAATGTTGAACTAGAGGATCCAACAAATCGATGCGTTAGTATTGGGCTTATTGGGAAGGGTTCAGTGGGCAGGCTGAGTTCTTGATTATCGGGAATTATGGAGTTTACTGTTTGCAAAGGGTGAAAAGTGGCGG(T/C)GAGTCTTGACGGCAGTTGTTTTTTCAGAAGTTTTTGTAGCATGGAAGCCATTGAAGAACCGAAGACAGCTTTTTCCATTTCAATGTATTGTTCTTCAAATTTTGTATAGTCTCTCTTTCCACGGTACGTGATTCAGAAGGTCTGATTTGG
Unigene0019914	325	G	*	C	CTCCCACATCAAACACTACCTAAATCAACCCATTACGGTTTCAATCACCAAGCTTTGTTTTTTTCATGGGGCTTCTTCTTCTTTCTTCTTCAATTACAAAACCCACCAAGGATTAACCTTTTCCTTCTTCCATTCCTTCATTCTACTAAT(C/G)TGCCTTTTCTAGGGTTCTTCATGCTTTCCTGCATAAACTTTCCCTAAATCAGTAGAAATTCTTTTACTCTTCTCATCCATTTCTTTATTTTAAACGTGTCTCACTCTGCTTTCCGTGTAGGATCTGCAGAAGTTGACTCTGAAATAATCA
Unigene0019914	1459	T	*	C	GCAATTACATTCTCTTTTGGCTTTGGATGATGAGTCGTCATCCTCAAGGAGAAAAACTCCTATTCTGTCAAGAAACTCAAATGGACTTCACCTTCAAAAGGTCATGCTTATGAACCAAAGCACGTCATTAGGGGATTTACTTGAAAAAGA(T/C)ATGGTTAATGGCTATAGTCCAAGTCCCGATTCAGCATCGTCATCGTCTTCGCCAGCATCTTCAACTGCTTCAATGAATGCAGAGAGCTTTCTCAACGCCTTGTGGAGTTTATCGCCGAAAGTCATGGTTGTTACCGAACAGGATTCAAAT
Unigene0020122	333	G	*	C	AGTTTACGTCGCCAGAGAAATCAAGAGTAAATATGTGATTGCGTTGAAGGTTATCTTTAAGGAACAACTAGAAAAGTATAATATTCTCCATCAACTAAGGAGGGAAATGGAGATACAGATAAGTCTTAAACATCCAAACATCTTGCGTCT(C/G)TATGGTTGGTTTTATGATGACGAGCGTGTTTTCTTGATTCTTGAGTACGCTCATAATGGTGAGCTATACAAGGAGCTTCGCAAAAGAGGTCATTTCTCAGAGAAGCAAGCTGCAAAGTACATTTTAAGCCTCACGAAGGCATTGGCATAT
Unigene0020168	1241	G	*	C	ATCTTATGATGGTGTTGCTCCTCCAAAAAATCTGACTTTGCCACCACCTGGTGTTCCAGAAAGCGTGGTGACCCTTGTAAAAATGGTTAATGAAGCTACAGCAAATATTCCGAACTGGCCATCATAGGAATTTCTCATGGTGGTTGCAAT(C/G)TGTTCAGAATGCTGGAGCTCTTTGCTATTTCACACATGTTGGCAACTGTGTATCTGTAACTCTTTATGTAGATGACTTTACACACTTGAGGCAAACATGGATATTTTTTCAATGCTTGATTAAAAAAAATGTGGTGTGTTTTCAGTATGT
Unigene0020328	1999	T	*	C	TGTTCAGTCAGGGTATGGTCCTCCATCATATGGTGCTCCAGCAGGCAGTCAAACCGGTTATGGTCAGGCCTATGGTGCTGGTTATCCTCAGGCCCCAGCATATTCTGCTGATGCTAATGCTGGTGGGAATGCTCGTGGGGGTAGCTATGA(T/C)GGAGCACCTGCACAGGCAGCTCAGCAGACTAGTGTTGCCAAGTCACCTAAGAGCTGATATCGTAGTTTGTTTATTATGGATTACTGTATTTTCTTCTGTTTTTATTGTATGTCTACCTAGCTTTGCATCCATGACATTGAAGCATTTCTA
Unigene0020412	768	A	*	C	AGAGACAGAAGACCCTGTTTTTAGGTTGTGCCAGATGTTGTTGGCGGTGGCTTCTGCTTTTTTGCTCCAAGAATCGAACATGTGGAGAATTGATTCCATGGGACTGTTGGCAGGTTTTTCGACAGGGGTGTGTTGAATATAAGGATGATG(A/C)TCATGTTGGTAATACTGAACCTGAGGTTGTTGTTGTTGTTGTGGATCGGTTTGTAAAGCTGCTTTTTTGTTGTCTGGGTGACTACTTGGGACTGCTGGTGCTCCCATCATGTGAGTTCCCCAATTCTCAGATGTAGAAGGAGGTGATGAC
Unigene0020503	1914	A	*	C	CTCACGGTGAATTTGATATAGAAATAAATACGACAGCAGAACCTGATCCTGATGACAGCGTGGTTTCCACACCAAAGTTATCTACATTGCAGACTGATGAGCCAGATCCGGATGACCAAGAGCTCCAGAGGATAAATGGTGCCATGACTG(A/C)TGTATGTAATCGATTGCAAAAGGCCTTGGAGATGCTTAAAAGTGAAGTTAGTCCAATGCAAAGTACTTCAATTCTCCAAACTCTCTTGAAAATAATTAGGAATGTGATTGAACATCCTGAGATGGAAAAATACAAGAGATTGCGGAAGGC
Unigene0020505	804	A	*	C	TAATTCACAACCTCCATGGCCAAAAATGAAACCTTCTGATGTGCAAAAGTATGCAAAGGTGTTTATGGAAGTTGACACCGACAGGGATGGGAAAATCACTGGGGAGCAGGCACGCAGTCTATTTTTAAGTTGGAGATTACCGATAGATGT(A/C)TTAAAGAAGGTGTGGGACTTATCTGATCAGGATAGTGATAGCATGCTGTCTTTGAAGGAGTTTTGCTTTGCTCTTTATTTGATGGAGCGGTATAGGGAAGGTCGTCCTCTTCCGCAGTCTCTTCCAAGTAATGTTATATTTGACGAAACA
Unigene0020505	852	G	*	C	GTATGCAAAGGTGTTTATGGAAGTTGACACCGACAGGGATGGGAAAATCACTGGGGAGCAGGCACGCAGTCTATTTTTAAGTTGGAGATTACCGATAGATGTATTAAAGAAGGTGTGGGACTTATCTGATCAGGATAGTGATAGCATGCT(C/G)TCTTTGAAGGAGTTTTGCTTTGCTCTTTATTTGATGGAGCGGTATAGGGAAGGTCGTCCTCTTCCGCAGTCTCTTCCAAGTAATGTTATATTTGACGAAACATTGATGTCTATGACGGGGCATCCAAAAATCCCTCATGGAAATGCAGCA
Unigene0020538	237	T	*	C	TTTCTTAGCTATTCCATATACATGAGGATTTACAAATGTAGCATTTGATAAGATTGCCATGTCAAGCTCAACACTTGAAAATCCAGCTTTTGCTATACTCTCTCCTGTTTCCCTAGAAAGATGGCACCCGTCTGCAATTGTCTGTTGCAG(T/C)GGATCAAGAACTCCCTGTAAAAATCGGAGAAATGTTCCATCTTTTGCAGCTACATGTTCCACAAACACATAGACTCCACCAGGTCGCAACACCCTCATCACTTCTTTAAGTGTCAGATTGACATCTTTAACAGAACACAAGACAAGTGTT
Unigene0020553	472	G	*	C	ACGGTCCTAGTGCCAGTGTTGGTGGCTATGGTTATTTGCTTCAGCCTCTCTGGTGGGTCGGAATGGTTACCATGATTGTTGGAGAGATAGCGAATTTTGTAGCATACATTTACGCCCCGGCTGTTCTTGTCACTCCATTAGGTGCTTTGA(C/G)TATTATTGTTAGTGCTGTCTTGGCACATTTTATCTTGAAGGAAAAGTTACAAAAAATGGGCATGCTGGGGTGTCTTATATGCATTTTGGGGTCCACTATTATTGTACTCCATTCACCGCAAGAGAAGTCGCTTAGTTCTGTACAACAGAT
Unigene0020694	534	T	*	C	GCGGTTATTGGGAAAGAAAGTGATATTCATTACTGGAACTGATGAACATGGTGAGAAAATTGCAACTGCTGCTATGGCCCAGGGTTCCACTCCACCTGACCATTGTAATCTCATTTCACAGGCTTACAAGACGCTTTGGAAAGATCTAGA(T/C)ATTTCGTATGACAAGTTCATTAGAACAACTGATAGCAAGCATCAAGCAATTGTAAAGGAATTTTATTCGAGGGTGCTTGCCAATGGTGACATTTACCGAGCTGATTATGAGGGAATTTACTGTGTCAGCTGTGAGGAGTATAAGGATGAG
Unigene0021100	52	T	*	C	NNNNNNNNNNNNNNNNNNNNNNNNNNNNNNNNNNNNNNNNNNNNNNNNNNNNNNNNNNNNNNNNNNNNNNNNNNNNNNNNNNNNNNNNNNNNNNNNNNNGTTCTTCAACACAGTCAATATAGACAGCAGAGCTAGCACGCAAAGCAACTT(T/C)AATGCTGAGTACAACAACATCATACACGACAAAGATAACATATTTGGCCTTGGCCGTAATAATGTTACATGAAAAAATGAAGGCAGTGCCTTCAAAGCTACCTAGCTTTTGTATTGGTTGAGTAATTTGATTTAGACTATCATTCAAGTA
Unigene0021100	139	T	*	C	NNNNNNNNNNNNGTTCTTCAACACAGTCAATATAGACAGCAGAGCTAGCACGCAAAGCAACTTTAATGCTGAGTACAACAACATCATACACGACAAAGATAACATATTTGGCCTTGGCCGTAATAATGTTACATGAAAAAATGAAGGCAG(T/C)GCCTTCAAAGCTACCTAGCTTTTGTATTGGTTGAGTAATTTGATTTAGACTATCATTCAAGTAATAACAATTACAACATATATTCAAATTCATCAAGACTTCAAATAAAATTGAGAGAATTTTTTTACTTGGATGTTGAATTTGAAGGGG
Unigene0021535	426	G	*	C	ACACTCGGTGTGCCGAAGGTGAAGCCTGAGATGTCGGCTCATTATGGACTATTCTTGACAGGAAGAACATTAAAAGGATCTCTATTTGGAGGATGGAAACCTAAAACCGATCTTCCTTCACTAGTAGAAAAATATATGAACAAGGAAATT(C/G)AGATTGATGACTACATAACACACAATTTGGCATTTGATGACATTAACAAAGCTTTCAACCTCATGAAAGAAGGAAAGTGTCTTCGTTGTGTTATCCACATGCCATGATAATTTCTTTGGCTTCTTGTTTCTTTCATGAAATTATTATCCT
Unigene0021982	1722	T	*	C	TCCTTATTATTCTTTAGTCCCTTTCATAGTGAGAGAAAGAATGAAAAGAAGAGACATTTTTCTTTTAAAGATGATCATATATTGCATTTGGAGGTAACGGGTGGAACAGAGAATATGTTGTTAACAATTACCTGTACCTGGAACAGAGAA(T/C)ATGTTTTACAAGGAATATGTTGTAACAATTACCTGTACCTGGAGCTTATGGACCAATTCAATTTCAAAAACAGGACACTGTTTGTGATTCACATTTTTTCTTCTTTTGTATACTGTTCAGCTTAAGTTTGTTTAGTCAAGATTAGTTACT
Unigene0022217	353	T	*	C	TTTAGGTTTATTCGACTCACTTCCGTCTGACTTACTCCTCAAAATCATACGACTGTTAGACCCTAAACACGCCGCTAAACTCTGCATCGTTTGCAAATCATGGCGATCTCTTGTTTCCGATAACCAACTCTGGTCTGATTTCCTTCAGAA(T/C)AACCAACCTCTACACTACGATTCCATTATCTTCTCGGAAACCAAATTAACCTCTGGTTATCCTCTTCCGTTCTTTGTTACTCAGACGCCACGTGTGTTGTCGTTTAAGCATGTTTATGGCCAGCGGGAACGGCTTCCTCCTGCTGTTATC
Unigene0022458	381	G	*	C	CGGCTATTGTCTTTTTCAGCTCGGAGTCGTATATGTCGGTGGGAAGATGGTGAAGCTGTGTGGGTGCATATGTGGTGGCGGTGGAGTTTCCTAGAAAGTTTTCGAGCTTGTGTCCGGCGGTGAATATGGAGAGGTTGGTGGTTCTTGTGT(C/G)AGTTGGCTCCGGCGATGTGTCGAGGGTGAGAGATGGTACTGTTGGGGGAGGAAAAGGGGTGAAGGAGTGGAAGAGAGAGTGTGAAGGAGTAGGGAAGTGATTGGAAAGAGAGAAAGCGAGGGAGGTGTTGTTAGCGTTTGTGGGGGGTGA
Unigene0022584	482	T	*	C	AGAGTGGAACGAGAATAAGGATGATCTGATAGATTTATTCGGAAATGTTAGAGATGATTGGTTGGAGAAGGATTTCACTGGTTGGATTCAAGCCAACAGATTCTATCCTGGTGTTACTGATGCATTAAGATTTGCAAGCTCAAGGGTCTA(T/C)ATTGTTACCACAAAACAGAGCCGCTTTGCCGATGCTTTACTTAGAGAACTTGCTGCAATAACTATACCACCAGAAAGAATATATGGTCTAGGAACTGGTCCTAAGGTAGAAGTGCTGAAGAAGCTTCAAAAAATGCCAGAACACCAAGGA
Unigene0022906	425	T	*	C	TTCATAACAGCTTGTATGTGCAATCCAGGTTTATATAGAGATAAACCTAAGATAAGCTACCTAGCTCACTAAGCATAACATAATCATAACTACGGTAACTGAACTGACAAAATGTGCTGGGTCAGCACATTCTATTATGTAGAAGAGGGG(T/C)GGACATCACAGCTTTGCTAGAAACATTCAACTACTGTAAAAAAAGTGAGCTAGAGACATCCAGCTTACAAGTGCAAAGCTCCCGTGATTGCAGAGGGATTTTATCAGCAACACAATCACAGACTTTTTCCCAGGCTCGGGTAATTCAAAC
Unigene0022906	735	T	*	C	CATAAGTAGATGGACCATTTAGTATATTGATGTTAATAATGTCTTTCCCAATGGGCACCTCGTTAGTCGTGAAGAGGTTGTAACCTCCCAAGTTTGAAGCACCCAATAAATTACGGGTTTGCAGACTTAACAGGGCTCTTTATGGCCTTA(T/C/G)ACAAACACCTAATGCTGGGTATGAACGGATCAAATCTACCTTGTGACAGTTTGACTTCATTTCCACTGCTGTGATCCCTCTGTATTCATCTTCTTTAAGGCTATCGCTTGTCTTTATGTTTTTATCTATGTGGATTACACTATTTTTATT
Unigene0022964	1951	T	*	C	TGGTCTGATGTTGGATTACATTATCCGGCAACAGCCAAAGTTATTAGAGTCCACTAATATTAGAGACCAGAACCTGCTTTTTCCTTCAAACACATATGTTGCCATGATCAGATTTTTAATGAAGTGCTTTGAGTCAGAATTGGAAAAGAA(T/C)AAGACCTTAGAAGGCTCGCCTGAATTTATATCATCAGTGAAGACATTTTGTTTGCTCTTGGAACACTCTATGTCATTTGAAGGCTCTGTTGAGTTGCATGTCACTTCTTCCAAAGCATTGCTTATAATTGGATCGCATATGCCAGAGGTG
Unigene0023498	1709	A	*	C	CAGGCAAATTGTATTCAGAAAAGTCCTGATTACTGCGACTGGGTTGAAAATAATAAAAGTAAGTTTCTTCTTAAACGAGAATGATTTGGGTTCCATTATGTATGATTTGGTTAATGGTGGTATGATAGTTTTAGTTGTAATTTGTAAGGG(A/C)TTATATTCTATCATTTCTCAGACGTGGAATCAGCACTTGTAAGTGAAATAAGTTTGCAGTCTGTTATNNNNNNNNNNNNNNNNNNNNNNNNNNNNNNNNNNNNNNNNNNNNNNNNNNNNNNNNNNNNNNNNNNNNNNNNNNNNNNNNNNN
Unigene0023537	1376	T	*	C	AATGTTCCATGGCTGGTAAAAAAGGGAAAGAACGGTTGTGATAGACTGGGATTCCTTTAATTGGTCTTAACCCTTCCGAGGAGGACGAGGACGATACATCGAGCAATGAAACGCCGTAATTTATGTGATTCATTGAAGTAGAATTTGTTG(T/C)GGTACTCGTTGTAGTTGTCGAGTTGTGGTGATGATGAAGATTCGGGAAATGAGCTTGTTGGGTTTGATAATAAGGGTTATGAGCTTGTTGTTGCTGTTGTTGCTGTTGTNNNNNNNNNNNNNNNNNNNNNNNNNNNNNNNNNNNNNNNNN
Unigene0023686	1784	T	*	C	AGCAAGGTAGTGTATTGGAAGCCTACCTGTTACCAATATTTGACCCGAATATATCTCCCAGAAATGTGGCTATAATTGCAAAGAAGATTGACAAAGATTTAAGATCCTCCTGATGCTTAAAGGTGGAACAAGGTGCCAATGCGGCTGCCA(T/C)GATTCAATACCCCACTTTCTTGCGAGTTCAGTTGATTCTCAAGATCATCTCAGGTGAAGGTTAGATTCATAGGGACAGGGAAGCCACCGCTATGGTGCTGTCATCATTCAATCCCACTACTTTCCTCTCTTTTAGAAAAAAAAGGTGTTA
Unigene0024319	479	T	*	C	ACACAAAGCACAGAAAGACAATGAAAATTTTAAAGAAGAGAAATTAGAAAACGCAAAAGGAGAGGAAACAAACATTATTGGACATGAAGAGCACTTTAGTGTAGAAGTACAAGGCCAACTGCAAAAAGAATTTGATCCCAAAAAGTATGG(T/C)GTTGAAGGGCCAAAGAGTGGTGAATTGATAGATCTTGAAGAACAAGGGAGGGTGGAGCTTGAGGAGGAAGATCCAGAAGAAGATCCAGAGGAACTGCCCGAACAAACCGAGACATTGGATGAAGAGCATATAGATTTTGAAGATATTGCA
Unigene0024319	656	T	*	C	GATAGATCTTGAAGAACAAGGGAGGGTGGAGCTTGAGGAGGAAGATCCAGAAGAAGATCCAGAGGAACTGCCCGAACAAACCGAGACATTGGATGAAGAGCATATAGATTTTGAAGATATTGCAAAGCAGCGAAAGATTAGGAAAGAGCA(T/C)GAGATATTTGTTGGTGGGTTGGATCGTGATGCTACAGAGGAAGATCTGAGAAAGGTTTTTCAGAGGATTGGGGAGGTAGTGGAAGTCAGGTTGCATAAAAATTCGTCAACAAATAAAAATAAGGGATACGCTTTTGTGAAGTTTGCCATT
Unigene0024637	63	T	*	C	NNNNNNNNNNNNNNNNNNNNNNNNNNNNNNNNNNNNNNNNNNNNNNNNNNNNNNNNNNNNNNNNNNNNNNNNNNNNNNNNNNNNNNNNGGTCAGATTACCGGGGCAAGTCCTGCAATTCCTGGAATGTTCCCAAATATGTTTCCCATGGC(T/C)ACAAGTCAGTTGCAGCAATTTAATACTCTCCCTGTCTTGCCAGTTCAGGCTATGACACAACAGGCTACACGACATGCTAGGCGGGTGTATGTTGGGGGCCTCTCTCCTACAGCTAATGAGCAGTCCGTTGCAACTTTCTTCAGTCAGGTT
Unigene0024657	2823	G	*	C	GAACCAAAGGAGCACTACCGCAACCTCAATTGTGGCACCTATATGCTATGCCCACCATGCTGCAGCTCAGATGGCACAATTTCTGAATTTCGATGATTTATCAGAGAGAAACATCCCCATTCCAGAGCTTCCTAGGTTACATAAGAATGT(C/G)AAGACCTCCATGTTCTTCTGTTGAGGTGGAACAGTAAATACATTTTGATTGACCAGTTAAAGTGTAAATATCTCTGGGATGTACAGTTAACATAGATGTTAAGACCCAAGTTTTGTTTTAGGAAATCTCAGAGAGGGCATTGGGGAATAT
Unigene0024744	806	A	*	C	GGGTGGCAGTTGATTATTTGGAGCTGAAATCTGTTTCGACCGGTGGTTTGAGGCAAAGGGAGTTAGGGCTTTGTGGAAAAGAAAGGGAAAATTTCGTGCCATGCCATAATATCACTGCCAATTCGGCATCAGGATTTGAGCAGGGGGAGG(A/C)GCTGGATCGGCACTGCCAAGTGTTGAAGGAAGAAGATCAATGTTTGGTTCGTCCTCCCAAGGAATATAAAATTCCCCTGCGCTGGCCCAGTGGCAGAGATATTATATGGAGTGGGAATGTGAAGATAACCAAAGATCAATTTCTTTCGTC
Unigene0024864	736	T	*	C	TACAAAAAAGCACAATGTAAAGAATAGAGAGAAGTATTAGGGAAATGTTAAGTGTTGTTTCTTTCCTCTAACATTTTCTCTCTCTGTGTCTCTCTGTCAAATATTGTTAGCTTGTAACGAGAAGTAGGTTTGAAGTTAGATGAGATGTGG(T/C)GGTGGTTGTGGAGTGTGATGAAGGGGAGAAAATCTTTGTCTGATTCTGGATATATTGGGTTGGGTGCAAAGCTTTTTAGTGTAGGTGAGTATGAGTGAGTTGAGTAGATGTTTCTTTTTCCGTGACTGTTGTTAACTATAATTATCTTTC
Unigene0025194	1379	G	*	C	CTTTTTACCTTGAGCTTTCTTCTCTGTAAGAGGCTGAGACTTGACCTCCTTGGGCACCAAACGAATGTCAAAAGCCACTTCCGAAGGCACATAGTTTTTCAAACTAGACTCCAGATTGACAAGTGGGGTATCAAGTGACCCAAAGAGGAA(C/G)TCTCTCACATCTTCATCATTCTCAAGATCACCTCCAAGCGTGTTCAGATAAAGTGTGGCTCTATCGCGAACCTCATCATCACTGTCAAAAAGACATCGCCTTAGCAGAACAAATATGCGGGGCTTTAATGCATCAACAGAAGCACCAAAT
Unigene0025924	2118	G	*	C	TGTTATTTTTGCTTATTTGTTGACAGAAGGCTTCAACATGTAATCATAGTGAGAGATCAAATCTGTATAATTGAGACATTTGGAACAGCTTTTACCCTCCAAAGTAGTTAGAAACTGTTTTCCACATTTTGAAGTGTGATCATTTCACGT(C/G)AAGGTTGTTTTAATTATGGCATTGTTAAAAAAATAAATATTTAAGATGAATGTGCTATTGTCTCTAAGCCGAGACATTTGGACAAATTTTACCCTCCAAATAAATATCTTAATTGTGGCATTGTAAATTTGAAAAAGAAATAGTTTACTT
Unigene0026526	789	G	*	C	AGAATTTAATTCTGAACCAGTTCTTCTCACATCACTCCCGCCATAAGTAGAGTTGTTCGACAGACCCGATAGTGTCTGCAAGCTCTTAGCATCACCTTTCTTTTCTCCGTAGTAGATGTTGAATGGAAAACAATTCATTGCAACCTGATT(C/G)AAACCGCACTATTGCGACCAAGCTCGGTGGTTGTTGTAGGCAAGTAGTTGGTCTGAAGTAGTTAATGATCTTCGGTTAATGTTGAATCGTACTTCACGAAAACCCGAATTTGAATTATGGATAGAACAATCCCTAGTCAAGTTTTACTTA
Unigene0026757	3442	T	*	C	CAAATGAGATCGTATATCGGTAGCAACACGACGATCGGGGCAGACCATAGATCGAAAACACCTTCCACCGTTCTACATTTTAAGCCATATATAAGCGATTAAGGTAACTAACTAACTAACTTGTTATTAATTACCTGAGCATGTCTCCCG(T/C)GGGCAATTTGAGGCCGCTTAACGCCGGAGAAATGCTAAAAGTGTTGCCGTTGCAGTCGTTATTATAAAATGAAGGATGTCCAAGAGGCATAGGCCTGTCTGGAATTTGAGGAACTTCGATATCGCCTTCCAACATCTTCAAAGCATCTGA
Unigene0027258	348	T	*	C	CAGATCAAACTTAAACTGTTGGACATTTTTTTTAAAGAAAAACAAACTATAACATGTCCTGTAATTTCAAGTTCAACCTGTTTTTTTAGAATCATCAAGTTCATCCTGTTATTTATACATTTAATAATGTATGTATGCAGACCTACTTTA(T/C)GCGAGTTGTAATGCTTCTTCACTTTTCAAGTCGAACACCCTGATCAGCGCATCTTCCACGGCCTTGTCTGGCGTGGACGCACCAGATGTTACACCGATCCTTAATGGACCCTTTGGTAGAAAGTTTTCTGTTTCCACAAGCTCGCCATGG
Unigene0027276	1004	T	*	C	CACATCTGATTCTGCAAGGCCATTTTCGATGCTTGGACTTGGTGATATTGTTATTCCCGGTATTTTTGTGGCATTGGCTTTGCGGTTTGATGTGTCTAGAGGGAAACCACCCCAGTACTTCAAGAGTGCATTTTTAGGATACACTTTTGG(T/C)GTGGTCCTTACAATTGTTGTGATGAACTGGTTTCAGGCTGCTCAGCCCGCTCTTTTGTATATTGTACCTGCTGTAATTGGATTTTTGGCTGCCCATTGTATTTGGAATGGTGAAGTCAAACAGTTGTTGGAATTCGATGAGTCCAAGGCT
Unigene0028160	807	G	*	C	CTGAACCTGTTTTAGCAATGGCAACTATATCTTTACTTTGAAGGGCAATGGGCCACGATTGTGCCTGAATTGGAGTTGGGGCTGAGAACCCAGCATTTTGTACCTCTTTAAGAATCTCAGATGGAATTCCAGAAGACGCAAATGACGTAA(C/G)AGGTGGAGGCACATTATCTCCCGTAACAGTGATCTCATGACGACGTCTATAAGCCTCTGGAGTTAATGCAGGTCCTGTATCTGATGCTACNNNNNNNNNNNNNNNNNNNNNNNNNNNNNNNNNNNNNNNNNNNNNNNNNNNNNNNNNNNN
Unigene0028203	256	G	*	C	AAATAGGAAGAGGAGCACCGTTCCATTCTCCCAAGCATTTAAGAAGGGGATCAATGATTTTTCCTTGGCAAATAGCTGTGAATAGTTTATCACACTCCTCCCCTGGTGAAATCACATTTTCTCCTGTTAGCAAACCAGTCCCCAACTCTT(C/G)TCTCACAAACTTGTAAAGTGGATAAGATCTGCATCCGTTGATCTTGTTTGGAACTCTAGGATTTCCACTCTCATACGCAGCCCTTGCACTTTCAACCTCTTTTGGCAAGAGGGTCTTCAACTCATCCTCAAAAGTTGCAATCTTTTGGAA
Unigene0028336	754	T	*	C	AAGGAGGTGCATGGGATGAGATAGACTTTGAATTCTTGGGAAATTTGAGTGGTGATCCTTACATAGTTCACACCAATGTGTTTAGCCAAGGAAAAGGCAATAGAGAGCAACAATTTCATCTATGGTTTGACCCAACCGCAGATTTTCACA(T/C)GTATTCGATTCTATGGAATCCACAACGTATTGTGTTTTCTGTGGACGGGACACCAATAAGGGAGTTCAAGAATTTGGAAAGAATAGGAGTTCCATTTCCTAAGAATCAAGCAATGAGGATATACTCAAGCCTTTGGAATGCTGATGATTG
Unigene0028336	955	G	*	C	CACCAATAAGGGAGTTCAAGAATTTGGAAAGAATAGGAGTTCCATTTCCTAAGAATCAAGCAATGAGGATATACTCAAGCCTTTGGAATGCTGATGATTGGGCAACAAGAGGTGGACTTATAAAAACAGATTGGTCCAAAGCTCCATTCA(C/G)TGCTTCATACAGAAACTTCAATGCAAATAATGCTTGTATATGGAGCAGTGGAAAATCATCATGCAAATCTTCTTCTCCTCCATCTGCTGCATCATGGCTATCACAAGAGCTTGACTCAACTGGTTTGCAGAGGATGAGATGGGTGCAGAA
Unigene0028624	131	T	*	C	NNNNNNNNNNNNNNNNNNNNCGCAAAAGTAGCATTCAAAATCATTCGAGCTTCTTCAGTAGACATAAAAATCACTTCTTGAACATCAGATATAAAATAAAGACAGTATAATAAGATGGTATTCGTCTTATATTTAAAAACACAATAAAAA(T/C)AATGTACCAGACAGAAATCCAAAACTCGGCAATCCAGTTCTAGAATAGAAAAAAAACTACAAAAAGGTGGACACAATCCATGAAATTGTTAAGATATTAAACTCTCTTCTCAATCTAATTCAATCAAGCATGTCTGTTCCTCTTCTTGGC
Unigene0029011	37	T	*	C	NNNNNNNNNNNNNNNNNNNNNNNNNNNNNNNNNNNNNNNNNNNNNNNNNNNNNNNNNNNNNNNNNNNNNNNNNNNNNNNNNNNNNNNNNNNNNNNNNNNNNNNNNNNNNNNNNNCATTCATCATGTTTCTTTGCTATGCTGCTAACTTTA(T/C)ATTGATCCTCAGAATCTCGGTCATGTGATGGCATAGTAGATTTTTCATTCAGTAGACTTGATAAACTTTCACAAAATTCATTGTATTTTCTTAGATCTCCTGCAGATTTTGATATTTGTACAACACAATGAGCTGGAGCAACTTCTATCA
Unigene0029011	73	G	*	C	NNNNNNNNNNNNNNNNNNNNNNNNNNNNNNNNNNNNNNNNNNNNNNNNNNNNNNNNNNNNNNNNNNNNNNNNNNNNNNCATTCATCATGTTTCTTTGCTATGCTGCTAACTTTATATTGATCCTCAGAATCTCGGTCATGTGATGGCATA(C/G)TAGATTTTTCATTCAGTAGACTTGATAAACTTTCACAAAATTCATTGTATTTTCTTAGATCTCCTGCAGATTTTGATATTTGTACAACACAATGAGCTGGAGCAACTTCTATCACCTCAGCAGATAGGTCAAAGTATGATCTAGAACTTC
Unigene0029960	334	G	*	C	TCAAATTCAACAACGTAACAGCAACACTAACGCATTCTTTCTCTCTTCAAAAATCGCGTTAATGTAATTTTTCATTTGTTTCTTGAATTTCAGTCAACTAGGAACCATCGCAGCAGAAATTTTCGGGTCAAAATGTGCTCCTCCATTCCA(C/G)AAAACGCCACCGTTGTTGGTTGTGGATCGCTGACCGTCGATTTCTTGGCCACCGTTGCTGCTTACCCCAAGCCAGATGACAAAATCAGAACCACCACCTTGAAGGTTCAAGGAGGTGGCAATGCAGCCAATGCTTTAACCTGTCTCGCTC
Unigene0030322	111	T	*	C	NNNNNNNNNNNNNNNNNNNNNNNNNNNNNNNNNNNNNNNNAATCTATCCCATAAGTGGATTGGAGAGGTGACAAGTGTAGACAAAAATCTCCAACTCCCAATGAAATTATTGCTTTGGATAACACAAGATAAGAGCACAACAGCAGCATC(T/C)CAGTATAAATCTACACTCATATCCAACTTACCAAATCACCATTCATAAGAATACAATTATCAAAAGCTTATCAATCTTTTCAATTTCATTGCAATACACACGATGGCCGCTTCATCCATGGCTCTCTCTTCCCCAACCTTGGCTGGCAAG
Unigene0030349	84	T	*	C	NNNNNNNNNNNNNNNNNNNNNNNNNNNNNNNNNNNNNNNNNNNNNNNNNNNNNNNNNNNNNNNNNNNGTAACAAAAGACTCACCGCCCCCGCCTCTCTGCTAATTTACAATTTATACGAATTTTGAATTTCCTCTTCTTTTTTCAATCTC(T/C)GAACTCGGAACCATTTAGCATTAAATTAGGAGTTTTTTCAATCTCCAAACCCTTAGCATTCAGAAAAGTTAAGGATTTTTTAGGGTTAGGGTTTCAATGGGTAGCAAGGTCTCCGACGACCACCTCTACACCGTCCGATCAATAGTCGGT
Unigene0030349	1640	G	*	C	CAATTCCCAATTTTGCAAACATTCCAAAGAAGGTAACCAAATTTACTGGTTTTGATAAACCAACAAAGCAAAGCAATTCTCTAACAAGTGGCGGCAACTTGATAATATGTCCCATGACTCTTCTTGGGCAGTGGAAGGCAGAGATTGAAA(C/G)TCACGTGCGCCCTGGGTCCCTGTCTCTATATGTTCATTATGGGCAAAGTAGACCCAAAGATGCAAAAAGTCTAGCTCAATGTGACGTTGTAATTACTACATATGGAGTTTTGGCTTCTGATTTTTCCAGTGAGAATGCAGAGAATAATGG
Unigene0030481	1541	G	*	C	TTTATTAGAAGCAGCAGTGTGTTTACTTAAGAAGATAACTTCATCAACAACTTCTCCAGTAACCTTTTCCCACTTTTCGTCCAAATAATCTTCCACAACTATACTCTTTCCATGAAGCAAAACCCTCAACCCTTCATTCACAAAACTCTT(C/G)ATATCATCCTGGAAATGGGGTCCGGGTTGCCAGCCTGGAAATGCTAACAGGGCATTGGCCGGGTTGATTGAAGCCGGGTCGATTGTTGTGGCAACAAGAAGAGACACCATTGGAAGATGATGATGATGNNNNNNNNNNNNNNNNNNNNNN
Unigene0030690	478	G	*	C	TGGTCAAGCAAGAGAAGTTTGTCAACATTGGTGGATGAAGGAAGCATTAGATATCTTGGTTCAAAGACTCATTTCTTCACAGCAACAATAAAAAAAAGATGTAAATGATGATTATATTAGAGAGGATTAGTTAATGAGAGAAAAGAACTT(C/G)TAGAGAAAGAGTTGACATTTTGTATACATCAATCGTGCATAGACATTCGNNNNNNNNNNNNNNNNNNNNNNNNNNNNNNNNNNNNNNNNNNNNNNNNNNNNNNNNNNNNNNNNNNNNNNNNNNNNNNNNNNNNNNNNNNNNNNNNNNNNN
Unigene0030988	329	G	*	C	GGAGGCCACGGTTGTCGTCACGCCGACTCCGTTGACGGTTTCTGGATCGTTTAAAGAAGGGAAGAACTCGTCCAGGAGACGTCAGCATTCCATGAGGCCTAGTTTGGATGCGGATGAGTTCATGAACTTGCTTCACGGTTCGGATCCGGT(C/G)AAGATGGAGCTTAATCGACTTGAGAATGATGTTAGAGATAAGGATAGGGAATTATCAGAAGCACAAGCTGAGATCAAAGCCTTGAAACACTCTGAACGATTGAGAGAAAAAGCCGTTGAAGAGCTTACTGAAGAATTGTCTAAGGTTGAT
Unigene0031034	503	A	*	C	CAAAACCTCCACCGCCTTCCCCAATCCAGCTCTTCCCAAACGTGAACTCACCTCCGAGACTTTAGCGGCGTAGCGTGGGATTCCGTCGTAGAAAACGTCATCAGCGGTGACACCGGCGGGATTTCTCTCCATGATTTCACGTACTGGAGG(A/C)GGAGTTGTGAAATCAGCGGGGTTGTTGTTGTTGGTAGTATTAGGTTTATGAGAGGCATCGGAATCGGCATCGGAGTTGGCGAAGACGCGGTCAACTTCGGCGGACCTAGAACAAAGACCTCCCATGAGTTGAGAAAACCAAACCAATAAT
Unigene0031037	582	T	*	C	TACTGGCATTCAACCCTTGCGGCAAAGAGTATGATATGTGTACCCCAGAAATCCCAGTCATGTTCACGTGTACTATTGCTTCTCTCCATTCATTTCAAAAGCCAACCAGTAAAATTTGCAATTATCTGACCACATCTAGTCTGTCGATCA(T/C)GTTCAACGCTCGCTCTTTGTCAATATCAAAATCAATCACAGGAAGCTTTGACAAAACCCTATTAAAAGATAACTCCTTGCTTTTACTTGATGAAAGACTACTACTCTTGGTCAGTCTGCATTTCTCACTCATTGTAGGCTTCAGACTGTC
Unigene0031115	508	T	*	C	ATCATTGTATAATCTCATAGATATCCACAGTAAAGTTGTTGCGTCTATAGTGAATAAAGCAGAGCCATTAGAAGCAACCTTAATTCACGCACCAATTTACAAGGACTCCCTTGTTTGTCATGATGGTAAAAGAAAGAATCGGAGTGAAAA(T/C)GGTGGCTGCTCTGACTCTAGGCAGACATCTACTGTACCTTCGGAAGATTCAACACCATCAAAACATAGCCATAAATCTGGAAGAACTCCATGCTCAAATGAAGAAGCATCAGGGTATAACTTGGGTAAAGGTGTCACTGGTTTTTCGTTG
Unigene0032258	555	T	*	C	CATCTCTGTCCATACCAAAACCCACGCTTATTTGTTCCATGTCTTCAGATTCATCTATGACGTTGTGATTTTGAACTACGCAAGCTGTTAGGAGTCCCAAGTGACGATGCTTCGACGATATAATGCATTGGTTAGTTGAATGGATAGTGG(T/C)GTTCTTGAGAAGGGAAGGGGCCAGGGAAACACGAGGTAAGTGGCTGTTGGAGTGTGAAATGAGTTTGCGGTTTTGAAGGAGAGAAGTATGATTGAAATGCAGTGAGAGTCTGTGCGCCATTGTTGTTGTTATCTGAAAGGGGAAAGAAGC
Unigene0033476	841	G	*	C	ACCAGTAAGAAGGTTGATTTTACACTCGTATGCGTAATCTTGAGATGGCAACCCACAGTCTTCAACACAATATTCATCTTGAACAACACTAGTTGGCCAAGGAACCTTTCTGCATTCCATGACCTCGAGTTGACAAAGAAGCCATCCCTT(C/G)ATAAAATCTTCAGAAATAAGTCGAGGAGCCATGTTAATAGGACGCATATAGTGGTTAATGATTCCAATTGGTAAAGGAGAAACTGCAAGAGCAAGATAGAGCTTTTTCACTTTTTTCTCCCGTATTTTGCCATGAAAGACAGAGCAATAC
[truncated: 7,849 more rows]

## Sheet: JI2822-VS-JI992
UniGene	Loc	Rbase(JI2822)	JI992	sequence
[truncated: 5,918 more rows]

## Sheet: JI2822-VS-Terese
UniGene	Loc	Rbase(2822)	Terese	sequence
[truncated: 5,132 more rows]

## Sheet: JI992-VS-Terese
UniGene	Loc	Rbase(JI2822)	JI992	Terese	sequence
[truncated: 5,133 more rows]
