# Supplementary material for: High-Throughput RNA-Seq Data Analysis of the Single Nucleotide Polymorphisms (SNPs) and Zygomorphic Flower Development in Pea (Pisum sativum L.)
Source: Int J Mol Sci. 2017 Dec 20;18(12):2710. doi: 10.3390/ijms18122710 (PMC5751311; doi:10.3390/ijms18122710)
Supplement: Supplementary file 1 [file ijms-18-02710-s001.zip › Table S3.xlsx]

## Sheet: Sheet1
Query id	Subject id	% identity	alignment length	mismatches	gap openings	q. start	q. end	s. start	s. end	e-value	bit score
Ps000001	Unigene0005426	100	201	0	0	1	201	271	471	1e-110	398
Ps000002	Unigene0042995	99.5	201	1	0	1	201	476	276	3e-108	391
Ps000003	Unigene0048915	100	201	0	0	1	201	210	410	1e-110	398
Ps000004	Unigene0006284	96.52	201	7	0	1	201	1072	1272	7e-105	379
Ps000005	Unigene0009131	99	201	2	0	1	201	3365	3165	8e-106	383
Ps000006	Unigene0042618	98.51	201	3	0	1	201	1080	1280	5e-105	380
Ps000007	Unigene0014125	100	201	0	0	1	201	478	278	1e-110	398
Ps000008	Unigene0042801	100	201	0	0	1	201	873	673	1e-110	398
Ps000009	Unigene0045468	99.5	201	0	1	1	201	1546	1347	8e-106	383
Ps000010	Unigene0044177	100	169	0	0	1	169	745	913	2e-91	335
Ps000012	Unigene0043612	99	201	2	0	1	201	552	752	2e-107	388
Ps000013	Unigene0042812	100	201	0	0	1	201	1096	896	1e-110	398
Ps000014	Unigene0036434	97.51	201	5	0	1	201	1043	1243	6e-105	380
Ps000015	Unigene0044667	100	201	0	0	1	201	605	405	1e-110	398
Ps000016	Unigene0056894	99.5	201	1	0	1	201	563	363	8e-110	396
Ps000017	Unigene0050060	99.15	118	1	0	84	201	1	118	1e-58	226
Ps000018	Unigene0049576	98.51	201	3	0	1	201	550	750	5e-105	380
Ps000019	Unigene0040864	99.5	201	1	0	1	201	838	1038	8e-110	396
Ps000020	Unigene0082440	93.6	203	1	1	1	191	424	626	2e-86	318
Ps000021	Unigene0042044	100	201	0	0	1	201	760	560	1e-110	398
Ps000022	Unigene0027867	97.67	172	4	0	1	172	714	885	3e-85	314
Ps000023	Unigene0084097	100	201	0	0	1	201	742	542	1e-110	398
Ps000024	Unigene0004470	100	201	0	0	1	201	928	1128	1e-110	398
Ps000026	Unigene0017246	98.51	202	2	1	1	201	282	81	1e-90	332
Ps000027	Unigene0041437	98	200	4	0	1	200	870	1069	2e-102	371
Ps000028	Unigene0018945	99.5	201	1	0	1	201	1823	1623	3e-108	391
Ps000029	Unigene0003980	99.5	201	1	0	1	201	411	211	8e-110	396
Ps000030	Unigene0046817	98.51	201	3	0	1	201	951	751	1e-106	385
Ps000031	Unigene0045000	98.51	201	3	0	1	201	382	182	4e-108	390
Ps000032	Unigene0007701	100	201	0	0	1	201	591	391	1e-110	398
Ps000033	Unigene0046893	97.04	169	3	1	1	169	690	524	2e-82	305
Ps000034	Unigene0022497	97.94	194	4	0	8	201	867	674	2e-98	358
Ps000035	Unigene0007394	98.51	201	3	0	1	201	704	504	1e-106	385
Ps000036	Unigene0041169	98.01	201	2	2	1	201	986	1184	3e-96	351
Ps000037	Unigene0033103	100	175	0	0	27	201	1057	883	4e-95	347
Ps000038	Unigene0045779	99.5	201	1	0	1	201	287	487	8e-110	396
Ps000040	Unigene0003781	99.5	201	1	0	1	201	509	709	8e-110	396
Ps000041	Unigene0046140	100	201	0	0	1	201	202	402	1e-110	398
Ps000042	Unigene0044665	98.51	201	3	0	1	201	1277	1477	5e-105	380
Ps000043	Unigene0003984	99.5	201	1	0	1	201	294	94	8e-110	396
Ps000044	Unigene0004223	99	201	2	0	1	201	480	680	2e-107	388
Ps000045	Unigene0043153	98.01	201	4	0	1	201	311	111	9e-106	382
Ps000046	Unigene0045617	99.5	199	1	0	1	199	705	903	2e-107	388
Ps000047	Unigene0042906	100	201	0	0	1	201	308	508	1e-110	398
Ps000048	Unigene0004769	100	103	0	0	99	201	420	318	2e-52	205
Ps000050	Unigene0036907	98.47	196	2	1	1	196	205	11	1e-99	362
Ps000051	Unigene0042017	99.5	201	1	0	1	201	425	625	3e-108	391
Ps000052	Unigene0060615	98.85	174	2	0	28	201	133	306	3e-91	334
Ps000054	Unigene0007039	98.51	201	3	0	1	201	147	347	1e-106	385
Ps000055	Unigene0043768	99	201	2	0	1	201	16	216	8e-106	383
Ps000056	Unigene0045457	96.52	201	7	0	1	201	70	270	4e-100	364
Ps000057	Unigene0044518	98.1	158	3	0	44	201	706	549	3e-79	295
Ps000058	Unigene0004038	98.7	154	2	0	48	201	150	303	8e-81	299
Ps000059	Unigene0052977	98.51	201	3	0	1	201	187	387	5e-105	380
Ps000060	Unigene0018150	99.5	201	1	0	1	201	292	92	8e-110	396
Ps000061	Unigene0004625	98.39	186	2	1	1	186	275	91	4e-92	337
Ps000062	Unigene0018130	100	201	0	0	1	201	382	582	1e-110	398
Ps000063	Unigene0046752	100	201	0	0	1	201	84	284	1e-110	398
Ps000064	Unigene0005384	98.04	204	1	1	1	201	204	1	1e-101	369
Ps000065	Unigene0042239	99.5	201	1	0	1	201	398	598	3e-108	391
Ps000066	Unigene0013251	99	201	2	0	1	201	634	834	2e-107	388
Ps000067	Unigene0030104	96.02	201	8	0	1	201	919	719	2e-91	335
Ps000068	Unigene0046528	99.5	202	0	1	1	201	969	768	2e-106	385
Ps000069	Unigene0041579	99.5	201	1	0	1	201	1500	1300	3e-108	391
Ps000071	Unigene0045776	99.5	201	1	0	1	201	338	538	3e-108	391
Ps000072	Unigene0006107	98.01	201	4	0	1	201	3925	3725	9e-106	382
Ps000073	Unigene0044492	100	101	0	0	101	201	1190	1090	6e-51	200
Ps000074	Unigene0042767	100	100	0	0	102	201	247	148	3e-50	198
Ps000075	Unigene0003336	98.01	201	4	0	1	201	1001	1201	9e-106	382
Ps000078	Unigene0041435	100	199	0	0	1	199	290	488	8e-110	396
Ps000079	Unigene0004670	99.5	201	1	0	1	201	306	106	8e-110	396
Ps000080	Unigene0043753	99.5	201	1	0	1	201	285	485	3e-108	391
Ps000081	Unigene0048718	100	101	0	0	101	201	133	233	6e-51	200
Ps000082	Unigene0048356	87.76	196	23	1	6	201	1485	1291	4e-48	191
Ps000083	Unigene0038502	98.97	194	2	0	1	194	276	83	1e-90	332
Ps000084	Unigene0038457	99	201	2	0	1	201	1468	1268	2e-107	388
Ps000085	Unigene0023104	100	201	0	0	1	201	1592	1392	1e-110	398
Ps000086	Unigene0086221	100	201	0	0	1	201	1476	1276	1e-110	398
Ps000087	Unigene0081872	99	201	2	0	1	201	1263	1063	2e-107	388
Ps000089	Unigene0085294	94.97	199	10	0	3	201	480	282	3e-98	357
Ps000090	Unigene0023223	99	201	2	0	1	201	210	410	2e-107	388
Ps000091	Unigene0043447	96.63	178	2	3	24	201	452	279	5e-76	283
Ps000092	Unigene0084542	98.01	201	3	1	1	201	314	513	9e-102	369
Ps000093	Unigene0045959	99	201	2	0	1	201	359	159	2e-107	388
Ps000094	Unigene0063490	98.51	134	2	0	1	134	266	133	2e-67	255
Ps000095	Unigene0047594	100	201	0	0	1	201	305	105	1e-110	398
Ps000096	Unigene0082830	99.32	148	1	0	1	148	1014	1161	1e-76	285
Ps000097	Unigene0023104	98.7	154	2	0	48	201	152	305	8e-81	300
Ps000098	Unigene0006831	99.01	203	0	1	1	201	1823	2025	3e-105	381
Ps000099	Unigene0045536	99.5	201	1	0	1	201	367	567	3e-108	391
Ps000100	Unigene0084353	99.5	201	1	0	1	201	296	96	8e-110	396
Ps000101	Unigene0033217	97.49	199	5	0	1	199	520	322	2e-97	355
Ps000102	Unigene0012723	99.5	201	1	0	1	201	532	332	3e-108	391
Ps000103	Unigene0051483	99.38	161	1	0	1	161	161	1	2e-84	311
Ps000104	Unigene0043734	99.01	203	0	1	1	201	1210	1412	7e-91	333
Ps000106	Unigene0007798	99	201	2	0	1	201	642	442	2e-107	388
Ps000107	Unigene0042277	99.5	201	1	0	1	201	1083	1283	3e-108	391
Ps000108	Unigene0041169	98.91	184	2	0	18	201	1169	986	1e-95	349
Ps000109	Unigene0042489	100	201	0	0	1	201	1246	1046	1e-110	398
Ps000110	Unigene0044782	100	133	0	0	69	201	1	133	5e-70	264
Ps000111	Unigene0005558	99.5	201	1	0	1	201	1588	1388	1e-95	349
Ps000112	Unigene0047688	100	100	0	0	102	201	1411	1312	3e-50	198
Ps000113	Unigene0043829	99.5	201	1	0	1	201	1437	1637	3e-108	391
Ps000114	Unigene0042913	99.5	201	1	0	1	201	915	1115	3e-108	391
Ps000115	Unigene0041436	99.5	201	1	0	1	201	222	22	3e-108	391
Ps000116	Unigene0043311	100	201	0	0	1	201	1404	1204	1e-110	398
Ps000117	Unigene0085865	97.97	197	2	2	5	201	184	378	7e-94	343
Ps000118	Unigene0056542	98.51	201	3	0	1	201	430	230	4e-108	390
Ps000119	Unigene0004731	99.48	191	1	0	11	201	300	490	8e-104	376
Ps000120	Unigene0045637	98.95	190	2	0	12	201	847	658	2e-102	371
Ps000121	Unigene0004400	98.51	201	3	0	1	201	39	239	1e-106	385
Ps000122	Unigene0010933	98.51	201	3	0	1	201	104	304	1e-106	385
Ps000123	Unigene0024963	99.5	201	1	0	1	201	462	662	8e-110	396
Ps000124	Unigene0046558	98.02	202	3	1	1	201	1408	1207	8e-102	369
Ps000125	Unigene0016788	99.5	201	1	0	1	201	396	596	3e-108	391
Ps000126	Unigene0045192	99	201	2	0	1	201	314	514	5e-109	393
Ps000127	Unigene0085294	98.51	201	3	0	1	201	1964	1764	1e-106	385
Ps000128	Unigene0036561	97.5	200	5	0	2	201	101	300	2e-104	378
Ps000129	Unigene0047054	99.5	201	1	0	1	201	1182	1382	3e-108	391
Ps000130	Unigene0049886	99.5	201	1	0	1	201	528	328	3e-108	391
Ps000131	Unigene0002868	99.5	201	1	0	1	201	1615	1415	8e-110	396
Ps000132	Unigene0045105	99.5	201	1	0	1	201	531	331	3e-97	354
Ps000133	Unigene0030941	94.53	201	8	2	1	201	358	161	4e-83	307
Ps000134	Unigene0042150	98.51	201	3	0	1	201	425	225	4e-108	390
Ps000136	Unigene0042555	100	201	0	0	1	201	458	658	1e-110	398
Ps000137	Unigene0009544	100	201	0	0	1	201	248	448	1e-110	398
Ps000138	Unigene0041307	100	201	0	0	1	201	439	239	1e-110	398
Ps000139	Unigene0004028	98.51	201	3	0	1	201	308	108	1e-106	385
Ps000140	Unigene0042596	99.5	201	1	0	1	201	242	442	3e-108	391
Ps000141	Unigene0004155	95.61	114	5	0	1	114	1792	1679	7e-50	197
Ps000142	Unigene0037679	99	201	2	0	1	201	910	710	2e-107	388
Ps000143	Unigene0043522	99.5	201	1	0	1	201	1543	1343	3e-108	391
Ps000144	Unigene0005302	97.51	201	5	0	1	201	1575	1375	1e-98	359
Ps000146	Unigene0083698	99.5	201	1	0	1	201	208	408	3e-108	391
Ps000147	Unigene0044171	99.5	202	0	1	1	201	296	497	2e-106	385
Ps000148	Unigene0044494	99	201	2	0	1	201	435	635	5e-109	393
Ps000151	Unigene0045891	99	201	2	0	1	201	1365	1565	2e-107	388
Ps000152	Unigene0013058	99	201	2	0	1	201	761	961	5e-109	393
Ps000153	Unigene0050261	99.5	201	1	0	1	201	422	222	3e-108	391
Ps000154	Unigene0008903	93.97	199	12	0	1	199	983	1181	3e-82	304
Ps000155	Unigene0011038	99.5	201	1	0	1	201	1521	1721	3e-108	391
Ps000156	Unigene0045814	99	201	2	0	1	201	589	389	2e-107	388
Ps000157	Unigene0004651	100	201	0	0	1	201	460	260	1e-110	398
Ps000158	Unigene0007815	99.5	201	1	0	1	201	455	255	8e-110	396
Ps000159	Unigene0049126	98.48	198	3	0	4	201	471	274	3e-103	374
Ps000160	Unigene0007056	99.5	202	0	1	1	201	1578	1779	2e-106	385
Ps000161	Unigene0041883	98.5	200	3	0	2	201	785	984	3e-95	348
Ps000162	Unigene0050308	99	201	2	0	1	201	256	456	5e-109	393
Ps000163	Unigene0007830	99.5	201	1	0	1	201	1210	1410	8e-110	396
Ps000164	Unigene0045064	98.51	201	3	0	1	201	565	365	1e-106	385
Ps000166	Unigene0037368	98.94	188	2	0	14	201	1574	1387	5e-98	357
Ps000167	Unigene0026754	98.01	201	4	0	1	201	871	671	3e-104	377
Ps000168	Unigene0039116	99.49	195	1	0	1	195	1146	1340	1e-106	385
Ps000169	Unigene0058073	98.01	201	4	0	1	201	466	266	2e-107	388
Ps000170	Unigene0052286	100	199	0	0	1	199	134	332	8e-110	396
Ps000171	Unigene0043390	100	201	0	0	1	201	911	1111	1e-110	398
Ps000172	Unigene0009756	99	201	2	0	1	201	778	578	8e-106	383
Ps000173	Unigene0050663	99	201	2	0	1	201	1057	1257	2e-107	388
Ps000174	Unigene0033084	97.77	179	3	1	23	201	410	587	8e-86	316
Ps000175	Unigene0012981	99.09	110	1	0	1	110	296	187	7e-54	210
Ps000177	Unigene0042727	97.01	201	6	0	1	201	942	1142	4e-104	377
Ps000178	Unigene0045499	99	201	2	0	1	201	1082	1282	2e-107	388
Ps000179	Unigene0009172	98.51	201	3	0	1	201	722	522	4e-108	390
Ps000180	Unigene0037603	94.47	199	11	0	1	199	204	6	1e-87	322
Ps000183	Unigene0005715	99.5	201	1	0	1	201	394	194	3e-108	391
Ps000185	Unigene0006011	99	201	2	0	1	201	807	1007	8e-106	383
Ps000186	Unigene0004998	100	201	0	0	1	201	245	445	1e-110	398
Ps000187	Unigene0011490	100	201	0	0	1	201	494	694	1e-110	398
Ps000188	Unigene0071371	99.5	201	1	0	1	201	147	347	3e-108	391
Ps000189	Unigene0047497	98.06	103	2	0	99	201	117	219	2e-47	188
Ps000190	Unigene0004553	99	201	2	0	1	201	844	1044	2e-107	388
Ps000191	Unigene0042933	96.95	164	5	0	1	164	97	260	1e-82	305
Ps000192	Unigene0047905	99.5	201	1	0	1	201	111	311	8e-110	396
Ps000193	Unigene0009648	99	201	2	0	1	201	940	1140	8e-106	383
Ps000195	Unigene0053159	99.49	195	1	0	1	195	195	1	3e-106	384
Ps000196	Unigene0045725	99.33	149	1	0	53	201	1043	895	1e-78	292
Ps000197	Unigene0037245	98.51	201	3	0	1	201	381	181	1e-106	385
Ps000198	Unigene0004153	99.5	201	1	0	1	201	267	67	3e-108	391
Ps000199	Unigene0019828	98.51	201	3	0	1	201	675	475	5e-105	380
Ps000200	Unigene0026528	98.51	201	3	0	1	201	748	548	2e-103	375
Ps000201	Unigene0047012	99	201	2	0	1	201	1042	842	8e-106	383
Ps000202	Unigene0041671	100	201	0	0	1	201	1183	983	1e-110	398
Ps000203	Unigene0033634	88.44	199	23	0	3	201	572	374	6e-56	217
Ps000204	Unigene0004476	97.53	162	4	0	40	201	266	427	3e-79	294
Ps000205	Unigene0044552	98.51	201	3	0	1	201	958	1158	5e-105	380
Ps000206	Unigene0049084	99	201	2	0	1	201	244	44	5e-109	393
Ps000207	Unigene0085982	98.51	201	3	0	1	201	2065	1865	1e-106	385
Ps000209	Unigene0035286	87.76	147	18	0	33	179	147	1	2e-35	149
Ps000210	Unigene0044794	98.51	201	3	0	1	201	60	260	1e-106	385
Ps000211	Unigene0043475	98.01	201	1	3	1	201	942	1139	7e-94	343
Ps000212	Unigene0042330	99	201	2	0	1	201	1782	1582	8e-106	383
Ps000213	Unigene0043750	98.77	162	2	0	2	163	228	67	7e-83	306
Ps000214	Unigene0043081	99	201	2	0	1	201	655	855	5e-109	393
Ps000215	Unigene0051871	98.51	201	3	0	1	201	480	280	4e-108	390
Ps000216	Unigene0047076	98.75	160	2	0	42	201	1	160	2e-81	301
Ps000217	Unigene0050792	99	201	2	0	1	201	845	645	5e-109	393
Ps000219	Unigene0021100	97.49	199	5	0	3	201	237	39	2e-97	355
Ps000220	Unigene0084837	99.5	201	1	0	1	201	2420	2220	8e-110	396
Ps000221	Unigene0004656	100	201	0	0	1	201	1483	1683	5e-98	357
Ps000222	Unigene0045066	98.51	201	3	0	1	201	347	547	1e-106	385
Ps000223	Unigene0047465	99.5	201	1	0	1	201	611	411	3e-108	391
Ps000224	Unigene0012959	99.5	201	1	0	1	201	748	948	3e-108	391
Ps000225	Unigene0043634	98.51	201	3	0	1	201	928	728	5e-105	380
Ps000226	Unigene0047095	97.51	201	5	0	1	201	33	233	9e-102	369
Ps000227	Unigene0016161	89.55	201	21	0	1	201	808	608	3e-66	251
Ps000229	Unigene0041871	100	201	0	0	1	201	983	783	1e-110	398
Ps000231	Unigene0036511	98.51	201	3	0	1	201	477	277	1e-106	385
Ps000232	Unigene0011353	99	201	2	0	1	201	307	507	5e-109	393
Ps000233	Unigene0004740	100	201	0	0	1	201	648	448	1e-110	398
Ps000234	Unigene0006631	100	201	0	0	1	201	506	306	1e-110	398
Ps000235	Unigene0042358	100	161	0	0	41	201	72	232	2e-54	212
Ps000236	Unigene0044550	100	201	0	0	1	201	880	1080	1e-110	398
Ps000237	Unigene0026757	97.51	201	5	0	1	201	3342	3542	6e-105	380
Ps000238	Unigene0004284	99.5	201	1	0	1	201	889	689	3e-108	391
Ps000239	Unigene0046048	100	201	0	0	1	201	848	648	1e-110	398
Ps000240	Unigene0046325	93.07	202	3	3	1	201	876	1067	2e-75	281
Ps000243	Unigene0014566	99.5	201	1	0	1	201	666	466	3e-108	391
Ps000244	Unigene0006038	99	201	2	0	1	201	1508	1308	8e-106	383
Ps000245	Unigene0033992	99.5	201	1	0	1	201	94	294	8e-110	396
Ps000246	Unigene0036081	99.5	201	1	0	1	201	87	287	1e-95	349
Ps000247	Unigene0001882	99	201	2	0	1	201	399	199	2e-107	388
Ps000248	Unigene0003992	98.01	201	4	0	1	201	1363	1563	1e-102	372
Ps000249	Unigene0017706	98.01	201	4	0	1	201	1060	860	1e-102	372
Ps000251	Unigene0042882	98.51	201	3	0	1	201	719	519	1e-106	385
Ps000252	Unigene0042876	99.5	201	1	0	1	201	831	631	3e-108	391
Ps000253	Unigene0046100	100	201	0	0	1	201	931	1131	1e-110	398
Ps000254	Unigene0019206	93.69	111	7	0	91	201	1613	1503	3e-40	165
Ps000255	Unigene0061007	85.32	109	16	0	84	192	204	312	2e-17	89.7
Ps000256	Unigene0003770	99	201	2	0	1	201	585	785	5e-109	393
Ps000257	Unigene0053446	98.44	128	2	0	1	128	311	438	1e-63	243
Ps000258	Unigene0044125	98.51	201	3	0	1	201	1457	1257	4e-108	390
Ps000259	Unigene0043494	99.5	201	1	0	1	201	816	1016	3e-108	391
Ps000260	Unigene0044383	98.51	202	2	1	1	202	84	284	3e-103	374
Ps000261	Unigene0036376	87.4	127	16	0	15	141	83	209	2e-28	125
Ps000262	Unigene0042710	98.51	201	3	0	1	201	638	838	2e-103	375
Ps000263	Unigene0058116	99	201	2	0	1	201	167	367	2e-107	388
Ps000264	Unigene0012939	99	201	2	0	1	201	1127	927	2e-107	388
Ps000265	Unigene0042209	99.02	102	1	0	100	201	177	278	1e-50	199
Ps000266	Unigene0042707	99	201	2	0	1	201	708	908	8e-106	383
Ps000267	Unigene0013870	98.01	201	4	0	1	201	702	502	9e-106	382
Ps000268	Unigene0012648	99	201	2	0	1	201	1356	1556	2e-107	388
Ps000269	Unigene0044306	99.35	155	1	0	1	155	158	4	9e-81	299
Ps000270	Unigene0039944	99	201	2	0	1	201	803	603	2e-107	388
Ps000271	Unigene0049855	100	201	0	0	1	201	1230	1430	1e-110	398
Ps000272	Unigene0044575	99	201	0	2	1	201	473	275	5e-101	367
Ps000273	Unigene0011263	100	191	0	0	1	191	2021	1831	1e-104	379
Ps000274	Unigene0005065	97.51	201	5	0	1	201	910	1110	9e-102	369
Ps000275	Unigene0012232	98.51	202	2	1	1	201	443	242	3e-103	374
Ps000276	Unigene0042334	99	201	2	0	1	201	609	409	8e-106	383
Ps000277	Unigene0043759	99.5	201	1	0	1	201	1033	1233	3e-108	391
Ps000278	Unigene0047552	99.18	122	1	0	1	122	330	209	2e-61	235
Ps000279	Unigene0026380	98.01	201	4	0	1	201	229	29	5e-101	367
Ps000280	Unigene0044252	99	201	2	0	1	201	2513	2313	5e-109	393
Ps000281	Unigene0042299	100	201	0	0	1	201	539	739	1e-110	398
Ps000282	Unigene0015007	99	201	2	0	1	201	2328	2128	2e-107	388
Ps000283	Unigene0087031	99.5	201	1	0	1	201	1442	1242	3e-108	391
Ps000284	Unigene0045815	98.51	201	3	0	1	201	729	529	4e-108	390
Ps000285	Unigene0022581	98.97	195	2	0	7	201	1	195	8e-104	376
Ps000286	Unigene0084900	99.5	201	1	0	1	201	234	34	3e-108	391
Ps000287	Unigene0042458	99	201	2	0	1	201	291	91	5e-109	393
Ps000288	Unigene0045147	100	201	0	0	1	201	802	1002	1e-110	398
Ps000289	Unigene0041938	99.5	199	1	0	1	199	1370	1568	5e-109	393
Ps000290	Unigene0000784	98.51	201	3	0	1	201	315	515	4e-108	390
Ps000292	Unigene0042623	99.5	201	1	0	1	201	863	663	8e-110	396
Ps000293	Unigene0043018	99.5	201	1	0	1	201	711	911	8e-110	396
Ps000294	Unigene0033329	100	192	0	0	10	201	908	717	3e-105	381
Ps000295	Unigene0043051	99.5	201	1	0	1	201	1312	1112	8e-110	396
Ps000296	Unigene0015905	99	201	2	0	1	201	770	970	5e-109	393
Ps000297	Unigene0033460	99.5	201	1	0	1	201	290	490	3e-108	391
Ps000298	Unigene0085608	98.51	201	3	0	1	201	426	226	5e-105	380
Ps000299	Unigene0039722	99.5	201	1	0	1	201	541	341	3e-108	391
Ps000300	Unigene0042066	100	201	0	0	1	201	416	216	5e-98	357
Ps000301	Unigene0006208	99.5	201	1	0	1	201	544	344	8e-110	396
Ps000302	Unigene0008001	100	182	0	0	20	201	2951	2770	3e-99	361
Ps000303	Unigene0035902	98.51	201	2	1	1	201	164	363	1e-102	372
Ps000304	Unigene0016161	99.5	201	1	0	1	201	766	566	8e-110	396
Ps000305	Unigene0043407	99	201	2	0	1	201	482	682	5e-109	393
Ps000306	Unigene0050589	98.01	201	4	0	1	201	274	74	9e-106	382
Ps000308	Unigene0041486	100	199	0	0	3	201	514	316	8e-110	396
Ps000309	Unigene0084873	99.5	201	1	0	1	201	1099	1299	8e-110	396
Ps000310	Unigene0011532	98.01	201	4	0	1	201	443	243	5e-101	367
Ps000311	Unigene0043303	97.52	202	4	1	1	201	1152	951	6e-89	326
Ps000312	Unigene0044652	98.53	204	0	1	1	201	263	60	5e-104	377
Ps000313	Unigene0045128	99.5	201	1	0	1	201	286	86	3e-108	391
Ps000314	Unigene0042109	100	201	0	0	1	201	774	574	1e-110	398
Ps000315	Unigene0042216	100	201	0	0	1	201	371	171	1e-110	398
Ps000316	Unigene0047728	99	201	2	0	1	201	414	614	5e-109	393
Ps000317	Unigene0049208	98.75	160	2	0	42	201	1	160	2e-84	312
Ps000318	Unigene0045057	99	201	2	0	1	201	671	871	3e-106	384
Ps000320	Unigene0004161	99	201	2	0	1	201	13	213	2e-107	388
Ps000321	Unigene0003575	100	201	0	0	1	201	408	208	1e-110	398
Ps000322	Unigene0019055	100	201	0	0	1	201	582	382	1e-110	398
Ps000323	Unigene0045590	97.51	201	4	1	1	201	1330	1131	6e-101	366
Ps000324	Unigene0003176	98.51	201	2	1	1	201	406	605	1e-102	372
Ps000325	Unigene0020448	100	197	0	0	3	199	204	400	1e-94	345
Ps000326	Unigene0042939	100	201	0	0	1	201	88	288	1e-110	398
Ps000327	Unigene0007904	99	201	1	1	1	201	574	375	5e-105	380
Ps000328	Unigene0042344	98.51	201	2	1	1	201	1087	1286	3e-104	377
Ps000329	Unigene0002995	98.01	201	4	0	1	201	527	327	9e-106	382
Ps000330	Unigene0003433	99	201	2	0	1	201	421	221	8e-106	383
Ps000331	Unigene0004679	99.5	201	1	0	1	201	292	492	3e-108	391
Ps000332	Unigene0044733	98.51	201	3	0	1	201	859	1059	4e-108	390
Ps000333	Unigene0041571	99.5	201	1	0	1	201	1947	2147	3e-108	391
Ps000334	Unigene0038166	100	116	0	0	86	201	949	834	7e-60	230
Ps000335	Unigene0045020	97.51	201	5	0	1	201	87	287	3e-100	364
Ps000336	Unigene0041788	98.51	201	3	0	1	201	635	435	1e-106	385
Ps000337	Unigene0021243	98.51	201	3	0	1	201	175	375	4e-108	390
Ps000338	Unigene0045017	99	201	2	0	1	201	1234	1434	5e-109	393
Ps000339	Unigene0049641	99	201	2	0	1	201	819	619	8e-106	383
Ps000340	Unigene0084837	99.5	201	1	0	1	201	214	14	8e-110	396
Ps000341	Unigene0018127	99.5	201	1	0	1	201	1535	1335	8e-110	396
Ps000342	Unigene0037220	87.76	196	24	0	6	201	100	295	9e-38	157
Ps000343	Unigene0004181	99	201	2	0	1	201	645	445	8e-106	383
Ps000345	Unigene0050663	99	201	2	0	1	201	983	783	5e-109	393
Ps000346	Unigene0044950	99.5	201	1	0	1	201	298	98	3e-108	391
Ps000347	Unigene0009346	99.44	179	1	0	23	201	1194	1016	1e-82	305
Ps000348	Unigene0005431	96.95	197	3	2	1	194	383	187	3e-91	334
Ps000349	Unigene0042399	99.5	201	1	0	1	201	1756	1556	3e-108	391
Ps000350	Unigene0003436	100	100	0	0	102	201	40	139	3e-50	198
Ps000351	Unigene0033444	97.87	141	3	0	60	200	571	431	1e-67	256
Ps000352	Unigene0047103	100	201	0	0	1	201	164	364	1e-110	398
Ps000353	Unigene0041461	99.31	144	1	0	1	144	1050	1193	3e-74	278
Ps000354	Unigene0047461	99.5	201	1	0	1	201	642	442	8e-110	396
Ps000355	Unigene0027276	99.44	178	1	0	24	201	57	234	2e-94	345
Ps000356	Unigene0027280	98.01	201	4	0	1	201	352	552	2e-107	388
Ps000357	Unigene0037371	100	201	0	0	1	201	738	538	1e-110	398
Ps000358	Unigene0044167	99.5	201	1	0	1	201	1449	1649	8e-110	396
Ps000359	Unigene0005103	99	201	2	0	1	201	1205	1405	2e-107	388
Ps000360	Unigene0026858	100	201	0	0	1	201	698	898	1e-110	398
Ps000361	Unigene0002663	99.5	201	1	0	1	201	539	339	3e-108	391
Ps000362	Unigene0009933	98.51	201	3	0	1	201	213	413	5e-105	380
Ps000363	Unigene0003913	99.5	201	1	0	1	201	1507	1307	3e-108	391
Ps000364	Unigene0027039	98.51	201	3	0	1	201	1906	1706	2e-103	375
Ps000365	Unigene0034637	98.01	201	4	0	1	201	477	277	4e-93	340
Ps000366	Unigene0009735	98.51	201	3	0	1	201	248	48	5e-94	343
Ps000367	Unigene0006201	99.06	106	1	0	1	106	195	90	2e-51	202
Ps000368	Unigene0008117	99	201	2	0	1	201	893	693	2e-107	388
Ps000370	Unigene0084615	97.28	184	5	0	18	201	1261	1078	1e-94	346
Ps000371	Unigene0042138	100	146	0	0	1	146	167	22	9e-78	289
Ps000372	Unigene0009728	95.52	201	3	1	1	201	2510	2316	1e-89	329
Ps000373	Unigene0086734	99.5	201	1	0	1	201	963	1163	8e-110	396
Ps000375	Unigene0044128	100	191	0	0	1	191	1295	1485	1e-104	379
Ps000376	Unigene0043060	98.77	163	2	0	39	201	219	57	3e-86	318
Ps000377	Unigene0008879	99.25	134	1	0	1	134	1325	1458	3e-68	258
Ps000378	Unigene0018667	98.51	201	3	0	1	201	2114	1914	4e-108	390
Ps000379	Unigene0044331	99	201	2	0	1	201	266	466	2e-107	388
Ps000380	Unigene0011730	98.48	198	3	0	4	201	252	55	3e-103	374
Ps000381	Unigene0035436	99.5	201	1	0	1	201	2204	2404	8e-110	396
Ps000382	Unigene0045487	99.5	201	1	0	1	201	911	1111	3e-108	391
Ps000383	Unigene0018384	99.19	123	1	0	1	123	359	237	1e-62	239
Ps000384	Unigene0042343	98.51	201	3	0	1	201	95	295	5e-105	380
Ps000385	Unigene0005635	100	201	0	0	1	201	1564	1764	1e-110	398
Ps000386	Unigene0054045	100	201	0	0	1	201	429	629	1e-110	398
Ps000387	Unigene0043398	98.01	201	4	0	1	201	344	544	9e-106	382
Ps000388	Unigene0042722	100	100	0	0	102	201	904	805	3e-50	198
Ps000389	Unigene0047529	98.3	176	3	0	1	176	185	10	4e-93	340
Ps000390	Unigene0009943	99.5	201	1	0	1	201	571	371	3e-108	391
Ps000391	Unigene0045362	98.51	201	3	0	1	201	761	561	1e-106	385
Ps000392	Unigene0046161	97.01	201	5	1	1	201	190	389	1e-101	369
Ps000393	Unigene0010223	99.31	144	1	0	58	201	176	319	3e-74	278
Ps000394	Unigene0048758	97.49	199	5	0	1	199	141	339	4e-104	377
Ps000395	Unigene0019562	87.13	101	13	0	99	199	186	286	2e-21	102
Ps000396	Unigene0006116	98.58	141	2	0	1	141	1048	1188	3e-73	274
Ps000397	Unigene0083846	99	201	2	0	1	201	1690	1890	3e-106	384
Ps000398	Unigene0004645	98.51	201	3	0	1	201	1796	1996	4e-108	390
Ps000399	Unigene0030921	99	201	2	0	1	201	521	721	8e-106	383
Ps000400	Unigene0086961	98.51	201	3	0	1	201	1540	1340	5e-105	380
Ps000401	Unigene0025160	99	201	2	0	1	201	1117	1317	2e-107	388
Ps000402	Unigene0082424	98.51	201	3	0	1	201	1663	1463	1e-106	385
Ps000403	Unigene0042258	94.17	103	6	0	87	189	181	283	9e-38	157
Ps000404	Unigene0014764	99	201	2	0	1	201	662	462	5e-109	393
Ps000405	Unigene0025244	98.01	201	4	0	1	201	1039	1239	9e-106	382
Ps000406	Unigene0046891	94.53	201	5	1	1	201	55	249	6e-65	247
Ps000407	Unigene0050118	100	174	0	0	1	174	174	1	2e-94	345
Ps000408	Unigene0004360	99	201	2	0	1	201	790	590	2e-107	388
Ps000409	Unigene0046042	99	201	2	0	1	201	818	618	8e-106	383
Ps000410	Unigene0003940	99.5	201	1	0	1	201	475	275	8e-110	396
Ps000411	Unigene0048382	98.51	201	3	0	1	201	920	720	4e-108	390
Ps000412	Unigene0066878	98.88	179	2	0	19	197	413	235	3e-94	344
Ps000413	Unigene0008696	99	201	2	0	1	201	487	687	2e-107	388
Ps000414	Unigene0004205	99	201	2	0	1	201	660	460	5e-109	393
Ps000415	Unigene0045153	99.5	201	1	0	1	201	233	433	8e-110	396
Ps000416	Unigene0002515	98.01	201	4	0	1	201	339	139	9e-106	382
Ps000417	Unigene0002857	96.52	201	7	0	1	201	433	633	4e-100	364
Ps000418	Unigene0081861	100	201	0	0	1	201	253	453	1e-110	398
Ps000419	Unigene0081594	99	201	1	1	1	201	1772	1573	5e-105	380
Ps000420	Unigene0055709	98.08	156	3	0	1	156	156	1	2e-78	291
Ps000421	Unigene0048436	99.42	172	1	0	30	201	1	172	9e-93	339
Ps000422	Unigene0048616	98.51	201	3	0	1	201	1102	1302	1e-106	385
Ps000423	Unigene0041805	100	108	0	0	94	201	1034	927	4e-55	214
Ps000424	Unigene0041360	100	201	0	0	1	201	1269	1069	1e-110	398
Ps000425	Unigene0041856	99.5	201	1	0	1	201	534	734	3e-108	391
Ps000426	Unigene0008913	99.5	201	1	0	1	201	2107	2307	3e-108	391
Ps000427	Unigene0042002	99	201	2	0	1	201	788	988	5e-109	393
Ps000428	Unigene0013971	99.5	201	1	0	1	201	423	623	8e-110	396
Ps000429	Unigene0033031	99.5	201	1	0	1	201	2449	2249	8e-110	396
Ps000430	Unigene0005004	99.5	201	1	0	1	201	562	362	3e-108	391
Ps000431	Unigene0042753	99.5	201	1	0	1	201	1095	1295	3e-108	391
Ps000432	Unigene0041730	100	201	0	0	1	201	912	712	1e-110	398
Ps000433	Unigene0041653	99.5	201	1	0	1	201	1187	1387	3e-108	391
Ps000434	Unigene0047343	99.5	201	1	0	1	201	451	251	3e-108	391
Ps000435	Unigene0045584	98.01	201	4	0	1	201	1728	1528	9e-106	382
Ps000436	Unigene0027878	95.85	193	8	0	1	193	852	1044	8e-93	339
Ps000437	Unigene0006180	99.5	201	1	0	1	201	509	709	3e-108	391
Ps000438	Unigene0019007	96.02	201	8	0	1	201	1043	1243	1e-98	359
Ps000439	Unigene0044965	99	201	2	0	1	201	335	135	8e-106	383
Ps000440	Unigene0038329	100	100	0	0	102	201	147	246	3e-50	198
Ps000441	Unigene0042831	100	201	0	0	1	201	936	1136	1e-110	398
Ps000442	Unigene0045322	99.5	201	1	0	1	201	949	749	8e-110	396
Ps000443	Unigene0046655	99	201	2	0	1	201	89	289	2e-107	388
Ps000444	Unigene0004582	98.5	200	3	0	1	200	1502	1303	2e-104	378
Ps000445	Unigene0042092	99	100	1	0	102	201	255	354	1e-49	196
Ps000446	Unigene0007381	99.33	150	1	0	1	150	150	1	3e-79	294
Ps000447	Unigene0054611	99	201	2	0	1	201	453	253	8e-106	383
Ps000448	Unigene0006858	99	201	2	0	1	201	560	760	2e-107	388
Ps000449	Unigene0041231	99	201	2	0	1	201	222	422	2e-107	388
Ps000450	Unigene0043573	99	201	2	0	1	201	1500	1300	2e-107	388
Ps000451	Unigene0034082	99.22	129	1	0	1	129	760	888	9e-67	253
Ps000452	Unigene0047900	99	201	2	0	1	201	589	789	2e-107	388
Ps000453	Unigene0042398	99.5	201	1	0	1	201	765	965	3e-108	391
Ps000454	Unigene0011498	100	201	0	0	1	201	1307	1507	1e-110	398
Ps000455	Unigene0009065	98.01	201	4	0	1	201	219	19	3e-104	377
Ps000456	Unigene0042087	99.5	201	1	0	1	201	792	592	8e-110	396
Ps000457	Unigene0042678	99.5	201	1	0	1	201	720	920	3e-108	391
Ps000458	Unigene0044499	99.47	190	1	0	1	190	810	999	1e-101	369
Ps000459	Unigene0004173	99.5	201	1	0	1	201	1284	1084	8e-110	396
Ps000460	Unigene0020890	98.51	201	3	0	1	201	554	354	5e-105	380
Ps000461	Unigene0041911	99.5	201	1	0	1	201	241	441	3e-108	391
Ps000462	Unigene0004932	100	201	0	0	1	201	272	472	1e-110	398
Ps000463	Unigene0044341	97.52	202	4	1	1	201	615	414	2e-101	368
Ps000464	Unigene0044937	99	201	2	0	1	201	399	599	8e-106	383
Ps000465	Unigene0028624	98.01	201	4	0	1	201	574	374	2e-107	388
Ps000466	Unigene0043152	96.52	201	7	0	1	201	1613	1413	6e-97	353
Ps000467	Unigene0034286	98.51	201	3	0	1	201	322	522	2e-103	375
Ps000468	Unigene0045583	99.46	186	1	0	1	186	939	1124	8e-101	366
Ps000469	Unigene0041415	99.5	201	1	0	1	201	447	647	3e-108	391
Ps000470	Unigene0041240	99	201	2	0	1	201	928	728	2e-107	388
Ps000471	Unigene0005318	96.52	201	4	1	1	201	293	490	1e-92	339
Ps000472	Unigene0017839	99.5	201	1	0	1	201	959	759	3e-108	391
Ps000473	Unigene0044127	99.5	201	1	0	1	201	1264	1464	3e-108	391
Ps000474	Unigene0022150	99.5	201	1	0	1	201	833	633	3e-108	391
Ps000475	Unigene0050322	99	201	2	0	1	201	380	180	2e-107	388
Ps000476	Unigene0014743	99.5	201	1	0	1	201	558	358	3e-97	354
Ps000477	Unigene0084241	100	201	0	0	1	201	1065	1265	1e-110	398
Ps000478	Unigene0043273	99.48	194	1	0	1	194	2278	2471	5e-104	377
Ps000479	Unigene0011467	99	201	2	0	1	201	1018	818	8e-95	346
Ps000480	Unigene0004605	100	201	0	0	1	201	916	1116	1e-110	398
Ps000481	Unigene0009822	99	201	2	0	1	201	1002	1202	2e-107	388
Ps000482	Unigene0040796	99.5	201	1	0	1	201	121	321	8e-110	396
Ps000483	Unigene0008267	98.51	201	3	0	1	201	1218	1418	2e-103	375
Ps000484	Unigene0043037	99	201	2	0	1	201	879	1079	8e-106	383
Ps000485	Unigene0013957	99.01	202	1	1	1	201	643	442	5e-104	377
Ps000486	Unigene0005681	99	201	2	0	1	201	2356	2156	2e-107	388
Ps000487	Unigene0045214	99.5	201	1	0	1	201	1030	830	8e-110	396
Ps000488	Unigene0007408	100	201	0	0	1	201	452	252	1e-110	398
Ps000489	Unigene0043994	99	201	1	1	1	201	127	326	5e-105	380
Ps000490	Unigene0046538	97.26	146	3	1	56	201	1	145	3e-67	255
Ps000491	Unigene0083953	100	185	0	0	1	185	1345	1529	5e-101	367
Ps000492	Unigene0048664	98.51	201	3	0	1	201	311	111	1e-106	385
Ps000493	Unigene0042042	99	201	1	1	1	201	1025	1224	2e-103	375
Ps000494	Unigene0006403	100	201	0	0	1	201	827	627	1e-110	398
Ps000496	Unigene0086315	99.5	201	1	0	1	201	245	445	3e-108	391
Ps000497	Unigene0005092	100	201	0	0	1	201	293	493	1e-110	398
Ps000498	Unigene0006421	99.29	140	1	0	62	201	948	1087	8e-72	270
Ps000499	Unigene0008039	99.5	201	1	0	1	201	1645	1445	3e-108	391
Ps000500	Unigene0023999	100	201	0	0	1	201	502	702	1e-110	398
Ps000501	Unigene0044642	99.5	201	1	0	1	201	590	790	3e-108	391
Ps000502	Unigene0084467	96.53	202	5	2	1	201	350	550	5e-73	274
Ps000503	Unigene0019939	99.5	201	1	0	1	201	1349	1549	8e-110	396
Ps000504	Unigene0021165	100	101	0	0	101	201	55	155	6e-51	200
Ps000505	Unigene0018444	100	201	0	0	1	201	1195	995	1e-110	398
Ps000506	Unigene0049088	99	201	2	0	1	201	1507	1307	8e-106	383
Ps000507	Unigene0026689	99.5	201	1	0	1	201	124	324	3e-108	391
Ps000508	Unigene0049391	99	201	2	0	1	201	198	398	2e-107	388
Ps000509	Unigene0039427	100	201	0	0	1	201	1743	1943	1e-110	398
Ps000510	Unigene0013343	99	201	2	0	1	201	77	277	8e-106	383
Ps000511	Unigene0048408	99.5	201	1	0	1	201	517	317	8e-110	396
Ps000512	Unigene0042437	98.51	201	3	0	1	201	905	705	2e-103	375
Ps000513	Unigene0084925	100	201	0	0	1	201	657	457	1e-110	398
Ps000514	Unigene0037212	98.4	188	3	0	1	188	189	2	9e-99	359
Ps000515	Unigene0020343	99	201	2	0	1	201	864	1064	2e-107	388
Ps000516	Unigene0042898	99.49	195	1	0	7	201	85	279	1e-104	379
Ps000517	Unigene0084639	95.15	206	5	1	1	201	586	791	7e-77	286
Ps000518	Unigene0042523	99.5	201	1	0	1	201	18	218	8e-110	396
Ps000519	Unigene0009080	99.5	201	1	0	1	201	1417	1217	8e-110	396
Ps000520	Unigene0044880	100	201	0	0	1	201	1293	1093	1e-110	398
Ps000521	Unigene0041402	99.5	201	1	0	1	201	361	561	3e-108	391
Ps000522	Unigene0050023	100	199	0	0	1	199	369	171	2e-109	394
Ps000523	Unigene0012379	99	201	2	0	1	201	488	288	2e-107	388
Ps000524	Unigene0086779	98.01	201	2	2	1	201	108	306	2e-99	361
Ps000525	Unigene0042480	98.51	201	3	0	1	201	1486	1286	1e-106	385
Ps000526	Unigene0050726	98.51	201	3	0	1	201	619	819	1e-106	385
Ps000527	Unigene0086124	94.37	213	0	1	1	201	2529	2741	3e-93	341
Ps000528	Unigene0002962	100	201	0	0	1	201	1150	950	1e-110	398
Ps000529	Unigene0040427	95.17	145	7	0	57	201	38	182	6e-62	237
Ps000530	Unigene0008904	98	150	2	1	1	150	2058	2206	1e-70	266
Ps000531	Unigene0046954	98.01	201	4	0	1	201	316	516	9e-106	382
Ps000532	Unigene0003757	99	201	2	0	1	201	77	277	5e-109	393
Ps000533	Unigene0050483	96.69	121	4	0	81	201	1060	940	3e-53	208
Ps000534	Unigene0043613	99	201	2	0	1	201	119	319	5e-109	393
Ps000535	Unigene0005066	99	201	2	0	1	201	1000	1200	2e-107	388
Ps000536	Unigene0003948	99.5	201	1	0	1	201	3775	3975	8e-110	396
Ps000537	Unigene0035185	98.01	201	4	0	1	201	1363	1163	5e-101	367
Ps000538	Unigene0040465	99.5	201	1	0	1	201	170	370	8e-110	396
Ps000539	Unigene0003909	100	201	0	0	1	201	211	411	1e-110	398
Ps000540	Unigene0034667	99.5	201	1	0	1	201	167	367	3e-108	391
Ps000541	Unigene0010634	98.99	199	2	0	1	199	180	378	1e-106	385
Ps000542	Unigene0046059	100	201	0	0	1	201	559	359	1e-110	398
Ps000543	Unigene0042561	99.5	201	1	0	1	201	1050	850	8e-110	396
Ps000544	Unigene0009958	99.5	201	1	0	1	201	246	446	3e-108	391
Ps000545	Unigene0054740	98.4	188	3	0	1	188	188	1	9e-99	359
Ps000546	Unigene0012272	98.51	201	3	0	1	201	449	649	1e-106	385
Ps000547	Unigene0010483	99.5	201	1	0	1	201	334	534	3e-108	391
Ps000548	Unigene0042570	99.5	201	1	0	1	201	1001	1201	3e-108	391
Ps000549	Unigene0042842	98.01	201	4	0	1	201	677	477	3e-104	377
Ps000550	Unigene0009329	100	201	0	0	1	201	199	399	1e-110	398
Ps000551	Unigene0048287	100	109	0	0	93	201	251	143	1e-55	216
Ps000552	Unigene0010030	100	201	0	0	1	201	645	845	1e-110	398
Ps000553	Unigene0006057	99	201	2	0	1	201	848	648	2e-107	388
Ps000554	Unigene0014075	97.01	201	6	0	1	201	311	511	4e-104	377
Ps000555	Unigene0042470	99	201	2	0	1	201	1168	968	2e-107	388
Ps000556	Unigene0018420	99.5	201	1	0	1	201	1494	1294	3e-108	391
Ps000557	Unigene0046692	100	201	0	0	1	201	855	1055	1e-110	398
Ps000558	Unigene0042925	98.51	201	3	0	1	201	950	1150	4e-108	390
Ps000559	Unigene0055618	100	201	0	0	1	201	920	720	1e-110	398
Ps000560	Unigene0005260	99.5	201	1	0	1	201	1178	978	3e-108	391
Ps000561	Unigene0015988	99	201	2	0	1	201	1052	852	8e-106	383
Ps000562	Unigene0033174	100	133	0	0	69	201	1	133	5e-70	264
Ps000563	Unigene0010355	99.5	201	1	0	1	201	1974	2174	7e-94	343
Ps000564	Unigene0041859	98.51	201	3	0	1	201	69	269	5e-105	380
Ps000565	Unigene0030217	92.63	190	14	0	12	201	222	33	1e-70	266
Ps000566	Unigene0041824	100	201	0	0	1	201	549	749	1e-110	398
Ps000567	Unigene0085092	98.51	201	3	0	1	201	259	59	1e-106	385
Ps000568	Unigene0006223	99.5	201	1	0	1	201	567	767	8e-110	396
Ps000569	Unigene0052073	96	125	5	0	77	201	1	125	3e-59	228
Ps000570	Unigene0042538	100	134	0	0	68	201	381	514	1e-70	266
Ps000572	Unigene0041264	99.5	201	1	0	1	201	688	488	3e-108	391
Ps000573	Unigene0019706	100	201	0	0	1	201	165	365	1e-110	398
Ps000574	Unigene0025859	99.5	201	1	0	1	201	297	97	3e-108	391
Ps000575	Unigene0044009	100	201	0	0	1	201	241	41	1e-110	398
Ps000576	Unigene0042800	99	201	2	0	1	201	1156	956	8e-106	383
Ps000577	Unigene0006040	98.17	109	1	1	29	136	84	192	5e-36	151
Ps000578	Unigene0004931	99.49	196	1	0	6	201	76	271	8e-107	386
Ps000579	Unigene0017137	86.07	122	17	0	15	136	360	239	2e-25	116
Ps000580	Unigene0083022	99.5	201	1	0	1	201	860	1060	8e-110	396
Ps000581	Unigene0010289	99.5	201	1	0	1	201	861	1061	3e-108	391
Ps000582	Unigene0005627	98.51	201	3	0	1	201	1296	1096	1e-106	385
Ps000583	Unigene0007142	98.01	201	4	0	1	201	183	383	2e-107	388
Ps000585	Unigene0013249	99	201	2	0	1	201	634	434	8e-106	383
Ps000586	Unigene0043843	100	201	0	0	1	201	289	489	1e-110	398
Ps000587	Unigene0007384	99.5	201	1	0	1	201	3548	3348	3e-108	391
Ps000588	Unigene0008974	100	201	0	0	1	201	819	1019	1e-110	398
Ps000589	Unigene0009556	96.52	201	7	0	1	201	1251	1051	2e-95	348
Ps000590	Unigene0041744	99.01	202	1	1	1	202	1596	1396	1e-105	382
Ps000591	Unigene0045187	99	201	2	0	1	201	603	803	2e-107	388
Ps000593	Unigene0008414	99.5	201	1	0	1	201	446	246	3e-108	391
Ps000594	Unigene0004490	99	201	2	0	1	201	1261	1461	5e-109	393
Ps000595	Unigene0037261	87.91	182	22	0	9	190	2	183	4e-47	188
Ps000596	Unigene0046133	98.51	201	2	1	1	201	111	310	3e-104	377
Ps000597	Unigene0040466	100	201	0	0	1	201	565	365	1e-110	398
Ps000599	Unigene0037352	96.48	199	7	0	3	201	2	200	3e-94	344
Ps000600	Unigene0020321	100	201	0	0	1	201	286	486	1e-110	398
Ps000601	Unigene0046672	100	201	0	0	1	201	621	421	1e-110	398
Ps000603	Unigene0043510	99	201	2	0	1	201	668	468	2e-107	388
Ps000604	Unigene0010921	100	201	0	0	1	201	1213	1413	1e-110	398
Ps000605	Unigene0045389	99	201	2	0	1	201	894	1094	2e-107	388
Ps000606	Unigene0084925	98.5	200	2	1	1	200	727	925	2e-102	371
Ps000607	Unigene0042244	99.5	201	1	0	1	201	160	360	8e-110	396
Ps000608	Unigene0042739	99.5	201	1	0	1	201	545	345	3e-108	391
Ps000609	Unigene0041727	99	201	2	0	1	201	367	567	2e-107	388
Ps000610	Unigene0004196	100	201	0	0	1	201	2711	2911	1e-110	398
Ps000611	Unigene0004051	98.01	201	4	0	1	201	1021	821	3e-104	377
Ps000612	Unigene0042635	98.01	201	4	0	1	201	1071	1271	5e-101	367
Ps000613	Unigene0085809	99.5	199	1	0	1	199	1575	1377	5e-109	393
Ps000614	Unigene0003169	99.5	201	1	0	1	201	548	348	3e-108	391
Ps000615	Unigene0007240	97.16	141	4	0	1	141	141	1	9e-67	253
Ps000616	Unigene0014397	97.34	188	3	2	15	201	2312	2126	4e-86	317
Ps000617	Unigene0041629	98.94	188	2	0	1	188	1109	1296	2e-85	315
Ps000618	Unigene0041833	99.5	201	1	0	1	201	295	495	3e-108	391
Ps000619	Unigene0044529	97.01	201	6	0	1	201	469	269	8e-98	356
Ps000620	Unigene0019402	99	201	2	0	1	201	1840	2040	2e-107	388
Ps000621	Unigene0042136	100	201	0	0	1	201	140	340	1e-110	398
Ps000622	Unigene0005412	98.51	201	3	0	1	201	402	202	1e-106	385
Ps000623	Unigene0013946	98.5	200	2	1	1	200	819	621	2e-102	371
Ps000624	Unigene0041906	100	201	0	0	1	201	246	446	1e-110	398
Ps000625	Unigene0045561	100	100	0	0	102	201	1233	1134	3e-50	198
Ps000626	Unigene0045930	99.5	201	1	0	1	201	761	961	3e-108	391
Ps000627	Unigene0041754	100	132	0	0	1	132	343	212	2e-69	262
Ps000628	Unigene0004041	98.51	201	3	0	1	201	1368	1568	4e-108	390
Ps000629	Unigene0040184	99.5	201	1	0	1	201	611	411	3e-108	391
Ps000630	Unigene0012282	100	201	0	0	1	201	1163	963	1e-110	398
Ps000631	Unigene0042086	100	201	0	0	1	201	326	126	1e-110	398
Ps000632	Unigene0044900	100	150	0	0	1	150	984	1133	2e-80	299
Ps000633	Unigene0044555	99	201	2	0	1	201	797	597	2e-107	388
Ps000634	Unigene0043417	98.51	201	3	0	1	201	453	253	1e-106	385
Ps000635	Unigene0049520	99	201	2	0	1	201	296	496	2e-107	388
Ps000636	Unigene0035817	99.5	201	0	1	1	201	824	1023	8e-106	383
Ps000637	Unigene0049890	97.74	177	4	0	1	177	177	1	3e-91	334
Ps000638	Unigene0045598	99.5	201	1	0	1	201	246	46	3e-108	391
Ps000639	Unigene0004900	98.88	178	2	0	8	185	250	73	4e-92	337
Ps000640	Unigene0037532	99	201	2	0	1	201	181	381	8e-106	383
Ps000641	Unigene0003804	99	201	2	0	1	201	403	203	8e-106	383
Ps000643	Unigene0084504	99	201	2	0	1	201	620	420	8e-106	383
Ps000644	Unigene0047895	99.5	201	1	0	1	201	274	474	3e-108	391
Ps000645	Unigene0042944	100	201	0	0	1	201	887	1087	1e-110	398
Ps000646	Unigene0041937	98.42	190	3	0	1	190	233	44	5e-100	363
Ps000647	Unigene0007259	98.51	201	3	0	1	201	504	304	1e-106	385
Ps000648	Unigene0052708	99.5	201	1	0	1	201	1231	1031	8e-110	396
Ps000649	Unigene0009556	94.24	191	11	0	1	191	1281	1471	2e-81	301
Ps000650	Unigene0042268	95.52	201	9	0	1	201	569	769	3e-103	374
Ps000651	Unigene0003833	97.45	196	2	2	6	201	249	441	2e-91	335
Ps000652	Unigene0009966	99	201	2	0	1	201	544	344	5e-109	393
Ps000653	Unigene0020216	97.51	201	5	0	1	201	172	372	6e-105	380
Ps000654	Unigene0003822	99.5	201	1	0	1	201	857	1057	3e-108	391
Ps000655	Unigene0081386	100	201	0	0	1	201	368	168	1e-110	398
Ps000656	Unigene0023779	99.5	201	1	0	1	201	2922	3122	3e-108	391
Ps000657	Unigene0004875	99	201	2	0	1	201	66	266	5e-109	393
Ps000658	Unigene0042168	98.99	199	1	1	4	201	1492	1294	3e-102	371
Ps000659	Unigene0041236	100	201	0	0	1	201	530	330	1e-110	398
Ps000660	Unigene0050686	99.32	147	1	0	55	201	1	147	2e-77	288
Ps000661	Unigene0043782	99	201	2	0	1	201	601	801	2e-107	388
Ps000662	Unigene0005683	97.51	201	5	0	1	201	124	324	6e-105	380
Ps000663	Unigene0046328	99.25	134	1	0	1	134	284	151	3e-68	258
Ps000664	Unigene0012110	99.5	201	1	0	1	201	432	232	3e-108	391
Ps000665	Unigene0043502	99	201	2	0	1	201	822	622	5e-109	393
Ps000666	Unigene0047545	97.51	201	5	0	1	201	834	1034	3e-100	364
Ps000667	Unigene0013749	99.5	200	1	0	2	201	75	274	5e-108	390
Ps000669	Unigene0042145	99.5	201	1	0	1	201	392	192	8e-110	396
Ps000670	Unigene0043381	99.5	199	1	0	3	201	1899	1701	2e-107	388
Ps000671	Unigene0038185	83.08	201	34	0	1	201	280	80	3e-43	175
Ps000672	Unigene0038966	99	201	2	0	1	201	190	390	5e-109	393
Ps000673	Unigene0044789	99.5	201	1	0	1	201	1126	926	8e-110	396
Ps000674	Unigene0002006	99	201	2	0	1	201	735	535	2e-107	388
Ps000675	Unigene0045453	98.59	142	2	0	60	201	1	142	4e-72	270
Ps000676	Unigene0043463	96.55	116	4	0	1	116	775	890	3e-50	198
Ps000677	Unigene0084095	100	201	0	0	1	201	261	61	1e-110	398
Ps000678	Unigene0005276	99	201	2	0	1	201	1138	1338	8e-106	383
Ps000679	Unigene0043398	99	201	2	0	1	201	1856	1656	2e-107	388
Ps000680	Unigene0003785	98.01	201	3	1	1	201	322	123	2e-75	281
Ps000681	Unigene0043077	100	101	0	0	101	201	63	163	6e-51	200
Ps000682	Unigene0008641	98.43	191	3	0	11	201	173	363	4e-102	370
Ps000683	Unigene0004899	99.5	201	1	0	1	201	1350	1550	3e-108	391
Ps000684	Unigene0006078	99	201	2	0	1	201	901	1101	2e-107	388
Ps000686	Unigene0042770	100	201	0	0	1	201	1012	812	1e-110	398
Ps000687	Unigene0002238	100	201	0	0	1	201	220	20	1e-110	398
Ps000688	Unigene0016491	98.01	201	4	0	1	201	640	440	9e-106	382
Ps000689	Unigene0042152	98.51	201	2	1	1	201	236	435	5e-101	367
Ps000690	Unigene0041991	99.5	201	1	0	1	201	396	196	3e-108	391
Ps000691	Unigene0041737	96.08	204	4	2	1	201	857	1059	9e-93	339
Ps000692	Unigene0024300	99	201	2	0	1	201	674	474	2e-107	388
Ps000693	Unigene0017529	97.51	201	5	0	1	201	939	1139	1e-98	359
Ps000694	Unigene0044768	100	201	0	0	1	201	979	1179	1e-110	398
Ps000695	Unigene0043400	97.51	201	5	0	1	201	536	336	2e-103	374
Ps000696	Unigene0045484	97.51	201	5	0	1	201	1308	1508	2e-106	385
Ps000697	Unigene0017613	97.51	201	5	0	1	201	537	337	6e-105	380
Ps000698	Unigene0006116	99.5	201	1	0	1	201	303	103	8e-110	396
Ps000699	Unigene0032718	86.36	132	18	0	1	132	836	967	2e-26	119
Ps000700	Unigene0057985	97.46	197	5	0	1	197	317	121	2e-102	372
Ps000701	Unigene0038430	99	201	2	0	1	201	1123	923	8e-106	383
Ps000702	Unigene0009936	99.5	201	1	0	1	201	794	994	3e-108	391
Ps000703	Unigene0018297	99	201	2	0	1	201	2127	1927	2e-107	388
Ps000704	Unigene0005812	100	189	0	0	1	189	354	166	2e-103	375
Ps000705	Unigene0044857	100	201	0	0	1	201	1233	1033	1e-110	398
Ps000706	Unigene0048777	97.51	201	5	0	1	201	468	668	6e-105	380
Ps000708	Unigene0046189	99.5	201	1	0	1	201	1699	1899	3e-108	391
Ps000709	Unigene0058051	97.76	134	3	0	68	201	780	647	1e-66	252
Ps000710	Unigene0042883	99	200	2	0	1	200	845	1044	9e-109	392
Ps000711	Unigene0041296	99.5	201	1	0	1	201	73	273	3e-108	391
Ps000713	Unigene0041958	98.51	201	3	0	1	201	620	820	1e-106	385
Ps000714	Unigene0003062	99.5	201	1	0	1	201	1075	875	3e-108	391
Ps000715	Unigene0005058	99.5	201	1	0	1	201	842	1042	3e-108	391
Ps000716	Unigene0024773	99.5	201	1	0	1	201	1003	1203	3e-108	391
Ps000717	Unigene0080554	99.32	148	1	0	54	201	1	148	5e-78	290
Ps000718	Unigene0043013	99.5	201	1	0	1	201	356	156	3e-108	391
Ps000719	Unigene0011460	99	201	2	0	1	201	2084	1884	8e-106	383
Ps000720	Unigene0042978	99.42	173	1	0	1	173	1018	1190	2e-91	335
Ps000721	Unigene0017770	99.5	201	1	0	1	201	440	240	8e-110	396
Ps000722	Unigene0003783	99	201	2	0	1	201	4016	4216	8e-106	383
Ps000723	Unigene0008496	99.5	201	1	0	1	201	55	255	8e-110	396
Ps000724	Unigene0042383	99.5	201	0	1	1	201	870	671	8e-106	383
Ps000725	Unigene0083911	99.46	186	1	0	16	201	1	186	3e-99	361
Ps000726	Unigene0042128	100	201	0	0	1	201	120	320	1e-110	398
Ps000727	Unigene0011725	99.5	201	1	0	1	201	1933	1733	3e-108	391
Ps000728	Unigene0050450	99	201	2	0	1	201	900	700	2e-107	388
Ps000729	Unigene0002558	99.5	201	1	0	1	201	566	366	3e-108	391
Ps000730	Unigene0034492	99.5	201	1	0	1	201	714	914	3e-108	391
Ps000731	Unigene0084537	100	201	0	0	1	201	537	337	1e-110	398
Ps000732	Unigene0003772	100	201	0	0	1	201	418	218	1e-110	398
Ps000733	Unigene0008827	99.22	129	1	0	73	201	2162	2034	3e-65	248
Ps000734	Unigene0009570	98.51	201	3	0	1	201	1522	1322	1e-106	385
Ps000735	Unigene0008542	99.5	201	1	0	1	201	287	487	3e-108	391
Ps000736	Unigene0035855	100	201	0	0	1	201	798	598	1e-110	398
Ps000737	Unigene0041806	99.5	201	1	0	1	201	124	324	3e-108	391
Ps000738	Unigene0037836	91.46	164	14	0	36	199	612	449	4e-55	214
Ps000739	Unigene0024778	99.18	122	1	0	80	201	391	270	5e-61	234
Ps000740	Unigene0004407	99	201	2	0	1	201	972	1172	2e-107	388
Ps000741	Unigene0032732	100	201	0	0	1	201	619	419	1e-110	398
Ps000742	Unigene0041205	99.5	201	1	0	1	201	1169	1369	3e-108	391
Ps000743	Unigene0006106	100	100	0	0	102	201	59	158	3e-51	201
Ps000744	Unigene0050524	97.9	143	3	0	1	143	385	243	4e-69	261
Ps000745	Unigene0087126	99.5	201	1	0	1	201	1128	1328	3e-108	391
Ps000746	Unigene0041999	99.5	201	1	0	1	201	2369	2169	8e-110	396
Ps000747	Unigene0016580	99.5	200	1	0	1	200	773	972	5e-108	390
Ps000748	Unigene0048582	100	201	0	0	1	201	231	431	1e-110	398
Ps000749	Unigene0016196	100	101	0	0	101	201	1512	1612	6e-51	200
Ps000750	Unigene0004518	99	201	2	0	1	201	180	380	2e-107	388
Ps000751	Unigene0027953	97.01	201	6	0	1	201	1108	908	6e-101	366
Ps000752	Unigene0004143	99	201	2	0	1	201	128	328	2e-107	388
Ps000753	Unigene0028639	98.86	176	2	0	26	201	93	268	2e-92	338
Ps000754	Unigene0046500	98.45	194	3	0	1	194	445	252	3e-99	361
Ps000755	Unigene0019388	99.5	201	1	0	1	201	238	438	3e-108	391
Ps000756	Unigene0044250	98.51	201	3	0	1	201	89	289	1e-106	385
Ps000757	Unigene0041739	99	201	2	0	1	201	1761	1961	5e-109	393
Ps000758	Unigene0034031	100	201	0	0	1	201	169	369	1e-110	398
Ps000759	Unigene0086340	100	201	0	0	1	201	887	1087	1e-110	398
Ps000760	Unigene0042052	99	201	2	0	1	201	243	43	2e-107	388
Ps000762	Unigene0056626	99.49	197	0	1	5	201	600	405	2e-103	375
Ps000763	Unigene0011615	100	201	0	0	1	201	796	596	1e-110	398
Ps000764	Unigene0041439	98.98	197	2	0	1	197	258	454	2e-103	375
Ps000765	Unigene0085207	98.49	199	3	0	3	201	791	989	9e-106	382
Ps000766	Unigene0082557	100	201	0	0	1	201	1019	819	1e-110	398
Ps000767	Unigene0043982	100	195	0	0	7	201	85	279	5e-107	387
Ps000768	Unigene0048893	99.5	201	1	0	1	201	66	266	3e-108	391
Ps000769	Unigene0007888	98.77	162	2	0	40	201	841	680	5e-85	313
Ps000770	Unigene0046090	98.99	199	2	0	3	201	1416	1218	3e-106	384
Ps000771	Unigene0042110	99	201	2	0	1	201	1110	910	2e-107	388
Ps000772	Unigene0048848	99.5	201	1	0	1	201	694	494	3e-108	391
Ps000773	Unigene0045705	99.5	201	1	0	1	201	1323	1123	3e-108	391
Ps000774	Unigene0010993	98.01	201	4	0	1	201	764	964	1e-102	372
Ps000775	Unigene0006077	99.5	201	1	0	1	201	68	268	3e-108	391
Ps000776	Unigene0011670	98.51	201	3	0	1	201	472	272	1e-106	385
Ps000777	Unigene0045488	99.5	201	1	0	1	201	771	971	3e-108	391
Ps000778	Unigene0050559	99.5	201	1	0	1	201	2131	2331	8e-110	396
Ps000780	Unigene0008996	99	201	2	0	1	201	2972	3172	8e-106	383
Ps000781	Unigene0083729	98.28	174	3	0	6	179	220	47	2e-90	332
Ps000782	Unigene0043554	98.51	201	3	0	1	201	1181	1381	4e-108	390
Ps000783	Unigene0042246	100	100	0	0	102	201	1460	1361	3e-50	198
Ps000784	Unigene0005737	99.5	201	1	0	1	201	569	369	8e-110	396
Ps000785	Unigene0051344	99.12	113	1	0	89	201	473	361	4e-57	221
Ps000786	Unigene0003670	99	201	2	0	1	201	1052	1252	2e-107	388
Ps000787	Unigene0041187	98.51	201	3	0	1	201	939	739	1e-106	385
Ps000788	Unigene0043425	100	201	0	0	1	201	537	337	1e-110	398
Ps000789	Unigene0043324	100	201	0	0	1	201	851	651	1e-110	398
Ps000790	Unigene0082065	93.22	177	12	0	1	177	177	1	1e-67	256
Ps000791	Unigene0005069	99	201	2	0	1	201	379	179	5e-109	393
Ps000792	Unigene0018494	99	201	2	0	1	201	1443	1243	2e-107	388
Ps000793	Unigene0042275	99	201	2	0	1	201	863	1063	2e-107	388
Ps000795	Unigene0042655	99.5	201	1	0	1	201	515	315	3e-108	391
Ps000796	Unigene0041713	99	201	2	0	1	201	1545	1745	2e-107	388
Ps000797	Unigene0086190	100	104	0	0	98	201	1	104	1e-52	206
Ps000798	Unigene0042326	99.5	201	1	0	1	201	251	451	3e-108	391
Ps000800	Unigene0043776	97.6	167	2	2	1	167	176	12	2e-77	289
Ps000801	Unigene0007193	100	201	0	0	1	201	794	594	1e-110	398
Ps000802	Unigene0082954	98.01	201	4	0	1	201	463	663	5e-101	367
Ps000803	Unigene0005850	99	201	2	0	1	201	367	167	2e-107	388
Ps000804	Unigene0043227	99	201	2	0	1	201	1084	884	2e-107	388
Ps000805	Unigene0031536	99.5	201	1	0	1	201	996	796	3e-108	391
Ps000806	Unigene0036545	96.04	101	4	0	101	201	339	239	1e-43	176
Ps000807	Unigene0011691	98.01	201	4	0	1	201	331	131	3e-104	377
Ps000808	Unigene0004519	99	201	2	0	1	201	1195	1395	2e-107	388
Ps000809	Unigene0041229	95.86	145	4	2	1	145	194	52	1e-59	229
Ps000810	Unigene0019049	99.5	201	1	0	1	201	1057	857	3e-108	391
Ps000811	Unigene0042067	99.5	201	1	0	1	201	690	890	3e-108	391
Ps000812	Unigene0020109	95.05	202	9	1	1	201	160	361	5e-91	333
Ps000813	Unigene0045219	99.5	201	1	0	1	201	1081	881	3e-108	391
Ps000814	Unigene0044819	99.5	201	1	0	1	201	1473	1673	3e-108	391
Ps000815	Unigene0015806	99.5	201	1	0	1	201	291	491	3e-108	391
Ps000816	Unigene0020739	99.5	201	1	0	1	201	1552	1752	3e-108	391
Ps000817	Unigene0046055	98.51	202	2	1	1	201	970	1171	3e-103	374
Ps000818	Unigene0034679	86.46	192	26	0	5	196	72	263	2e-43	175
Ps000819	Unigene0042106	99.5	202	0	1	1	201	1865	2066	2e-106	385
Ps000820	Unigene0006953	98.51	201	2	1	1	201	1852	1653	1e-91	335
Ps000821	Unigene0050321	99.5	201	1	0	1	201	735	935	3e-108	391
Ps000822	Unigene0004874	99	201	2	0	1	201	532	332	2e-107	388
Ps000823	Unigene0040199	89.95	199	20	0	1	199	905	707	1e-61	236
Ps000824	Unigene0083770	99	201	2	0	1	201	872	1072	2e-107	388
Ps000825	Unigene0010791	99	201	2	0	1	201	338	138	2e-107	388
Ps000826	Unigene0042049	99.5	201	1	0	1	201	533	733	3e-108	391
Ps000827	Unigene0020770	99	201	2	0	1	201	1337	1137	8e-106	383
Ps000828	Unigene0045558	99	201	2	0	1	201	299	499	2e-107	388
Ps000829	Unigene0045476	99	201	2	0	1	201	474	274	2e-107	388
Ps000830	Unigene0052435	99	201	2	0	1	201	867	667	2e-107	388
Ps000831	Unigene0043999	100	201	0	0	1	201	994	1194	1e-110	398
Ps000832	Unigene0004716	98.01	201	4	0	1	201	1763	1563	9e-106	382
Ps000833	Unigene0042269	99	201	2	0	1	201	196	396	2e-107	388
Ps000834	Unigene0041791	100	201	0	0	1	201	1573	1773	1e-110	398
Ps000835	Unigene0007417	98.51	201	3	0	1	201	677	477	1e-106	385
Ps000836	Unigene0044375	100	201	0	0	1	201	47	247	1e-110	398
Ps000837	Unigene0014352	100	201	0	0	1	201	211	11	1e-110	398
Ps000838	Unigene0028346	99.5	201	1	0	1	201	871	671	8e-110	396
Ps000839	Unigene0042018	99.5	201	1	0	1	201	1368	1568	3e-108	391
Ps000840	Unigene0042852	95.52	201	7	1	1	201	679	481	2e-90	331
Ps000841	Unigene0050462	98.93	187	1	1	1	186	445	631	2e-95	348
Ps000842	Unigene0018892	100	201	0	0	1	201	694	494	5e-98	357
Ps000843	Unigene0041594	98.51	201	3	0	1	201	386	186	1e-106	385
Ps000844	Unigene0041450	99.21	126	0	1	1	125	304	179	1e-61	236
Ps000845	Unigene0072701	99.45	183	1	0	1	183	318	500	2e-97	355
Ps000846	Unigene0032159	99	201	2	0	1	201	684	484	2e-107	388
Ps000847	Unigene0043706	100	132	0	0	70	201	1	132	1e-69	263
Ps000848	Unigene0021867	100	201	0	0	1	201	626	426	1e-110	398
Ps000849	Unigene0064461	98.51	201	3	0	1	201	364	164	5e-105	380
Ps000850	Unigene0002799	100	146	0	0	1	146	146	1	9e-78	289
Ps000851	Unigene0009983	100	201	0	0	1	201	711	911	3e-96	351
Ps000852	Unigene0051612	100	201	0	0	1	201	1407	1207	1e-110	398
Ps000853	Unigene0041598	99.5	201	1	0	1	201	1027	827	3e-108	391
Ps000854	Unigene0027627	100	201	0	0	1	201	582	782	1e-110	398
Ps000855	Unigene0041760	99	201	2	0	1	201	443	643	2e-107	388
Ps000856	Unigene0049409	99.5	201	1	0	1	201	1328	1128	3e-108	391
Ps000857	Unigene0043736	100	155	0	0	1	155	242	88	4e-83	307
Ps000858	Unigene0046208	99.5	201	1	0	1	201	128	328	8e-110	396
Ps000859	Unigene0047986	99.5	201	1	0	1	201	673	473	8e-110	396
Ps000860	Unigene0020716	99.5	199	1	0	1	199	1732	1534	5e-109	393
Ps000861	Unigene0006250	99	201	2	0	1	201	877	677	5e-109	393
Ps000862	Unigene0005025	99.5	201	1	0	1	201	465	265	3e-108	391
Ps000863	Unigene0042703	99	201	2	0	1	201	730	530	5e-109	393
Ps000864	Unigene0015680	98.01	201	4	0	1	201	1647	1847	3e-104	377
Ps000865	Unigene0022292	99.5	201	1	0	1	201	292	92	3e-108	391
Ps000866	Unigene0042551	99	201	2	0	1	201	684	884	5e-109	393
Ps000867	Unigene0053223	99.5	201	1	0	1	201	616	816	8e-110	396
Ps000868	Unigene0043049	100	201	0	0	1	201	561	761	1e-110	398
Ps000870	Unigene0022680	99.45	181	1	0	21	201	1343	1163	8e-98	356
Ps000871	Unigene0026569	100	201	0	0	1	201	744	944	1e-110	398
Ps000872	Unigene0015242	98.51	201	3	0	1	201	270	470	1e-106	385
Ps000873	Unigene0003915	99.5	201	1	0	1	201	97	297	3e-108	391
Ps000874	Unigene0004380	98.51	201	3	0	1	201	648	448	2e-105	381
Ps000875	Unigene0044508	100	201	0	0	1	201	826	1026	1e-110	398
Ps000876	Unigene0021106	99	201	2	0	1	201	1325	1525	2e-107	388
Ps000878	Unigene0044026	99	201	2	0	1	201	427	627	8e-106	383
Ps000879	Unigene0009953	100	201	0	0	1	201	1126	1326	1e-110	398
Ps000880	Unigene0009825	99	201	2	0	1	201	737	537	7e-77	286
Ps000881	Unigene0002035	99	201	1	1	1	201	1334	1533	2e-103	375
Ps000882	Unigene0041522	100	201	0	0	1	201	252	52	1e-110	398
Ps000883	Unigene0004631	98.92	186	2	0	1	186	1009	1194	7e-97	353
Ps000884	Unigene0038028	100	201	0	0	1	201	365	165	1e-110	398
Ps000885	Unigene0051698	100	201	0	0	1	201	606	406	1e-110	398
Ps000886	Unigene0010189	98.51	201	3	0	1	201	869	669	1e-106	385
Ps000887	Unigene0043314	98.95	190	2	0	1	190	185	374	8e-101	366
Ps000888	Unigene0042224	99.5	201	1	0	1	201	1437	1637	3e-108	391
Ps000890	Unigene0041704	99.5	201	1	0	1	201	330	130	8e-110	396
Ps000891	Unigene0009529	99	201	2	0	1	201	834	1034	5e-109	393
Ps000892	Unigene0037860	98.43	127	2	0	1	127	156	30	3e-63	241
Ps000893	Unigene0027721	100	138	0	0	1	138	138	1	3e-73	274
Ps000894	Unigene0042698	97.51	201	5	0	1	201	251	51	2e-103	374
Ps000895	Unigene0046125	97.51	201	5	0	1	201	710	510	9e-102	369
Ps000896	Unigene0043620	98.51	201	2	1	1	201	616	417	1e-102	372
Ps000897	Unigene0011283	99	201	2	0	1	201	619	419	2e-107	388
Ps000898	Unigene0044650	99	201	2	0	1	201	800	600	2e-107	388
Ps000900	Unigene0007314	99	201	2	0	1	201	511	311	5e-109	393
Ps000901	Unigene0041297	99.5	201	1	0	1	201	1100	900	8e-110	396
Ps000902	Unigene0009667	96.02	201	6	2	1	201	438	240	9e-90	329
Ps000903	Unigene0005954	99.5	201	1	0	1	201	851	651	3e-108	391
Ps000904	Unigene0041466	99	201	2	0	1	201	407	207	2e-107	388
Ps000905	Unigene0044481	99.5	201	1	0	1	201	283	83	3e-108	391
Ps000906	Unigene0005754	99	201	2	0	1	201	2580	2380	2e-107	388
Ps000907	Unigene0048231	99	201	2	0	1	201	640	840	5e-109	393
Ps000908	Unigene0044763	100	201	0	0	1	201	15	215	1e-110	398
Ps000909	Unigene0041886	100	201	0	0	1	201	738	538	1e-110	398
Ps000910	Unigene0045892	100	201	0	0	1	201	1002	802	1e-110	398
Ps000911	Unigene0019563	98.64	147	2	0	1	147	405	259	2e-62	239
Ps000912	Unigene0004863	99	201	2	0	1	201	404	204	2e-107	388
Ps000914	Unigene0082996	98.01	201	4	0	1	201	210	410	1e-102	372
Ps000915	Unigene0083709	99.5	201	1	0	1	201	693	893	3e-108	391
Ps000916	Unigene0081534	99	201	2	0	1	201	1844	2044	8e-106	383
Ps000917	Unigene0044541	98.43	191	1	1	1	191	189	1	1e-95	349
Ps000918	Unigene0035368	98.51	201	3	0	1	201	252	452	4e-108	390
Ps000919	Unigene0042700	98.92	186	2	0	1	186	196	11	2e-98	358
Ps000920	Unigene0084353	99	201	2	0	1	201	96	296	2e-107	388
Ps000921	Unigene0041741	100	201	0	0	1	201	1452	1652	1e-110	398
Ps000922	Unigene0009561	99	201	2	0	1	201	642	442	8e-106	383
Ps000923	Unigene0037373	96.52	201	6	1	1	201	1265	1464	2e-81	301
Ps000924	Unigene0082424	99	201	2	0	1	201	3041	3241	5e-109	393
Ps000925	Unigene0045496	99	100	1	0	102	201	1573	1474	2e-49	195
Ps000926	Unigene0038832	100	201	0	0	1	201	293	93	1e-110	398
Ps000927	Unigene0043019	100	199	0	0	1	199	668	470	2e-109	394
Ps000928	Unigene0010838	100	201	0	0	1	201	136	336	1e-110	398
Ps000929	Unigene0012296	98.51	202	2	1	1	201	655	856	3e-103	374
Ps000930	Unigene0024834	95.52	201	9	0	1	201	193	393	2e-98	358
Ps000931	Unigene0011424	99.18	122	1	0	80	201	1803	1682	5e-61	234
Ps000932	Unigene0004900	98.26	172	3	0	17	188	73	244	1e-87	322
Ps000933	Unigene0050666	97.51	201	5	0	1	201	632	832	3e-100	364
Ps000934	Unigene0004040	100	101	0	0	101	201	1014	914	6e-51	200
Ps000935	Unigene0042459	98.51	201	3	0	1	201	579	379	5e-105	380
Ps000936	Unigene0034070	99.5	201	1	0	1	201	735	935	8e-110	396
Ps000937	Unigene0045301	99.5	201	1	0	1	201	1501	1301	8e-110	396
Ps000938	Unigene0040806	89.69	194	20	0	1	194	590	397	4e-60	231
Ps000941	Unigene0058306	98.51	201	3	0	1	201	573	773	5e-105	380
Ps000942	Unigene0044071	98.01	201	4	0	1	201	890	1090	1e-102	372
Ps000943	Unigene0042791	97.51	201	5	0	1	201	884	684	6e-105	380
Ps000944	Unigene0013192	99.5	201	1	0	1	201	143	343	8e-110	396
Ps000945	Unigene0002470	100	201	0	0	1	201	541	341	1e-110	398
Ps000946	Unigene0008204	98.51	201	3	0	1	201	1639	1439	1e-106	385
Ps000947	Unigene0031776	99.19	124	1	0	1	124	124	1	3e-62	238
Ps000948	Unigene0045243	98.01	201	4	0	1	201	1104	904	9e-106	382
Ps000949	Unigene0041552	99.5	201	1	0	1	201	386	186	8e-110	396
Ps000950	Unigene0004705	98.51	201	3	0	1	201	536	336	1e-106	385
Ps000951	Unigene0049953	98.78	164	2	0	38	201	1	164	8e-71	266
Ps000952	Unigene0009068	85.07	201	30	0	1	201	869	669	5e-39	161
Ps000954	Unigene0046432	99	201	2	0	1	201	571	371	2e-107	388
Ps000955	Unigene0048038	100	201	0	0	1	201	696	496	1e-110	398
Ps000956	Unigene0004565	99	201	2	0	1	201	830	630	2e-107	388
Ps000957	Unigene0085445	100	201	0	0	1	201	39	239	5e-98	357
Ps000958	Unigene0047160	98.51	201	3	0	1	201	136	336	4e-108	390
Ps000959	Unigene0042142	98.51	201	3	0	1	201	99	299	5e-105	380
Ps000960	Unigene0043129	98.51	201	3	0	1	201	1486	1286	1e-106	385
Ps000961	Unigene0044918	99	201	2	0	1	201	424	624	5e-109	393
Ps000962	Unigene0006223	99.5	199	1	0	1	199	1196	1394	5e-107	387
Ps000963	Unigene0006350	99	201	2	0	1	201	427	227	2e-107	388
Ps000964	Unigene0044807	98.51	201	3	0	1	201	418	218	5e-105	380
Ps000965	Unigene0042161	99.5	201	0	1	1	201	260	61	2e-91	335
Ps000966	Unigene0023208	98.9	182	2	0	1	182	125	306	1e-97	355
Ps000967	Unigene0044507	100	201	0	0	1	201	1065	865	1e-110	398
Ps000968	Unigene0007697	98.5	200	3	0	2	201	268	467	3e-92	337
Ps000969	Unigene0016106	99.5	201	1	0	1	201	1019	819	3e-108	391
Ps000970	Unigene0042673	98.51	201	3	0	1	201	300	500	1e-106	385
Ps000971	Unigene0008813	98.51	201	3	0	1	201	72	272	5e-105	380
Ps000972	Unigene0004054	100	201	0	0	1	201	1466	1266	1e-110	398
Ps000973	Unigene0003397	99.5	201	1	0	1	201	2145	2345	3e-108	391
Ps000975	Unigene0017112	100	201	0	0	1	201	673	873	1e-110	398
Ps000976	Unigene0045917	100	120	0	0	82	201	23	142	3e-62	238
Ps000977	Unigene0086653	99.22	129	1	0	73	201	1226	1354	1e-66	253
Ps000978	Unigene0043321	97.51	201	3	2	1	201	686	884	2e-98	358
Ps000979	Unigene0015400	99.5	201	1	0	1	201	733	533	3e-108	391
Ps000980	Unigene0047869	99.5	201	1	0	1	201	164	364	8e-110	396
Ps000981	Unigene0044513	98.01	201	4	0	1	201	681	481	9e-106	382
Ps000982	Unigene0013933	99.5	201	1	0	1	201	1705	1905	3e-97	354
Ps000983	Unigene0068767	87.77	139	14	1	59	197	280	145	8e-32	137
Ps000984	Unigene0004993	100	201	0	0	1	201	586	386	1e-110	398
Ps000985	Unigene0012739	100	201	0	0	1	201	1528	1328	1e-110	398
Ps000986	Unigene0042075	99.5	201	1	0	1	201	1787	1587	3e-108	391
Ps000987	Unigene0043404	98.51	201	3	0	1	201	693	493	1e-106	385
Ps000989	Unigene0012296	98.02	202	3	1	1	201	666	867	8e-102	369
Ps000990	Unigene0032776	97.51	201	5	0	1	201	1446	1246	6e-105	380
Ps000991	Unigene0045862	98.51	201	3	0	1	201	767	567	5e-105	380
Ps000992	Unigene0037165	98.31	177	3	0	1	177	670	846	9e-94	342
Ps000993	Unigene0001826	99.5	201	1	0	1	201	508	308	8e-110	396
Ps000994	Unigene0041537	100	201	0	0	1	201	342	542	1e-110	398
Ps000995	Unigene0042030	90.57	212	4	1	6	201	114	325	2e-77	288
Ps000996	Unigene0004727	98.51	201	3	0	1	201	487	687	1e-106	385
Ps000997	Unigene0012436	99.5	201	1	0	1	201	1408	1608	3e-108	391
Ps000998	Unigene0005323	99.5	201	1	0	1	201	509	309	8e-110	396
Ps000999	Unigene0018938	98.01	201	4	0	1	201	520	320	3e-104	377
Ps001000	Unigene0014998	99.5	201	1	0	1	201	764	964	3e-108	391
Ps001001	Unigene0045374	95.02	201	10	0	1	201	240	440	1e-100	366
Ps001002	Unigene0048636	99	201	2	0	1	201	269	69	2e-107	388
Ps001003	Unigene0026571	98.51	201	3	0	1	201	1111	911	1e-106	385
Ps001004	Unigene0046213	99.5	201	1	0	1	201	2041	1841	3e-108	391
Ps001005	Unigene0007014	99.5	201	1	0	1	201	112	312	3e-108	391
Ps001006	Unigene0018227	99.5	201	1	0	1	201	555	755	8e-110	396
Ps001007	Unigene0044676	99	100	1	0	102	201	68	167	3e-48	191
Ps001008	Unigene0042374	99	201	2	0	1	201	432	232	2e-107	388
Ps001009	Unigene0008128	99	201	2	0	1	201	491	691	2e-107	388
Ps001010	Unigene0005059	99.5	201	1	0	1	201	1262	1462	3e-108	391
Ps001011	Unigene0044309	98.52	203	1	1	1	201	911	1113	8e-103	373
Ps001012	Unigene0043426	97.51	201	5	0	1	201	1296	1496	6e-105	380
Ps001014	Unigene0082879	99.5	201	1	0	1	201	313	513	3e-108	391
Ps001015	Unigene0045191	100	117	0	0	1	117	1125	1241	2e-60	232
Ps001017	Unigene0043178	99.5	201	1	0	1	201	503	703	3e-108	391
Ps001018	Unigene0084036	99	201	2	0	1	201	527	727	2e-107	388
Ps001019	Unigene0042427	98.51	201	3	0	1	201	302	502	5e-105	380
Ps001020	Unigene0002895	98.01	201	4	0	1	201	345	145	3e-104	377
Ps001021	Unigene0004506	98.01	201	4	0	1	201	471	671	2e-107	388
Ps001022	Unigene0004525	99	201	2	0	1	201	218	18	5e-109	393
Ps001024	Unigene0041404	99.47	190	1	0	1	190	2058	2247	1e-101	369
Ps001025	Unigene0047712	99.5	201	1	0	1	201	524	724	8e-110	396
Ps001026	Unigene0006711	99.04	104	1	0	98	201	1302	1199	3e-50	198
Ps001027	Unigene0040199	92.35	196	15	0	1	196	917	722	4e-72	270
Ps001028	Unigene0043066	99.5	201	1	0	1	201	21	221	3e-108	391
Ps001029	Unigene0024999	99	201	2	0	1	201	63	263	2e-107	388
Ps001030	Unigene0048655	100	201	0	0	1	201	242	442	1e-110	398
Ps001031	Unigene0060465	100	133	0	0	1	133	486	618	5e-70	264
Ps001032	Unigene0043399	99.5	201	1	0	1	201	416	616	8e-110	396
Ps001033	Unigene0044531	99.5	201	1	0	1	201	517	717	3e-108	391
Ps001034	Unigene0083945	98.94	188	2	0	14	201	786	973	5e-98	357
Ps001035	Unigene0045752	99	201	2	0	1	201	436	636	8e-106	383
Ps001036	Unigene0021006	99.5	201	1	0	1	201	443	243	3e-108	391
Ps001038	Unigene0046927	98.51	201	3	0	1	201	899	699	5e-105	380
Ps001039	Unigene0044548	99	201	2	0	1	201	765	965	5e-109	393
Ps001040	Unigene0007369	98.57	140	1	1	1	139	183	44	5e-67	254
Ps001041	Unigene0043187	100	100	0	0	102	201	90	189	3e-50	198
Ps001042	Unigene0043182	99	201	2	0	1	201	585	385	2e-107	388
Ps001043	Unigene0004172	98.9	181	1	1	1	181	1477	1656	2e-91	335
Ps001044	Unigene0032668	98.51	201	3	0	1	201	209	9	1e-106	385
Ps001045	Unigene0027716	94.95	198	10	0	4	201	429	626	6e-85	313
Ps001046	Unigene0047197	98.01	201	4	0	1	201	307	507	3e-104	377
Ps001047	Unigene0004280	98.01	201	4	0	1	201	1132	932	2e-107	388
Ps001048	Unigene0041913	98.01	201	4	0	1	201	1185	985	9e-106	382
Ps001049	Unigene0002900	99.29	141	1	0	1	141	225	85	2e-72	272
Ps001050	Unigene0083012	100	201	0	0	1	201	811	611	1e-110	398
Ps001051	Unigene0047546	99	201	2	0	1	201	1401	1201	8e-106	383
Ps001052	Unigene0036349	98.79	165	1	1	38	201	857	693	2e-83	308
Ps001053	Unigene0046377	100	201	0	0	1	201	587	387	1e-110	398
Ps001054	Unigene0034222	98.01	201	4	0	1	201	840	640	5e-101	367
Ps001055	Unigene0046248	99.5	201	1	0	1	201	1114	1314	8e-110	396
Ps001057	Unigene0033635	99	201	2	0	1	201	234	34	5e-109	393
Ps001058	Unigene0049007	100	201	0	0	1	201	106	306	1e-110	398
Ps001059	Unigene0041446	98.51	201	3	0	1	201	1186	1386	4e-108	390
Ps001060	Unigene0042203	97.01	201	6	0	1	201	49	249	2e-99	361
Ps001061	Unigene0013562	99.5	201	1	0	1	201	567	767	3e-108	391
Ps001062	Unigene0042189	99.5	201	1	0	1	201	826	1026	3e-108	391
Ps001063	Unigene0047866	87.56	201	25	0	1	201	593	393	5e-58	224
Ps001064	Unigene0008676	99.5	201	1	0	1	201	1911	1711	8e-110	396
Ps001065	Unigene0010142	99.5	201	1	0	1	201	1268	1068	3e-108	391
Ps001066	Unigene0022872	99.34	152	1	0	1	152	2898	3049	6e-79	293
Ps001067	Unigene0045071	100	201	0	0	1	201	743	943	1e-110	398
Ps001068	Unigene0005548	98.51	201	3	0	1	201	352	552	1e-106	385
Ps001069	Unigene0035647	99.5	201	1	0	1	201	450	250	3e-108	391
Ps001070	Unigene0025828	99.31	144	1	0	58	201	109	252	3e-74	278
Ps001071	Unigene0043958	96.52	201	7	0	1	201	643	843	7e-105	379
Ps001072	Unigene0004111	99.5	201	1	0	1	201	707	907	3e-108	391
Ps001073	Unigene0043338	100	201	0	0	1	201	786	986	1e-110	398
Ps001074	Unigene0008680	98.01	201	4	0	1	201	677	877	3e-104	377
Ps001075	Unigene0086343	99.5	201	1	0	1	201	580	780	3e-108	391
Ps001076	Unigene0008703	99.5	201	1	0	1	201	967	1167	3e-108	391
Ps001077	Unigene0004623	100	201	0	0	1	201	940	1140	1e-110	398
Ps001078	Unigene0005531	99	201	2	0	1	201	1117	917	2e-107	388
Ps001079	Unigene0042029	99	201	2	0	1	201	761	561	2e-107	388
Ps001080	Unigene0041636	98.51	201	3	0	1	201	173	373	1e-106	385
Ps001081	Unigene0041750	100	158	0	0	1	158	296	139	6e-85	313
Ps001082	Unigene0085584	99	201	2	0	1	201	382	182	8e-106	383
Ps001083	Unigene0087111	99.02	102	0	1	101	201	1448	1347	1e-46	186
Ps001084	Unigene0016230	99	201	2	0	1	201	166	366	2e-107	388
Ps001085	Unigene0009932	98.51	201	3	0	1	201	1165	1365	2e-103	375
Ps001086	Unigene0018875	98.99	199	2	0	3	201	423	225	5e-105	380
Ps001087	Unigene0019655	100	201	0	0	1	201	2675	2875	1e-110	398
Ps001088	Unigene0033768	95.94	197	8	0	5	201	242	46	3e-95	348
Ps001089	Unigene0027245	99.5	201	1	0	1	201	356	556	3e-108	391
Ps001090	Unigene0042130	98.51	201	2	1	1	201	576	377	3e-104	377
Ps001091	Unigene0009309	98.02	101	2	0	101	201	1356	1256	4e-49	194
Ps001092	Unigene0041338	98.01	201	4	0	1	201	1277	1477	9e-106	382
Ps001093	Unigene0007858	88.56	201	23	0	1	201	501	701	4e-57	221
Ps001094	Unigene0004110	98.95	190	2	0	1	190	1163	974	8e-101	366
Ps001095	Unigene0041292	98.01	201	3	1	1	201	701	900	1e-98	359
Ps001096	Unigene0021903	100	102	0	0	100	201	1437	1336	8e-52	203
Ps001097	Unigene0048920	98.49	199	3	0	1	199	1225	1027	2e-107	388
Ps001098	Unigene0086540	96.64	119	4	0	83	201	898	1016	1e-56	219
Ps001099	Unigene0007171	94.03	201	1	1	1	201	156	345	2e-85	315
Ps001100	Unigene0041531	99	201	2	0	1	201	986	1186	5e-109	393
Ps001101	Unigene0034506	98.65	148	2	0	54	201	666	519	9e-75	279
Ps001102	Unigene0042369	98.51	201	3	0	1	201	559	759	1e-106	385
Ps001103	Unigene0045063	99.37	159	1	0	43	201	2157	1999	6e-85	313
Ps001104	Unigene0023550	98.98	196	2	0	6	201	746	941	3e-90	331
Ps001105	Unigene0085379	98.45	129	1	1	73	201	213	340	2e-60	232
Ps001106	Unigene0043468	99.5	201	1	0	1	201	439	639	3e-108	391
Ps001107	Unigene0042565	98.51	201	3	0	1	201	1296	1096	5e-105	380
Ps001108	Unigene0004018	100	201	0	0	1	201	1499	1299	1e-110	398
Ps001109	Unigene0044890	99.5	201	1	0	1	201	390	190	8e-110	396
Ps001110	Unigene0009231	100	132	0	0	70	201	93	224	2e-69	262
Ps001111	Unigene0008568	100	201	0	0	1	201	437	637	1e-110	398
Ps001112	Unigene0044161	100	201	0	0	1	201	164	364	1e-110	398
Ps001113	Unigene0045295	99.5	201	1	0	1	201	49	249	3e-108	391
Ps001114	Unigene0010337	98.51	201	3	0	1	201	917	1117	2e-103	375
Ps001115	Unigene0004480	99	201	2	0	1	201	1214	1014	8e-106	383
Ps001116	Unigene0011277	98.85	174	1	1	1	174	180	8	7e-89	326
Ps001117	Unigene0081498	98.51	201	3	0	1	201	381	181	5e-105	380
Ps001118	Unigene0043977	100	201	0	0	1	201	1661	1461	1e-110	398
Ps001119	Unigene0083629	100	201	0	0	1	201	1318	1118	1e-110	398
Ps001120	Unigene0042844	99.5	201	1	0	1	201	337	137	3e-108	391
Ps001121	Unigene0042177	100	187	0	0	14	200	30	216	1e-102	372
Ps001122	Unigene0003863	98.51	201	3	0	1	201	1052	852	1e-106	385
Ps001123	Unigene0046017	99.41	169	1	0	33	201	728	560	4e-89	327
Ps001124	Unigene0047756	99	201	2	0	1	201	584	784	8e-106	383
Ps001125	Unigene0062194	92.31	117	9	0	85	201	19	135	4e-39	161
Ps001126	Unigene0003364	97.51	201	5	0	1	201	169	369	2e-103	374
Ps001127	Unigene0049095	99	201	2	0	1	201	1413	1213	2e-107	388
Ps001128	Unigene0002704	100	201	0	0	1	201	1298	1498	1e-110	398
Ps001129	Unigene0034142	99.5	201	1	0	1	201	349	149	3e-108	391
Ps001130	Unigene0045065	99.5	201	1	0	1	201	293	493	8e-110	396
Ps001131	Unigene0025180	98	100	2	0	102	201	18	117	1e-45	182
Ps001132	Unigene0044873	98.01	201	4	0	1	201	93	293	3e-104	377
Ps001133	Unigene0044862	96.52	201	6	1	1	201	586	785	4e-96	350
Ps001134	Unigene0019418	99	201	2	0	1	201	615	415	2e-107	388
Ps001135	Unigene0003376	98.01	201	4	0	1	201	224	24	5e-101	367
Ps001136	Unigene0044439	100	201	0	0	1	201	191	391	1e-110	398
Ps001137	Unigene0014138	98.45	194	3	0	1	194	347	540	8e-101	366
Ps001138	Unigene0050005	99.5	201	1	0	1	201	795	595	8e-110	396
Ps001139	Unigene0016451	98.95	190	2	0	12	201	173	362	2e-102	371
Ps001140	Unigene0050529	99.32	148	1	0	1	148	88	235	1e-76	285
Ps001142	Unigene0010715	92.22	180	14	0	22	201	437	258	1e-64	246
Ps001143	Unigene0028630	98.01	201	4	0	1	201	1088	888	9e-106	382
Ps001144	Unigene0044830	98.51	201	3	0	1	201	357	557	5e-105	380
Ps001145	Unigene0083250	99.5	201	1	0	1	201	73	273	8e-110	396
Ps001147	Unigene0045433	99.5	201	1	0	1	201	260	60	3e-108	391
Ps001148	Unigene0017797	99.5	201	1	0	1	201	1918	1718	3e-108	391
Ps001149	Unigene0042294	98.99	199	2	0	3	201	1531	1333	3e-106	384
Ps001150	Unigene0041499	99.5	201	1	0	1	201	771	571	3e-108	391
Ps001151	Unigene0003355	96.32	163	6	0	39	201	1	163	5e-78	290
Ps001152	Unigene0041495	99	201	2	0	1	201	530	330	2e-107	388
Ps001153	Unigene0041347	99	201	2	0	1	201	537	337	5e-109	393
Ps001154	Unigene0007707	99.35	154	1	0	1	154	329	482	4e-80	297
Ps001155	Unigene0042444	97.51	201	5	0	1	201	674	474	6e-105	380
Ps001156	Unigene0046030	99.49	197	1	0	5	201	1252	1448	8e-106	383
Ps001157	Unigene0005542	99	201	2	0	1	201	314	514	5e-109	393
Ps001158	Unigene0051419	99.5	201	1	0	1	201	1178	1378	8e-110	396
Ps001159	Unigene0045033	99.5	201	1	0	1	201	314	114	8e-110	396
Ps001160	Unigene0076637	92.24	116	9	0	1	116	116	1	2e-38	159
Ps001161	Unigene0004340	98.51	201	3	0	1	201	813	613	1e-106	385
Ps001162	Unigene0008592	99	201	2	0	1	201	480	280	8e-106	383
Ps001163	Unigene0050091	99	201	2	0	1	201	948	748	2e-107	388
Ps001164	Unigene0033340	99.44	179	1	0	1	179	344	166	2e-95	348
Ps001165	Unigene0041281	99.5	201	1	0	1	201	603	803	3e-88	324
Ps001166	Unigene0006766	98.51	201	3	0	1	201	479	279	2e-103	375
Ps001167	Unigene0011775	99.5	202	0	1	1	201	206	5	2e-106	385
Ps001168	Unigene0086245	99.5	201	1	0	1	201	480	280	3e-108	391
Ps001169	Unigene0031399	99.13	115	1	0	1	115	115	1	4e-57	221
Ps001170	Unigene0013189	99	201	2	0	1	201	1013	1213	8e-106	383
Ps001171	Unigene0044279	100	101	0	0	101	201	28	128	6e-51	200
Ps001172	Unigene0037071	99.42	172	1	0	30	201	224	395	2e-92	338
Ps001173	Unigene0046060	99	201	2	0	1	201	925	1125	2e-107	388
Ps001174	Unigene0008238	99.01	202	1	1	1	201	2133	1932	3e-91	334
Ps001175	Unigene0038976	99.5	201	1	0	1	201	1095	895	3e-108	391
Ps001176	Unigene0049359	96.48	199	7	0	3	201	614	416	9e-96	349
Ps001177	Unigene0019856	99.5	201	1	0	1	201	356	156	3e-108	391
Ps001178	Unigene0042632	99.5	201	1	0	1	201	665	865	3e-108	391
Ps001180	Unigene0004700	99	201	2	0	1	201	1032	832	5e-93	340
Ps001181	Unigene0044231	98.84	173	2	0	1	173	173	1	1e-90	332
Ps001182	Unigene0041762	98.68	152	2	0	50	201	1041	1192	1e-79	296
Ps001183	Unigene0043457	100	101	0	0	101	201	1805	1705	6e-51	200
Ps001184	Unigene0004538	98.51	201	3	0	1	201	1401	1601	4e-89	327
Ps001185	Unigene0045633	96.95	197	3	1	8	201	1161	965	1e-95	349
Ps001186	Unigene0014908	100	201	0	0	1	201	1496	1296	1e-110	398
Ps001187	Unigene0086552	100	201	0	0	1	201	745	545	1e-110	398
Ps001189	Unigene0045145	99	201	1	1	1	201	26	225	2e-103	375
Ps001190	Unigene0041982	99.5	201	1	0	1	201	308	108	3e-108	391
Ps001191	Unigene0050838	99.5	201	1	0	1	201	548	348	8e-110	396
Ps001192	Unigene0010365	99.5	201	1	0	1	201	592	392	3e-108	391
Ps001193	Unigene0002833	98.51	201	2	1	1	201	961	1160	1e-102	372
Ps001194	Unigene0045929	97.52	202	3	2	1	201	111	311	5e-96	350
Ps001195	Unigene0011400	100	201	0	0	1	201	2074	1874	1e-110	398
Ps001196	Unigene0003429	98.99	199	2	0	1	199	591	393	1e-106	385
Ps001197	Unigene0041860	99.38	162	0	1	41	202	101	261	4e-85	314
Ps001198	Unigene0043542	98.51	201	3	0	1	201	787	987	1e-106	385
Ps001199	Unigene0052174	98.51	201	2	1	1	201	138	337	1e-102	372
Ps001200	Unigene0042661	98.51	201	3	0	1	201	990	790	1e-106	385
Ps001201	Unigene0009772	100	201	0	0	1	201	2012	2212	1e-110	398
Ps001202	Unigene0006422	98.99	199	2	0	3	201	218	416	5e-105	380
Ps001203	Unigene0045438	100	201	0	0	1	201	1694	1894	1e-110	398
Ps001204	Unigene0004465	100	193	0	0	1	193	1065	1257	8e-106	383
Ps001205	Unigene0041208	99.5	201	1	0	1	201	82	282	3e-108	391
Ps001206	Unigene0086202	96.04	101	4	0	101	201	86	186	8e-43	173
Ps001207	Unigene0041706	98.51	201	3	0	1	201	368	568	5e-105	380
Ps001208	Unigene0015948	98.02	202	3	1	1	201	291	90	2e-102	371
Ps001209	Unigene0005688	98.95	190	2	0	12	201	1448	1259	3e-88	324
Ps001210	Unigene0087050	99	201	2	0	1	201	267	467	8e-106	383
Ps001211	Unigene0042603	98.51	201	3	0	1	201	1344	1544	5e-105	380
Ps001212	Unigene0044104	99	201	2	0	1	201	365	165	8e-106	383
Ps001213	Unigene0034048	99.5	201	1	0	1	201	1914	2114	3e-108	391
Ps001214	Unigene0041341	100	201	0	0	1	201	676	876	1e-110	398
Ps001215	Unigene0020381	98.3	176	3	0	1	176	221	46	1e-91	335
Ps001216	Unigene0014423	98.99	199	2	0	1	199	310	508	4e-108	390
Ps001217	Unigene0047706	99.01	202	1	1	1	201	395	194	2e-89	328
Ps001218	Unigene0046127	99	201	2	0	1	201	608	808	8e-106	383
Ps001219	Unigene0086968	98.51	201	3	0	1	201	1586	1386	1e-106	385
Ps001220	Unigene0004009	98.48	198	3	0	4	201	67	264	2e-106	384
Ps001221	Unigene0042804	99	201	2	0	1	201	174	374	5e-109	393
Ps001222	Unigene0003624	99.5	201	1	0	1	201	970	770	3e-108	391
Ps001223	Unigene0010193	100	201	0	0	1	201	199	399	1e-110	398
Ps001224	Unigene0041280	98.02	101	2	0	101	201	197	297	4e-49	194
Ps001225	Unigene0041425	98.01	201	4	0	1	201	1778	1978	9e-106	382
Ps001226	Unigene0050998	99	201	2	0	1	201	194	394	2e-107	388
Ps001227	Unigene0039639	95.6	182	5	2	18	199	1136	1314	2e-80	298
Ps001228	Unigene0042028	100	201	0	0	1	201	722	922	1e-110	398
Ps001230	Unigene0010990	99	201	2	0	1	201	1030	1230	8e-106	383
Ps001231	Unigene0027049	99	201	2	0	1	201	497	697	8e-106	383
Ps001232	Unigene0040076	93.79	145	9	0	57	201	615	471	1e-55	216
Ps001233	Unigene0045807	100	201	0	0	1	201	318	518	1e-110	398
Ps001234	Unigene0043687	99.5	201	1	0	1	201	1606	1406	3e-108	391
Ps001235	Unigene0007958	99.5	201	1	0	1	201	1575	1775	3e-108	391
Ps001236	Unigene0027037	99.5	201	1	0	1	201	436	236	3e-108	391
Ps001237	Unigene0015968	99.5	201	1	0	1	201	655	855	3e-108	391
Ps001238	Unigene0045510	99.5	201	1	0	1	201	466	666	3e-108	391
Ps001239	Unigene0019424	98.48	197	2	1	1	197	196	1	3e-100	364
Ps001240	Unigene0043124	99	201	2	0	1	201	298	98	2e-107	388
Ps001241	Unigene0011712	99.5	201	1	0	1	201	641	441	3e-108	391
Ps001242	Unigene0027790	90.43	188	18	0	14	201	240	427	1e-68	259
Ps001243	Unigene0045880	100	201	0	0	1	201	535	735	1e-110	398
Ps001244	Unigene0048616	98.51	201	3	0	1	201	799	999	1e-106	385
Ps001245	Unigene0017343	100	201	0	0	1	201	229	29	1e-110	398
Ps001246	Unigene0014700	85.45	110	16	0	76	185	717	826	4e-18	91.7
Ps001247	Unigene0041912	99.5	201	1	0	1	201	499	299	8e-110	396
Ps001248	Unigene0016730	99.5	201	1	0	1	201	265	465	3e-108	391
Ps001249	Unigene0042074	99.5	201	1	0	1	201	743	943	3e-108	391
Ps001250	Unigene0050307	100	201	0	0	1	201	332	132	1e-110	398
Ps001251	Unigene0049811	99	201	2	0	1	201	381	581	8e-106	383
Ps001252	Unigene0042534	99	201	2	0	1	201	1580	1780	2e-107	388
Ps001253	Unigene0081693	99.5	201	1	0	1	201	1834	1634	8e-110	396
Ps001254	Unigene0030582	85.71	119	17	0	6	124	343	461	4e-21	101
Ps001255	Unigene0010897	100	201	0	0	1	201	530	730	1e-110	398
Ps001256	Unigene0008566	99	201	2	0	1	201	206	406	2e-107	388
Ps001257	Unigene0048542	99	201	2	0	1	201	1159	959	8e-106	383
Ps001258	Unigene0041679	98.51	201	3	0	1	201	377	577	5e-105	380
Ps001260	Unigene0003846	99.5	201	1	0	1	201	413	613	3e-108	391
Ps001261	Unigene0086302	98.02	202	3	1	1	201	338	137	3e-99	361
Ps001262	Unigene0043885	100	201	0	0	1	201	525	325	5e-98	357
Ps001263	Unigene0045497	99.5	201	1	0	1	201	951	1151	3e-108	391
Ps001264	Unigene0003444	98.51	201	3	0	1	201	726	926	4e-108	390
Ps001265	Unigene0047962	99	201	2	0	1	201	1474	1674	2e-107	388
Ps001266	Unigene0043012	100	201	0	0	1	201	808	1008	1e-110	398
Ps001267	Unigene0046969	83.74	123	20	0	38	160	1002	880	3e-16	85.7
Ps001268	Unigene0043466	99	201	2	0	1	201	1237	1037	2e-107	388
Ps001269	Unigene0008828	99	201	2	0	1	201	1581	1781	2e-107	388
Ps001270	Unigene0045013	97.01	201	6	0	1	201	977	777	8e-98	356
Ps001271	Unigene0042197	98.92	185	1	1	17	201	1402	1219	6e-95	346
Ps001272	Unigene0043391	99.5	201	1	0	1	201	316	116	3e-108	391
Ps001273	Unigene0041632	99.5	201	1	0	1	201	893	693	3e-108	391
Ps001274	Unigene0044038	99	201	2	0	1	201	305	105	2e-107	388
Ps001275	Unigene0026298	99.5	200	1	0	1	200	200	1	1e-107	389
Ps001276	Unigene0042380	98.51	201	3	0	1	201	99	299	1e-106	385
Ps001277	Unigene0082323	97.51	201	5	0	1	201	856	656	6e-105	380
Ps001278	Unigene0042013	99	201	2	0	1	201	495	295	2e-107	388
Ps001279	Unigene0036843	98.51	201	3	0	1	201	529	729	1e-106	385
Ps001280	Unigene0006916	98.51	201	3	0	1	201	644	444	1e-106	385
Ps001281	Unigene0042792	99.5	201	1	0	1	201	635	435	3e-108	391
Ps001282	Unigene0044984	99.5	201	1	0	1	201	334	534	3e-108	391
Ps001283	Unigene0045685	99	201	2	0	1	201	18	218	2e-107	388
Ps001284	Unigene0022154	100	201	0	0	1	201	897	697	1e-110	398
Ps001285	Unigene0041471	99.5	201	1	0	1	201	411	611	3e-108	391
Ps001286	Unigene0048124	99.5	201	1	0	1	201	324	524	3e-108	391
Ps001287	Unigene0009152	98.01	201	2	1	1	201	1812	2010	8e-101	366
Ps001288	Unigene0014441	100	170	0	0	32	201	89	258	4e-92	337
Ps001289	Unigene0049973	99.5	201	1	0	1	201	263	63	3e-108	391
Ps001290	Unigene0059211	98.88	179	2	0	1	179	1246	1424	9e-96	349
Ps001291	Unigene0046544	99.5	201	1	0	1	201	576	376	3e-108	391
Ps001292	Unigene0008453	99	201	2	0	1	201	585	785	2e-107	388
Ps001293	Unigene0057612	99.5	201	1	0	1	201	189	389	8e-110	396
Ps001294	Unigene0044955	99.5	201	1	0	1	201	151	351	3e-108	391
Ps001295	Unigene0003766	98.51	201	3	0	1	201	477	677	5e-105	380
Ps001296	Unigene0042830	96.52	201	7	0	1	201	28	228	3e-103	374
Ps001297	Unigene0046214	98.51	201	3	0	1	201	1155	955	2e-103	375
Ps001298	Unigene0041549	99.5	201	1	0	1	201	406	206	8e-110	396
Ps001300	Unigene0045781	100	201	0	0	1	201	386	186	1e-110	398
Ps001301	Unigene0044385	99	201	1	1	1	201	335	136	5e-105	380
Ps001302	Unigene0011430	98.51	201	3	0	1	201	1393	1193	4e-108	390
Ps001303	Unigene0008373	100	201	0	0	1	201	323	523	1e-110	398
Ps001304	Unigene0045068	100	201	0	0	1	201	230	30	1e-110	398
Ps001305	Unigene0046304	98.85	174	2	0	28	201	33	206	1e-89	329
Ps001306	Unigene0041469	99	201	2	0	1	201	129	329	8e-106	383
Ps001307	Unigene0060335	99.5	201	1	0	1	201	602	402	8e-110	396
Ps001308	Unigene0010119	95.02	201	10	0	1	201	211	411	4e-99	360
Ps001309	Unigene0049066	98.51	201	3	0	1	201	296	496	1e-106	385
Ps001310	Unigene0047629	99.5	201	1	0	1	201	711	911	8e-110	396
Ps001311	Unigene0062358	99.5	201	1	0	1	201	120	320	3e-108	391
Ps001312	Unigene0049291	99.5	201	1	0	1	201	436	236	3e-108	391
Ps001313	Unigene0041548	100	201	0	0	1	201	524	724	1e-110	398
Ps001314	Unigene0053766	99	201	1	1	1	201	396	595	2e-103	375
Ps001315	Unigene0045202	99.45	183	1	0	19	201	1167	985	2e-97	355
Ps001316	Unigene0047990	98.51	201	3	0	1	201	1636	1836	2e-103	375
Ps001317	Unigene0046031	98.01	201	4	0	1	201	1098	898	9e-106	382
Ps001318	Unigene0086415	99.5	201	1	0	1	201	3915	3715	8e-110	396
Ps001319	Unigene0041491	99.5	201	1	0	1	201	194	394	8e-110	396
Ps001320	Unigene0019002	99.5	201	1	0	1	201	113	313	8e-110	396
Ps001321	Unigene0004985	98	200	4	0	1	200	806	1005	5e-102	370
Ps001322	Unigene0003605	99	201	2	0	1	201	755	955	2e-107	388
Ps001323	Unigene0019200	99.19	124	1	0	1	124	1518	1395	3e-62	238
Ps001324	Unigene0042516	98.01	201	4	0	1	201	669	469	3e-104	377
Ps001325	Unigene0008515	99	201	1	1	1	201	796	995	5e-105	380
Ps001326	Unigene0027932	91.07	112	10	0	1	112	1193	1304	3e-35	148
Ps001327	Unigene0042711	99.5	201	1	0	1	201	61	261	8e-110	396
Ps001328	Unigene0041687	99	201	2	0	1	201	173	373	8e-106	383
Ps001329	Unigene0047309	97.47	198	5	0	1	198	73	270	6e-100	363
Ps001330	Unigene0012378	98.51	201	3	0	1	201	990	790	1e-106	385
Ps001332	Unigene0019541	99	201	2	0	1	201	602	802	2e-107	388
Ps001333	Unigene0043137	99	201	2	0	1	201	462	262	5e-109	393
Ps001334	Unigene0047096	99.5	201	1	0	1	201	103	303	8e-110	396
Ps001335	Unigene0005417	99	201	2	0	1	201	346	146	2e-107	388
Ps001336	Unigene0043549	98.51	201	3	0	1	201	537	737	1e-106	385
Ps001337	Unigene0004117	98.01	201	4	0	1	201	1102	902	2e-83	308
Ps001338	Unigene0083657	100	201	0	0	1	201	1065	1265	1e-110	398
Ps001339	Unigene0034213	100	100	0	0	1	100	349	448	2e-50	199
Ps001340	Unigene0048872	84.82	191	29	0	9	199	243	433	2e-31	135
Ps001341	Unigene0041397	99.5	201	1	0	1	201	1075	1275	8e-110	396
Ps001342	Unigene0041928	97.38	191	2	1	11	201	1	188	5e-93	340
Ps001343	Unigene0042435	100	201	0	0	1	201	816	616	1e-110	398
Ps001344	Unigene0004221	98.45	194	3	0	8	201	1965	2158	2e-102	371
Ps001345	Unigene0045762	99.5	201	1	0	1	201	321	121	3e-108	391
Ps001347	Unigene0044175	99	201	2	0	1	201	663	463	8e-106	383
Ps001348	Unigene0041240	99.5	201	1	0	1	201	390	590	3e-108	391
Ps001349	Unigene0030581	87.73	163	20	0	1	163	266	104	2e-41	169
Ps001350	Unigene0027791	85.71	196	28	0	6	201	822	627	5e-48	191
Ps001351	Unigene0039247	99	201	2	0	1	201	54	254	8e-106	383
Ps001352	Unigene0037441	97.51	201	5	0	1	201	749	549	2e-106	385
Ps001353	Unigene0033172	99.5	201	1	0	1	201	546	346	1e-95	349
Ps001354	Unigene0002638	99.5	201	1	0	1	201	584	384	8e-110	396
Ps001356	Unigene0043010	97.51	201	5	0	1	201	752	952	2e-103	374
Ps001358	Unigene0043515	98.51	201	3	0	1	201	459	659	5e-105	380
Ps001359	Unigene0018581	97.51	201	5	0	1	201	146	346	8e-72	270
Ps001360	Unigene0008772	99	201	2	0	1	201	272	472	8e-106	383
Ps001361	Unigene0051873	100	201	0	0	1	201	482	282	1e-110	398
Ps001363	Unigene0043170	97.51	201	5	0	1	201	800	600	6e-105	380
Ps001364	Unigene0085292	97.01	201	6	0	1	201	1049	1249	4e-104	377
Ps001365	Unigene0034695	93.84	146	2	1	1	146	217	355	6e-59	227
Ps001366	Unigene0004802	99	201	2	0	1	201	1346	1146	2e-107	388
Ps001367	Unigene0004256	99.5	201	0	1	1	201	144	343	8e-106	383
Ps001368	Unigene0016401	100	201	0	0	1	201	2087	2287	1e-110	398
Ps001370	Unigene0041443	99	201	2	0	1	201	1037	837	8e-106	383
Ps001371	Unigene0041565	98.01	201	4	0	1	201	311	511	5e-101	367
Ps001372	Unigene0004031	96.26	187	5	2	16	202	11	195	6e-89	327
Ps001373	Unigene0018482	98	200	4	0	2	201	1400	1599	3e-88	324
Ps001374	Unigene0047056	98.01	201	4	0	1	201	1015	815	9e-106	382
Ps001375	Unigene0046557	99.38	161	1	0	41	201	88	248	7e-86	316
Ps001376	Unigene0021506	90.91	176	16	0	1	176	2380	2555	6e-59	227
Ps001377	Unigene0043027	98.01	201	4	0	1	201	63	263	3e-104	377
Ps001378	Unigene0004461	97.51	201	5	0	1	201	575	375	3e-100	364
Ps001380	Unigene0045804	98.55	138	1	1	1	138	140	4	3e-66	251
Ps001381	Unigene0003010	98.01	201	4	0	1	201	1246	1446	9e-106	382
Ps001382	Unigene0042503	99.5	201	1	0	1	201	284	84	8e-110	396
Ps001383	Unigene0030322	94.53	201	11	0	1	201	245	445	8e-86	316
Ps001384	Unigene0045569	98.01	201	4	0	1	201	446	646	9e-106	382
Ps001385	Unigene0004558	99.5	201	1	0	1	201	2317	2517	3e-108	391
Ps001386	Unigene0043242	97.49	199	5	0	3	201	985	1183	2e-97	355
Ps001387	Unigene0041820	99.5	201	1	0	1	201	833	633	8e-110	396
Ps001388	Unigene0042999	99.5	201	1	0	1	201	220	420	3e-108	391
Ps001389	Unigene0041838	98.5	200	3	0	2	201	824	1023	2e-106	384
Ps001390	Unigene0049159	95.02	201	10	0	1	201	841	1041	1e-86	319
Ps001392	Unigene0020484	93.02	129	9	0	43	171	1	129	1e-47	190
Ps001393	Unigene0049610	98.01	201	4	0	1	201	259	459	9e-106	382
Ps001394	Unigene0082585	99.5	201	1	0	1	201	113	313	8e-110	396
Ps001395	Unigene0014195	97.84	185	4	0	1	185	660	844	1e-94	345
Ps001396	Unigene0021403	99.5	201	1	0	1	201	935	1135	8e-110	396
Ps001397	Unigene0007952	98.04	204	1	3	1	201	215	418	3e-97	354
Ps001398	Unigene0007114	99.5	201	1	0	1	201	835	1035	3e-108	391
Ps001400	Unigene0052640	99.3	143	1	0	1	143	412	554	1e-73	276
Ps001401	Unigene0041423	99	201	2	0	1	201	510	710	2e-107	388
Ps001402	Unigene0027790	84.02	194	31	0	5	198	279	472	2e-32	139
Ps001403	Unigene0004409	99.5	201	1	0	1	201	1168	968	3e-108	391
Ps001404	Unigene0041367	99	201	2	0	1	201	774	974	5e-109	393
Ps001405	Unigene0022584	92.54	201	1	1	1	201	690	876	4e-80	297
Ps001406	Unigene0012402	99.5	201	1	0	1	201	1242	1042	3e-108	391
Ps001407	Unigene0045113	99.5	201	1	0	1	201	915	1115	3e-108	391
Ps001408	Unigene0009618	82.9	193	33	0	1	193	1208	1016	5e-27	121
Ps001409	Unigene0018223	98.51	201	3	0	1	201	1580	1380	2e-103	375
Ps001410	Unigene0012337	98.51	201	3	0	1	201	1289	1089	1e-106	385
Ps001411	Unigene0005064	99.5	201	1	0	1	201	1603	1803	3e-108	391
Ps001412	Unigene0044939	98.01	201	4	0	1	201	113	313	1e-102	372
Ps001413	Unigene0034261	99	201	2	0	1	201	518	318	8e-106	383
Ps001414	Unigene0005259	100	201	0	0	1	201	731	531	1e-110	398
Ps001415	Unigene0048842	99	201	2	0	1	201	985	785	2e-107	388
Ps001416	Unigene0043971	100	201	0	0	1	201	741	541	1e-110	398
Ps001417	Unigene0010871	98.51	201	3	0	1	201	1446	1246	2e-103	375
Ps001418	Unigene0036393	99	201	2	0	1	201	208	408	8e-106	383
Ps001419	Unigene0042095	99.5	201	1	0	1	201	756	956	3e-108	391
Ps001420	Unigene0003997	100	201	0	0	1	201	228	428	1e-110	398
Ps001421	Unigene0042855	99.5	201	1	0	1	201	1597	1397	3e-108	391
Ps001422	Unigene0005879	97.51	201	5	0	1	201	1326	1126	2e-103	374
Ps001423	Unigene0042440	99	201	2	0	1	201	1323	1523	2e-107	388
Ps001424	Unigene0032143	99.5	201	1	0	1	201	733	533	3e-108	391
Ps001425	Unigene0007616	99.5	201	1	0	1	201	518	718	8e-110	396
Ps001426	Unigene0086029	99	201	2	0	1	201	567	767	2e-107	388
Ps001427	Unigene0008150	99.5	199	1	0	1	199	2244	2046	2e-107	388
Ps001429	Unigene0086552	100	201	0	0	1	201	479	279	1e-110	398
Ps001430	Unigene0021044	95.52	201	9	0	1	201	722	522	3e-95	348
Ps001431	Unigene0029005	99	201	2	0	1	201	71	271	2e-107	388
Ps001432	Unigene0044616	99	200	0	2	1	200	1221	1418	2e-100	365
Ps001433	Unigene0020615	98.51	201	3	0	1	201	821	1021	4e-108	390
Ps001434	Unigene0043365	99.5	201	1	0	1	201	267	67	3e-108	391
Ps001436	Unigene0037295	97.51	201	5	0	1	201	463	663	2e-103	374
Ps001437	Unigene0025000	100	120	0	0	82	201	284	165	3e-62	238
Ps001438	Unigene0012973	100	201	0	0	1	201	992	792	1e-110	398
Ps001439	Unigene0048296	100	167	0	0	1	167	167	1	3e-90	331
Ps001441	Unigene0041973	97.51	201	1	4	1	201	865	1061	4e-89	327
Ps001442	Unigene0045552	98.51	201	3	0	1	201	574	774	4e-108	390
Ps001443	Unigene0043917	98.51	201	2	1	1	201	372	173	1e-102	372
Ps001444	Unigene0003922	98.99	199	2	0	3	201	1361	1559	9e-108	389
Ps001445	Unigene0046474	99.5	201	1	0	1	201	87	287	3e-108	391
Ps001446	Unigene0041900	99	201	2	0	1	201	419	619	2e-107	388
Ps001447	Unigene0024552	100	201	0	0	1	201	1594	1794	1e-110	398
Ps001448	Unigene0005104	99	201	2	0	1	201	369	569	5e-109	393
Ps001449	Unigene0033514	99.5	201	1	0	1	201	251	51	8e-110	396
Ps001450	Unigene0041532	99.5	201	1	0	1	201	604	404	3e-108	391
Ps001451	Unigene0043934	99.5	201	1	0	1	201	411	611	3e-108	391
Ps001452	Unigene0054912	97.03	202	5	1	1	201	181	382	4e-99	360
Ps001453	Unigene0046973	100	201	0	0	1	201	1164	1364	1e-110	398
Ps001454	Unigene0009829	98.51	201	3	0	1	201	1234	1034	2e-105	381
Ps001455	Unigene0047254	98.51	201	3	0	1	201	2279	2079	5e-105	380
Ps001456	Unigene0037968	98.01	201	4	0	1	201	836	636	9e-106	382
Ps001457	Unigene0043961	100	201	0	0	1	201	408	208	1e-110	398
Ps001458	Unigene0062464	99	201	2	0	1	201	562	362	5e-109	393
Ps001459	Unigene0007365	98.86	176	2	0	26	201	897	722	2e-92	338
Ps001460	Unigene0039643	95.65	161	7	0	41	201	893	733	1e-77	289
Ps001462	Unigene0018223	86.36	176	24	0	1	176	479	304	1e-39	163
Ps001463	Unigene0043544	99.5	201	1	0	1	201	1788	1588	3e-108	391
Ps001464	Unigene0041843	100	201	0	0	1	201	590	790	1e-110	398
Ps001465	Unigene0003828	98.01	201	4	0	1	201	336	536	9e-106	382
Ps001466	Unigene0039737	99.5	201	1	0	1	201	1201	1001	8e-110	396
Ps001467	Unigene0008951	98.82	169	2	0	33	201	298	130	1e-86	319
Ps001468	Unigene0044780	98.51	201	3	0	1	201	368	168	4e-108	390
Ps001469	Unigene0046402	99.5	201	1	0	1	201	629	429	8e-110	396
Ps001470	Unigene0046005	99	201	2	0	1	201	379	179	5e-109	393
Ps001471	Unigene0043157	98.84	172	2	0	30	201	179	350	5e-90	330
Ps001472	Unigene0011456	99.5	201	1	0	1	201	120	320	8e-110	396
Ps001473	Unigene0010063	100	201	0	0	1	201	776	576	1e-110	398
Ps001474	Unigene0043601	100	124	0	0	1	124	1703	1826	1e-64	246
Ps001475	Unigene0004514	99.5	201	1	0	1	201	1876	1676	3e-108	391
Ps001477	Unigene0026759	96.52	201	7	0	1	201	321	521	2e-95	348
Ps001478	Unigene0020412	99	201	1	1	1	201	867	668	5e-73	274
Ps001479	Unigene0041555	99.5	201	1	0	1	201	440	640	3e-108	391
Ps001480	Unigene0036435	96.06	203	6	1	1	201	314	112	4e-97	354
Ps001481	Unigene0049159	94.44	198	8	1	4	198	85	282	2e-84	311
Ps001482	Unigene0044133	98.94	188	2	0	1	188	478	291	1e-99	362
Ps001483	Unigene0041930	97.51	201	5	0	1	201	1040	1240	2e-103	374
Ps001484	Unigene0085186	98.51	201	2	1	1	201	27	226	1e-102	372
Ps001486	Unigene0042231	99.5	201	1	0	1	201	894	694	3e-108	391
Ps001487	Unigene0023172	99	201	2	0	1	201	946	1146	8e-106	383
Ps001489	Unigene0077794	99.5	201	1	0	1	201	217	17	8e-110	396
Ps001490	Unigene0035541	99	201	2	0	1	201	810	1010	5e-109	393
Ps001491	Unigene0059111	99.47	189	1	0	13	201	1	189	1e-102	372
Ps001492	Unigene0044745	100	201	0	0	1	201	886	1086	1e-110	398
Ps001494	Unigene0011390	100	201	0	0	1	201	1069	1269	1e-110	398
Ps001495	Unigene0079535	99.12	113	1	0	1	113	113	1	1e-55	216
Ps001496	Unigene0041870	98	100	2	0	102	201	102	201	5e-47	187
Ps001497	Unigene0025188	98.51	201	3	0	1	201	248	448	1e-106	385
Ps001498	Unigene0044878	100	171	0	0	1	171	479	309	1e-92	339
Ps001499	Unigene0058427	98.41	189	3	0	13	201	387	199	8e-103	373
Ps001500	Unigene0042315	100	201	0	0	1	201	707	507	1e-110	398
Ps001501	Unigene0008582	99.05	105	1	0	41	145	1209	1313	6e-51	200
Ps001502	Unigene0061544	99.21	126	1	0	76	201	1052	927	1e-63	243
Ps001503	Unigene0044443	99.15	117	1	0	1	117	244	128	1e-59	229
Ps001504	Unigene0042291	98.01	201	4	0	1	201	1963	1763	9e-106	382
Ps001505	Unigene0045393	99	201	2	0	1	201	920	1120	5e-109	393
Ps001506	Unigene0083499	99	201	2	0	1	201	356	556	2e-107	388
Ps001507	Unigene0009746	99.5	201	1	0	1	201	738	938	8e-110	396
Ps001508	Unigene0043208	99	100	1	0	102	201	748	649	2e-49	195
Ps001509	Unigene0041973	99	201	2	0	1	201	393	193	2e-107	388
Ps001510	Unigene0017370	100	201	0	0	1	201	452	252	1e-110	398
Ps001511	Unigene0004283	99	201	2	0	1	201	117	317	8e-106	383
Ps001512	Unigene0044005	99.5	201	1	0	1	201	247	447	8e-110	396
Ps001513	Unigene0084777	80	200	37	1	4	200	767	568	1e-14	80
Ps001514	Unigene0018659	99.5	201	1	0	1	201	1857	2057	8e-110	396
Ps001515	Unigene0045016	99	201	2	0	1	201	695	895	5e-109	393
Ps001516	Unigene0044931	98.51	201	3	0	1	201	272	72	5e-105	380
Ps001517	Unigene0043231	100	201	0	0	1	201	1832	2032	1e-110	398
Ps001518	Unigene0041302	99.5	199	1	0	3	201	554	356	5e-109	393
Ps001519	Unigene0030324	98.01	201	4	0	1	201	450	650	5e-101	367
Ps001520	Unigene0086985	99	201	2	0	1	201	673	473	2e-107	388
Ps001521	Unigene0018561	99	201	2	0	1	201	2138	1938	2e-107	388
Ps001522	Unigene0009894	99.5	201	1	0	1	201	1174	974	3e-108	391
Ps001523	Unigene0043138	94.03	201	12	0	1	201	421	621	2e-83	308
Ps001524	Unigene0010602	99.5	201	1	0	1	201	410	210	3e-108	391
Ps001525	Unigene0050932	99	201	2	0	1	201	4	204	2e-107	388
Ps001526	Unigene0048011	99	100	1	0	102	201	602	503	2e-49	195
Ps001528	Unigene0084503	98.51	201	3	0	1	201	288	88	1e-106	385
Ps001529	Unigene0042250	100	201	0	0	1	201	2037	1837	1e-110	398
Ps001530	Unigene0031926	99	201	2	0	1	201	1175	975	8e-106	383
Ps001531	Unigene0083461	99.5	201	1	0	1	201	212	412	8e-110	396
Ps001532	Unigene0027791	98.51	201	3	0	1	201	492	692	5e-105	380
Ps001533	Unigene0041317	99.39	165	1	0	1	165	2264	2428	3e-88	324
Ps001534	Unigene0043902	99.5	201	1	0	1	201	656	456	3e-108	391
Ps001535	Unigene0006350	99.5	201	1	0	1	201	1067	867	3e-97	354
Ps001536	Unigene0007758	100	172	0	0	30	201	1	172	3e-93	341
Ps001537	Unigene0004541	99.5	201	1	0	1	201	2577	2377	3e-108	391
Ps001538	Unigene0043945	99	201	2	0	1	201	1095	895	5e-109	393
Ps001539	Unigene0042095	100	201	0	0	1	201	956	756	1e-110	398
Ps001540	Unigene0006244	99.5	201	1	0	1	201	1418	1218	8e-110	396
Ps001541	Unigene0020889	100	201	0	0	1	201	1732	1532	5e-98	357
Ps001542	Unigene0083747	99	201	2	0	1	201	2340	2140	2e-107	388
Ps001543	Unigene0019005	99	201	2	0	1	201	930	1130	2e-107	388
Ps001544	Unigene0047256	99	201	2	0	1	201	74	274	8e-106	383
Ps001545	Unigene0006858	100	201	0	0	1	201	256	56	1e-110	398
Ps001546	Unigene0005688	99.48	194	1	0	1	194	253	60	5e-104	377
Ps001547	Unigene0030108	100	201	0	0	1	201	333	133	1e-110	398
Ps001548	Unigene0041424	97.03	202	4	2	1	201	646	846	4e-95	347
Ps001549	Unigene0048987	99	201	2	0	1	201	699	499	8e-106	383
Ps001550	Unigene0045968	99.5	201	1	0	1	201	571	771	3e-108	391
Ps001551	Unigene0062464	99	201	2	0	1	201	249	449	2e-107	388
Ps001552	Unigene0048723	98.91	183	2	0	1	183	667	485	1e-96	352
Ps001553	Unigene0045811	99	201	0	2	3	201	21	221	2e-88	325
Ps001554	Unigene0004109	99.5	201	1	0	1	201	427	227	8e-110	396
Ps001555	Unigene0041343	99.5	201	1	0	1	201	576	776	8e-110	396
Ps001557	Unigene0027790	98.01	201	4	0	1	201	574	774	9e-106	382
Ps001558	Unigene0058453	99	201	2	0	1	201	503	703	2e-107	388
Ps001560	Unigene0044940	98.84	173	2	0	29	201	1832	1660	1e-90	332
Ps001561	Unigene0043239	99	201	2	0	1	201	1344	1544	2e-107	388
Ps001562	Unigene0007912	99.5	199	1	0	3	201	1042	844	5e-107	387
Ps001563	Unigene0048128	100	201	0	0	1	201	408	208	1e-110	398
Ps001564	Unigene0062266	98.17	164	3	0	1	164	165	2	9e-72	270
Ps001565	Unigene0044635	99.5	201	1	0	1	201	568	368	3e-108	391
Ps001566	Unigene0044462	99	201	2	0	1	201	513	313	8e-106	383
Ps001567	Unigene0004832	100	201	0	0	1	201	339	139	1e-110	398
Ps001568	Unigene0083991	100	201	0	0	1	201	1878	2078	1e-110	398
Ps001569	Unigene0045006	99.5	201	1	0	1	201	1155	1355	8e-110	396
Ps001570	Unigene0046763	99	201	1	1	1	201	1295	1096	2e-103	375
Ps001571	Unigene0027932	86.98	192	25	0	8	199	1295	1104	3e-48	192
Ps001572	Unigene0041470	98.46	195	3	0	1	195	1224	1418	2e-101	368
Ps001573	Unigene0047728	97.54	122	3	0	80	201	118	239	7e-61	233
Ps001574	Unigene0028632	98.02	202	3	1	1	201	347	548	8e-101	366
Ps001575	Unigene0017423	100	201	0	0	1	201	785	585	1e-110	398
Ps001576	Unigene0041402	99.5	201	1	0	1	201	814	1014	8e-110	396
Ps001577	Unigene0048715	83.45	139	21	2	64	201	237	374	2e-16	86.3
Ps001578	Unigene0047962	99.5	201	1	0	1	201	1038	1238	3e-108	391
Ps001579	Unigene0050945	99.35	154	1	0	1	154	154	1	4e-80	297
Ps001580	Unigene0045199	97.46	118	3	0	84	201	828	711	6e-57	220
Ps001581	Unigene0043638	98.51	201	2	1	1	201	1358	1159	1e-102	372
Ps001582	Unigene0084101	99.5	201	1	0	1	201	217	17	8e-110	396
Ps001583	Unigene0018875	99	201	2	0	1	201	286	486	8e-106	383
Ps001584	Unigene0007099	98.35	121	2	0	81	201	1	121	4e-58	224
Ps001585	Unigene0037421	99.5	201	1	0	1	201	233	433	3e-108	391
Ps001587	Unigene0042201	99	201	2	0	1	201	1530	1730	2e-107	388
Ps001588	Unigene0087015	99.5	201	1	0	1	201	1303	1103	3e-108	391
Ps001589	Unigene0041892	100	201	0	0	1	201	805	1005	1e-110	398
Ps001590	Unigene0043629	99.21	127	1	0	1	127	223	97	5e-64	244
Ps001591	Unigene0004362	99.5	201	1	0	1	201	907	1107	3e-108	391
Ps001592	Unigene0048065	99	201	2	0	1	201	954	1154	2e-107	388
Ps001593	Unigene0045378	100	105	0	0	1	105	981	877	1e-53	209
Ps001594	Unigene0055805	97.51	201	5	0	1	201	132	332	9e-102	369
Ps001596	Unigene0084520	99.5	201	1	0	1	201	617	417	3e-108	391
Ps001597	Unigene0044080	99.5	201	1	0	1	201	1161	1361	3e-108	391
Ps001598	Unigene0027793	98.51	201	3	0	1	201	797	597	4e-108	390
Ps001599	Unigene0030323	97.46	197	5	0	1	197	213	409	4e-104	377
Ps001600	Unigene0001972	99	201	2	0	1	201	682	482	5e-109	393
Ps001601	Unigene0023193	87.23	188	24	0	12	199	239	426	6e-46	184
Ps001603	Unigene0042350	97.97	197	4	0	1	197	813	1009	9e-103	372
Ps001604	Unigene0045103	99	201	2	0	1	201	1562	1362	2e-107	388
Ps001605	Unigene0046721	100	201	0	0	1	201	652	852	1e-110	398
Ps001607	Unigene0038094	98.82	170	2	0	32	201	223	54	7e-89	326
Ps001608	Unigene0042751	98.01	201	4	0	1	201	1434	1634	1e-102	372
Ps001609	Unigene0030324	98.51	201	3	0	1	201	450	650	2e-103	375
Ps001610	Unigene0084161	98.01	201	4	0	1	201	384	584	3e-104	377
Ps001611	Unigene0009558	97.51	201	5	0	1	201	277	77	6e-105	380
Ps001612	Unigene0002693	99.2	125	1	0	1	125	418	542	7e-63	240
Ps001613	Unigene0004142	99.5	201	1	0	1	201	218	418	3e-108	391
Ps001614	Unigene0023177	98.51	201	3	0	1	201	1799	1599	1e-106	385
Ps001615	Unigene0014461	98.51	201	3	0	1	201	734	534	4e-108	390
Ps001616	Unigene0031198	91.18	170	15	0	1	170	49	218	3e-56	218
Ps001617	Unigene0044000	99.5	201	1	0	1	201	834	1034	8e-110	396
Ps001618	Unigene0041206	97.51	201	5	0	1	201	1683	1883	3e-100	364
Ps001619	Unigene0016921	99	201	2	0	1	201	1269	1469	2e-107	388
Ps001620	Unigene0028593	99	201	2	0	1	201	24	224	8e-106	383
Ps001621	Unigene0053966	99	201	2	0	1	201	593	393	5e-109	393
Ps001623	Unigene0041734	98.51	201	3	0	1	201	250	450	5e-105	380
Ps001624	Unigene0083022	99	201	2	0	1	201	1062	862	2e-107	388
Ps001625	Unigene0006674	97.99	199	4	0	1	199	863	1061	6e-105	380
Ps001626	Unigene0043077	100	201	0	0	1	201	528	728	1e-110	398
Ps001627	Unigene0040916	99.5	201	1	0	1	201	966	766	8e-110	396
Ps001628	Unigene0041979	100	143	0	0	1	143	238	380	5e-76	283
Ps001629	Unigene0043390	99	201	2	0	1	201	640	440	5e-109	393
Ps001630	Unigene0009595	100	201	0	0	1	201	1902	2102	1e-110	398
Ps001631	Unigene0082323	97.01	201	6	0	1	201	950	750	2e-102	372
Ps001632	Unigene0004829	99.5	201	1	0	1	201	660	460	3e-108	391
Ps001633	Unigene0004888	99.47	188	1	0	1	188	188	1	5e-102	370
Ps001634	Unigene0084216	98.51	201	3	0	1	201	1098	1298	1e-106	385
Ps001635	Unigene0009861	94.53	201	11	0	1	201	1311	1511	3e-98	357
Ps001636	Unigene0007757	97.01	201	6	0	1	201	1258	1058	1e-105	382
Ps001637	Unigene0030315	97.4	192	5	0	1	192	924	733	1e-99	362
Ps001638	Unigene0083695	100	201	0	0	1	201	207	407	1e-110	398
Ps001639	Unigene0009981	99.5	201	1	0	1	201	1221	1021	3e-108	391
Ps001640	Unigene0008074	98.51	201	3	0	1	201	573	773	5e-105	380
Ps001641	Unigene0048227	100	196	0	0	6	201	812	617	1e-107	389
Ps001642	Unigene0007590	99	201	2	0	1	201	307	107	2e-107	388
Ps001643	Unigene0044384	99.5	201	1	0	1	201	856	656	1e-95	349
Ps001645	Unigene0047024	98.51	201	3	0	1	201	728	528	1e-106	385
Ps001646	Unigene0004114	100	201	0	0	1	201	376	176	1e-110	398
Ps001648	Unigene0014804	97.81	183	4	0	19	201	1160	978	2e-93	341
Ps001649	Unigene0045019	98.99	199	2	0	1	199	747	945	1e-106	385
Ps001650	Unigene0041930	98.51	201	3	0	1	201	511	311	1e-106	385
Ps001651	Unigene0034499	98.51	201	3	0	1	201	233	33	1e-106	385
Ps001652	Unigene0052977	99	201	2	0	1	201	387	187	5e-109	393
Ps001653	Unigene0011596	98.03	203	2	1	1	201	943	1145	2e-88	325
Ps001654	Unigene0041555	99	201	2	0	1	201	682	482	2e-107	388
Ps001655	Unigene0045565	99.5	201	1	0	1	201	687	487	3e-108	391
Ps001656	Unigene0002742	100	201	0	0	1	201	787	987	1e-110	398
Ps001657	Unigene0036531	99.5	201	1	0	1	201	599	399	8e-110	396
Ps001658	Unigene0042929	98.51	201	3	0	1	201	952	1152	1e-106	385
Ps001659	Unigene0041886	99.5	201	0	1	1	201	475	276	8e-106	383
Ps001660	Unigene0037441	96.02	201	8	0	1	201	216	416	2e-102	371
Ps001661	Unigene0020168	99.01	202	1	1	1	201	1286	1487	2e-91	335
Ps001662	Unigene0042067	98.51	201	3	0	1	201	599	399	4e-108	390
Ps001663	Unigene0084268	97.01	201	6	0	1	201	1473	1673	2e-102	372
Ps001664	Unigene0043524	99	201	2	0	1	201	1383	1583	5e-109	393
Ps001668	Unigene0041975	99.5	201	1	0	1	201	596	396	3e-88	324
Ps001669	Unigene0005394	99.25	133	1	0	69	201	571	439	7e-68	257
Ps001670	Unigene0041439	99	201	2	0	1	201	153	353	5e-109	393
Ps001671	Unigene0019006	98.01	201	3	1	1	201	1399	1598	4e-86	317
Ps001672	Unigene0042735	99.5	201	1	0	1	201	897	697	3e-108	391
Ps001673	Unigene0004414	100	138	0	0	64	201	2107	1970	5e-73	274
Ps001674	Unigene0060233	99.01	202	1	1	1	201	204	3	2e-91	335
Ps001675	Unigene0041966	100	201	0	0	1	201	2866	3066	1e-110	398
Ps001676	Unigene0008791	98.01	201	3	1	1	201	2271	2470	1e-87	322
Ps001677	Unigene0004598	100	166	0	0	1	166	166	1	5e-90	330
Ps001678	Unigene0041299	99	201	2	0	1	201	389	589	5e-109	393
Ps001679	Unigene0042817	100	201	0	0	1	201	1326	1526	1e-110	398
Ps001680	Unigene0041418	99.5	199	1	0	3	201	285	483	5e-107	387
Ps001681	Unigene0005160	99.5	201	1	0	1	201	1245	1045	8e-110	396
Ps001682	Unigene0005482	99.5	201	1	0	1	201	382	582	8e-110	396
Ps001683	Unigene0025730	99	201	2	0	1	201	574	374	2e-107	388
Ps001684	Unigene0004353	98.01	201	4	0	1	201	1441	1641	2e-107	388
Ps001685	Unigene0049594	100	201	0	0	1	201	469	269	1e-110	398
Ps001686	Unigene0043082	99.5	201	1	0	1	201	353	553	3e-108	391
Ps001687	Unigene0019496	98.88	179	2	0	21	199	1	179	1e-94	345
Ps001688	Unigene0003747	96.02	201	8	0	1	201	1717	1917	3e-99	361
Ps001689	Unigene0006910	98.51	201	3	0	1	201	264	464	5e-105	380
Ps001690	Unigene0042958	100	191	0	0	11	201	1159	969	1e-104	379
Ps001692	Unigene0003624	99	201	2	0	1	201	524	324	5e-109	393
Ps001693	Unigene0041415	99.5	201	1	0	1	201	447	647	3e-108	391
Ps001694	Unigene0042014	98.02	101	1	1	102	201	68	168	8e-31	134
Ps001695	Unigene0033054	99.5	201	1	0	1	201	1287	1487	3e-108	391
Ps001697	Unigene0045413	100	201	0	0	1	201	914	714	1e-110	398
Ps001698	Unigene0020172	99.37	158	1	0	44	201	93	250	2e-71	269
Ps001699	Unigene0077245	99.5	201	1	0	1	201	79	279	8e-110	396
Ps001701	Unigene0056810	98.01	201	4	0	1	201	462	262	5e-101	367
Ps001702	Unigene0033337	95.68	139	6	0	1	139	967	1105	3e-59	228
Ps001703	Unigene0042508	99	201	2	0	1	201	271	471	2e-107	388
Ps001704	Unigene0016556	100	201	0	0	1	201	611	411	1e-110	398
Ps001706	Unigene0084866	93.53	201	10	1	1	201	110	307	4e-92	337
Ps001708	Unigene0041308	98.51	201	3	0	1	201	2204	2404	4e-108	390
Ps001709	Unigene0083674	97.51	201	5	0	1	201	1972	2172	6e-105	380
Ps001710	Unigene0043469	97.01	201	6	0	1	201	223	423	3e-96	351
Ps001712	Unigene0018366	100	199	0	0	1	199	1010	1208	8e-110	396
Ps001713	Unigene0043840	99.5	201	1	0	1	201	499	299	3e-108	391
Ps001714	Unigene0017705	98.51	201	3	0	1	201	1348	1148	5e-105	380
Ps001715	Unigene0041315	98.01	201	4	0	1	201	240	440	9e-106	382
Ps001716	Unigene0021033	100	201	0	0	1	201	990	1190	1e-110	398
Ps001717	Unigene0084374	99	201	2	0	1	201	1082	882	8e-106	383
Ps001718	Unigene0048681	98.27	173	3	0	1	173	181	9	3e-88	324
Ps001719	Unigene0003956	98.01	201	4	0	1	201	314	114	3e-104	377
Ps001720	Unigene0002419	97.11	173	4	1	1	173	621	450	7e-83	306
Ps001721	Unigene0042570	99.5	201	1	0	1	201	1380	1580	8e-110	396
Ps001722	Unigene0081523	99.5	201	1	0	1	201	3983	4183	3e-108	391
Ps001723	Unigene0019732	99.5	201	1	0	1	201	1138	1338	3e-108	391
Ps001724	Unigene0021695	99.5	201	0	1	1	201	1229	1030	6e-79	293
Ps001725	Unigene0043722	99.13	115	1	0	1	115	1220	1334	2e-58	225
Ps001726	Unigene0004138	99.5	201	1	0	1	201	866	666	8e-110	396
Ps001727	Unigene0048421	99.47	190	1	0	1	190	54	243	3e-103	374
Ps001728	Unigene0045269	99.5	201	1	0	1	201	1190	1390	8e-110	396
Ps001729	Unigene0041427	98.01	201	4	0	1	201	30	230	3e-104	377
Ps001730	Unigene0006522	98.51	201	3	0	1	201	930	730	5e-105	380
Ps001731	Unigene0084503	99.5	201	1	0	1	201	88	288	8e-110	396
Ps001732	Unigene0025640	100	100	0	0	102	201	1049	950	3e-50	198
Ps001733	Unigene0086590	87.15	179	12	2	1	177	365	534	4e-43	174
Ps001734	Unigene0046204	99.5	201	1	0	1	201	1530	1330	3e-108	391
Ps001735	Unigene0005875	99.5	201	1	0	1	201	118	318	3e-108	391
Ps001736	Unigene0014242	99.5	201	1	0	1	201	864	1064	8e-110	396
Ps001737	Unigene0005754	97.51	201	5	0	1	201	259	459	6e-105	380
Ps001738	Unigene0040180	98.51	201	3	0	1	201	251	451	5e-105	380
Ps001739	Unigene0041402	100	201	0	0	1	201	814	1014	1e-110	398
Ps001740	Unigene0013301	98.01	201	4	0	1	201	269	69	1e-102	372
Ps001741	Unigene0010146	100	201	0	0	1	201	318	118	1e-110	398
Ps001742	Unigene0085891	99.5	201	1	0	1	201	2185	2385	8e-110	396
Ps001743	Unigene0082017	99.48	194	1	0	1	194	213	20	5e-104	377
Ps001744	Unigene0046924	97.25	182	3	2	1	182	180	1	1e-82	305
Ps001745	Unigene0042254	98.51	201	3	0	1	201	1835	1635	1e-106	385
Ps001746	Unigene0046072	99	201	2	0	1	201	1662	1462	5e-109	393
Ps001747	Unigene0041952	99.5	201	1	0	1	201	652	452	8e-110	396
Ps001748	Unigene0044158	99.5	201	1	0	1	201	856	656	3e-108	391
Ps001749	Unigene0013108	99.22	128	1	0	1	128	764	891	1e-64	246
Ps001750	Unigene0048799	99	201	2	0	1	201	1267	1067	8e-106	383
Ps001751	Unigene0042043	99.5	201	1	0	1	201	638	438	3e-108	391
Ps001752	Unigene0002016	99.5	201	1	0	1	201	623	823	8e-110	396
Ps001753	Unigene0051294	99	201	2	0	1	201	1639	1839	2e-107	388
Ps001754	Unigene0083078	98.01	201	4	0	1	201	114	314	9e-106	382
Ps001755	Unigene0018269	97.07	205	1	3	1	201	1214	1011	1e-92	339
Ps001756	Unigene0055805	97.01	201	6	0	1	201	132	332	6e-101	366
Ps001757	Unigene0042346	98.51	201	3	0	1	201	1494	1294	2e-103	375
Ps001758	Unigene0036160	99.5	201	1	0	1	201	51	251	3e-108	391
Ps001759	Unigene0010767	99.5	201	1	0	1	201	1149	1349	3e-108	391
Ps001760	Unigene0043108	99	201	2	0	1	201	1190	990	2e-107	388
Ps001761	Unigene0045383	99.5	201	1	0	1	201	937	1137	3e-108	391
Ps001762	Unigene0043339	99.5	201	1	0	1	201	448	648	3e-108	391
Ps001763	Unigene0008783	98.51	201	3	0	1	201	753	953	4e-108	390
Ps001764	Unigene0003902	99.5	201	1	0	1	201	1453	1253	8e-110	396
Ps001765	Unigene0016562	99.5	201	1	0	1	201	599	399	8e-110	396
Ps001766	Unigene0041497	94.76	210	2	1	1	201	645	436	1e-93	342
Ps001767	Unigene0083014	98.44	192	1	1	12	201	113	304	3e-96	351
Ps001768	Unigene0042087	99	201	2	0	1	201	592	792	2e-107	388
Ps001769	Unigene0042493	98.51	201	3	0	1	201	449	249	1e-106	385
Ps001770	Unigene0042679	100	201	0	0	1	201	1895	2095	1e-110	398
Ps001772	Unigene0041964	99.5	201	1	0	1	201	271	471	3e-108	391
Ps001773	Unigene0044218	99	201	2	0	1	201	343	543	2e-107	388
Ps001774	Unigene0042046	100	201	0	0	1	201	387	187	1e-110	398
Ps001775	Unigene0045552	97.51	201	5	0	1	201	471	271	9e-102	369
Ps001776	Unigene0012364	98.01	201	4	0	1	201	295	495	9e-106	382
Ps001777	Unigene0010539	99.48	194	0	1	9	201	1146	1339	1e-101	369
Ps001778	Unigene0020422	99.5	201	1	0	1	201	428	228	3e-108	391
Ps001779	Unigene0009080	100	201	0	0	1	201	552	752	1e-110	398
Ps001780	Unigene0046751	97.51	201	5	0	1	201	509	709	6e-105	380
Ps001781	Unigene0017520	92.18	179	10	1	1	175	188	10	3e-64	244
Ps001782	Unigene0038023	99.5	201	1	0	1	201	514	714	3e-108	391
Ps001783	Unigene0005456	99.07	108	1	0	94	201	1954	1847	1e-52	206
Ps001784	Unigene0039503	99.5	201	1	0	1	201	447	247	3e-108	391
Ps001785	Unigene0044258	99	201	2	0	1	201	403	203	5e-109	393
Ps001786	Unigene0017592	99.5	201	1	0	1	201	1208	1008	3e-108	391
Ps001787	Unigene0015229	99	201	2	0	1	201	1110	910	5e-109	393
Ps001788	Unigene0004032	99	201	0	2	1	201	961	763	5e-101	367
Ps001790	Unigene0004927	99.5	201	1	0	1	201	160	360	8e-110	396
Ps001791	Unigene0046878	99	100	1	0	102	201	218	119	3e-49	195
Ps001792	Unigene0050666	97.01	201	6	0	1	201	611	811	8e-98	356
Ps001793	Unigene0035436	98.02	202	3	1	1	201	2735	2534	8e-101	366
Ps001794	Unigene0010188	99.5	201	1	0	1	201	585	785	3e-108	391
Ps001795	Unigene0051836	100	201	0	0	1	201	268	468	1e-110	398
Ps001796	Unigene0053504	98.01	201	4	0	1	201	1036	1236	2e-107	388
Ps001797	Unigene0043018	99.5	202	0	1	1	201	711	912	2e-106	385
Ps001798	Unigene0036623	99	201	2	0	1	201	1308	1108	2e-107	388
Ps001800	Unigene0010869	99	201	2	0	1	201	175	375	2e-107	388
Ps001802	Unigene0042032	98.01	201	4	0	1	201	1196	1396	5e-101	367
Ps001803	Unigene0017902	100	198	0	0	4	201	447	250	8e-109	392
Ps001804	Unigene0028946	91.88	160	13	0	1	160	46	205	4e-55	214
Ps001805	Unigene0006932	100	201	0	0	1	201	1222	1422	1e-110	398
Ps001806	Unigene0019758	98.51	201	3	0	1	201	1321	1521	1e-106	385
Ps001807	Unigene0041589	97.87	141	3	0	1	141	141	1	4e-69	261
Ps001808	Unigene0082830	99.5	201	1	0	1	201	553	353	8e-110	396
Ps001809	Unigene0026006	99	201	2	0	1	201	75	275	8e-106	383
Ps001810	Unigene0010204	96.02	201	8	0	1	201	856	1056	3e-99	361
Ps001811	Unigene0049802	95.15	206	3	2	1	201	329	126	2e-89	328
Ps001812	Unigene0008543	99.5	201	1	0	1	201	979	1179	3e-108	391
Ps001813	Unigene0017106	100	201	0	0	1	201	372	172	1e-110	398
Ps001814	Unigene0043163	99.5	201	1	0	1	201	246	46	8e-110	396
Ps001815	Unigene0042032	98.51	201	3	0	1	201	614	414	5e-94	343
Ps001817	Unigene0012363	99	201	2	0	1	201	1181	981	2e-107	388
Ps001818	Unigene0019016	98.51	201	3	0	1	201	987	1187	1e-106	385
Ps001819	Unigene0025640	91.04	201	9	1	1	201	410	219	1e-74	279
Ps001820	Unigene0017367	97.51	201	5	0	1	201	898	698	6e-105	380
Ps001821	Unigene0043601	99.5	201	1	0	1	201	973	773	8e-110	396
Ps001822	Unigene0042000	98.51	201	3	0	1	201	1479	1679	2e-103	375
Ps001823	Unigene0014461	100	201	0	0	1	201	1740	1940	1e-110	398
Ps001824	Unigene0003811	99.5	201	1	0	1	201	742	942	3e-108	391
Ps001825	Unigene0018938	90.74	108	10	0	1	108	544	437	3e-31	135
Ps001826	Unigene0026006	98.51	201	3	0	1	201	219	419	1e-106	385
Ps001827	Unigene0042717	100	200	0	0	2	201	1080	881	2e-110	398
Ps001828	Unigene0005507	99.5	201	1	0	1	201	1294	1094	8e-110	396
Ps001829	Unigene0012063	99.5	201	1	0	1	201	1587	1387	1e-95	349
Ps001830	Unigene0002846	99	201	2	0	1	201	704	504	2e-107	388
Ps001832	Unigene0042014	99.5	201	1	0	1	201	843	643	8e-110	396
Ps001834	Unigene0005541	99	201	2	0	1	201	412	612	2e-107	388
Ps001835	Unigene0057678	100	201	0	0	1	201	503	303	1e-110	398
Ps001836	Unigene0009311	99	201	2	0	1	201	476	276	2e-107	388
Ps001837	Unigene0006238	99	201	2	0	1	201	740	540	5e-109	393
Ps001838	Unigene0008008	97.49	199	5	0	1	199	302	500	4e-104	377
Ps001839	Unigene0044258	99.5	201	1	0	1	201	578	778	3e-108	391
Ps001840	Unigene0041531	99.5	201	1	0	1	201	634	434	8e-110	396
Ps001841	Unigene0002446	99.5	201	1	0	1	201	1116	1316	3e-108	391
Ps001842	Unigene0023208	90.15	203	17	3	1	200	114	316	1e-59	229
Ps001843	Unigene0044502	98.51	201	3	0	1	201	1108	908	1e-106	385
Ps001844	Unigene0046093	99.5	201	0	1	1	201	913	714	8e-106	383
Ps001845	Unigene0003822	99	201	2	0	1	201	653	853	5e-109	393
Ps001846	Unigene0020257	99	201	2	0	1	201	861	1061	2e-107	388
Ps001847	Unigene0007895	99	201	2	0	1	201	352	152	2e-107	388
Ps001848	Unigene0034680	91.52	165	14	0	1	165	102	266	1e-55	216
Ps001850	Unigene0046111	98.01	201	4	0	1	201	179	379	9e-106	382
Ps001851	Unigene0043503	99	201	2	0	1	201	44	244	2e-107	388
Ps001852	Unigene0006674	96.52	201	7	0	1	201	481	281	2e-98	358
Ps001853	Unigene0047052	99	201	2	0	1	201	658	858	5e-109	393
Ps001854	Unigene0012114	99.5	201	1	0	1	201	616	816	3e-108	391
Ps001855	Unigene0027793	97.01	201	6	0	1	201	151	351	6e-101	366
Ps001856	Unigene0044528	98.01	201	4	0	1	201	1761	1561	3e-104	377
Ps001857	Unigene0044612	100	201	0	0	1	201	720	920	1e-110	398
Ps001858	Unigene0044660	97.55	204	2	1	1	201	88	291	3e-99	361
Ps001859	Unigene0046204	99.5	201	1	0	1	201	1530	1330	3e-108	391
Ps001860	Unigene0025640	100	201	0	0	1	201	347	147	1e-110	398
Ps001861	Unigene0003743	99.5	199	1	0	1	199	2594	2792	5e-107	387
Ps001862	Unigene0010715	99	201	2	0	1	201	225	425	2e-107	388
Ps001863	Unigene0043174	97.51	201	5	0	1	201	1536	1336	2e-106	385
Ps001864	Unigene0043736	100	201	0	0	1	201	305	505	1e-110	398
Ps001866	Unigene0007210	100	201	0	0	1	201	632	832	1e-110	398
Ps001867	Unigene0003281	100	122	0	0	1	122	122	1	6e-51	200
Ps001868	Unigene0011284	97.01	201	5	1	1	201	1309	1110	1e-101	369
Ps001869	Unigene0048715	84.89	139	19	2	1	138	374	237	1e-18	93.7
Ps001872	Unigene0041224	98.99	199	2	0	1	199	540	738	1e-106	385
Ps001873	Unigene0042424	100	201	0	0	1	201	477	277	1e-110	398
Ps001874	Unigene0003878	99.5	201	1	0	1	201	566	766	8e-110	396
Ps001875	Unigene0048611	98.29	175	3	0	8	182	268	442	2e-89	328
Ps001876	Unigene0044556	99.5	201	1	0	1	201	76	276	3e-108	391
Ps001877	Unigene0003982	99.5	201	1	0	1	201	285	85	3e-108	391
Ps001878	Unigene0046158	99.5	201	1	0	1	201	92	292	8e-110	396
Ps001879	Unigene0086125	99.48	191	1	0	11	201	513	703	8e-104	376
Ps001880	Unigene0043567	100	201	0	0	1	201	162	362	1e-110	398
Ps001881	Unigene0084652	99.5	201	0	1	1	201	849	650	8e-106	383
Ps001882	Unigene0082245	98.01	201	4	0	1	201	743	943	3e-104	377
Ps001883	Unigene0032728	91.88	160	12	1	1	160	81	239	4e-54	211
Ps001884	Unigene0005581	100	173	0	0	29	201	1611	1439	1e-94	345
Ps001885	Unigene0016117	98.34	181	3	0	1	181	204	384	5e-93	340
Ps001887	Unigene0083638	99	201	2	0	1	201	1916	2116	2e-107	388
Ps001888	Unigene0043765	99	201	2	0	1	201	499	699	8e-106	383
Ps001889	Unigene0026318	94.97	199	8	1	5	201	1126	928	3e-89	328
Ps001890	Unigene0041206	98.51	201	3	0	1	201	1683	1883	4e-108	390
Ps001891	Unigene0047809	100	201	0	0	1	201	792	992	1e-110	398
Ps001892	Unigene0045727	98.51	201	3	0	1	201	467	267	4e-108	390
Ps001893	Unigene0010909	98.02	202	3	1	1	201	57	258	2e-102	371
Ps001894	Unigene0083381	99.5	201	1	0	1	201	485	685	3e-108	391
Ps001895	Unigene0017110	98.51	201	3	0	1	201	727	927	1e-106	385
Ps001896	Unigene0009008	99.5	200	1	0	2	201	1356	1157	1e-107	389
Ps001897	Unigene0004475	99.5	201	1	0	1	201	656	456	8e-110	396
Ps001898	Unigene0048307	99.5	201	1	0	1	201	750	550	3e-108	391
Ps001901	Unigene0030324	98.51	201	1	2	1	201	110	308	1e-98	359
Ps001902	Unigene0004793	99.5	201	1	0	1	201	505	705	8e-110	396
Ps001903	Unigene0044671	100	201	0	0	1	201	309	509	1e-110	398
Ps001904	Unigene0034891	99.5	201	1	0	1	201	224	424	3e-108	391
Ps001905	Unigene0045308	99.5	201	1	0	1	201	528	328	3e-108	391
Ps001906	Unigene0053446	96.85	127	4	0	2	128	312	438	1e-61	236
Ps001907	Unigene0043611	99.5	201	1	0	1	201	131	331	8e-110	396
Ps001908	Unigene0036320	99	201	2	0	1	201	407	607	8e-106	383
Ps001909	Unigene0012058	100	201	0	0	1	201	1681	1481	1e-110	398
Ps001910	Unigene0010262	99.5	201	1	0	1	201	2173	1973	3e-108	391
Ps001911	Unigene0043105	100	201	0	0	1	201	671	871	1e-110	398
Ps001912	Unigene0043280	98.51	201	3	0	1	201	1726	1926	1e-106	385
Ps001913	Unigene0042544	99.5	201	1	0	1	201	1917	1717	8e-110	396
Ps001914	Unigene0047977	98.51	201	3	0	1	201	1202	1002	5e-105	380
Ps001916	Unigene0041417	99	201	2	0	1	201	863	1063	2e-107	388
Ps001917	Unigene0048180	99.29	140	1	0	62	201	1	140	8e-72	270
Ps001918	Unigene0046113	99.36	156	1	0	1	156	156	1	2e-81	301
Ps001919	Unigene0006892	99.29	140	1	0	62	201	897	1036	2e-73	275

## Sheet: Sheet2
Query id	Subject id	Marker accession number in this study	Linkage Group	cM Genetic Distance
Ps000325	Unigene0020448	PsMk1-1	LGI	0
Ps001271	Unigene0042197	PsMk1-2	LGI	0
Ps001420	Unigene0003997	PsMk1-3	LGI	0
Ps001282	Unigene0044984	PsMk1-4	LGI	1.1
Ps001490	Unigene0035541	PsMk1-5	LGI	1.1
Ps001214	Unigene0041341	PsMk1-6	LGI	1.8
Ps001419	Unigene0042095	PsMk1-7	LGI	2.6
Ps001539	Unigene0042095	PsMk1-8	LGI	2.6
Ps001322	Unigene0003605	PsMk1-9	LGI	2.9
Ps001212	Unigene0044104	PsMk1-10	LGI	3.2
Ps001529	Unigene0042250	PsMk1-11	LGI	3.2
Ps001330	Unigene0012378	PsMk1-12	LGI	4.8
Ps001531	Unigene0083461	PsMk1-13	LGI	4.8
Ps001192	Unigene0010365	PsMk1-14	LGI	5.3
Ps001267	Unigene0046969	PsMk1-15	LGI	5.3
Ps001363	Unigene0043170	PsMk1-16	LGI	5.3
Ps001503	Unigene0044443	PsMk1-17	LGI	5.3
Ps001702	Unigene0033337	PsMk1-18	LGI	5.3
Ps001381	Unigene0003010	PsMk1-19	LGI	5.6
Ps001388	Unigene0042999	PsMk1-20	LGI	6.3
Ps001415	Unigene0048842	PsMk1-21	LGI	6.6
Ps001397	Unigene0007952	PsMk1-22	LGI	6.9
Ps001294	Unigene0044955	PsMk1-23	LGI	8.4
Ps001318	Unigene0086415	PsMk1-24	LGI	8.4
Ps001424	Unigene0032143	PsMk1-25	LGI	8.4
Ps001466	Unigene0039737	PsMk1-26	LGI	8.4
Ps001310	Unigene0047629	PsMk1-27	LGI	8.8
Ps001232	Unigene0040076	PsMk1-28	LGI	8.9
Ps001631	Unigene0082323	PsMk1-29	LGI	9.3
Ps001475	Unigene0004514	PsMk1-30	LGI	13.5
Ps001484	Unigene0085186	PsMk1-31	LGI	13.5
Ps001218	Unigene0046127	PsMk1-32	LGI	14.5
Ps001374	Unigene0047056	PsMk1-33	LGI	15
Ps001437	Unigene0025000	PsMk1-34	LGI	15
Ps001471	Unigene0043157	PsMk1-35	LGI	15.5
Ps001117	Unigene0081498	PsMk1-36	LGI	15.6
Ps001367	Unigene0004256	PsMk1-37	LGI	20.8
Ps001741	Unigene0010146	PsMk1-38	LGI	20.8
Ps001834	Unigene0005541	PsMk1-39	LGI	20.8
Ps001268	Unigene0043466	PsMk1-40	LGI	21.5
Ps001154	Unigene0007707	PsMk1-41	LGI	25.1
Ps001341	Unigene0041397	PsMk1-42	LGI	25.1
Ps001423	Unigene0042440	PsMk1-43	LGI	25.9
Ps001174	Unigene0008238	PsMk1-44	LGI	26.6
Ps001457	Unigene0043961	PsMk1-45	LGI	26.6
Ps001351	Unigene0039247	PsMk1-46	LGI	28.7
Ps001162	Unigene0008592	PsMk1-47	LGI	32.8
Ps001167	Unigene0011775	PsMk1-48	LGI	34.1
Ps001305	Unigene0046304	PsMk1-49	LGI	34.1
Ps001314	Unigene0053766	PsMk1-50	LGI	35
Ps000092	Unigene0084542	PsMk1-51	LGI	35.3
Ps000323	Unigene0045590	PsMk1-52	LGI	35.3
Ps001302	Unigene0011430	PsMk1-53	LGI	35.3
Ps001378	Unigene0004461	PsMk1-54	LGI	35.3
Ps001175	Unigene0038976	PsMk1-55	LGI	36.1
Ps001227	Unigene0039639	PsMk1-56	LGI	36.1
Ps001408	Unigene0009618	PsMk1-57	LGI	40
Ps001507	Unigene0009746	PsMk1-58	LGI	40
Ps001226	Unigene0050998	PsMk1-59	LGI	41.2
Ps001359	Unigene0018581	PsMk1-60	LGI	41.2
Ps001443	Unigene0043917	PsMk1-61	LGI	41.2
Ps001447	Unigene0024552	PsMk1-62	LGI	42.4
Ps001325	Unigene0008515	PsMk1-63	LGI	45.2
Ps001234	Unigene0043687	PsMk1-64	LGI	46.2
Ps001441	Unigene0041973	PsMk1-65	LGI	46.9
Ps001516	Unigene0044931	PsMk1-66	LGI	47.6
Ps001483	Unigene0041930	PsMk1-67	LGI	50.3
Ps001650	Unigene0041930	PsMk1-68	LGI	50.5
Ps001384	Unigene0045569	PsMk1-69	LGI	54.2
Ps001530	Unigene0031926	PsMk1-70	LGI	54.2
Ps001513	Unigene0084777	PsMk1-71	LGI	55.7
Ps001254	Unigene0030582	PsMk1-72	LGI	55.9
Ps001177	Unigene0019856	PsMk1-73	LGI	58.9
Ps001221	Unigene0042804	PsMk1-74	LGI	58.9
Ps001361	Unigene0051873	PsMk1-75	LGI	58.9
Ps001422	Unigene0005879	PsMk1-76	LGI	58.9
Ps001429	Unigene0086552	PsMk1-77	LGI	58.9
Ps001172	Unigene0037071	PsMk1-78	LGI	59.6
Ps001233	Unigene0045807	PsMk1-79	LGI	61.2
Ps001252	Unigene0042534	PsMk1-80	LGI	61.2
Ps001279	Unigene0036843	PsMk1-81	LGI	61.2
Ps001472	Unigene0011456	PsMk1-82	LGI	61.2
Ps001298	Unigene0041549	PsMk1-83	LGI	61.6
Ps001467	Unigene0008951	PsMk1-84	LGI	64
Ps001738	Unigene0040180	PsMk1-85	LGI	64
Ps000595	Unigene0037261	PsMk1-86	LGI	65.1
Ps000419	Unigene0081594	PsMk1-87	LGI	67.1
Ps000626	Unigene0045930	PsMk1-88	LGI	67.1
Ps001061	Unigene0013562	PsMk1-89	LGI	67.1
Ps001082	Unigene0085584	PsMk1-90	LGI	72.9
Ps001086	Unigene0018875	PsMk1-91	LGI	75
Ps000941	Unigene0058306	PsMk1-92	LGI	75.5
Ps001045	Unigene0027716	PsMk1-93	LGI	75.5
Ps001583	Unigene0018875	PsMk1-94	LGI	75.5
Ps000845	Unigene0072701	PsMk1-95	LGI	76.1
Ps001132	Unigene0044873	PsMk1-96	LGI	76.1
Ps001133	Unigene0044862	PsMk1-97	LGI	76.1
Ps000784	Unigene0005737	PsMk1-98	LGI	76.6
Ps001113	Unigene0045295	PsMk1-99	LGI	76.6
Ps001185	Unigene0045633	PsMk1-100	LGI	83.9
Ps000771	Unigene0042110	PsMk1-101	LGI	85.4
Ps001156	Unigene0046030	PsMk1-102	LGI	85.4
Ps000841	Unigene0050462	PsMk1-103	LGI	85.9
Ps001166	Unigene0006766	PsMk1-104	LGI	92.7
Ps001198	Unigene0043542	PsMk1-105	LGI	92.7
Ps001275	Unigene0026298	PsMk1-106	LGI	92.7
Ps001434	Unigene0043365	PsMk1-107	LGI	92.7
Ps001239	Unigene0019424	PsMk1-108	LGI	95.5
Ps001258	Unigene0041679	PsMk1-109	LGI	95.5
Ps001371	Unigene0041565	PsMk1-110	LGI	95.5
Ps001248	Unigene0016730	PsMk1-111	LGI	96
Ps000012	Unigene0043612	PsMk1-112	LGI	100.9
Ps001537	Unigene0004541	PsMk1-113	LGI	101.1
Ps001105	Unigene0085379	PsMk1-114	LGI	101.6
Ps000782	Unigene0043554	PsMk1-115	LGI	102
Ps000800	Unigene0043776	PsMk1-116	LGI	102
Ps000830	Unigene0052435	PsMk1-117	LGI	103.4
Ps000927	Unigene0043019	PsMk1-118	LGI	103.4
Ps000994	Unigene0041537	PsMk1-119	LGI	104.2
Ps000803	Unigene0005850	PsMk1-120	LGI	105
Ps000811	Unigene0042067	PsMk1-121	LGI	105
Ps001064	Unigene0008676	PsMk1-122	LGI	105
Ps001662	Unigene0042067	PsMk1-123	LGI	105
Ps000778	Unigene0050559	PsMk1-124	LGI	105.9
Ps001304	Unigene0045068	PsMk1-125	LGI	107.9
Ps000802	Unigene0082954	PsMk1-126	LGI	110.8
Ps000856	Unigene0049409	PsMk1-127	LGI	110.8
Ps001068	Unigene0005548	PsMk1-128	LGI	110.8
Ps001144	Unigene0044830	PsMk1-129	LGI	110.8
Ps000825	Unigene0010791	PsMk1-130	LGI	112.6
Ps000887	Unigene0043314	PsMk1-131	LGI	112.6
Ps000949	Unigene0041552	PsMk1-132	LGI	112.6
Ps000958	Unigene0047160	PsMk1-133	LGI	112.6
Ps000100	Unigene0084353	PsMk1-134	LGI	112.9
Ps000920	Unigene0084353	PsMk1-135	LGI	112.9
Ps001052	Unigene0036349	PsMk1-136	LGI	112.9
Ps000959	Unigene0042142	PsMk1-137	LGI	114
Ps001100	Unigene0041531	PsMk1-138	LGI	114
Ps001840	Unigene0041531	PsMk1-139	LGI	114
Ps001110	Unigene0009231	PsMk1-140	LGI	114.9
Ps001067	Unigene0045071	PsMk1-141	LGI	117.3
Ps000817	Unigene0046055	PsMk1-142	LGI	121.5
Ps001099	Unigene0007171	PsMk1-143	LGI	128.7
Ps000823	Unigene0040199	PsMk1-144	LGI	134.4
Ps000827	Unigene0020770	PsMk1-145	LGI	141.8
Ps000833	Unigene0042269	PsMk1-146	LGI	141.8
Ps000844	Unigene0041450	PsMk1-147	LGI	141.8
Ps001078	Unigene0005531	PsMk1-148	LGI	141.8
Ps000855	Unigene0041760	PsMk1-149	LGI	142.4
Ps000858	Unigene0046208	PsMk1-150	LGI	142.4
Ps000910	Unigene0045892	PsMk1-151	LGI	144.1
Ps000971	Unigene0008813	PsMk1-152	LGI	144.9
Ps001005	Unigene0007014	PsMk1-153	LGI	144.9
Ps001136	Unigene0044439	PsMk1-154	LGI	145.1
Ps000154	Unigene0008903	PsMk2-1	LGII	0
Ps000206	Unigene0049084	PsMk2-2	LGII	0
Ps000223	Unigene0047465	PsMk2-3	LGII	0
Ps000293	Unigene0043018	PsMk2-4	LGII	0
Ps001797	Unigene0043018	PsMk2-5	LGII	0
Ps000115	Unigene0041436	PsMk2-6	LGII	0.4
Ps000103	Unigene0051483	PsMk2-7	LGII	0.6
Ps001793	Unigene0035436	PsMk2-8	LGII	0.6
Ps000026	Unigene0017246	PsMk2-9	LGII	0.9
Ps001416	Unigene0043971	PsMk2-10	LGII	1.7
Ps000023	Unigene0084097	PsMk2-11	LGII	2.1
Ps000653	Unigene0020216	PsMk2-12	LGII	3.8
Ps001018	Unigene0084036	PsMk2-13	LGII	3.8
Ps001625	Unigene0006674	PsMk2-14	LGII	3.8
Ps000316	Unigene0047728	PsMk2-15	LGII	4.4
Ps001058	Unigene0049007	PsMk2-16	LGII	4.4
Ps001573	Unigene0047728	PsMk2-17	LGII	4.4
Ps000028	Unigene0018945	PsMk2-18	LGII	4.6
Ps000201	Unigene0047012	PsMk2-19	LGII	4.6
Ps000083	Unigene0038502	PsMk2-20	LGII	6.1
Ps000118	Unigene0056542	PsMk2-21	LGII	6.1
Ps000147	Unigene0044171	PsMk2-22	LGII	6.1
Ps000032	Unigene0007701	PsMk2-23	LGII	6.8
Ps001139	Unigene0016451	PsMk2-24	LGII	8.1
Ps001143	Unigene0028630	PsMk2-25	LGII	8.1
Ps000040	Unigene0003781	PsMk2-26	LGII	11.2
Ps000260	Unigene0044383	PsMk2-27	LGII	12.2
Ps001661	Unigene0020168	PsMk2-28	LGII	19.2
Ps001698	Unigene0020172	PsMk2-29	LGII	19.2
Ps000213	Unigene0043750	PsMk2-30	LGII	22.1
Ps000552	Unigene0010030	PsMk2-31	LGII	22.1
Ps000175	Unigene0012981	PsMk2-32	LGII	22.4
Ps000336	Unigene0041788	PsMk2-33	LGII	23
Ps000236	Unigene0044550	PsMk2-34	LGII	23.6
Ps000355	Unigene0027276	PsMk2-35	LGII	23.6
Ps000338	Unigene0045017	PsMk2-36	LGII	25.6
Ps000345	Unigene0050663	PsMk2-37	LGII	26.1
Ps000490	Unigene0046538	PsMk2-38	LGII	26.1
Ps000644	Unigene0047895	PsMk2-39	LGII	26.1
Ps000306	Unigene0050589	PsMk2-40	LGII	26.5
Ps000160	Unigene0007056	PsMk2-41	LGII	47.9
Ps000867	Unigene0053223	PsMk2-42	LGII	47.9
Ps000057	Unigene0044518	PsMk2-43	LGII	48.4
Ps000085	Unigene0023104	PsMk2-44	LGII	48.6
Ps000097	Unigene0023104	PsMk2-45	LGII	48.6
Ps000394	Unigene0048758	PsMk2-46	LGII	48.8
Ps001755	Unigene0018269	PsMk2-47	LGII	48.8
Ps000186	Unigene0004998	PsMk2-48	LGII	49.7
Ps000156	Unigene0045814	PsMk2-49	LGII	60.4
Ps000130	Unigene0049886	PsMk2-50	LGII	61.2
Ps000416	Unigene0002515	PsMk2-51	LGII	61.9
Ps000123	Unigene0024963	PsMk2-52	LGII	69.5
Ps000764	Unigene0041439	PsMk2-53	LGII	69.5
Ps000352	Unigene0047103	PsMk2-54	LGII	75.7
Ps000134	Unigene0042150	PsMk2-55	LGII	77.1
Ps000224	Unigene0012959	PsMk2-56	LGII	77.8
Ps000075	Unigene0003336	PsMk2-57	LGII	79.1
Ps000214	Unigene0043081	PsMk2-58	LGII	79.7
Ps000277	Unigene0043759	PsMk2-59	LGII	79.7
Ps001642	Unigene0007590	PsMk2-60	LGII	95.2
Ps000503	Unigene0019939	PsMk2-61	LGII	96.1
Ps000212	Unigene0042330	PsMk2-62	LGII	96.3
Ps000235	Unigene0042358	PsMk2-63	LGII	108
Ps001656	Unigene0002742	PsMk2-64	LGII	108.3
Ps000331	Unigene0004679	PsMk2-65	LGII	112.7
Ps000313	Unigene0045128	PsMk2-66	LGII	134
Ps000090	Unigene0023223	PsMk2-67	LGII	138.7
Ps000116	Unigene0043311	PsMk2-68	LGII	150.1
Ps000477	Unigene0084241	PsMk2-69	LGII	153.1
Ps000248	Unigene0003992	PsMk2-70	LGII	157.2
Ps000641	Unigene0003804	PsMk2-71	LGII	157.2
Ps001344	Unigene0004221	PsMk2-72	LGII	157.2
Ps000095	Unigene0047594	PsMk2-73	LGII	158.1
Ps001882	Unigene0082245	PsMk2-74	LGII	158.6
Ps000193	Unigene0009648	PsMk2-75	LGII	159
Ps000199	Unigene0019828	PsMk2-76	LGII	159
Ps001112	Unigene0044161	PsMk2-77	LGII	159.3
Ps000122	Unigene0010933	PsMk2-78	LGII	160.1
Ps000037	Unigene0033103	PsMk2-79	LGII	162.5
Ps000042	Unigene0044665	PsMk2-80	LGII	162.5
Ps000183	Unigene0005715	PsMk2-81	LGII	162.5
Ps000054	Unigene0007039	PsMk2-82	LGII	162.7
Ps000185	Unigene0006011	PsMk2-83	LGII	162.7
Ps000786	Unigene0003670	PsMk2-84	LGII	164.1
Ps001728	Unigene0045269	PsMk2-85	LGII	164.1
Ps000052	Unigene0060615	PsMk2-86	LGII	165.7
Ps001716	Unigene0021033	PsMk2-87	LGII	170.2
Ps000404	Unigene0014764	PsMk2-88	LGII	170.7
Ps000322	Unigene0019055	PsMk2-89	LGII	171.1
Ps000014	Unigene0036434	PsMk2-90	LGII	171.3
Ps000072	Unigene0006107	PsMk2-91	LGII	171.3
Ps000192	Unigene0047905	PsMk2-92	LGII	171.3
Ps000001	Unigene0005426	PsMk2-93	LGII	172.4
Ps000003	Unigene0048915	PsMk2-94	LGII	172.4
Ps000093	Unigene0045959	PsMk2-95	LGII	172.4
Ps000384	Unigene0042343	PsMk2-96	LGII	172.4
Ps000162	Unigene0050308	PsMk2-97	LGII	172.8
Ps000163	Unigene0007830	PsMk2-98	LGII	175.2
Ps000065	Unigene0042239	PsMk2-99	LGII	175.7
Ps001029	Unigene0024999	PsMk2-100	LGII	175.7
Ps000013	Unigene0042812	PsMk2-101	LGII	179.6
Ps000239	Unigene0046048	PsMk2-102	LGII	179.9
Ps000272	Unigene0044575	PsMk2-103	LGII	179.9
Ps000373	Unigene0086734	PsMk2-104	LGII	179.9
Ps000255	Unigene0061007	PsMk2-105	LGII	181
Ps000099	Unigene0045536	PsMk2-106	LGII	181.6
Ps000288	Unigene0045147	PsMk2-107	LGII	181.6
Ps000334	Unigene0038166	PsMk2-108	LGII	183
Ps001525	Unigene0050932	PsMk2-109	LGII	183.2
Ps000298	Unigene0085608	PsMk2-110	LGII	183.8
Ps000079	Unigene0004670	PsMk2-111	LGII	184
Ps001883	Unigene0032728	PsMk2-112	LGII	184.6
Ps000087	Unigene0081872	PsMk2-113	LGII	184.9
Ps001107	Unigene0042565	PsMk2-114	LGII	184.9
Ps000736	Unigene0035855	PsMk2-115	LGII	188.1
Ps000104	Unigene0043734	PsMk2-116	LGII	190.7
Ps000066	Unigene0013251	PsMk2-117	LGII	191.9
Ps001051	Unigene0047546	PsMk2-118	LGII	193.5
Ps000342	Unigene0037220	PsMk2-119	LGII	200.5
Ps000368	Unigene0008117	PsMk2-120	LGII	200.5
Ps000018	Unigene0049576	PsMk2-121	LGII	201.9
Ps000172	Unigene0009756	PsMk2-122	LGII	203.4
Ps001544	Unigene0047256	PsMk2-123	LGII	205.1
Ps000247	Unigene0001882	PsMk2-124	LGII	208.5
Ps000589	Unigene0009556	PsMk2-125	LGII	214
Ps000649	Unigene0009556	PsMk2-126	LGII	214
Ps001843	Unigene0044502	PsMk2-127	LGII	214
Ps000217	Unigene0050792	PsMk2-128	LGII	214.6
Ps001558	Unigene0058453	PsMk2-129	LGII	214.6
Ps000038	Unigene0045779	PsMk2-130	LGII	214.9
Ps000058	Unigene0004038	PsMk2-131	LGII	214.9
Ps000143	Unigene0043522	PsMk2-132	LGII	214.9
Ps000339	Unigene0049641	PsMk2-133	LGII	214.9
Ps000746	Unigene0041999	PsMk2-134	LGII	214.9
Ps000251	Unigene0042882	PsMk2-135	LGII	216
Ps000450	Unigene0043573	PsMk2-136	LGII	216.5
Ps000673	Unigene0044789	PsMk2-137	LGII	216.5
Ps000414	Unigene0004205	PsMk3-1	LGIII	6.3
Ps000669	Unigene0042145	PsMk3-2	LGIII	6.3
Ps000724	Unigene0042383	PsMk3-3	LGIII	6.3
Ps000742	Unigene0041205	PsMk3-4	LGIII	6.3
Ps000730	Unigene0034492	PsMk3-5	LGIII	6.6
Ps000411	Unigene0048382	PsMk3-6	LGIII	7.1
Ps000472	Unigene0017839	PsMk3-7	LGIII	7.1
Ps000646	Unigene0041937	PsMk3-8	LGIII	7.1
Ps000662	Unigene0005683	PsMk3-9	LGIII	7.1
Ps000727	Unigene0011725	PsMk3-10	LGIII	7.1
Ps000740	Unigene0004407	PsMk3-11	LGIII	7.1
Ps000389	Unigene0047529	PsMk3-12	LGIII	7.5
Ps000719	Unigene0011460	PsMk3-13	LGIII	7.5
Ps000682	Unigene0008641	PsMk3-14	LGIII	8.5
Ps000704	Unigene0005812	PsMk3-15	LGIII	8.7
Ps001576	Unigene0041402	PsMk3-16	LGIII	8.7
Ps001739	Unigene0041402	PsMk3-17	LGIII	8.7
Ps000637	Unigene0049890	PsMk3-18	LGIII	8.9
Ps000521	Unigene0041402	PsMk3-19	LGIII	9.7
Ps000709	Unigene0058051	PsMk3-20	LGIII	9.7
Ps001545	Unigene0006858	PsMk3-21	LGIII	9.9
Ps000546	Unigene0012272	PsMk3-22	LGIII	10.4
Ps000448	Unigene0006858	PsMk3-23	LGIII	11
Ps001118	Unigene0043977	PsMk3-24	LGIII	17.5
Ps001727	Unigene0048421	PsMk3-25	LGIII	17.7
Ps000280	Unigene0044252	PsMk3-26	LGIII	20.3
Ps000473	Unigene0044127	PsMk3-27	LGIII	20.3
Ps000545	Unigene0054740	PsMk3-28	LGIII	20.3
Ps000696	Unigene0045484	PsMk3-29	LGIII	20.3
Ps000009	Unigene0045468	PsMk3-30	LGIII	26
Ps000144	Unigene0005302	PsMk3-31	LGIII	26
Ps000289	Unigene0041938	PsMk3-32	LGIII	27.7
Ps000462	Unigene0004932	PsMk3-33	LGIII	27.7
Ps000475	Unigene0050322	PsMk3-34	LGIII	27.7
Ps000487	Unigene0045214	PsMk3-35	LGIII	27.7
Ps000549	Unigene0042842	PsMk3-36	LGIII	31.2
Ps000605	Unigene0045389	PsMk3-37	LGIII	31.2
Ps000692	Unigene0024300	PsMk3-38	LGIII	31.6
Ps000622	Unigene0005412	PsMk3-39	LGIII	32
Ps000089	Unigene0085294	PsMk3-40	LGIII	33.1
Ps000499	Unigene0008039	PsMk3-41	LGIII	34.4
Ps000526	Unigene0050726	PsMk3-42	LGIII	35.3
Ps000620	Unigene0019402	PsMk3-43	LGIII	36.4
Ps000759	Unigene0086340	PsMk3-44	LGIII	36.4
Ps000664	Unigene0012110	PsMk3-45	LGIII	54.6
Ps000476	Unigene0014743	PsMk3-46	LGIII	54.8
Ps000494	Unigene0006403	PsMk3-47	LGIII	54.8
Ps000666	Unigene0047545	PsMk3-48	LGIII	54.8
Ps000439	Unigene0044965	PsMk3-49	LGIII	56
Ps000468	Unigene0045583	PsMk3-50	LGIII	56
Ps000302	Unigene0008001	PsMk3-51	LGIII	57.9
Ps000708	Unigene0046189	PsMk3-52	LGIII	57.9
Ps000766	Unigene0082557	PsMk3-53	LGIII	58.1
Ps000963	Unigene0006350	PsMk3-54	LGIII	58.3
Ps000593	Unigene0008414	PsMk3-55	LGIII	58.5
Ps000196	Unigene0045725	PsMk3-56	LGIII	58.7
Ps000608	Unigene0042739	PsMk3-57	LGIII	60.1
Ps000488	Unigene0007408	PsMk3-58	LGIII	60.3
Ps000687	Unigene0002238	PsMk3-59	LGIII	60.3
Ps000767	Unigene0043982	PsMk3-60	LGIII	60.3
Ps000629	Unigene0040184	PsMk3-61	LGIII	68.3
Ps000036	Unigene0041169	PsMk3-62	LGIII	69.4
Ps000108	Unigene0041169	PsMk3-63	LGIII	69.4
Ps000555	Unigene0042470	PsMk3-64	LGIII	69.4
Ps001891	Unigene0047809	PsMk3-65	LGIII	69.4
Ps000588	Unigene0008974	PsMk3-66	LGIII	70.3
Ps000469	Unigene0041415	PsMk3-67	LGIII	71.5
Ps000485	Unigene0013957	PsMk3-68	LGIII	71.5
Ps000748	Unigene0048582	PsMk3-69	LGIII	71.5
Ps001693	Unigene0041415	PsMk3-70	LGIII	71.5
Ps000443	Unigene0046655	PsMk3-71	LGIII	72.5
Ps000640	Unigene0037532	PsMk3-72	LGIII	72.5
Ps000675	Unigene0045453	PsMk3-73	LGIII	72.5
Ps001040	Unigene0007369	PsMk3-74	LGIII	72.9
Ps000613	Unigene0085809	PsMk3-75	LGIII	73.9
Ps000658	Unigene0042168	PsMk3-76	LGIII	73.9
Ps000755	Unigene0019388	PsMk3-77	LGIII	73.9
Ps001549	Unigene0048987	PsMk3-78	LGIII	73.9
Ps000479	Unigene0011467	PsMk3-79	LGIII	92.6
Ps000507	Unigene0026689	PsMk3-80	LGIII	92.6
Ps000410	Unigene0003940	PsMk3-81	LGIII	92.8
Ps000524	Unigene0086779	PsMk3-82	LGIII	92.8
Ps000680	Unigene0003785	PsMk3-83	LGIII	92.9
Ps000515	Unigene0020343	PsMk3-84	LGIII	93
Ps000562	Unigene0033174	PsMk3-85	LGIII	93
Ps000573	Unigene0019706	PsMk3-86	LGIII	93
Ps000480	Unigene0004605	PsMk3-87	LGIII	94
Ps000697	Unigene0017613	PsMk3-88	LGIII	94.8
Ps000398	Unigene0004645	PsMk3-89	LGIII	96.4
Ps000497	Unigene0005092	PsMk3-90	LGIII	96.4
Ps000520	Unigene0044880	PsMk3-91	LGIII	96.4
Ps000667	Unigene0013749	PsMk3-92	LGIII	96.4
Ps000699	Unigene0032718	PsMk3-93	LGIII	96.4
Ps000645	Unigene0042944	PsMk3-94	LGIII	97.5
Ps000713	Unigene0041958	PsMk3-95	LGIII	98.7
Ps000418	Unigene0081861	PsMk3-96	LGIII	99.2
Ps000705	Unigene0044857	PsMk3-97	LGIII	99.2
Ps000587	Unigene0007384	PsMk3-98	LGIII	99.7
Ps001070	Unigene0025828	PsMk3-99	LGIII	99.7
Ps000501	Unigene0044642	PsMk3-100	LGIII	100
Ps000597	Unigene0040466	PsMk3-101	LGIII	100.5
Ps000728	Unigene0050450	PsMk3-102	LGIII	104.4
Ps000878	Unigene0044026	PsMk3-103	LGIII	105.1
Ps001917	Unigene0048180	PsMk3-104	LGIII	105.1
Ps000754	Unigene0046500	PsMk3-105	LGIII	110
Ps000594	Unigene0004490	PsMk3-106	LGIII	110.2
Ps000672	Unigene0038966	PsMk3-107	LGIII	110.2
Ps000690	Unigene0041991	PsMk3-108	LGIII	110.2
Ps000695	Unigene0043400	PsMk3-109	LGIII	110.2
Ps000763	Unigene0011615	PsMk3-110	LGIII	110.2
Ps000511	Unigene0048408	PsMk3-111	LGIII	111.2
Ps000585	Unigene0013249	PsMk3-112	LGIII	111.2
Ps001088	Unigene0033768	PsMk3-113	LGIII	111.2
Ps000430	Unigene0005004	PsMk3-114	LGIII	113.7
Ps000455	Unigene0009065	PsMk3-115	LGIII	113.7
Ps000617	Unigene0041629	PsMk3-116	LGIII	113.7
Ps000621	Unigene0042136	PsMk3-117	LGIII	113.7
Ps000757	Unigene0041739	PsMk3-118	LGIII	113.7
Ps000560	Unigene0005260	PsMk3-119	LGIII	114.8
Ps000652	Unigene0009966	PsMk3-120	LGIII	115.1
Ps001084	Unigene0016230	PsMk3-121	LGIII	116.6
Ps000127	Unigene0085294	PsMk3-122	LGIII	117.3
Ps000142	Unigene0037679	PsMk3-123	LGIII	117.3
Ps000164	Unigene0045064	PsMk3-124	LGIII	117.3
Ps000536	Unigene0003948	PsMk3-125	LGIII	117.8
Ps000528	Unigene0002962	PsMk3-126	LGIII	120.1
Ps000610	Unigene0004196	PsMk3-127	LGIII	120.1
Ps000618	Unigene0041833	PsMk3-128	LGIII	120.1
Ps000753	Unigene0028639	PsMk3-129	LGIII	120.1
Ps000538	Unigene0040465	PsMk3-130	LGIII	122.7
Ps001380	Unigene0045804	PsMk3-131	LGIII	123.8
Ps000403	Unigene0042258	PsMk3-132	LGIII	125.3
Ps000489	Unigene0043994	PsMk3-133	LGIII	128.8
Ps000431	Unigene0042753	PsMk3-134	LGIII	129.3
Ps001158	Unigene0051419	PsMk3-135	LGIII	129.3
Ps000650	Unigene0042268	PsMk3-136	LGIII	131.5
Ps000523	Unigene0012379	PsMk3-137	LGIII	132.3
Ps001521	Unigene0018561	PsMk3-138	LGIII	132.3
Ps001803	Unigene0017902	PsMk3-139	LGIII	132.3
Ps000498	Unigene0006421	PsMk3-140	LGIII	132.5
Ps000663	Unigene0046328	PsMk3-141	LGIII	135.4
Ps000706	Unigene0048777	PsMk3-142	LGIII	135.4
Ps000729	Unigene0002558	PsMk3-143	LGIII	135.4
Ps001634	Unigene0084216	PsMk3-144	LGIII	135.4
Ps000406	Unigene0046891	PsMk3-145	LGIII	138.3
Ps000463	Unigene0044341	PsMk3-146	LGIII	138.3
Ps000632	Unigene0044900	PsMk3-147	LGIII	138.5
Ps000424	Unigene0041360	PsMk3-148	LGIII	141.1
Ps000447	Unigene0054611	PsMk3-149	LGIII	141.1
Ps000438	Unigene0019007	PsMk3-150	LGIII	146.1
Ps000554	Unigene0014075	PsMk3-151	LGIII	146.1
Ps000505	Unigene0018444	PsMk3-152	LGIII	148
Ps000582	Unigene0005627	PsMk3-153	LGIII	151
Ps000721	Unigene0017770	PsMk3-154	LGIII	152.2
Ps000063	Unigene0046752	PsMk3-155	LGIII	153.2
Ps000607	Unigene0042244	PsMk3-156	LGIII	153.3
Ps001208	Unigene0015948	PsMk3-157	LGIII	153.3
Ps000396	Unigene0006116	PsMk3-158	LGIII	167.6
Ps001401	Unigene0041423	PsMk3-159	LGIII	170
Ps000159	Unigene0049126	PsMk3-160	LGIII	170.1
Ps001213	Unigene0034048	PsMk3-161	LGIII	170.4
Ps000033	Unigene0046893	PsMk3-162	LGIII	170.9
Ps000346	Unigene0044950	PsMk3-163	LGIII	172.4
Ps000351	Unigene0033444	PsMk3-164	LGIII	173
Ps000179	Unigene0009172	PsMk3-165	LGIII	175.1
Ps000428	Unigene0013971	PsMk3-166	LGIII	175.5
Ps000745	Unigene0087126	PsMk3-167	LGIII	175.5
Ps000734	Unigene0009570	PsMk3-168	LGIII	176
Ps000226	Unigene0047095	PsMk3-169	LGIII	179.8
Ps000252	Unigene0042876	PsMk3-170	LGIII	179.8
Ps000294	Unigene0033329	PsMk3-171	LGIII	179.8
Ps000204	Unigene0004476	PsMk3-172	LGIII	180.2
Ps000287	Unigene0042458	PsMk3-173	LGIII	180.2
Ps000114	Unigene0042913	PsMk3-174	LGIII	180.7
Ps000146	Unigene0083698	PsMk3-175	LGIII	181.4
Ps000082	Unigene0048356	PsMk3-176	LGIII	182.5
Ps000470	Unigene0041240	PsMk3-177	LGIII	183.1
Ps000997	Unigene0012436	PsMk3-178	LGIII	183.1
Ps001482	Unigene0044133	PsMk3-179	LGIII	183.1
Ps000222	Unigene0045066	PsMk3-180	LGIII	183.9
Ps000612	Unigene0042635	PsMk3-181	LGIII	183.9
Ps000688	Unigene0016491	PsMk3-182	LGIII	183.9
Ps001022	Unigene0004525	PsMk3-183	LGIII	184.6
Ps000751	Unigene0027953	PsMk3-184	LGIII	187.3
Ps000385	Unigene0005635	PsMk3-185	LGIII	187.7
Ps000387	Unigene0043398	PsMk3-186	LGIII	187.7
Ps000466	Unigene0043152	PsMk3-187	LGIII	187.7
Ps000508	Unigene0049391	PsMk3-188	LGIII	187.7
Ps000525	Unigene0042480	PsMk3-189	LGIII	187.7
Ps000679	Unigene0043398	PsMk3-190	LGIII	189.1
Ps000129	Unigene0047054	PsMk3-191	LGIII	189.9
Ps001181	Unigene0044231	PsMk3-192	LGIII	191.1
Ps000126	Unigene0045192	PsMk3-193	LGIII	191.6
Ps000400	Unigene0086961	PsMk3-194	LGIII	191.6
Ps000446	Unigene0007381	PsMk3-195	LGIII	191.6
Ps000397	Unigene0083846	PsMk3-196	LGIII	193.9
Ps000433	Unigene0041653	PsMk3-197	LGIII	195.1
Ps000738	Unigene0037836	PsMk3-198	LGIII	195.1
Ps000739	Unigene0024778	PsMk3-199	LGIII	195.1
Ps000831	Unigene0043999	PsMk3-200	LGIII	195.1
Ps000604	Unigene0010921	PsMk3-201	LGIII	197.2
Ps000456	Unigene0042087	PsMk3-202	LGIII	197.8
Ps000465	Unigene0028624	PsMk3-203	LGIII	197.8
Ps000561	Unigene0015988	PsMk3-204	LGIII	197.8
Ps000752	Unigene0004143	PsMk3-205	LGIII	197.8
Ps001768	Unigene0042087	PsMk3-206	LGIII	197.8
Ps000506	Unigene0049088	PsMk3-207	LGIII	199.3
Ps000205	Unigene0044552	PsMk4-1	LGIV	0
Ps000928	Unigene0010838	PsMk4-2	LGIV	0.7
Ps000935	Unigene0042459	PsMk4-3	LGIV	0.7
Ps001043	Unigene0004172	PsMk4-4	LGIV	0.7
Ps000815	Unigene0015806	PsMk4-5	LGIV	3
Ps001456	Unigene0037968	PsMk4-6	LGIV	4.4
Ps001758	Unigene0036160	PsMk4-7	LGIV	4.4
Ps001868	Unigene0011284	PsMk4-8	LGIV	5.5
Ps001584	Unigene0007099	PsMk4-9	LGIV	6.2
Ps001592	Unigene0048065	PsMk4-10	LGIV	6.2
Ps001635	Unigene0009861	PsMk4-11	LGIV	6.2
Ps001057	Unigene0033635	PsMk4-12	LGIV	6.3
Ps000203	Unigene0033634	PsMk4-13	LGIV	6.6
Ps000216	Unigene0047076	PsMk4-14	LGIV	6.6
Ps000842	Unigene0018892	PsMk4-15	LGIV	7.1
Ps001610	Unigene0084161	PsMk4-16	LGIV	8.5
Ps001657	Unigene0036531	PsMk4-17	LGIV	8.5
Ps001491	Unigene0059111	PsMk4-18	LGIV	8.9
Ps001780	Unigene0046751	PsMk4-19	LGIV	9.7
Ps001555	Unigene0041343	PsMk4-20	LGIV	10.6
Ps001898	Unigene0048307	PsMk4-21	LGIV	11.8
Ps001664	Unigene0043524	PsMk4-22	LGIV	12.4
Ps001613	Unigene0004142	PsMk4-23	LGIV	13.2
Ps000556	Unigene0018420	PsMk4-24	LGIV	20.6
Ps000631	Unigene0042086	PsMk4-25	LGIV	20.6
Ps000700	Unigene0057985	PsMk4-26	LGIV	21.6
Ps001574	Unigene0028632	PsMk4-27	LGIV	22.8
Ps001619	Unigene0016921	PsMk4-28	LGIV	23.7
Ps001708	Unigene0041308	PsMk4-29	LGIV	25.9
Ps001749	Unigene0013108	PsMk4-30	LGIV	25.9
Ps001839	Unigene0044258	PsMk4-31	LGIV	25.9
Ps001866	Unigene0007210	PsMk4-32	LGIV	25.9
Ps001591	Unigene0004362	PsMk4-33	LGIV	27.3
Ps001679	Unigene0042817	PsMk4-34	LGIV	27.3
Ps001674	Unigene0060233	PsMk4-35	LGIV	35.1
Ps000067	Unigene0030104	PsMk4-36	LGIV	38.8
Ps000141	Unigene0004155	PsMk4-37	LGIV	39
Ps000177	Unigene0042727	PsMk4-38	LGIV	39.6
Ps001564	Unigene0062266	PsMk4-39	LGIV	41.7
Ps000317	Unigene0049208	PsMk4-40	LGIV	42.5
Ps001903	Unigene0044671	PsMk4-41	LGIV	43.4
Ps001281	Unigene0042792	PsMk4-42	LGIV	44.3
Ps000452	Unigene0047900	PsMk4-43	LGIV	45.9
Ps001300	Unigene0045781	PsMk4-44	LGIV	46.4
Ps000254	Unigene0019206	PsMk4-45	LGIV	46.9
Ps000051	Unigene0042017	PsMk4-46	LGIV	48.7
Ps001887	Unigene0083638	PsMk4-47	LGIV	51
Ps001541	Unigene0020889	PsMk4-48	LGIV	51.8
Ps001710	Unigene0043469	PsMk4-49	LGIV	51.8
Ps001736	Unigene0014242	PsMk4-50	LGIV	51.8
Ps001566	Unigene0044462	PsMk4-51	LGIV	52.2
Ps001579	Unigene0050945	PsMk4-52	LGIV	52.2
Ps001543	Unigene0019005	PsMk4-53	LGIV	58.7
Ps001547	Unigene0030108	PsMk4-54	LGIV	58.7
Ps001671	Unigene0019006	PsMk4-55	LGIV	58.7
Ps001734	Unigene0046204	PsMk4-56	LGIV	58.7
Ps001800	Unigene0010869	PsMk4-57	LGIV	58.7
Ps001859	Unigene0046204	PsMk4-58	LGIV	58.7
Ps000315	Unigene0042216	PsMk4-59	LGIV	58.9
Ps001025	Unigene0047712	PsMk4-60	LGIV	58.9
Ps001714	Unigene0017705	PsMk4-61	LGIV	58.9
Ps001621	Unigene0053966	PsMk4-62	LGIV	60.9
Ps001805	Unigene0006932	PsMk4-63	LGIV	61.1
Ps000111	Unigene0005558	PsMk4-64	LGIV	61.5
Ps001857	Unigene0044612	PsMk4-65	LGIV	61.5
Ps000086	Unigene0086221	PsMk4-66	LGIV	62.3
Ps001605	Unigene0046721	PsMk4-67	LGIV	63.5
Ps001724	Unigene0021695	PsMk4-68	LGIV	63.7
Ps000975	Unigene0017112	PsMk4-69	LGIV	65.1
Ps001069	Unigene0035647	PsMk4-70	LGIV	65.6
Ps001417	Unigene0010871	PsMk4-71	LGIV	65.6
Ps001464	Unigene0041843	PsMk4-72	LGIV	65.6
Ps001744	Unigene0046924	PsMk4-73	LGIV	67.3
Ps001723	Unigene0019732	PsMk4-74	LGIV	67.7
Ps001685	Unigene0049594	PsMk4-75	LGIV	69.7
Ps000496	Unigene0086315	PsMk4-76	LGIV	70.6
Ps001663	Unigene0084268	PsMk4-77	LGIV	70.6
Ps001763	Unigene0008783	PsMk4-78	LGIV	71.5
Ps001905	Unigene0045308	PsMk4-79	LGIV	72.1
Ps001814	Unigene0043163	PsMk4-80	LGIV	77.1
Ps001876	Unigene0044556	PsMk4-81	LGIV	77.1
Ps001742	Unigene0085891	PsMk4-82	LGIV	78.5
Ps000512	Unigene0042437	PsMk4-83	LGIV	79
Ps000816	Unigene0020739	PsMk4-84	LGIV	79
Ps001881	Unigene0084652	PsMk4-85	LGIV	81
Ps001658	Unigene0042929	PsMk4-86	LGIV	93.5
Ps000900	Unigene0007314	PsMk4-87	LGIV	97.2
Ps001011	Unigene0044309	PsMk4-88	LGIV	99.7
Ps001914	Unigene0047977	PsMk4-89	LGIV	99.7
Ps001630	Unigene0009595	PsMk4-90	LGIV	102.6
Ps001676	Unigene0008791	PsMk4-91	LGIV	103
Ps001689	Unigene0006910	PsMk4-92	LGIV	103
Ps001265	Unigene0047962	PsMk4-93	LGIV	104.8
Ps001578	Unigene0047962	PsMk4-94	LGIV	104.8
Ps001760	Unigene0043108	PsMk4-95	LGIV	104.8
Ps001916	Unigene0041417	PsMk4-96	LGIV	104.8
Ps001648	Unigene0014804	PsMk4-97	LGIV	105.9
Ps001750	Unigene0048799	PsMk4-98	LGIV	105.9
Ps001764	Unigene0003902	PsMk4-99	LGIV	105.9
Ps001860	Unigene0025640	PsMk4-100	LGIV	105.9
Ps001570	Unigene0046763	PsMk4-101	LGIV	106
Ps001581	Unigene0043638	PsMk4-102	LGIV	106
Ps001646	Unigene0004114	PsMk4-103	LGIV	106
Ps001819	Unigene0025640	PsMk4-104	LGIV	106
Ps001746	Unigene0046072	PsMk4-105	LGIV	106.2
Ps001770	Unigene0042679	PsMk4-106	LGIV	107.4
Ps001822	Unigene0042000	PsMk4-107	LGIV	108.5
Ps001589	Unigene0041892	PsMk4-108	LGIV	109.1
Ps001759	Unigene0010767	PsMk4-109	LGIV	109.1
Ps001810	Unigene0010204	PsMk4-110	LGIV	109.1
Ps001827	Unigene0042717	PsMk4-111	LGIV	109.1
Ps001858	Unigene0044660	PsMk4-112	LGIV	109.1
Ps001873	Unigene0042424	PsMk4-113	LGIV	110.4
Ps001565	Unigene0044635	PsMk4-114	LGIV	110.8
Ps001628	Unigene0041979	PsMk4-115	LGIV	110.8
Ps001892	Unigene0045727	PsMk4-116	LGIV	110.8
Ps001372	Unigene0004031	PsMk4-117	LGIV	112
Ps001818	Unigene0019016	PsMk4-118	LGIV	112
Ps001896	Unigene0009008	PsMk4-119	LGIV	112
Ps001548	Unigene0041424	PsMk4-120	LGIV	113.6
Ps001686	Unigene0043082	PsMk4-121	LGIV	113.6
Ps001911	Unigene0043105	PsMk4-122	LGIV	113.6
Ps000215	Unigene0051871	PsMk4-123	LGIV	114.3
Ps000481	Unigene0009822	PsMk4-124	LGIV	114.3
Ps001540	Unigene0006244	PsMk4-125	LGIV	114.3
Ps000559	Unigene0055618	PsMk4-126	LGIV	115
Ps000731	Unigene0084537	PsMk4-127	LGIV	115
Ps001748	Unigene0044158	PsMk4-128	LGIV	117.2
Ps000789	Unigene0043324	PsMk4-129	LGIV	117.4
Ps001919	Unigene0006892	PsMk4-130	LGIV	117.4
Ps000304	Unigene0016161	PsMk4-131	LGIV	118.1
Ps001317	Unigene0046031	PsMk4-132	LGIV	118.1
Ps001718	Unigene0048681	PsMk4-133	LGIV	118.1
Ps001854	Unigene0012114	PsMk4-134	LGIV	118.1
Ps001743	Unigene0082017	PsMk4-135	LGIV	119.6
Ps001695	Unigene0033054	PsMk4-136	LGIV	119.7
Ps001889	Unigene0026318	PsMk4-137	LGIV	119.8
Ps001553	Unigene0045811	PsMk4-138	LGIV	120
Ps001596	Unigene0084520	PsMk4-139	LGIV	120
Ps001655	Unigene0045565	PsMk4-140	LGIV	120.9
Ps000906	Unigene0005754	PsMk4-141	LGIV	122.1
Ps001127	Unigene0049095	PsMk4-142	LGIV	122.1
Ps001757	Unigene0042346	PsMk4-143	LGIV	123.2
Ps001725	Unigene0043722	PsMk4-144	LGIV	123.6
Ps001567	Unigene0004832	PsMk4-145	LGIV	126.7
Ps001636	Unigene0007757	PsMk4-146	LGIV	126.7
Ps001828	Unigene0005507	PsMk4-147	LGIV	126.7
Ps001632	Unigene0004829	PsMk4-148	LGIV	127.4
Ps001777	Unigene0010539	PsMk4-149	LGIV	127.4
Ps001895	Unigene0017110	PsMk4-150	LGIV	127.4
Ps001680	Unigene0041418	PsMk4-151	LGIV	127.9
Ps001904	Unigene0034891	PsMk4-152	LGIV	127.9
Ps001907	Unigene0043611	PsMk4-153	LGIV	129.1
Ps001761	Unigene0045383	PsMk4-154	LGIV	129.7
Ps001795	Unigene0051836	PsMk4-155	LGIV	129.7
Ps001550	Unigene0045968	PsMk4-156	LGIV	130.6
Ps001554	Unigene0004109	PsMk4-157	LGIV	131.7
Ps000074	Unigene0042767	PsMk4-158	LGIV	148.4
Ps001617	Unigene0044000	PsMk4-159	LGIV	149.6
Ps001878	Unigene0046158	PsMk4-160	LGIV	149.6
Ps001877	Unigene0003982	PsMk4-161	LGIV	151
Ps001626	Unigene0043077	PsMk4-162	LGIV	154.1
Ps001762	Unigene0043339	PsMk4-163	LGIV	154.4
Ps001809	Unigene0026006	PsMk4-164	LGIV	154.4
Ps001690	Unigene0042958	PsMk4-165	LGIV	154.7
Ps000243	Unigene0014566	PsMk4-166	LGIV	163.5
Ps000005	Unigene0009131	PsMk4-167	LGIV	164.4
Ps000380	Unigene0011730	PsMk5-1	LGV	0
Ps000106	Unigene0007798	PsMk5-2	LGV	0.1
Ps000125	Unigene0016788	PsMk5-3	LGV	0.3
Ps000174	Unigene0033084	PsMk5-4	LGV	0.3
Ps001215	Unigene0020381	PsMk5-5	LGV	6.1
Ps001571	Unigene0027932	PsMk5-6	LGV	8.1
Ps001173	Unigene0046060	PsMk5-7	LGV	8.6
Ps001376	Unigene0021506	PsMk5-8	LGV	15
Ps001237	Unigene0015968	PsMk5-9	LGV	15.3
Ps001209	Unigene0005688	PsMk5-10	LGV	16.6
Ps001546	Unigene0005688	PsMk5-11	LGV	16.6
Ps001311	Unigene0062358	PsMk5-12	LGV	17.1
Ps001033	Unigene0044531	PsMk5-13	LGV	18.9
Ps001618	Unigene0041206	PsMk5-14	LGV	18.9
Ps001890	Unigene0041206	PsMk5-15	LGV	18.9
Ps000101	Unigene0033217	PsMk5-16	LGV	24.5
Ps001481	Unigene0049159	PsMk5-17	LGV	25.8
Ps001577	Unigene0048715	PsMk5-18	LGV	25.8
Ps001869	Unigene0048715	PsMk5-19	LGV	25.8
Ps001168	Unigene0086245	PsMk5-20	LGV	27.9
Ps001204	Unigene0004465	PsMk5-21	LGV	27.9
Ps001240	Unigene0043124	PsMk5-22	LGV	27.9
Ps001319	Unigene0041491	PsMk5-23	LGV	27.9
Ps001418	Unigene0036393	PsMk5-24	LGV	27.9
Ps001432	Unigene0044616	PsMk5-25	LGV	27.9
Ps001436	Unigene0037295	PsMk5-26	LGV	27.9
Ps001170	Unigene0013189	PsMk5-27	LGV	32.8
Ps001292	Unigene0008453	PsMk5-28	LGV	39.9
Ps001709	Unigene0083674	PsMk5-29	LGV	39.9
Ps001772	Unigene0041964	PsMk5-30	LGV	39.9
Ps001448	Unigene0005104	PsMk5-31	LGV	40.9
Ps001669	Unigene0005394	PsMk5-32	LGV	42.2
Ps001197	Unigene0041860	PsMk5-33	LGV	42.5
Ps001274	Unigene0044038	PsMk5-34	LGV	42.5
Ps001880	Unigene0043567	PsMk5-35	LGV	42.5
Ps001830	Unigene0002846	PsMk5-36	LGV	43.4
Ps000197	Unigene0037245	PsMk5-37	LGV	45.5
Ps001829	Unigene0012063	PsMk5-38	LGV	52.8
Ps000050	Unigene0036907	PsMk5-39	LGV	53.4
Ps000901	Unigene0041297	PsMk5-40	LGV	53.4
Ps000491	Unigene0083953	PsMk5-41	LGV	54.3
Ps000732	Unigene0003772	PsMk5-42	LGV	54.3
Ps000124	Unigene0046558	PsMk5-43	LGV	55.2
Ps001242	Unigene0027790	PsMk5-44	LGV	56.2
Ps001250	Unigene0050307	PsMk5-45	LGV	56.2
Ps001350	Unigene0027791	PsMk5-46	LGV	56.2
Ps001532	Unigene0027791	PsMk5-47	LGV	56.2
Ps001598	Unigene0027793	PsMk5-48	LGV	56.2
Ps001855	Unigene0027793	PsMk5-49	LGV	56.2
Ps001402	Unigene0027790	PsMk5-50	LGV	56.3
Ps001557	Unigene0027790	PsMk5-51	LGV	56.5
Ps001336	Unigene0043549	PsMk5-52	LGV	60.5
Ps000353	Unigene0041461	PsMk5-53	LGV	62
Ps001301	Unigene0044385	PsMk5-54	LGV	63.1
Ps001303	Unigene0008373	PsMk5-55	LGV	63.1
Ps001500	Unigene0042315	PsMk5-56	LGV	63.1
Ps000570	Unigene0042538	PsMk5-57	LGV	65.1
Ps001211	Unigene0042603	PsMk5-58	LGV	66
Ps001504	Unigene0042291	PsMk5-59	LGV	67.4
Ps001201	Unigene0009772	PsMk5-60	LGV	67.6
Ps001395	Unigene0014195	PsMk5-61	LGV	67.6
Ps001643	Unigene0044384	PsMk5-62	LGV	67.6
Ps001884	Unigene0005581	PsMk5-63	LGV	67.6
Ps001340	Unigene0048872	PsMk5-64	LGV	69
Ps001458	Unigene0062464	PsMk5-65	LGV	69.9
Ps001551	Unigene0062464	PsMk5-66	LGV	69.9
Ps001862	Unigene0010715	PsMk5-67	LGV	70.4
Ps000027	Unigene0041437	PsMk5-68	LGV	70.7
Ps001142	Unigene0010715	PsMk5-69	LGV	71
Ps001286	Unigene0048124	PsMk5-70	LGV	71
Ps001704	Unigene0016556	PsMk5-71	LGV	71
Ps001207	Unigene0041706	PsMk5-72	LGV	73.3
Ps001460	Unigene0039643	PsMk5-73	LGV	74.4
Ps001506	Unigene0083499	PsMk5-74	LGV	74.4
Ps001222	Unigene0003624	PsMk5-75	LGV	75.4
Ps001405	Unigene0022584	PsMk5-76	LGV	75.4
Ps001692	Unigene0003624	PsMk5-77	LGV	75.4
Ps001169	Unigene0031399	PsMk5-78	LGV	75.9
Ps001446	Unigene0041900	PsMk5-79	LGV	75.9
Ps001257	Unigene0048542	PsMk5-80	LGV	77.2
Ps001421	Unigene0042855	PsMk5-81	LGV	78.6
Ps001479	Unigene0041555	PsMk5-82	LGV	78.6
Ps001498	Unigene0044878	PsMk5-83	LGV	78.6
Ps001343	Unigene0042435	PsMk5-84	LGV	78.8
Ps001511	Unigene0004283	PsMk5-85	LGV	79.1
Ps001256	Unigene0008566	PsMk5-86	LGV	79.2
Ps001260	Unigene0003846	PsMk5-87	LGV	79.3
Ps001306	Unigene0041469	PsMk5-88	LGV	79.3
Ps001445	Unigene0046474	PsMk5-89	LGV	79.6
Ps001400	Unigene0052640	PsMk5-90	LGV	87.3
Ps001414	Unigene0005259	PsMk5-91	LGV	87.5
Ps001454	Unigene0009829	PsMk5-92	LGV	87.6
Ps001396	Unigene0021403	PsMk5-93	LGV	87.7
Ps001261	Unigene0086302	PsMk5-94	LGV	87.8
Ps001338	Unigene0083657	PsMk5-95	LGV	87.8
Ps001478	Unigene0020412	PsMk5-96	LGV	87.8
Ps001411	Unigene0005064	PsMk5-97	LGV	88.4
Ps001253	Unigene0081693	PsMk5-98	LGV	88.8
Ps001307	Unigene0060335	PsMk5-99	LGV	88.8
Ps001313	Unigene0041548	PsMk5-100	LGV	88.8
Ps001180	Unigene0004700	PsMk5-101	LGV	89.2
Ps001273	Unigene0041632	PsMk5-102	LGV	90
Ps001470	Unigene0046005	PsMk5-103	LGV	90
Ps001523	Unigene0043138	PsMk5-104	LGV	90
Ps001290	Unigene0059211	PsMk5-105	LGV	90.4
Ps001296	Unigene0042830	PsMk5-106	LGV	91.3
Ps001335	Unigene0005417	PsMk5-107	LGV	91.3
Ps001473	Unigene0010063	PsMk5-108	LGV	91.3
Ps001536	Unigene0007758	PsMk5-109	LGV	91.3
Ps001283	Unigene0045685	PsMk5-110	LGV	92.2
Ps001295	Unigene0003766	PsMk5-111	LGV	93.5
Ps001404	Unigene0041367	PsMk5-112	LGV	93.5
Ps001517	Unigene0043231	PsMk5-113	LGV	95.1
Ps001284	Unigene0022154	PsMk5-114	LGV	95.4
Ps001255	Unigene0010897	PsMk5-115	LGV	95.7
Ps001406	Unigene0012402	PsMk5-116	LGV	96
Ps001542	Unigene0083747	PsMk5-117	LGV	103.6
Ps001872	Unigene0041224	PsMk5-118	LGV	104.8
Ps001639	Unigene0009981	PsMk5-119	LGV	106.3
Ps001851	Unigene0043503	PsMk5-120	LGV	106.3
Ps001918	Unigene0046113	PsMk5-121	LGV	106.3
Ps000318	Unigene0045057	PsMk5-122	LGV	110.8
Ps000961	Unigene0044918	PsMk5-123	LGV	111.5
Ps001910	Unigene0010262	PsMk5-124	LGV	113.1
Ps000558	Unigene0042925	PsMk5-125	LGV	116
Ps001191	Unigene0050838	PsMk5-126	LGV	116
Ps001562	Unigene0007912	PsMk5-127	LGV	116
Ps001594	Unigene0055805	PsMk5-128	LGV	116
Ps001756	Unigene0055805	PsMk5-129	LGV	116
Ps001813	Unigene0017106	PsMk5-130	LGV	116
Ps001820	Unigene0017367	PsMk5-131	LGV	116
Ps001875	Unigene0048611	PsMk5-132	LGV	116.8
Ps001568	Unigene0083991	PsMk5-133	LGV	117.2
Ps001778	Unigene0020422	PsMk5-134	LGV	117.2
Ps001856	Unigene0044528	PsMk5-135	LGV	117.2
Ps001745	Unigene0042254	PsMk5-136	LGV	119.4
Ps000200	Unigene0026528	PsMk5-137	LGV	120
Ps001715	Unigene0041315	PsMk5-138	LGV	121.1
Ps000007	Unigene0014125	PsMk5-139	LGV	125.1
Ps001677	Unigene0004598	PsMk5-140	LGV	125.1
Ps001649	Unigene0045019	PsMk5-141	LGV	129.2
Ps001794	Unigene0010188	PsMk5-142	LGV	129.2
Ps001575	Unigene0017423	PsMk5-143	LGV	129.9
Ps001582	Unigene0084101	PsMk5-144	LGV	129.9
Ps001867	Unigene0003281	PsMk5-145	LGV	130.9
Ps001781	Unigene0017520	PsMk5-146	LGV	132.9
Ps000117	Unigene0085865	PsMk5-147	LGV	133.1
Ps000161	Unigene0041883	PsMk5-148	LGV	133.8
Ps000391	Unigene0045362	PsMk5-149	LGV	133.9
Ps001701	Unigene0056810	PsMk5-150	LGV	133.9
Ps000296	Unigene0015905	PsMk5-151	LGV	135.2
Ps000188	Unigene0071371	PsMk5-152	LGV	135.3
Ps000370	Unigene0084615	PsMk5-153	LGV	135.8
Ps000870	Unigene0022680	PsMk5-154	LGV	135.8
Ps001811	Unigene0049802	PsMk5-155	LGV	135.8
Ps000119	Unigene0004731	PsMk5-156	LGV	136.2
Ps000284	Unigene0045815	PsMk5-157	LGV	136.2
Ps000535	Unigene0005066	PsMk5-158	LGV	136.2
Ps001837	Unigene0006238	PsMk5-159	LGV	136.7
Ps001806	Unigene0019758	PsMk5-160	LGV	137.2
Ps001641	Unigene0048227	PsMk5-161	LGV	138.1
Ps001572	Unigene0041470	PsMk5-162	LGV	138.4
Ps001888	Unigene0043765	PsMk5-163	LGV	138.4
Ps001588	Unigene0087015	PsMk5-164	LGV	138.7
Ps001612	Unigene0002693	PsMk5-165	LGV	138.7
Ps001697	Unigene0045413	PsMk5-166	LGV	138.7
Ps001673	Unigene0004414	PsMk5-167	LGV	140.4
Ps001776	Unigene0012364	PsMk5-168	LGV	145.7
Ps001817	Unigene0012363	PsMk5-169	LGV	145.7
Ps000047	Unigene0042906	PsMk5-170	LGV	149.2
Ps000356	Unigene0027280	PsMk5-171	LGV	149.2
Ps001039	Unigene0044548	PsMk5-172	LGV	149.2
Ps001824	Unigene0003811	PsMk5-173	LGV	149.6
Ps001733	Unigene0086590	PsMk5-174	LGV	151.3
Ps001804	Unigene0028946	PsMk5-175	LGV	151.3
Ps001841	Unigene0002446	PsMk5-176	LGV	153.4
Ps001706	Unigene0084866	PsMk5-177	LGV	154.5
Ps001593	Unigene0045378	PsMk5-178	LGV	155.7
Ps001773	Unigene0044218	PsMk5-179	LGV	155.7
Ps000225	Unigene0043634	PsMk6-1	LGVI	9.9
Ps000737	Unigene0041806	PsMk6-2	LGVI	9.9
Ps001608	Unigene0042751	PsMk6-3	LGVI	9.9
Ps000237	Unigene0026757	PsMk6-4	LGVI	10.1
Ps000354	Unigene0047461	PsMk6-5	LGVI	10.1
Ps000286	Unigene0084900	PsMk6-6	LGVI	10.5
Ps000031	Unigene0045000	PsMk6-7	LGVI	10.6
Ps000282	Unigene0015007	PsMk6-8	LGVI	11
Ps000094	Unigene0063490	PsMk6-9	LGVI	11.6
Ps000220	Unigene0084837	PsMk6-10	LGVI	11.6
Ps000340	Unigene0084837	PsMk6-11	LGVI	11.6
Ps001850	Unigene0046111	PsMk6-12	LGVI	11.6
Ps000078	Unigene0041435	PsMk6-13	LGVI	12.1
Ps000219	Unigene0021100	PsMk6-14	LGVI	12.5
Ps000068	Unigene0046528	PsMk6-15	LGVI	12.7
Ps000244	Unigene0006038	PsMk6-16	LGVI	12.7
Ps000211	Unigene0043475	PsMk6-17	LGVI	14.8
Ps001645	Unigene0047024	PsMk6-18	LGVI	20.9
Ps000202	Unigene0041671	PsMk6-19	LGVI	28.3
Ps000232	Unigene0011353	PsMk6-20	LGVI	33.8
Ps000233	Unigene0004740	PsMk6-21	LGVI	34.1
Ps000312	Unigene0044652	PsMk6-22	LGVI	34.3
Ps000091	Unigene0043447	PsMk6-23	LGVI	38.7
Ps000259	Unigene0043494	PsMk6-24	LGVI	39.2
Ps000283	Unigene0087031	PsMk6-25	LGVI	39.2
Ps000918	Unigene0035368	PsMk6-26	LGVI	39.6
Ps000234	Unigene0006631	PsMk6-27	LGVI	40.4
Ps000372	Unigene0009728	PsMk6-28	LGVI	40.4
Ps000004	Unigene0006284	PsMk6-29	LGVI	40.6
Ps000131	Unigene0002868	PsMk6-30	LGVI	40.6
Ps000266	Unigene0042707	PsMk6-31	LGVI	40.6
Ps000362	Unigene0009933	PsMk6-32	LGVI	40.9
Ps000341	Unigene0018127	PsMk6-33	LGVI	41.3
Ps000017	Unigene0050060	PsMk6-34	LGVI	41.5
Ps000257	Unigene0053446	PsMk6-35	LGVI	41.5
Ps001906	Unigene0053446	PsMk6-36	LGVI	41.5
Ps000590	Unigene0041744	PsMk6-37	LGVI	41.6
Ps000110	Unigene0044782	PsMk6-38	LGVI	42.6
Ps000775	Unigene0006077	PsMk6-39	LGVI	42.6
Ps000269	Unigene0044306	PsMk6-40	LGVI	42.8
Ps001009	Unigene0008128	PsMk6-41	LGVI	42.8
Ps001765	Unigene0016562	PsMk6-42	LGVI	51.5
Ps000885	Unigene0051698	PsMk6-43	LGVI	52.3
Ps000548	Unigene0042570	PsMk6-44	LGVI	53.1
Ps001684	Unigene0004353	PsMk6-45	LGVI	53.1
Ps001721	Unigene0042570	PsMk6-46	LGVI	53.1
Ps000064	Unigene0005384	PsMk6-47	LGVI	57.4
Ps001678	Unigene0041299	PsMk6-48	LGVI	57.4
Ps000008	Unigene0042801	PsMk6-49	LGVI	60.7
Ps000379	Unigene0044331	PsMk6-50	LGVI	61.1
Ps001683	Unigene0025730	PsMk6-51	LGVI	62
Ps000030	Unigene0046817	PsMk6-52	LGVI	62.6
Ps000347	Unigene0009346	PsMk6-53	LGVI	62.6
Ps001032	Unigene0043399	PsMk6-54	LGVI	69.4
Ps001393	Unigene0049610	PsMk6-55	LGVI	70.4
Ps001352	Unigene0037441	PsMk6-56	LGVI	71.1
Ps001660	Unigene0037441	PsMk6-57	LGVI	71.1
Ps001775	Unigene0045552	PsMk6-58	LGVI	71.1
Ps000320	Unigene0004161	PsMk6-59	LGVI	71.9
Ps000377	Unigene0008879	PsMk6-60	LGVI	71.9
Ps001442	Unigene0045552	PsMk6-61	LGVI	71.9
Ps001616	Unigene0031198	PsMk6-62	LGVI	71.9
Ps001699	Unigene0077245	PsMk6-63	LGVI	71.9
Ps000035	Unigene0007394	PsMk6-64	LGVI	77.2
Ps001360	Unigene0008772	PsMk6-65	LGVI	77.2
Ps001489	Unigene0077794	PsMk6-66	LGVI	77.2
Ps001552	Unigene0048723	PsMk6-67	LGVI	77.2
Ps000349	Unigene0042399	PsMk6-68	LGVI	81.7
Ps001241	Unigene0011712	PsMk6-69	LGVI	81.7
Ps001894	Unigene0083381	PsMk6-70	LGVI	81.7
Ps000305	Unigene0043407	PsMk6-71	LGVI	83.9
Ps001502	Unigene0061544	PsMk6-72	LGVI	84.4
Ps001431	Unigene0029005	PsMk6-73	LGVI	86.4
Ps001561	Unigene0043239	PsMk6-74	LGVI	86.4
Ps001720	Unigene0002419	PsMk6-75	LGVI	86.4
Ps001186	Unigene0014908	PsMk6-76	LGVI	88.5
Ps001373	Unigene0018482	PsMk6-77	LGVI	88.5
Ps001216	Unigene0014423	PsMk6-78	LGVI	88.6
Ps001413	Unigene0034261	PsMk6-79	LGVI	88.6
Ps000933	Unigene0050666	PsMk6-80	LGVI	89.9
Ps001160	Unigene0076637	PsMk6-81	LGVI	89.9
Ps001176	Unigene0049359	PsMk6-82	LGVI	89.9
Ps001792	Unigene0050666	PsMk6-83	LGVI	89.9
Ps001453	Unigene0046973	PsMk6-84	LGVI	90.2
Ps001463	Unigene0043544	PsMk6-85	LGVI	90.2
Ps000310	Unigene0011532	PsMk6-86	LGVI	90.7
Ps001398	Unigene0007114	PsMk6-87	LGVI	90.7
Ps001320	Unigene0019002	PsMk6-88	LGVI	91.9
Ps000024	Unigene0004470	PsMk6-89	LGVI	92.4
Ps001245	Unigene0017343	PsMk6-90	LGVI	92.4
Ps001468	Unigene0044780	PsMk6-91	LGVI	92.4
Ps001501	Unigene0008582	PsMk6-92	LGVI	92.4
Ps001653	Unigene0011596	PsMk6-93	LGVI	92.4
Ps000671	Unigene0038185	PsMk6-94	LGVI	98.9
Ps001200	Unigene0042661	PsMk6-95	LGVI	98.9
Ps000113	Unigene0043829	PsMk6-96	LGVI	99.2
Ps000274	Unigene0005065	PsMk6-97	LGVI	99.2
Ps001477	Unigene0026759	PsMk6-98	LGVI	99.2
Ps001505	Unigene0045393	PsMk6-99	LGVI	99.2
Ps000402	Unigene0082424	PsMk6-100	LGVI	99.4
Ps000924	Unigene0082424	PsMk6-101	LGVI	99.4
Ps000264	Unigene0012939	PsMk6-102	LGVI	99.8
Ps000140	Unigene0042596	PsMk6-103	LGVI	100.3
Ps000820	Unigene0006953	PsMk6-104	LGVI	101.4
Ps000121	Unigene0004400	PsMk6-105	LGVI	102.1
Ps000703	Unigene0018297	PsMk6-106	LGVI	102.1
Ps001153	Unigene0041347	PsMk6-107	LGVI	102.1
Ps001323	Unigene0019200	PsMk6-108	LGVI	102.1
Ps001510	Unigene0017370	PsMk6-109	LGVI	102.1
Ps001164	Unigene0033340	PsMk6-110	LGVI	104.4
Ps000957	Unigene0085445	PsMk6-111	LGVI	109.6
Ps001821	Unigene0043601	PsMk6-112	LGVI	111.1
Ps000022	Unigene0027867	PsMk6-113	LGVI	111.4
Ps000246	Unigene0036081	PsMk6-114	LGVI	111.4
Ps000263	Unigene0058116	PsMk6-115	LGVI	111.4
Ps001385	Unigene0004558	PsMk6-116	LGVI	111.4
Ps001427	Unigene0008150	PsMk6-117	LGVI	111.4
Ps001474	Unigene0043601	PsMk6-118	LGVI	111.4
Ps000229	Unigene0041871	PsMk6-119	LGVI	114.9
Ps001035	Unigene0045752	PsMk6-120	LGVI	114.9
Ps001787	Unigene0015229	PsMk6-121	LGVI	114.9
Ps001249	Unigene0042074	PsMk6-122	LGVI	115.9
Ps001847	Unigene0007895	PsMk6-123	LGVI	119.1
Ps001280	Unigene0006916	PsMk6-124	LGVI	119.8
Ps000139	Unigene0004028	PsMk6-125	LGVI	123.3
Ps001640	Unigene0008074	PsMk6-126	LGVI	123.3
Ps001726	Unigene0004138	PsMk6-127	LGVI	123.3
Ps001912	Unigene0043280	PsMk6-128	LGVI	123.3
Ps001791	Unigene0046878	PsMk6-129	LGVI	124.8
Ps001130	Unigene0045065	PsMk6-130	LGVI	126.7
Ps000096	Unigene0082830	PsMk6-131	LGVI	128.7
Ps000268	Unigene0012648	PsMk6-132	LGVI	128.7
Ps000273	Unigene0011263	PsMk6-133	LGVI	128.7
Ps001808	Unigene0082830	PsMk6-134	LGVI	128.7
Ps000382	Unigene0045487	PsMk6-135	LGVI	130.1
Ps001717	Unigene0084374	PsMk6-136	LGVI	130.2
Ps000059	Unigene0052977	PsMk6-137	LGVI	131.7
Ps001652	Unigene0052977	PsMk6-138	LGVI	131.7
Ps000333	Unigene0041571	PsMk6-139	LGVI	132
Ps000249	Unigene0017706	PsMk6-140	LGVI	133
Ps001913	Unigene0042544	PsMk6-141	LGVI	133.1
Ps000132	Unigene0045105	PsMk6-142	LGVI	133.7
Ps000714	Unigene0003062	PsMk6-143	LGVI	133.7
Ps001272	Unigene0043391	PsMk6-144	LGVI	134
Ps000107	Unigene0042277	PsMk6-145	LGVI	134.1
Ps000084	Unigene0038457	PsMk6-146	LGVI	134.2
Ps000062	Unigene0018130	PsMk6-147	LGVI	137.4
Ps000171	Unigene0043390	PsMk6-148	LGVI	137.4
Ps000357	Unigene0037371	PsMk6-149	LGVI	137.4
Ps001629	Unigene0043390	PsMk6-150	LGVI	137.4
Ps000195	Unigene0053159	PsMk6-151	LGVI	140.1
Ps001449	Unigene0033514	PsMk6-152	LGVI	141
Ps000760	Unigene0042052	PsMk6-153	LGVI	141.6
Ps000364	Unigene0027039	PsMk6-154	LGVI	141.9
Ps000726	Unigene0042128	PsMk6-155	LGVI	141.9
Ps000486	Unigene0005681	PsMk6-156	LGVI	142.5
Ps000793	Unigene0042275	PsMk7-1	LGVII	0
Ps000808	Unigene0004519	PsMk7-2	LGVII	0.3
Ps000434	Unigene0047343	PsMk7-3	LGVII	0.9
Ps000915	Unigene0083709	PsMk7-4	LGVII	0.9
Ps000822	Unigene0004874	PsMk7-5	LGVII	1.9
Ps001089	Unigene0027245	PsMk7-6	LGVII	4.6
Ps001120	Unigene0042844	PsMk7-7	LGVII	5.3
Ps000937	Unigene0045301	PsMk7-8	LGVII	5.6
Ps000944	Unigene0013192	PsMk7-9	LGVII	5.6
Ps000986	Unigene0042075	PsMk7-10	LGVII	7.1
Ps001036	Unigene0021006	PsMk7-11	LGVII	7.1
Ps000996	Unigene0004727	PsMk7-12	LGVII	7.8
Ps001796	Unigene0053504	PsMk7-13	LGVII	7.8
Ps000966	Unigene0023208	PsMk7-14	LGVII	7.9
Ps001842	Unigene0023208	PsMk7-15	LGVII	7.9
Ps000977	Unigene0086653	PsMk7-16	LGVII	8.3
Ps000866	Unigene0042551	PsMk7-17	LGVII	8.9
Ps000813	Unigene0045219	PsMk7-18	LGVII	9.5
Ps000880	Unigene0009825	PsMk7-19	LGVII	9.5
Ps000968	Unigene0007697	PsMk7-20	LGVII	9.8
Ps000894	Unigene0042698	PsMk7-21	LGVII	10.4
Ps000948	Unigene0045243	PsMk7-22	LGVII	12.8
Ps000826	Unigene0042049	PsMk7-23	LGVII	14.9
Ps000835	Unigene0007417	PsMk7-24	LGVII	14.9
Ps000883	Unigene0004631	PsMk7-25	LGVII	14.9
Ps000893	Unigene0027721	PsMk7-26	LGVII	14.9
Ps001021	Unigene0004506	PsMk7-27	LGVII	14.9
Ps001050	Unigene0083012	PsMk7-28	LGVII	14.9
Ps001152	Unigene0041495	PsMk7-29	LGVII	14.9
Ps000791	Unigene0005069	PsMk7-30	LGVII	18.6
Ps001010	Unigene0005059	PsMk7-31	LGVII	18.6
Ps000324	Unigene0003176	PsMk7-32	LGVII	19.1
Ps000781	Unigene0083729	PsMk7-33	LGVII	19.8
Ps001024	Unigene0041404	PsMk7-34	LGVII	22
Ps000843	Unigene0041594	PsMk7-35	LGVII	29.7
Ps000422	Unigene0048616	PsMk7-36	LGVII	31.9
Ps000787	Unigene0041187	PsMk7-37	LGVII	31.9
Ps000797	Unigene0086190	PsMk7-38	LGVII	31.9
Ps001002	Unigene0048636	PsMk7-39	LGVII	31.9
Ps001042	Unigene0043182	PsMk7-40	LGVII	31.9
Ps001080	Unigene0041636	PsMk7-41	LGVII	31.9
Ps001244	Unigene0048616	PsMk7-42	LGVII	31.9
Ps000947	Unigene0031776	PsMk7-43	LGVII	32.4
Ps001125	Unigene0062194	PsMk7-44	LGVII	34.2
Ps000718	Unigene0043013	PsMk7-45	LGVII	38.3
Ps000780	Unigene0008996	PsMk7-46	LGVII	38.3
Ps001087	Unigene0019655	PsMk7-47	LGVII	38.3
Ps001095	Unigene0041292	PsMk7-48	LGVII	39.6
Ps001150	Unigene0041499	PsMk7-49	LGVII	39.6
Ps000922	Unigene0009561	PsMk7-50	LGVII	40.1
Ps000785	Unigene0051344	PsMk7-51	LGVII	40.7
Ps000936	Unigene0034070	PsMk7-52	LGVII	40.7
Ps000864	Unigene0015680	PsMk7-53	LGVII	42.1
Ps001135	Unigene0003376	PsMk7-54	LGVII	42.4
Ps000884	Unigene0038028	PsMk7-55	LGVII	43
Ps000865	Unigene0022292	PsMk7-56	LGVII	46.4
Ps001071	Unigene0043958	PsMk7-57	LGVII	47
Ps001497	Unigene0025188	PsMk7-58	LGVII	50.3
Ps000271	Unigene0049855	PsMk7-59	LGVII	50.4
Ps000492	Unigene0048664	PsMk7-60	LGVII	50.6
Ps000522	Unigene0050023	PsMk7-61	LGVII	50.6
Ps000575	Unigene0044009	PsMk7-62	LGVII	50.6
Ps000634	Unigene0043417	PsMk7-63	LGVII	50.6
Ps000624	Unigene0041906	PsMk7-64	LGVII	52.3
Ps001028	Unigene0043066	PsMk7-65	LGVII	52.3
Ps000995	Unigene0042030	PsMk7-66	LGVII	53.2
Ps000839	Unigene0042018	PsMk7-67	LGVII	53.4
Ps000926	Unigene0038832	PsMk7-68	LGVII	53.4
Ps001060	Unigene0042203	PsMk7-69	LGVII	53.4
Ps000907	Unigene0048231	PsMk7-70	LGVII	55.3
Ps001073	Unigene0043338	PsMk7-71	LGVII	55.3
Ps001140	Unigene0050529	PsMk7-72	LGVII	56.2
Ps000874	Unigene0004380	PsMk7-73	LGVII	57
Ps001093	Unigene0007858	PsMk7-74	LGVII	57
Ps001115	Unigene0004480	PsMk7-75	LGVII	57
Ps001065	Unigene0010142	PsMk7-76	LGVII	58.6
Ps000770	Unigene0046090	PsMk7-77	LGVII	59.4
Ps000945	Unigene0002470	PsMk7-78	LGVII	59.4
Ps000989	Unigene0012296	PsMk7-79	LGVII	59.4
Ps001014	Unigene0082879	PsMk7-80	LGVII	59.4
Ps001111	Unigene0008568	PsMk7-81	LGVII	60.7
Ps000619	Unigene0044529	PsMk7-82	LGVII	61.6
Ps000557	Unigene0046692	PsMk7-83	LGVII	63
Ps000366	Unigene0009735	PsMk7-84	LGVII	68.9
Ps000136	Unigene0042555	PsMk7-85	LGVII	69.3
Ps000275	Unigene0012232	PsMk7-86	LGVII	70.7
Ps000207	Unigene0085982	PsMk7-87	LGVII	71.6
Ps000056	Unigene0045457	PsMk7-88	LGVII	72.9
Ps001017	Unigene0043178	PsMk7-89	LGVII	72.9
Ps000170	Unigene0052286	PsMk7-90	LGVII	76.4
Ps000240	Unigene0046325	PsMk7-91	LGVII	76.4
Ps001383	Unigene0030322	PsMk7-92	LGVII	76.4
Ps001599	Unigene0030323	PsMk7-93	LGVII	76.4
Ps000358	Unigene0044167	PsMk7-94	LGVII	76.6
Ps001270	Unigene0045013	PsMk7-95	LGVII	76.6
Ps001861	Unigene0003743	PsMk7-96	LGVII	76.6
Ps000801	Unigene0007193	PsMk7-97	LGVII	80.2
Ps000862	Unigene0005025	PsMk7-98	LGVII	80.2
Ps000876	Unigene0021106	PsMk7-99	LGVII	80.2
Ps001604	Unigene0045103	PsMk7-100	LGVII	80.2
Ps000326	Unigene0042939	PsMk7-101	LGVII	92.5
Ps000148	Unigene0044494	PsMk7-102	LGVII	92.8
Ps000157	Unigene0004651	PsMk7-103	LGVII	92.8
Ps000857	Unigene0043736	PsMk7-104	LGVII	99.3
Ps000919	Unigene0042700	PsMk7-105	LGVII	99.3
Ps001081	Unigene0041750	PsMk7-106	LGVII	99.3
Ps000871	Unigene0026569	PsMk7-107	LGVII	99.8
Ps000970	Unigene0042673	PsMk7-108	LGVII	99.8
Ps000982	Unigene0013933	PsMk7-109	LGVII	99.8
Ps001003	Unigene0026571	PsMk7-110	LGVII	99.8
Ps000993	Unigene0001826	PsMk7-111	LGVII	100.9
Ps000790	Unigene0082065	PsMk7-112	LGVII	101.2
Ps000882	Unigene0041522	PsMk7-113	LGVII	101.2
Ps000938	Unigene0040806	PsMk7-114	LGVII	101.2
Ps000897	Unigene0011283	PsMk7-115	LGVII	101.6
Ps001004	Unigene0046213	PsMk7-116	LGVII	101.6
Ps001030	Unigene0048655	PsMk7-117	LGVII	101.8
Ps001103	Unigene0045063	PsMk7-118	LGVII	101.8
Ps001048	Unigene0041913	PsMk7-119	LGVII	102.3
Ps000828	Unigene0045558	PsMk7-120	LGVII	104.4
Ps001494	Unigene0011390	PsMk7-121	LGVII	104.6
Ps000245	Unigene0033992	PsMk7-122	LGVII	104.9
Ps000810	Unigene0019049	PsMk7-123	LGVII	104.9
Ps000891	Unigene0009529	PsMk7-124	LGVII	104.9
Ps000896	Unigene0043620	PsMk7-125	LGVII	104.9
Ps000946	Unigene0008204	PsMk7-126	LGVII	105.6
Ps000931	Unigene0011424	PsMk7-127	LGVII	105.8
Ps001347	Unigene0044175	PsMk7-128	LGVII	105.8
Ps000848	Unigene0021867	PsMk7-129	LGVII	109.6
Ps000773	Unigene0045705	PsMk7-130	LGVII	111.1
Ps001104	Unigene0023550	PsMk7-131	LGVII	113.7
Ps001116	Unigene0011277	PsMk7-132	LGVII	115.8
Ps001066	Unigene0022872	PsMk7-133	LGVII	119.3
Ps000942	Unigene0044071	PsMk7-134	LGVII	121.9
Ps000964	Unigene0044807	PsMk7-135	LGVII	121.9
Ps000814	Unigene0044819	PsMk7-136	LGVII	122.9
Ps000850	Unigene0002799	PsMk7-137	LGVII	122.9
Ps000044	Unigene0004223	PsMk7-138	LGVII	123.5
Ps000281	Unigene0042299	PsMk7-139	LGVII	123.5
Ps000973	Unigene0003397	PsMk7-140	LGVII	123.5
Ps000660	Unigene0050686	PsMk7-141	LGVII	125.3
Ps001054	Unigene0034222	PsMk7-142	LGVII	125.3
Ps000807	Unigene0011691	PsMk7-143	LGVII	125.5
Ps001020	Unigene0002895	PsMk7-144	LGVII	127
Ps001101	Unigene0034506	PsMk7-145	LGVII	127.4
Ps000979	Unigene0015400	PsMk7-146	LGVII	128.9
Ps001049	Unigene0002900	PsMk7-147	LGVII	128.9
Ps001782	Unigene0038023	PsMk7-148	LGVII	132.1
Ps000776	Unigene0011670	PsMk7-149	LGVII	135.5
Ps000908	Unigene0044763	PsMk7-150	LGVII	135.5
Ps000921	Unigene0041741	PsMk7-151	LGVII	135.5
Ps000954	Unigene0046432	PsMk7-152	LGVII	135.5
Ps001076	Unigene0008703	PsMk7-153	LGVII	135.5
Ps001109	Unigene0044890	PsMk7-154	LGVII	135.5
Ps000834	Unigene0041791	PsMk7-155	LGVII	135.9
Ps000861	Unigene0006250	PsMk7-156	LGVII	135.9
Ps000962	Unigene0006223	PsMk7-157	LGVII	135.9
Ps000836	Unigene0044375	PsMk7-158	LGVII	136.1
Ps000454	Unigene0011498	PsMk7-159	LGVII	136.3
Ps000568	Unigene0006223	PsMk7-160	LGVII	136.3
Ps000851	Unigene0009983	PsMk7-161	LGVII	136.5
Ps000010	Unigene0044177	PsMk7-162	LGVII	137
Ps000533	Unigene0050483	PsMk7-163	LGVII	137
Ps000553	Unigene0006057	PsMk7-164	LGVII	137
Ps001633	Unigene0004888	PsMk7-165	LGVII	137
Ps001637	Unigene0030315	PsMk7-166	LGVII	137
Ps000716	Unigene0024773	PsMk7-167	LGVII	137.9
Ps000676	Unigene0043463	PsMk7-168	LGVII	144.7
Ps000691	Unigene0041737	PsMk7-169	LGVII	147
Ps000627	Unigene0041754	PsMk7-170	LGVII	147.5
Ps000019	Unigene0040864	PsMk7-171	LGVII	148.4
Ps000069	Unigene0041579	PsMk7-172	LGVII	148.4
Ps000432	Unigene0041730	PsMk7-173	LGVII	149.8
Ps000295	Unigene0043051	PsMk7-174	LGVII	150.9
Ps000314	Unigene0042109	PsMk7-175	LGVII	150.9
Ps000917	Unigene0044541	PsMk7-176	LGVII	150.9
Ps000437	Unigene0006180	PsMk7-177	LGVII	151.1
Ps001263	Unigene0045497	PsMk7-178	LGVII	151.1
Ps001569	Unigene0045006	PsMk7-179	LGVII	151.1
Ps001560	Unigene0044940	PsMk7-180	LGVII	151.3
Ps000659	Unigene0041236	PsMk7-181	LGVII	152.8
Ps000516	Unigene0042898	PsMk7-182	LGVII	160.1
Ps001788	Unigene0004032	PsMk7-183	LGVII	160.1
Ps000478	Unigene0043273	PsMk7-184	LGVII	160.3
Ps000513	Unigene0084925	PsMk7-185	LGVII	160.3
Ps000572	Unigene0041264	PsMk7-186	LGVII	160.3
Ps000606	Unigene0084925	PsMk7-187	LGVII	160.3
Ps000972	Unigene0004054	PsMk7-188	LGVII	161.4
Ps000898	Unigene0044650	PsMk7-189	LGVII	161.6
Ps001108	Unigene0004018	PsMk7-190	LGVII	161.7
Ps000723	Unigene0008496	PsMk7-191	LGVII	162.3
Ps000798	Unigene0042326	PsMk7-192	LGVII	162.3
Ps000821	Unigene0050321	PsMk7-193	LGVII	162.3
Ps000888	Unigene0042224	PsMk7-194	LGVII	162.3
Ps001077	Unigene0004623	PsMk7-195	LGVII	162.5
Ps000639	Unigene0004900	PsMk7-196	LGVII	163.3
Ps000965	Unigene0042161	PsMk7-197	LGVII	171.5
Ps000532	Unigene0003757	PsMk7-198	LGVII	174
Ps000956	Unigene0004565	PsMk7-199	LGVII	176
Ps001713	Unigene0043840	PsMk7-200	LGVII	176
Ps001823	Unigene0014461	PsMk7-201	LGVII	176
Ps000180	Unigene0037603	PsMk7-202	LGVII	176.3
Ps000741	Unigene0032732	PsMk7-203	LGVII	178.2
Ps000482	Unigene0040796	PsMk7-204	LGVII	178.4
Ps000636	Unigene0035817	PsMk7-205	LGVII	178.6
Ps000580	Unigene0083022	PsMk7-206	LGVII	182
Ps000638	Unigene0045598	PsMk7-207	LGVII	182
Ps000951	Unigene0049953	PsMk7-208	LGVII	182
Ps001624	Unigene0083022	PsMk7-209	LGVII	182
Ps000519	Unigene0009080	PsMk7-210	LGVII	183.2
Ps000531	Unigene0046954	PsMk7-211	LGVII	183.2
Ps001403	Unigene0004409	PsMk7-212	LGVII	183.2
Ps001779	Unigene0009080	PsMk7-213	LGVII	183.2
Ps001607	Unigene0038094	PsMk7-214	LGVII	183.4
Ps000276	Unigene0042334	PsMk7-215	LGVII	187.7
Ps000421	Unigene0048436	PsMk7-216	LGVII	187.7
Ps000459	Unigene0004173	PsMk7-217	LGVII	191.4
Ps001006	Unigene0018227	PsMk7-218	LGVII	191.4
Ps001838	Unigene0008008	PsMk7-219	LGVII	191.4
Ps001885	Unigene0016117	PsMk7-220	LGVII	191.4
Ps000405	Unigene0025244	PsMk7-221	LGVII	194.2
Ps000656	Unigene0023779	PsMk7-222	LGVII	199.1
Ps000464	Unigene0044937	PsMk7-223	LGVII	200.6
Ps000665	Unigene0043502	PsMk7-224	LGVII	200.9
Ps000657	Unigene0004875	PsMk7-225	LGVII	204.3
Ps001308	Unigene0010119	PsMk7-226	LGVII	204.6
Ps000474	Unigene0022150	PsMk7-227	LGVII	205.1
Ps000674	Unigene0002006	PsMk7-228	LGVII	205.5
Ps001366	Unigene0004802	PsMk7-229	LGVII	205.5
Ps000375	Unigene0044128	PsMk7-230	LGVII	205.8
Ps000453	Unigene0042398	PsMk7-231	LGVII	205.8
Ps000578	Unigene0004931	PsMk7-232	LGVII	205.8
Ps000701	Unigene0038430	PsMk7-233	LGVII	205.8
Ps001444	Unigene0003922	PsMk7-234	LGVII	205.8
Ps000702	Unigene0009936	PsMk7-235	LGVII	206.8
Ps000569	Unigene0052073	PsMk7-236	LGVII	207.4
Ps001230	Unigene0010990	PsMk7-237	LGVII	207.4
Ps001729	Unigene0041427	PsMk7-238	LGVII	207.9
Ps001392	Unigene0020484	PsMk7-239	LGVII	208.2
Ps000577	Unigene0006040	PsMk7-240	LGVII	213.3
Ps000413	Unigene0008696	PsMk7-241	LGVII	215.1
Ps001580	Unigene0045199	PsMk7-242	LGVII	215.1
Ps000393	Unigene0010223	PsMk7-243	LGVII	216.4
Ps000543	Unigene0042561	PsMk7-244	LGVII	216.8
Ps000550	Unigene0009329	PsMk7-245	LGVII	217.2
Ps000720	Unigene0042978	PsMk7-246	LGVII	217.2
Ps000614	Unigene0003169	PsMk7-247	LGVII	218.9
Ps000109	Unigene0042489	PsMk7-248	LGVII	219.4
Ps000256	Unigene0003770	PsMk7-249	LGVII	219.4
Ps000363	Unigene0003913	PsMk7-250	LGVII	219.4
Ps000879	Unigene0009953	PsMk7-251	LGVII	219.8
Ps000912	Unigene0004863	PsMk7-252	LGVII	219.8
Ps001055	Unigene0046248	PsMk7-253	LGVII	219.8
Ps001675	Unigene0041966	PsMk7-254	LGVII	219.8
