# Supplementary material for: High-Throughput RNA-Seq Data Analysis of the Single Nucleotide Polymorphisms (SNPs) and Zygomorphic Flower Development in Pea (Pisum sativum L.)
Source: Int J Mol Sci. 2017 Dec 20;18(12):2710. doi: 10.3390/ijms18122710 (PMC5751311; doi:10.3390/ijms18122710)
Supplement: Supplementary file 1 [file ijms-18-02710-s001.zip › Table S4.xlsx]

## Sheet: unigene
UnigeneID	MtChr	Start	End
Unigene0066599	chr1	162994	163253
Unigene0065344	chr1	163248	163932
Unigene0050310	chr1	164502	165373
Unigene0076505	chr1	165714	166185
Unigene0085100	chr1	167401	174613
Unigene0085102	chr1	167401	174613
Unigene0085101	chr1	169816	174613
Unigene0058941	chr1	170538	171190
Unigene0065948	chr1	171200	171449
Unigene0060407	chr1	171439	172368
Unigene0069350	chr1	172346	172737
Unigene0023107	chr1	172797	174613
Unigene0014381	chr1	174678	176639
Unigene0076356	chr1	177624	177859
Unigene0067777	chr1	177957	178190
Unigene0075683	chr1	178794	179054
Unigene0003302	chr1	186053	186704
Unigene0056739	chr1	186955	187836
Unigene0000289	chr1	187829	188094
Unigene0062486	chr1	197876	198263
Unigene0040012	chr1	199060	199546
Unigene0077610	chr1	203220	203479
Unigene0008223	chr1	203791	204674
Unigene0070642	chr1	204841	205059
Unigene0040002	chr1	205730	207332
Unigene0054624	chr1	207386	208443
Unigene0013050	chr1	223148	225910
Unigene0041620	chr1	242801	479172
Unigene0070642	chr1	243843	244060
Unigene0040002	chr1	244701	246303
Unigene0056331	chr1	256545	257527
Unigene0001435	chr1	257768	258338
Unigene0069063	chr1	258531	258847
Unigene0001970	chr1	258838	275599
Unigene0079286	chr1	265763	265974
Unigene0073889	chr1	266018	266246
Unigene0074612	chr1	268862	269160
Unigene0020433	chr1	269220	269538
Unigene0020434	chr1	269220	269708
Unigene0054389	chr1	269721	270260
Unigene0053510	chr1	270384	271324
Unigene0066241	chr1	272706	273125
Unigene0001970	chr1	273117	273502
Unigene0069063	chr1	273493	273809
Unigene0001435	chr1	274002	274571
Unigene0056331	chr1	274812	275369
Unigene0053720	chr1	275897	276882
Unigene0087028	chr1	276950	279057
Unigene0012138	chr1	279033	279797
Unigene0076075	chr1	285046	285214
Unigene0079604	chr1	290876	291095
Unigene0010494	chr1	299463	478205
Unigene0015850	chr1	305249	398352
Unigene0075478	chr1	313612	313861
Unigene0080564	chr1	319010	319217
Unigene0073629	chr1	321877	322296
Unigene0074015	chr1	322306	322676
Unigene0080757	chr1	322980	323264
Unigene0040001	chr1	324565	326214
Unigene0000289	chr1	326224	326484
Unigene0062486	chr1	336272	336659
Unigene0040012	chr1	337457	337944
Unigene0077610	chr1	341631	341891
Unigene0008223	chr1	342203	343085
Unigene0070642	chr1	343252	343470
Unigene0040002	chr1	344141	347321
Unigene0054624	chr1	345794	347172
Unigene0039997	chr1	347299	364491
Unigene0040006	chr1	347299	474952
Unigene0040008	chr1	347299	364491
Unigene0040013	chr1	347299	417654
Unigene0040004	chr1	350688	364491
Unigene0047401	chr1	352876	353216
Unigene0012138	chr1	359463	360228
Unigene0087028	chr1	360204	362312
Unigene0053720	chr1	362380	418769
Unigene0055096	chr1	365625	366417
Unigene0056331	chr1	371830	372807
Unigene0001435	chr1	373048	373617
Unigene0069063	chr1	373810	374126
Unigene0001970	chr1	374117	374502
Unigene0066241	chr1	374494	374916
Unigene0053510	chr1	376298	377236
Unigene0054389	chr1	377360	377899
Unigene0020434	chr1	377912	378399
Unigene0020433	chr1	378081	378399
Unigene0074612	chr1	378459	378757
Unigene0073889	chr1	381368	381595
Unigene0079286	chr1	381639	381850
Unigene0041620	chr1	390845	391640
Unigene0041803	chr1	391621	392196
Unigene0017689	chr1	392231	392995
Unigene0015850	chr1	398040	398352
Unigene0053720	chr1	403920	404938
Unigene0087028	chr1	405006	446667
Unigene0012138	chr1	407089	407855
Unigene0076075	chr1	413103	413271
Unigene0039997	chr1	414390	418748
Unigene0040008	chr1	414390	418748
Unigene0047401	chr1	419790	420130
Unigene0017689	chr1	420107	421131
Unigene0041803	chr1	421166	421741
Unigene0041620	chr1	421722	422517
Unigene0079286	chr1	431512	431723
Unigene0073889	chr1	431767	431994
Unigene0077201	chr1	433871	434052
Unigene0062202	chr1	439571	440664
Unigene0056246	chr1	440972	441635
Unigene0070625	chr1	441988	442253
Unigene0039999	chr1	443616	444591
Unigene0085610	chr1	444574	446667
Unigene0048525	chr1	445549	446464
Unigene0072804	chr1	452190	452391
Unigene0040005	chr1	454564	458113
Unigene0040017	chr1	454919	458113
Unigene0056776	chr1	458121	458992
Unigene0055682	chr1	461836	462378
Unigene0006147	chr1	462916	463477
Unigene0040014	chr1	463567	465929
Unigene0000531	chr1	465917	467975
Unigene0060453	chr1	466247	466900
Unigene0077079	chr1	467042	467282
Unigene0064497	chr1	467265	467663
Unigene0042982	chr1	474931	475168
Unigene0041693	chr1	475146	476568
Unigene0042127	chr1	476573	477180
Unigene0001970	chr1	533498	533883
Unigene0069063	chr1	533874	534190
Unigene0001435	chr1	534383	534952
Unigene0056331	chr1	535195	535752
Unigene0047085	chr1	549741	549945
Unigene0063430	chr1	592483	593131
Unigene0046821	chr1	644018	655233
Unigene0079286	chr1	665048	665259
Unigene0073889	chr1	665303	665530
Unigene0074612	chr1	668141	668439
Unigene0020433	chr1	668499	668817
Unigene0020434	chr1	668499	668986
Unigene0054389	chr1	668999	669538
Unigene0053510	chr1	669662	670603
Unigene0066241	chr1	671985	672404
Unigene0001970	chr1	672396	672781
Unigene0069063	chr1	672772	673088
Unigene0001435	chr1	673281	673850
Unigene0056331	chr1	674091	675068
Unigene0055096	chr1	680484	681276
Unigene0053720	chr1	683503	684525
Unigene0087028	chr1	684593	686701
Unigene0012138	chr1	686677	687442
Unigene0076075	chr1	692690	692858
Unigene0039997	chr1	693979	697668
Unigene0040008	chr1	693979	697118
Unigene0040013	chr1	693979	697247
Unigene0010621	chr1	742272	749372
Unigene0010622	chr1	742272	749372
Unigene0015189	chr1	754574	760578
Unigene0015190	chr1	754574	760578
Unigene0033410	chr1	772931	774024
Unigene0002836	chr1	777319	781157
Unigene0002837	chr1	777319	784233
Unigene0039666	chr1	844100	850657
Unigene0013977	chr1	876942	881115
Unigene0048002	chr1	896614	904437
Unigene0045345	chr1	967045	969817
Unigene0019132	chr1	970777	999277
Unigene0019133	chr1	970777	999277
Unigene0019132	chr1	972102	974258
Unigene0019133	chr1	972102	974258
Unigene0019132	chr1	978455	981362
Unigene0019132	chr1	1008766	1011914
Unigene0019133	chr1	1008766	1011914
Unigene0010402	chr1	1014710	1016201
Unigene0057408	chr1	1020137	1021269
Unigene0033088	chr1	1031606	1038209
Unigene0033089	chr1	1031606	1040360
Unigene0033090	chr1	1031606	1040413
Unigene0033091	chr1	1031606	1038209
Unigene0033092	chr1	1031606	1038209
Unigene0033093	chr1	1031606	1038209
Unigene0033095	chr1	1031606	1040360
Unigene0033097	chr1	1031606	1038209
Unigene0033098	chr1	1031606	1040413
Unigene0033099	chr1	1031606	1038209
Unigene0082225	chr1	1031606	1040360
Unigene0083401	chr1	1031606	1040360
Unigene0084536	chr1	1031606	1040360
Unigene0085903	chr1	1031606	1040360
Unigene0033087	chr1	1035687	1040413
Unigene0033094	chr1	1035687	1038209
Unigene0033096	chr1	1035687	1040360
Unigene0044114	chr1	1042775	1045049
Unigene0019027	chr1	1051356	1057464
Unigene0003981	chr1	1134831	1138883
Unigene0009495	chr1	1146149	1146449
Unigene0083992	chr1	1165918	1172334
Unigene0086656	chr1	1165918	1172333
Unigene0023187	chr1	1176405	1180754
Unigene0023190	chr1	1176405	1180754
Unigene0047046	chr1	1303128	1306990
Unigene0045341	chr1	1307112	1308036
Unigene0042309	chr1	1374972	1379354
Unigene0019395	chr1	1385527	1401111
Unigene0048245	chr1	1394124	1394494
Unigene0048245	chr1	1401017	1401295
Unigene0027279	chr1	1406908	1408143
Unigene0027276	chr1	1408102	1411403
Unigene0044550	chr1	1431313	1435877
Unigene0085649	chr1	1440999	1449425
Unigene0054376	chr1	1456492	1459384
Unigene0086532	chr1	1546431	1548216
Unigene0086533	chr1	1546431	1553918
Unigene0048403	chr1	1597713	1600922
Unigene0046899	chr1	1665472	1674895
Unigene0046899	chr1	1735834	1745367
Unigene0043453	chr1	1758461	1758865
Unigene0044421	chr1	1758843	1759225
Unigene0043214	chr1	1759212	1759587
Unigene0047129	chr1	1765191	1767171
Unigene0044564	chr1	1825243	1835371
Unigene0036869	chr1	1892123	1994748
Unigene0036870	chr1	1897066	1994748
Unigene0071040	chr1	1899368	1899851
Unigene0046737	chr1	1914284	1953150
Unigene0047764	chr1	1922948	1923222
Unigene0036870	chr1	1981445	2015190
Unigene0071040	chr1	1983749	1984232
Unigene0048336	chr1	1986470	1989007
Unigene0036871	chr1	1994764	1995197
Unigene0036871	chr1	1996267	1996700
Unigene0036871	chr1	2015206	2015639
Unigene0013046	chr1	2020558	2024880
Unigene0085362	chr1	2032184	2042096
Unigene0011451	chr1	2063092	2063547
Unigene0014185	chr1	2067588	2074311
Unigene0004629	chr1	2354955	2358168
Unigene0019684	chr1	2425811	2434529
Unigene0019685	chr1	2425811	2434529
Unigene0081516	chr1	2425811	2434529
Unigene0081517	chr1	2425811	2434529
Unigene0044397	chr1	2434337	2436368
Unigene0013367	chr1	2459359	2462227
Unigene0030107	chr1	2483310	2492848
Unigene0030108	chr1	2483310	2492726
Unigene0030109	chr1	2483310	2492726
Unigene0042724	chr1	2635072	2635359
Unigene0041332	chr1	2635342	2637038
Unigene0042100	chr1	2675679	2679053
Unigene0012829	chr1	2726476	2728066
Unigene0012830	chr1	2726476	2728066
Unigene0033026	chr1	2729789	2732030
Unigene0033027	chr1	2729789	2731109
Unigene0033028	chr1	2729789	2732608
Unigene0084621	chr1	2729789	2732576
Unigene0012830	chr1	2743152	2744739
Unigene0020991	chr1	2876716	2886419
Unigene0020993	chr1	2876716	2886419
Unigene0020990	chr1	2876826	2886419
Unigene0020992	chr1	2876826	2886419
Unigene0045693	chr1	2904285	2906387
Unigene0009980	chr1	2945220	2948795
Unigene0043043	chr1	2963598	2968835
Unigene0058813	chr1	3312591	3312908
Unigene0057894	chr1	3312893	3313458
Unigene0053676	chr1	3314990	3317584
Unigene0071215	chr1	3317565	3317736
Unigene0004580	chr1	3330500	3335784
Unigene0004581	chr1	3330500	3335784
Unigene0042133	chr1	3458017	3464390
Unigene0034264	chr1	3477777	3478571
Unigene0037820	chr1	3478872	3479105
Unigene0044793	chr1	3609969	3619483
Unigene0025864	chr1	3646781	3650287
Unigene0004069	chr1	3671569	3675889
Unigene0017011	chr1	3696350	3700624
Unigene0017013	chr1	3696350	3700624
Unigene0048537	chr1	3725517	3729889
Unigene0055118	chr1	3774781	3777326
Unigene0077897	chr1	4061143	4061647
Unigene0050299	chr1	4066836	4067684
Unigene0005313	chr1	4126243	4135397
Unigene0005314	chr1	4126243	4135397
Unigene0077737	chr1	4127916	4128342
Unigene0007214	chr1	4184538	4188769
Unigene0005313	chr1	4213224	4223064
Unigene0005314	chr1	4213224	4223124
Unigene0077737	chr1	4220279	4220705
Unigene0058939	chr1	4245302	4245890
Unigene0003849	chr1	4266553	4273440
Unigene0073337	chr1	4276823	4277125
Unigene0003849	chr1	4281026	4285486
Unigene0073337	chr1	4287349	4287667
Unigene0021939	chr1	4351918	4374129
Unigene0048748	chr1	4354523	4357530
Unigene0018608	chr1	4421439	4426196
Unigene0018609	chr1	4421439	4427529
Unigene0004520	chr1	4477601	4481910
Unigene0080685	chr1	4493241	4493421
Unigene0049331	chr1	4561715	4563214
Unigene0025090	chr1	4602567	4604490
Unigene0025091	chr1	4602567	4605481
Unigene0025089	chr1	4605268	4605481
Unigene0043202	chr1	4614373	4614707
Unigene0044330	chr1	4617784	4622266
Unigene0003781	chr1	4669991	4677478
Unigene0014279	chr1	4702474	4707689
Unigene0006041	chr1	4710319	4720260
Unigene0076897	chr1	4715746	4715982
Unigene0017540	chr1	4771192	4776784
Unigene0017541	chr1	4771192	4776784
Unigene0022407	chr1	4779794	4785081
Unigene0022408	chr1	4779794	4783744
Unigene0022409	chr1	4779794	4785081
Unigene0022410	chr1	4779794	4783744
Unigene0066174	chr1	4798602	4798966
Unigene0071692	chr1	4798994	4799210
Unigene0085525	chr1	4815529	4820881
Unigene0048521	chr1	4857060	4859797
Unigene0048058	chr1	4860161	4861523
Unigene0085525	chr1	4892987	4898347
Unigene0027701	chr1	4929331	4930388
Unigene0020328	chr1	4934580	4941206
Unigene0012516	chr1	4945044	4945178
Unigene0048046	chr1	5154850	5157096
Unigene0003576	chr1	5194149	5200115
Unigene0003577	chr1	5194149	5200115
Unigene0024726	chr1	5268519	5270345
Unigene0003994	chr1	5302863	5315388
Unigene0052792	chr1	5346780	5347528
Unigene0054918	chr1	5348449	5348919
Unigene0024726	chr1	5361077	5362902
Unigene0020694	chr1	5378605	5384019
Unigene0083711	chr1	5378605	5380727
Unigene0020695	chr1	5381048	5381613
Unigene0003994	chr1	5428213	5440991
Unigene0003265	chr1	5530160	5531053
Unigene0045882	chr1	5561953	5565480
Unigene0045076	chr1	5671940	5679935
Unigene0060137	chr1	5727380	5728185
Unigene0018575	chr1	5738821	5749647
Unigene0018576	chr1	5738821	5749609
Unigene0035448	chr1	5774852	5778314
Unigene0048656	chr1	5775806	5776911
Unigene0001900	chr1	5860362	5861885
Unigene0038502	chr1	5864655	5869514
Unigene0040719	chr1	5968700	5970833
Unigene0074330	chr1	6018058	6018717
Unigene0060336	chr1	6041393	6041798
Unigene0059013	chr1	6041787	6043000
Unigene0003099	chr1	6049642	6057436
Unigene0076505	chr1	6063548	6063892
Unigene0044330	chr1	6094261	6098074
Unigene0049462	chr1	6161114	6162524
Unigene0049803	chr1	6162502	6163758
Unigene0023408	chr1	6180278	6188553
Unigene0009680	chr1	6238468	6238865
Unigene0082484	chr1	6350613	6353475
Unigene0082903	chr1	6350613	6353475
Unigene0084243	chr1	6350613	6353564
Unigene0086240	chr1	6350613	6353564
Unigene0037680	chr1	6382987	6386643
Unigene0002632	chr1	6398945	6403683
Unigene0013199	chr1	6460143	6461301
Unigene0051910	chr1	6576269	6579463
Unigene0018394	chr1	6597797	6603828
Unigene0018395	chr1	6597797	6603828
Unigene0018396	chr1	6597797	6603828
Unigene0018397	chr1	6597797	6603828
Unigene0012443	chr1	6653906	6657689
Unigene0012444	chr1	6653906	6657689
Unigene0014647	chr1	6658256	6671046
Unigene0014650	chr1	6658256	6671046
Unigene0044765	chr1	6679358	6681841
Unigene0043269	chr1	6987340	6989045
Unigene0047077	chr1	6991257	6997645
Unigene0048076	chr1	7024056	7027020
Unigene0032231	chr1	7067081	7070844
Unigene0045012	chr1	7067236	7067753
Unigene0074403	chr1	7087240	7087422
Unigene0045020	chr1	7089765	7091317
Unigene0009299	chr1	7140095	7140287
Unigene0003583	chr1	7196914	7202526
Unigene0006143	chr1	7210298	7214490
Unigene0026733	chr1	7264915	7273748
Unigene0024067	chr1	7278089	7288824
Unigene0007589	chr1	7342958	7344848
Unigene0060922	chr1	7363831	7371180
Unigene0060922	chr1	7363959	7364867
Unigene0060922	chr1	7375516	7377959
Unigene0008827	chr1	7739673	7743014
Unigene0024639	chr1	7891915	7895588
Unigene0024637	chr1	7895803	7897661
Unigene0010542	chr1	7897151	7898396
Unigene0003770	chr1	7973904	7978982
Unigene0047742	chr1	7979678	7984167
Unigene0083769	chr1	7987647	7988891
Unigene0003792	chr1	7989694	7991899
Unigene0003793	chr1	7989694	7991899
Unigene0003770	chr1	7994459	8002683
Unigene0006899	chr1	8019969	8027039
Unigene0013520	chr1	8031661	8034150
Unigene0042388	chr1	8083788	8087273
Unigene0051353	chr1	8091195	8092028
Unigene0005631	chr1	8112849	8115661
Unigene0000980	chr1	8198393	8199721
Unigene0035436	chr1	8235746	8241037
Unigene0047482	chr1	8266392	8269993
Unigene0001921	chr1	8283136	8285991
Unigene0016069	chr1	8304323	8311272
Unigene0046486	chr1	8395189	8398183
Unigene0046517	chr1	8398168	8399627
Unigene0008903	chr1	8487366	8490872
Unigene0043392	chr1	8489911	8490651
Unigene0014245	chr1	8533107	8537956
Unigene0014246	chr1	8533107	8537956
Unigene0014247	chr1	8533107	8537956
Unigene0014248	chr1	8533107	8537956
Unigene0014923	chr1	8546261	8550211
Unigene0059548	chr1	8547628	8547936
Unigene0014922	chr1	8547944	8550211
Unigene0049870	chr1	8550114	8551913
Unigene0042461	chr1	8803173	8810093
Unigene0038452	chr1	8827097	8827416
Unigene0046920	chr1	8831103	8831332
Unigene0008467	chr1	8831680	8832201
Unigene0008468	chr1	8831680	8832201
Unigene0007092	chr1	8872392	8878161
Unigene0009406	chr1	8880687	8882382
Unigene0044024	chr1	9067964	9071306
Unigene0009908	chr1	9108137	9125257
Unigene0047934	chr1	9127663	9129344
Unigene0026727	chr1	9291422	9295929
Unigene0026728	chr1	9291422	9296913
Unigene0026731	chr1	9291422	9296913
Unigene0030377	chr1	9335639	9353153
Unigene0033192	chr1	9393301	9396607
Unigene0026015	chr1	9648866	9649632
Unigene0072052	chr1	9685170	9685561
Unigene0003432	chr1	9707207	9712633
Unigene0005680	chr1	9712613	9713186
Unigene0041359	chr1	9808053	9813582
Unigene0045178	chr1	9821831	9826844
Unigene0015979	chr1	10098189	10126821
Unigene0086728	chr1	10098189	10126821
Unigene0004948	chr1	10165325	10178139
Unigene0004949	chr1	10165325	10178139
Unigene0038153	chr1	10252532	10253853
Unigene0038141	chr1	10252538	10253852
Unigene0078896	chr1	10281992	10283276
Unigene0008747	chr1	10302771	10308002
Unigene0055529	chr1	10303900	10304284
Unigene0013450	chr1	10310223	10314598
Unigene0013451	chr1	10310223	10314598
Unigene0019246	chr1	10314576	10321561
Unigene0019248	chr1	10314576	10321561
Unigene0019249	chr1	10314576	10321561
Unigene0019250	chr1	10314576	10321561
Unigene0019245	chr1	10316791	10321561
Unigene0019247	chr1	10316791	10321561
Unigene0044240	chr1	10359733	10371850
Unigene0059434	chr1	10414888	10415133
Unigene0044240	chr1	10467609	10479726
Unigene0031386	chr1	10482805	10485687
Unigene0031425	chr1	10486348	10486631
Unigene0031425	chr1	10510131	10510414
Unigene0031425	chr1	10588818	10588949
Unigene0042803	chr1	10604297	10611116
Unigene0045150	chr1	10614126	10617215
Unigene0045150	chr1	10620221	10625560
Unigene0011529	chr1	10834222	10838677
Unigene0011530	chr1	10834222	10838677
Unigene0011531	chr1	10834222	10838727
Unigene0011532	chr1	10834222	10838727
Unigene0043499	chr1	10846085	10850595
Unigene0005751	chr1	11075573	11081205
Unigene0005752	chr1	11075573	11081205
Unigene0077051	chr1	11093600	11093847
Unigene0036182	chr1	11124433	11129696
Unigene0036188	chr1	11124433	11129696
Unigene0036193	chr1	11126321	11129696
Unigene0038309	chr1	11181389	11181532
Unigene0042287	chr1	11390713	11395113
Unigene0045692	chr1	11418248	11423050
Unigene0046154	chr1	11423169	11424179
Unigene0044958	chr1	11425527	11434202
Unigene0044024	chr1	11434181	11439291
Unigene0021923	chr1	11805844	11812233
Unigene0021930	chr1	11805844	11812233
Unigene0021928	chr1	11808059	11812233
Unigene0021937	chr1	11808059	11812233
Unigene0016513	chr1	12072245	12074186
Unigene0043571	chr1	12074167	12076157
Unigene0027038	chr1	12082464	12089138
Unigene0020023	chr1	12262923	12266149
Unigene0020025	chr1	12262923	12266149
Unigene0020026	chr1	12263482	12266149
Unigene0020027	chr1	12263514	12266149
Unigene0020024	chr1	12263674	12266149
Unigene0013190	chr1	12446024	12446341
Unigene0011997	chr1	12468699	12471559
Unigene0038865	chr1	13103741	13113962
Unigene0004281	chr1	13151681	13152944
Unigene0037752	chr1	13194648	13195506
Unigene0031666	chr1	13224958	13229489
Unigene0030072	chr1	13289563	13306812
Unigene0017898	chr1	13333588	13336389
Unigene0035241	chr1	13340831	13343987
Unigene0084403	chr1	13340831	13343987
Unigene0035240	chr1	13341053	13343045
Unigene0035238	chr1	13343140	13346035
Unigene0035245	chr1	13343140	13343987
Unigene0035246	chr1	13343140	13346166
Unigene0035237	chr1	13343328	13343987
Unigene0035247	chr1	13343328	13346035
Unigene0035251	chr1	13343328	13346035
Unigene0035253	chr1	13343328	13343987
Unigene0051246	chr1	13387238	13387685
Unigene0070093	chr1	13392064	13392628
Unigene0044614	chr1	13398802	13400315
Unigene0044392	chr1	13543969	13547009
Unigene0032282	chr1	13636140	13649607
Unigene0004679	chr1	13687401	13704844
Unigene0010487	chr1	13714545	13719492
Unigene0035651	chr1	13773739	13783556
Unigene0035652	chr1	13773739	13783633
Unigene0035654	chr1	13773739	13783556
Unigene0035656	chr1	13773739	13783633
Unigene0035658	chr1	13773739	13783633
Unigene0035659	chr1	13773739	13786941
Unigene0035661	chr1	13773739	13783556
Unigene0035662	chr1	13773739	13783633
Unigene0035664	chr1	13773739	13783633
Unigene0035667	chr1	13773739	13783633
Unigene0035669	chr1	13773739	13783556
Unigene0035670	chr1	13773739	13783633
Unigene0035671	chr1	13773739	13783633
Unigene0035672	chr1	13773739	13783633
Unigene0035674	chr1	13773739	13786941
Unigene0035675	chr1	13773739	13786941
Unigene0035678	chr1	13773739	13783633
Unigene0035681	chr1	13773739	13783633
Unigene0035682	chr1	13773739	13783556
Unigene0035684	chr1	13773739	13783633
Unigene0035685	chr1	13773739	13783633
Unigene0035689	chr1	13773739	13786941
Unigene0035691	chr1	13773739	13786941
Unigene0035693	chr1	13773739	13786941
Unigene0035696	chr1	13773739	13783633
Unigene0035697	chr1	13773739	13783633
Unigene0035698	chr1	13773739	13783556
Unigene0035699	chr1	13773739	13783633
Unigene0035701	chr1	13773739	13786941
Unigene0035702	chr1	13773739	13783556
Unigene0035704	chr1	13773739	13783633
Unigene0035653	chr1	13774740	13783556
Unigene0035660	chr1	13774740	13783556
Unigene0035673	chr1	13774740	13783556
Unigene0035703	chr1	13774740	13783556
Unigene0035679	chr1	13775842	13783556
Unigene0035683	chr1	13775842	13777361
Unigene0035695	chr1	13775842	13783556
Unigene0014675	chr1	14164387	14178114
Unigene0014676	chr1	14164387	14178114
Unigene0086109	chr1	14185621	14191847
Unigene0087009	chr1	14220872	14224159
Unigene0009357	chr1	14256985	14264783
Unigene0009358	chr1	14256985	14264541
Unigene0009359	chr1	14256985	14264783
Unigene0043261	chr1	14265922	14270717
Unigene0065549	chr1	14279551	14279766
Unigene0060161	chr1	14279759	14280738
Unigene0047898	chr1	14320860	14328144
Unigene0026182	chr1	14337012	14349024
Unigene0026183	chr1	14337012	14349024
Unigene0026185	chr1	14337012	14349024
Unigene0026187	chr1	14337012	14349024
Unigene0026188	chr1	14337012	14349024
Unigene0026192	chr1	14337012	14349024
Unigene0026194	chr1	14337012	14349024
Unigene0026195	chr1	14337012	14349024
Unigene0026186	chr1	14343843	14349024
Unigene0026191	chr1	14343843	14349024
Unigene0026193	chr1	14343843	14349024
Unigene0026181	chr1	14345003	14349024
Unigene0026184	chr1	14345003	14349024
Unigene0011045	chr1	14358731	14364720
Unigene0011044	chr1	14363090	14364720
Unigene0043376	chr1	14365210	14371993
Unigene0087009	chr1	14385855	14389142
Unigene0061015	chr1	14460472	14461034
Unigene0045088	chr1	14527319	14529637
Unigene0035602	chr1	14803486	14820103
Unigene0035604	chr1	14803486	14820103
Unigene0035613	chr1	14803486	14820103
Unigene0035615	chr1	14803486	14820103
Unigene0046018	chr1	14831188	14841689
Unigene0060161	chr1	15262478	15263430
Unigene0086465	chr1	15271246	15272214
Unigene0045920	chr1	15335020	15340740
Unigene0020452	chr1	15342701	15346176
Unigene0020453	chr1	15342701	15346176
Unigene0020455	chr1	15342701	15346176
Unigene0020456	chr1	15342701	15346176
Unigene0066061	chr1	15682754	15683381
Unigene0021608	chr1	15732367	15738508
Unigene0044450	chr1	15735579	15737128
Unigene0040282	chr1	15766070	15772343
Unigene0040259	chr1	15767409	15772343
Unigene0019292	chr1	15777685	15778974
Unigene0019293	chr1	15777685	15778834
Unigene0019294	chr1	15777685	15779043
Unigene0052266	chr1	15779449	15780140
Unigene0054097	chr1	15780121	15780596
Unigene0043041	chr1	15805063	15809519
Unigene0074058	chr1	15829316	15829495
Unigene0083073	chr1	15832336	15842030
Unigene0083074	chr1	15832336	15842030
Unigene0083075	chr1	15832336	15842039
Unigene0083076	chr1	15832336	15843250
Unigene0083077	chr1	15832336	15842039
Unigene0027611	chr1	15833832	15842039
Unigene0027612	chr1	15833832	15842030
Unigene0027613	chr1	15833832	15842030
Unigene0027614	chr1	15833832	15843250
Unigene0083078	chr1	15833832	15842039
Unigene0010698	chr1	15879009	15883274
Unigene0075010	chr1	15928945	15929095
Unigene0051418	chr1	16004812	16006151
Unigene0038309	chr1	16014117	16014260
Unigene0013576	chr1	16018338	16024293
Unigene0083360	chr1	16018338	16024293
Unigene0038752	chr1	16031237	16031458
Unigene0049773	chr1	16055083	16056096
Unigene0086286	chr1	16282834	16285355
Unigene0026524	chr1	16293327	16296621
Unigene0026526	chr1	16293327	16296621
Unigene0080616	chr1	16302996	16303274
Unigene0059233	chr1	16305469	16306657
Unigene0057305	chr1	16307063	16309253
Unigene0064078	chr1	16309438	16310320
Unigene0009487	chr1	16350953	16364770
Unigene0009488	chr1	16350953	16364770
Unigene0040213	chr1	16354711	16354888
Unigene0035692	chr1	16364748	16380383
Unigene0035668	chr1	16380623	16380956
Unigene0024499	chr1	16395478	16398011
Unigene0024501	chr1	16395605	16398011
Unigene0044365	chr1	16487161	16490266
Unigene0004257	chr1	16736612	16740989
Unigene0048398	chr1	16774178	16775179
Unigene0042811	chr1	17066276	17067214
Unigene0004553	chr1	17098563	17101356
Unigene0048020	chr1	17318276	17318961
Unigene0047103	chr1	17328468	17332634
Unigene0008312	chr1	17354052	17356635
Unigene0008313	chr1	17354052	17356635
Unigene0082362	chr1	17357068	17358913
Unigene0019269	chr1	17358043	17358913
Unigene0064358	chr1	17447490	17447702
Unigene0030816	chr1	17518243	17523813
Unigene0030818	chr1	17523847	17537184
Unigene0050700	chr1	17570223	17573237
Unigene0051841	chr1	17573218	17573456
Unigene0051429	chr1	17573489	17574131
Unigene0032588	chr1	17595396	17610029
Unigene0032589	chr1	17595396	17610029
Unigene0032590	chr1	17595396	17610029
Unigene0032591	chr1	17595396	17610029
Unigene0032592	chr1	17595396	17610029
Unigene0032593	chr1	17595396	17610029
Unigene0032596	chr1	17595396	17610029
Unigene0032597	chr1	17595396	17601013
Unigene0032598	chr1	17595396	17610029
Unigene0032599	chr1	17595396	17610029
Unigene0032600	chr1	17595396	17610029
Unigene0032601	chr1	17595396	17610029
Unigene0032602	chr1	17595396	17610029
Unigene0032603	chr1	17595396	17610029
Unigene0032605	chr1	17595396	17610029
Unigene0032606	chr1	17595396	17610029
Unigene0032607	chr1	17595396	17610029
Unigene0032609	chr1	17595396	17610029
Unigene0032610	chr1	17595396	17610029
Unigene0032613	chr1	17595396	17610029
Unigene0032614	chr1	17595396	17610029
Unigene0032615	chr1	17595396	17610029
Unigene0032616	chr1	17595396	17610029
Unigene0032617	chr1	17595396	17601013
Unigene0032618	chr1	17595396	17601013
Unigene0032619	chr1	17595396	17610029
Unigene0032621	chr1	17595396	17610029
Unigene0032622	chr1	17595396	17610029
Unigene0032623	chr1	17595396	17610029
Unigene0032624	chr1	17595396	17601013
Unigene0032625	chr1	17595396	17610029
Unigene0032626	chr1	17595396	17610029
Unigene0032627	chr1	17595396	17610029
Unigene0032628	chr1	17595396	17610029
Unigene0084953	chr1	17595396	17610029
Unigene0084954	chr1	17595396	17610029
Unigene0032587	chr1	17602584	17610029
Unigene0032594	chr1	17602584	17610029
Unigene0032595	chr1	17602584	17610029
Unigene0032604	chr1	17602584	17610029
Unigene0032608	chr1	17602584	17610029
Unigene0032611	chr1	17602584	17610029
Unigene0032612	chr1	17602584	17610029
Unigene0032620	chr1	17602584	17610029
Unigene0068691	chr1	17606333	17606603
Unigene0004259	chr1	17614681	17620156
Unigene0004260	chr1	17614681	17620156
Unigene0084361	chr1	17635063	17638117
Unigene0084885	chr1	17635436	17638117
Unigene0028024	chr1	17644589	17646985
Unigene0002669	chr1	17648252	17649234
Unigene0038558	chr1	17673143	17680319
Unigene0012531	chr1	17712927	17721973
Unigene0008330	chr1	17728480	17730578
Unigene0003399	chr1	17757152	17759097
Unigene0003400	chr1	17757376	17759097
Unigene0081670	chr1	17998882	17999556
Unigene0042463	chr1	18050749	18053114
Unigene0030008	chr1	18055131	18060345
Unigene0086704	chr1	18055131	18060345
Unigene0018870	chr1	18075098	18077255
Unigene0050312	chr1	18097525	18101139
Unigene0043050	chr1	18111366	18111651
Unigene0043303	chr1	18157466	18159606
Unigene0004418	chr1	18207570	18208616
Unigene0004419	chr1	18207570	18208616
Unigene0007576	chr1	18209113	18216297
Unigene0005245	chr1	18216398	18223592
Unigene0005784	chr1	18242738	18246914
Unigene0003826	chr1	18249401	18252539
Unigene0003827	chr1	18249401	18252539
Unigene0017789	chr1	18258241	18263745
Unigene0017790	chr1	18258241	18269564
Unigene0017791	chr1	18258241	18269564
Unigene0017792	chr1	18258241	18269564
Unigene0017793	chr1	18258241	18269564
Unigene0017789	chr1	18287536	18293071
Unigene0017790	chr1	18287536	18298859
Unigene0017791	chr1	18287536	18298859
Unigene0017792	chr1	18287536	18298859
Unigene0017793	chr1	18287536	18298859
Unigene0021619	chr1	18339238	18357306
Unigene0021620	chr1	18339238	18357306
Unigene0021622	chr1	18339238	18357306
Unigene0021623	chr1	18339238	18357306
Unigene0021621	chr1	18343341	18357306
Unigene0082311	chr1	18350504	18357306
Unigene0007247	chr1	18359665	18365580
Unigene0035459	chr1	18403149	18410411
Unigene0035459	chr1	18431362	18438626
Unigene0004289	chr1	18456487	18461198
Unigene0005019	chr1	18463294	18465985
Unigene0005020	chr1	18463294	18465985
Unigene0011143	chr1	18467579	18474565
Unigene0011144	chr1	18467579	18474565
Unigene0007247	chr1	18507304	18513099
Unigene0021619	chr1	18515458	18533627
Unigene0021620	chr1	18515458	18533627
Unigene0021621	chr1	18515458	18529424
Unigene0021622	chr1	18515458	18533627
Unigene0021623	chr1	18515458	18533627
Unigene0082311	chr1	18515458	18522260
Unigene0055845	chr1	18565915	18566683
Unigene0072664	chr1	18571063	18571806
Unigene0012636	chr1	18649514	18651246
Unigene0012638	chr1	18649514	18651692
Unigene0011231	chr1	18654859	18656646
Unigene0011996	chr1	18843760	18845701
Unigene0081260	chr1	18894481	18894681
Unigene0084716	chr1	18986501	18988267
Unigene0044521	chr1	18993236	18998901
Unigene0042731	chr1	19074106	19078814
Unigene0014416	chr1	19140834	19141731
Unigene0045175	chr1	19163647	19164067
Unigene0018834	chr1	19268365	19276782
Unigene0044217	chr1	19317732	19328732
Unigene0016513	chr1	19354112	19357687
Unigene0061873	chr1	19354564	19354796
Unigene0046502	chr1	19357262	19359314
Unigene0079590	chr1	19358015	19358698
Unigene0045890	chr1	19362684	19364293
Unigene0012977	chr1	19365270	19368446
Unigene0012978	chr1	19365270	19368446
Unigene0046915	chr1	19365277	19365580
Unigene0046485	chr1	19366097	19366859
Unigene0046485	chr1	19415323	19416085
Unigene0021546	chr1	19430341	19431044
Unigene0061873	chr1	19449251	19449483
Unigene0040455	chr1	19833914	19837365
Unigene0040458	chr1	19837368	19844951
Unigene0076794	chr1	19847451	19848610
Unigene0073519	chr1	19849054	19849427
Unigene0079195	chr1	19850757	19850947
Unigene0043538	chr1	19852863	19861814
Unigene0073995	chr1	19857771	19858038
Unigene0005343	chr1	19915039	19915212
Unigene0005343	chr1	19940181	19940613
Unigene0004610	chr1	19941129	19941591
Unigene0061224	chr1	19947441	19947873
Unigene0043574	chr1	19964635	19973804
Unigene0018240	chr1	19981730	19985865
Unigene0084363	chr1	19988533	19992222
Unigene0046834	chr1	20002801	20005440
Unigene0041255	chr1	20017667	20022541
Unigene0016989	chr1	20043611	20051174
Unigene0038404	chr1	20084563	20086670
Unigene0038408	chr1	20085253	20086670
Unigene0038403	chr1	20086683	20093795
Unigene0042580	chr1	20120667	20125253
Unigene0042122	chr1	20159079	20162908
Unigene0086647	chr1	20197742	20201863
Unigene0015286	chr1	20258642	20285173
Unigene0044271	chr1	20301255	20312121
Unigene0051508	chr1	20312739	20313195
Unigene0053028	chr1	20313327	20313624
Unigene0081591	chr1	20329137	20332142
Unigene0048233	chr1	20332118	20333344
Unigene0046101	chr1	20339202	20341889
Unigene0033630	chr1	20353095	20353407
Unigene0058174	chr1	20353592	20353805
Unigene0012716	chr1	20356655	20362357
Unigene0051508	chr1	20394591	20395047
Unigene0053028	chr1	20395179	20395476
Unigene0014936	chr1	20414087	20417144
Unigene0086946	chr1	20414087	20417889
Unigene0036411	chr1	20417380	20418838
Unigene0036429	chr1	20417380	20418838
Unigene0036433	chr1	20417380	20418838
Unigene0036408	chr1	20421986	20430369
Unigene0036409	chr1	20421986	20430230
Unigene0036410	chr1	20421986	20430230
Unigene0036412	chr1	20421986	20430230
Unigene0036413	chr1	20421986	20430230
Unigene0036432	chr1	20421986	20430369
Unigene0082590	chr1	20421986	20430235
Unigene0082591	chr1	20421986	20430235
Unigene0082592	chr1	20421986	20430230
Unigene0082593	chr1	20421986	20430235
Unigene0082594	chr1	20421986	20430230
Unigene0082595	chr1	20421986	20430230
Unigene0082596	chr1	20421986	20430235
Unigene0082597	chr1	20421986	20430235
Unigene0082599	chr1	20421986	20430230
Unigene0082601	chr1	20421986	20430369
Unigene0082604	chr1	20421986	20429945
Unigene0082608	chr1	20421986	20430230
Unigene0082609	chr1	20421986	20430230
Unigene0082610	chr1	20421986	20430369
Unigene0082611	chr1	20421986	20430369
Unigene0082612	chr1	20421986	20430235
Unigene0082613	chr1	20421986	20430235
Unigene0082615	chr1	20421986	20430235
Unigene0082616	chr1	20421986	20430235
Unigene0082617	chr1	20421986	20429945
Unigene0082618	chr1	20421986	20430230
Unigene0082619	chr1	20421986	20430230
Unigene0082620	chr1	20421986	20430235
Unigene0082622	chr1	20421986	20430235
Unigene0082623	chr1	20421986	20430230
Unigene0082624	chr1	20421986	20430230
Unigene0082625	chr1	20421986	20430369
Unigene0082627	chr1	20421986	20430230
Unigene0082628	chr1	20421986	20430235
Unigene0082629	chr1	20421986	20430230
Unigene0082632	chr1	20421986	20430369
Unigene0082633	chr1	20421986	20430369
Unigene0082634	chr1	20421986	20430235
Unigene0082635	chr1	20421986	20430369
Unigene0082636	chr1	20421986	20430230
Unigene0082637	chr1	20421986	20430235
Unigene0082638	chr1	20421986	20429945
Unigene0082641	chr1	20421986	20430369
Unigene0082642	chr1	20421986	20430369
Unigene0082644	chr1	20421986	20429945
Unigene0082646	chr1	20421986	20430369
Unigene0082647	chr1	20421986	20430235
Unigene0082648	chr1	20421986	20430235
Unigene0082649	chr1	20421986	20430369
Unigene0036406	chr1	20421989	20422270
Unigene0046101	chr1	20435804	20441885
Unigene0048233	chr1	20450260	20451495
Unigene0043553	chr1	20668284	20670750
Unigene0009856	chr1	20689503	20693604
Unigene0009857	chr1	20689503	20693604
Unigene0009858	chr1	20691442	20693604
Unigene0009859	chr1	20691442	20693604
Unigene0047334	chr1	20702781	20704267
Unigene0042566	chr1	20714721	20720296
Unigene0082473	chr1	20740929	20743683
Unigene0007230	chr1	20821062	20827616
Unigene0013600	chr1	20828060	20828655
Unigene0013601	chr1	20828060	20828655
Unigene0061490	chr1	20870966	20871473
Unigene0043793	chr1	21058950	21061388
Unigene0047667	chr1	21101166	21109435
Unigene0026132	chr1	21160046	21164162
Unigene0026133	chr1	21160046	21164220
Unigene0026134	chr1	21160046	21164220
Unigene0026135	chr1	21160046	21164162
Unigene0026136	chr1	21160046	21164220
Unigene0026137	chr1	21160046	21164162
Unigene0026138	chr1	21160046	21164220
Unigene0026139	chr1	21160046	21164162
Unigene0026140	chr1	21160046	21164162
Unigene0026141	chr1	21160046	21164162
Unigene0026142	chr1	21160046	21164220
Unigene0026143	chr1	21160046	21164220
Unigene0026145	chr1	21160046	21164220
Unigene0026146	chr1	21160046	21164162
Unigene0026147	chr1	21160046	21164220
Unigene0026148	chr1	21160046	21164162
Unigene0043947	chr1	21189186	21190163
Unigene0005246	chr1	21261292	21265035
Unigene0004026	chr1	21312942	21313845
Unigene0038309	chr1	21329725	21329865
Unigene0084086	chr1	21338247	21340434
Unigene0025578	chr1	21339901	21340434
Unigene0007059	chr1	21340981	21344653
Unigene0084513	chr1	21344961	21345837
Unigene0043428	chr1	21364602	21370573
Unigene0044036	chr1	21398602	21407281
Unigene0067508	chr1	21406219	21406488
Unigene0016213	chr1	21445734	21457042
Unigene0016214	chr1	21445734	21457042
Unigene0016215	chr1	21445734	21457042
Unigene0016216	chr1	21445734	21457042
Unigene0048454	chr1	21500982	21502283
Unigene0047471	chr1	21504153	21504886
Unigene0019577	chr1	21505172	21515023
Unigene0019578	chr1	21506862	21515023
Unigene0011613	chr1	21516360	21523858
Unigene0019857	chr1	21555877	21563046
Unigene0019858	chr1	21555877	21563046
Unigene0019859	chr1	21555877	21557251
Unigene0019860	chr1	21555877	21563046
Unigene0010768	chr1	21564583	21568900
Unigene0010769	chr1	21564583	21568900
Unigene0041876	chr1	21593035	21597215
Unigene0044352	chr1	21625376	21629502
Unigene0027959	chr1	21631810	21634858
Unigene0027961	chr1	21631810	21636594
Unigene0027962	chr1	21631810	21636594
Unigene0027965	chr1	21631810	21636594
Unigene0027968	chr1	21631810	21634858
Unigene0027958	chr1	21632516	21636594
Unigene0027964	chr1	21632686	21636594
Unigene0027967	chr1	21634334	21636594
Unigene0044607	chr1	21654144	21657043
Unigene0060800	chr1	21678003	21678697
Unigene0081669	chr1	21715356	21726255
Unigene0081701	chr1	21715356	21726255
Unigene0085291	chr1	21715356	21726255
Unigene0086716	chr1	21715356	21726255
Unigene0032818	chr1	21761882	21766025
Unigene0032819	chr1	21761882	21766025
Unigene0032820	chr1	21766704	21771623
Unigene0043114	chr1	21775586	21779513
Unigene0046047	chr1	21783346	21786593
Unigene0007565	chr1	21789849	21791121
Unigene0019365	chr1	21790150	21793521
Unigene0004176	chr1	21806673	21809680
Unigene0057728	chr1	21807992	21808273
Unigene0045773	chr1	21808291	21808684
Unigene0006998	chr1	21811781	21817138
Unigene0042705	chr1	21821930	21824318
Unigene0081961	chr1	21831292	21838053
Unigene0009223	chr1	21835548	21838053
Unigene0050269	chr1	21841822	21847535
Unigene0044646	chr1	21865162	21866696
Unigene0026621	chr1	21884082	21894663
Unigene0035376	chr1	21927739	21930780
Unigene0006849	chr1	21968508	21979802
Unigene0026176	chr1	22002767	22003031
Unigene0000697	chr1	22168447	22170168
Unigene0000698	chr1	22168447	22170168
Unigene0012998	chr1	22184627	22187243
Unigene0042525	chr1	22189633	22192556
Unigene0066928	chr1	22218490	22218986
Unigene0066928	chr1	22230173	22230669
Unigene0044516	chr1	22243040	22246526
Unigene0085630	chr1	22252325	22255171
Unigene0041182	chr1	22260497	22264847
Unigene0013526	chr1	22340413	22340521
Unigene0010493	chr1	22370212	22370414
Unigene0013526	chr1	22370358	22370466
Unigene0046550	chr1	22400344	22402040
Unigene0000253	chr1	22421559	22421899
Unigene0000254	chr1	22421718	22421899
Unigene0073912	chr1	22422574	22422766
Unigene0012367	chr1	22429068	22433143
Unigene0008305	chr1	22440065	22443566
Unigene0008306	chr1	22440065	22443566
Unigene0013756	chr1	22459856	22467279
Unigene0013757	chr1	22459856	22467018
Unigene0042769	chr1	22472997	22477606
Unigene0004834	chr1	22480382	22485600
Unigene0004835	chr1	22480382	22485600
Unigene0083291	chr1	22531316	22539796
Unigene0032212	chr1	22533369	22539796
Unigene0032211	chr1	22533529	22539796
Unigene0045151	chr1	22537947	22539125
Unigene0018502	chr1	22825768	22829713
Unigene0018504	chr1	22825768	22829713
Unigene0018505	chr1	22825768	22829713
Unigene0043367	chr1	22831206	22833427
Unigene0007093	chr1	22838580	22838956
Unigene0007094	chr1	22838580	22838956
Unigene0012026	chr1	22845183	22857490
Unigene0012027	chr1	22845183	22857490
Unigene0083447	chr1	22874653	22877350
Unigene0001620	chr1	22877369	22880410
Unigene0083447	chr1	22891794	22893346
Unigene0043930	chr1	22925473	22928063
Unigene0042737	chr1	22943666	22947385
Unigene0055432	chr1	22956062	22956263
Unigene0077817	chr1	22959722	22960101
Unigene0043369	chr1	22961234	22962246
Unigene0043102	chr1	22962586	22963220
Unigene0042645	chr1	22963633	22964303
Unigene0047283	chr1	22992790	22994235
Unigene0002307	chr1	22994312	22995801
Unigene0046260	chr1	23001743	23004541
Unigene0003144	chr1	23002780	23003837
Unigene0045563	chr1	23004525	23005814
Unigene0044936	chr1	23005800	23006785
Unigene0004277	chr1	23045226	23046010
Unigene0038370	chr1	23046614	23047612
Unigene0041510	chr1	23046655	23047210
Unigene0017322	chr1	23129336	23134211
Unigene0083008	chr1	23129336	23134211
Unigene0078127	chr1	23144946	23145125
Unigene0018199	chr1	23242391	23247174
Unigene0018200	chr1	23242391	23247174
Unigene0085909	chr1	23242391	23247174
Unigene0085992	chr1	23242391	23247174
Unigene0041585	chr1	23269001	23273678
Unigene0020551	chr1	23285062	23294513
Unigene0020549	chr1	23293035	23294513
Unigene0010196	chr1	23322248	23330097
Unigene0044368	chr1	23343898	23352152
Unigene0015158	chr1	23358546	23375259
Unigene0015159	chr1	23358546	23375259
Unigene0020509	chr1	23481397	23485664
Unigene0064373	chr1	23493308	23493661
Unigene0045541	chr1	23512126	23514713
Unigene0079588	chr1	23516231	23516382
Unigene0004950	chr1	23535531	23544444
Unigene0004951	chr1	23535531	23544444
Unigene0078962	chr1	23538742	23539349
Unigene0034638	chr1	23566395	23570321
Unigene0079588	chr1	23609720	23609871
Unigene0045541	chr1	23611389	23613976
Unigene0020259	chr1	23659397	23663827
Unigene0020260	chr1	23659397	23663827
Unigene0020261	chr1	23659397	23663827
Unigene0082067	chr1	23665428	23669289
Unigene0083634	chr1	23665428	23669289
Unigene0084918	chr1	23665428	23669289
Unigene0087119	chr1	23665428	23669289
Unigene0039304	chr1	23668587	23669289
Unigene0039314	chr1	23668838	23669289
Unigene0007140	chr1	23684829	23689893
Unigene0013091	chr1	23737828	23740437
Unigene0034095	chr1	23743249	23749871
Unigene0016790	chr1	23751957	23753036
Unigene0016791	chr1	23751957	23754005
Unigene0016791	chr1	23820543	23822591
Unigene0021874	chr1	23861561	23866431
Unigene0051547	chr1	23863007	23863405
Unigene0012541	chr1	23863643	23864222
Unigene0050103	chr1	23865659	23866516
Unigene0041434	chr1	23882047	23884453
Unigene0048032	chr1	23966423	23974095
Unigene0006138	chr1	23987030	23994523
Unigene0048833	chr1	24000851	24006296
Unigene0004633	chr1	24069190	24077743
Unigene0034234	chr1	24092464	24093850
Unigene0046152	chr1	24111520	24115843
Unigene0045577	chr1	24120578	24127844
Unigene0042540	chr1	24137009	24138459
Unigene0083283	chr1	24143604	24149640
Unigene0086788	chr1	24148817	24149640
Unigene0028131	chr1	24149771	24150112
Unigene0036079	chr1	24152919	24156938
Unigene0036074	chr1	24157099	24157489
Unigene0036075	chr1	24157099	24157726
Unigene0044805	chr1	24173385	24175021
Unigene0036074	chr1	24176227	24176800
Unigene0036075	chr1	24176227	24176964
Unigene0036080	chr1	24176227	24182329
Unigene0001435	chr1	24196105	24196674
Unigene0069063	chr1	24196867	24197183
Unigene0001970	chr1	24197174	24197559
Unigene0066241	chr1	24197551	24197970
Unigene0053510	chr1	24199350	24200288
Unigene0054389	chr1	24200412	24200951
Unigene0020434	chr1	24200964	24201450
Unigene0020433	chr1	24201133	24201450
Unigene0074612	chr1	24201510	24201808
Unigene0079286	chr1	24210393	24210604
Unigene0073889	chr1	24210648	24210791
Unigene0006552	chr1	24449201	24513854
Unigene0022272	chr1	24464104	24468449
Unigene0022273	chr1	24464104	24468449
Unigene0006552	chr1	24503422	24539264
Unigene0011555	chr1	24543526	24545050
Unigene0083889	chr1	24625828	24647671
Unigene0002107	chr1	24655710	24659643
Unigene0002108	chr1	24655710	24659643
Unigene0010105	chr1	24675860	24677135
Unigene0082582	chr1	24675860	24680834
Unigene0041563	chr1	24752634	24755276
Unigene0006902	chr1	24801277	24813946
Unigene0025924	chr1	24820049	24825936
Unigene0042802	chr1	24820792	24821295
Unigene0025924	chr1	24831924	24836233
Unigene0042802	chr1	24832649	24833153
Unigene0080753	chr1	24839411	24839622
Unigene0031673	chr1	24851795	24852124
Unigene0010441	chr1	24901421	24908948
Unigene0010442	chr1	24901421	24908948
Unigene0010443	chr1	24901421	24908948
Unigene0010444	chr1	24901421	24908948
Unigene0046634	chr1	24910432	24915922
Unigene0070531	chr1	24919717	24920033
Unigene0061684	chr1	24920172	24920444
Unigene0064416	chr1	24921967	24922577
Unigene0078129	chr1	24922582	24922810
Unigene0068780	chr1	24922822	24923108
Unigene0083727	chr1	24923770	24926611
Unigene0009291	chr1	24926459	24926611
Unigene0012510	chr1	24927139	24929116
Unigene0012511	chr1	24927139	24929116
Unigene0043094	chr1	24983083	24986947
Unigene0064641	chr1	24997942	24998217
Unigene0011606	chr1	25005453	25006481
Unigene0011550	chr1	25020146	25028430
Unigene0048973	chr1	25041227	25044374
Unigene0075374	chr1	25044146	25044486
Unigene0002844	chr1	25707847	25708635
Unigene0002845	chr1	25707847	25708635
Unigene0020029	chr1	25716377	25719697
Unigene0020030	chr1	25716377	25719697
Unigene0020031	chr1	25717159	25719697
Unigene0019658	chr1	25966709	25968945
Unigene0019659	chr1	25966709	25968945
Unigene0004296	chr1	25989249	25994804
Unigene0004297	chr1	25989249	25994804
Unigene0003685	chr1	26001432	26007486
Unigene0042584	chr1	26057599	26058757
Unigene0004400	chr1	26058735	26060725
Unigene0047968	chr1	26193232	26195148
Unigene0048093	chr1	26195272	26196247
Unigene0047442	chr1	26226071	26231247
Unigene0005096	chr1	26248036	26248660
Unigene0004400	chr1	26291514	26293315
Unigene0042584	chr1	26293482	26294640
Unigene0003685	chr1	26344753	26350488
Unigene0009648	chr1	26456305	26463202
Unigene0046324	chr1	26475930	26478191
Unigene0019826	chr1	26491907	26494549
Unigene0003950	chr1	26529830	26536778
Unigene0006721	chr1	26817751	26821264
Unigene0006722	chr1	26818085	26821264
Unigene0045268	chr1	26821248	26822459
Unigene0047151	chr1	26824652	26824928
Unigene0013999	chr1	26824902	26831351
Unigene0014000	chr1	26824902	26831351
Unigene0014001	chr1	26824902	26831351
Unigene0014002	chr1	26824902	26831351
Unigene0026544	chr1	26837698	26843098
Unigene0086074	chr1	26837698	26843098
Unigene0034589	chr1	26848975	26856681
Unigene0034594	chr1	26848975	26856681
Unigene0034595	chr1	26848975	26856681
Unigene0034597	chr1	26848975	26856681
Unigene0043482	chr1	26865039	26869251
Unigene0073940	chr1	26897194	26897387
Unigene0001771	chr1	26931123	26935993
Unigene0001772	chr1	26934062	26935993
Unigene0040091	chr1	26952850	26954670
Unigene0040093	chr1	26952850	26953406
Unigene0040092	chr1	26952862	26954670
Unigene0048000	chr1	26956141	26959194
Unigene0068625	chr1	26960736	26961486
Unigene0077326	chr1	26961670	26961887
Unigene0079723	chr1	26961892	26962105
Unigene0041316	chr1	26969284	26974011
Unigene0052294	chr1	27010553	27010820
Unigene0056164	chr1	27012688	27013045
Unigene0056074	chr1	27029089	27029612
Unigene0055441	chr1	27029590	27030101
Unigene0051913	chr1	27030082	27031184
Unigene0004706	chr1	27046243	27056875
Unigene0004707	chr1	27046243	27056875
Unigene0060452	chr1	27046750	27047357
Unigene0009749	chr1	27063269	27065501
Unigene0009751	chr1	27063269	27066104
Unigene0009748	chr1	27064944	27065501
Unigene0009750	chr1	27064944	27066104
Unigene0006064	chr1	27070220	27078914
Unigene0006065	chr1	27070220	27078914
Unigene0000224	chr1	27184457	27184666
Unigene0026475	chr1	27212805	27295182
Unigene0026476	chr1	27212805	27295182
Unigene0026477	chr1	27212805	27295182
Unigene0026478	chr1	27212805	27295182
Unigene0084094	chr1	27212805	27295182
Unigene0085444	chr1	27212805	27295182
Unigene0086043	chr1	27212805	27295182
Unigene0086324	chr1	27212805	27295182
Unigene0086446	chr1	27334412	27344681
Unigene0086447	chr1	27334412	27344681
Unigene0086448	chr1	27334412	27344681
Unigene0086449	chr1	27334412	27344681
Unigene0043768	chr1	27346732	27349844
Unigene0006010	chr1	27365007	27366847
Unigene0006011	chr1	27365007	27366847
Unigene0033100	chr1	27377706	27378211
Unigene0033101	chr1	27378428	27379329
Unigene0033106	chr1	27378428	27378934
Unigene0007375	chr1	27378450	27378669
Unigene0014258	chr1	27401175	27406782
Unigene0035257	chr1	27430038	27438159
Unigene0035264	chr1	27430038	27438159
Unigene0037820	chr1	27441163	27441427
Unigene0034264	chr1	27441728	27442964
Unigene0041526	chr1	27446997	27449840
Unigene0003191	chr1	27501389	27508440
Unigene0044665	chr1	27519317	27521384
Unigene0050866	chr1	27535098	27536883
Unigene0042418	chr1	27614708	27617029
Unigene0042418	chr1	27699516	27701884
Unigene0042418	chr1	27708210	27712331
Unigene0060678	chr1	27981105	27984331
Unigene0072076	chr1	27984037	27984557
Unigene0077436	chr1	27984683	27985300
Unigene0005312	chr1	28004327	28009569
Unigene0060678	chr1	28069683	28072909
Unigene0072076	chr1	28072615	28073135
Unigene0077436	chr1	28073261	28073878
Unigene0005312	chr1	28092898	28098141
Unigene0031115	chr1	28114002	28117212
Unigene0031114	chr1	28115204	28117212
Unigene0022347	chr1	28118773	28119270
Unigene0022347	chr1	28145710	28146401
Unigene0022348	chr1	28145904	28146401
Unigene0042125	chr1	28147361	28147634
Unigene0043336	chr1	28150709	28153928
Unigene0006704	chr1	28164502	28170283
Unigene0006705	chr1	28164502	28170283
Unigene0034386	chr1	28175112	28177508
Unigene0059005	chr1	28188457	28189972
Unigene0046888	chr1	28191492	28192099
Unigene0045335	chr1	28233580	28237869
Unigene0075147	chr1	28270561	28270774
Unigene0086777	chr1	28270755	28271306
Unigene0070202	chr1	28272461	28272793
Unigene0042875	chr1	28297779	28302650
Unigene0062135	chr1	28300749	28300974
Unigene0052478	chr1	28302032	28302372
Unigene0036434	chr1	28305933	28309022
Unigene0042923	chr1	28331524	28333204
Unigene0004073	chr1	28355876	28363721
Unigene0004074	chr1	28355876	28363721
Unigene0075691	chr1	28360865	28361291
Unigene0041172	chr1	28366662	28368488
Unigene0063821	chr1	28392255	28393066
Unigene0024649	chr1	28527378	28534698
Unigene0006107	chr1	28563585	28571587
Unigene0081919	chr1	28632914	28646122
Unigene0082584	chr1	28632914	28646122
Unigene0082860	chr1	28632914	28646122
Unigene0082912	chr1	28632914	28646122
Unigene0084934	chr1	28632914	28646122
Unigene0085550	chr1	28632914	28646122
Unigene0086351	chr1	28632914	28646122
Unigene0087118	chr1	28632914	28646122
Unigene0028742	chr1	28636829	28646122
Unigene0028744	chr1	28636829	28646122
Unigene0028746	chr1	28636829	28641635
Unigene0028747	chr1	28636829	28641635
Unigene0083728	chr1	28636966	28646122
Unigene0086321	chr1	28636966	28646122
Unigene0023816	chr1	28707215	28718461
Unigene0023817	chr1	28707215	28718461
Unigene0026823	chr1	28753438	28756313
Unigene0022393	chr1	28754029	28754303
Unigene0036786	chr1	28754282	28754721
Unigene0008838	chr1	28757141	28757292
Unigene0012659	chr1	28757450	28757988
Unigene0012659	chr1	28774705	28775467
Unigene0035807	chr1	28790579	28791967
Unigene0035805	chr1	28791327	28791967
Unigene0044623	chr1	28791945	28794433
Unigene0084212	chr1	28804901	28808986
Unigene0028027	chr1	28811226	28816212
Unigene0028028	chr1	28811226	28816212
Unigene0028029	chr1	28811226	28815786
Unigene0028030	chr1	28811226	28817857
Unigene0028031	chr1	28811226	28817857
Unigene0028032	chr1	28811226	28815786
Unigene0086566	chr1	28811226	28817857
Unigene0086572	chr1	28811226	28817857
Unigene0085234	chr1	28818271	28820719
Unigene0058683	chr1	28820702	28822079
Unigene0014410	chr1	28837463	28841423
Unigene0084476	chr1	28837463	28841423
Unigene0023590	chr1	28867830	28876719
Unigene0023590	chr1	28867979	28868281
Unigene0051724	chr1	28885128	28886381
Unigene0045464	chr1	28913931	28916125
Unigene0049524	chr1	28920193	28921781
Unigene0002586	chr1	28922332	28923391
Unigene0050567	chr1	28923369	28923951
Unigene0051021	chr1	28923933	28924723
Unigene0074889	chr1	28931279	28931898
Unigene0051766	chr1	28939957	28940645
Unigene0051724	chr1	28967966	28969219
Unigene0039293	chr1	28994690	28994952
Unigene0039296	chr1	28995158	28995445
Unigene0039296	chr1	29000443	29000872
Unigene0002264	chr1	29026407	29026781
Unigene0002264	chr1	29034024	29034424
Unigene0002264	chr1	29037129	29037530
Unigene0049524	chr1	29045815	29047403
Unigene0002586	chr1	29047954	29049013
Unigene0050567	chr1	29048991	29049573
Unigene0051021	chr1	29049555	29050345
Unigene0074889	chr1	29056901	29057520
Unigene0045464	chr1	29061311	29063505
Unigene0051766	chr1	29083330	29084103
Unigene0002264	chr1	29094291	29094691
Unigene0002264	chr1	29097396	29097815
Unigene0002264	chr1	29101721	29102100
Unigene0056199	chr1	29116630	29117801
Unigene0054190	chr1	29117815	29118550
Unigene0048272	chr1	29122943	29125555
Unigene0048665	chr1	29125533	29125755
Unigene0069734	chr1	29127650	29130827
Unigene0069734	chr1	29144275	29148036
Unigene0047143	chr1	29162843	29166713
Unigene0046050	chr1	29176893	29183377
Unigene0032663	chr1	29194632	29195854
Unigene0032665	chr1	29194632	29195854
Unigene0032666	chr1	29194632	29195885
Unigene0032667	chr1	29194632	29196866
Unigene0037857	chr1	29201369	29207461
Unigene0037859	chr1	29201369	29208518
Unigene0037859	chr1	29248596	29255658
Unigene0037857	chr1	29249566	29255658
Unigene0032667	chr1	29260161	29262395
Unigene0032666	chr1	29261142	29262395
Unigene0032663	chr1	29261173	29262395
Unigene0032665	chr1	29261173	29262395
Unigene0046050	chr1	29273650	29280134
Unigene0047143	chr1	29290314	29292876
Unigene0016009	chr1	29303006	29310918
Unigene0016011	chr1	29303006	29310693
Unigene0016012	chr1	29303006	29310693
Unigene0032714	chr1	29318752	29319447
Unigene0013744	chr1	29342461	29345817
Unigene0013745	chr1	29342461	29345817
Unigene0013746	chr1	29342461	29345401
Unigene0013747	chr1	29342461	29345401
Unigene0013748	chr1	29342461	29345817
Unigene0015542	chr1	29349585	29351412
Unigene0015543	chr1	29349585	29351262
Unigene0015544	chr1	29349585	29351412
Unigene0044173	chr1	29393506	29397678
Unigene0045149	chr1	29397658	29398548
Unigene0016009	chr1	29454418	29463734
Unigene0016011	chr1	29454418	29463734
Unigene0016012	chr1	29454418	29463734
Unigene0007829	chr1	29551026	29552819
Unigene0007830	chr1	29551026	29552692
Unigene0047354	chr1	29590640	29592341
Unigene0047581	chr1	29593236	29595068
Unigene0081913	chr1	29595769	29601687
Unigene0081969	chr1	29595769	29601687
Unigene0084213	chr1	29595769	29601687
Unigene0084272	chr1	29595769	29601584
Unigene0084825	chr1	29595769	29601584
Unigene0085537	chr1	29595769	29601584
Unigene0087019	chr1	29595769	29601584
Unigene0087023	chr1	29595769	29601687
Unigene0015629	chr1	29601575	29605856
Unigene0015631	chr1	29601575	29605856
Unigene0009485	chr1	29647851	29648357
Unigene0041841	chr1	29648361	29650477
Unigene0082575	chr1	29976748	29979113
Unigene0084946	chr1	29976748	29979113
Unigene0081615	chr1	30033637	30037096
Unigene0013071	chr1	30131391	30133529
Unigene0015990	chr1	30146059	30148213
Unigene0086734	chr1	30146059	30148288
Unigene0044575	chr1	30198899	30202342
Unigene0045213	chr1	30203515	30206007
Unigene0010106	chr1	30211148	30214002
Unigene0050502	chr1	30224020	30224781
Unigene0004086	chr1	30232071	30238454
Unigene0014572	chr1	30241385	30246861
Unigene0045190	chr1	30328518	30329186
Unigene0048121	chr1	30472142	30473982
Unigene0082528	chr1	30681610	30693575
Unigene0015805	chr1	30780434	30785013
Unigene0020402	chr1	30796486	30802631
Unigene0020403	chr1	30797397	30802631
Unigene0043576	chr1	30847146	30860462
Unigene0058836	chr1	30847967	30848244
Unigene0062440	chr1	30868900	30869037
Unigene0043171	chr1	30885388	30887318
Unigene0018616	chr1	30905576	30906497
Unigene0018618	chr1	30905576	30906064
Unigene0004237	chr1	30909784	30913052
Unigene0004238	chr1	30909784	30913052
Unigene0051052	chr1	30916561	30917321
Unigene0049075	chr1	30961154	30962127
Unigene0071105	chr1	30970684	30970892
Unigene0003607	chr1	30971423	30971727
Unigene0003606	chr1	30971705	30973276
Unigene0052045	chr1	30973317	30973694
Unigene0002784	chr1	30974558	30978453
Unigene0007851	chr1	31001134	31007248
Unigene0007852	chr1	31001134	31007248
Unigene0027725	chr1	31038144	31045570
Unigene0027729	chr1	31038144	31045570
Unigene0027730	chr1	31038144	31045570
Unigene0027731	chr1	31038144	31045570
Unigene0081645	chr1	31038144	31045570
Unigene0081656	chr1	31038144	31045570
Unigene0081668	chr1	31038144	31045570
Unigene0081672	chr1	31038144	31045570
Unigene0048214	chr1	31082539	31085088
Unigene0071895	chr1	31083706	31084220
Unigene0047724	chr1	31085065	31095143
Unigene0017769	chr1	31109070	31109756
Unigene0033913	chr1	31120824	31122210
Unigene0033917	chr1	31122028	31122410
Unigene0033920	chr1	31122436	31125566
Unigene0043734	chr1	31317704	31323122
Unigene0070676	chr1	31328162	31328316
Unigene0070676	chr1	31410273	31410427
Unigene0046305	chr1	31491327	31494960
Unigene0017895	chr1	31512694	31518910
Unigene0017896	chr1	31512694	31519329
Unigene0040009	chr1	31542640	31543853
Unigene0058795	chr1	31543842	31544359
Unigene0063355	chr1	31545095	31545282
Unigene0076419	chr1	31593188	31593420
Unigene0070676	chr1	31629580	31629734
Unigene0043734	chr1	31634774	31640192
Unigene0036750	chr1	31813314	31813973
Unigene0036753	chr1	31813314	31813985
Unigene0086720	chr1	31813314	31817285
Unigene0008910	chr1	31820826	31823972
Unigene0004094	chr1	31838688	31844805
Unigene0004095	chr1	31838688	31844805
Unigene0046041	chr1	31845676	31848244
Unigene0010599	chr1	31950426	31954061
Unigene0010600	chr1	31950426	31954061
Unigene0024029	chr1	31962628	31968042
Unigene0024024	chr1	31964270	31968042
Unigene0046666	chr1	31985052	31991754
Unigene0073304	chr1	31987905	31988127
Unigene0043683	chr1	31997787	32011098
Unigene0037506	chr1	32001952	32002288
Unigene0034577	chr1	32004071	32004361
Unigene0040812	chr1	32036060	32041041
Unigene0028919	chr1	32074439	32075703
Unigene0037216	chr1	32099350	32099556
Unigene0058839	chr1	32099571	32099726
Unigene0086118	chr1	32099974	32100286
Unigene0000914	chr1	32364367	32364729
Unigene0014254	chr1	32365458	32365735
Unigene0046150	chr1	32367624	32372342
Unigene0037218	chr1	32389812	32402533
Unigene0077427	chr1	32409549	32409814
Unigene0058839	chr1	32417350	32417538
Unigene0037216	chr1	32422044	32422241
Unigene0058839	chr1	32422248	32422444
Unigene0013117	chr1	32438516	32442662
Unigene0013116	chr1	32439333	32442662
Unigene0013118	chr1	32439333	32442662
Unigene0058839	chr1	32444963	32445143
Unigene0058839	chr1	32448596	32448748
Unigene0070291	chr1	32462407	32462775
Unigene0057973	chr1	32462754	32463478
Unigene0081250	chr1	32469799	32469992
Unigene0027640	chr1	32477049	32486273
Unigene0027642	chr1	32477049	32486273
Unigene0027643	chr1	32477049	32486273
Unigene0027646	chr1	32477049	32486273
Unigene0027649	chr1	32477049	32486273
Unigene0027650	chr1	32477049	32486273
Unigene0027653	chr1	32477049	32486273
Unigene0027656	chr1	32477049	32486273
Unigene0027659	chr1	32477049	32486273
Unigene0043712	chr1	32488145	32493517
Unigene0004191	chr1	32558865	32570954
Unigene0067457	chr1	32582306	32583569
Unigene0083980	chr1	32592766	32598510
Unigene0022325	chr1	32592795	32598510
Unigene0022326	chr1	32592795	32598510
Unigene0083321	chr1	32592795	32598510
Unigene0022327	chr1	32592986	32598510
Unigene0084015	chr1	32592986	32598510
Unigene0003263	chr1	32617711	32621491
Unigene0007438	chr1	32671672	32676002
Unigene0035246	chr1	32828971	32832368
Unigene0035248	chr1	32828971	32832142
Unigene0035238	chr1	32829102	32832368
Unigene0035247	chr1	32829102	32832142
Unigene0035251	chr1	32829102	32832142
Unigene0035237	chr1	32831479	32832142
Unigene0035241	chr1	32831479	32835698
Unigene0035245	chr1	32831479	32832368
Unigene0035253	chr1	32831479	32832142
Unigene0084403	chr1	32831479	32835698
Unigene0035240	chr1	32832463	32835473
Unigene0014517	chr1	32879717	32882820
Unigene0014519	chr1	32880426	32882820
Unigene0023647	chr1	32883512	32884828
Unigene0023646	chr1	32884694	32886081
Unigene0012946	chr1	32886058	32892400
Unigene0085375	chr1	32942821	32951087
Unigene0012643	chr1	32967016	32969922
Unigene0012644	chr1	32967135	32969922
Unigene0050385	chr1	32991357	33016662
Unigene0003770	chr1	33048411	33053129
Unigene0019525	chr1	33072171	33074802
Unigene0019526	chr1	33072171	33077249
Unigene0005449	chr1	33086793	33091284
Unigene0005450	chr1	33086793	33091284
Unigene0041509	chr1	33096692	33104986
Unigene0023313	chr1	33107034	33111523
Unigene0023314	chr1	33107034	33111523
Unigene0083389	chr1	33107034	33111523
Unigene0085273	chr1	33107034	33111523
Unigene0046134	chr1	33117314	33122282
Unigene0016097	chr1	33125463	33125681
Unigene0044227	chr1	33148282	33150497
Unigene0018839	chr1	33201467	33207345
Unigene0018840	chr1	33201467	33207443
Unigene0018841	chr1	33201467	33207347
Unigene0018842	chr1	33201467	33207345
Unigene0018843	chr1	33201467	33207347
Unigene0043252	chr1	33216515	33223558
Unigene0044378	chr1	33228486	33234567
Unigene0038141	chr1	33242252	33243840
Unigene0038153	chr1	33242252	33243839
Unigene0038142	chr1	33244000	33247589
Unigene0038151	chr1	33248901	33251573
Unigene0085304	chr1	33248901	33251573
Unigene0046444	chr1	33255112	33257808
Unigene0056986	chr1	33326284	33326544
Unigene0037727	chr1	33523770	33524432
Unigene0003392	chr1	33587154	33592823
Unigene0003393	chr1	33587154	33592823
Unigene0037727	chr1	33611099	33611761
Unigene0033759	chr1	33625655	33629108
Unigene0043522	chr1	33658559	33663729
Unigene0043423	chr1	33665751	33669769
Unigene0018319	chr1	33682309	33685423
Unigene0018321	chr1	33682309	33685423
Unigene0004921	chr1	33696221	33700102
Unigene0059057	chr1	33696974	33697362
Unigene0041999	chr1	33702063	33706040
Unigene0039944	chr1	33710979	33715307
Unigene0017267	chr1	33745270	33750643
Unigene0042292	chr1	33758976	33762146
Unigene0014387	chr1	33766791	33767836
Unigene0014388	chr1	33767256	33767836
Unigene0046001	chr1	33768741	33769977
Unigene0004447	chr1	33781759	33789558
Unigene0016112	chr1	33791026	33794022
Unigene0016113	chr1	33791026	33794022
Unigene0032759	chr1	33810428	33816991
Unigene0033297	chr1	33817152	33825773
Unigene0046872	chr1	33825892	33826186
Unigene0047026	chr1	33826163	33826762
Unigene0046801	chr1	33826766	33827257
Unigene0045539	chr1	33831718	33832577
Unigene0045118	chr1	33832561	33832817
Unigene0044599	chr1	33832861	33833745
Unigene0044593	chr1	33833729	33834489
Unigene0048006	chr1	33836431	33837498
Unigene0001561	chr1	33870278	33870517
Unigene0019411	chr1	33885987	33900979
Unigene0042882	chr1	33907220	33914922
Unigene0042209	chr1	33922559	33927573
Unigene0015887	chr1	33929748	33934172
Unigene0015888	chr1	33930835	33934172
Unigene0015889	chr1	33930835	33934172
Unigene0087073	chr1	33935946	33938516
Unigene0003794	chr1	33948226	33953475
Unigene0003795	chr1	33948226	33953475
Unigene0031129	chr1	34032891	34035898
Unigene0013328	chr1	34043163	34046000
Unigene0013329	chr1	34043163	34046000
Unigene0013330	chr1	34043163	34046000
Unigene0013331	chr1	34043163	34046000
Unigene0051028	chr1	34075820	34076432
Unigene0043882	chr1	34078174	34086906
Unigene0042895	chr1	34111804	34113258
Unigene0030746	chr1	34112592	34113244
Unigene0036819	chr1	34122656	34139178
Unigene0045380	chr1	34126047	34136175
Unigene0017239	chr2	22467	24529
Unigene0085418	chr2	41402	51382
Unigene0004997	chr2	94266	103823
Unigene0004206	chr2	107745	109372
Unigene0085514	chr2	124010	126352
Unigene0010070	chr2	131472	134985
Unigene0050659	chr2	153224	153984
Unigene0082440	chr2	220492	223400
Unigene0015759	chr2	225436	230544
Unigene0015760	chr2	225436	230544
Unigene0015761	chr2	225436	230544
Unigene0015762	chr2	225436	230544
Unigene0055292	chr2	227062	227535
Unigene0020327	chr2	232949	237331
Unigene0045148	chr2	233599	233919
Unigene0004153	chr2	241465	247599
Unigene0045909	chr2	286163	291814
Unigene0070703	chr2	286747	287123
Unigene0014375	chr2	292469	293850
Unigene0014376	chr2	292469	293850
Unigene0010832	chr2	333325	337660
Unigene0010833	chr2	333325	335397
Unigene0010834	chr2	333325	337660
Unigene0021150	chr2	338839	341004
Unigene0082483	chr2	364351	369780
Unigene0084828	chr2	364351	369780
Unigene0041319	chr2	392467	395363
Unigene0008888	chr2	419965	426208
Unigene0016840	chr2	423907	424268
Unigene0012152	chr2	437277	443754
Unigene0012153	chr2	437277	443754
Unigene0012154	chr2	437277	443754
Unigene0012155	chr2	437277	443754
Unigene0012156	chr2	437277	443754
Unigene0012157	chr2	437277	443754
Unigene0011074	chr2	446906	453937
Unigene0011075	chr2	446906	453937
Unigene0011076	chr2	446906	453937
Unigene0011077	chr2	446906	453937
Unigene0045566	chr2	470860	475008
Unigene0043439	chr2	482630	486547
Unigene0025882	chr2	523873	530535
Unigene0059555	chr2	524440	524640
Unigene0022818	chr2	539843	542833
Unigene0022819	chr2	539843	542833
Unigene0009704	chr2	543987	548366
Unigene0009705	chr2	543987	548236
Unigene0081630	chr2	577171	584051
Unigene0085999	chr2	577171	584051
Unigene0043640	chr2	586364	627782
Unigene0043640	chr2	586401	591020
Unigene0045566	chr2	654059	658314
Unigene0043439	chr2	665836	669752
Unigene0038321	chr2	701094	709632
Unigene0038322	chr2	701094	709632
Unigene0043375	chr2	721279	726392
Unigene0033762	chr2	728374	728814
Unigene0033762	chr2	751126	751913
Unigene0041425	chr2	756308	759815
Unigene0072412	chr2	776874	777163
Unigene0074337	chr2	777151	777876
Unigene0005746	chr2	791990	798628
Unigene0038321	chr2	810630	819168
Unigene0038322	chr2	810630	819168
Unigene0009113	chr2	860353	877815
Unigene0009114	chr2	860353	877815
Unigene0009115	chr2	860353	877815
Unigene0079698	chr2	873017	873614
Unigene0022838	chr2	889482	894316
Unigene0022841	chr2	889482	894316
Unigene0013127	chr2	899081	902585
Unigene0013128	chr2	899081	902585
Unigene0081886	chr2	904014	910787
Unigene0083449	chr2	904014	910787
Unigene0031299	chr2	955360	961247
Unigene0031302	chr2	955360	961247
Unigene0034021	chr2	988404	1024957
Unigene0034022	chr2	988404	1024957
Unigene0072795	chr2	1066809	1067063
Unigene0079196	chr2	1067165	1067394
Unigene0017798	chr2	1160412	1163675
Unigene0022324	chr2	1166696	1171559
Unigene0022321	chr2	1169499	1171559
Unigene0022323	chr2	1169499	1171559
Unigene0009715	chr2	1255011	1259176
Unigene0009716	chr2	1255011	1259176
Unigene0042267	chr2	1311935	1315699
Unigene0084900	chr2	1362420	1365850
Unigene0039318	chr2	1372667	1375767
Unigene0018691	chr2	1385452	1387785
Unigene0063474	chr2	1404368	1404818
Unigene0043128	chr2	1412802	1416736
Unigene0042057	chr2	1429253	1430419
Unigene0015507	chr2	1446946	1455050
Unigene0015508	chr2	1446946	1452538
Unigene0042648	chr2	1478550	1483368
Unigene0025711	chr2	1535882	1542301
Unigene0025711	chr2	1544043	1568593
Unigene0025711	chr2	1546307	1555102
Unigene0057193	chr2	1548935	1556653
Unigene0046499	chr2	1569779	1577996
Unigene0046952	chr2	1583059	1586073
Unigene0039322	chr2	1664371	1665731
Unigene0059112	chr2	1695493	1696664
Unigene0063490	chr2	1696659	1696891
Unigene0059112	chr2	1702893	1705075
Unigene0080352	chr2	1706730	1706981
Unigene0028572	chr2	1744350	1751659
Unigene0028573	chr2	1744350	1751659
Unigene0028576	chr2	1744350	1751659
Unigene0028577	chr2	1744350	1751659
Unigene0028574	chr2	1746060	1751659
Unigene0028575	chr2	1746060	1751659
Unigene0015734	chr2	1760788	1771331
Unigene0015735	chr2	1760788	1771331
Unigene0070651	chr2	1827396	1827976
Unigene0042107	chr2	1875564	1879499
Unigene0084856	chr2	1893137	1894114
Unigene0082375	chr2	1895312	1895983
Unigene0008057	chr2	1912719	1917122
Unigene0028222	chr2	1921611	1925056
Unigene0028224	chr2	1921611	1932654
Unigene0028227	chr2	1921611	1930866
Unigene0028229	chr2	1921611	1932654
Unigene0028236	chr2	1921611	1930866
Unigene0028238	chr2	1921611	1928078
Unigene0028223	chr2	1927957	1932654
Unigene0028228	chr2	1927957	1930866
Unigene0028234	chr2	1927957	1930866
Unigene0028237	chr2	1927957	1932654
Unigene0028233	chr2	1929534	1929843
Unigene0028225	chr2	1929925	1930866
Unigene0028226	chr2	1929925	1930866
Unigene0028230	chr2	1929925	1932654
Unigene0028232	chr2	1929925	1932654
Unigene0085742	chr2	1930993	1932654
Unigene0044249	chr2	1980486	1986294
Unigene0010637	chr2	1994548	1997905
Unigene0010638	chr2	1994548	1997905
Unigene0024802	chr2	2117491	2120362
Unigene0042549	chr2	2134692	2146525
Unigene0045357	chr2	2179971	2180737
Unigene0020119	chr2	2180009	2185048
Unigene0047755	chr2	2184803	2185746
Unigene0000952	chr2	2190876	2191706
Unigene0047191	chr2	2204306	2204586
Unigene0006038	chr2	2206566	2209033
Unigene0001982	chr2	2245165	2245796
Unigene0008046	chr2	2281621	2287811
Unigene0045062	chr2	2307937	2308244
Unigene0043726	chr2	2337418	2345017
Unigene0085546	chr2	2363837	2374019
Unigene0087035	chr2	2363837	2374019
Unigene0047768	chr2	2379126	2380587
Unigene0070904	chr2	2459954	2460491
Unigene0014176	chr2	2466081	2467620
Unigene0014177	chr2	2466081	2467620
Unigene0005448	chr2	2477057	2479730
Unigene0008872	chr2	2534060	2537260
Unigene0049887	chr2	2614525	2617606
Unigene0004526	chr2	2723997	2726357
Unigene0068643	chr2	2755374	2757058
Unigene0066256	chr2	2793479	2794148
Unigene0066211	chr2	2794171	2796777
Unigene0080385	chr2	2797408	2797563
Unigene0004789	chr2	2880832	2886635
Unigene0004790	chr2	2880832	2886404
Unigene0084261	chr2	3042709	3052709
Unigene0087129	chr2	3042709	3052709
Unigene0079388	chr2	3055567	3055835
Unigene0042517	chr2	3066685	3072123
Unigene0043475	chr2	3097077	3100338
Unigene0041616	chr2	3116332	3120994
Unigene0033462	chr2	3128209	3128824
Unigene0000494	chr2	3128221	3128750
Unigene0061490	chr2	3128731	3129164
Unigene0079388	chr2	3203011	3203279
Unigene0042517	chr2	3214130	3219570
Unigene0043475	chr2	3244539	3247800
Unigene0037945	chr2	3261092	3261230
Unigene0041616	chr2	3263796	3268437
Unigene0043743	chr2	3274687	3277617
Unigene0043295	chr2	3286361	3291311
Unigene0046404	chr2	3321709	3326623
Unigene0016586	chr2	3328787	3332757
Unigene0016587	chr2	3328787	3332757
Unigene0007048	chr2	3329951	3330297
Unigene0006174	chr2	3371220	3371709
Unigene0086193	chr2	3396854	3413171
Unigene0044586	chr2	3470555	3473950
Unigene0043002	chr2	3488883	3493858
Unigene0048918	chr2	3498565	3501209
Unigene0005983	chr2	3501185	3509029
Unigene0074011	chr2	3531146	3531500
Unigene0074011	chr2	3556002	3556699
Unigene0079044	chr2	3611991	3612386
Unigene0003508	chr2	3628847	3634945
Unigene0003509	chr2	3628847	3634945
Unigene0017744	chr2	3642497	3647730
Unigene0017745	chr2	3642497	3647730
Unigene0017746	chr2	3642497	3647730
Unigene0017747	chr2	3642497	3647730
Unigene0017748	chr2	3642497	3647730
Unigene0017749	chr2	3642497	3647730
Unigene0034062	chr2	3659783	3661130
Unigene0013882	chr2	3663368	3672900
Unigene0013883	chr2	3663368	3672900
Unigene0013884	chr2	3663368	3672900
Unigene0013885	chr2	3663368	3672900
Unigene0083439	chr2	3665162	3665780
Unigene0039498	chr2	3675745	3677294
Unigene0076257	chr2	3708034	3708436
Unigene0072173	chr2	3708439	3709100
Unigene0041816	chr2	3710227	3714163
Unigene0018939	chr2	3764575	3772632
Unigene0018940	chr2	3764575	3772632
Unigene0018941	chr2	3764575	3772632
Unigene0003880	chr2	3984616	3991129
Unigene0003881	chr2	3984616	3991129
Unigene0015185	chr2	4188814	4189817
Unigene0015188	chr2	4188814	4189817
Unigene0081943	chr2	4228930	4238056
Unigene0084814	chr2	4228930	4238056
Unigene0023158	chr2	4232261	4238056
Unigene0023160	chr2	4232261	4238056
Unigene0010358	chr2	4257367	4262897
Unigene0008447	chr2	4286156	4290716
Unigene0077389	chr2	4287488	4287630
Unigene0072108	chr2	4288818	4289377
Unigene0010340	chr2	4381327	4396082
Unigene0071772	chr2	4401319	4402255
Unigene0007517	chr2	4407571	4409468
Unigene0007518	chr2	4407571	4408873
Unigene0052527	chr2	4437321	4438172
Unigene0047035	chr2	4455290	4455688
Unigene0011881	chr2	4504851	4505022
Unigene0071580	chr2	4512988	4513241
Unigene0044294	chr2	4532235	4534062
Unigene0011881	chr2	4574016	4574149
Unigene0048549	chr2	4579095	4583270
Unigene0047416	chr2	4591123	4596721
Unigene0045630	chr2	4631366	4632057
Unigene0045735	chr2	4633854	4634300
Unigene0003714	chr2	4660645	4667175
Unigene0003715	chr2	4660645	4667175
Unigene0028395	chr2	4745773	4757711
Unigene0028408	chr2	4745773	4757711
Unigene0028426	chr2	4745773	4757711
Unigene0028442	chr2	4745773	4757711
Unigene0028446	chr2	4745773	4757711
Unigene0028366	chr2	4745978	4757711
Unigene0028409	chr2	4745978	4757711
Unigene0028416	chr2	4745978	4757711
Unigene0028472	chr2	4745978	4757711
Unigene0028485	chr2	4745978	4757711
Unigene0075096	chr2	4748594	4748895
Unigene0018640	chr2	4772898	4784268
Unigene0018639	chr2	4779480	4784268
Unigene0026125	chr2	4794466	4795013
Unigene0084294	chr2	4799490	4804190
Unigene0041936	chr2	4808105	4810470
Unigene0033761	chr2	4876963	4879577
Unigene0033762	chr2	4878784	4879229
Unigene0002686	chr2	4884312	4886658
Unigene0049924	chr2	4896364	4919640
Unigene0037435	chr2	4928633	4929931
Unigene0031853	chr2	4966938	5012047
Unigene0082446	chr2	4966938	5012047
Unigene0084244	chr2	4966938	5012047
Unigene0084926	chr2	4966938	5012047
Unigene0084930	chr2	4966938	5012047
Unigene0085518	chr2	4966938	5012047
Unigene0085657	chr2	4966938	5012047
Unigene0031854	chr2	5005879	5012047
Unigene0018946	chr2	5350700	5354334
Unigene0060657	chr2	5363135	5363410
Unigene0048456	chr2	5376029	5382541
Unigene0000969	chr2	5443065	5443432
Unigene0077402	chr2	5443719	5444848
Unigene0046688	chr2	5446643	5451824
Unigene0011401	chr2	5465010	5471277
Unigene0011402	chr2	5465010	5471277
Unigene0039653	chr2	5480651	5483052
Unigene0031188	chr2	5618758	5621731
Unigene0043335	chr2	5625265	5629818
Unigene0034257	chr2	5664122	5666023
Unigene0069601	chr2	5742729	5749764
Unigene0069601	chr2	5742764	5743126
Unigene0002996	chr2	5774560	5779240
Unigene0002997	chr2	5774560	5779240
Unigene0043797	chr2	5788927	5789510
Unigene0043537	chr2	5789565	5791408
Unigene0045597	chr2	5791569	5793900
Unigene0029654	chr2	5822757	5828790
Unigene0029659	chr2	5822757	5828790
Unigene0043175	chr2	5837489	5844000
Unigene0018804	chr2	6046026	6065010
Unigene0005553	chr2	6141640	6147842
Unigene0012924	chr2	6174578	6177891
Unigene0084524	chr2	6174578	6177891
Unigene0042995	chr2	6204115	6218656
Unigene0086755	chr2	6257754	6259131
Unigene0077521	chr2	6315919	6316200
Unigene0070722	chr2	6317147	6318490
Unigene0002522	chr2	6325749	6328135
Unigene0015297	chr2	6336571	6345217
Unigene0040104	chr2	6409397	6414536
Unigene0040105	chr2	6409397	6414536
Unigene0040106	chr2	6409397	6414536
Unigene0040113	chr2	6409397	6414536
Unigene0035195	chr2	6436048	6438678
Unigene0004000	chr2	6468130	6469182
Unigene0083670	chr2	6486881	6491838
Unigene0046706	chr2	6509377	6516719
Unigene0044096	chr2	6562583	6568408
Unigene0024495	chr2	6574250	6581976
Unigene0024496	chr2	6574250	6583091
Unigene0082923	chr2	6590386	6594787
Unigene0086995	chr2	6590386	6594787
Unigene0043473	chr2	6602889	6606255
Unigene0046036	chr2	6647144	6648582
Unigene0016202	chr2	6662509	6667679
Unigene0011350	chr2	6697797	6701849
Unigene0011352	chr2	6697797	6701849
Unigene0011351	chr2	6697848	6701849
Unigene0011353	chr2	6697848	6701849
Unigene0045741	chr2	6740018	6746567
Unigene0037037	chr2	6879474	6879907
Unigene0031720	chr2	6885629	6890939
Unigene0031721	chr2	6885629	6891808
Unigene0031723	chr2	6885629	6891808
Unigene0031724	chr2	6885629	6890939
Unigene0031727	chr2	6885629	6891808
Unigene0031728	chr2	6885629	6890939
Unigene0031729	chr2	6885629	6891808
Unigene0031730	chr2	6885629	6891808
Unigene0085003	chr2	6885629	6891808
Unigene0005128	chr2	6895446	6900586
Unigene0054172	chr2	6898251	6898677
Unigene0004420	chr2	6932593	6934585
Unigene0004421	chr2	6932593	6934497
Unigene0004740	chr2	6942581	6944455
Unigene0014229	chr2	6984749	6988100
Unigene0014231	chr2	6984749	6988100
Unigene0046966	chr2	7002200	7003061
Unigene0046966	chr2	7009014	7009996
Unigene0051215	chr2	7044226	7044927
Unigene0007793	chr2	7060129	7067718
Unigene0007794	chr2	7060129	7067718
Unigene0044652	chr2	7071048	7082405
Unigene0041874	chr2	7101368	7103775
Unigene0003246	chr2	7111080	7112536
Unigene0082866	chr2	7141922	7147124
Unigene0040902	chr2	7156829	7160149
Unigene0040902	chr2	7168076	7172932
Unigene0081311	chr2	7183674	7183905
Unigene0001646	chr2	7186308	7186552
Unigene0068420	chr2	7197867	7198485
Unigene0053694	chr2	7199607	7202367
Unigene0047534	chr2	7213454	7213982
Unigene0047495	chr2	7213960	7214186
Unigene0019251	chr2	7642782	7649397
Unigene0043195	chr2	7704037	7706097
Unigene0048523	chr2	7713465	7717584
Unigene0043551	chr2	7734386	7739033
Unigene0039578	chr2	7911102	7911931
Unigene0043578	chr2	7913835	7919539
Unigene0043272	chr2	7941655	7946289
Unigene0041939	chr2	7952379	7956898
Unigene0006049	chr2	7991955	7994971
Unigene0042537	chr2	8178951	8182269
Unigene0064655	chr2	8226987	8227969
Unigene0087031	chr2	8235376	8239336
Unigene0048674	chr2	8392084	8392953
Unigene0012082	chr2	8739708	8755443
Unigene0072773	chr2	8748520	8748684
Unigene0030240	chr2	8761731	8762602
Unigene0042219	chr2	8769657	8774671
Unigene0019769	chr2	8824064	8827262
Unigene0019770	chr2	8824064	8827262
Unigene0019771	chr2	8824064	8827284
Unigene0019772	chr2	8824064	8827262
Unigene0019773	chr2	8824064	8827284
Unigene0019774	chr2	8824064	8827262
Unigene0019775	chr2	8824064	8827284
Unigene0019776	chr2	8824064	8827262
Unigene0019777	chr2	8824064	8827262
Unigene0019778	chr2	8824064	8827262
[truncated: 9,965 more rows]

## Sheet: 1
Unigene0066599	chr1	162994	163253
Unigene0065344	chr1	163248	163932
Unigene0050310	chr1	164502	165373
Unigene0076505	chr1	165714	166185
Unigene0085100	chr1	167401	174613
Unigene0085102	chr1	167401	174613
Unigene0085101	chr1	169816	174613
Unigene0058941	chr1	170538	171190
Unigene0065948	chr1	171200	171449
Unigene0060407	chr1	171439	172368
Unigene0069350	chr1	172346	172737
Unigene0023107	chr1	172797	174613
Unigene0014381	chr1	174678	176639
Unigene0076356	chr1	177624	177859
Unigene0067777	chr1	177957	178190
Unigene0075683	chr1	178794	179054
Unigene0003302	chr1	186053	186704
Unigene0056739	chr1	186955	187836
Unigene0000289	chr1	187829	188094
Unigene0062486	chr1	197876	198263
Unigene0040012	chr1	199060	199546
Unigene0077610	chr1	203220	203479
Unigene0008223	chr1	203791	204674
Unigene0070642	chr1	204841	205059
Unigene0040002	chr1	205730	207332
Unigene0054624	chr1	207386	208443
Unigene0013050	chr1	223148	225910
Unigene0041620	chr1	242801	479172
Unigene0070642	chr1	243843	244060
Unigene0040002	chr1	244701	246303
Unigene0056331	chr1	256545	257527
Unigene0001435	chr1	257768	258338
Unigene0069063	chr1	258531	258847
Unigene0001970	chr1	258838	275599
Unigene0079286	chr1	265763	265974
Unigene0073889	chr1	266018	266246
Unigene0074612	chr1	268862	269160
Unigene0020433	chr1	269220	269538
Unigene0020434	chr1	269220	269708
Unigene0054389	chr1	269721	270260
Unigene0053510	chr1	270384	271324
Unigene0066241	chr1	272706	273125
Unigene0001970	chr1	273117	273502
Unigene0069063	chr1	273493	273809
Unigene0001435	chr1	274002	274571
Unigene0056331	chr1	274812	275369
Unigene0053720	chr1	275897	276882
Unigene0087028	chr1	276950	279057
Unigene0012138	chr1	279033	279797
Unigene0076075	chr1	285046	285214
Unigene0079604	chr1	290876	291095
Unigene0010494	chr1	299463	478205
Unigene0015850	chr1	305249	398352
Unigene0075478	chr1	313612	313861
Unigene0080564	chr1	319010	319217
Unigene0073629	chr1	321877	322296
Unigene0074015	chr1	322306	322676
Unigene0080757	chr1	322980	323264
Unigene0040001	chr1	324565	326214
Unigene0000289	chr1	326224	326484
Unigene0062486	chr1	336272	336659
Unigene0040012	chr1	337457	337944
Unigene0077610	chr1	341631	341891
Unigene0008223	chr1	342203	343085
Unigene0070642	chr1	343252	343470
Unigene0040002	chr1	344141	347321
Unigene0054624	chr1	345794	347172
Unigene0039997	chr1	347299	364491
Unigene0040006	chr1	347299	474952
Unigene0040008	chr1	347299	364491
Unigene0040013	chr1	347299	417654
Unigene0040004	chr1	350688	364491
Unigene0047401	chr1	352876	353216
Unigene0012138	chr1	359463	360228
Unigene0087028	chr1	360204	362312
Unigene0053720	chr1	362380	418769
Unigene0055096	chr1	365625	366417
Unigene0056331	chr1	371830	372807
Unigene0001435	chr1	373048	373617
Unigene0069063	chr1	373810	374126
Unigene0001970	chr1	374117	374502
Unigene0066241	chr1	374494	374916
Unigene0053510	chr1	376298	377236
Unigene0054389	chr1	377360	377899
Unigene0020434	chr1	377912	378399
Unigene0020433	chr1	378081	378399
Unigene0074612	chr1	378459	378757
Unigene0073889	chr1	381368	381595
Unigene0079286	chr1	381639	381850
Unigene0041620	chr1	390845	391640
Unigene0041803	chr1	391621	392196
Unigene0017689	chr1	392231	392995
Unigene0015850	chr1	398040	398352
Unigene0053720	chr1	403920	404938
Unigene0087028	chr1	405006	446667
Unigene0012138	chr1	407089	407855
Unigene0076075	chr1	413103	413271
Unigene0039997	chr1	414390	418748
Unigene0040008	chr1	414390	418748
Unigene0047401	chr1	419790	420130
Unigene0017689	chr1	420107	421131
Unigene0041803	chr1	421166	421741
Unigene0041620	chr1	421722	422517
Unigene0079286	chr1	431512	431723
Unigene0073889	chr1	431767	431994
Unigene0077201	chr1	433871	434052
Unigene0062202	chr1	439571	440664
Unigene0056246	chr1	440972	441635
Unigene0070625	chr1	441988	442253
Unigene0039999	chr1	443616	444591
Unigene0085610	chr1	444574	446667
Unigene0048525	chr1	445549	446464
Unigene0072804	chr1	452190	452391
Unigene0040005	chr1	454564	458113
Unigene0040017	chr1	454919	458113
Unigene0056776	chr1	458121	458992
Unigene0055682	chr1	461836	462378
Unigene0006147	chr1	462916	463477
Unigene0040014	chr1	463567	465929
Unigene0000531	chr1	465917	467975
Unigene0060453	chr1	466247	466900
Unigene0077079	chr1	467042	467282
Unigene0064497	chr1	467265	467663
Unigene0042982	chr1	474931	475168
Unigene0041693	chr1	475146	476568
Unigene0042127	chr1	476573	477180
Unigene0001970	chr1	533498	533883
Unigene0069063	chr1	533874	534190
Unigene0001435	chr1	534383	534952
Unigene0056331	chr1	535195	535752
Unigene0047085	chr1	549741	549945
Unigene0063430	chr1	592483	593131
Unigene0046821	chr1	644018	655233
Unigene0079286	chr1	665048	665259
Unigene0073889	chr1	665303	665530
Unigene0074612	chr1	668141	668439
Unigene0020433	chr1	668499	668817
Unigene0020434	chr1	668499	668986
Unigene0054389	chr1	668999	669538
Unigene0053510	chr1	669662	670603
Unigene0066241	chr1	671985	672404
Unigene0001970	chr1	672396	672781
Unigene0069063	chr1	672772	673088
Unigene0001435	chr1	673281	673850
Unigene0056331	chr1	674091	675068
Unigene0055096	chr1	680484	681276
Unigene0053720	chr1	683503	684525
Unigene0087028	chr1	684593	686701
Unigene0012138	chr1	686677	687442
Unigene0076075	chr1	692690	692858
Unigene0039997	chr1	693979	697668
Unigene0040008	chr1	693979	697118
Unigene0040013	chr1	693979	697247
Unigene0010621	chr1	742272	749372
Unigene0010622	chr1	742272	749372
Unigene0015189	chr1	754574	760578
Unigene0015190	chr1	754574	760578
Unigene0033410	chr1	772931	774024
Unigene0002836	chr1	777319	781157
Unigene0002837	chr1	777319	784233
Unigene0039666	chr1	844100	850657
Unigene0013977	chr1	876942	881115
Unigene0048002	chr1	896614	904437
Unigene0045345	chr1	967045	969817
Unigene0019132	chr1	970777	999277
Unigene0019133	chr1	970777	999277
Unigene0019132	chr1	972102	974258
Unigene0019133	chr1	972102	974258
Unigene0019132	chr1	978455	981362
Unigene0019132	chr1	1008766	1011914
Unigene0019133	chr1	1008766	1011914
Unigene0010402	chr1	1014710	1016201
Unigene0057408	chr1	1020137	1021269
Unigene0033088	chr1	1031606	1038209
Unigene0033089	chr1	1031606	1040360
Unigene0033090	chr1	1031606	1040413
Unigene0033091	chr1	1031606	1038209
Unigene0033092	chr1	1031606	1038209
Unigene0033093	chr1	1031606	1038209
Unigene0033095	chr1	1031606	1040360
Unigene0033097	chr1	1031606	1038209
Unigene0033098	chr1	1031606	1040413
Unigene0033099	chr1	1031606	1038209
Unigene0082225	chr1	1031606	1040360
Unigene0083401	chr1	1031606	1040360
Unigene0084536	chr1	1031606	1040360
Unigene0085903	chr1	1031606	1040360
Unigene0033087	chr1	1035687	1040413
Unigene0033094	chr1	1035687	1038209
Unigene0033096	chr1	1035687	1040360
Unigene0044114	chr1	1042775	1045049
Unigene0019027	chr1	1051356	1057464
Unigene0003981	chr1	1134831	1138883
Unigene0009495	chr1	1146149	1146449
Unigene0083992	chr1	1165918	1172334
Unigene0086656	chr1	1165918	1172333
Unigene0023187	chr1	1176405	1180754
Unigene0023190	chr1	1176405	1180754
Unigene0047046	chr1	1303128	1306990
Unigene0045341	chr1	1307112	1308036
Unigene0042309	chr1	1374972	1379354
Unigene0019395	chr1	1385527	1401111
Unigene0048245	chr1	1394124	1394494
Unigene0048245	chr1	1401017	1401295
Unigene0027279	chr1	1406908	1408143
Unigene0027276	chr1	1408102	1411403
Unigene0044550	chr1	1431313	1435877
Unigene0085649	chr1	1440999	1449425
Unigene0054376	chr1	1456492	1459384
Unigene0086532	chr1	1546431	1548216
Unigene0086533	chr1	1546431	1553918
Unigene0048403	chr1	1597713	1600922
Unigene0046899	chr1	1665472	1674895
Unigene0046899	chr1	1735834	1745367
Unigene0043453	chr1	1758461	1758865
Unigene0044421	chr1	1758843	1759225
Unigene0043214	chr1	1759212	1759587
Unigene0047129	chr1	1765191	1767171
Unigene0044564	chr1	1825243	1835371
Unigene0036869	chr1	1892123	1994748
Unigene0036870	chr1	1897066	1994748
Unigene0071040	chr1	1899368	1899851
Unigene0046737	chr1	1914284	1953150
Unigene0047764	chr1	1922948	1923222
Unigene0036870	chr1	1981445	2015190
Unigene0071040	chr1	1983749	1984232
Unigene0048336	chr1	1986470	1989007
Unigene0036871	chr1	1994764	1995197
Unigene0036871	chr1	1996267	1996700
Unigene0036871	chr1	2015206	2015639
Unigene0013046	chr1	2020558	2024880
Unigene0085362	chr1	2032184	2042096
Unigene0011451	chr1	2063092	2063547
Unigene0014185	chr1	2067588	2074311
Unigene0004629	chr1	2354955	2358168
Unigene0019684	chr1	2425811	2434529
Unigene0019685	chr1	2425811	2434529
Unigene0081516	chr1	2425811	2434529
Unigene0081517	chr1	2425811	2434529
Unigene0044397	chr1	2434337	2436368
Unigene0013367	chr1	2459359	2462227
Unigene0030107	chr1	2483310	2492848
Unigene0030108	chr1	2483310	2492726
Unigene0030109	chr1	2483310	2492726
Unigene0042724	chr1	2635072	2635359
Unigene0041332	chr1	2635342	2637038
Unigene0042100	chr1	2675679	2679053
Unigene0012829	chr1	2726476	2728066
Unigene0012830	chr1	2726476	2728066
Unigene0033026	chr1	2729789	2732030
Unigene0033027	chr1	2729789	2731109
Unigene0033028	chr1	2729789	2732608
Unigene0084621	chr1	2729789	2732576
Unigene0012830	chr1	2743152	2744739
Unigene0020991	chr1	2876716	2886419
Unigene0020993	chr1	2876716	2886419
Unigene0020990	chr1	2876826	2886419
Unigene0020992	chr1	2876826	2886419
Unigene0045693	chr1	2904285	2906387
Unigene0009980	chr1	2945220	2948795
Unigene0043043	chr1	2963598	2968835
Unigene0058813	chr1	3312591	3312908
Unigene0057894	chr1	3312893	3313458
Unigene0053676	chr1	3314990	3317584
Unigene0071215	chr1	3317565	3317736
Unigene0004580	chr1	3330500	3335784
Unigene0004581	chr1	3330500	3335784
Unigene0042133	chr1	3458017	3464390
Unigene0034264	chr1	3477777	3478571
Unigene0037820	chr1	3478872	3479105
Unigene0044793	chr1	3609969	3619483
Unigene0025864	chr1	3646781	3650287
Unigene0004069	chr1	3671569	3675889
Unigene0017011	chr1	3696350	3700624
Unigene0017013	chr1	3696350	3700624
Unigene0048537	chr1	3725517	3729889
Unigene0055118	chr1	3774781	3777326
Unigene0077897	chr1	4061143	4061647
Unigene0050299	chr1	4066836	4067684
Unigene0005313	chr1	4126243	4135397
Unigene0005314	chr1	4126243	4135397
Unigene0077737	chr1	4127916	4128342
Unigene0007214	chr1	4184538	4188769
Unigene0005313	chr1	4213224	4223064
Unigene0005314	chr1	4213224	4223124
Unigene0077737	chr1	4220279	4220705
Unigene0058939	chr1	4245302	4245890
Unigene0003849	chr1	4266553	4273440
Unigene0073337	chr1	4276823	4277125
Unigene0003849	chr1	4281026	4285486
Unigene0073337	chr1	4287349	4287667
Unigene0021939	chr1	4351918	4374129
Unigene0048748	chr1	4354523	4357530
Unigene0018608	chr1	4421439	4426196
Unigene0018609	chr1	4421439	4427529
Unigene0004520	chr1	4477601	4481910
Unigene0080685	chr1	4493241	4493421
Unigene0049331	chr1	4561715	4563214
Unigene0025090	chr1	4602567	4604490
Unigene0025091	chr1	4602567	4605481
Unigene0025089	chr1	4605268	4605481
Unigene0043202	chr1	4614373	4614707
Unigene0044330	chr1	4617784	4622266
Unigene0003781	chr1	4669991	4677478
Unigene0014279	chr1	4702474	4707689
Unigene0006041	chr1	4710319	4720260
Unigene0076897	chr1	4715746	4715982
Unigene0017540	chr1	4771192	4776784
Unigene0017541	chr1	4771192	4776784
Unigene0022407	chr1	4779794	4785081
Unigene0022408	chr1	4779794	4783744
Unigene0022409	chr1	4779794	4785081
Unigene0022410	chr1	4779794	4783744
Unigene0066174	chr1	4798602	4798966
Unigene0071692	chr1	4798994	4799210
Unigene0085525	chr1	4815529	4820881
Unigene0048521	chr1	4857060	4859797
Unigene0048058	chr1	4860161	4861523
Unigene0085525	chr1	4892987	4898347
Unigene0027701	chr1	4929331	4930388
Unigene0020328	chr1	4934580	4941206
Unigene0012516	chr1	4945044	4945178
Unigene0048046	chr1	5154850	5157096
Unigene0003576	chr1	5194149	5200115
Unigene0003577	chr1	5194149	5200115
Unigene0024726	chr1	5268519	5270345
Unigene0003994	chr1	5302863	5315388
Unigene0052792	chr1	5346780	5347528
Unigene0054918	chr1	5348449	5348919
Unigene0024726	chr1	5361077	5362902
Unigene0020694	chr1	5378605	5384019
Unigene0083711	chr1	5378605	5380727
Unigene0020695	chr1	5381048	5381613
Unigene0003994	chr1	5428213	5440991
Unigene0003265	chr1	5530160	5531053
Unigene0045882	chr1	5561953	5565480
Unigene0045076	chr1	5671940	5679935
Unigene0060137	chr1	5727380	5728185
Unigene0018575	chr1	5738821	5749647
Unigene0018576	chr1	5738821	5749609
Unigene0035448	chr1	5774852	5778314
Unigene0048656	chr1	5775806	5776911
Unigene0001900	chr1	5860362	5861885
Unigene0038502	chr1	5864655	5869514
Unigene0040719	chr1	5968700	5970833
Unigene0074330	chr1	6018058	6018717
Unigene0060336	chr1	6041393	6041798
Unigene0059013	chr1	6041787	6043000
Unigene0003099	chr1	6049642	6057436
Unigene0076505	chr1	6063548	6063892
Unigene0044330	chr1	6094261	6098074
Unigene0049462	chr1	6161114	6162524
Unigene0049803	chr1	6162502	6163758
Unigene0023408	chr1	6180278	6188553
Unigene0009680	chr1	6238468	6238865
Unigene0082484	chr1	6350613	6353475
Unigene0082903	chr1	6350613	6353475
Unigene0084243	chr1	6350613	6353564
Unigene0086240	chr1	6350613	6353564
Unigene0037680	chr1	6382987	6386643
Unigene0002632	chr1	6398945	6403683
Unigene0013199	chr1	6460143	6461301
Unigene0051910	chr1	6576269	6579463
Unigene0018394	chr1	6597797	6603828
Unigene0018395	chr1	6597797	6603828
Unigene0018396	chr1	6597797	6603828
Unigene0018397	chr1	6597797	6603828
Unigene0012443	chr1	6653906	6657689
Unigene0012444	chr1	6653906	6657689
Unigene0014647	chr1	6658256	6671046
Unigene0014650	chr1	6658256	6671046
Unigene0044765	chr1	6679358	6681841
Unigene0043269	chr1	6987340	6989045
Unigene0047077	chr1	6991257	6997645
Unigene0048076	chr1	7024056	7027020
Unigene0032231	chr1	7067081	7070844
Unigene0045012	chr1	7067236	7067753
Unigene0074403	chr1	7087240	7087422
Unigene0045020	chr1	7089765	7091317
Unigene0009299	chr1	7140095	7140287
Unigene0003583	chr1	7196914	7202526
Unigene0006143	chr1	7210298	7214490
Unigene0026733	chr1	7264915	7273748
Unigene0024067	chr1	7278089	7288824
Unigene0007589	chr1	7342958	7344848
Unigene0060922	chr1	7363831	7371180
Unigene0060922	chr1	7363959	7364867
Unigene0060922	chr1	7375516	7377959
Unigene0008827	chr1	7739673	7743014
Unigene0024639	chr1	7891915	7895588
Unigene0024637	chr1	7895803	7897661
Unigene0010542	chr1	7897151	7898396
Unigene0003770	chr1	7973904	7978982
Unigene0047742	chr1	7979678	7984167
Unigene0083769	chr1	7987647	7988891
Unigene0003792	chr1	7989694	7991899
Unigene0003793	chr1	7989694	7991899
Unigene0003770	chr1	7994459	8002683
Unigene0006899	chr1	8019969	8027039
Unigene0013520	chr1	8031661	8034150
Unigene0042388	chr1	8083788	8087273
Unigene0051353	chr1	8091195	8092028
Unigene0005631	chr1	8112849	8115661
Unigene0000980	chr1	8198393	8199721
Unigene0035436	chr1	8235746	8241037
Unigene0047482	chr1	8266392	8269993
Unigene0001921	chr1	8283136	8285991
Unigene0016069	chr1	8304323	8311272
Unigene0046486	chr1	8395189	8398183
Unigene0046517	chr1	8398168	8399627
Unigene0008903	chr1	8487366	8490872
Unigene0043392	chr1	8489911	8490651
Unigene0014245	chr1	8533107	8537956
Unigene0014246	chr1	8533107	8537956
Unigene0014247	chr1	8533107	8537956
Unigene0014248	chr1	8533107	8537956
Unigene0014923	chr1	8546261	8550211
Unigene0059548	chr1	8547628	8547936
Unigene0014922	chr1	8547944	8550211
Unigene0049870	chr1	8550114	8551913
Unigene0042461	chr1	8803173	8810093
Unigene0038452	chr1	8827097	8827416
Unigene0046920	chr1	8831103	8831332
Unigene0008467	chr1	8831680	8832201
Unigene0008468	chr1	8831680	8832201
Unigene0007092	chr1	8872392	8878161
Unigene0009406	chr1	8880687	8882382
Unigene0044024	chr1	9067964	9071306
Unigene0009908	chr1	9108137	9125257
Unigene0047934	chr1	9127663	9129344
Unigene0026727	chr1	9291422	9295929
Unigene0026728	chr1	9291422	9296913
Unigene0026731	chr1	9291422	9296913
Unigene0030377	chr1	9335639	9353153
Unigene0033192	chr1	9393301	9396607
Unigene0026015	chr1	9648866	9649632
Unigene0072052	chr1	9685170	9685561
Unigene0003432	chr1	9707207	9712633
Unigene0005680	chr1	9712613	9713186
Unigene0041359	chr1	9808053	9813582
Unigene0045178	chr1	9821831	9826844
Unigene0015979	chr1	10098189	10126821
Unigene0086728	chr1	10098189	10126821
Unigene0004948	chr1	10165325	10178139
Unigene0004949	chr1	10165325	10178139
Unigene0038153	chr1	10252532	10253853
Unigene0038141	chr1	10252538	10253852
Unigene0078896	chr1	10281992	10283276
Unigene0008747	chr1	10302771	10308002
Unigene0055529	chr1	10303900	10304284
Unigene0013450	chr1	10310223	10314598
Unigene0013451	chr1	10310223	10314598
Unigene0019246	chr1	10314576	10321561
Unigene0019248	chr1	10314576	10321561
Unigene0019249	chr1	10314576	10321561
Unigene0019250	chr1	10314576	10321561
Unigene0019245	chr1	10316791	10321561
Unigene0019247	chr1	10316791	10321561
Unigene0044240	chr1	10359733	10371850
Unigene0059434	chr1	10414888	10415133
Unigene0044240	chr1	10467609	10479726
Unigene0031386	chr1	10482805	10485687
Unigene0031425	chr1	10486348	10486631
Unigene0031425	chr1	10510131	10510414
Unigene0031425	chr1	10588818	10588949
Unigene0042803	chr1	10604297	10611116
Unigene0045150	chr1	10614126	10617215
Unigene0045150	chr1	10620221	10625560
Unigene0011529	chr1	10834222	10838677
Unigene0011530	chr1	10834222	10838677
Unigene0011531	chr1	10834222	10838727
Unigene0011532	chr1	10834222	10838727
Unigene0043499	chr1	10846085	10850595
Unigene0005751	chr1	11075573	11081205
Unigene0005752	chr1	11075573	11081205
Unigene0077051	chr1	11093600	11093847
Unigene0036182	chr1	11124433	11129696
Unigene0036188	chr1	11124433	11129696
Unigene0036193	chr1	11126321	11129696
Unigene0038309	chr1	11181389	11181532
Unigene0042287	chr1	11390713	11395113
Unigene0045692	chr1	11418248	11423050
Unigene0046154	chr1	11423169	11424179
Unigene0044958	chr1	11425527	11434202
Unigene0044024	chr1	11434181	11439291
Unigene0021923	chr1	11805844	11812233
Unigene0021930	chr1	11805844	11812233
Unigene0021928	chr1	11808059	11812233
Unigene0021937	chr1	11808059	11812233
Unigene0016513	chr1	12072245	12074186
Unigene0043571	chr1	12074167	12076157
Unigene0027038	chr1	12082464	12089138
Unigene0020023	chr1	12262923	12266149
Unigene0020025	chr1	12262923	12266149
Unigene0020026	chr1	12263482	12266149
Unigene0020027	chr1	12263514	12266149
Unigene0020024	chr1	12263674	12266149
Unigene0013190	chr1	12446024	12446341
Unigene0011997	chr1	12468699	12471559
Unigene0038865	chr1	13103741	13113962
Unigene0004281	chr1	13151681	13152944
Unigene0037752	chr1	13194648	13195506
Unigene0031666	chr1	13224958	13229489
Unigene0030072	chr1	13289563	13306812
Unigene0017898	chr1	13333588	13336389
Unigene0035241	chr1	13340831	13343987
Unigene0084403	chr1	13340831	13343987
Unigene0035240	chr1	13341053	13343045
Unigene0035238	chr1	13343140	13346035
Unigene0035245	chr1	13343140	13343987
Unigene0035246	chr1	13343140	13346166
Unigene0035237	chr1	13343328	13343987
Unigene0035247	chr1	13343328	13346035
Unigene0035251	chr1	13343328	13346035
Unigene0035253	chr1	13343328	13343987
Unigene0051246	chr1	13387238	13387685
Unigene0070093	chr1	13392064	13392628
Unigene0044614	chr1	13398802	13400315
Unigene0044392	chr1	13543969	13547009
Unigene0032282	chr1	13636140	13649607
Unigene0004679	chr1	13687401	13704844
Unigene0010487	chr1	13714545	13719492
Unigene0035651	chr1	13773739	13783556
Unigene0035652	chr1	13773739	13783633
Unigene0035654	chr1	13773739	13783556
Unigene0035656	chr1	13773739	13783633
Unigene0035658	chr1	13773739	13783633
Unigene0035659	chr1	13773739	13786941
Unigene0035661	chr1	13773739	13783556
Unigene0035662	chr1	13773739	13783633
Unigene0035664	chr1	13773739	13783633
Unigene0035667	chr1	13773739	13783633
Unigene0035669	chr1	13773739	13783556
Unigene0035670	chr1	13773739	13783633
Unigene0035671	chr1	13773739	13783633
Unigene0035672	chr1	13773739	13783633
Unigene0035674	chr1	13773739	13786941
Unigene0035675	chr1	13773739	13786941
Unigene0035678	chr1	13773739	13783633
Unigene0035681	chr1	13773739	13783633
Unigene0035682	chr1	13773739	13783556
Unigene0035684	chr1	13773739	13783633
Unigene0035685	chr1	13773739	13783633
Unigene0035689	chr1	13773739	13786941
Unigene0035691	chr1	13773739	13786941
Unigene0035693	chr1	13773739	13786941
Unigene0035696	chr1	13773739	13783633
Unigene0035697	chr1	13773739	13783633
Unigene0035698	chr1	13773739	13783556
Unigene0035699	chr1	13773739	13783633
Unigene0035701	chr1	13773739	13786941
Unigene0035702	chr1	13773739	13783556
Unigene0035704	chr1	13773739	13783633
Unigene0035653	chr1	13774740	13783556
Unigene0035660	chr1	13774740	13783556
Unigene0035673	chr1	13774740	13783556
Unigene0035703	chr1	13774740	13783556
Unigene0035679	chr1	13775842	13783556
Unigene0035683	chr1	13775842	13777361
Unigene0035695	chr1	13775842	13783556
Unigene0014675	chr1	14164387	14178114
Unigene0014676	chr1	14164387	14178114
Unigene0086109	chr1	14185621	14191847
Unigene0087009	chr1	14220872	14224159
Unigene0009357	chr1	14256985	14264783
Unigene0009358	chr1	14256985	14264541
Unigene0009359	chr1	14256985	14264783
Unigene0043261	chr1	14265922	14270717
Unigene0065549	chr1	14279551	14279766
Unigene0060161	chr1	14279759	14280738
Unigene0047898	chr1	14320860	14328144
Unigene0026182	chr1	14337012	14349024
Unigene0026183	chr1	14337012	14349024
Unigene0026185	chr1	14337012	14349024
Unigene0026187	chr1	14337012	14349024
Unigene0026188	chr1	14337012	14349024
Unigene0026192	chr1	14337012	14349024
Unigene0026194	chr1	14337012	14349024
Unigene0026195	chr1	14337012	14349024
Unigene0026186	chr1	14343843	14349024
Unigene0026191	chr1	14343843	14349024
Unigene0026193	chr1	14343843	14349024
Unigene0026181	chr1	14345003	14349024
Unigene0026184	chr1	14345003	14349024
Unigene0011045	chr1	14358731	14364720
Unigene0011044	chr1	14363090	14364720
Unigene0043376	chr1	14365210	14371993
Unigene0087009	chr1	14385855	14389142
Unigene0061015	chr1	14460472	14461034
Unigene0045088	chr1	14527319	14529637
Unigene0035602	chr1	14803486	14820103
Unigene0035604	chr1	14803486	14820103
Unigene0035613	chr1	14803486	14820103
Unigene0035615	chr1	14803486	14820103
Unigene0046018	chr1	14831188	14841689
Unigene0060161	chr1	15262478	15263430
Unigene0086465	chr1	15271246	15272214
Unigene0045920	chr1	15335020	15340740
Unigene0020452	chr1	15342701	15346176
Unigene0020453	chr1	15342701	15346176
Unigene0020455	chr1	15342701	15346176
Unigene0020456	chr1	15342701	15346176
Unigene0066061	chr1	15682754	15683381
Unigene0021608	chr1	15732367	15738508
Unigene0044450	chr1	15735579	15737128
Unigene0040282	chr1	15766070	15772343
Unigene0040259	chr1	15767409	15772343
Unigene0019292	chr1	15777685	15778974
Unigene0019293	chr1	15777685	15778834
Unigene0019294	chr1	15777685	15779043
Unigene0052266	chr1	15779449	15780140
Unigene0054097	chr1	15780121	15780596
Unigene0043041	chr1	15805063	15809519
Unigene0074058	chr1	15829316	15829495
Unigene0083073	chr1	15832336	15842030
Unigene0083074	chr1	15832336	15842030
Unigene0083075	chr1	15832336	15842039
Unigene0083076	chr1	15832336	15843250
Unigene0083077	chr1	15832336	15842039
Unigene0027611	chr1	15833832	15842039
Unigene0027612	chr1	15833832	15842030
Unigene0027613	chr1	15833832	15842030
Unigene0027614	chr1	15833832	15843250
Unigene0083078	chr1	15833832	15842039
Unigene0010698	chr1	15879009	15883274
Unigene0075010	chr1	15928945	15929095
Unigene0051418	chr1	16004812	16006151
Unigene0038309	chr1	16014117	16014260
Unigene0013576	chr1	16018338	16024293
Unigene0083360	chr1	16018338	16024293
Unigene0038752	chr1	16031237	16031458
Unigene0049773	chr1	16055083	16056096
Unigene0086286	chr1	16282834	16285355
Unigene0026524	chr1	16293327	16296621
Unigene0026526	chr1	16293327	16296621
Unigene0080616	chr1	16302996	16303274
Unigene0059233	chr1	16305469	16306657
Unigene0057305	chr1	16307063	16309253
Unigene0064078	chr1	16309438	16310320
Unigene0009487	chr1	16350953	16364770
Unigene0009488	chr1	16350953	16364770
Unigene0040213	chr1	16354711	16354888
Unigene0035692	chr1	16364748	16380383
Unigene0035668	chr1	16380623	16380956
Unigene0024499	chr1	16395478	16398011
Unigene0024501	chr1	16395605	16398011
Unigene0044365	chr1	16487161	16490266
Unigene0004257	chr1	16736612	16740989
Unigene0048398	chr1	16774178	16775179
Unigene0042811	chr1	17066276	17067214
Unigene0004553	chr1	17098563	17101356
Unigene0048020	chr1	17318276	17318961
Unigene0047103	chr1	17328468	17332634
Unigene0008312	chr1	17354052	17356635
Unigene0008313	chr1	17354052	17356635
Unigene0082362	chr1	17357068	17358913
Unigene0019269	chr1	17358043	17358913
Unigene0064358	chr1	17447490	17447702
Unigene0030816	chr1	17518243	17523813
Unigene0030818	chr1	17523847	17537184
Unigene0050700	chr1	17570223	17573237
Unigene0051841	chr1	17573218	17573456
Unigene0051429	chr1	17573489	17574131
Unigene0032588	chr1	17595396	17610029
Unigene0032589	chr1	17595396	17610029
Unigene0032590	chr1	17595396	17610029
Unigene0032591	chr1	17595396	17610029
Unigene0032592	chr1	17595396	17610029
Unigene0032593	chr1	17595396	17610029
Unigene0032596	chr1	17595396	17610029
Unigene0032597	chr1	17595396	17601013
Unigene0032598	chr1	17595396	17610029
Unigene0032599	chr1	17595396	17610029
Unigene0032600	chr1	17595396	17610029
Unigene0032601	chr1	17595396	17610029
Unigene0032602	chr1	17595396	17610029
Unigene0032603	chr1	17595396	17610029
Unigene0032605	chr1	17595396	17610029
Unigene0032606	chr1	17595396	17610029
Unigene0032607	chr1	17595396	17610029
Unigene0032609	chr1	17595396	17610029
Unigene0032610	chr1	17595396	17610029
Unigene0032613	chr1	17595396	17610029
Unigene0032614	chr1	17595396	17610029
Unigene0032615	chr1	17595396	17610029
Unigene0032616	chr1	17595396	17610029
Unigene0032617	chr1	17595396	17601013
Unigene0032618	chr1	17595396	17601013
Unigene0032619	chr1	17595396	17610029
Unigene0032621	chr1	17595396	17610029
Unigene0032622	chr1	17595396	17610029
Unigene0032623	chr1	17595396	17610029
Unigene0032624	chr1	17595396	17601013
Unigene0032625	chr1	17595396	17610029
Unigene0032626	chr1	17595396	17610029
Unigene0032627	chr1	17595396	17610029
Unigene0032628	chr1	17595396	17610029
Unigene0084953	chr1	17595396	17610029
Unigene0084954	chr1	17595396	17610029
Unigene0032587	chr1	17602584	17610029
Unigene0032594	chr1	17602584	17610029
Unigene0032595	chr1	17602584	17610029
Unigene0032604	chr1	17602584	17610029
Unigene0032608	chr1	17602584	17610029
Unigene0032611	chr1	17602584	17610029
Unigene0032612	chr1	17602584	17610029
Unigene0032620	chr1	17602584	17610029
Unigene0068691	chr1	17606333	17606603
Unigene0004259	chr1	17614681	17620156
Unigene0004260	chr1	17614681	17620156
Unigene0084361	chr1	17635063	17638117
Unigene0084885	chr1	17635436	17638117
Unigene0028024	chr1	17644589	17646985
Unigene0002669	chr1	17648252	17649234
Unigene0038558	chr1	17673143	17680319
Unigene0012531	chr1	17712927	17721973
Unigene0008330	chr1	17728480	17730578
Unigene0003399	chr1	17757152	17759097
Unigene0003400	chr1	17757376	17759097
Unigene0081670	chr1	17998882	17999556
Unigene0042463	chr1	18050749	18053114
Unigene0030008	chr1	18055131	18060345
Unigene0086704	chr1	18055131	18060345
Unigene0018870	chr1	18075098	18077255
Unigene0050312	chr1	18097525	18101139
Unigene0043050	chr1	18111366	18111651
Unigene0043303	chr1	18157466	18159606
Unigene0004418	chr1	18207570	18208616
Unigene0004419	chr1	18207570	18208616
Unigene0007576	chr1	18209113	18216297
Unigene0005245	chr1	18216398	18223592
Unigene0005784	chr1	18242738	18246914
Unigene0003826	chr1	18249401	18252539
Unigene0003827	chr1	18249401	18252539
Unigene0017789	chr1	18258241	18263745
Unigene0017790	chr1	18258241	18269564
Unigene0017791	chr1	18258241	18269564
Unigene0017792	chr1	18258241	18269564
Unigene0017793	chr1	18258241	18269564
Unigene0017789	chr1	18287536	18293071
Unigene0017790	chr1	18287536	18298859
Unigene0017791	chr1	18287536	18298859
Unigene0017792	chr1	18287536	18298859
Unigene0017793	chr1	18287536	18298859
Unigene0021619	chr1	18339238	18357306
Unigene0021620	chr1	18339238	18357306
Unigene0021622	chr1	18339238	18357306
Unigene0021623	chr1	18339238	18357306
Unigene0021621	chr1	18343341	18357306
Unigene0082311	chr1	18350504	18357306
Unigene0007247	chr1	18359665	18365580
Unigene0035459	chr1	18403149	18410411
Unigene0035459	chr1	18431362	18438626
Unigene0004289	chr1	18456487	18461198
Unigene0005019	chr1	18463294	18465985
Unigene0005020	chr1	18463294	18465985
Unigene0011143	chr1	18467579	18474565
Unigene0011144	chr1	18467579	18474565
Unigene0007247	chr1	18507304	18513099
Unigene0021619	chr1	18515458	18533627
Unigene0021620	chr1	18515458	18533627
Unigene0021621	chr1	18515458	18529424
Unigene0021622	chr1	18515458	18533627
Unigene0021623	chr1	18515458	18533627
Unigene0082311	chr1	18515458	18522260
Unigene0055845	chr1	18565915	18566683
Unigene0072664	chr1	18571063	18571806
Unigene0012636	chr1	18649514	18651246
Unigene0012638	chr1	18649514	18651692
Unigene0011231	chr1	18654859	18656646
Unigene0011996	chr1	18843760	18845701
Unigene0081260	chr1	18894481	18894681
Unigene0084716	chr1	18986501	18988267
Unigene0044521	chr1	18993236	18998901
Unigene0042731	chr1	19074106	19078814
Unigene0014416	chr1	19140834	19141731
Unigene0045175	chr1	19163647	19164067
Unigene0018834	chr1	19268365	19276782
Unigene0044217	chr1	19317732	19328732
Unigene0016513	chr1	19354112	19357687
Unigene0061873	chr1	19354564	19354796
Unigene0046502	chr1	19357262	19359314
Unigene0079590	chr1	19358015	19358698
Unigene0045890	chr1	19362684	19364293
Unigene0012977	chr1	19365270	19368446
Unigene0012978	chr1	19365270	19368446
Unigene0046915	chr1	19365277	19365580
Unigene0046485	chr1	19366097	19366859
Unigene0046485	chr1	19415323	19416085
Unigene0021546	chr1	19430341	19431044
Unigene0061873	chr1	19449251	19449483
Unigene0040455	chr1	19833914	19837365
Unigene0040458	chr1	19837368	19844951
Unigene0076794	chr1	19847451	19848610
Unigene0073519	chr1	19849054	19849427
Unigene0079195	chr1	19850757	19850947
Unigene0043538	chr1	19852863	19861814
Unigene0073995	chr1	19857771	19858038
Unigene0005343	chr1	19915039	19915212
Unigene0005343	chr1	19940181	19940613
Unigene0004610	chr1	19941129	19941591
Unigene0061224	chr1	19947441	19947873
Unigene0043574	chr1	19964635	19973804
Unigene0018240	chr1	19981730	19985865
Unigene0084363	chr1	19988533	19992222
Unigene0046834	chr1	20002801	20005440
Unigene0041255	chr1	20017667	20022541
Unigene0016989	chr1	20043611	20051174
Unigene0038404	chr1	20084563	20086670
Unigene0038408	chr1	20085253	20086670
Unigene0038403	chr1	20086683	20093795
Unigene0042580	chr1	20120667	20125253
Unigene0042122	chr1	20159079	20162908
Unigene0086647	chr1	20197742	20201863
Unigene0015286	chr1	20258642	20285173
Unigene0044271	chr1	20301255	20312121
Unigene0051508	chr1	20312739	20313195
Unigene0053028	chr1	20313327	20313624
Unigene0081591	chr1	20329137	20332142
Unigene0048233	chr1	20332118	20333344
Unigene0046101	chr1	20339202	20341889
Unigene0033630	chr1	20353095	20353407
Unigene0058174	chr1	20353592	20353805
Unigene0012716	chr1	20356655	20362357
Unigene0051508	chr1	20394591	20395047
Unigene0053028	chr1	20395179	20395476
Unigene0014936	chr1	20414087	20417144
Unigene0086946	chr1	20414087	20417889
Unigene0036411	chr1	20417380	20418838
Unigene0036429	chr1	20417380	20418838
Unigene0036433	chr1	20417380	20418838
Unigene0036408	chr1	20421986	20430369
Unigene0036409	chr1	20421986	20430230
Unigene0036410	chr1	20421986	20430230
Unigene0036412	chr1	20421986	20430230
Unigene0036413	chr1	20421986	20430230
Unigene0036432	chr1	20421986	20430369
Unigene0082590	chr1	20421986	20430235
Unigene0082591	chr1	20421986	20430235
Unigene0082592	chr1	20421986	20430230
Unigene0082593	chr1	20421986	20430235
Unigene0082594	chr1	20421986	20430230
Unigene0082595	chr1	20421986	20430230
Unigene0082596	chr1	20421986	20430235
Unigene0082597	chr1	20421986	20430235
Unigene0082599	chr1	20421986	20430230
Unigene0082601	chr1	20421986	20430369
Unigene0082604	chr1	20421986	20429945
Unigene0082608	chr1	20421986	20430230
Unigene0082609	chr1	20421986	20430230
Unigene0082610	chr1	20421986	20430369
Unigene0082611	chr1	20421986	20430369
Unigene0082612	chr1	20421986	20430235
Unigene0082613	chr1	20421986	20430235
Unigene0082615	chr1	20421986	20430235
Unigene0082616	chr1	20421986	20430235
Unigene0082617	chr1	20421986	20429945
Unigene0082618	chr1	20421986	20430230
Unigene0082619	chr1	20421986	20430230
Unigene0082620	chr1	20421986	20430235
Unigene0082622	chr1	20421986	20430235
Unigene0082623	chr1	20421986	20430230
Unigene0082624	chr1	20421986	20430230
Unigene0082625	chr1	20421986	20430369
Unigene0082627	chr1	20421986	20430230
Unigene0082628	chr1	20421986	20430235
Unigene0082629	chr1	20421986	20430230
Unigene0082632	chr1	20421986	20430369
Unigene0082633	chr1	20421986	20430369
Unigene0082634	chr1	20421986	20430235
Unigene0082635	chr1	20421986	20430369
Unigene0082636	chr1	20421986	20430230
Unigene0082637	chr1	20421986	20430235
Unigene0082638	chr1	20421986	20429945
Unigene0082641	chr1	20421986	20430369
Unigene0082642	chr1	20421986	20430369
Unigene0082644	chr1	20421986	20429945
Unigene0082646	chr1	20421986	20430369
Unigene0082647	chr1	20421986	20430235
Unigene0082648	chr1	20421986	20430235
Unigene0082649	chr1	20421986	20430369
Unigene0036406	chr1	20421989	20422270
Unigene0046101	chr1	20435804	20441885
Unigene0048233	chr1	20450260	20451495
Unigene0043553	chr1	20668284	20670750
Unigene0009856	chr1	20689503	20693604
Unigene0009857	chr1	20689503	20693604
Unigene0009858	chr1	20691442	20693604
Unigene0009859	chr1	20691442	20693604
Unigene0047334	chr1	20702781	20704267
Unigene0042566	chr1	20714721	20720296
Unigene0082473	chr1	20740929	20743683
Unigene0007230	chr1	20821062	20827616
Unigene0013600	chr1	20828060	20828655
Unigene0013601	chr1	20828060	20828655
Unigene0061490	chr1	20870966	20871473
Unigene0043793	chr1	21058950	21061388
Unigene0047667	chr1	21101166	21109435
Unigene0026132	chr1	21160046	21164162
Unigene0026133	chr1	21160046	21164220
Unigene0026134	chr1	21160046	21164220
Unigene0026135	chr1	21160046	21164162
Unigene0026136	chr1	21160046	21164220
Unigene0026137	chr1	21160046	21164162
Unigene0026138	chr1	21160046	21164220
Unigene0026139	chr1	21160046	21164162
Unigene0026140	chr1	21160046	21164162
Unigene0026141	chr1	21160046	21164162
Unigene0026142	chr1	21160046	21164220
Unigene0026143	chr1	21160046	21164220
Unigene0026145	chr1	21160046	21164220
Unigene0026146	chr1	21160046	21164162
Unigene0026147	chr1	21160046	21164220
Unigene0026148	chr1	21160046	21164162
Unigene0043947	chr1	21189186	21190163
Unigene0005246	chr1	21261292	21265035
Unigene0004026	chr1	21312942	21313845
Unigene0038309	chr1	21329725	21329865
Unigene0084086	chr1	21338247	21340434
Unigene0025578	chr1	21339901	21340434
Unigene0007059	chr1	21340981	21344653
Unigene0084513	chr1	21344961	21345837
Unigene0043428	chr1	21364602	21370573
Unigene0044036	chr1	21398602	21407281
Unigene0067508	chr1	21406219	21406488
Unigene0016213	chr1	21445734	21457042
Unigene0016214	chr1	21445734	21457042
Unigene0016215	chr1	21445734	21457042
Unigene0016216	chr1	21445734	21457042
Unigene0048454	chr1	21500982	21502283
Unigene0047471	chr1	21504153	21504886
Unigene0019577	chr1	21505172	21515023
Unigene0019578	chr1	21506862	21515023
Unigene0011613	chr1	21516360	21523858
Unigene0019857	chr1	21555877	21563046
Unigene0019858	chr1	21555877	21563046
Unigene0019859	chr1	21555877	21557251
Unigene0019860	chr1	21555877	21563046
Unigene0010768	chr1	21564583	21568900
Unigene0010769	chr1	21564583	21568900
Unigene0041876	chr1	21593035	21597215
Unigene0044352	chr1	21625376	21629502
Unigene0027959	chr1	21631810	21634858
Unigene0027961	chr1	21631810	21636594
Unigene0027962	chr1	21631810	21636594
Unigene0027965	chr1	21631810	21636594
Unigene0027968	chr1	21631810	21634858
Unigene0027958	chr1	21632516	21636594
Unigene0027964	chr1	21632686	21636594
Unigene0027967	chr1	21634334	21636594
Unigene0044607	chr1	21654144	21657043
Unigene0060800	chr1	21678003	21678697
Unigene0081669	chr1	21715356	21726255
Unigene0081701	chr1	21715356	21726255
Unigene0085291	chr1	21715356	21726255
Unigene0086716	chr1	21715356	21726255
Unigene0032818	chr1	21761882	21766025
Unigene0032819	chr1	21761882	21766025
Unigene0032820	chr1	21766704	21771623
Unigene0043114	chr1	21775586	21779513
Unigene0046047	chr1	21783346	21786593
Unigene0007565	chr1	21789849	21791121
Unigene0019365	chr1	21790150	21793521
Unigene0004176	chr1	21806673	21809680
Unigene0057728	chr1	21807992	21808273
Unigene0045773	chr1	21808291	21808684
Unigene0006998	chr1	21811781	21817138
Unigene0042705	chr1	21821930	21824318
Unigene0081961	chr1	21831292	21838053
Unigene0009223	chr1	21835548	21838053
Unigene0050269	chr1	21841822	21847535
Unigene0044646	chr1	21865162	21866696
Unigene0026621	chr1	21884082	21894663
Unigene0035376	chr1	21927739	21930780
Unigene0006849	chr1	21968508	21979802
Unigene0026176	chr1	22002767	22003031
Unigene0000697	chr1	22168447	22170168
Unigene0000698	chr1	22168447	22170168
Unigene0012998	chr1	22184627	22187243
Unigene0042525	chr1	22189633	22192556
Unigene0066928	chr1	22218490	22218986
Unigene0066928	chr1	22230173	22230669
Unigene0044516	chr1	22243040	22246526
Unigene0085630	chr1	22252325	22255171
Unigene0041182	chr1	22260497	22264847
Unigene0013526	chr1	22340413	22340521
Unigene0010493	chr1	22370212	22370414
Unigene0013526	chr1	22370358	22370466
Unigene0046550	chr1	22400344	22402040
Unigene0000253	chr1	22421559	22421899
Unigene0000254	chr1	22421718	22421899
Unigene0073912	chr1	22422574	22422766
Unigene0012367	chr1	22429068	22433143
Unigene0008305	chr1	22440065	22443566
Unigene0008306	chr1	22440065	22443566
Unigene0013756	chr1	22459856	22467279
Unigene0013757	chr1	22459856	22467018
Unigene0042769	chr1	22472997	22477606
Unigene0004834	chr1	22480382	22485600
Unigene0004835	chr1	22480382	22485600
Unigene0083291	chr1	22531316	22539796
Unigene0032212	chr1	22533369	22539796
Unigene0032211	chr1	22533529	22539796
Unigene0045151	chr1	22537947	22539125
Unigene0018502	chr1	22825768	22829713
Unigene0018504	chr1	22825768	22829713
Unigene0018505	chr1	22825768	22829713
Unigene0043367	chr1	22831206	22833427
Unigene0007093	chr1	22838580	22838956
Unigene0007094	chr1	22838580	22838956
Unigene0012026	chr1	22845183	22857490
Unigene0012027	chr1	22845183	22857490
Unigene0083447	chr1	22874653	22877350
Unigene0001620	chr1	22877369	22880410
Unigene0083447	chr1	22891794	22893346
Unigene0043930	chr1	22925473	22928063
Unigene0042737	chr1	22943666	22947385
Unigene0055432	chr1	22956062	22956263
Unigene0077817	chr1	22959722	22960101
Unigene0043369	chr1	22961234	22962246
Unigene0043102	chr1	22962586	22963220
Unigene0042645	chr1	22963633	22964303
Unigene0047283	chr1	22992790	22994235
Unigene0002307	chr1	22994312	22995801
Unigene0046260	chr1	23001743	23004541
Unigene0003144	chr1	23002780	23003837
Unigene0045563	chr1	23004525	23005814
Unigene0044936	chr1	23005800	23006785
Unigene0004277	chr1	23045226	23046010
Unigene0038370	chr1	23046614	23047612
Unigene0041510	chr1	23046655	23047210
Unigene0017322	chr1	23129336	23134211
Unigene0083008	chr1	23129336	23134211
Unigene0078127	chr1	23144946	23145125
Unigene0018199	chr1	23242391	23247174
Unigene0018200	chr1	23242391	23247174
Unigene0085909	chr1	23242391	23247174
Unigene0085992	chr1	23242391	23247174
Unigene0041585	chr1	23269001	23273678
Unigene0020551	chr1	23285062	23294513
Unigene0020549	chr1	23293035	23294513
Unigene0010196	chr1	23322248	23330097
Unigene0044368	chr1	23343898	23352152
Unigene0015158	chr1	23358546	23375259
Unigene0015159	chr1	23358546	23375259
Unigene0020509	chr1	23481397	23485664
Unigene0064373	chr1	23493308	23493661
Unigene0045541	chr1	23512126	23514713
Unigene0079588	chr1	23516231	23516382
Unigene0004950	chr1	23535531	23544444
Unigene0004951	chr1	23535531	23544444
Unigene0078962	chr1	23538742	23539349
Unigene0034638	chr1	23566395	23570321
Unigene0079588	chr1	23609720	23609871
Unigene0045541	chr1	23611389	23613976
Unigene0020259	chr1	23659397	23663827
Unigene0020260	chr1	23659397	23663827
Unigene0020261	chr1	23659397	23663827
Unigene0082067	chr1	23665428	23669289
Unigene0083634	chr1	23665428	23669289
Unigene0084918	chr1	23665428	23669289
Unigene0087119	chr1	23665428	23669289
Unigene0039304	chr1	23668587	23669289
Unigene0039314	chr1	23668838	23669289
Unigene0007140	chr1	23684829	23689893
Unigene0013091	chr1	23737828	23740437
Unigene0034095	chr1	23743249	23749871
Unigene0016790	chr1	23751957	23753036
Unigene0016791	chr1	23751957	23754005
Unigene0016791	chr1	23820543	23822591
Unigene0021874	chr1	23861561	23866431
Unigene0051547	chr1	23863007	23863405
Unigene0012541	chr1	23863643	23864222
Unigene0050103	chr1	23865659	23866516
Unigene0041434	chr1	23882047	23884453
Unigene0048032	chr1	23966423	23974095
Unigene0006138	chr1	23987030	23994523
Unigene0048833	chr1	24000851	24006296
Unigene0004633	chr1	24069190	24077743
Unigene0034234	chr1	24092464	24093850
Unigene0046152	chr1	24111520	24115843
Unigene0045577	chr1	24120578	24127844
Unigene0042540	chr1	24137009	24138459
Unigene0083283	chr1	24143604	24149640
Unigene0086788	chr1	24148817	24149640
Unigene0028131	chr1	24149771	24150112
Unigene0036079	chr1	24152919	24156938
Unigene0036074	chr1	24157099	24157489
Unigene0036075	chr1	24157099	24157726
Unigene0044805	chr1	24173385	24175021
Unigene0036074	chr1	24176227	24176800
Unigene0036075	chr1	24176227	24176964
Unigene0036080	chr1	24176227	24182329
Unigene0001435	chr1	24196105	24196674
Unigene0069063	chr1	24196867	24197183
Unigene0001970	chr1	24197174	24197559
Unigene0066241	chr1	24197551	24197970
Unigene0053510	chr1	24199350	24200288
Unigene0054389	chr1	24200412	24200951
Unigene0020434	chr1	24200964	24201450
Unigene0020433	chr1	24201133	24201450
Unigene0074612	chr1	24201510	24201808
Unigene0079286	chr1	24210393	24210604
Unigene0073889	chr1	24210648	24210791
Unigene0006552	chr1	24449201	24513854
Unigene0022272	chr1	24464104	24468449
Unigene0022273	chr1	24464104	24468449
Unigene0006552	chr1	24503422	24539264
Unigene0011555	chr1	24543526	24545050
Unigene0083889	chr1	24625828	24647671
Unigene0002107	chr1	24655710	24659643
Unigene0002108	chr1	24655710	24659643
Unigene0010105	chr1	24675860	24677135
Unigene0082582	chr1	24675860	24680834
Unigene0041563	chr1	24752634	24755276
Unigene0006902	chr1	24801277	24813946
Unigene0025924	chr1	24820049	24825936
Unigene0042802	chr1	24820792	24821295
Unigene0025924	chr1	24831924	24836233
Unigene0042802	chr1	24832649	24833153
Unigene0080753	chr1	24839411	24839622
Unigene0031673	chr1	24851795	24852124
Unigene0010441	chr1	24901421	24908948
Unigene0010442	chr1	24901421	24908948
Unigene0010443	chr1	24901421	24908948
Unigene0010444	chr1	24901421	24908948
Unigene0046634	chr1	24910432	24915922
Unigene0070531	chr1	24919717	24920033
Unigene0061684	chr1	24920172	24920444
Unigene0064416	chr1	24921967	24922577
Unigene0078129	chr1	24922582	24922810
Unigene0068780	chr1	24922822	24923108
Unigene0083727	chr1	24923770	24926611
Unigene0009291	chr1	24926459	24926611
Unigene0012510	chr1	24927139	24929116
Unigene0012511	chr1	24927139	24929116
Unigene0043094	chr1	24983083	24986947
Unigene0064641	chr1	24997942	24998217
Unigene0011606	chr1	25005453	25006481
Unigene0011550	chr1	25020146	25028430
Unigene0048973	chr1	25041227	25044374
Unigene0075374	chr1	25044146	25044486
Unigene0002844	chr1	25707847	25708635
Unigene0002845	chr1	25707847	25708635
Unigene0020029	chr1	25716377	25719697
Unigene0020030	chr1	25716377	25719697
Unigene0020031	chr1	25717159	25719697
Unigene0019658	chr1	25966709	25968945
Unigene0019659	chr1	25966709	25968945
Unigene0004296	chr1	25989249	25994804
Unigene0004297	chr1	25989249	25994804
Unigene0003685	chr1	26001432	26007486
Unigene0042584	chr1	26057599	26058757
Unigene0004400	chr1	26058735	26060725
Unigene0047968	chr1	26193232	26195148
Unigene0048093	chr1	26195272	26196247
Unigene0047442	chr1	26226071	26231247
Unigene0005096	chr1	26248036	26248660
Unigene0004400	chr1	26291514	26293315
Unigene0042584	chr1	26293482	26294640
Unigene0003685	chr1	26344753	26350488
Unigene0009648	chr1	26456305	26463202
Unigene0046324	chr1	26475930	26478191
Unigene0019826	chr1	26491907	26494549
Unigene0003950	chr1	26529830	26536778
Unigene0006721	chr1	26817751	26821264
Unigene0006722	chr1	26818085	26821264
Unigene0045268	chr1	26821248	26822459
Unigene0047151	chr1	26824652	26824928
Unigene0013999	chr1	26824902	26831351
Unigene0014000	chr1	26824902	26831351
Unigene0014001	chr1	26824902	26831351
Unigene0014002	chr1	26824902	26831351
Unigene0026544	chr1	26837698	26843098
Unigene0086074	chr1	26837698	26843098
Unigene0034589	chr1	26848975	26856681
Unigene0034594	chr1	26848975	26856681
Unigene0034595	chr1	26848975	26856681
Unigene0034597	chr1	26848975	26856681
Unigene0043482	chr1	26865039	26869251
Unigene0073940	chr1	26897194	26897387
Unigene0001771	chr1	26931123	26935993
Unigene0001772	chr1	26934062	26935993
Unigene0040091	chr1	26952850	26954670
Unigene0040093	chr1	26952850	26953406
Unigene0040092	chr1	26952862	26954670
Unigene0048000	chr1	26956141	26959194
Unigene0068625	chr1	26960736	26961486
Unigene0077326	chr1	26961670	26961887
Unigene0079723	chr1	26961892	26962105
Unigene0041316	chr1	26969284	26974011
Unigene0052294	chr1	27010553	27010820
Unigene0056164	chr1	27012688	27013045
Unigene0056074	chr1	27029089	27029612
Unigene0055441	chr1	27029590	27030101
Unigene0051913	chr1	27030082	27031184
Unigene0004706	chr1	27046243	27056875
Unigene0004707	chr1	27046243	27056875
Unigene0060452	chr1	27046750	27047357
Unigene0009749	chr1	27063269	27065501
Unigene0009751	chr1	27063269	27066104
Unigene0009748	chr1	27064944	27065501
Unigene0009750	chr1	27064944	27066104
Unigene0006064	chr1	27070220	27078914
Unigene0006065	chr1	27070220	27078914
Unigene0000224	chr1	27184457	27184666
Unigene0026475	chr1	27212805	27295182
Unigene0026476	chr1	27212805	27295182
Unigene0026477	chr1	27212805	27295182
Unigene0026478	chr1	27212805	27295182
Unigene0084094	chr1	27212805	27295182
Unigene0085444	chr1	27212805	27295182
Unigene0086043	chr1	27212805	27295182
Unigene0086324	chr1	27212805	27295182
Unigene0086446	chr1	27334412	27344681
Unigene0086447	chr1	27334412	27344681
Unigene0086448	chr1	27334412	27344681
Unigene0086449	chr1	27334412	27344681
Unigene0043768	chr1	27346732	27349844
Unigene0006010	chr1	27365007	27366847
Unigene0006011	chr1	27365007	27366847
Unigene0033100	chr1	27377706	27378211
Unigene0033101	chr1	27378428	27379329
Unigene0033106	chr1	27378428	27378934
Unigene0007375	chr1	27378450	27378669
Unigene0014258	chr1	27401175	27406782
Unigene0035257	chr1	27430038	27438159
Unigene0035264	chr1	27430038	27438159
Unigene0037820	chr1	27441163	27441427
Unigene0034264	chr1	27441728	27442964
Unigene0041526	chr1	27446997	27449840
Unigene0003191	chr1	27501389	27508440
Unigene0044665	chr1	27519317	27521384
Unigene0050866	chr1	27535098	27536883
Unigene0042418	chr1	27614708	27617029
Unigene0042418	chr1	27699516	27701884
Unigene0042418	chr1	27708210	27712331
Unigene0060678	chr1	27981105	27984331
Unigene0072076	chr1	27984037	27984557
Unigene0077436	chr1	27984683	27985300
Unigene0005312	chr1	28004327	28009569
Unigene0060678	chr1	28069683	28072909
Unigene0072076	chr1	28072615	28073135
Unigene0077436	chr1	28073261	28073878
Unigene0005312	chr1	28092898	28098141
Unigene0031115	chr1	28114002	28117212
Unigene0031114	chr1	28115204	28117212
Unigene0022347	chr1	28118773	28119270
Unigene0022347	chr1	28145710	28146401
Unigene0022348	chr1	28145904	28146401
Unigene0042125	chr1	28147361	28147634
Unigene0043336	chr1	28150709	28153928
Unigene0006704	chr1	28164502	28170283
Unigene0006705	chr1	28164502	28170283
Unigene0034386	chr1	28175112	28177508
Unigene0059005	chr1	28188457	28189972
Unigene0046888	chr1	28191492	28192099
Unigene0045335	chr1	28233580	28237869
Unigene0075147	chr1	28270561	28270774
Unigene0086777	chr1	28270755	28271306
Unigene0070202	chr1	28272461	28272793
Unigene0042875	chr1	28297779	28302650
Unigene0062135	chr1	28300749	28300974
Unigene0052478	chr1	28302032	28302372
Unigene0036434	chr1	28305933	28309022
Unigene0042923	chr1	28331524	28333204
Unigene0004073	chr1	28355876	28363721
Unigene0004074	chr1	28355876	28363721
Unigene0075691	chr1	28360865	28361291
Unigene0041172	chr1	28366662	28368488
Unigene0063821	chr1	28392255	28393066
Unigene0024649	chr1	28527378	28534698
Unigene0006107	chr1	28563585	28571587
Unigene0081919	chr1	28632914	28646122
Unigene0082584	chr1	28632914	28646122
Unigene0082860	chr1	28632914	28646122
Unigene0082912	chr1	28632914	28646122
Unigene0084934	chr1	28632914	28646122
Unigene0085550	chr1	28632914	28646122
Unigene0086351	chr1	28632914	28646122
Unigene0087118	chr1	28632914	28646122
Unigene0028742	chr1	28636829	28646122
Unigene0028744	chr1	28636829	28646122
Unigene0028746	chr1	28636829	28641635
Unigene0028747	chr1	28636829	28641635
Unigene0083728	chr1	28636966	28646122
Unigene0086321	chr1	28636966	28646122
Unigene0023816	chr1	28707215	28718461
Unigene0023817	chr1	28707215	28718461
Unigene0026823	chr1	28753438	28756313
Unigene0022393	chr1	28754029	28754303
Unigene0036786	chr1	28754282	28754721
Unigene0008838	chr1	28757141	28757292
Unigene0012659	chr1	28757450	28757988
Unigene0012659	chr1	28774705	28775467
Unigene0035807	chr1	28790579	28791967
Unigene0035805	chr1	28791327	28791967
Unigene0044623	chr1	28791945	28794433
Unigene0084212	chr1	28804901	28808986
Unigene0028027	chr1	28811226	28816212
Unigene0028028	chr1	28811226	28816212
Unigene0028029	chr1	28811226	28815786
Unigene0028030	chr1	28811226	28817857
Unigene0028031	chr1	28811226	28817857
Unigene0028032	chr1	28811226	28815786
Unigene0086566	chr1	28811226	28817857
Unigene0086572	chr1	28811226	28817857
Unigene0085234	chr1	28818271	28820719
Unigene0058683	chr1	28820702	28822079
Unigene0014410	chr1	28837463	28841423
Unigene0084476	chr1	28837463	28841423
Unigene0023590	chr1	28867830	28876719
Unigene0023590	chr1	28867979	28868281
Unigene0051724	chr1	28885128	28886381
Unigene0045464	chr1	28913931	28916125
Unigene0049524	chr1	28920193	28921781
Unigene0002586	chr1	28922332	28923391
Unigene0050567	chr1	28923369	28923951
Unigene0051021	chr1	28923933	28924723
Unigene0074889	chr1	28931279	28931898
Unigene0051766	chr1	28939957	28940645
Unigene0051724	chr1	28967966	28969219
Unigene0039293	chr1	28994690	28994952
Unigene0039296	chr1	28995158	28995445
Unigene0039296	chr1	29000443	29000872
Unigene0002264	chr1	29026407	29026781
Unigene0002264	chr1	29034024	29034424
Unigene0002264	chr1	29037129	29037530
Unigene0049524	chr1	29045815	29047403
Unigene0002586	chr1	29047954	29049013
Unigene0050567	chr1	29048991	29049573
Unigene0051021	chr1	29049555	29050345
Unigene0074889	chr1	29056901	29057520
Unigene0045464	chr1	29061311	29063505
Unigene0051766	chr1	29083330	29084103
Unigene0002264	chr1	29094291	29094691
Unigene0002264	chr1	29097396	29097815
Unigene0002264	chr1	29101721	29102100
Unigene0056199	chr1	29116630	29117801
Unigene0054190	chr1	29117815	29118550
Unigene0048272	chr1	29122943	29125555
Unigene0048665	chr1	29125533	29125755
Unigene0069734	chr1	29127650	29130827
Unigene0069734	chr1	29144275	29148036
Unigene0047143	chr1	29162843	29166713
Unigene0046050	chr1	29176893	29183377
Unigene0032663	chr1	29194632	29195854
Unigene0032665	chr1	29194632	29195854
Unigene0032666	chr1	29194632	29195885
Unigene0032667	chr1	29194632	29196866
Unigene0037857	chr1	29201369	29207461
Unigene0037859	chr1	29201369	29208518
Unigene0037859	chr1	29248596	29255658
Unigene0037857	chr1	29249566	29255658
Unigene0032667	chr1	29260161	29262395
Unigene0032666	chr1	29261142	29262395
Unigene0032663	chr1	29261173	29262395
Unigene0032665	chr1	29261173	29262395
Unigene0046050	chr1	29273650	29280134
Unigene0047143	chr1	29290314	29292876
Unigene0016009	chr1	29303006	29310918
Unigene0016011	chr1	29303006	29310693
Unigene0016012	chr1	29303006	29310693
Unigene0032714	chr1	29318752	29319447
Unigene0013744	chr1	29342461	29345817
Unigene0013745	chr1	29342461	29345817
Unigene0013746	chr1	29342461	29345401
Unigene0013747	chr1	29342461	29345401
Unigene0013748	chr1	29342461	29345817
Unigene0015542	chr1	29349585	29351412
Unigene0015543	chr1	29349585	29351262
Unigene0015544	chr1	29349585	29351412
Unigene0044173	chr1	29393506	29397678
Unigene0045149	chr1	29397658	29398548
Unigene0016009	chr1	29454418	29463734
Unigene0016011	chr1	29454418	29463734
Unigene0016012	chr1	29454418	29463734
Unigene0007829	chr1	29551026	29552819
Unigene0007830	chr1	29551026	29552692
Unigene0047354	chr1	29590640	29592341
Unigene0047581	chr1	29593236	29595068
Unigene0081913	chr1	29595769	29601687
Unigene0081969	chr1	29595769	29601687
Unigene0084213	chr1	29595769	29601687
Unigene0084272	chr1	29595769	29601584
Unigene0084825	chr1	29595769	29601584
Unigene0085537	chr1	29595769	29601584
Unigene0087019	chr1	29595769	29601584
Unigene0087023	chr1	29595769	29601687
Unigene0015629	chr1	29601575	29605856
Unigene0015631	chr1	29601575	29605856
Unigene0009485	chr1	29647851	29648357
Unigene0041841	chr1	29648361	29650477
Unigene0082575	chr1	29976748	29979113
Unigene0084946	chr1	29976748	29979113
Unigene0081615	chr1	30033637	30037096
Unigene0013071	chr1	30131391	30133529
Unigene0015990	chr1	30146059	30148213
Unigene0086734	chr1	30146059	30148288
Unigene0044575	chr1	30198899	30202342
Unigene0045213	chr1	30203515	30206007
Unigene0010106	chr1	30211148	30214002
Unigene0050502	chr1	30224020	30224781
Unigene0004086	chr1	30232071	30238454
Unigene0014572	chr1	30241385	30246861
Unigene0045190	chr1	30328518	30329186
Unigene0048121	chr1	30472142	30473982
Unigene0082528	chr1	30681610	30693575
Unigene0015805	chr1	30780434	30785013
Unigene0020402	chr1	30796486	30802631
Unigene0020403	chr1	30797397	30802631
Unigene0043576	chr1	30847146	30860462
Unigene0058836	chr1	30847967	30848244
Unigene0062440	chr1	30868900	30869037
Unigene0043171	chr1	30885388	30887318
Unigene0018616	chr1	30905576	30906497
Unigene0018618	chr1	30905576	30906064
Unigene0004237	chr1	30909784	30913052
Unigene0004238	chr1	30909784	30913052
Unigene0051052	chr1	30916561	30917321
Unigene0049075	chr1	30961154	30962127
Unigene0071105	chr1	30970684	30970892
Unigene0003607	chr1	30971423	30971727
Unigene0003606	chr1	30971705	30973276
Unigene0052045	chr1	30973317	30973694
Unigene0002784	chr1	30974558	30978453
Unigene0007851	chr1	31001134	31007248
Unigene0007852	chr1	31001134	31007248
Unigene0027725	chr1	31038144	31045570
Unigene0027729	chr1	31038144	31045570
Unigene0027730	chr1	31038144	31045570
Unigene0027731	chr1	31038144	31045570
Unigene0081645	chr1	31038144	31045570
Unigene0081656	chr1	31038144	31045570
Unigene0081668	chr1	31038144	31045570
Unigene0081672	chr1	31038144	31045570
Unigene0048214	chr1	31082539	31085088
Unigene0071895	chr1	31083706	31084220
Unigene0047724	chr1	31085065	31095143
Unigene0017769	chr1	31109070	31109756
Unigene0033913	chr1	31120824	31122210
Unigene0033917	chr1	31122028	31122410
Unigene0033920	chr1	31122436	31125566
Unigene0043734	chr1	31317704	31323122
Unigene0070676	chr1	31328162	31328316
Unigene0070676	chr1	31410273	31410427
Unigene0046305	chr1	31491327	31494960
Unigene0017895	chr1	31512694	31518910
Unigene0017896	chr1	31512694	31519329
Unigene0040009	chr1	31542640	31543853
Unigene0058795	chr1	31543842	31544359
Unigene0063355	chr1	31545095	31545282
Unigene0076419	chr1	31593188	31593420
Unigene0070676	chr1	31629580	31629734
Unigene0043734	chr1	31634774	31640192
Unigene0036750	chr1	31813314	31813973
Unigene0036753	chr1	31813314	31813985
Unigene0086720	chr1	31813314	31817285
Unigene0008910	chr1	31820826	31823972
Unigene0004094	chr1	31838688	31844805
Unigene0004095	chr1	31838688	31844805
Unigene0046041	chr1	31845676	31848244
Unigene0010599	chr1	31950426	31954061
Unigene0010600	chr1	31950426	31954061
Unigene0024029	chr1	31962628	31968042
Unigene0024024	chr1	31964270	31968042
Unigene0046666	chr1	31985052	31991754
Unigene0073304	chr1	31987905	31988127
Unigene0043683	chr1	31997787	32011098
Unigene0037506	chr1	32001952	32002288
Unigene0034577	chr1	32004071	32004361
Unigene0040812	chr1	32036060	32041041
Unigene0028919	chr1	32074439	32075703
Unigene0037216	chr1	32099350	32099556
Unigene0058839	chr1	32099571	32099726
Unigene0086118	chr1	32099974	32100286
Unigene0000914	chr1	32364367	32364729
Unigene0014254	chr1	32365458	32365735
Unigene0046150	chr1	32367624	32372342
Unigene0037218	chr1	32389812	32402533
Unigene0077427	chr1	32409549	32409814
Unigene0058839	chr1	32417350	32417538
Unigene0037216	chr1	32422044	32422241
Unigene0058839	chr1	32422248	32422444
Unigene0013117	chr1	32438516	32442662
Unigene0013116	chr1	32439333	32442662
Unigene0013118	chr1	32439333	32442662
Unigene0058839	chr1	32444963	32445143
Unigene0058839	chr1	32448596	32448748
Unigene0070291	chr1	32462407	32462775
Unigene0057973	chr1	32462754	32463478
Unigene0081250	chr1	32469799	32469992
Unigene0027640	chr1	32477049	32486273
Unigene0027642	chr1	32477049	32486273
Unigene0027643	chr1	32477049	32486273
Unigene0027646	chr1	32477049	32486273
Unigene0027649	chr1	32477049	32486273
Unigene0027650	chr1	32477049	32486273
Unigene0027653	chr1	32477049	32486273
Unigene0027656	chr1	32477049	32486273
Unigene0027659	chr1	32477049	32486273
Unigene0043712	chr1	32488145	32493517
Unigene0004191	chr1	32558865	32570954
Unigene0067457	chr1	32582306	32583569
Unigene0083980	chr1	32592766	32598510
Unigene0022325	chr1	32592795	32598510
Unigene0022326	chr1	32592795	32598510
Unigene0083321	chr1	32592795	32598510
Unigene0022327	chr1	32592986	32598510
Unigene0084015	chr1	32592986	32598510
Unigene0003263	chr1	32617711	32621491
Unigene0007438	chr1	32671672	32676002
Unigene0035246	chr1	32828971	32832368
Unigene0035248	chr1	32828971	32832142
Unigene0035238	chr1	32829102	32832368
Unigene0035247	chr1	32829102	32832142
Unigene0035251	chr1	32829102	32832142
Unigene0035237	chr1	32831479	32832142
Unigene0035241	chr1	32831479	32835698
Unigene0035245	chr1	32831479	32832368
Unigene0035253	chr1	32831479	32832142
Unigene0084403	chr1	32831479	32835698
Unigene0035240	chr1	32832463	32835473
Unigene0014517	chr1	32879717	32882820
Unigene0014519	chr1	32880426	32882820
Unigene0023647	chr1	32883512	32884828
Unigene0023646	chr1	32884694	32886081
Unigene0012946	chr1	32886058	32892400
Unigene0085375	chr1	32942821	32951087
Unigene0012643	chr1	32967016	32969922
Unigene0012644	chr1	32967135	32969922
Unigene0050385	chr1	32991357	33016662
Unigene0003770	chr1	33048411	33053129
Unigene0019525	chr1	33072171	33074802
Unigene0019526	chr1	33072171	33077249
Unigene0005449	chr1	33086793	33091284
Unigene0005450	chr1	33086793	33091284
Unigene0041509	chr1	33096692	33104986
Unigene0023313	chr1	33107034	33111523
Unigene0023314	chr1	33107034	33111523
Unigene0083389	chr1	33107034	33111523
Unigene0085273	chr1	33107034	33111523
Unigene0046134	chr1	33117314	33122282
Unigene0016097	chr1	33125463	33125681
Unigene0044227	chr1	33148282	33150497
Unigene0018839	chr1	33201467	33207345
Unigene0018840	chr1	33201467	33207443
Unigene0018841	chr1	33201467	33207347
Unigene0018842	chr1	33201467	33207345
Unigene0018843	chr1	33201467	33207347
Unigene0043252	chr1	33216515	33223558
Unigene0044378	chr1	33228486	33234567
Unigene0038141	chr1	33242252	33243840
Unigene0038153	chr1	33242252	33243839
Unigene0038142	chr1	33244000	33247589
Unigene0038151	chr1	33248901	33251573
Unigene0085304	chr1	33248901	33251573
Unigene0046444	chr1	33255112	33257808
Unigene0056986	chr1	33326284	33326544
Unigene0037727	chr1	33523770	33524432
Unigene0003392	chr1	33587154	33592823
Unigene0003393	chr1	33587154	33592823
Unigene0037727	chr1	33611099	33611761
Unigene0033759	chr1	33625655	33629108
Unigene0043522	chr1	33658559	33663729
Unigene0043423	chr1	33665751	33669769
Unigene0018319	chr1	33682309	33685423
Unigene0018321	chr1	33682309	33685423
Unigene0004921	chr1	33696221	33700102
Unigene0059057	chr1	33696974	33697362
Unigene0041999	chr1	33702063	33706040
Unigene0039944	chr1	33710979	33715307
Unigene0017267	chr1	33745270	33750643
Unigene0042292	chr1	33758976	33762146
Unigene0014387	chr1	33766791	33767836
Unigene0014388	chr1	33767256	33767836
Unigene0046001	chr1	33768741	33769977
Unigene0004447	chr1	33781759	33789558
Unigene0016112	chr1	33791026	33794022
Unigene0016113	chr1	33791026	33794022
Unigene0032759	chr1	33810428	33816991
Unigene0033297	chr1	33817152	33825773
Unigene0046872	chr1	33825892	33826186
Unigene0047026	chr1	33826163	33826762
Unigene0046801	chr1	33826766	33827257
Unigene0045539	chr1	33831718	33832577
Unigene0045118	chr1	33832561	33832817
Unigene0044599	chr1	33832861	33833745
Unigene0044593	chr1	33833729	33834489
Unigene0048006	chr1	33836431	33837498
Unigene0001561	chr1	33870278	33870517
Unigene0019411	chr1	33885987	33900979
Unigene0042882	chr1	33907220	33914922
Unigene0042209	chr1	33922559	33927573
Unigene0015887	chr1	33929748	33934172
Unigene0015888	chr1	33930835	33934172
Unigene0015889	chr1	33930835	33934172
Unigene0087073	chr1	33935946	33938516
Unigene0003794	chr1	33948226	33953475
Unigene0003795	chr1	33948226	33953475
Unigene0031129	chr1	34032891	34035898
Unigene0013328	chr1	34043163	34046000
Unigene0013329	chr1	34043163	34046000
Unigene0013330	chr1	34043163	34046000
Unigene0013331	chr1	34043163	34046000
Unigene0051028	chr1	34075820	34076432
Unigene0043882	chr1	34078174	34086906
Unigene0042895	chr1	34111804	34113258
Unigene0030746	chr1	34112592	34113244
Unigene0036819	chr1	34122656	34139178
Unigene0045380	chr1	34126047	34136175

## Sheet: 2
Unigene0017239	chr2	22467	24529
Unigene0085418	chr2	41402	51382
Unigene0004997	chr2	94266	103823
Unigene0004206	chr2	107745	109372
Unigene0085514	chr2	124010	126352
Unigene0010070	chr2	131472	134985
Unigene0050659	chr2	153224	153984
Unigene0082440	chr2	220492	223400
Unigene0015759	chr2	225436	230544
Unigene0015760	chr2	225436	230544
Unigene0015761	chr2	225436	230544
Unigene0015762	chr2	225436	230544
Unigene0055292	chr2	227062	227535
Unigene0020327	chr2	232949	237331
Unigene0045148	chr2	233599	233919
Unigene0004153	chr2	241465	247599
Unigene0045909	chr2	286163	291814
Unigene0070703	chr2	286747	287123
Unigene0014375	chr2	292469	293850
Unigene0014376	chr2	292469	293850
Unigene0010832	chr2	333325	337660
Unigene0010833	chr2	333325	335397
Unigene0010834	chr2	333325	337660
Unigene0021150	chr2	338839	341004
Unigene0082483	chr2	364351	369780
Unigene0084828	chr2	364351	369780
Unigene0041319	chr2	392467	395363
Unigene0008888	chr2	419965	426208
Unigene0016840	chr2	423907	424268
Unigene0012152	chr2	437277	443754
Unigene0012153	chr2	437277	443754
Unigene0012154	chr2	437277	443754
Unigene0012155	chr2	437277	443754
Unigene0012156	chr2	437277	443754
Unigene0012157	chr2	437277	443754
Unigene0011074	chr2	446906	453937
Unigene0011075	chr2	446906	453937
Unigene0011076	chr2	446906	453937
Unigene0011077	chr2	446906	453937
Unigene0045566	chr2	470860	475008
Unigene0043439	chr2	482630	486547
Unigene0025882	chr2	523873	530535
Unigene0059555	chr2	524440	524640
Unigene0022818	chr2	539843	542833
Unigene0022819	chr2	539843	542833
Unigene0009704	chr2	543987	548366
Unigene0009705	chr2	543987	548236
Unigene0081630	chr2	577171	584051
Unigene0085999	chr2	577171	584051
Unigene0043640	chr2	586364	627782
Unigene0043640	chr2	586401	591020
Unigene0045566	chr2	654059	658314
Unigene0043439	chr2	665836	669752
Unigene0038321	chr2	701094	709632
Unigene0038322	chr2	701094	709632
Unigene0043375	chr2	721279	726392
Unigene0033762	chr2	728374	728814
Unigene0033762	chr2	751126	751913
Unigene0041425	chr2	756308	759815
Unigene0072412	chr2	776874	777163
Unigene0074337	chr2	777151	777876
Unigene0005746	chr2	791990	798628
Unigene0038321	chr2	810630	819168
Unigene0038322	chr2	810630	819168
Unigene0009113	chr2	860353	877815
Unigene0009114	chr2	860353	877815
Unigene0009115	chr2	860353	877815
Unigene0079698	chr2	873017	873614
Unigene0022838	chr2	889482	894316
Unigene0022841	chr2	889482	894316
Unigene0013127	chr2	899081	902585
Unigene0013128	chr2	899081	902585
Unigene0081886	chr2	904014	910787
Unigene0083449	chr2	904014	910787
Unigene0031299	chr2	955360	961247
Unigene0031302	chr2	955360	961247
Unigene0034021	chr2	988404	1024957
Unigene0034022	chr2	988404	1024957
Unigene0072795	chr2	1066809	1067063
Unigene0079196	chr2	1067165	1067394
Unigene0017798	chr2	1160412	1163675
Unigene0022324	chr2	1166696	1171559
Unigene0022321	chr2	1169499	1171559
Unigene0022323	chr2	1169499	1171559
Unigene0009715	chr2	1255011	1259176
Unigene0009716	chr2	1255011	1259176
Unigene0042267	chr2	1311935	1315699
Unigene0084900	chr2	1362420	1365850
Unigene0039318	chr2	1372667	1375767
Unigene0018691	chr2	1385452	1387785
Unigene0063474	chr2	1404368	1404818
Unigene0043128	chr2	1412802	1416736
Unigene0042057	chr2	1429253	1430419
Unigene0015507	chr2	1446946	1455050
Unigene0015508	chr2	1446946	1452538
Unigene0042648	chr2	1478550	1483368
Unigene0025711	chr2	1535882	1542301
Unigene0025711	chr2	1544043	1568593
Unigene0025711	chr2	1546307	1555102
Unigene0057193	chr2	1548935	1556653
Unigene0046499	chr2	1569779	1577996
Unigene0046952	chr2	1583059	1586073
Unigene0039322	chr2	1664371	1665731
Unigene0059112	chr2	1695493	1696664
Unigene0063490	chr2	1696659	1696891
Unigene0059112	chr2	1702893	1705075
Unigene0080352	chr2	1706730	1706981
Unigene0028572	chr2	1744350	1751659
Unigene0028573	chr2	1744350	1751659
Unigene0028576	chr2	1744350	1751659
Unigene0028577	chr2	1744350	1751659
Unigene0028574	chr2	1746060	1751659
Unigene0028575	chr2	1746060	1751659
Unigene0015734	chr2	1760788	1771331
Unigene0015735	chr2	1760788	1771331
Unigene0070651	chr2	1827396	1827976
Unigene0042107	chr2	1875564	1879499
Unigene0084856	chr2	1893137	1894114
Unigene0082375	chr2	1895312	1895983
Unigene0008057	chr2	1912719	1917122
Unigene0028222	chr2	1921611	1925056
Unigene0028224	chr2	1921611	1932654
Unigene0028227	chr2	1921611	1930866
Unigene0028229	chr2	1921611	1932654
Unigene0028236	chr2	1921611	1930866
Unigene0028238	chr2	1921611	1928078
Unigene0028223	chr2	1927957	1932654
Unigene0028228	chr2	1927957	1930866
Unigene0028234	chr2	1927957	1930866
Unigene0028237	chr2	1927957	1932654
Unigene0028233	chr2	1929534	1929843
Unigene0028225	chr2	1929925	1930866
Unigene0028226	chr2	1929925	1930866
Unigene0028230	chr2	1929925	1932654
Unigene0028232	chr2	1929925	1932654
Unigene0085742	chr2	1930993	1932654
Unigene0044249	chr2	1980486	1986294
Unigene0010637	chr2	1994548	1997905
Unigene0010638	chr2	1994548	1997905
Unigene0024802	chr2	2117491	2120362
Unigene0042549	chr2	2134692	2146525
Unigene0045357	chr2	2179971	2180737
Unigene0020119	chr2	2180009	2185048
Unigene0047755	chr2	2184803	2185746
Unigene0000952	chr2	2190876	2191706
Unigene0047191	chr2	2204306	2204586
Unigene0006038	chr2	2206566	2209033
Unigene0001982	chr2	2245165	2245796
Unigene0008046	chr2	2281621	2287811
Unigene0045062	chr2	2307937	2308244
Unigene0043726	chr2	2337418	2345017
Unigene0085546	chr2	2363837	2374019
Unigene0087035	chr2	2363837	2374019
Unigene0047768	chr2	2379126	2380587
Unigene0070904	chr2	2459954	2460491
Unigene0014176	chr2	2466081	2467620
Unigene0014177	chr2	2466081	2467620
Unigene0005448	chr2	2477057	2479730
Unigene0008872	chr2	2534060	2537260
Unigene0049887	chr2	2614525	2617606
Unigene0004526	chr2	2723997	2726357
Unigene0068643	chr2	2755374	2757058
Unigene0066256	chr2	2793479	2794148
Unigene0066211	chr2	2794171	2796777
Unigene0080385	chr2	2797408	2797563
Unigene0004789	chr2	2880832	2886635
Unigene0004790	chr2	2880832	2886404
Unigene0084261	chr2	3042709	3052709
Unigene0087129	chr2	3042709	3052709
Unigene0079388	chr2	3055567	3055835
Unigene0042517	chr2	3066685	3072123
Unigene0043475	chr2	3097077	3100338
Unigene0041616	chr2	3116332	3120994
Unigene0033462	chr2	3128209	3128824
Unigene0000494	chr2	3128221	3128750
Unigene0061490	chr2	3128731	3129164
Unigene0079388	chr2	3203011	3203279
Unigene0042517	chr2	3214130	3219570
Unigene0043475	chr2	3244539	3247800
Unigene0037945	chr2	3261092	3261230
Unigene0041616	chr2	3263796	3268437
Unigene0043743	chr2	3274687	3277617
Unigene0043295	chr2	3286361	3291311
Unigene0046404	chr2	3321709	3326623
Unigene0016586	chr2	3328787	3332757
Unigene0016587	chr2	3328787	3332757
Unigene0007048	chr2	3329951	3330297
Unigene0006174	chr2	3371220	3371709
Unigene0086193	chr2	3396854	3413171
Unigene0044586	chr2	3470555	3473950
Unigene0043002	chr2	3488883	3493858
Unigene0048918	chr2	3498565	3501209
Unigene0005983	chr2	3501185	3509029
Unigene0074011	chr2	3531146	3531500
Unigene0074011	chr2	3556002	3556699
Unigene0079044	chr2	3611991	3612386
Unigene0003508	chr2	3628847	3634945
Unigene0003509	chr2	3628847	3634945
Unigene0017744	chr2	3642497	3647730
Unigene0017745	chr2	3642497	3647730
Unigene0017746	chr2	3642497	3647730
Unigene0017747	chr2	3642497	3647730
Unigene0017748	chr2	3642497	3647730
Unigene0017749	chr2	3642497	3647730
Unigene0034062	chr2	3659783	3661130
Unigene0013882	chr2	3663368	3672900
Unigene0013883	chr2	3663368	3672900
Unigene0013884	chr2	3663368	3672900
Unigene0013885	chr2	3663368	3672900
Unigene0083439	chr2	3665162	3665780
Unigene0039498	chr2	3675745	3677294
Unigene0076257	chr2	3708034	3708436
Unigene0072173	chr2	3708439	3709100
Unigene0041816	chr2	3710227	3714163
Unigene0018939	chr2	3764575	3772632
Unigene0018940	chr2	3764575	3772632
Unigene0018941	chr2	3764575	3772632
Unigene0003880	chr2	3984616	3991129
Unigene0003881	chr2	3984616	3991129
Unigene0015185	chr2	4188814	4189817
Unigene0015188	chr2	4188814	4189817
Unigene0081943	chr2	4228930	4238056
Unigene0084814	chr2	4228930	4238056
Unigene0023158	chr2	4232261	4238056
Unigene0023160	chr2	4232261	4238056
Unigene0010358	chr2	4257367	4262897
Unigene0008447	chr2	4286156	4290716
Unigene0077389	chr2	4287488	4287630
Unigene0072108	chr2	4288818	4289377
Unigene0010340	chr2	4381327	4396082
Unigene0071772	chr2	4401319	4402255
Unigene0007517	chr2	4407571	4409468
Unigene0007518	chr2	4407571	4408873
Unigene0052527	chr2	4437321	4438172
Unigene0047035	chr2	4455290	4455688
Unigene0011881	chr2	4504851	4505022
Unigene0071580	chr2	4512988	4513241
Unigene0044294	chr2	4532235	4534062
Unigene0011881	chr2	4574016	4574149
Unigene0048549	chr2	4579095	4583270
Unigene0047416	chr2	4591123	4596721
Unigene0045630	chr2	4631366	4632057
Unigene0045735	chr2	4633854	4634300
Unigene0003714	chr2	4660645	4667175
Unigene0003715	chr2	4660645	4667175
Unigene0028395	chr2	4745773	4757711
Unigene0028408	chr2	4745773	4757711
Unigene0028426	chr2	4745773	4757711
Unigene0028442	chr2	4745773	4757711
Unigene0028446	chr2	4745773	4757711
Unigene0028366	chr2	4745978	4757711
Unigene0028409	chr2	4745978	4757711
Unigene0028416	chr2	4745978	4757711
Unigene0028472	chr2	4745978	4757711
Unigene0028485	chr2	4745978	4757711
Unigene0075096	chr2	4748594	4748895
Unigene0018640	chr2	4772898	4784268
Unigene0018639	chr2	4779480	4784268
Unigene0026125	chr2	4794466	4795013
Unigene0084294	chr2	4799490	4804190
Unigene0041936	chr2	4808105	4810470
Unigene0033761	chr2	4876963	4879577
Unigene0033762	chr2	4878784	4879229
Unigene0002686	chr2	4884312	4886658
Unigene0049924	chr2	4896364	4919640
Unigene0037435	chr2	4928633	4929931
Unigene0031853	chr2	4966938	5012047
Unigene0082446	chr2	4966938	5012047
Unigene0084244	chr2	4966938	5012047
Unigene0084926	chr2	4966938	5012047
Unigene0084930	chr2	4966938	5012047
Unigene0085518	chr2	4966938	5012047
Unigene0085657	chr2	4966938	5012047
Unigene0031854	chr2	5005879	5012047
Unigene0018946	chr2	5350700	5354334
Unigene0060657	chr2	5363135	5363410
Unigene0048456	chr2	5376029	5382541
Unigene0000969	chr2	5443065	5443432
Unigene0077402	chr2	5443719	5444848
Unigene0046688	chr2	5446643	5451824
Unigene0011401	chr2	5465010	5471277
Unigene0011402	chr2	5465010	5471277
Unigene0039653	chr2	5480651	5483052
Unigene0031188	chr2	5618758	5621731
Unigene0043335	chr2	5625265	5629818
Unigene0034257	chr2	5664122	5666023
Unigene0069601	chr2	5742729	5749764
Unigene0069601	chr2	5742764	5743126
Unigene0002996	chr2	5774560	5779240
Unigene0002997	chr2	5774560	5779240
Unigene0043797	chr2	5788927	5789510
Unigene0043537	chr2	5789565	5791408
Unigene0045597	chr2	5791569	5793900
Unigene0029654	chr2	5822757	5828790
Unigene0029659	chr2	5822757	5828790
Unigene0043175	chr2	5837489	5844000
Unigene0018804	chr2	6046026	6065010
Unigene0005553	chr2	6141640	6147842
Unigene0012924	chr2	6174578	6177891
Unigene0084524	chr2	6174578	6177891
Unigene0042995	chr2	6204115	6218656
Unigene0086755	chr2	6257754	6259131
Unigene0077521	chr2	6315919	6316200
Unigene0070722	chr2	6317147	6318490
Unigene0002522	chr2	6325749	6328135
Unigene0015297	chr2	6336571	6345217
Unigene0040104	chr2	6409397	6414536
Unigene0040105	chr2	6409397	6414536
Unigene0040106	chr2	6409397	6414536
Unigene0040113	chr2	6409397	6414536
Unigene0035195	chr2	6436048	6438678
Unigene0004000	chr2	6468130	6469182
Unigene0083670	chr2	6486881	6491838
Unigene0046706	chr2	6509377	6516719
Unigene0044096	chr2	6562583	6568408
Unigene0024495	chr2	6574250	6581976
Unigene0024496	chr2	6574250	6583091
Unigene0082923	chr2	6590386	6594787
Unigene0086995	chr2	6590386	6594787
Unigene0043473	chr2	6602889	6606255
Unigene0046036	chr2	6647144	6648582
Unigene0016202	chr2	6662509	6667679
Unigene0011350	chr2	6697797	6701849
Unigene0011352	chr2	6697797	6701849
Unigene0011351	chr2	6697848	6701849
Unigene0011353	chr2	6697848	6701849
Unigene0045741	chr2	6740018	6746567
Unigene0037037	chr2	6879474	6879907
Unigene0031720	chr2	6885629	6890939
Unigene0031721	chr2	6885629	6891808
Unigene0031723	chr2	6885629	6891808
Unigene0031724	chr2	6885629	6890939
Unigene0031727	chr2	6885629	6891808
Unigene0031728	chr2	6885629	6890939
Unigene0031729	chr2	6885629	6891808
Unigene0031730	chr2	6885629	6891808
Unigene0085003	chr2	6885629	6891808
Unigene0005128	chr2	6895446	6900586
Unigene0054172	chr2	6898251	6898677
Unigene0004420	chr2	6932593	6934585
Unigene0004421	chr2	6932593	6934497
Unigene0004740	chr2	6942581	6944455
Unigene0014229	chr2	6984749	6988100
Unigene0014231	chr2	6984749	6988100
Unigene0046966	chr2	7002200	7003061
Unigene0046966	chr2	7009014	7009996
Unigene0051215	chr2	7044226	7044927
Unigene0007793	chr2	7060129	7067718
Unigene0007794	chr2	7060129	7067718
Unigene0044652	chr2	7071048	7082405
Unigene0041874	chr2	7101368	7103775
Unigene0003246	chr2	7111080	7112536
Unigene0082866	chr2	7141922	7147124
Unigene0040902	chr2	7156829	7160149
Unigene0040902	chr2	7168076	7172932
Unigene0081311	chr2	7183674	7183905
Unigene0001646	chr2	7186308	7186552
Unigene0068420	chr2	7197867	7198485
Unigene0053694	chr2	7199607	7202367
Unigene0047534	chr2	7213454	7213982
Unigene0047495	chr2	7213960	7214186
Unigene0019251	chr2	7642782	7649397
Unigene0043195	chr2	7704037	7706097
Unigene0048523	chr2	7713465	7717584
Unigene0043551	chr2	7734386	7739033
Unigene0039578	chr2	7911102	7911931
Unigene0043578	chr2	7913835	7919539
Unigene0043272	chr2	7941655	7946289
Unigene0041939	chr2	7952379	7956898
Unigene0006049	chr2	7991955	7994971
Unigene0042537	chr2	8178951	8182269
Unigene0064655	chr2	8226987	8227969
Unigene0087031	chr2	8235376	8239336
Unigene0048674	chr2	8392084	8392953
Unigene0012082	chr2	8739708	8755443
Unigene0072773	chr2	8748520	8748684
Unigene0030240	chr2	8761731	8762602
Unigene0042219	chr2	8769657	8774671
Unigene0019769	chr2	8824064	8827262
Unigene0019770	chr2	8824064	8827262
Unigene0019771	chr2	8824064	8827284
Unigene0019772	chr2	8824064	8827262
Unigene0019773	chr2	8824064	8827284
Unigene0019774	chr2	8824064	8827262
Unigene0019775	chr2	8824064	8827284
Unigene0019776	chr2	8824064	8827262
Unigene0019777	chr2	8824064	8827262
Unigene0019778	chr2	8824064	8827262
Unigene0019779	chr2	8824064	8827284
Unigene0019780	chr2	8824064	8827262
Unigene0039588	chr2	8839125	8842647
Unigene0041482	chr2	8852714	8857103
Unigene0005890	chr2	8877801	8884686
Unigene0005891	chr2	8877801	8884686
Unigene0030928	chr2	8890208	8892334
Unigene0025957	chr2	8899243	8900187
Unigene0023207	chr2	8900173	8901508
Unigene0045051	chr2	9017152	9020058
Unigene0041130	chr2	9026119	9030295
Unigene0003961	chr2	9030275	9036263
Unigene0003962	chr2	9030279	9036263
Unigene0044777	chr2	9072406	9076213
Unigene0004636	chr2	9080409	9080877
Unigene0014958	chr2	9080858	9085181
Unigene0014959	chr2	9080858	9085181
Unigene0042707	chr2	9108398	9110566
Unigene0012135	chr2	9114384	9116543
Unigene0012136	chr2	9114384	9116036
Unigene0006631	chr2	9166608	9170555
Unigene0004655	chr2	9202982	9208927
Unigene0004656	chr2	9202982	9208927
Unigene0006994	chr2	9223255	9263751
Unigene0006995	chr2	9223255	9262803
Unigene0011101	chr2	9270904	9274489
Unigene0002636	chr2	9285032	9293653
Unigene0007673	chr2	9310273	9323549
Unigene0016064	chr2	9440701	9444133
Unigene0016065	chr2	9441654	9444133
Unigene0011768	chr2	9446846	9451125
Unigene0011769	chr2	9446846	9451125
Unigene0041935	chr2	9451624	9456221
Unigene0052562	chr2	9466980	9473653
Unigene0026532	chr2	9515653	9518150
Unigene0009068	chr2	9520754	9521690
Unigene0044008	chr2	9552680	9554859
Unigene0084368	chr2	9557963	9564502
Unigene0042494	chr2	9576633	9578241
Unigene0042202	chr2	9579788	9581193
Unigene0046589	chr2	9619948	9625956
Unigene0013171	chr2	9638792	9640547
Unigene0013172	chr2	9638792	9642549
Unigene0043024	chr2	9769840	9771235
Unigene0015702	chr2	10097064	10111791
Unigene0015703	chr2	10097064	10111791
Unigene0029072	chr2	10127712	10129188
Unigene0030359	chr2	10186394	10190600
Unigene0041419	chr2	10210519	10212622
Unigene0045172	chr2	10217523	10224189
Unigene0086348	chr2	10227459	10229769
Unigene0041744	chr2	10288091	10296937
Unigene0004079	chr2	10299422	10304484
Unigene0034194	chr2	10311728	10320447
Unigene0034199	chr2	10311728	10320447
Unigene0034200	chr2	10311728	10320447
Unigene0034201	chr2	10311728	10320447
Unigene0015377	chr2	10318755	10319527
Unigene0015378	chr2	10318755	10319519
Unigene0015379	chr2	10318755	10319500
Unigene0042988	chr2	10389270	10395701
Unigene0020723	chr2	10396870	10403680
Unigene0034246	chr2	10448689	10449230
Unigene0034248	chr2	10448959	10449345
Unigene0034243	chr2	10449419	10449864
Unigene0046859	chr2	10449489	10449719
Unigene0023439	chr2	10739596	10743385
Unigene0023440	chr2	10739596	10743385
Unigene0062127	chr2	10742776	10742931
Unigene0027469	chr2	10781403	10781732
Unigene0031749	chr2	10782517	10782835
Unigene0031751	chr2	10782539	10782788
Unigene0046596	chr2	10811345	10825033
Unigene0042881	chr2	10845939	10846246
Unigene0043756	chr2	10846262	10848112
Unigene0045634	chr2	10884425	10885503
Unigene0044306	chr2	10885480	10888001
Unigene0053660	chr2	10885536	10885949
Unigene0046964	chr2	10899856	10900542
Unigene0049700	chr2	10900520	10901110
Unigene0049461	chr2	10901234	10901780
Unigene0027469	chr2	10934946	10935275
Unigene0031749	chr2	10936060	10936378
Unigene0031751	chr2	10936082	10936331
Unigene0027468	chr2	10949201	10949435
Unigene0026766	chr2	11070737	11073899
Unigene0026770	chr2	11070737	11073899
Unigene0026771	chr2	11070737	11073928
Unigene0026772	chr2	11070737	11073928
Unigene0026775	chr2	11070737	11073899
Unigene0026776	chr2	11070737	11073928
Unigene0083934	chr2	11070737	11073928
Unigene0026765	chr2	11072465	11073899
Unigene0026767	chr2	11072465	11073928
Unigene0026768	chr2	11072465	11073928
Unigene0026773	chr2	11072465	11073899
Unigene0084523	chr2	11104132	11106955
Unigene0009955	chr2	11104620	11106955
Unigene0015117	chr2	11110931	11117976
Unigene0015115	chr2	11113411	11113990
Unigene0015116	chr2	11113411	11117976
Unigene0043837	chr2	11148320	11152159
Unigene0048154	chr2	11264235	11265376
Unigene0006888	chr2	11276334	11286273
Unigene0040839	chr2	11289571	11339453
Unigene0076629	chr2	11380054	11381250
Unigene0067484	chr2	11381644	11381944
Unigene0079689	chr2	11381938	11382091
Unigene0016548	chr2	11430037	11431705
Unigene0083701	chr2	11430037	11437612
Unigene0024031	chr2	11551602	11558044
Unigene0042321	chr2	11608784	11611653
Unigene0042236	chr2	11699345	11705327
Unigene0044693	chr2	11749962	11755361
Unigene0046717	chr2	11797604	11799803
Unigene0015779	chr2	11807515	11813283
Unigene0041368	chr2	11829723	11834445
Unigene0021766	chr2	11855347	11858193
Unigene0021767	chr2	11855347	11857006
Unigene0044280	chr2	11871328	11878426
Unigene0004878	chr2	11916753	11918135
Unigene0003244	chr2	11986151	11997369
Unigene0003245	chr2	11993422	11997369
Unigene0048419	chr2	11997347	12001980
Unigene0047996	chr2	12001958	12005516
Unigene0063678	chr2	12023294	12024050
Unigene0086047	chr2	12044280	12046747
Unigene0017570	chr2	12045460	12046747
Unigene0017571	chr2	12045460	12047028
Unigene0017572	chr2	12045971	12046747
Unigene0017573	chr2	12045971	12047028
Unigene0049991	chr2	12047009	12047944
Unigene0049100	chr2	12048725	12049659
Unigene0008565	chr2	12071856	12075227
Unigene0039209	chr2	12079436	12082405
Unigene0006285	chr2	12095589	12097840
Unigene0080227	chr2	12121918	12122142
Unigene0042376	chr2	12137782	12140288
Unigene0047247	chr2	12200568	12206169
Unigene0001094	chr2	12214577	12215830
Unigene0003887	chr2	12221323	12225459
Unigene0003888	chr2	12221323	12225459
Unigene0068657	chr2	12247074	12247224
Unigene0069122	chr2	12247700	12248068
Unigene0077881	chr2	12248234	12248641
Unigene0046281	chr2	12381993	12385101
Unigene0018720	chr2	12559356	12563027
Unigene0085768	chr2	12559356	12563027
Unigene0018721	chr2	12559844	12563027
Unigene0085769	chr2	12559844	12563027
Unigene0059354	chr2	12578528	12579380
Unigene0060787	chr2	12579443	12580334
Unigene0044710	chr2	12582905	12585596
Unigene0049450	chr2	12592243	12594769
Unigene0032896	chr2	12603429	12605832
Unigene0032894	chr2	12603441	12611777
Unigene0043076	chr2	12639447	12642000
Unigene0050383	chr2	12670271	12671284
Unigene0043973	chr2	12680240	12685919
Unigene0048071	chr2	12729181	12731669
Unigene0005897	chr2	12731649	12734284
Unigene0046265	chr2	12734286	12734772
Unigene0080455	chr2	12745191	12745391
Unigene0041239	chr2	12748019	12752786
Unigene0013489	chr2	12754346	12758514
Unigene0013490	chr2	12754346	12758514
Unigene0013491	chr2	12756987	12758514
Unigene0045292	chr2	12759358	12764673
Unigene0050079	chr2	12766460	12768185
Unigene0050908	chr2	12768165	12769052
Unigene0004346	chr2	12779963	12786768
Unigene0037002	chr2	12870748	12871371
Unigene0037004	chr2	12871488	12872071
Unigene0086912	chr2	12910988	12919985
Unigene0080922	chr2	13156082	13156252
Unigene0046592	chr2	13160543	13161224
Unigene0017358	chr2	13173059	13173653
Unigene0015516	chr2	13173517	13174634
Unigene0015516	chr2	13195513	13196309
Unigene0046671	chr2	13197782	13206421
Unigene0041736	chr2	13237373	13242731
Unigene0044307	chr2	13268436	13269726
Unigene0011828	chr2	13289353	13291373
Unigene0011829	chr2	13289353	13291373
Unigene0011830	chr2	13289353	13290317
Unigene0011831	chr2	13289353	13290317
Unigene0007162	chr2	13310345	13311346
Unigene0005728	chr2	13356770	13370166
Unigene0005729	chr2	13356770	13370166
Unigene0086193	chr2	13380642	13392983
Unigene0017625	chr2	13399774	13408798
Unigene0017626	chr2	13399774	13408798
Unigene0007483	chr2	13414125	13420402
Unigene0007484	chr2	13414125	13420402
Unigene0004150	chr2	13425861	13427101
Unigene0077600	chr2	13757837	13759341
Unigene0045282	chr2	13790764	13794335
Unigene0046881	chr2	13794367	13794994
Unigene0004689	chr2	13797482	13797984
Unigene0045173	chr2	13859384	13863362
Unigene0047055	chr2	13910245	13914929
Unigene0046581	chr2	13915729	13917334
Unigene0035143	chr2	13918909	13925397
Unigene0035145	chr2	13918909	13930707
Unigene0035146	chr2	13918909	13930707
Unigene0080389	chr2	13926614	13926832
Unigene0035147	chr2	13930979	13931797
Unigene0014953	chr2	13958170	13960079
Unigene0014954	chr2	13958170	13960079
Unigene0006903	chr2	14020314	14023572
Unigene0006904	chr2	14020314	14023572
Unigene0002036	chr2	14023550	14025923
Unigene0047548	chr2	14025902	14029681
Unigene0002403	chr2	14030272	14030948
Unigene0040638	chr2	14051748	14054361
Unigene0019270	chr2	14084875	14097951
Unigene0049080	chr2	14143148	14146852
Unigene0045580	chr2	14195224	14196839
Unigene0070424	chr2	14347073	14347265
Unigene0042313	chr2	14523859	14531021
Unigene0022750	chr2	14713482	14720452
Unigene0036998	chr2	14723783	14727824
Unigene0083000	chr2	14825671	14829389
Unigene0014656	chr2	14841288	14844467
Unigene0022364	chr2	14849862	14857347
Unigene0022367	chr2	14849862	14852341
Unigene0027918	chr2	14867235	14871296
Unigene0027919	chr2	14867541	14871296
Unigene0018225	chr2	14904696	14911768
Unigene0018226	chr2	14904696	14911768
Unigene0052844	chr2	14942507	14944306
Unigene0045343	chr2	15065416	15070953
Unigene0041814	chr2	15379891	15384852
Unigene0042953	chr2	15445242	15449045
Unigene0071156	chr2	15547736	15547957
Unigene0043416	chr2	15549702	15551668
Unigene0050150	chr2	15556107	15557023
Unigene0027260	chr2	15812797	15817925
Unigene0006176	chr2	15840204	15846142
Unigene0009035	chr2	15849735	15855553
Unigene0051664	chr2	16023137	16023801
Unigene0021126	chr2	16054804	16055227
Unigene0021127	chr2	16054804	16055227
Unigene0066860	chr2	16144254	16144861
Unigene0065137	chr2	16162451	16162659
Unigene0006783	chr2	16165962	16171061
Unigene0066860	chr2	16177331	16177938
Unigene0052998	chr2	16197146	16197450
Unigene0052977	chr2	16197432	16198254
Unigene0014477	chr2	16272046	16278193
Unigene0014478	chr2	16272046	16278193
Unigene0014479	chr2	16272046	16278193
Unigene0014480	chr2	16272046	16278193
Unigene0014476	chr2	16272350	16278193
Unigene0014481	chr2	16272350	16278193
Unigene0047643	chr2	16283525	16283682
Unigene0047169	chr2	16285026	16285225
Unigene0019438	chr2	16720225	16746983
Unigene0046631	chr2	16816107	16822532
Unigene0038309	chr2	16841016	16841159
Unigene0017239	chr2	16856544	16858524
Unigene0045036	chr2	16881905	16900612
Unigene0006868	chr2	16951707	16965028
Unigene0008371	chr2	17074288	17079859
Unigene0007970	chr2	17170604	17175491
Unigene0037506	chr2	17202497	17202833
Unigene0031193	chr2	17203117	17221317
Unigene0034577	chr2	17222497	17222787
Unigene0048332	chr2	17253631	17254910
Unigene0044906	chr2	17383706	17390083
Unigene0082830	chr2	17465721	17466806
Unigene0003410	chr2	17542685	17547383
Unigene0006283	chr2	17551140	17551542
Unigene0045726	chr2	17963929	17967378
Unigene0009273	chr2	18057068	18064465
Unigene0009274	chr2	18057068	18064465
Unigene0009275	chr2	18057140	18064465
Unigene0009276	chr2	18057140	18064465
Unigene0017952	chr2	18207603	18218664
Unigene0017953	chr2	18207603	18214808
Unigene0044886	chr2	18302852	18308283
Unigene0003931	chr2	18354069	18357793
Unigene0045925	chr2	18355135	18355574
Unigene0032964	chr2	18452422	18455975
Unigene0032976	chr2	18452422	18455582
Unigene0032960	chr2	18453755	18455582
Unigene0032990	chr2	18453755	18455975
Unigene0039880	chr2	18466843	18467381
Unigene0039880	chr2	18468202	18469000
Unigene0039877	chr2	18468342	18469000
Unigene0039877	chr2	18473996	18474649
Unigene0039880	chr2	18473996	18474789
Unigene0032934	chr2	18495653	18500704
Unigene0032935	chr2	18495653	18500704
Unigene0032936	chr2	18495653	18496559
Unigene0032940	chr2	18495653	18500704
Unigene0032941	chr2	18495653	18500704
Unigene0032942	chr2	18495653	18500704
Unigene0032943	chr2	18495653	18496559
Unigene0032944	chr2	18495653	18496559
Unigene0032945	chr2	18495653	18497004
Unigene0032946	chr2	18495653	18500704
Unigene0032948	chr2	18495653	18500704
Unigene0032949	chr2	18495653	18496559
Unigene0032950	chr2	18495653	18500704
Unigene0032951	chr2	18495653	18500704
Unigene0032953	chr2	18495653	18500704
Unigene0032954	chr2	18495653	18495777
Unigene0032955	chr2	18495653	18500704
Unigene0032957	chr2	18495653	18500704
Unigene0032958	chr2	18495653	18500704
Unigene0032959	chr2	18495653	18500704
Unigene0032961	chr2	18495653	18500704
Unigene0032962	chr2	18495653	18500704
Unigene0032965	chr2	18495653	18500704
Unigene0032967	chr2	18495653	18500704
Unigene0032968	chr2	18495653	18500704
Unigene0032969	chr2	18495653	18500704
Unigene0032971	chr2	18495653	18500704
Unigene0032973	chr2	18495653	18500704
Unigene0032974	chr2	18495653	18500704
Unigene0032977	chr2	18495653	18500704
Unigene0032978	chr2	18495653	18500704
Unigene0032979	chr2	18495653	18500704
Unigene0032981	chr2	18495653	18500704
Unigene0032984	chr2	18495653	18500704
Unigene0032988	chr2	18495653	18500704
Unigene0032989	chr2	18495653	18500704
Unigene0032991	chr2	18495653	18500704
Unigene0084952	chr2	18495653	18500704
Unigene0032937	chr2	18495885	18500704
Unigene0032938	chr2	18495885	18496559
Unigene0032939	chr2	18495885	18500704
Unigene0032947	chr2	18495885	18500704
Unigene0032952	chr2	18495885	18500704
Unigene0032956	chr2	18495885	18500704
Unigene0032963	chr2	18495885	18500704
Unigene0032966	chr2	18495885	18500704
Unigene0032970	chr2	18495885	18500704
Unigene0032972	chr2	18495885	18500704
Unigene0032975	chr2	18495885	18500704
Unigene0032980	chr2	18495885	18500704
Unigene0032982	chr2	18495885	18500704
Unigene0032983	chr2	18495885	18496559
Unigene0032985	chr2	18495885	18500704
Unigene0032986	chr2	18495885	18500704
Unigene0032987	chr2	18495885	18500704
Unigene0032992	chr2	18495885	18500704
Unigene0032993	chr2	18495885	18497004
Unigene0043343	chr2	18773681	18779531
Unigene0066050	chr2	18892051	18892836
Unigene0076914	chr2	18892882	18893942
Unigene0007898	chr2	18920046	18927408
Unigene0041054	chr2	18971241	18972177
Unigene0084385	chr2	18978480	18985308
Unigene0084386	chr2	18979044	18985308
Unigene0041054	chr2	18997072	19005262
Unigene0016208	chr2	19054347	19056444
Unigene0081711	chr2	19054347	19056444
Unigene0018449	chr2	19060818	19066039
Unigene0018449	chr2	19100445	19104049
Unigene0012053	chr2	19134536	19140092
Unigene0012055	chr2	19134536	19140092
Unigene0028071	chr2	19140977	19147564
Unigene0028069	chr2	19140989	19147564
Unigene0028070	chr2	19142406	19147564
Unigene0047652	chr2	19461372	19461862
Unigene0051423	chr2	19488150	19494466
Unigene0064061	chr2	19496047	19496515
Unigene0055293	chr2	19533473	19534084
Unigene0072847	chr2	19564449	19564677
Unigene0055823	chr2	19565403	19565856
Unigene0081214	chr2	19640638	19640838
Unigene0008735	chr2	19672075	19674314
Unigene0081635	chr2	19674406	19684122
Unigene0018422	chr2	19682786	19684122
Unigene0018725	chr2	19726392	19733207
Unigene0018724	chr2	19727108	19733207
Unigene0072293	chr2	19749793	19750034
Unigene0044186	chr2	19770314	19773952
Unigene0009161	chr2	19817620	19820211
Unigene0042035	chr2	19819048	19819891
Unigene0041336	chr2	19819895	19821116
Unigene0024784	chr2	19840109	19840661
Unigene0024783	chr2	19840356	19840661
Unigene0024785	chr2	19840356	19840661
Unigene0024784	chr2	19847962	19848502
Unigene0024783	chr2	19848204	19848502
Unigene0083362	chr2	19853473	19854467
Unigene0024783	chr2	19854036	19854467
Unigene0024784	chr2	19854198	19854467
Unigene0046558	chr2	19937928	19942745
Unigene0003847	chr2	20048476	20080206
Unigene0017706	chr2	20093205	20096519
Unigene0028849	chr2	20158720	20173797
Unigene0028850	chr2	20158720	20173797
Unigene0052777	chr2	20350024	20354089
Unigene0023683	chr2	20581820	20587632
Unigene0023686	chr2	20581820	20594251
Unigene0075829	chr2	20611176	20614810
Unigene0010974	chr2	20668862	20677130
Unigene0010976	chr2	20668862	20677130
Unigene0009587	chr2	20723395	20732589
Unigene0009588	chr2	20723775	20732589
Unigene0007315	chr2	20757762	20762177
Unigene0011278	chr2	20767645	20775466
Unigene0015856	chr2	20790591	20795651
Unigene0015857	chr2	20795716	20798514
Unigene0004563	chr2	20802360	20806141
Unigene0084341	chr2	20808801	20814902
Unigene0013953	chr2	20823015	20825574
Unigene0013953	chr2	20830265	20831772
Unigene0041321	chr2	21162120	21168416
Unigene0057718	chr2	21162775	21163246
Unigene0037402	chr2	21366433	21369282
Unigene0082587	chr2	21366433	21370487
Unigene0084890	chr2	21366433	21370487
Unigene0082491	chr2	21366440	21370487
Unigene0086326	chr2	21366440	21370487
Unigene0037398	chr2	21370620	21371690
Unigene0042066	chr2	21406252	21407261
Unigene0038457	chr2	21410553	21414477
Unigene0038457	chr2	21417292	21421055
Unigene0044308	chr2	21621622	21622068
Unigene0024764	chr2	21803352	21817437
Unigene0085135	chr2	21803352	21817437
Unigene0051822	chr2	21832176	21834384
Unigene0075630	chr2	21853546	21858045
Unigene0037369	chr2	21983965	21986464
Unigene0042070	chr2	21985065	21985279
Unigene0037370	chr2	21986470	21987156
Unigene0037369	chr2	22089672	22092741
Unigene0042070	chr2	22091342	22091556
Unigene0037370	chr2	22092747	22093421
Unigene0037371	chr2	22092747	22093421
Unigene0083818	chr2	22098956	22109304
Unigene0083819	chr2	22098956	22109304
Unigene0044656	chr2	22125881	22126382
Unigene0018130	chr2	22164694	22168847
Unigene0045026	chr2	22166565	22166904
Unigene0042955	chr2	22202842	22208576
Unigene0044244	chr2	22209303	22214102
Unigene0026331	chr2	22474412	22474810
Unigene0036733	chr2	22763197	22869469
Unigene0036733	chr2	22780791	22780964
Unigene0036740	chr2	22787863	22873156
Unigene0036736	chr2	22817619	22817797
Unigene0036740	chr2	22817619	22844809
Unigene0036743	chr2	22818865	22819482
Unigene0036725	chr2	22832469	22832898
Unigene0036743	chr2	22833279	22833654
Unigene0036736	chr2	22844242	22844481
Unigene0036725	chr2	22844580	22845163
Unigene0036743	chr2	22845557	22845944
Unigene0036728	chr2	22868086	22868196
Unigene0036733	chr2	22869015	22869187
Unigene0036725	chr2	22872920	22880893
Unigene0036736	chr2	22879972	22880211
Unigene0036743	chr2	22881287	22881674
Unigene0036725	chr2	22911036	22911453
Unigene0004882	chr2	22953390	22957009
Unigene0047275	chr2	23023182	23026401
Unigene0011001	chr2	23029165	23034047
Unigene0011000	chr2	23030144	23034047
Unigene0007913	chr2	23220875	23223568
Unigene0045026	chr2	23240158	23241046
Unigene0042986	chr2	23242061	23242331
Unigene0041680	chr2	23281807	23285653
Unigene0027641	chr2	23308026	23310144
Unigene0027645	chr2	23308026	23310144
Unigene0062799	chr2	23336680	23337213
Unigene0027641	chr2	23347967	23350926
Unigene0027645	chr2	23347967	23350926
Unigene0042710	chr2	23474320	23482736
Unigene0055779	chr2	23492483	23494772
Unigene0004971	chr2	23586508	23587996
Unigene0004970	chr2	23586651	23587996
Unigene0047608	chr2	23588008	23588382
Unigene0046810	chr2	23588698	23589796
Unigene0047065	chr2	23589787	23590009
Unigene0046882	chr2	23589910	23590537
Unigene0045336	chr2	23590515	23591410
Unigene0043833	chr2	23591391	23591762
Unigene0010970	chr2	23594885	23602482
Unigene0041330	chr2	23691338	23696436
Unigene0041330	chr2	23818937	23824035
Unigene0038309	chr2	23909643	23909785
Unigene0038309	chr2	23916659	23916802
Unigene0049560	chr2	24006215	24014481
Unigene0044063	chr2	24068465	24071501
Unigene0043188	chr2	24072254	24075228
Unigene0028068	chr2	24218881	24222786
Unigene0042283	chr2	24238938	24244295
Unigene0025937	chr2	24246843	24250548
Unigene0083450	chr2	24246843	24250548
Unigene0084318	chr2	24246843	24250548
Unigene0025936	chr2	24248475	24250548
Unigene0044803	chr2	24285917	24297015
Unigene0037222	chr2	24297707	24299171
Unigene0005124	chr2	24301791	24312981
Unigene0005125	chr2	24302677	24312981
Unigene0059662	chr2	24304250	24304628
Unigene0050608	chr2	24319898	24321673
Unigene0005210	chr2	24323641	24325571
Unigene0022267	chr2	24337043	24337334
Unigene0043952	chr2	24352248	24361345
Unigene0053778	chr2	24420177	24481827
Unigene0053778	chr2	24481480	24481772
Unigene0079947	chr2	24498315	24498844
Unigene0079947	chr2	24512359	24512922
Unigene0079947	chr2	24523707	24524064
Unigene0005431	chr2	24643658	24646001
Unigene0086186	chr2	24652697	24654764
Unigene0086609	chr2	24652697	24657205
Unigene0074123	chr2	24684758	24685414
Unigene0081173	chr2	24685442	24685644
Unigene0018660	chr2	24895311	24895521
Unigene0018660	chr2	24904107	24904315
Unigene0006678	chr2	24911496	24916522
Unigene0006679	chr2	24911496	24916217
Unigene0070603	chr2	24940839	24941062
Unigene0010224	chr2	24978293	24984618
Unigene0010225	chr2	24978293	24984618
Unigene0045513	chr2	25002118	25002574
Unigene0017348	chr2	25003188	25009012
Unigene0017349	chr2	25003188	25009012
Unigene0017350	chr2	25003188	25009012
Unigene0017351	chr2	25003188	25009012
Unigene0011266	chr2	25062299	25068923
Unigene0006628	chr2	25119607	25132866
Unigene0006629	chr2	25119607	25132866
Unigene0045289	chr2	25136312	25137092
Unigene0045225	chr2	25284142	25289185
Unigene0044311	chr2	25294555	25300327
Unigene0051131	chr2	25310879	25312043
Unigene0050819	chr2	25315215	25315780
Unigene0050226	chr2	25316064	25316434
Unigene0022546	chr2	25382446	25383629
Unigene0022545	chr2	25383530	25383844
Unigene0062879	chr2	25383671	25390886
Unigene0035720	chr2	25400600	25401074
Unigene0036839	chr2	25461068	25461377
Unigene0007094	chr2	25467516	25467768
Unigene0035720	chr2	25507585	25507967
Unigene0035733	chr2	25508814	25508934
Unigene0044363	chr2	25551857	25557423
Unigene0013598	chr2	25592116	25597252
Unigene0013599	chr2	25592116	25597252
Unigene0033444	chr2	25631091	25645793
Unigene0046140	chr2	25685312	25688688
Unigene0020029	chr2	25874042	25877096
Unigene0020030	chr2	25874042	25877096
Unigene0020031	chr2	25874581	25877096
Unigene0002844	chr2	25893186	25894341
Unigene0002845	chr2	25893186	25894341
Unigene0020648	chr2	25942011	25947377
Unigene0020649	chr2	25942011	25947274
Unigene0020650	chr2	25942011	25947274
Unigene0083138	chr2	25942011	25947274
Unigene0083139	chr2	25942011	25947274
Unigene0083140	chr2	25942011	25947377
Unigene0009128	chr2	25955530	25962694
Unigene0006788	chr2	25976112	25981837
Unigene0006788	chr2	26038922	26043831
Unigene0009128	chr2	26058042	26065205
Unigene0020648	chr2	26073307	26078715
Unigene0083140	chr2	26073307	26078715
Unigene0020649	chr2	26073435	26078715
Unigene0083139	chr2	26073435	26078715
Unigene0020650	chr2	26073457	26078715
Unigene0083138	chr2	26073457	26078715
Unigene0004370	chr2	26131729	26138286
Unigene0004371	chr2	26131729	26138286
Unigene0062919	chr2	26161481	26161727
Unigene0050413	chr2	26394954	26398098
Unigene0048274	chr2	26434919	26435189
Unigene0024771	chr2	26442770	26448444
Unigene0025250	chr2	26502562	26504775
Unigene0013971	chr2	26542382	26549124
Unigene0085414	chr2	26543088	26543451
Unigene0013970	chr2	26544117	26549124
Unigene0087126	chr2	26558843	26560894
Unigene0039206	chr2	26578014	26580172
Unigene0041342	chr2	26625732	26628241
Unigene0055092	chr2	26626086	26626407
Unigene0045964	chr2	26666380	26667993
Unigene0044250	chr2	26732406	26736627
Unigene0079487	chr2	26748176	26748418
Unigene0007704	chr2	26772870	26778683
Unigene0049527	chr2	26895604	26896973
Unigene0003189	chr2	26898497	26899089
Unigene0076130	chr2	27010547	27010877
Unigene0044100	chr2	27086769	27092326
Unigene0044609	chr2	27093260	27094074
Unigene0037834	chr2	27095769	27099093
Unigene0033460	chr2	27138879	27141361
Unigene0033457	chr2	27140083	27141655
Unigene0041243	chr2	27148323	27148709
Unigene0009660	chr2	27152321	27155086
Unigene0009661	chr2	27152321	27155086
Unigene0008947	chr2	27164535	27175026
Unigene0050097	chr2	27189864	27190118
Unigene0043228	chr2	27227000	27230746
Unigene0043543	chr2	27358196	27361416
Unigene0042458	chr2	27431513	27432011
Unigene0004476	chr2	27453379	27457950
Unigene0009097	chr2	27499577	27508795
Unigene0047613	chr2	27501082	27501462
Unigene0044920	chr2	27517662	27519499
Unigene0042913	chr2	27669988	27673676
Unigene0023496	chr2	27694494	27694694
Unigene0017644	chr2	27715887	27721521
Unigene0017645	chr2	27715887	27721521
Unigene0017646	chr2	27715887	27721521
Unigene0017647	chr2	27715887	27721521
Unigene0017648	chr2	27715887	27721521
Unigene0017649	chr2	27715887	27721521
Unigene0064146	chr2	27741193	27741418
Unigene0003293	chr2	27747667	27749161
Unigene0015510	chr2	27749408	27757606
Unigene0015511	chr2	27749408	27757606
Unigene0015512	chr2	27749408	27757606
Unigene0015514	chr2	27749408	27757606
Unigene0059911	chr2	27811733	27812477
Unigene0002027	chr2	27827800	27832700
Unigene0002028	chr2	27827800	27832700
Unigene0072888	chr2	27838916	27839156
Unigene0046464	chr2	27851648	27853130
Unigene0047324	chr2	27853112	27854380
Unigene0046567	chr2	27854597	27855066
Unigene0005328	chr2	27859686	27859959
Unigene0048077	chr2	27860136	27860671
Unigene0048921	chr2	27860654	27861862
Unigene0049707	chr2	27876885	27878649
Unigene0079647	chr2	27941825	27942041
Unigene0042697	chr2	28019149	28026830
Unigene0041259	chr2	28117750	28120223
Unigene0073291	chr2	28129897	28130491
Unigene0008241	chr2	28272673	28278605
Unigene0008242	chr2	28272673	28278605
Unigene0001568	chr2	28275738	28275924
Unigene0024384	chr2	28294452	28302364
Unigene0024385	chr2	28294452	28302364
Unigene0024386	chr2	28294452	28302364
Unigene0024387	chr2	28294452	28302364
Unigene0024388	chr2	28294452	28302364
Unigene0024389	chr2	28294452	28296039
Unigene0024390	chr2	28294452	28295975
Unigene0024391	chr2	28294452	28302364
Unigene0024392	chr2	28294452	28302364
Unigene0024393	chr2	28294452	28302364
Unigene0081177	chr2	28301011	28301221
Unigene0022589	chr2	28536789	28542136
Unigene0045486	chr2	28537882	28538130
Unigene0021550	chr2	28557077	28557497
Unigene0055667	chr2	28557477	28561409
Unigene0045865	chr2	28572079	28576172
Unigene0046674	chr2	28576159	28586543
Unigene0056564	chr2	28576162	28576759
Unigene0046842	chr2	28587142	28594668
Unigene0047771	chr2	28595186	28596946
Unigene0027904	chr2	28621982	28626621
Unigene0027905	chr2	28621982	28629138
Unigene0027906	chr2	28621982	28629138
Unigene0027907	chr2	28621982	28626621
Unigene0013453	chr2	28645164	28645815
Unigene0064266	chr2	28645855	28646167
Unigene0024321	chr2	28713760	28726605
Unigene0024322	chr2	28713760	28726605
Unigene0024325	chr2	28713760	28726605
Unigene0024327	chr2	28713760	28726605
Unigene0024320	chr2	28714293	28726605
Unigene0024323	chr2	28714293	28726605
Unigene0024324	chr2	28714293	28726605
Unigene0024326	chr2	28714293	28726605
Unigene0006649	chr2	28717383	28717530
Unigene0082282	chr2	28776848	28782230
Unigene0016740	chr2	28793406	28793701
Unigene0075483	chr2	28869152	28869390
Unigene0044923	chr2	28869368	28873046
Unigene0048458	chr2	28974325	28975796
Unigene0047713	chr2	28976001	28977570
Unigene0083547	chr2	29058894	29059724
Unigene0020434	chr2	29062747	29063050
Unigene0047893	chr2	29078631	29079110
Unigene0047382	chr2	29079087	29098246
Unigene0047893	chr2	29096713	29097202
Unigene0047382	chr2	29097179	29106007
Unigene0047893	chr2	29104518	29104869
Unigene0024136	chr2	29118548	29125306
Unigene0015120	chr2	29140685	29142447
Unigene0043152	chr2	29153275	29157971
Unigene0017508	chr2	29172561	29176550
Unigene0047889	chr2	29183073	29183431
Unigene0005228	chr2	29276556	29277410
Unigene0046542	chr2	29277389	29279057
Unigene0039960	chr2	29283421	29285730
Unigene0026778	chr2	29306800	29310260
Unigene0005655	chr2	29329183	29337334
Unigene0059275	chr2	29334607	29334791
Unigene0013867	chr2	29345525	29348762
Unigene0016825	chr2	29388575	29397196
Unigene0016826	chr2	29388575	29397196
Unigene0016827	chr2	29388575	29397196
Unigene0016828	chr2	29388575	29397196
Unigene0006170	chr2	29414229	29418335
Unigene0022723	chr2	29631353	29635020
Unigene0022724	chr2	29631353	29635020
Unigene0002679	chr2	29635616	29639875
Unigene0080683	chr2	29694866	29695138
Unigene0026604	chr2	29710226	29716117
Unigene0026605	chr2	29713906	29716117
Unigene0045387	chr2	29720501	29725440
Unigene0028151	chr2	29726545	29727833
Unigene0028152	chr2	29727839	29732862
Unigene0028150	chr2	29727842	29732720
Unigene0013259	chr2	29761157	29763002
Unigene0037262	chr2	29777162	29777466
Unigene0084196	chr2	29777521	29777827
Unigene0021851	chr2	29809103	29813453
Unigene0021857	chr2	29809103	29813453
Unigene0021858	chr2	29809103	29813453
Unigene0021859	chr2	29809103	29813453
Unigene0021860	chr2	29809103	29813453
Unigene0021862	chr2	29809103	29813453
Unigene0021852	chr2	29809117	29813453
Unigene0021853	chr2	29809117	29813453
Unigene0021854	chr2	29809117	29813453
Unigene0021855	chr2	29809117	29813453
Unigene0021856	chr2	29809117	29813453
Unigene0021861	chr2	29809117	29813453
Unigene0066991	chr2	29885228	29885496
Unigene0048461	chr2	29888388	29894696
Unigene0000635	chr2	29900873	29902792
Unigene0000636	chr2	29900873	29902792
Unigene0036221	chr2	29905121	29906129
Unigene0036616	chr2	29951271	29951478
Unigene0037068	chr2	29994331	29994584
Unigene0037068	chr2	30007470	30007769
Unigene0041773	chr2	30017703	30021171
Unigene0028149	chr2	30260373	30262745
Unigene0028148	chr2	30261541	30261839
Unigene0019046	chr2	30265859	30268223
Unigene0042179	chr2	30285147	30288445
Unigene0043841	chr2	30388191	30389229
Unigene0009967	chr2	30389119	30390808
Unigene0009968	chr2	30389119	30390808
Unigene0041044	chr2	30398753	30399347
Unigene0041044	chr2	30403293	30403701
Unigene0043211	chr2	30467002	30467776
Unigene0043719	chr2	30509224	30514735
Unigene0023123	chr2	30522189	30528711
Unigene0023128	chr2	30522189	30526378
Unigene0049030	chr2	30552602	30553450
Unigene0041240	chr2	30620398	30623444
Unigene0046714	chr2	30628518	30648071
Unigene0074323	chr2	30645233	30645419
Unigene0010283	chr2	30670445	30678461
Unigene0010284	chr2	30670445	30678482
Unigene0010285	chr2	30670445	30678171
Unigene0010286	chr2	30670445	30678171
Unigene0026547	chr2	30688049	30688523
Unigene0004111	chr2	30693906	30698060
Unigene0032275	chr2	30701322	30703386
Unigene0032283	chr2	30702861	30703386
Unigene0046819	chr2	30703371	30703785
Unigene0005061	chr2	30705640	30706280
Unigene0003154	chr2	30789926	30793036
Unigene0003153	chr2	30792841	30793036
Unigene0047365	chr2	30793023	30793671
Unigene0017223	chr2	30820715	30823173
Unigene0010926	chr2	30841505	30849682
Unigene0080750	chr2	30873015	30873217
Unigene0074753	chr2	30873370	30873675
Unigene0012132	chr2	30874008	30874285
Unigene0061430	chr2	30875697	30876001
Unigene0000415	chr2	30876812	30877296
Unigene0069378	chr2	30877376	30877641
Unigene0066539	chr2	30878354	30879323
Unigene0011194	chr2	30883526	30886226
Unigene0011196	chr2	30883526	30886282
Unigene0022905	chr2	30891105	30899168
Unigene0022907	chr2	30891105	30899168
Unigene0022906	chr2	30892630	30899168
Unigene0023759	chr2	30921057	30922199
Unigene0019372	chr2	30939848	30944017
Unigene0084214	chr2	30966436	30971163
Unigene0015553	chr2	30976315	30979954
Unigene0027339	chr2	30981115	30984013
Unigene0027341	chr2	30981115	30983661
Unigene0025571	chr2	31002257	31002410
Unigene0025571	chr2	31055835	31056001
Unigene0046408	chr2	31068498	31069696
Unigene0047234	chr2	31069676	31070481
Unigene0046238	chr2	31070462	31071638
Unigene0047600	chr2	31071997	31073162
Unigene0021175	chr2	31073640	31077376
Unigene0021177	chr2	31073640	31077376
Unigene0021178	chr2	31073640	31077170
Unigene0021174	chr2	31073897	31077376
Unigene0021176	chr2	31073897	31077353
Unigene0021179	chr2	31073897	31077376
Unigene0007469	chr2	31102595	31106253
Unigene0026284	chr2	31167594	31175624
Unigene0026285	chr2	31167594	31175624
Unigene0026286	chr2	31167594	31175624
Unigene0026287	chr2	31167594	31175624
Unigene0026288	chr2	31167594	31175624
Unigene0026289	chr2	31167594	31175624
Unigene0081545	chr2	31167594	31175836
Unigene0083847	chr2	31167594	31175624
Unigene0008657	chr2	31177982	31181500
Unigene0025725	chr2	31439018	31446583
Unigene0086630	chr2	31439888	31446583
Unigene0019547	chr2	31453851	31458228
Unigene0019546	chr2	31458580	31459491
Unigene0000793	chr2	31465899	31466169
Unigene0062514	chr2	31489849	31490087
Unigene0062514	chr2	31494926	31495164
Unigene0012849	chr2	31500889	31503197
Unigene0012850	chr2	31500889	31503197
Unigene0012851	chr2	31500889	31503197
Unigene0012852	chr2	31500889	31503197
Unigene0036905	chr2	31503174	31505461
Unigene0060963	chr2	31504368	31504709
Unigene0027920	chr2	31571754	31575116
Unigene0004621	chr2	31592191	31597520
Unigene0044825	chr2	31601326	31608412
Unigene0067492	chr2	31602503	31602717
Unigene0081967	chr2	31618712	31621891
Unigene0082921	chr2	31618712	31621891
Unigene0083665	chr2	31618712	31621891
Unigene0043216	chr2	31629581	31633003
Unigene0044396	chr2	31692801	31694698
Unigene0010920	chr2	31707537	31710072
Unigene0010921	chr2	31707537	31710072
Unigene0042007	chr2	31722884	31726016
Unigene0047111	chr2	31753757	31754027
Unigene0011292	chr2	31763325	31778266
Unigene0011293	chr2	31763325	31778266
Unigene0011294	chr2	31763325	31778266
Unigene0011295	chr2	31763325	31778266
Unigene0051169	chr2	31791082	31792722
Unigene0043935	chr2	31841066	31844464
Unigene0045102	chr2	31891457	31897467
Unigene0010287	chr2	31900058	31905418
Unigene0010289	chr2	31900058	31905418
Unigene0082920	chr2	31906573	31909931
Unigene0046462	chr2	31926997	31928034
Unigene0038378	chr2	31975675	31983363
Unigene0038377	chr2	31977191	31983363
Unigene0010015	chr2	31982947	31983818
Unigene0077837	chr2	32042562	32042764
Unigene0080060	chr2	32043274	32043490
Unigene0011190	chr2	32049826	32056219
Unigene0011191	chr2	32049826	32056219
Unigene0011192	chr2	32050841	32056219
Unigene0011193	chr2	32050841	32056219
Unigene0030840	chr2	32058459	32060303
Unigene0041044	chr2	32061731	32062155
Unigene0041044	chr2	32068666	32083665
Unigene0041044	chr2	32079534	32079864
Unigene0040257	chr2	32115884	32152212
Unigene0040271	chr2	32115884	32152212
Unigene0040286	chr2	32115884	32152212
Unigene0040337	chr2	32115884	32152212
Unigene0084636	chr2	32116481	32152212
Unigene0040279	chr2	32117966	32152212
Unigene0040361	chr2	32117966	32152212
Unigene0042425	chr2	32192495	32196538
Unigene0046323	chr2	32236985	32249104
Unigene0066132	chr2	32247541	32247766
Unigene0018173	chr2	32250357	32251531
Unigene0005958	chr2	32286909	32349398
Unigene0026310	chr2	32329416	32329776
Unigene0026311	chr2	32329779	32330117
Unigene0005958	chr2	32345474	32349021
Unigene0026311	chr2	32388588	32399562
Unigene0050556	chr2	32401812	32402526
Unigene0037355	chr2	32411692	32411997
Unigene0037353	chr2	32411714	32412006
Unigene0037350	chr2	32414001	32414584
Unigene0037358	chr2	32414047	32414833
Unigene0037236	chr2	32418164	32424574
Unigene0037238	chr2	32418164	32423284
Unigene0045319	chr2	32418484	32421197
Unigene0037234	chr2	32423511	32424135
Unigene0005565	chr2	32485148	32486496
Unigene0005566	chr2	32485148	32486496
Unigene0037843	chr2	32518686	32523723
Unigene0037844	chr2	32521104	32523723
Unigene0037847	chr2	32521104	32523723
Unigene0027823	chr2	32533050	32540231
Unigene0027824	chr2	32533050	32540231
Unigene0027825	chr2	32533050	32540231
Unigene0027826	chr2	32533050	32540231
Unigene0027827	chr2	32533050	32540231
Unigene0027828	chr2	32533050	32540231
Unigene0027829	chr2	32533050	32540231
Unigene0027830	chr2	32533050	32540231
Unigene0027831	chr2	32533050	32540231
Unigene0027833	chr2	32533050	32540231
Unigene0027834	chr2	32533050	32540231
Unigene0081413	chr2	32533050	32540231
Unigene0004880	chr2	32557039	32561337
Unigene0045236	chr2	32590074	32593600
Unigene0064183	chr2	32592331	32592586
Unigene0047191	chr2	32647038	32647318
Unigene0042616	chr2	32672451	32682362
Unigene0055394	chr2	32684672	32685931
Unigene0044923	chr2	32759268	32765241
Unigene0009170	chr2	32766378	32769302
Unigene0077931	chr2	32781330	32782411
Unigene0005584	chr2	32810420	32815761
Unigene0005585	chr2	32810420	32815761
Unigene0007130	chr2	32845036	32846899
Unigene0021007	chr2	32847490	32849083
Unigene0021010	chr2	32847490	32849083
Unigene0021012	chr2	32847490	32849083
Unigene0021013	chr2	32847490	32849083
Unigene0027007	chr2	32882773	32894034
Unigene0027008	chr2	32882773	32952173
Unigene0027009	chr2	32882773	32952173
Unigene0027010	chr2	32882773	32894034
Unigene0027011	chr2	32882773	32894034
Unigene0027012	chr2	32882773	32952173
Unigene0027013	chr2	32882773	32952173
Unigene0027014	chr2	32882773	32894034
Unigene0027008	chr2	32883419	32894034
Unigene0027009	chr2	32883419	32894034
Unigene0027012	chr2	32883419	32894034
Unigene0027013	chr2	32883419	32894034
Unigene0003362	chr2	32913509	32915305
Unigene0027007	chr2	32940954	32952173
Unigene0027010	chr2	32940954	32952173
Unigene0027011	chr2	32940954	32952173
Unigene0027014	chr2	32940954	32952173
Unigene0003362	chr2	32971507	32973303
Unigene0072168	chr2	32983664	32983829
Unigene0009112	chr2	33026212	33031152
Unigene0009111	chr2	33028534	33031152
Unigene0005803	chr2	33034766	33046833
Unigene0056582	chr2	33042968	33043131
Unigene0022203	chr2	33077138	33081381
Unigene0022204	chr2	33077138	33081381
Unigene0022205	chr2	33077138	33081381
Unigene0022206	chr2	33077138	33081381
Unigene0022207	chr2	33077138	33081381
Unigene0022208	chr2	33077138	33081381
Unigene0034591	chr2	33157027	33158723
Unigene0034596	chr2	33158869	33159543
Unigene0034593	chr2	33160084	33185199
Unigene0034593	chr2	33160271	33161893
Unigene0034592	chr2	33162364	33186952
Unigene0034591	chr2	33169255	33170924
Unigene0034596	chr2	33170952	33171705
Unigene0034593	chr2	33172270	33174386
Unigene0034590	chr2	33174529	33187114
Unigene0034591	chr2	33179849	33181744
Unigene0034596	chr2	33181772	33182527
Unigene0034590	chr2	33185343	33186903
Unigene0071434	chr2	33213547	33213796
Unigene0054292	chr2	33216901	33218181
Unigene0077079	chr2	33218557	33218721
Unigene0075728	chr2	33220422	33220691
Unigene0046453	chr2	33252198	33255188
Unigene0005923	chr2	33255171	33255934
Unigene0053632	chr2	33382969	33384618
Unigene0010519	chr2	33416465	33421606
Unigene0010521	chr2	33416465	33421606
Unigene0042910	chr2	33424576	33428988
Unigene0008533	chr2	33429986	33433468
Unigene0008534	chr2	33429986	33433271
Unigene0008535	chr2	33429986	33433468
Unigene0056741	chr2	33434407	33434698
Unigene0053632	chr2	33495585	33497919
Unigene0000656	chr2	33497902	33500087
Unigene0053632	chr2	33517034	33519366
Unigene0000656	chr2	33519349	33521460
Unigene0046602	chr2	33545003	33547371
Unigene0043373	chr2	33582778	33592341
Unigene0041889	chr2	33683443	33686921
Unigene0042227	chr2	33725660	33728667
Unigene0048814	chr2	33733602	33734795
Unigene0016717	chr2	33746806	33749850
Unigene0047389	chr2	33756769	33757651
Unigene0001029	chr2	33774953	33775612
Unigene0041476	chr2	33860116	33872758
Unigene0045654	chr2	33894664	33903413
Unigene0008082	chr2	33918950	33920818
Unigene0008083	chr2	33918950	33920818
Unigene0011373	chr2	33930520	33930819
Unigene0011770	chr2	33932992	33939699
Unigene0011771	chr2	33932992	33939699
Unigene0041763	chr2	33943977	33948427
Unigene0048875	chr2	33954603	33956554
Unigene0027203	chr2	33956935	33964492
Unigene0027204	chr2	33956935	33964557
Unigene0061030	chr2	33996012	33997105
Unigene0036235	chr2	34047359	34048995
Unigene0036249	chr2	34047359	34048995
Unigene0036245	chr2	34048608	34048952
Unigene0036236	chr2	34052731	34053327
Unigene0036251	chr2	34052731	34054378
Unigene0031157	chr2	34152368	34156769
Unigene0042826	chr2	34161464	34166681

## Sheet: 3
Unigene0007287	chr3	154168	157038
Unigene0018443	chr3	195674	198035
Unigene0018445	chr3	195674	198035
Unigene0018444	chr3	213713	215043
Unigene0085502	chr3	311783	319728
Unigene0009509	chr3	319014	319728
Unigene0042868	chr3	322641	326697
Unigene0010391	chr3	339729	345672
Unigene0010392	chr3	339729	345672
Unigene0010393	chr3	339729	345672
Unigene0010394	chr3	339729	345672
Unigene0003740	chr3	387788	396440
Unigene0084029	chr3	403237	408215
Unigene0051171	chr3	428692	433399
Unigene0010542	chr3	465971	467218
Unigene0024637	chr3	466660	468567
Unigene0024639	chr3	468554	472496
Unigene0008779	chr3	508947	515522
Unigene0018818	chr3	519439	519863
Unigene0018819	chr3	519644	519863
Unigene0008950	chr3	550676	562446
Unigene0003908	chr3	627586	631893
Unigene0003909	chr3	627586	631893
Unigene0042718	chr3	981093	981840
Unigene0051680	chr3	1070891	1071584
Unigene0045846	chr3	1147089	1149609
Unigene0045551	chr3	1163047	1169391
Unigene0043491	chr3	1191986	1196420
Unigene0044515	chr3	1200937	1206637
Unigene0013702	chr3	1207603	1209592
Unigene0052006	chr3	1209569	1210360
Unigene0086076	chr3	1210344	1214335
Unigene0038186	chr3	1314688	1314846
Unigene0038183	chr3	1316217	1316447
Unigene0018444	chr3	1329200	1330281
Unigene0076435	chr3	1371840	1372197
Unigene0086356	chr3	1390571	1394709
Unigene0032493	chr3	1422513	1433668
Unigene0032494	chr3	1422513	1433668
Unigene0032496	chr3	1422513	1433668
Unigene0032497	chr3	1422513	1433668
Unigene0032498	chr3	1422513	1433668
Unigene0032501	chr3	1422513	1433668
Unigene0032502	chr3	1422513	1433668
Unigene0032505	chr3	1422513	1433668
Unigene0032506	chr3	1422513	1433668
Unigene0032510	chr3	1422513	1433668
Unigene0032512	chr3	1422513	1433668
Unigene0032513	chr3	1422513	1433668
Unigene0032518	chr3	1422513	1433668
Unigene0032519	chr3	1422513	1433668
Unigene0032520	chr3	1422513	1433668
Unigene0032523	chr3	1422513	1433668
Unigene0032495	chr3	1427149	1433668
Unigene0032499	chr3	1427149	1429855
Unigene0032504	chr3	1427149	1429855
Unigene0032507	chr3	1427149	1433668
Unigene0032508	chr3	1427149	1433668
Unigene0032509	chr3	1427149	1433668
Unigene0032503	chr3	1439223	1441415
Unigene0046982	chr3	1585835	1586512
Unigene0022120	chr3	1822176	1833094
Unigene0022121	chr3	1822176	1833094
Unigene0022123	chr3	1822176	1828880
Unigene0032928	chr3	2063462	2071694
Unigene0042244	chr3	2193935	2199603
Unigene0022419	chr3	2246279	2251284
Unigene0022420	chr3	2246279	2250303
Unigene0022422	chr3	2246279	2253065
Unigene0022423	chr3	2246279	2251284
Unigene0022424	chr3	2246279	2253065
Unigene0043604	chr3	2279504	2285020
Unigene0063721	chr3	2280801	2281336
Unigene0050393	chr3	2341278	2341610
Unigene0021299	chr3	2469876	2473871
Unigene0021300	chr3	2469876	2474122
Unigene0053207	chr3	2529438	2530679
Unigene0008205	chr3	2541309	2542127
Unigene0067777	chr3	2634316	2634550
Unigene0076356	chr3	2634678	2634835
Unigene0079026	chr3	2650698	2650902
Unigene0081971	chr3	2969403	2973661
Unigene0045425	chr3	2991645	2993868
Unigene0007773	chr3	2995297	3000224
Unigene0050612	chr3	3005812	3006741
Unigene0011780	chr3	3006731	3012263
Unigene0040917	chr3	3072724	3074536
Unigene0039079	chr3	3099673	3102026
Unigene0039078	chr3	3102843	3104448
Unigene0035680	chr3	3135386	3135941
Unigene0023157	chr3	3139564	3151320
Unigene0007979	chr3	3216728	3221691
Unigene0007980	chr3	3216728	3221691
Unigene0046019	chr3	3296649	3310453
Unigene0056924	chr3	3301413	3301654
Unigene0069590	chr3	3304057	3304291
Unigene0028352	chr3	3320932	3322852
Unigene0001848	chr3	3573323	3578090
Unigene0050859	chr3	3578132	3578294
Unigene0014074	chr3	3585973	3591933
Unigene0020082	chr3	3629533	3636954
Unigene0020083	chr3	3629533	3638318
Unigene0007940	chr3	4005889	4007873
Unigene0071369	chr3	4306621	4306870
Unigene0069534	chr3	4306866	4307291
Unigene0075161	chr3	4326605	4326930
Unigene0075392	chr3	4326942	4327167
Unigene0067440	chr3	4327526	4327794
Unigene0067549	chr3	4327882	4328197
Unigene0026370	chr3	4509502	4511768
Unigene0042388	chr3	4553103	4558177
Unigene0047697	chr3	4555317	4556045
Unigene0021368	chr3	4559006	4560128
Unigene0021369	chr3	4559006	4560128
Unigene0036776	chr3	4560112	4562673
Unigene0040943	chr3	4575148	4575367
Unigene0082905	chr3	4688293	4697229
Unigene0086346	chr3	4688293	4697229
Unigene0086980	chr3	4688293	4697229
Unigene0087033	chr3	4688293	4697229
Unigene0077578	chr3	4707835	4708003
Unigene0077578	chr3	4760230	4760387
Unigene0037641	chr3	4808525	4814149
Unigene0009487	chr3	4809464	4811242
Unigene0009488	chr3	4809464	4811242
Unigene0035692	chr3	4811220	4813138
Unigene0035668	chr3	4813378	4813712
Unigene0030845	chr3	4967485	5013394
Unigene0030847	chr3	4967867	4968179
Unigene0030845	chr3	4976082	5026207
Unigene0030847	chr3	4976450	4976762
Unigene0059448	chr3	4977848	4978265
Unigene0030845	chr3	5005839	5007973
Unigene0030847	chr3	5006195	5011951
Unigene0059448	chr3	5007604	5008021
Unigene0030847	chr3	5024492	5024800
Unigene0030847	chr3	5325851	5351813
Unigene0030847	chr3	5325971	5326156
Unigene0030847	chr3	5372188	5372493
Unigene0030847	chr3	5377478	5377650
Unigene0040943	chr3	5489136	5489370
Unigene0040939	chr3	5489259	5489427
Unigene0038309	chr3	5632700	5632843
Unigene0076968	chr3	5804335	5804541
Unigene0066909	chr3	5805657	5807863
Unigene0084875	chr3	6488626	6496640
Unigene0007868	chr3	6611808	6617539
Unigene0007869	chr3	6611808	6617539
Unigene0059155	chr3	6803645	6804224
Unigene0066569	chr3	6804239	6805181
Unigene0006498	chr3	7073701	7104039
Unigene0026274	chr3	7196392	7197570
Unigene0004703	chr3	7230486	7234734
Unigene0026274	chr3	7269020	7270242
Unigene0004703	chr3	7303208	7307454
Unigene0043532	chr3	7338619	7344714
Unigene0004248	chr3	7359308	7361879
Unigene0087108	chr3	7433458	7434555
Unigene0008826	chr3	7696508	7699762
Unigene0002571	chr3	7944405	7945639
Unigene0057844	chr3	7945617	7946112
Unigene0001649	chr3	7946088	7947488
Unigene0038309	chr3	8019785	8019935
Unigene0043881	chr3	8165764	8175515
Unigene0042712	chr3	8187116	8201907
Unigene0046672	chr3	8305445	8308570
Unigene0043588	chr3	8428703	8429980
Unigene0069668	chr3	8710180	8710821
Unigene0067501	chr3	8710804	8711296
Unigene0061550	chr3	8712108	8713878
Unigene0021969	chr3	8715773	8721756
Unigene0021970	chr3	8715773	8717779
Unigene0021973	chr3	8715773	8721756
Unigene0021967	chr3	8718912	8721756
Unigene0021968	chr3	8718912	8721756
Unigene0021971	chr3	8722315	8725638
Unigene0042452	chr3	8908853	8912079
Unigene0041611	chr3	8912082	8914825
Unigene0041918	chr3	8915848	8917144
Unigene0045758	chr3	9101809	9108371
Unigene0082472	chr3	9225899	9237767
Unigene0047985	chr3	9249867	9251810
Unigene0044868	chr3	9295491	9295693
Unigene0047144	chr3	9300417	9301012
Unigene0054599	chr3	9489140	9489278
Unigene0070672	chr3	9499327	9499535
Unigene0043911	chr3	9523160	9525880
Unigene0020224	chr3	9566706	9570920
Unigene0020223	chr3	9567973	9570920
Unigene0042626	chr3	9572804	9577652
Unigene0040465	chr3	9633517	9682593
Unigene0040465	chr3	9644125	9644904
Unigene0005307	chr3	9743258	9747250
Unigene0005308	chr3	9743258	9747250
Unigene0056405	chr3	9744814	9745516
Unigene0002935	chr3	9763183	9767325
Unigene0041959	chr3	10244842	10252015
Unigene0006373	chr3	10337681	10337822
Unigene0006373	chr3	10407927	10408058
Unigene0015003	chr3	10415442	10429616
Unigene0015004	chr3	10415442	10429616
Unigene0084530	chr3	10433404	10443696
Unigene0003065	chr3	10461764	10465120
Unigene0076070	chr3	10506612	10506849
Unigene0071369	chr3	10506867	10507184
Unigene0069534	chr3	10507165	10507644
Unigene0058264	chr3	10507833	10508942
Unigene0075161	chr3	10509148	10509483
Unigene0075392	chr3	10509489	10509729
Unigene0067440	chr3	10510160	10510434
Unigene0038309	chr3	10545842	10545985
Unigene0038309	chr3	10552605	10552748
Unigene0006373	chr3	10553236	10553366
Unigene0004496	chr3	10663989	10677663
Unigene0034089	chr3	10678338	10678597
Unigene0007870	chr3	10712639	10712956
Unigene0045974	chr3	10712979	10717262
Unigene0046478	chr3	10829076	10850386
Unigene0001875	chr3	10832835	10832996
Unigene0046478	chr3	10842877	10850282
Unigene0034057	chr3	10983235	10983640
Unigene0034059	chr3	10983235	10983648
Unigene0034060	chr3	10983440	10983640
Unigene0034058	chr3	10983786	10984046
Unigene0087034	chr3	10984023	10986408
Unigene0034056	chr3	10985755	10986408
Unigene0006884	chr3	11019816	11026638
Unigene0006885	chr3	11019816	11026661
Unigene0056514	chr3	11103602	11103728
Unigene0007069	chr3	11224818	11228242
Unigene0049780	chr3	11681931	11682428
Unigene0078684	chr3	11696474	11696628
Unigene0024554	chr3	11729475	11730642
Unigene0024555	chr3	11730642	11733215
Unigene0024556	chr3	11730642	11734356
Unigene0049230	chr3	11734332	11734686
Unigene0039321	chr3	11739822	11744043
Unigene0020045	chr3	11746986	11749387
Unigene0010623	chr3	11752955	11755055
Unigene0047923	chr3	11755203	11755927
Unigene0038309	chr3	11762279	11762422
Unigene0079147	chr3	11927437	11928326
Unigene0045411	chr3	12587592	12591291
Unigene0069466	chr3	12704905	12705217
Unigene0061287	chr3	12804212	12804378
Unigene0009329	chr3	12875037	12885497
Unigene0009328	chr3	12875904	12885497
Unigene0042531	chr3	12894223	12896116
Unigene0045025	chr3	12896437	12897052
Unigene0045109	chr3	12897066	12897901
Unigene0044310	chr3	12899688	12900361
Unigene0044816	chr3	12901881	12902695
Unigene0040213	chr3	12974248	12974416
Unigene0086237	chr3	13601620	13615402
Unigene0038309	chr3	13771545	13771688
Unigene0038309	chr3	13778090	13778233
Unigene0080813	chr3	13968596	13968821
Unigene0086014	chr3	13975554	13985751
Unigene0047119	chr3	13985733	13987807
Unigene0010644	chr3	13987470	13989058
Unigene0042278	chr3	14726942	14732565
Unigene0010700	chr3	14740057	14748553
Unigene0010701	chr3	14740057	14748553
Unigene0010702	chr3	14740057	14748553
Unigene0010703	chr3	14740057	14748553
Unigene0010423	chr3	14823550	14830901
Unigene0003741	chr3	15031453	15035570
Unigene0009487	chr3	15042058	15043839
Unigene0009488	chr3	15042058	15043839
Unigene0035692	chr3	15043817	15045700
Unigene0035668	chr3	15045940	15046228
Unigene0007581	chr3	15050363	15057698
Unigene0013002	chr3	15061228	15061583
Unigene0025826	chr3	15061683	15062172
Unigene0082743	chr3	15062154	15062721
Unigene0016190	chr3	15062634	15063226
Unigene0016191	chr3	15062634	15063184
Unigene0080054	chr3	15063790	15063999
Unigene0036991	chr3	15421875	15427039
Unigene0052516	chr3	15426287	15426543
Unigene0006917	chr3	15464399	15468356
Unigene0005309	chr3	15485886	15489968
Unigene0047933	chr3	15489947	15490487
Unigene0005309	chr3	15506398	15510865
Unigene0047933	chr3	15510844	15511384
Unigene0035295	chr3	15608937	15694957
Unigene0047369	chr3	15921045	15923835
Unigene0009261	chr3	15941276	15946736
Unigene0009262	chr3	15941276	15946692
Unigene0009263	chr3	15941276	15946736
Unigene0009264	chr3	15941276	15946692
Unigene0046624	chr3	15956083	15963237
Unigene0043824	chr3	15969073	15972124
Unigene0030087	chr3	16008966	16009908
Unigene0029348	chr3	16018954	16025611
Unigene0030847	chr3	16111082	16111393
Unigene0045825	chr3	16114193	16115450
Unigene0011019	chr3	16396811	16403436
Unigene0011020	chr3	16396811	16403436
Unigene0011097	chr3	16411094	16411936
Unigene0011098	chr3	16411094	16412798
Unigene0043332	chr3	16417625	16429789
Unigene0017322	chr3	16583444	16586901
Unigene0083008	chr3	16583444	16586901
Unigene0004272	chr3	16860884	16865743
Unigene0040644	chr3	16871108	16892805
Unigene0040646	chr3	16871108	16892805
Unigene0040649	chr3	16871108	16892805
Unigene0040651	chr3	16871108	16892805
Unigene0040654	chr3	16871108	16892805
Unigene0040660	chr3	16871108	16892805
Unigene0040661	chr3	16871108	16892805
Unigene0040673	chr3	16871108	16892805
Unigene0081375	chr3	16871108	16892805
Unigene0081376	chr3	16871108	16892805
Unigene0040642	chr3	16872263	16892805
Unigene0040668	chr3	16872263	16892805
Unigene0040685	chr3	16872263	16892805
Unigene0040640	chr3	16872618	16892805
Unigene0040645	chr3	16872618	16892805
Unigene0040648	chr3	16872618	16892805
Unigene0040655	chr3	16872618	16892805
Unigene0040667	chr3	16872618	16892805
Unigene0040672	chr3	16872618	16892805
Unigene0040681	chr3	16872618	16892805
Unigene0040684	chr3	16872618	16892805
Unigene0084984	chr3	16872618	16892805
Unigene0040653	chr3	16872787	16892805
Unigene0040664	chr3	16872787	16892805
Unigene0040682	chr3	16872787	16892805
Unigene0081377	chr3	16872787	16890875
Unigene0084985	chr3	16872787	16892805
Unigene0040641	chr3	16873437	16875391
Unigene0040652	chr3	16873437	16892805
Unigene0040662	chr3	16873437	16892805
Unigene0040670	chr3	16873437	16892805
Unigene0001466	chr3	16879095	16879251
Unigene0014666	chr3	16883769	16884955
Unigene0014667	chr3	16883769	16886557
Unigene0073928	chr3	17122222	17122410
Unigene0047356	chr3	17184509	17189659
Unigene0046328	chr3	17214797	17220319
Unigene0005179	chr3	17324566	17327464
Unigene0005180	chr3	17324566	17327672
Unigene0047772	chr3	17329472	17330077
Unigene0038758	chr3	17395193	17395508
Unigene0038758	chr3	17410396	17410723
Unigene0028870	chr3	17530344	17532160
Unigene0046008	chr3	17536486	17537630
Unigene0042568	chr3	17553816	17554673
Unigene0008539	chr3	17555026	17560233
Unigene0008540	chr3	17555026	17560233
Unigene0043676	chr3	17575952	17580327
Unigene0076070	chr3	18278317	18278554
Unigene0042405	chr3	18676801	18681599
Unigene0042385	chr3	18698285	18702856
Unigene0017900	chr3	18716550	18717448
Unigene0017902	chr3	18716550	18717448
Unigene0012379	chr3	18758515	18765359
Unigene0044891	chr3	18780993	18785139
Unigene0011505	chr3	18789811	18792534
Unigene0001729	chr3	18792602	18793256
Unigene0001730	chr3	18792602	18793256
Unigene0048930	chr3	18793234	18793858
Unigene0015090	chr3	18855777	18860761
Unigene0015089	chr3	18858284	18860761
Unigene0043782	chr3	18860742	18862759
Unigene0003559	chr3	18884060	18884469
Unigene0042391	chr3	18900331	18907711
Unigene0044806	chr3	18914998	18922968
Unigene0023214	chr3	19003733	19004848
Unigene0061575	chr3	19004685	19004915
Unigene0037264	chr3	19071609	19071929
Unigene0004099	chr3	19072932	19080566
Unigene0043870	chr3	19096187	19100167
Unigene0004359	chr3	19103950	19106709
Unigene0004360	chr3	19103950	19106709
Unigene0005058	chr3	19160034	19160971
Unigene0048321	chr3	19197316	19200359
Unigene0054494	chr3	19674780	19674919
Unigene0044685	chr3	19712014	19717399
Unigene0044947	chr3	19719131	19719636
Unigene0044595	chr3	19719619	19721589
Unigene0021083	chr3	19721568	19723558
Unigene0021085	chr3	19721568	19721831
Unigene0086633	chr3	19781891	19786333
Unigene0086634	chr3	19781891	19786333
Unigene0078946	chr3	19783535	19783766
Unigene0048052	chr3	19786413	19787907
Unigene0007406	chr3	19900436	19907935
Unigene0002961	chr3	19935151	19937229
Unigene0002962	chr3	19935151	19937229
Unigene0021473	chr3	20144422	20145102
Unigene0012464	chr3	20153760	20165668
Unigene0012463	chr3	20157323	20165668
Unigene0052953	chr3	20159085	20160368
Unigene0004195	chr3	20164161	20184210
Unigene0004196	chr3	20164161	20184210
Unigene0051779	chr3	20201952	20209777
Unigene0036670	chr3	20228398	20238712
Unigene0036670	chr3	20252710	20253056
Unigene0036670	chr3	20262132	20262475
Unigene0036670	chr3	20271013	20271368
Unigene0013041	chr3	20311677	20317537
Unigene0013042	chr3	20312952	20317537
Unigene0082342	chr3	20326171	20331584
Unigene0043107	chr3	20380202	20383877
Unigene0053950	chr3	20382614	20382831
Unigene0042338	chr3	20390117	20390502
Unigene0008085	chr3	20404436	20404667
Unigene0051402	chr3	20441017	20445060
Unigene0055630	chr3	20458841	20459179
Unigene0053080	chr3	20459157	20460290
Unigene0055807	chr3	20459913	20460733
Unigene0056488	chr3	20460713	20461333
Unigene0056263	chr3	20515775	20516178
Unigene0028639	chr3	20516163	20520557
Unigene0023537	chr3	20597442	20602487
Unigene0023538	chr3	20601151	20602487
Unigene0053460	chr3	20636973	20637342
Unigene0045144	chr3	20701450	20710171
Unigene0041282	chr3	20713390	20720739
Unigene0053725	chr3	20719227	20719583
Unigene0059573	chr3	20744715	20745033
Unigene0044194	chr3	20745128	20750683
Unigene0041727	chr3	20779994	20783651
Unigene0007413	chr3	20814164	20823463
Unigene0071275	chr3	20909387	20910509
Unigene0059119	chr3	20910059	20911631
Unigene0016324	chr3	20941468	20944116
Unigene0037506	chr3	21359644	21359907
Unigene0043413	chr3	21559912	21562761
Unigene0058458	chr3	21561570	21561854
Unigene0031688	chr3	21575560	21581400
Unigene0081962	chr3	21575560	21581400
Unigene0085560	chr3	21575560	21581400
Unigene0077767	chr3	21589548	21589933
Unigene0042282	chr3	21602709	21608960
Unigene0047341	chr3	21629278	21630577
Unigene0024469	chr3	21634706	21643012
Unigene0024470	chr3	21634706	21643012
Unigene0024473	chr3	21634706	21656713
Unigene0024474	chr3	21634706	21656713
Unigene0047341	chr3	21645090	21647035
Unigene0024469	chr3	21650594	21658824
Unigene0024470	chr3	21650594	21658824
Unigene0048986	chr3	21660322	21663874
Unigene0038758	chr3	21668043	21668315
Unigene0019402	chr3	21689153	21692033
Unigene0018813	chr3	21731965	21735988
Unigene0010014	chr3	21753873	21765068
Unigene0064345	chr3	21767520	21767910
Unigene0011180	chr3	21767898	21769782
Unigene0060534	chr3	21797555	21801092
Unigene0048808	chr3	21808517	21810018
Unigene0010633	chr3	21823963	21835618
Unigene0010634	chr3	21823963	21835618
Unigene0002468	chr3	21890182	21893096
Unigene0029822	chr3	21935558	21938251
Unigene0029820	chr3	21935908	21938867
Unigene0004490	chr3	22031316	22045657
Unigene0042722	chr3	22052508	22057642
Unigene0041619	chr3	22068474	22071358
Unigene0038966	chr3	22121651	22127188
Unigene0038972	chr3	22122023	22127188
Unigene0038977	chr3	22122023	22127188
Unigene0011615	chr3	22129053	22134414
Unigene0011616	chr3	22129226	22134414
Unigene0044629	chr3	22181672	22186366
Unigene0006227	chr3	22187412	22192286
Unigene0005563	chr3	22197142	22202907
Unigene0049598	chr3	22236515	22237010
Unigene0046900	chr3	22237975	22248088
Unigene0052385	chr3	22252288	22252891
Unigene0046222	chr3	22269325	22277320
Unigene0025034	chr3	22301725	22304065
Unigene0044945	chr3	22311104	22314296
Unigene0063362	chr3	22440222	22440723
Unigene0005576	chr3	22494442	22497377
Unigene0043677	chr3	22522476	22523923
Unigene0044617	chr3	22524787	22525552
Unigene0043235	chr3	22525974	22526456
Unigene0043456	chr3	22526623	22527355
Unigene0042760	chr3	22527616	22528145
Unigene0043155	chr3	22528379	22528635
Unigene0041458	chr3	22530371	22530923
Unigene0015152	chr3	22542700	22544639
Unigene0015153	chr3	22543849	22544639
Unigene0077263	chr3	22714413	22714620
Unigene0015366	chr3	22718717	22726840
Unigene0015367	chr3	22718717	22726840
Unigene0043805	chr3	22728378	22732698
Unigene0076295	chr3	22742662	22742892
Unigene0007204	chr3	22777127	22778619
Unigene0033030	chr3	22779890	22790048
Unigene0044957	chr3	22840677	22846353
Unigene0008643	chr3	22860807	22861610
Unigene0008644	chr3	22860807	22862070
Unigene0008645	chr3	22860807	22862070
Unigene0064131	chr3	23062615	23062821
Unigene0008782	chr3	23143221	23149576
Unigene0039651	chr3	23157125	23157341
Unigene0050280	chr3	23177444	23177850
Unigene0041304	chr3	23192372	23197719
Unigene0038423	chr3	23208559	23208702
Unigene0013640	chr3	23211015	23213117
Unigene0013642	chr3	23211015	23213117
Unigene0068420	chr3	23219167	23219749
Unigene0055457	chr3	23225064	23225411
Unigene0075258	chr3	23232831	23233103
Unigene0083760	chr3	23280839	23285445
Unigene0009732	chr3	23297981	23298226
Unigene0038451	chr3	23335279	23341976
Unigene0042622	chr3	23343637	23345373
Unigene0001365	chr3	23439621	23440877
Unigene0046054	chr3	23515463	23521226
Unigene0004478	chr3	23522202	23523572
Unigene0044348	chr3	23526705	23527081
Unigene0009966	chr3	23614847	23617464
Unigene0046571	chr3	23617114	23617903
Unigene0071067	chr3	23629715	23630168
Unigene0010299	chr3	23634443	23636712
Unigene0010300	chr3	23634443	23636712
Unigene0035864	chr3	23664262	23665863
Unigene0029332	chr3	23667497	23682968
Unigene0029333	chr3	23667497	23682968
Unigene0029334	chr3	23667497	23682968
Unigene0029337	chr3	23667497	23682968
Unigene0029338	chr3	23667497	23682968
Unigene0029339	chr3	23667497	23682968
Unigene0029340	chr3	23667497	23677640
Unigene0029343	chr3	23667497	23682968
Unigene0081386	chr3	23667497	23682968
Unigene0081387	chr3	23667497	23677640
Unigene0081944	chr3	23694684	23701274
Unigene0015664	chr3	23724081	23735058
Unigene0015665	chr3	23724081	23735058
Unigene0015666	chr3	23724081	23735058
Unigene0015667	chr3	23724081	23735058
Unigene0015668	chr3	23724081	23735058
Unigene0015669	chr3	23724081	23735058
Unigene0015670	chr3	23724081	23735058
Unigene0015671	chr3	23724081	23735058
Unigene0064018	chr3	23731508	23731796
Unigene0048155	chr3	23751200	23751693
Unigene0021849	chr3	23823696	23825095
Unigene0049261	chr3	23830123	23836648
Unigene0005260	chr3	23890129	23894685
Unigene0044189	chr3	23895870	23899485
Unigene0048176	chr3	23942465	23947713
Unigene0011740	chr3	23949261	23951052
Unigene0050033	chr3	23970902	23974205
Unigene0033597	chr3	24177004	24178831
Unigene0043424	chr3	24179339	24181080
Unigene0000548	chr3	24185736	24186259
Unigene0000547	chr3	24185976	24186259
Unigene0024369	chr3	24186839	24191181
Unigene0024371	chr3	24186839	24191181
Unigene0083396	chr3	24186839	24192389
Unigene0084529	chr3	24186839	24192389
Unigene0040466	chr3	24196317	24197600
Unigene0054415	chr3	24200109	24200799
Unigene0060455	chr3	24200778	24201243
Unigene0041911	chr3	24211086	24212310
Unigene0083303	chr3	24217141	24221400
Unigene0016533	chr3	24217589	24221400
Unigene0046601	chr3	24302302	24308193
Unigene0044642	chr3	24318646	24323051
Unigene0008912	chr3	24376106	24383178
Unigene0008913	chr3	24376106	24383178
Unigene0047835	chr3	24377667	24377865
Unigene0060967	chr3	24418308	24419032
Unigene0045356	chr3	24479233	24486408
Unigene0053918	chr3	24513265	24514599
Unigene0030541	chr3	24517533	24519811
Unigene0030550	chr3	24517533	24520527
Unigene0030552	chr3	24517533	24520527
Unigene0031623	chr3	24535461	24547892
Unigene0083446	chr3	24535461	24536493
Unigene0048223	chr3	24547231	24547695
Unigene0000547	chr3	24558439	24558722
Unigene0000548	chr3	24558439	24559016
Unigene0044857	chr3	24580235	24582656
Unigene0086471	chr3	24623217	24629490
Unigene0086473	chr3	24623217	24629490
Unigene0022696	chr3	24624809	24629490
Unigene0086472	chr3	24624809	24629490
Unigene0015143	chr3	24658837	24661842
Unigene0015146	chr3	24658837	24661842
Unigene0003790	chr3	24675152	24679163
Unigene0003791	chr3	24675152	24679553
Unigene0007731	chr3	24689666	24694859
Unigene0007732	chr3	24689666	24694859
Unigene0042323	chr3	24729876	24740122
Unigene0003151	chr3	24752329	24819304
Unigene0039738	chr3	24894149	24894936
Unigene0085905	chr3	25189808	25192001
Unigene0019295	chr3	25189811	25192001
Unigene0084269	chr3	25196413	25200087
Unigene0043300	chr3	25202084	25205306
Unigene0049152	chr3	25237627	25247947
Unigene0042944	chr3	25253885	25258358
Unigene0049845	chr3	25260190	25263078
Unigene0003479	chr3	25272444	25274541
Unigene0025791	chr3	25275621	25283644
Unigene0025793	chr3	25275621	25283644
Unigene0007292	chr3	25286456	25287028
Unigene0007291	chr3	25286559	25287028
Unigene0051252	chr3	25287006	25303396
Unigene0051252	chr3	25302959	25303267
Unigene0032714	chr3	25361244	25361509
Unigene0013744	chr3	25384950	25388299
Unigene0013745	chr3	25384950	25388299
Unigene0013746	chr3	25384950	25388018
Unigene0013747	chr3	25384950	25388018
Unigene0013748	chr3	25384950	25388299
Unigene0015542	chr3	25392058	25393887
Unigene0015543	chr3	25392058	25393737
Unigene0015544	chr3	25392058	25393887
Unigene0044173	chr3	25435958	25440125
Unigene0045149	chr3	25440105	25440997
Unigene0004645	chr3	25480379	25484960
Unigene0005092	chr3	25528612	25529515
Unigene0026496	chr3	25538779	25554611
Unigene0026498	chr3	25538779	25554611
Unigene0026497	chr3	25552137	25554611
Unigene0009908	chr3	25595950	25616632
Unigene0044880	chr3	25674437	25680114
Unigene0031707	chr3	25700341	25706130
Unigene0031708	chr3	25700341	25706130
Unigene0014266	chr3	25720524	25720771
Unigene0003729	chr3	25721021	25721788
Unigene0081449	chr3	25729072	25735587
Unigene0039516	chr3	25737907	25740636
Unigene0039517	chr3	25739734	25740636
Unigene0010576	chr3	25740673	25742593
Unigene0010578	chr3	25740673	25742945
Unigene0049322	chr3	25759428	25760034
Unigene0051142	chr3	25761488	25763083
Unigene0081955	chr3	25783065	25788458
Unigene0030006	chr3	25792857	25824750
Unigene0084902	chr3	25793530	25824750
Unigene0073514	chr3	25794592	25794783
Unigene0019604	chr3	25837011	25843295
Unigene0019605	chr3	25837011	25843295
Unigene0019606	chr3	25837011	25843295
Unigene0019607	chr3	25837011	25843295
Unigene0019608	chr3	25837011	25843295
Unigene0019609	chr3	25837011	25843295
Unigene0019610	chr3	25837011	25843295
Unigene0019611	chr3	25837011	25843295
Unigene0024508	chr3	25847870	25851956
Unigene0024509	chr3	25847870	25851956
Unigene0085040	chr3	25847870	25851956
Unigene0060957	chr3	25850729	25851086
Unigene0008593	chr3	25900282	25901989
Unigene0001927	chr3	25912855	25916596
Unigene0021469	chr3	25968940	25994609
Unigene0021470	chr3	25968940	25994609
Unigene0021471	chr3	25968940	25994507
Unigene0021472	chr3	25968940	25994507
Unigene0046452	chr3	26075726	26078775
Unigene0085337	chr3	26093246	26098867
Unigene0039492	chr3	26135599	26138372
Unigene0039495	chr3	26135599	26145162
Unigene0084718	chr3	26296508	26297678
Unigene0045665	chr3	26302443	26303367
Unigene0042758	chr3	26347536	26348452
Unigene0004440	chr3	26348453	26349652
Unigene0017613	chr3	26353830	26357568
Unigene0007387	chr3	26377828	26380715
Unigene0066685	chr3	26488002	26488956
Unigene0020733	chr3	26505841	26506821
Unigene0010124	chr3	26548827	26552758
Unigene0004604	chr3	26567717	26570325
Unigene0004605	chr3	26567717	26570325
Unigene0004229	chr3	26573466	26579532
Unigene0054607	chr3	26591656	26593719
Unigene0005114	chr3	26619453	26624204
Unigene0005115	chr3	26619453	26624204
Unigene0043224	chr3	26628028	26631787
Unigene0077643	chr3	26635088	26635929
Unigene0022825	chr3	26643051	26649737
Unigene0022826	chr3	26643051	26649737
Unigene0022827	chr3	26643051	26649709
Unigene0022830	chr3	26643051	26649709
Unigene0002755	chr3	26654360	26656739
Unigene0048219	chr3	26656716	26657538
Unigene0020501	chr3	26666863	26671901
Unigene0020503	chr3	26666863	26671901
Unigene0020504	chr3	26666863	26671901
Unigene0020502	chr3	26671323	26671940
Unigene0003594	chr3	26678489	26683503
Unigene0003595	chr3	26678489	26683503
Unigene0019705	chr3	26806999	26812199
Unigene0019706	chr3	26806999	26812199
Unigene0026689	chr3	26825605	26829898
Unigene0024657	chr3	26867265	26874858
Unigene0003785	chr3	26882949	26886150
Unigene0020343	chr3	26905841	26907532
Unigene0045188	chr3	26936611	26937959
Unigene0086077	chr3	26941179	26963294
Unigene0086779	chr3	27026378	27029163
Unigene0004022	chr3	27045977	27052124
Unigene0053104	chr3	27092598	27094377
Unigene0017932	chr3	27101719	27107203
Unigene0017931	chr3	27103536	27107203
Unigene0042599	chr3	27136228	27136565
Unigene0043434	chr3	27136550	27136817
Unigene0042599	chr3	27140254	27140591
Unigene0042089	chr3	27140377	27140580
Unigene0043434	chr3	27140575	27140843
Unigene0041389	chr3	27140640	27141302
Unigene0083095	chr3	27171978	27185241
Unigene0083096	chr3	27177087	27185241
Unigene0056553	chr3	27188534	27188941
Unigene0039840	chr3	27199380	27205101
Unigene0010488	chr3	27210020	27225582
Unigene0078135	chr3	27221556	27221698
Unigene0027516	chr3	27230481	27230687
Unigene0027517	chr3	27230552	27234383
Unigene0016336	chr3	27308434	27308589
Unigene0016336	chr3	27314699	27314854
Unigene0049697	chr3	27314708	27314938
Unigene0004758	chr3	27322209	27325918
Unigene0004759	chr3	27322209	27325918
Unigene0014069	chr3	27329104	27343217
Unigene0014070	chr3	27329104	27343217
Unigene0035437	chr3	27343789	27345956
Unigene0039640	chr3	27354725	27355017
Unigene0037597	chr3	27355332	27355878
Unigene0042708	chr3	27381271	27384366
Unigene0012592	chr3	27393702	27400012
Unigene0012593	chr3	27393702	27400012
Unigene0048529	chr3	27409234	27409828
Unigene0045934	chr3	27423138	27425596
Unigene0046922	chr3	27425574	27426403
Unigene0031186	chr3	27429328	27430466
Unigene0052667	chr3	27499349	27506492
Unigene0041371	chr3	27540202	27546284
Unigene0031765	chr3	27565162	27571708
Unigene0016830	chr3	27574047	27585212
Unigene0085210	chr3	27574047	27585212
Unigene0012483	chr3	27576953	27780479
Unigene0042919	chr3	27594025	27606360
Unigene0023536	chr3	27642704	27643157
Unigene0073450	chr3	27643921	27644152
Unigene0044340	chr3	27672678	27673095
Unigene0044065	chr3	27675736	27676758
Unigene0078611	chr3	27703855	27704143
Unigene0047277	chr3	27709059	27709417
Unigene0046110	chr3	27734493	27741160
Unigene0017843	chr3	27753869	27755381
Unigene0044989	chr3	27812313	27815615
Unigene0046442	chr3	27815540	27820870
Unigene0047313	chr3	27856172	27861347
Unigene0045501	chr3	27869936	27874673
Unigene0027045	chr3	27889568	27893469
Unigene0027046	chr3	27889568	27893469
Unigene0027047	chr3	27889568	27893469
Unigene0027048	chr3	27889568	27893469
Unigene0084851	chr3	27895758	27898896
Unigene0004799	chr3	27907948	27908917
Unigene0021573	chr3	27913774	27914485
Unigene0021574	chr3	27913810	27914485
Unigene0005331	chr3	27939506	27943137
Unigene0005332	chr3	27939506	27943137
Unigene0013357	chr3	27952712	27954964
Unigene0045557	chr3	27959927	27964725
Unigene0045034	chr3	27982138	27986998
Unigene0055368	chr3	27985577	27985972
Unigene0077251	chr3	27996410	27996578
Unigene0082461	chr3	28000013	28007099
Unigene0082560	chr3	28000013	28007099
Unigene0083438	chr3	28000013	28007099
Unigene0084794	chr3	28000013	28007099
Unigene0008650	chr3	28029493	28034152
Unigene0008651	chr3	28029493	28034152
Unigene0041326	chr3	28069574	28073753
Unigene0004798	chr3	28075492	28081000
Unigene0047200	chr3	28117624	28117780
Unigene0009006	chr3	28121578	28124067
Unigene0009007	chr3	28121578	28124260
Unigene0009008	chr3	28121845	28124260
Unigene0043933	chr3	28148661	28150554
Unigene0047048	chr3	28157439	28162524
Unigene0025547	chr3	28175486	28184516
Unigene0025548	chr3	28175486	28184516
Unigene0025549	chr3	28175486	28184516
Unigene0025551	chr3	28175486	28184516
Unigene0034717	chr3	28188529	28193316
Unigene0011188	chr3	28227024	28230804
Unigene0011189	chr3	28227024	28230804
Unigene0005836	chr3	28242305	28247124
Unigene0046313	chr3	28247103	28248026
Unigene0048585	chr3	28251928	28252552
Unigene0084357	chr3	28267107	28271286
Unigene0010530	chr3	28333370	28337747
Unigene0010531	chr3	28333370	28337747
Unigene0010532	chr3	28333370	28337747
Unigene0010533	chr3	28333370	28337747
Unigene0044165	chr3	28351323	28352256
Unigene0041793	chr3	28362221	28366572
Unigene0010668	chr3	28377197	28385266
Unigene0010669	chr3	28377197	28385266
Unigene0021222	chr3	28394202	28398394
Unigene0021225	chr3	28394202	28398394
Unigene0077272	chr3	28436993	28437558
Unigene0069587	chr3	28437547	28438113
Unigene0011287	chr3	28449490	28455714
Unigene0050975	chr3	28477247	28478038
Unigene0049387	chr3	28478016	28479488
Unigene0047180	chr3	28483971	28488583
Unigene0083624	chr3	28496283	28498093
Unigene0004501	chr3	28510179	28517285
Unigene0004502	chr3	28510179	28517285
Unigene0020080	chr3	28520681	28524074
Unigene0020081	chr3	28520681	28524074
Unigene0043964	chr3	28537340	28540392
Unigene0037423	chr3	28585899	28589890
Unigene0035497	chr3	28595442	28598527
Unigene0035499	chr3	28595442	28597233
Unigene0033548	chr3	28638286	28638589
Unigene0023246	chr3	28638562	28646842
Unigene0047759	chr3	28695829	28696469
Unigene0048099	chr3	28696448	28697375
Unigene0008628	chr3	28707502	28708227
Unigene0042165	chr3	28710622	28710959
Unigene0029109	chr3	28718123	28723917
Unigene0029112	chr3	28718123	28723917
Unigene0029116	chr3	28718123	28723917
Unigene0029118	chr3	28718123	28723917
Unigene0029119	chr3	28718123	28723917
Unigene0029126	chr3	28718123	28723917
Unigene0029130	chr3	28718123	28723917
Unigene0029138	chr3	28718123	28723917
Unigene0029140	chr3	28718123	28723917
Unigene0029148	chr3	28718123	28723917
Unigene0029149	chr3	28718123	28723917
Unigene0029152	chr3	28718123	28723917
Unigene0029158	chr3	28718123	28723917
Unigene0051359	chr3	28729822	28730165
Unigene0042887	chr3	28732853	28738230
Unigene0006183	chr3	28755606	28756717
Unigene0049010	chr3	28786217	28786558
Unigene0047336	chr3	28790436	28791173
Unigene0006688	chr3	28818423	28826644
Unigene0043026	chr3	28826813	28832963
Unigene0074612	chr3	28839370	28839655
Unigene0044004	chr3	28864631	28879558
Unigene0074851	chr3	28935888	28936198
Unigene0041345	chr3	28973788	28977712
Unigene0077595	chr3	29034623	29035482
Unigene0070983	chr3	29036574	29036839
Unigene0072699	chr3	29039322	29039517
Unigene0004198	chr3	29049651	29053290
Unigene0004199	chr3	29049651	29053240
Unigene0043139	chr3	29062685	29063877
Unigene0037434	chr3	29066164	29071339
Unigene0006097	chr3	29127532	29132902
Unigene0008394	chr3	29142527	29144283
Unigene0016497	chr3	29162608	29170674
Unigene0016496	chr3	29162957	29170674
Unigene0046946	chr3	29178235	29180132
Unigene0011638	chr3	29202539	29204983
Unigene0044039	chr3	29240351	29247114
Unigene0008251	chr3	29252813	29254485
Unigene0008707	chr3	29262817	29269340
Unigene0008708	chr3	29262817	29269499
Unigene0042264	chr3	29322717	29327404
Unigene0022020	chr3	29343089	29347991
Unigene0022021	chr3	29343089	29347799
Unigene0022022	chr3	29343089	29347799
Unigene0022023	chr3	29343089	29347799
Unigene0022024	chr3	29343089	29347799
Unigene0022025	chr3	29343089	29347799
Unigene0022026	chr3	29343089	29347991
Unigene0022027	chr3	29343089	29347799
Unigene0010642	chr3	29360411	29362544
Unigene0045211	chr3	29363977	29370928
Unigene0052389	chr3	29383532	29387177
Unigene0002080	chr3	29404009	29407205
Unigene0002081	chr3	29404009	29407205
Unigene0035808	chr3	29411864	29417548
Unigene0004947	chr3	29423605	29431518
Unigene0009248	chr3	29667037	29670122
Unigene0041645	chr3	29671904	29677716
Unigene0043397	chr3	29737667	29742192
Unigene0014637	chr3	29744410	29753635
Unigene0014638	chr3	29744410	29753635
Unigene0070229	chr3	29748519	29749051
Unigene0041811	chr3	29761742	29765151
Unigene0003947	chr3	29781551	29795232
Unigene0003948	chr3	29781551	29795232
Unigene0016980	chr3	30090008	30096701
Unigene0016981	chr3	30090008	30096701
Unigene0038309	chr3	30149330	30149468
Unigene0038309	chr3	30152013	30152156
Unigene0005617	chr3	30323531	30330702
Unigene0037211	chr3	30340028	30340912
Unigene0037212	chr3	30341569	30342351
Unigene0037210	chr3	30341572	30342352
Unigene0037213	chr3	30358709	30363962
Unigene0037211	chr3	30358930	30364412
Unigene0037211	chr3	30359178	30359846
Unigene0037212	chr3	30360202	30361053
Unigene0037212	chr3	30364759	30365607
Unigene0037210	chr3	30364783	30365608
Unigene0002188	chr3	30525472	30529753
Unigene0002187	chr3	30529140	30529753
Unigene0020286	chr3	30532082	30534397
Unigene0020287	chr3	30532082	30534397
Unigene0020288	chr3	30532082	30536190
Unigene0018054	chr3	30562824	30566037
Unigene0018055	chr3	30562824	30566037
Unigene0083639	chr3	30671693	30674285
Unigene0045626	chr3	30688712	30692170
Unigene0017721	chr3	30754890	30759567
Unigene0029716	chr3	30846746	30847275
Unigene0029715	chr3	30848419	30852192
Unigene0081676	chr3	30849620	30852192
Unigene0046767	chr3	30849857	30850369
Unigene0019388	chr3	30854708	30858505
Unigene0004915	chr3	30889597	30894150
Unigene0035345	chr3	30898500	30899779
Unigene0035353	chr3	30900804	30904766
Unigene0013003	chr3	30916298	30917649
Unigene0048987	chr3	30923094	30923792
Unigene0042168	chr3	30925515	30929954
Unigene0014545	chr3	30940449	30945863
Unigene0014546	chr3	30940449	30945863
Unigene0026265	chr3	30949698	30955527
Unigene0026267	chr3	30949698	30955527
Unigene0026269	chr3	30949698	30955527
Unigene0026270	chr3	30949698	30955527
Unigene0026273	chr3	30953360	30955527
Unigene0046926	chr3	30970230	30974077
Unigene0043381	chr3	30974703	30979617
Unigene0044092	chr3	31003085	31011040
Unigene0082908	chr3	31037418	31043540
Unigene0083650	chr3	31037418	31043540
Unigene0083724	chr3	31037418	31041701
Unigene0086266	chr3	31037418	31041701
Unigene0032421	chr3	31042040	31043540
Unigene0019394	chr3	31051222	31060245
Unigene0019396	chr3	31051222	31060245
Unigene0075477	chr3	31108178	31108484
Unigene0018698	chr3	31116664	31122170
Unigene0018699	chr3	31116664	31122051
Unigene0018700	chr3	31116664	31122051
Unigene0018701	chr3	31116664	31122051
Unigene0018702	chr3	31116664	31122170
Unigene0018703	chr3	31116664	31122051
Unigene0044496	chr3	31158847	31161833
Unigene0078973	chr3	31173334	31173611
Unigene0043748	chr3	31178565	31184813
Unigene0045088	chr3	31214032	31218170
Unigene0017404	chr3	31225045	31229208
Unigene0018427	chr3	31270823	31275885
Unigene0018428	chr3	31270823	31275885
Unigene0081956	chr3	31283924	31287459
Unigene0084773	chr3	31283924	31287459
Unigene0086249	chr3	31283924	31287459
Unigene0087038	chr3	31283924	31287459
Unigene0005410	chr3	31347912	31348600
Unigene0011445	chr3	31367657	31370389
Unigene0042600	chr3	31390622	31393937
Unigene0036985	chr3	31410542	31421696
Unigene0036988	chr3	31410542	31424423
Unigene0046655	chr3	31446199	31448606
Unigene0005085	chr3	31451194	31456188
Unigene0049441	chr3	31451766	31452255
Unigene0045453	chr3	31485596	31485802
Unigene0003460	chr3	31490594	31493804
Unigene0051070	chr3	31493785	31494353
Unigene0041415	chr3	31498396	31501104
Unigene0010401	chr3	31504299	31508534
Unigene0038120	chr3	31527659	31527947
Unigene0037532	chr3	31527929	31529797
Unigene0020194	chr3	31533341	31537052
Unigene0020195	chr3	31533341	31537011
Unigene0020196	chr3	31533341	31537052
Unigene0020197	chr3	31533341	31537052
Unigene0020198	chr3	31533341	31537011
Unigene0020199	chr3	31533341	31537011
Unigene0020200	chr3	31533341	31537052
Unigene0020201	chr3	31533341	31537011
Unigene0048582	chr3	31570976	31571731
Unigene0045472	chr3	31575206	31581631
Unigene0078484	chr3	31580826	31581031
Unigene0004222	chr3	31587912	31595503
Unigene0001398	chr3	31661380	31662636
Unigene0041606	chr3	31714772	31719192
Unigene0043972	chr3	31740137	31741888
Unigene0085753	chr3	31756986	31758165
Unigene0048002	chr3	31760864	31770891
Unigene0073929	chr3	31764895	31765103
Unigene0063367	chr3	31788410	31788725
Unigene0004201	chr3	31864102	31867944
Unigene0004202	chr3	31864102	31867944
Unigene0054389	chr3	31897092	31897384
Unigene0008769	chr3	31925398	31932575
Unigene0008975	chr3	31953378	31955484
Unigene0043864	chr3	31976613	31978955
Unigene0062182	chr3	32009288	32010200
Unigene0079913	chr3	32010186	32010693
Unigene0072615	chr3	32012015	32012272
Unigene0034082	chr3	32018781	32020299
Unigene0001528	chr3	32040198	32040723
Unigene0043088	chr3	32058990	32065108
Unigene0063310	chr3	32141619	32142313
Unigene0068588	chr3	32142300	32142831
Unigene0080861	chr3	32142996	32143233
Unigene0078833	chr3	32143689	32144308
Unigene0076809	chr3	32144372	32145125
Unigene0002178	chr3	32145270	32145479
Unigene0077539	chr3	32145564	32145686
Unigene0024366	chr3	32152547	32156155
Unigene0024367	chr3	32152547	32160214
Unigene0085058	chr3	32152547	32158586
Unigene0085059	chr3	32152547	32160214
Unigene0085060	chr3	32152547	32158586
Unigene0041176	chr3	32163608	32165853
Unigene0018008	chr3	32165833	32168442
Unigene0052569	chr3	32167803	32167927
Unigene0009319	chr3	32177302	32185163
Unigene0052165	chr3	32179154	32179393
Unigene0044967	chr3	32190331	32198092
Unigene0060419	chr3	32415927	32416678
Unigene0062785	chr3	32439967	32445410
Unigene0066561	chr3	32445396	32446478
Unigene0034119	chr3	32463404	32466710
Unigene0034126	chr3	32466715	32472730
Unigene0034125	chr3	32466866	32468019
Unigene0034100	chr3	32468909	32472730
Unigene0044367	chr3	32499560	32505002
Unigene0004854	chr3	32514143	32525609
Unigene0004039	chr3	32583964	32589653
Unigene0004534	chr3	32669179	32675343
Unigene0004535	chr3	32669179	32675343
Unigene0043982	chr3	32714592	32721425
Unigene0017432	chr3	32726418	32734207
Unigene0084654	chr3	32730230	32731086
Unigene0031949	chr3	32735534	32737875
Unigene0031948	chr3	32735809	32743468
Unigene0031949	chr3	32740980	32743468
Unigene0031948	chr3	32741992	32743260
Unigene0031949	chr3	32748875	32752513
Unigene0031948	chr3	32748924	32752512
Unigene0034287	chr3	32859668	32862752
Unigene0054882	chr3	32879553	32879916
Unigene0024663	chr3	32919193	32921177
Unigene0024664	chr3	32919193	32921177
Unigene0024665	chr3	32919193	32921177
Unigene0024666	chr3	32919193	32921177
Unigene0024667	chr3	32919193	32921177
Unigene0024668	chr3	32919193	32921177
Unigene0024669	chr3	32919193	32921177
Unigene0024670	chr3	32919193	32921177
Unigene0024671	chr3	32919193	32921177
Unigene0024672	chr3	32919193	32921177
Unigene0024673	chr3	32919193	32921177
Unigene0024674	chr3	32919193	32921177
Unigene0046436	chr3	32983496	32985904
Unigene0028809	chr3	32997020	32997524
Unigene0025474	chr3	33041730	33047021
Unigene0025476	chr3	33041730	33047021
Unigene0025482	chr3	33041730	33047021
Unigene0025483	chr3	33041730	33047021
Unigene0025466	chr3	33041977	33047021
Unigene0025470	chr3	33041977	33047021
Unigene0025473	chr3	33042666	33047021
Unigene0025478	chr3	33042666	33047021
Unigene0025479	chr3	33042666	33047021
Unigene0025480	chr3	33042666	33047021
Unigene0025465	chr3	33043516	33047021
Unigene0025467	chr3	33043516	33047021
Unigene0025472	chr3	33043516	33047021
Unigene0025475	chr3	33043516	33047021
Unigene0064780	chr3	33062161	33062296
Unigene0010011	chr3	33065042	33066559
Unigene0014160	chr3	33078945	33085254
Unigene0014161	chr3	33078945	33085254
Unigene0014973	chr3	33091247	33095896
Unigene0014975	chr3	33091247	33095896
Unigene0014976	chr3	33091247	33095896
Unigene0073555	chr3	33115160	33115473
Unigene0054395	chr3	33131852	33132827
Unigene0044729	chr3	33155966	33158461
Unigene0056302	chr3	33166293	33167543
Unigene0064442	chr3	33167753	33168122
Unigene0067240	chr3	33168105	33169177
Unigene0069461	chr3	33170583	33171238
Unigene0062386	chr3	33171216	33171673
Unigene0078075	chr3	33172693	33172972
Unigene0080481	chr3	33174787	33175281
Unigene0020151	chr3	33195001	33198726
Unigene0047325	chr3	33221845	33225661
Unigene0049000	chr3	33226992	33231800
Unigene0043209	chr3	33251300	33257369
Unigene0002745	chr3	33262319	33263779
Unigene0002746	chr3	33262319	33263779
Unigene0008413	chr3	33271785	33274951
Unigene0008414	chr3	33271785	33274951
Unigene0068354	chr3	33280258	33280647
Unigene0058044	chr3	33280632	33280953
Unigene0065389	chr3	33280944	33281351
Unigene0059206	chr3	33281328	33281961
Unigene0020363	chr3	33282041	33282190
Unigene0084798	chr3	33283518	33285888
Unigene0042112	chr3	33313168	33317747
Unigene0078155	chr3	33327222	33327451
Unigene0082557	chr3	33342420	33346079
Unigene0074071	chr3	33348740	33348879
Unigene0048990	chr3	33374038	33374608
Unigene0011520	chr3	33418112	33421501
Unigene0011521	chr3	33418112	33421357
Unigene0011522	chr3	33418112	33421501
Unigene0011523	chr3	33418112	33421501
Unigene0045858	chr3	33422532	33425374
Unigene0047306	chr3	33437920	33443697
Unigene0053657	chr3	33467241	33470541
Unigene0043203	chr3	33475031	33481961
Unigene0003453	chr3	33485129	33485768
Unigene0049655	chr3	33485907	33487784
Unigene0045725	chr3	33500175	33501452
Unigene0010720	chr3	33501435	33504139
Unigene0010721	chr3	33501435	33504064
Unigene0010722	chr3	33501435	33504064
Unigene0010723	chr3	33501435	33504139
Unigene0008001	chr3	33521561	33527265
Unigene0042352	chr3	33531970	33536035
Unigene0004024	chr3	33536209	33538714
Unigene0004025	chr3	33536209	33538714
Unigene0003637	chr3	33557009	33557426
Unigene0084342	chr3	33558388	33561963
Unigene0025563	chr3	33559866	33561963
Unigene0011665	chr3	33577441	33590652
Unigene0011666	chr3	33578517	33590652
Unigene0077898	chr3	33588585	33588749
Unigene0009248	chr3	33594573	33597572
Unigene0019924	chr3	33604631	33610023
Unigene0047586	chr3	33620174	33625198
Unigene0032291	chr3	33650341	33655631
Unigene0085252	chr3	33650341	33655631
Unigene0032300	chr3	33652739	33653118
Unigene0032312	chr3	33653095	33653469
Unigene0046117	chr3	33875203	33875631
Unigene0009559	chr3	33875611	33891435
Unigene0009560	chr3	33875611	33888993
Unigene0042938	chr3	33932598	33940057
Unigene0049967	chr3	33978448	33979282
Unigene0030664	chr3	33990113	33993044
Unigene0030665	chr3	33990113	33993044
Unigene0083935	chr3	33990113	33992710
Unigene0085890	chr3	33990113	33992710
Unigene0086211	chr3	34031422	34037938
Unigene0005795	chr3	34048702	34055456
Unigene0039427	chr3	34060925	34062968
Unigene0044965	chr3	34101464	34102879
Unigene0015998	chr3	34156760	34160521
Unigene0015999	chr3	34156760	34160521
Unigene0020306	chr3	34160511	34163488
Unigene0044053	chr3	34180041	34188021
Unigene0081838	chr3	34201424	34208050
Unigene0082917	chr3	34201424	34208050
Unigene0084805	chr3	34201424	34208050
Unigene0087029	chr3	34201424	34208050
Unigene0044973	chr3	34305324	34306698
Unigene0014628	chr3	34306678	34309819
Unigene0014629	chr3	34306678	34309819
Unigene0014630	chr3	34306678	34309819
Unigene0021982	chr3	34383741	34390965
Unigene0012253	chr3	34486588	34486724
Unigene0047867	chr3	34486828	34493167
Unigene0010038	chr3	34495741	34498691
Unigene0012108	chr3	34503652	34505596
Unigene0012110	chr3	34503652	34505499
Unigene0065137	chr3	34535564	34535772
Unigene0025055	chr3	34539309	34543126
Unigene0025058	chr3	34539309	34541586
Unigene0025060	chr3	34539309	34543126
Unigene0025061	chr3	34539309	34543247
Unigene0025062	chr3	34539309	34543126
Unigene0025063	chr3	34539309	34543247
Unigene0025064	chr3	34539309	34543126
Unigene0025065	chr3	34539309	34543126
Unigene0025066	chr3	34539309	34543126
Unigene0081547	chr3	34539309	34543126
Unigene0083210	chr3	34539309	34543247
Unigene0084392	chr3	34539309	34543247
Unigene0006783	chr3	34546585	34551898
Unigene0024216	chr3	34597841	34608103
Unigene0024220	chr3	34597841	34608103
Unigene0024227	chr3	34597841	34608103
Unigene0024228	chr3	34597841	34608103
Unigene0041933	chr3	34610448	34610763
Unigene0039674	chr3	34610789	34612866
Unigene0041055	chr3	34612972	34613272
Unigene0014742	chr3	34646646	34651421
Unigene0014743	chr3	34646646	34651421
Unigene0043358	chr3	34670629	34684211
Unigene0055041	chr3	34674275	34674734
Unigene0009940	chr3	34881754	34907906
Unigene0009939	chr3	34895578	34907641
Unigene0030468	chr3	34993061	35010577
Unigene0007927	chr3	35012387	35022794
Unigene0053231	chr3	35037449	35038637
Unigene0046719	chr3	35056352	35057615
Unigene0042379	chr3	35075227	35082961
Unigene0068253	chr3	35091360	35091697
Unigene0041505	chr3	35109907	35112979
Unigene0062332	chr3	35137484	35139542
Unigene0062977	chr3	35139526	35140142
Unigene0001329	chr3	35140257	35141359
Unigene0071073	chr3	35141775	35142735
Unigene0064004	chr3	35142781	35143471
Unigene0043593	chr3	35152095	35174702
Unigene0008873	chr3	35176034	35177079
Unigene0008874	chr3	35176034	35177079
Unigene0082495	chr3	35177664	35180088
Unigene0082658	chr3	35177664	35178293
Unigene0084285	chr3	35177664	35180088
Unigene0026918	chr3	35184263	35189696
Unigene0026922	chr3	35184263	35189696
Unigene0026923	chr3	35184263	35189696
Unigene0026924	chr3	35184263	35189696
Unigene0026926	chr3	35184263	35189696
Unigene0026927	chr3	35184263	35189696
Unigene0026928	chr3	35184263	35189696
Unigene0026929	chr3	35184263	35189696
Unigene0026919	chr3	35185168	35189696
Unigene0026920	chr3	35185168	35189696
Unigene0026921	chr3	35185168	35189696
Unigene0026925	chr3	35185168	35189696
Unigene0064219	chr3	35215524	35215699
Unigene0075866	chr3	35215768	35215933
Unigene0060566	chr3	35318673	35319523
Unigene0064422	chr3	35320157	35321591
Unigene0085145	chr3	35334214	35335759
Unigene0085146	chr3	35334214	35335759
Unigene0085148	chr3	35334214	35335759
Unigene0085149	chr3	35334214	35335759
Unigene0041805	chr3	35340349	35342693
Unigene0006087	chr3	35344691	35348085
Unigene0006088	chr3	35344691	35348085
Unigene0076410	chr3	35344899	35345075
Unigene0010692	chr3	35380768	35393046
Unigene0044914	chr3	35421561	35425961
Unigene0043650	chr3	35475617	35482007
Unigene0006974	chr3	35487043	35492699
Unigene0042598	chr3	35504711	35507900
Unigene0026869	chr3	35624554	35635210
Unigene0026870	chr3	35624554	35635210
Unigene0026871	chr3	35624554	35635210
Unigene0026872	chr3	35624554	35635210
Unigene0068323	chr3	35629056	35629311
Unigene0038030	chr3	35671189	35671599
Unigene0007476	chr3	35702387	35707662
Unigene0007477	chr3	35702387	35707662
Unigene0023967	chr3	35715941	35717741
Unigene0024499	chr3	35761069	35761766
Unigene0047481	chr3	35769864	35773812
Unigene0047036	chr3	35792418	35795857
Unigene0047738	chr3	35818405	35828619
Unigene0016514	chr3	35859935	35864906
Unigene0045881	chr3	35866468	35868292
Unigene0068030	chr3	35891776	35892226
Unigene0045911	chr3	35930601	35933868
Unigene0026081	chr3	35938025	35943377
Unigene0026087	chr3	35938025	35943377
Unigene0026080	chr3	35939488	35943377
Unigene0026082	chr3	35939488	35944892
Unigene0066083	chr3	35955822	35956361
Unigene0065877	chr3	35956427	35956778
Unigene0060657	chr3	36044854	36045145
Unigene0041765	chr3	36060503	36067672
Unigene0045112	chr3	36140550	36141497
Unigene0045259	chr3	36143690	36144162
Unigene0010490	chr3	36144140	36146322
Unigene0042861	chr3	36483914	36490535
Unigene0043268	chr3	36503551	36509989
Unigene0072094	chr3	36506075	36506327
Unigene0004600	chr3	36550320	36553767
Unigene0042964	chr3	36570028	36573304
Unigene0019937	chr3	36638599	36639820
Unigene0018322	chr3	36643902	36648102
Unigene0008363	chr3	36644568	36644825
Unigene0012492	chr3	36644812	36645384
Unigene0012683	chr3	36645396	36645627
Unigene0054995	chr3	36645528	36645798
Unigene0018322	chr3	36662808	36668283
Unigene0008363	chr3	36663490	36663746
Unigene0012492	chr3	36663727	36663941
Unigene0012683	chr3	36664301	36664531
Unigene0054995	chr3	36664432	36664702
Unigene0005888	chr3	36676584	36681126
Unigene0078109	chr3	36715437	36715693
Unigene0045495	chr3	36727285	36731755
Unigene0041908	chr3	36788577	36797070
Unigene0065503	chr3	36792475	36792773
Unigene0056996	chr3	36792812	36793072
Unigene0081466	chr3	36807847	36813641
Unigene0081468	chr3	36807847	36813641
Unigene0083123	chr3	36807847	36813641
Unigene0019475	chr3	36817617	36819813
Unigene0006666	chr3	36824653	36830029
Unigene0006667	chr3	36824653	36830029
Unigene0040196	chr3	36898143	36898635
Unigene0062305	chr3	36898457	36898668
Unigene0040196	chr3	36917686	36918188
Unigene0004620	chr3	36918939	36919637
Unigene0060364	chr3	36929354	36929677
Unigene0010616	chr3	36935795	36936753
Unigene0010617	chr3	36935795	36942872
Unigene0020494	chr3	37011063	37020791
Unigene0020493	chr3	37018320	37020791
Unigene0087001	chr3	37024411	37028821
Unigene0021938	chr3	37024687	37043369
Unigene0086963	chr3	37024687	37028821
Unigene0004702	chr3	37034984	37040378
Unigene0005217	chr3	37040357	37045511
Unigene0005218	chr3	37040357	37045511
Unigene0007645	chr3	37060669	37061816
Unigene0081644	chr3	37084703	37087295
Unigene0086675	chr3	37084703	37087295
Unigene0008470	chr3	37089988	37090633
Unigene0015108	chr3	37107272	37109478
Unigene0007273	chr3	37109581	37110078
Unigene0045886	chr3	37152094	37157757
Unigene0048630	chr3	37193866	37195471
Unigene0008921	chr3	37201252	37205070
Unigene0070382	chr3	37213849	37214117
Unigene0011386	chr3	37300277	37302744
Unigene0083481	chr3	37300277	37302744
Unigene0012385	chr3	37311824	37320418
Unigene0012386	chr3	37311824	37320418
Unigene0007248	chr3	37336422	37340200
Unigene0007249	chr3	37336422	37340200
Unigene0005466	chr3	37344437	37347122
Unigene0005465	chr3	37347379	37349266
Unigene0045240	chr3	37363419	37368394
Unigene0025863	chr3	37375141	37392478
Unigene0015165	chr3	37464637	37474388
Unigene0015164	chr3	37464779	37474388
Unigene0041351	chr3	37522672	37526622
Unigene0011747	chr3	37539191	37547193
Unigene0011748	chr3	37539191	37547193
Unigene0011749	chr3	37539191	37547193
Unigene0005372	chr3	37566412	37584460
Unigene0045146	chr3	37589631	37592506
Unigene0081991	chr3	37703808	37706689
Unigene0083242	chr3	37703808	37706689
Unigene0084323	chr3	37703808	37706689
Unigene0085862	chr3	37703808	37706689
Unigene0011129	chr3	37709186	37717450
Unigene0011131	chr3	37709186	37717450
Unigene0078594	chr3	37779469	37780200
Unigene0020437	chr3	37781360	37787180
Unigene0020438	chr3	37781360	37787180
Unigene0004381	chr3	37789026	37792704
Unigene0063644	chr3	37822485	37827131
Unigene0032146	chr3	37836330	37847371
Unigene0032148	chr3	37845035	37847371
Unigene0011565	chr3	37873849	37878660
Unigene0011566	chr3	37873849	37881423
Unigene0071199	chr3	37877527	37877667
Unigene0044012	chr3	37882886	37886676
Unigene0065534	chr3	37968495	37969042
Unigene0070342	chr3	37969462	37970038
Unigene0082548	chr3	38009455	38013118
Unigene0082583	chr3	38009455	38013118
Unigene0084334	chr3	38009455	38013118
Unigene0086333	chr3	38009455	38013118
Unigene0087105	chr3	38009455	38013118
Unigene0082981	chr3	38009526	38012015
Unigene0070342	chr3	38118748	38119324
Unigene0000549	chr3	38130018	38130579
Unigene0015031	chr3	38130568	38130894
Unigene0065534	chr3	38130887	38131271
Unigene0013185	chr3	38131250	38131540
Unigene0064837	chr3	38131542	38132635
Unigene0009844	chr3	38141803	38142084
Unigene0005215	chr3	38142351	38143004
Unigene0005620	chr3	38157649	38162120
Unigene0005621	chr3	38157649	38162120
Unigene0047644	chr3	38176160	38176507
Unigene0041420	chr3	38190318	38191591
Unigene0041431	chr3	38191568	38196681
Unigene0051372	chr3	38234605	38236939
Unigene0010177	chr3	38236935	38239553
Unigene0070951	chr3	38248828	38249193
Unigene0081809	chr3	38255415	38255779
Unigene0036969	chr3	38262283	38262617
Unigene0028338	chr3	38285693	38288233
Unigene0028339	chr3	38285693	38288233
Unigene0028340	chr3	38285693	38288014
Unigene0028341	chr3	38285693	38288014
Unigene0028338	chr3	38290905	38298718
Unigene0028340	chr3	38290905	38298907
Unigene0028339	chr3	38291075	38298718
Unigene0028341	chr3	38291075	38298907
Unigene0042001	chr3	38293580	38293869
Unigene0033915	chr3	38307590	38310408
Unigene0005402	chr3	38313553	38319187
Unigene0005403	chr3	38313553	38319187
Unigene0054819	chr3	38330862	38331753
Unigene0075206	chr3	38371373	38371740
Unigene0068964	chr3	38373693	38374686
Unigene0079503	chr3	38374864	38375207
Unigene0013606	chr3	38375188	38375502
Unigene0082250	chr3	38375188	38376101
Unigene0013605	chr3	38375345	38375502
Unigene0066016	chr3	38376328	38376873
Unigene0005498	chr3	38377103	38379252
Unigene0005499	chr3	38377103	38379953
Unigene0056521	chr3	38377873	38378371
Unigene0045601	chr3	38398658	38400056
Unigene0047113	chr3	38400059	38401645
Unigene0084898	chr3	38401625	38404679
Unigene0045266	chr3	38467142	38469074
Unigene0014250	chr3	38485812	38486344
Unigene0046289	chr3	38499847	38501964
Unigene0069022	chr3	38515387	38515786
Unigene0057853	chr3	38536676	38537198
Unigene0002552	chr3	38538213	38538943
Unigene0080812	chr3	38547605	38547847
Unigene0044705	chr3	38582393	38586147
Unigene0034098	chr3	38595817	38596565
Unigene0054289	chr3	38596618	38597220
Unigene0043349	chr3	38625740	38626582
Unigene0085510	chr3	38644641	38651049
Unigene0019242	chr3	38654484	38678008
Unigene0019243	chr3	38654484	38690980
Unigene0019244	chr3	38654484	38678008
Unigene0085918	chr3	38654484	38690980
Unigene0043313	chr3	38858651	38870641
Unigene0027287	chr3	38875608	38885373
Unigene0027288	chr3	38875608	38885373
Unigene0002512	chr3	38904116	38909536
Unigene0002513	chr3	38904116	38909536
Unigene0009330	chr3	38932577	38934323
Unigene0042957	chr3	38958278	38961117
Unigene0011084	chr3	38969510	38970587
Unigene0009296	chr3	38970836	38974544
Unigene0004924	chr3	39066255	39069448
Unigene0004925	chr3	39066255	39069448
Unigene0069660	chr3	39075513	39075753
Unigene0068289	chr3	39076824	39077542
Unigene0082755	chr3	39077525	39078214
Unigene0065284	chr3	39078198	39078731
Unigene0020451	chr3	39079744	39083468
Unigene0002670	chr3	39094463	39097800
Unigene0042518	chr3	39104994	39109880
Unigene0004889	chr3	39109862	39115647
Unigene0060402	chr3	39163243	39163729
Unigene0041490	chr3	39168532	39171788
Unigene0004932	chr3	39217259	39218724
Unigene0026328	chr3	39274961	39277127
Unigene0026329	chr3	39274961	39277127
Unigene0083109	chr3	39274961	39279330
Unigene0083110	chr3	39274961	39279330
Unigene0083111	chr3	39274961	39279330
Unigene0083112	chr3	39274961	39279330
Unigene0044527	chr3	39294722	39297989
Unigene0046360	chr3	39550606	39555750
Unigene0010183	chr3	39562930	39568287
Unigene0045715	chr3	39634142	39638073
Unigene0009902	chr3	39961812	39966586
Unigene0076154	chr3	39963147	39963376
Unigene0049585	chr3	39974699	39975487
Unigene0022102	chr3	39986759	39988898
Unigene0044040	chr3	40006260	40010157
Unigene0054740	chr3	40011085	40011929
Unigene0057996	chr3	40015335	40015527
Unigene0082451	chr3	40023761	40032235
Unigene0082552	chr3	40023761	40032235
Unigene0082891	chr3	40023761	40032235
Unigene0082987	chr3	40023761	40032235
Unigene0083239	chr3	40023761	40032235
Unigene0086585	chr3	40023761	40032235
Unigene0030706	chr3	40029428	40032235
Unigene0086243	chr3	40029428	40032235
Unigene0003368	chr3	40040925	40045753
Unigene0003369	chr3	40040925	40045753
Unigene0038356	chr3	40047426	40048900
Unigene0004301	chr3	40160884	40164148
Unigene0004302	chr3	40160884	40164148
Unigene0017027	chr3	40170550	40189144
Unigene0017026	chr3	40184294	40189144
Unigene0042831	chr3	40224696	40227363
Unigene0044127	chr3	40281172	40285926
Unigene0045484	chr3	40287339	40291560
Unigene0009012	chr3	40329990	40331300
Unigene0051256	chr3	40331278	40333344
Unigene0051428	chr3	40334300	40334923
Unigene0032056	chr3	40336115	40342190
Unigene0032070	chr3	40336115	40342190
Unigene0032089	chr3	40336115	40342190
Unigene0032103	chr3	40336115	40342190
Unigene0032111	chr3	40336115	40342190
Unigene0032117	chr3	40336115	40342190
Unigene0032118	chr3	40336115	40342190
Unigene0032123	chr3	40336115	40342190
Unigene0032131	chr3	40336115	40342190
Unigene0032134	chr3	40336115	40342190
Unigene0032051	chr3	40336148	40343341
Unigene0032052	chr3	40336148	40343341
Unigene0032053	chr3	40336148	40343074
Unigene0032055	chr3	40336148	40343074
Unigene0032057	chr3	40336148	40343341
Unigene0032058	chr3	40336148	40343341
Unigene0032059	chr3	40336148	40343341
Unigene0032060	chr3	40336148	40343341
Unigene0032061	chr3	40336148	40343074
Unigene0032062	chr3	40336148	40343074
Unigene0032063	chr3	40336148	40343341
Unigene0032064	chr3	40336148	40343074
Unigene0032065	chr3	40336148	40343074
Unigene0032066	chr3	40336148	40343074
Unigene0032067	chr3	40336148	40343074
Unigene0032068	chr3	40336148	40343074
Unigene0032069	chr3	40336148	40343341
Unigene0032071	chr3	40336148	40343341
Unigene0032072	chr3	40336148	40343341
Unigene0032073	chr3	40336148	40343074
Unigene0032074	chr3	40336148	40343074
Unigene0032076	chr3	40336148	40343341
Unigene0032078	chr3	40336148	40343341
Unigene0032079	chr3	40336148	40343074
Unigene0032081	chr3	40336148	40343074
Unigene0032082	chr3	40336148	40343341
Unigene0032083	chr3	40336148	40343341
Unigene0032085	chr3	40336148	40343341
Unigene0032086	chr3	40336148	40343341
Unigene0032087	chr3	40336148	40343341
Unigene0032088	chr3	40336148	40343074
Unigene0032090	chr3	40336148	40343074
Unigene0032091	chr3	40336148	40343341
Unigene0032092	chr3	40336148	40343341
Unigene0032094	chr3	40336148	40343341
Unigene0032095	chr3	40336148	40343341
Unigene0032096	chr3	40336148	40343341
Unigene0032097	chr3	40336148	40343074
Unigene0032098	chr3	40336148	40343341
Unigene0032099	chr3	40336148	40343074
Unigene0032100	chr3	40336148	40343341
Unigene0032104	chr3	40336148	40343074
Unigene0032105	chr3	40336148	40343341
Unigene0032106	chr3	40336148	40343074
Unigene0032108	chr3	40336148	40343074
Unigene0032109	chr3	40336148	40343074
Unigene0032110	chr3	40336148	40343341
Unigene0032112	chr3	40336148	40343074
Unigene0032113	chr3	40336148	40343074
Unigene0032114	chr3	40336148	40343341
Unigene0032115	chr3	40336148	40343074
Unigene0032119	chr3	40336148	40343074
Unigene0032120	chr3	40336148	40343074
Unigene0032121	chr3	40336148	40343341
Unigene0032122	chr3	40336148	40343341
Unigene0032125	chr3	40336148	40343341
Unigene0032126	chr3	40336148	40343074
Unigene0032128	chr3	40336148	40343074
Unigene0032130	chr3	40336148	40343341
Unigene0032132	chr3	40336148	40343074
Unigene0032133	chr3	40336148	40343074
Unigene0032135	chr3	40336148	40343074
Unigene0083031	chr3	40336148	40343074
Unigene0083032	chr3	40336148	40343341
Unigene0032054	chr3	40336748	40342190
Unigene0032075	chr3	40336748	40342190
Unigene0032080	chr3	40336748	40342190
Unigene0032084	chr3	40336748	40342190
Unigene0032093	chr3	40336748	40342190
Unigene0032101	chr3	40336748	40342190
Unigene0032102	chr3	40336748	40342190
Unigene0032107	chr3	40336748	40338718
Unigene0032116	chr3	40336748	40342190
Unigene0032124	chr3	40336748	40342190
Unigene0083033	chr3	40336748	40343341
Unigene0083034	chr3	40336748	40343074
Unigene0042083	chr3	40585696	40589924
Unigene0081762	chr3	40614433	40619440
Unigene0085366	chr3	40614433	40619440
Unigene0085381	chr3	40614433	40619440
Unigene0053901	chr3	40619423	40620691
Unigene0014142	chr3	40654979	40659058
Unigene0014144	chr3	40654979	40659058
Unigene0049907	chr3	40666034	40666314
Unigene0049561	chr3	40666628	40667520
Unigene0046654	chr3	40680585	40688158
Unigene0013519	chr3	40954466	40956071
Unigene0017259	chr3	40957943	40961202
Unigene0017260	chr3	40957943	40961316
Unigene0017262	chr3	40957943	40961202
Unigene0075958	chr3	40970315	40970505
Unigene0009484	chr3	41020461	41021637
Unigene0041640	chr3	41021617	41023718
Unigene0016749	chr3	41043470	41047651
Unigene0084571	chr3	41043470	41047651
Unigene0043539	chr3	41131574	41136161
Unigene0008904	chr3	41323982	41328873
Unigene0008903	chr3	41324413	41328873
Unigene0025085	chr3	41352605	41357468
Unigene0025086	chr3	41352605	41357468
Unigene0003347	chr3	41473063	41475084
Unigene0003348	chr3	41473063	41475084
Unigene0036269	chr3	41496493	41497412
Unigene0012271	chr3	41720653	41722215
Unigene0012272	chr3	41720653	41722215
Unigene0084786	chr3	41730413	41739582
Unigene0044853	chr3	41762719	41768286
Unigene0069066	chr3	41770503	41771123
Unigene0069937	chr3	41771150	41771329
Unigene0046226	chr3	41775091	41777108
Unigene0082024	chr3	41803217	41805656
Unigene0056154	chr3	41804667	41805337
Unigene0004524	chr3	41808022	41814341
Unigene0013984	chr3	41824892	41825676
Unigene0007834	chr3	41843670	41844757
Unigene0007835	chr3	41843670	41845679
Unigene0018492	chr3	41851291	41856352
Unigene0018493	chr3	41851291	41856352
Unigene0052952	chr3	41904288	41904953
Unigene0042772	chr3	41906377	41932148
Unigene0062465	chr3	41913233	41913408
Unigene0075109	chr3	41919236	41919422
Unigene0025195	chr3	42038767	42047355
Unigene0044413	chr3	42038994	42039639
Unigene0044407	chr3	42039617	42041890
Unigene0043348	chr3	42043972	42044276
Unigene0042238	chr3	42051546	42056352
Unigene0047941	chr3	42345610	42346343
Unigene0049890	chr3	42391009	42392603
Unigene0031902	chr3	42511753	42515605
Unigene0008641	chr3	42533015	42537581
Unigene0011671	chr3	42545992	42546495
Unigene0041631	chr3	42546517	42547300
Unigene0075819	chr3	42564059	42564836
Unigene0047923	chr3	42590387	42590894
Unigene0044555	chr3	42591982	42595308
Unigene0045153	chr3	42596391	42599821
Unigene0013945	chr3	42635885	42637603
Unigene0019499	chr3	42640181	42646704
Unigene0031406	chr3	42661089	42665486
Unigene0031407	chr3	42661089	42665486
Unigene0046551	chr3	42665246	42665878
Unigene0011725	chr3	42668098	42675491
Unigene0029103	chr3	42713058	42715176
Unigene0018929	chr3	42769212	42769667
Unigene0003890	chr3	42808327	42813321
Unigene0056307	chr3	42815178	42815979
Unigene0055887	chr3	42815958	42816284
Unigene0083604	chr3	42865718	42868833
Unigene0004406	chr3	42898808	42901398
Unigene0048162	chr3	42991240	42996835
Unigene0020017	chr3	42997411	42998916
Unigene0008814	chr3	42998846	43018343
Unigene0041205	chr3	43020417	43022216
Unigene0042693	chr3	43030045	43032989
Unigene0011457	chr3	43039314	43041683
Unigene0011460	chr3	43039314	43041683
Unigene0070882	chr3	43058647	43062037
Unigene0042748	chr3	43129374	43132661
Unigene0004337	chr3	43151264	43159878
Unigene0004338	chr3	43151696	43159878
Unigene0005513	chr3	43187717	43193549
Unigene0014527	chr3	43212698	43221755
Unigene0014528	chr3	43212698	43221755
Unigene0014529	chr3	43212698	43221755
Unigene0014530	chr3	43212698	43221755
Unigene0014531	chr3	43212698	43221755
Unigene0014532	chr3	43212698	43221755
Unigene0044726	chr3	43224202	43229647
Unigene0004047	chr3	43238466	43252867
Unigene0004048	chr3	43238466	43252867

## Sheet: 4
Unigene0034268	chr4	177272	188583
Unigene0004863	chr4	207220	217115
Unigene0005695	chr4	250465	257247
Unigene0050435	chr4	439441	442507
Unigene0039331	chr4	442486	445550
Unigene0085025	chr4	446485	449736
Unigene0085026	chr4	446485	449248
Unigene0039329	chr4	446511	449248
Unigene0085027	chr4	446511	449736
Unigene0014885	chr4	454309	457503
Unigene0014887	chr4	454309	456466
Unigene0011078	chr4	528326	532554
Unigene0011079	chr4	530710	532554
Unigene0045699	chr4	542459	552472
Unigene0046298	chr4	584869	587002
Unigene0007453	chr4	586981	588781
Unigene0024502	chr4	603979	610439
Unigene0032778	chr4	617393	617779
Unigene0032780	chr4	617393	617779
Unigene0084282	chr4	617393	620504
Unigene0031917	chr4	620516	620771
Unigene0008999	chr4	620760	621821
Unigene0038669	chr4	624487	624720
Unigene0038668	chr4	625016	625415
Unigene0031915	chr4	625463	626533
Unigene0074433	chr4	626594	626883
Unigene0017923	chr4	627189	627503
Unigene0077494	chr4	627810	628039
Unigene0058963	chr4	628046	628384
Unigene0002216	chr4	802097	802884
Unigene0048205	chr4	802865	804023
Unigene0022553	chr4	837447	840586
Unigene0022554	chr4	837447	840586
Unigene0022553	chr4	904104	907980
Unigene0022554	chr4	904104	907980
Unigene0038309	chr4	999164	999305
Unigene0042152	chr4	1036792	1038319
Unigene0003168	chr4	1057339	1059812
Unigene0003169	chr4	1058733	1059812
Unigene0011182	chr4	1060779	1066310
Unigene0016476	chr4	1070944	1073957
Unigene0016477	chr4	1070944	1073775
Unigene0083955	chr4	1070944	1073957
Unigene0084002	chr4	1070944	1073957
Unigene0064683	chr4	1093098	1095544
Unigene0042042	chr4	1097308	1100766
Unigene0054008	chr4	1098909	1099271
Unigene0028112	chr4	1120563	1125253
Unigene0076975	chr4	1126325	1126624
Unigene0001027	chr4	1541253	1541547
Unigene0069466	chr4	1696400	1696712
Unigene0061287	chr4	1716417	1716900
Unigene0035865	chr4	1761951	1762266
Unigene0035872	chr4	1761951	1762221
Unigene0036228	chr4	1763087	1763317
Unigene0044816	chr4	1801526	1802341
Unigene0044310	chr4	1803862	1804535
Unigene0045109	chr4	1806322	1807157
Unigene0045025	chr4	1807171	1807786
Unigene0042531	chr4	1808107	1810000
Unigene0009328	chr4	1818646	1828407
Unigene0009329	chr4	1818646	1829192
Unigene0042978	chr4	1831153	1834836
Unigene0030215	chr4	1844726	1846306
Unigene0081990	chr4	1862021	1862893
Unigene0017887	chr4	1869056	1880939
Unigene0006078	chr4	1893731	1899215
Unigene0060158	chr4	1913210	1913849
Unigene0066024	chr4	1913862	1914570
Unigene0005662	chr4	1926096	1932283
Unigene0005663	chr4	1926096	1932283
Unigene0042248	chr4	1943959	1948549
Unigene0052762	chr4	1960701	1964088
Unigene0044811	chr4	1964994	1971532
Unigene0016257	chr4	1973017	1975614
Unigene0016258	chr4	1973017	1975614
Unigene0055178	chr4	1983985	1985770
Unigene0044775	chr4	2171712	2172168
Unigene0044364	chr4	2172472	2172712
Unigene0012940	chr4	2172690	2174496
Unigene0051378	chr4	2184276	2184649
Unigene0009922	chr4	2482253	2486268
Unigene0009923	chr4	2482253	2486268
Unigene0041362	chr4	2594948	2597401
Unigene0035876	chr4	2623944	2625881
Unigene0041455	chr4	2628142	2629927
Unigene0085589	chr4	2659991	2665608
Unigene0037731	chr4	2666876	2668642
Unigene0037708	chr4	2678259	2682641
Unigene0043740	chr4	2689972	2690778
Unigene0022795	chr4	2746385	2746639
Unigene0038309	chr4	2878557	2878700
Unigene0012606	chr4	2885181	2885536
Unigene0038309	chr4	2973400	2973543
Unigene0012606	chr4	3020440	3020795
Unigene0069534	chr4	3085749	3086032
Unigene0071369	chr4	3086013	3086330
Unigene0076070	chr4	3086351	3086588
Unigene0060952	chr4	3206485	3208370
Unigene0044659	chr4	3226260	3228843
Unigene0041712	chr4	3270441	3272057
Unigene0078666	chr4	3307389	3307550
Unigene0052709	chr4	3310695	3312543
Unigene0011155	chr4	3322256	3325701
Unigene0011156	chr4	3322256	3323753
Unigene0005865	chr4	3341146	3344584
Unigene0005866	chr4	3341146	3344584
Unigene0037820	chr4	3361917	3362182
Unigene0034264	chr4	3362482	3363282
Unigene0013432	chr4	3374121	3381512
Unigene0021117	chr4	3417589	3433133
Unigene0021118	chr4	3417589	3433133
Unigene0021119	chr4	3417589	3433133
Unigene0021122	chr4	3417589	3433133
Unigene0021116	chr4	3418793	3433133
Unigene0021121	chr4	3418793	3433133
Unigene0044281	chr4	3437440	3440694
Unigene0042680	chr4	3440674	3445790
Unigene0005438	chr4	3458765	3460553
Unigene0038243	chr4	3465194	3490819
Unigene0038243	chr4	3474605	3475350
Unigene0038223	chr4	3475492	3492697
Unigene0038230	chr4	3475492	3476124
Unigene0038230	chr4	3491923	3492559
Unigene0038309	chr4	3557603	3557743
Unigene0038430	chr4	3772357	3774968
Unigene0045239	chr4	3777882	3782411
Unigene0042398	chr4	3806623	3810809
Unigene0060378	chr4	3820309	3821905
Unigene0068887	chr4	3828844	3829082
Unigene0053008	chr4	3862421	3862837
Unigene0053070	chr4	3863065	3864587
Unigene0002005	chr4	4120717	4129473
Unigene0083618	chr4	4163717	4172940
Unigene0047508	chr4	4221901	4228952
Unigene0039179	chr4	4308664	4309379
Unigene0016565	chr4	4318707	4321777
Unigene0071802	chr4	4331759	4332054
Unigene0046336	chr4	4336499	4337874
Unigene0046565	chr4	4337865	4338473
Unigene0047786	chr4	4342074	4342677
Unigene0047628	chr4	4342655	4345659
Unigene0004802	chr4	4394406	4401235
Unigene0027724	chr4	4421008	4421733
Unigene0038309	chr4	4785672	4785815
Unigene0038309	chr4	4792300	4792443
Unigene0043427	chr4	4849858	4854188
Unigene0077935	chr4	4857133	4858104
Unigene0026744	chr4	4870279	4875276
Unigene0026745	chr4	4870279	4875276
Unigene0022147	chr4	5013000	5015018
Unigene0049520	chr4	5029243	5030007
Unigene0037820	chr4	5036313	5036577
Unigene0034264	chr4	5036878	5037708
Unigene0052169	chr4	5049138	5052412
Unigene0007323	chr4	5052127	5052899
Unigene0084426	chr4	5318115	5324871
Unigene0084427	chr4	5318115	5324871
Unigene0004745	chr4	5327345	5329311
Unigene0004746	chr4	5327345	5329311
Unigene0030755	chr4	5351847	5387871
Unigene0030755	chr4	5387297	5442221
Unigene0030072	chr4	5398589	5399195
Unigene0030064	chr4	5398936	5399195
Unigene0030756	chr4	5399173	5476093
Unigene0030755	chr4	5476074	5637522
Unigene0030758	chr4	5476074	5637522
Unigene0030755	chr4	5500484	5501081
Unigene0030758	chr4	5500484	5501081
Unigene0030755	chr4	5524184	5524683
Unigene0030755	chr4	5636985	5687988
Unigene0030756	chr4	5687086	5687474
Unigene0030755	chr4	5695231	5695717
Unigene0030758	chr4	5695231	5695717
Unigene0003650	chr4	5713725	5715053
Unigene0068015	chr4	5751079	5751389
Unigene0045450	chr4	5776755	5781726
Unigene0043502	chr4	5786025	5790378
Unigene0046651	chr4	5818315	5821152
Unigene0006438	chr4	5821136	5840080
Unigene0006439	chr4	5821136	5839953
Unigene0086110	chr4	5846669	5850841
Unigene0047726	chr4	5936670	5937480
Unigene0013585	chr4	5937615	5938292
Unigene0013050	chr4	6128787	6131549
Unigene0003713	chr4	6298141	6301343
Unigene0046339	chr4	6353870	6357636
Unigene0018182	chr4	6429458	6431446
Unigene0085498	chr4	6429458	6440328
Unigene0085498	chr4	6446566	6457483
Unigene0069831	chr4	6656272	6656487
Unigene0080691	chr4	6716899	6717036
Unigene0068919	chr4	6717601	6717855
Unigene0076819	chr4	6763561	6763809
Unigene0080691	chr4	6763880	6766083
Unigene0068919	chr4	6798058	6798321
Unigene0076819	chr4	6798349	6798639
Unigene0080691	chr4	6798772	6798956
Unigene0076652	chr4	6799158	6799411
Unigene0074931	chr4	6799643	6799874
Unigene0074755	chr4	6799914	6800265
Unigene0011052	chr4	6829816	6835134
Unigene0045180	chr4	6856358	6862916
Unigene0016322	chr4	6873446	6879185
Unigene0004350	chr4	6954815	6960375
Unigene0044479	chr4	7165629	7186091
Unigene0074857	chr4	7170292	7170516
Unigene0003409	chr4	7197431	7198459
Unigene0046861	chr4	7198437	7199433
Unigene0006418	chr4	7222800	7223508
Unigene0006419	chr4	7222800	7223508
Unigene0044479	chr4	7293221	7313677
Unigene0074857	chr4	7297884	7298108
Unigene0070900	chr4	7309384	7309704
Unigene0003409	chr4	7325016	7326044
Unigene0046861	chr4	7326022	7327110
Unigene0042389	chr4	7344287	7346857
Unigene0045547	chr4	7346836	7348628
Unigene0018820	chr4	7430101	7434534
Unigene0018821	chr4	7430101	7434534
Unigene0018822	chr4	7430101	7434534
Unigene0018823	chr4	7430101	7434534
Unigene0018824	chr4	7430101	7434534
Unigene0018825	chr4	7430101	7434534
Unigene0018826	chr4	7430101	7434534
Unigene0018827	chr4	7430101	7434534
Unigene0023777	chr4	7436180	7437224
Unigene0082430	chr4	7461007	7574475
Unigene0084231	chr4	7461007	7574475
Unigene0082975	chr4	7464691	7574475
Unigene0078718	chr4	7478389	7478591
Unigene0078718	chr4	7582489	7582691
Unigene0004173	chr4	7584607	7588766
Unigene0078718	chr4	7616684	7616886
Unigene0053554	chr4	7853846	7854174
Unigene0042451	chr4	8047412	8048053
Unigene0020501	chr4	8107562	8112723
Unigene0020503	chr4	8107562	8112723
Unigene0020504	chr4	8107562	8112723
Unigene0048219	chr4	8122048	8122870
Unigene0002755	chr4	8122847	8125227
Unigene0022825	chr4	8129850	8136537
Unigene0022826	chr4	8129850	8136537
Unigene0022827	chr4	8129878	8136537
Unigene0022830	chr4	8129878	8136537
Unigene0077643	chr4	8143659	8144500
Unigene0043224	chr4	8147801	8151755
Unigene0005114	chr4	8155384	8160137
Unigene0005115	chr4	8155384	8160137
Unigene0054607	chr4	8181296	8183313
Unigene0004229	chr4	8191631	8197697
Unigene0006559	chr4	8424004	8425328
Unigene0052946	chr4	8425309	8425653
Unigene0021015	chr4	8462855	8471076
Unigene0021016	chr4	8462855	8471076
Unigene0006559	chr4	8598337	8600127
Unigene0052946	chr4	8600108	8600452
Unigene0049450	chr4	8719301	8721344
Unigene0061347	chr4	8930314	8931261
Unigene0040724	chr4	9061811	9075384
Unigene0040722	chr4	9076205	9076990
Unigene0045914	chr4	9095353	9103720
Unigene0023498	chr4	9217622	9220787
Unigene0083671	chr4	9235733	9248854
Unigene0084264	chr4	9235733	9248854
Unigene0084270	chr4	9235733	9248854
Unigene0085558	chr4	9235733	9248854
Unigene0046954	chr4	9256719	9260402
Unigene0023498	chr4	9311187	9314352
Unigene0046088	chr4	9351098	9354910
Unigene0079507	chr4	9371982	9372339
Unigene0011046	chr4	9385482	9389825
Unigene0011047	chr4	9385482	9389825
Unigene0038309	chr4	9408821	9408964
Unigene0038309	chr4	9415900	9416043
Unigene0024636	chr4	9557832	9560874
Unigene0024637	chr4	9557832	9560092
Unigene0024632	chr4	9561330	9564698
Unigene0024634	chr4	9561330	9631422
Unigene0024640	chr4	9561330	9564698
Unigene0024641	chr4	9561330	9564698
Unigene0024631	chr4	9561674	9564698
Unigene0024633	chr4	9561674	9564698
Unigene0024635	chr4	9561674	9564698
Unigene0024638	chr4	9561674	9564698
Unigene0048728	chr4	9614808	9618277
Unigene0024636	chr4	9624556	9627598
Unigene0024637	chr4	9624556	9627591
Unigene0024631	chr4	9627573	9631422
Unigene0024633	chr4	9627573	9631422
Unigene0024635	chr4	9627573	9631422
Unigene0024638	chr4	9627573	9631422
Unigene0024632	chr4	9628054	9631422
Unigene0024634	chr4	9628054	9631235
Unigene0024640	chr4	9628054	9631422
Unigene0024641	chr4	9628054	9631422
Unigene0048728	chr4	9719655	9722151
Unigene0023558	chr4	9835518	9839005
Unigene0003894	chr4	9955757	9963299
Unigene0009487	chr4	9984353	9986134
Unigene0009488	chr4	9984353	9986134
Unigene0035692	chr4	9986112	9988024
Unigene0035668	chr4	9988264	9988597
Unigene0004154	chr4	10029359	10039030
Unigene0035668	chr4	10048515	10048848
Unigene0038186	chr4	10397387	10397521
Unigene0038329	chr4	10582776	10585390
Unigene0024555	chr4	10841021	10842428
Unigene0024554	chr4	10842428	10932872
Unigene0054661	chr4	10843275	10843901
Unigene0056237	chr4	10843878	10844014
Unigene0032926	chr4	10844133	10866943
Unigene0058107	chr4	10846222	10847821
Unigene0084309	chr4	10854565	10932456
Unigene0086228	chr4	10854565	10932456
Unigene0031913	chr4	10857869	10862515
Unigene0031914	chr4	10857869	10862014
Unigene0031916	chr4	10857869	10862014
Unigene0086751	chr4	10857869	10862515
Unigene0027722	chr4	10868909	10870588
Unigene0049780	chr4	10871292	10871911
Unigene0033946	chr4	10873613	10876745
Unigene0027632	chr4	10878292	10883289
Unigene0027633	chr4	10878292	10885097
Unigene0008473	chr4	10903374	10967577
Unigene0008473	chr4	10908362	10922560
Unigene0075695	chr4	10916838	10917065
Unigene0081953	chr4	10924684	10927557
Unigene0053728	chr4	10927542	10929148
Unigene0051723	chr4	10930939	10931456
Unigene0020556	chr4	10935550	10936514
Unigene0050242	chr4	10937767	10938475
Unigene0058230	chr4	10938853	10940458
Unigene0075695	chr4	10954146	10954373
Unigene0044081	chr4	10992132	10997688
Unigene0056094	chr4	10997985	10998157
Unigene0034614	chr4	11066212	11074768
Unigene0034615	chr4	11066212	11074768
Unigene0042886	chr4	11146578	11151093
Unigene0040213	chr4	11583602	11583779
Unigene0050393	chr4	11597083	11597357
Unigene0035692	chr4	11603367	11605264
Unigene0035668	chr4	11605504	11605836
Unigene0004389	chr4	11642375	11646419
Unigene0051827	chr4	11652153	11652558
Unigene0047147	chr4	11729034	11731732
Unigene0004389	chr4	11796702	11800944
Unigene0051827	chr4	11806480	11806885
Unigene0060542	chr4	12054592	12055864
Unigene0085968	chr4	12413271	12420581
Unigene0007352	chr4	12454998	12460964
Unigene0076870	chr4	12486704	12486836
Unigene0001324	chr4	12486830	12487111
Unigene0071821	chr4	12557032	12557468
Unigene0071821	chr4	12570080	12570516
Unigene0071821	chr4	12573929	12574365
Unigene0005301	chr4	12616813	12625844
Unigene0046191	chr4	13217203	13219806
Unigene0043350	chr4	13230609	13232119
Unigene0047045	chr4	13232628	13232924
Unigene0012975	chr4	13397651	13402041
Unigene0065674	chr4	13835571	13838722
Unigene0004617	chr4	13880467	13881532
Unigene0042744	chr4	13881611	13882816
Unigene0065674	chr4	13917672	13920823
Unigene0001057	chr4	13975510	13975677
Unigene0078126	chr4	13976624	13976791
Unigene0053930	chr4	13979407	13979603
Unigene0046216	chr4	14069876	14073011
Unigene0047595	chr4	14073234	14073744
Unigene0047613	chr4	14077173	14078415
Unigene0044858	chr4	14096723	14104702
Unigene0037242	chr4	14431675	14438336
Unigene0033325	chr4	14757336	14765280
Unigene0084925	chr4	14778746	14783527
Unigene0041264	chr4	14815524	14819390
Unigene0014396	chr4	14837692	14842162
Unigene0014397	chr4	14837692	14842162
Unigene0043273	chr4	14845335	14848603
Unigene0037831	chr4	14864811	14872575
Unigene0037834	chr4	14867825	14872167
Unigene0037945	chr4	14931110	14931248
Unigene0043475	chr4	14979807	14983161
Unigene0008999	chr4	15001872	15002934
Unigene0031917	chr4	15002923	15003178
Unigene0054661	chr4	15014424	15015499
Unigene0056237	chr4	15015476	15015612
Unigene0032926	chr4	15015731	15021891
Unigene0074433	chr4	15053303	15053593
Unigene0031915	chr4	15053654	15054781
Unigene0038668	chr4	15054772	15055171
Unigene0038669	chr4	15055467	15055700
Unigene0038667	chr4	15055814	15158569
Unigene0086715	chr4	15055814	15158569
Unigene0066614	chr4	15064407	15065513
Unigene0073291	chr4	15066114	15066708
Unigene0040213	chr4	15080818	15080986
Unigene0033944	chr4	15108882	15113310
Unigene0033947	chr4	15108882	15113310
Unigene0027632	chr4	15113322	15120035
Unigene0027633	chr4	15113322	15121841
Unigene0058107	chr4	15121821	15124073
Unigene0051723	chr4	15126868	15127387
Unigene0024554	chr4	15128227	15129394
Unigene0024555	chr4	15129394	15131966
Unigene0024556	chr4	15129394	15133107
Unigene0049230	chr4	15133083	15133437
Unigene0081953	chr4	15134254	15137128
Unigene0053728	chr4	15137113	15138720
Unigene0020556	chr4	15147201	15148204
Unigene0050242	chr4	15149420	15150128
Unigene0058230	chr4	15150509	15152548
Unigene0047923	chr4	15152978	15153702
Unigene0010623	chr4	15153850	15155951
Unigene0020045	chr4	15158622	15161211
Unigene0003144	chr4	15161336	15162602
Unigene0056924	chr4	15163198	15163484
Unigene0076200	chr4	15163554	15163798
Unigene0058963	chr4	15165135	15165486
Unigene0077494	chr4	15165480	15165708
Unigene0017923	chr4	15166016	15166231
Unigene0029751	chr4	15190933	15196551
Unigene0029752	chr4	15190933	15196551
Unigene0029753	chr4	15190933	15196551
Unigene0029754	chr4	15190933	15196551
Unigene0027722	chr4	15196579	15198265
Unigene0049780	chr4	15198973	15199590
Unigene0031913	chr4	15199540	15205257
Unigene0086751	chr4	15199540	15205257
Unigene0031914	chr4	15200987	15205257
Unigene0031916	chr4	15200987	15205257
Unigene0009246	chr4	15508893	15512431
Unigene0009245	chr4	15511117	15512431
Unigene0006780	chr4	15512409	15514987
Unigene0006781	chr4	15512409	15514987
Unigene0035247	chr4	15534656	15546833
Unigene0067055	chr4	15717751	15717891
Unigene0059044	chr4	15717876	15718346
Unigene0048513	chr4	15753194	15756848
Unigene0074874	chr4	15782004	15783488
Unigene0010877	chr4	15795546	15800662
Unigene0010878	chr4	15795546	15800662
Unigene0010879	chr4	15795546	15800662
Unigene0029581	chr4	15802851	15806196
Unigene0029611	chr4	15802851	15806218
Unigene0024773	chr4	15834315	15840130
Unigene0024772	chr4	15834397	15840130
Unigene0024489	chr4	15841589	15872258
Unigene0013334	chr4	15856782	15861384
Unigene0083217	chr4	15861581	15864479
Unigene0024485	chr4	15869020	15872258
Unigene0024475	chr4	15870294	15872258
Unigene0054169	chr4	15905580	15907444
Unigene0063714	chr4	15907423	15909039
Unigene0069331	chr4	15909292	15909886
Unigene0048513	chr4	15946957	15950433
Unigene0068466	chr4	15961097	15961993
Unigene0029324	chr4	15961972	15962582
Unigene0024772	chr4	15966743	15972477
Unigene0024773	chr4	15967018	15972477
Unigene0013334	chr4	15989143	15993753
Unigene0083217	chr4	15993953	15996857
Unigene0068466	chr4	16036192	16036655
Unigene0029324	chr4	16036634	16037728
Unigene0058230	chr4	16264532	16266386
Unigene0053728	chr4	16269085	16270691
Unigene0021642	chr4	16497389	16497643
Unigene0021642	chr4	16594009	16594263
Unigene0038309	chr4	16723593	16723739
Unigene0084868	chr4	16763969	16788463
Unigene0028864	chr4	16822062	16825276
Unigene0006988	chr4	16850758	16851426
Unigene0006989	chr4	16850758	16851042
Unigene0030473	chr4	16896884	16902052
Unigene0030475	chr4	16896884	16902052
Unigene0032251	chr4	16917346	16918808
Unigene0032255	chr4	16921154	16924841
Unigene0010272	chr4	17013824	17025783
Unigene0010273	chr4	17013824	17025783
Unigene0041849	chr4	17031801	17037259
Unigene0005438	chr4	17209329	17211117
Unigene0038309	chr4	17238860	17239003
Unigene0042363	chr4	17445258	17445661
Unigene0046059	chr4	17519845	17524474
Unigene0080742	chr4	17548145	17548298
Unigene0049849	chr4	17648649	17648788
Unigene0047013	chr4	17914148	17916235
Unigene0044324	chr4	17926279	17930738
Unigene0044580	chr4	18198418	18199456
Unigene0043901	chr4	18201613	18202228
Unigene0046807	chr4	18204785	18211178
Unigene0046510	chr4	18236182	18238906
Unigene0025284	chr4	18241185	18242844
Unigene0006606	chr4	18251754	18258953
Unigene0033959	chr4	18322856	18323532
Unigene0033949	chr4	18324651	18325255
Unigene0079482	chr4	18369641	18369907
Unigene0079482	chr4	18385697	18385982
Unigene0080554	chr4	18385979	18386228
Unigene0058062	chr4	18395820	18396838
Unigene0049780	chr4	18410839	18411606
Unigene0023982	chr4	18526518	18531988
Unigene0023983	chr4	18526518	18538774
Unigene0023984	chr4	18526518	18538774
Unigene0023985	chr4	18526518	18538774
Unigene0023986	chr4	18526518	18531988
Unigene0023987	chr4	18526518	18538774
Unigene0023988	chr4	18526518	18538774
Unigene0023989	chr4	18526518	18538774
Unigene0023990	chr4	18526518	18538774
Unigene0023991	chr4	18526518	18538774
Unigene0023992	chr4	18526518	18538774
Unigene0023993	chr4	18526518	18538774
Unigene0023994	chr4	18526518	18538774
Unigene0023995	chr4	18526518	18538774
Unigene0023996	chr4	18526518	18538774
Unigene0023997	chr4	18526518	18538774
Unigene0023998	chr4	18526518	18538774
Unigene0023999	chr4	18526518	18538774
Unigene0023982	chr4	18651970	18657440
Unigene0023983	chr4	18651970	18663429
Unigene0023984	chr4	18651970	18663429
Unigene0023985	chr4	18651970	18663429
Unigene0023986	chr4	18651970	18657440
Unigene0023987	chr4	18651970	18663429
Unigene0023988	chr4	18651970	18663429
Unigene0023989	chr4	18651970	18663429
Unigene0023990	chr4	18651970	18663429
Unigene0023991	chr4	18651970	18663429
Unigene0023992	chr4	18651970	18663429
Unigene0023993	chr4	18651970	18663429
Unigene0023994	chr4	18651970	18663429
Unigene0023995	chr4	18651970	18663429
Unigene0023996	chr4	18651970	18663429
Unigene0023997	chr4	18651970	18663429
Unigene0023998	chr4	18651970	18663429
Unigene0023999	chr4	18651970	18663429
Unigene0046128	chr4	18675972	18686152
Unigene0034044	chr4	18789023	18800828
Unigene0083336	chr4	18801158	18808389
Unigene0022276	chr4	18801252	18808389
Unigene0034044	chr4	18813395	18825198
Unigene0083336	chr4	18825606	18832870
Unigene0022276	chr4	18825622	18832870
Unigene0044524	chr4	18881705	18884684
Unigene0034384	chr4	18915079	18917126
Unigene0084291	chr4	18915079	18917105
Unigene0003865	chr4	18925122	18929128
Unigene0048143	chr4	18937477	18941350
Unigene0048354	chr4	18941327	18942109
Unigene0047700	chr4	18942087	18943428
Unigene0047995	chr4	18943416	18944551
Unigene0006649	chr4	18944555	18945926
Unigene0047455	chr4	18945907	18946353
Unigene0046493	chr4	18965019	18968481
Unigene0035817	chr4	18975222	18978371
Unigene0033125	chr4	18990535	18995774
Unigene0032731	chr4	19055695	19060057
Unigene0032732	chr4	19055695	19060057
Unigene0003932	chr4	19214746	19270412
Unigene0003932	chr4	19249199	19298244
Unigene0073674	chr4	19335160	19336655
Unigene0046725	chr4	19353922	19356070
Unigene0006024	chr4	19356049	19357202
Unigene0046168	chr4	19365948	19366220
Unigene0004063	chr4	19366198	19366717
Unigene0011725	chr4	19406955	19410578
Unigene0010983	chr4	19415337	19423037
Unigene0034163	chr4	19424062	19427051
Unigene0034164	chr4	19424062	19428047
Unigene0034167	chr4	19424062	19427051
Unigene0034171	chr4	19424062	19427051
Unigene0034181	chr4	19424885	19427051
Unigene0034187	chr4	19424885	19428047
Unigene0020500	chr4	19677479	19683218
Unigene0020500	chr4	19680019	19680850
Unigene0086918	chr4	19684409	19685082
Unigene0040796	chr4	19703734	19704035
Unigene0004084	chr4	19767459	19769643
Unigene0019370	chr4	19769628	19771776
Unigene0042776	chr4	19873334	19875414
Unigene0022871	chr4	19909995	19943591
Unigene0084467	chr4	19909995	19943591
Unigene0084119	chr4	19910383	19943591
Unigene0022870	chr4	19910384	19943591
Unigene0022851	chr4	19923503	19924357
Unigene0084441	chr4	19926335	19930016
Unigene0016187	chr4	19927340	19927719
Unigene0035600	chr4	19928568	19930016
Unigene0016418	chr4	19943471	19945289
Unigene0042484	chr4	20154503	20159109
Unigene0070858	chr4	20157466	20157850
Unigene0043840	chr4	20160145	20160643
Unigene0021218	chr4	20262820	20264954
Unigene0021219	chr4	20262891	20264489
Unigene0058006	chr4	20325868	20326237
Unigene0020062	chr4	20425139	20431622
Unigene0055407	chr4	20444867	20445881
Unigene0004622	chr4	20465314	20471221
Unigene0004623	chr4	20465314	20471221
Unigene0041239	chr4	20467794	20470016
Unigene0045878	chr4	20531905	20535696
Unigene0037290	chr4	20739336	20740772
Unigene0037294	chr4	20741342	20742175
Unigene0050075	chr4	20970764	20971327
Unigene0012906	chr4	20985295	20990367
Unigene0012907	chr4	20985295	20990367
Unigene0080173	chr4	21015117	21015636
Unigene0042617	chr4	21179074	21183754
Unigene0043309	chr4	21191707	21196404
Unigene0003659	chr4	21257476	21259670
Unigene0042224	chr4	21392830	21399904
Unigene0007894	chr4	21454459	21463692
Unigene0047582	chr4	21473787	21475086
Unigene0019548	chr4	21476289	21477268
Unigene0043877	chr4	21477438	21480600
Unigene0042294	chr4	21484932	21491319
Unigene0059446	chr4	21494246	21494588
Unigene0030839	chr4	21498586	21499315
Unigene0030839	chr4	21503418	21504191
Unigene0064241	chr4	21505930	21506094
Unigene0030839	chr4	21513070	21513843
Unigene0044650	chr4	21593842	21598093
Unigene0022609	chr4	21636932	21652864
Unigene0037105	chr4	21837558	21845913
Unigene0042935	chr4	21851765	21853166
Unigene0025194	chr4	21877455	21883909
Unigene0025195	chr4	21877455	21884094
Unigene0043348	chr4	21881766	21882070
Unigene0041791	chr4	21896999	21901270
Unigene0048807	chr4	21903429	21904629
Unigene0048515	chr4	21904573	21905019
Unigene0025007	chr4	21953520	21981029
Unigene0028346	chr4	22030794	22032811
Unigene0006250	chr4	22102237	22105176
Unigene0006013	chr4	22119535	22121219
Unigene0006014	chr4	22119535	22121219
Unigene0048597	chr4	22121206	22122562
Unigene0056929	chr4	22146027	22146295
Unigene0048848	chr4	22157343	22158516
Unigene0069530	chr4	22162018	22162376
Unigene0075748	chr4	22162507	22162798
Unigene0031903	chr4	22192505	22195813
Unigene0043154	chr4	22246096	22249942
Unigene0043594	chr4	22250254	22250561
Unigene0011670	chr4	22268208	22269846
Unigene0054590	chr4	22315736	22316050
Unigene0032847	chr4	22323509	22324660
Unigene0001131	chr4	22328099	22328422
Unigene0041741	chr4	22346196	22356822
Unigene0067258	chr4	22347120	22347327
Unigene0041441	chr4	22361801	22367076
Unigene0031969	chr4	22380097	22381989
Unigene0031970	chr4	22383371	22387173
Unigene0046833	chr4	22427362	22427996
Unigene0046837	chr4	22427859	22428882
Unigene0005084	chr4	22428854	22430683
Unigene0049058	chr4	22431399	22431558
Unigene0002640	chr4	22432262	22433150
Unigene0002641	chr4	22432262	22433150
Unigene0019497	chr4	22433949	22438875
Unigene0028075	chr4	22458139	22463955
Unigene0028076	chr4	22458139	22463955
Unigene0028077	chr4	22458139	22463955
Unigene0028078	chr4	22458139	22461003
Unigene0028080	chr4	22458139	22463955
Unigene0028081	chr4	22458139	22461003
Unigene0028084	chr4	22458139	22463955
Unigene0028086	chr4	22458139	22461003
Unigene0032256	chr4	22519001	22525620
Unigene0032257	chr4	22519001	22569160
Unigene0032259	chr4	22519001	22525620
Unigene0032260	chr4	22519001	22583031
Unigene0032260	chr4	22519793	22569160
Unigene0045562	chr4	22525672	22525910
Unigene0078844	chr4	22529869	22567197
Unigene0038309	chr4	22542716	22542859
Unigene0038309	chr4	22549539	22549682
Unigene0032260	chr4	22556295	22559991
Unigene0068465	chr4	22556571	22556798
Unigene0048622	chr4	22567202	22567654
Unigene0032258	chr4	22569124	22585483
Unigene0048622	chr4	22582159	22582617
Unigene0042177	chr4	22612296	22618812
Unigene0044359	chr4	22620112	22621348
Unigene0031403	chr4	22620671	22624193
Unigene0031408	chr4	22620671	22624095
Unigene0015640	chr4	22632724	22634331
Unigene0031443	chr4	22676010	22803546
Unigene0047523	chr4	22677373	22678187
Unigene0044866	chr4	22683813	22691640
Unigene0067211	chr4	22703277	22703767
Unigene0013050	chr4	22734634	22737373
Unigene0032776	chr4	22807041	22810464
Unigene0041799	chr4	22807369	22808768
Unigene0051384	chr4	22809910	22826894
Unigene0041666	chr4	22810299	22810536
Unigene0032776	chr4	22818423	22827335
Unigene0079743	chr4	22819856	22820059
Unigene0013928	chr4	22821632	22821864
Unigene0001572	chr4	22822422	22822759
Unigene0027768	chr4	22823037	22823791
Unigene0085906	chr4	22824950	22825533
Unigene0044445	chr4	22835392	22841113
Unigene0015399	chr4	22874159	22923131
Unigene0015400	chr4	22874159	22879128
Unigene0038023	chr4	22881618	22883939
Unigene0041414	chr4	22884565	22887588
Unigene0015399	chr4	22918163	22921687
Unigene0015400	chr4	22918163	22923131
Unigene0038023	chr4	22925621	22927942
Unigene0041414	chr4	22928568	22931545
Unigene0043608	chr4	22952733	22954750
Unigene0041831	chr4	22963876	22966912
Unigene0027554	chr4	23001134	23003439
Unigene0027557	chr4	23001134	23002438
Unigene0027559	chr4	23001134	23002438
Unigene0027560	chr4	23001134	23003439
Unigene0027555	chr4	23001816	23002438
Unigene0011476	chr4	23198027	23208306
Unigene0034506	chr4	23213487	23213942
Unigene0009292	chr4	23215673	23220716
Unigene0009293	chr4	23215673	23220724
Unigene0046759	chr4	23295406	23296601
Unigene0042585	chr4	23297977	23301055
Unigene0079924	chr4	23319751	23320254
Unigene0053728	chr4	23362460	23364991
Unigene0082386	chr4	23367050	23373792
Unigene0041465	chr4	23388274	23396059
Unigene0031924	chr4	23621008	23634990
Unigene0085029	chr4	23622941	23634990
Unigene0031923	chr4	23631366	23634990
Unigene0086359	chr4	23642847	23647152
Unigene0043118	chr4	23652247	23656891
Unigene0038309	chr4	23673465	23673608
Unigene0001918	chr4	23692738	23695044
Unigene0041374	chr4	23711210	23725798
Unigene0007714	chr4	23784230	24125179
Unigene0012040	chr4	23805247	23918158
Unigene0012041	chr4	23805247	23918158
Unigene0012040	chr4	23808168	23820400
Unigene0012041	chr4	23808168	23820400
Unigene0041947	chr4	23834606	23838787
Unigene0040042	chr4	23840128	23842193
Unigene0008399	chr4	23883079	23885628
Unigene0008400	chr4	23883079	23885628
Unigene0041947	chr4	23934004	23938205
Unigene0042828	chr4	23973383	23979731
Unigene0044112	chr4	23981700	23986991
Unigene0016222	chr4	24031143	24033289
Unigene0016223	chr4	24031143	24033289
Unigene0016224	chr4	24031143	24033289
Unigene0016225	chr4	24031143	24033289
Unigene0046595	chr4	24078989	24082955
Unigene0038442	chr4	24132816	24149077
Unigene0018696	chr4	24155300	24157391
Unigene0007714	chr4	24176414	24600445
Unigene0036564	chr4	24198412	24198702
Unigene0041950	chr4	24198432	24198702
Unigene0013120	chr4	24498987	24505166
Unigene0013121	chr4	24498987	24505166
Unigene0013122	chr4	24498987	24505166
Unigene0008876	chr4	24549792	24651756
Unigene0081849	chr4	24555376	24564137
Unigene0023549	chr4	24560251	24560811
Unigene0021227	chr4	24566748	24573931
Unigene0021231	chr4	24566748	24572719
Unigene0021226	chr4	24569876	24573931
Unigene0021230	chr4	24569876	24572719
Unigene0028089	chr4	24609136	24611185
Unigene0028092	chr4	24609136	24611185
Unigene0028093	chr4	24609136	24611185
Unigene0081849	chr4	24655328	24664089
Unigene0023549	chr4	24660203	24660765
Unigene0021227	chr4	24666700	24673883
Unigene0021231	chr4	24666700	24672671
Unigene0021226	chr4	24669828	24673883
Unigene0021230	chr4	24669828	24672671
Unigene0028092	chr4	24724320	24726369
Unigene0028093	chr4	24724320	24726369
Unigene0042130	chr4	24764869	24768174
Unigene0049176	chr4	24773611	24775112
Unigene0073558	chr4	24839230	24840362
Unigene0078438	chr4	24840345	24840750
Unigene0062533	chr4	24841415	24842196
Unigene0076348	chr4	24842854	24843167
Unigene0061133	chr4	24843147	24844155
Unigene0042196	chr4	24852584	24869444
Unigene0041506	chr4	24872264	24877049
Unigene0041541	chr4	24881653	24884576
Unigene0008877	chr4	24941499	24948270
Unigene0008878	chr4	24941499	24948270
Unigene0022097	chr4	24958581	24964117
Unigene0022099	chr4	24958581	24964117
Unigene0022095	chr4	24962626	24964117
Unigene0045078	chr4	24967431	24970021
Unigene0085906	chr4	25189516	25190099
Unigene0027768	chr4	25191259	25195487
Unigene0076473	chr4	25193228	25193524
Unigene0001572	chr4	25195765	25196102
Unigene0013928	chr4	25196705	25196892
Unigene0004698	chr4	25213084	25217832
Unigene0004699	chr4	25213467	25217832
Unigene0010717	chr4	25221533	25229133
Unigene0010716	chr4	25221919	25229133
Unigene0078211	chr4	25224959	25225097
Unigene0012846	chr4	25280713	25284340
Unigene0024810	chr4	25295035	25307106
Unigene0024811	chr4	25295035	25307106
Unigene0029672	chr4	25319226	25324987
Unigene0029674	chr4	25319226	25324987
Unigene0018745	chr4	25334221	25339560
Unigene0018746	chr4	25334221	25339560
Unigene0044819	chr4	25355691	25362650
Unigene0044819	chr4	25375438	25380371
Unigene0018745	chr4	25398690	25404029
Unigene0018746	chr4	25398690	25404029
Unigene0029672	chr4	25413263	25419024
Unigene0029674	chr4	25413263	25419024
Unigene0047100	chr4	25455038	25455881
Unigene0026783	chr4	25456880	25457041
Unigene0044376	chr4	25471029	25475461
Unigene0022124	chr4	25481562	25543554
Unigene0022125	chr4	25481562	25487116
Unigene0022128	chr4	25481562	25487116
Unigene0022129	chr4	25481562	25543554
Unigene0022124	chr4	25483560	25487116
Unigene0022126	chr4	25483560	25487116
Unigene0022127	chr4	25483560	25487116
Unigene0022129	chr4	25483560	25487116
Unigene0044212	chr4	25502986	25507077
Unigene0022125	chr4	25539998	25543554
Unigene0022128	chr4	25539998	25543554
Unigene0045839	chr4	25601720	25605841
Unigene0044071	chr4	25609072	25612957
Unigene0003045	chr4	25622641	25624134
Unigene0002347	chr4	25624111	25625064
Unigene0086834	chr4	25628804	25632963
Unigene0042098	chr4	25633899	25638440
Unigene0029750	chr4	25646988	25651964
Unigene0029747	chr4	25651285	25651964
Unigene0029749	chr4	25652007	25655422
Unigene0011239	chr4	25665103	25665964
Unigene0033914	chr4	25714485	25716892
Unigene0033924	chr4	25714485	25716892
Unigene0084348	chr4	25714485	25716855
Unigene0084854	chr4	25714485	25716855
Unigene0006362	chr4	25734367	25739014
Unigene0080226	chr4	25750959	25774530
Unigene0080226	chr4	25774356	25774507
Unigene0084211	chr4	25791680	25797628
Unigene0084228	chr4	25791680	25797628
Unigene0006362	chr4	25854289	25858936
Unigene0080226	chr4	25870881	25871055
Unigene0003760	chr4	25935646	25936596
Unigene0022872	chr4	26008063	26017332
Unigene0047281	chr4	26045157	26047323
Unigene0057304	chr4	26074959	26075372
Unigene0056143	chr4	26075476	26075679
Unigene0074513	chr4	26098765	26100282
Unigene0022872	chr4	26127430	26136379
Unigene0047281	chr4	26164204	26166370
Unigene0074513	chr4	26204330	26206219
Unigene0011277	chr4	26267934	26274051
Unigene0047857	chr4	26298061	26300154
Unigene0005763	chr4	26300135	26300434
Unigene0044355	chr4	26307164	26319598
Unigene0054965	chr4	26371499	26372137
Unigene0080954	chr4	26419588	26419807
Unigene0054965	chr4	26532829	26533467
Unigene0039319	chr4	26534784	26538804
Unigene0043325	chr4	26552397	26556244
Unigene0045448	chr4	26557616	26557935
Unigene0045486	chr4	26558619	26558867
Unigene0046669	chr4	26561949	26563516
Unigene0079175	chr4	26593658	26593840
Unigene0012145	chr4	26630215	26643378
Unigene0012146	chr4	26630215	26643378
Unigene0042331	chr4	26693936	26694505
Unigene0041369	chr4	26696267	26696502
Unigene0005592	chr4	26704089	26709468
Unigene0004244	chr4	26717649	26721367
Unigene0043760	chr4	26735598	26740940
Unigene0042985	chr4	26791506	26797906
Unigene0048788	chr4	26821243	26825427
Unigene0086109	chr4	26886995	26893221
Unigene0014675	chr4	26900833	26914453
Unigene0014676	chr4	26900833	26914453
Unigene0048788	chr4	26973774	26977958
Unigene0009932	chr4	27077763	27083366
Unigene0058970	chr4	27078249	27079141
Unigene0019908	chr4	27087168	27095346
Unigene0019909	chr4	27087168	27095389
Unigene0042453	chr4	27103854	27104672
Unigene0066338	chr4	27124293	27124555
Unigene0013012	chr4	27137719	27157916
Unigene0042308	chr4	27137788	27158154
Unigene0011371	chr4	27183257	27192289
Unigene0066338	chr4	27198774	27199036
Unigene0042296	chr4	27238030	27240648
Unigene0069488	chr4	27250257	27250884
Unigene0057756	chr4	27250881	27252709
Unigene0059702	chr4	27252873	27254301
Unigene0055943	chr4	27254284	27255231
Unigene0076591	chr4	27275454	27275689
Unigene0001828	chr4	27322538	27326329
Unigene0001829	chr4	27323402	27326329
Unigene0081768	chr4	27326455	27329186
Unigene0042786	chr4	27350419	27352382
Unigene0049744	chr4	27360898	27362416
Unigene0049489	chr4	27362532	27363091
Unigene0042714	chr4	27384733	27387154
Unigene0021866	chr4	27500652	27502374
Unigene0045724	chr4	27619363	27619801
Unigene0044636	chr4	27619779	27620187
Unigene0011929	chr4	27716400	27724662
Unigene0011930	chr4	27716400	27724662
Unigene0055841	chr4	27983936	27984175
Unigene0048733	chr4	28001178	28001664
Unigene0049553	chr4	28005221	28005727
Unigene0024864	chr4	28030922	28035119
Unigene0014390	chr4	28201329	28207956
Unigene0084510	chr4	28201329	28207956
Unigene0048642	chr4	28207938	28208882
Unigene0034233	chr4	28226976	28229554
Unigene0024744	chr4	28248009	28251501
Unigene0024745	chr4	28251493	28253755
Unigene0058071	chr4	28253021	28253440
Unigene0048615	chr4	28264664	28265465
Unigene0045247	chr4	28280899	28282069
Unigene0027416	chr4	28283826	28284531
Unigene0027417	chr4	28283826	28284724
Unigene0027418	chr4	28283826	28284724
Unigene0027419	chr4	28283826	28284531
Unigene0027420	chr4	28283826	28284724
Unigene0027421	chr4	28283826	28284724
Unigene0008859	chr4	28291367	28293602
Unigene0008861	chr4	28291367	28293602
Unigene0008898	chr4	28318759	28320746
Unigene0008899	chr4	28318759	28320746
Unigene0084830	chr4	28321029	28330088
Unigene0087036	chr4	28321029	28330088
Unigene0042020	chr4	28344094	28348502
Unigene0008543	chr4	28387856	28391449
Unigene0045022	chr4	28388408	28388681
Unigene0045534	chr4	28388942	28389484
Unigene0045022	chr4	28394686	28394959
Unigene0045534	chr4	28395220	28395750
Unigene0035986	chr4	28443757	28456351
Unigene0035987	chr4	28443757	28456351
Unigene0035993	chr4	28443757	28456351
Unigene0035996	chr4	28443757	28456258
Unigene0036005	chr4	28443757	28456258
Unigene0036014	chr4	28443757	28456258
Unigene0036024	chr4	28443757	28456351
Unigene0036025	chr4	28443757	28456258
Unigene0035985	chr4	28445074	28456258
Unigene0035991	chr4	28445074	28456258
Unigene0036001	chr4	28445074	28456351
Unigene0036016	chr4	28445074	28456351
Unigene0041742	chr4	28514329	28520055
Unigene0002379	chr4	28595251	28597348
Unigene0052805	chr4	28617023	28620561
Unigene0024762	chr4	28623717	28629516
Unigene0024763	chr4	28623717	28629516
Unigene0043869	chr4	28648928	28652851
Unigene0038309	chr4	28717414	28717554
Unigene0043869	chr4	28749607	28755660
Unigene0018786	chr4	28768039	28774989
Unigene0018788	chr4	28768039	28774989
Unigene0014582	chr4	28797826	28803192
Unigene0014583	chr4	28797826	28803192
Unigene0014584	chr4	28797826	28803192
Unigene0014585	chr4	28797826	28803192
Unigene0014586	chr4	28797826	28803192
Unigene0014587	chr4	28797826	28803192
Unigene0006711	chr4	28815477	28818278
Unigene0010421	chr4	28862472	28868963
Unigene0010422	chr4	28862472	28866041
Unigene0044437	chr4	28873558	28890031
Unigene0043572	chr4	28906626	28908191
Unigene0001902	chr4	28907142	28907410
Unigene0042194	chr4	28924047	28925950
Unigene0017888	chr4	28935572	28936943
Unigene0017889	chr4	28935572	28939400
Unigene0017890	chr4	28935572	28939400
Unigene0042194	chr4	28993631	28995534
Unigene0045615	chr4	29223435	29225513
Unigene0040114	chr4	29258860	29264577
Unigene0004402	chr4	29267894	29274212
Unigene0041522	chr4	29294848	29296310
Unigene0086571	chr4	29315952	29319335
Unigene0086570	chr4	29315978	29319335
Unigene0026616	chr4	29316996	29317260
Unigene0026617	chr4	29316996	29319335
Unigene0081934	chr4	29401428	29406997
Unigene0002596	chr4	29405843	29406049
Unigene0043093	chr4	29431283	29434980
Unigene0066436	chr4	29500577	29501137
Unigene0009639	chr4	29550812	29556759
Unigene0005602	chr4	29613347	29617604
Unigene0048655	chr4	29617741	29618425
Unigene0006414	chr4	29624906	29635297
Unigene0005295	chr4	29668881	29686621
Unigene0007867	chr4	29693228	29711807
Unigene0007867	chr4	29693248	29700207
Unigene0013930	chr4	29713580	29718010
Unigene0013932	chr4	29713580	29718010
Unigene0048990	chr4	29771090	29772140
Unigene0041713	chr4	29779833	29784279
Unigene0042673	chr4	29808497	29814028
Unigene0081550	chr4	29851775	29855332
Unigene0086614	chr4	29851775	29855332
Unigene0033283	chr4	29852052	29853282
Unigene0033280	chr4	29852682	29853877
Unigene0033281	chr4	29852682	29855332
Unigene0033282	chr4	29852682	29853282
Unigene0025189	chr4	29883687	29888937
Unigene0025190	chr4	29883687	29889396
Unigene0025191	chr4	29883687	29889396
Unigene0025192	chr4	29883687	29888937
Unigene0003069	chr4	29923772	29927071
Unigene0003070	chr4	29923772	29927071
Unigene0033281	chr4	29950696	29953262
Unigene0081550	chr4	29950696	29953131
Unigene0086614	chr4	29950696	29953094
Unigene0033280	chr4	29952067	29953262
Unigene0033282	chr4	29952662	29953262
Unigene0025985	chr4	29953417	29958397
Unigene0086250	chr4	29958171	29967987
Unigene0068957	chr4	29993070	29993424
Unigene0086250	chr4	30025715	30035468
Unigene0068957	chr4	30060612	30060966
Unigene0023255	chr4	30144966	30154978
Unigene0073163	chr4	30150696	30151583
Unigene0042700	chr4	30169803	30174534
Unigene0020579	chr4	30182461	30187267
Unigene0004285	chr4	30188573	30191292
Unigene0020047	chr4	30193355	30204891
Unigene0020048	chr4	30193355	30204891
Unigene0020049	chr4	30193355	30204891
Unigene0020051	chr4	30193355	30204891
Unigene0020052	chr4	30193355	30204891
Unigene0020053	chr4	30193355	30204891
Unigene0020054	chr4	30193355	30204891
Unigene0020055	chr4	30193355	30204891
Unigene0041750	chr4	30269239	30272315
Unigene0041777	chr4	30304635	30310049
Unigene0004356	chr4	30315385	30327746
Unigene0045862	chr4	30338621	30341843
Unigene0042377	chr4	30356083	30362544
Unigene0007143	chr4	30366237	30371863
Unigene0009811	chr4	30370742	30371652
Unigene0004011	chr4	30425207	30430590
Unigene0004012	chr4	30425207	30430590
Unigene0079525	chr4	30873884	30874064
Unigene0079659	chr4	30874606	30874811
Unigene0058486	chr4	30893805	30896514
Unigene0018001	chr4	30909441	30912465
Unigene0018003	chr4	30909441	30912739
Unigene0009218	chr4	30916257	30921820
Unigene0054335	chr4	30974090	30974223
Unigene0044507	chr4	31026303	31028100
Unigene0003201	chr4	31055348	31056058
Unigene0012727	chr4	31056037	31058585
Unigene0005079	chr4	31060422	31072333
Unigene0005080	chr4	31060422	31072333
Unigene0065987	chr4	31085845	31086289
Unigene0032152	chr4	31117514	31121966
Unigene0032157	chr4	31117514	31121966
Unigene0032155	chr4	31120741	31121966
Unigene0021446	chr4	31124262	31133587
Unigene0021447	chr4	31124262	31133587
Unigene0021449	chr4	31124262	31133587
Unigene0021451	chr4	31124262	31133587
Unigene0076613	chr4	31130556	31130812
Unigene0021448	chr4	31133217	31134063
Unigene0043330	chr4	31201344	31205852
Unigene0042982	chr4	31302631	31302844
Unigene0043729	chr4	31312451	31313706
Unigene0082448	chr4	31334839	31337105
Unigene0048900	chr4	31337083	31338013
Unigene0021730	chr4	31370290	31370714
Unigene0030700	chr4	31446387	31452738
Unigene0030700	chr4	31451627	31465971
Unigene0030700	chr4	31474961	31476235
Unigene0030700	chr4	31482738	31483698
Unigene0008555	chr4	31783995	31792282
Unigene0008554	chr4	31790187	31792282
Unigene0003305	chr4	31797903	31800058
Unigene0046353	chr4	31815507	31816265
Unigene0046034	chr4	31816248	31818568
Unigene0005024	chr4	31834569	31842068
Unigene0005025	chr4	31834569	31842068
Unigene0045524	chr4	31846285	31853667
Unigene0017309	chr4	31859636	31862550
Unigene0006032	chr4	31859688	31860609
Unigene0010469	chr4	31863376	31873892
Unigene0010470	chr4	31863376	31873892
Unigene0010471	chr4	31863376	31873892
Unigene0010472	chr4	31863376	31873892
Unigene0007198	chr4	31883486	31887539
Unigene0007199	chr4	31883486	31887539
Unigene0013896	chr4	31889415	31895555
Unigene0013897	chr4	31889415	31895555
Unigene0083364	chr4	31889415	31895555
Unigene0083770	chr4	31889415	31895555
Unigene0074140	chr4	31992124	31992627
Unigene0074140	chr4	31994060	31994573
Unigene0062726	chr4	31994832	31995654
Unigene0079788	chr4	32002463	32002731
Unigene0079788	chr4	32012597	32012865
Unigene0015506	chr4	32068962	32069144
Unigene0005090	chr4	32101752	32105380
Unigene0005091	chr4	32101752	32105380
Unigene0004075	chr4	32105365	32111020
Unigene0074140	chr4	32135243	32135746
Unigene0074140	chr4	32137178	32137691
Unigene0062726	chr4	32137950	32138772
Unigene0079788	chr4	32145580	32145848
Unigene0079788	chr4	32155714	32155982
Unigene0020118	chr4	32168991	32173553
Unigene0041708	chr4	32195527	32202467
Unigene0041708	chr4	32199469	32202238
Unigene0011271	chr4	32204067	32210665
Unigene0028604	chr4	32210637	32210910
Unigene0028603	chr4	32210996	32213226
Unigene0044713	chr4	32219412	32221064
Unigene0005090	chr4	32291345	32294973
Unigene0005091	chr4	32291345	32294973
Unigene0004075	chr4	32294958	32300614
Unigene0052255	chr4	32326902	32327227
Unigene0052987	chr4	32338666	32339617
Unigene0053915	chr4	32339753	32340417
Unigene0052119	chr4	32340399	32341797
Unigene0046392	chr4	32351638	32356081
Unigene0077252	chr4	32396366	32397543
Unigene0078777	chr4	32408187	32408852
Unigene0067590	chr4	32409740	32410215
Unigene0071537	chr4	32410201	32410843
Unigene0065749	chr4	32410829	32411390
Unigene0026556	chr4	32454893	32459019
Unigene0023416	chr4	32470473	32474311
Unigene0047047	chr4	32484782	32485518
Unigene0009947	chr4	32485549	32490002
Unigene0071410	chr4	32488259	32488485
Unigene0004916	chr4	32545483	32550821
Unigene0050115	chr4	32760360	32762374
Unigene0028957	chr4	32762795	32764167
Unigene0068376	chr4	32786374	32786659
Unigene0004536	chr4	32835552	32841035
Unigene0011384	chr4	32843615	32845151
Unigene0011385	chr4	32843615	32845469
Unigene0052862	chr4	32852823	32855676
Unigene0052851	chr4	32898443	32899843
Unigene0023066	chr4	33108061	33113381
Unigene0023068	chr4	33108061	33113381
Unigene0023072	chr4	33108061	33113381
Unigene0041528	chr4	33135527	33141864
Unigene0012300	chr4	33179045	33182271
Unigene0012301	chr4	33179045	33182271
Unigene0043207	chr4	33216136	33221118
Unigene0016604	chr4	33243094	33245319
Unigene0016606	chr4	33243094	33245319
Unigene0016605	chr4	33245018	33245319
Unigene0046013	chr4	33252931	33265295
Unigene0027563	chr4	33446965	33448572
Unigene0027566	chr4	33446965	33448572
Unigene0046741	chr4	33500290	33502739
Unigene0037616	chr4	33518159	33518745
Unigene0037616	chr4	33527456	33528052
Unigene0013901	chr4	33660498	33661127
Unigene0022461	chr4	33670637	33674450
Unigene0020459	chr4	33733798	33733927
Unigene0020460	chr4	33733798	33735578
Unigene0020459	chr4	33743265	33743422
Unigene0020460	chr4	33743265	33745654
Unigene0020459	chr4	33753339	33753468
Unigene0047500	chr4	33801513	33801932
Unigene0013277	chr4	33801915	33803210
Unigene0045581	chr4	33947240	33948202
Unigene0048861	chr4	33970643	33971098
Unigene0063288	chr4	33979553	33980649
Unigene0047637	chr4	34159665	34162280
Unigene0012857	chr4	34196740	34197836
Unigene0084066	chr4	34196740	34197836
Unigene0039233	chr4	34225439	34225693
Unigene0043563	chr4	34254180	34258840
Unigene0002132	chr4	34286633	34287245
Unigene0069032	chr4	34290500	34291859
Unigene0068894	chr4	34291866	34292366
Unigene0010069	chr4	34298165	34302239
Unigene0014803	chr4	34531980	34535048
Unigene0014804	chr4	34531980	34535048
Unigene0041963	chr4	34537835	34543056
Unigene0044980	chr4	34610811	34614387
Unigene0043638	chr4	34679527	34683033
Unigene0005043	chr4	34687240	34688662
Unigene0005044	chr4	34688132	34688662
Unigene0044438	chr4	34689337	34693363
Unigene0056580	chr4	34691545	34692331
Unigene0044912	chr4	34693344	34694033
Unigene0015847	chr4	34729714	34735358
Unigene0030942	chr4	34736893	34742089
Unigene0003902	chr4	34746253	34749333
Unigene0027879	chr4	34774354	34779159
Unigene0031156	chr4	34818025	34819726
Unigene0050289	chr4	34820016	34820516
Unigene0049483	chr4	34820503	34822021
Unigene0013123	chr4	34822003	34824456
Unigene0013124	chr4	34822003	34823002
Unigene0019171	chr4	34834096	34836781
Unigene0084929	chr4	34834096	34840742
Unigene0046072	chr4	34847398	34853966
Unigene0041783	chr4	34860878	34864369
Unigene0082466	chr4	34871569	34877538
Unigene0082897	chr4	34871569	34877538
Unigene0084276	chr4	34871569	34877538
Unigene0084797	chr4	34871569	34877538
Unigene0085551	chr4	34871569	34877538
Unigene0086230	chr4	34871569	34877538
Unigene0081911	chr4	34871773	34877538
Unigene0082475	chr4	34871773	34877538
Unigene0083644	chr4	34871773	34877538
Unigene0083645	chr4	34871773	34877538
Unigene0084271	chr4	34871773	34877538
Unigene0087007	chr4	34871773	34877538
Unigene0041211	chr4	34887591	34892955
Unigene0044192	chr4	34888007	34888549
Unigene0027816	chr4	34904281	34905042
Unigene0027818	chr4	34904281	34909649
Unigene0027813	chr4	34904417	34909649
Unigene0027814	chr4	34904417	34905042
Unigene0077901	chr4	34914424	34914668
Unigene0077105	chr4	34920824	34921053
Unigene0077901	chr4	34921495	34921749
Unigene0042548	chr4	34927516	34929788
Unigene0046992	chr4	34930940	34934565
Unigene0004144	chr4	35129865	35135023
Unigene0042679	chr4	35143790	35148516
Unigene0042000	chr4	35154562	35159014
Unigene0043485	chr4	35165296	35167309
Unigene0002375	chr4	35185821	35185999
Unigene0019982	chr4	35185976	35189149
Unigene0071510	chr4	35211743	35212427
Unigene0042717	chr4	35226653	35229837
Unigene0060361	chr4	35246012	35246634
Unigene0010201	chr4	35267005	35271484
Unigene0010202	chr4	35267005	35271484
Unigene0010203	chr4	35267005	35271484
Unigene0010204	chr4	35267005	35271484
Unigene0079229	chr4	35285670	35285945
Unigene0023831	chr4	35286515	35294550
Unigene0023833	chr4	35286515	35294550
Unigene0020496	chr4	35420133	35434849
Unigene0020499	chr4	35420133	35435138
Unigene0020495	chr4	35425175	35434849
Unigene0020498	chr4	35425175	35435138
Unigene0050454	chr4	35814133	35819167
Unigene0019016	chr4	35831736	35834279
Unigene0019014	chr4	35832682	35834279
Unigene0010617	chr4	35858156	35865332
Unigene0048173	chr4	35866322	35867362
Unigene0083409	chr4	35867713	35871425
Unigene0042833	chr4	35924668	35926558
Unigene0041277	chr4	35972772	35977515
Unigene0077943	chr4	36063319	36063570
Unigene0072534	chr4	36063591	36064013
Unigene0074318	chr4	36064011	36064424
Unigene0041424	chr4	36066048	36070506
Unigene0078213	chr4	36086639	36086888
Unigene0020485	chr4	36087380	36096275
Unigene0020486	chr4	36087380	36096275
Unigene0020487	chr4	36087380	36096275
Unigene0020488	chr4	36087380	36096275
Unigene0041952	chr4	36097375	36164774
Unigene0041952	chr4	36161530	36163078
Unigene0042043	chr4	36219592	36221066
Unigene0042366	chr4	36245323	36249614
Unigene0018207	chr4	36411124	36416400
Unigene0018208	chr4	36411124	36414617
Unigene0018209	chr4	36411124	36414617
Unigene0018210	chr4	36411124	36416400
Unigene0018211	chr4	36411124	36416400
Unigene0018212	chr4	36411124	36416400
Unigene0018213	chr4	36411124	36416400
Unigene0018214	chr4	36411124	36414617
Unigene0018215	chr4	36411124	36414617
Unigene0018216	chr4	36411124	36416400
Unigene0009332	chr4	36437709	36442597
Unigene0064419	chr4	36466501	36466854
Unigene0041826	chr4	36478727	36479970
Unigene0041517	chr4	36479957	36481300
Unigene0005591	chr4	36512780	36514864
Unigene0084121	chr4	36526425	36526878
Unigene0011873	chr4	36556966	36560978
Unigene0011874	chr4	36556966	36560993
Unigene0043251	chr4	36568579	36576529
Unigene0016938	chr4	36589988	36596460
Unigene0016933	chr4	36590023	36596460
Unigene0016934	chr4	36591593	36596460
Unigene0041246	chr4	36641367	36645919
Unigene0026204	chr4	36649549	36654811
Unigene0026210	chr4	36649549	36654799
Unigene0058968	chr4	36660188	36661539
Unigene0060656	chr4	36665900	36668269
Unigene0068922	chr4	36668126	36668294
Unigene0046384	chr4	36694823	36699042
Unigene0044080	chr4	36705526	36711051
Unigene0036623	chr4	36731063	36735334
Unigene0047015	chr4	36749945	36752760
Unigene0057483	chr4	36953266	36954795
Unigene0045553	chr4	36969263	36973261
Unigene0022315	chr4	36999713	37003788
Unigene0084388	chr4	36999713	37003788
Unigene0031391	chr4	37015522	37015706
Unigene0031390	chr4	37021429	37022377
Unigene0031391	chr4	37022783	37022995
Unigene0031391	chr4	37026032	37026234
Unigene0031390	chr4	37026695	37027595
Unigene0031387	chr4	37042920	37072858
Unigene0031390	chr4	37042920	37072858
Unigene0031391	chr4	37044509	37044861
Unigene0047776	chr4	37044791	37074132
Unigene0031391	chr4	37073448	37073660
Unigene0031390	chr4	37081608	37082548
Unigene0031391	chr4	37083041	37083392
Unigene0077752	chr4	37084905	37085171
Unigene0024201	chr4	37101952	37110198
Unigene0024202	chr4	37101952	37110198
Unigene0024203	chr4	37101952	37110198
Unigene0024205	chr4	37101952	37110198
Unigene0024206	chr4	37101952	37110198
Unigene0024207	chr4	37101952	37110198
Unigene0024208	chr4	37101952	37105633
Unigene0085070	chr4	37101952	37110198
Unigene0086490	chr4	37101952	37110198
Unigene0005469	chr4	37123467	37130739
Unigene0043118	chr4	37155495	37159699
Unigene0040068	chr4	37169029	37170110
Unigene0040070	chr4	37169029	37170020
Unigene0040071	chr4	37169029	37170130
Unigene0038283	chr4	37179159	37179367
Unigene0038281	chr4	37179589	37180116
Unigene0041903	chr4	37187241	37191316
Unigene0041283	chr4	37211364	37218415
Unigene0036037	chr4	37271729	37304399
Unigene0036030	chr4	37281556	37282200
Unigene0036031	chr4	37282292	37319832
Unigene0036037	chr4	37286061	37286576
Unigene0035668	chr4	37292172	37292463
Unigene0036030	chr4	37299352	37299971
Unigene0036030	chr4	37316817	37317508
Unigene0036037	chr4	37320642	37321156
Unigene0036035	chr4	37321852	37322314
Unigene0009098	chr4	37378559	37381491
Unigene0009098	chr4	37459981	37462913
Unigene0052384	chr4	37501857	37503105
Unigene0045811	chr4	37506225	37509545
Unigene0079556	chr4	37712242	37712428
Unigene0039952	chr4	37753444	37756495
Unigene0039976	chr4	37753444	37756495
Unigene0082053	chr4	37775606	37777395
Unigene0018820	chr4	37780364	37784406
Unigene0018821	chr4	37780364	37784406
Unigene0018822	chr4	37780364	37784406
Unigene0018823	chr4	37780364	37784406
Unigene0018824	chr4	37780364	37784406
Unigene0018825	chr4	37780364	37784406
Unigene0018826	chr4	37780364	37784406
Unigene0018827	chr4	37780364	37784406
Unigene0030749	chr4	37795520	37796774
Unigene0030751	chr4	37795524	37796774
Unigene0030748	chr4	37795529	37796774
Unigene0030752	chr4	37797933	37801789
Unigene0074366	chr4	37858711	37859109
Unigene0006248	chr4	37863121	37866468
Unigene0044384	chr4	37872633	37875100
Unigene0039952	chr4	37927448	37930499
Unigene0039976	chr4	37927448	37930499
Unigene0082053	chr4	37949608	37951397
Unigene0018820	chr4	37954366	37958408
Unigene0018821	chr4	37954366	37958408
Unigene0018822	chr4	37954366	37958408
Unigene0018823	chr4	37954366	37958408
Unigene0018824	chr4	37954366	37958408
Unigene0018825	chr4	37954366	37958408
Unigene0018826	chr4	37954366	37958408
Unigene0018827	chr4	37954366	37958408
Unigene0046582	chr4	37971663	37972532
Unigene0045373	chr4	38000686	38039144
Unigene0079556	chr4	38001784	38001970
Unigene0030752	chr4	38030567	38034423
Unigene0030748	chr4	38035582	38036827
Unigene0030749	chr4	38035582	38036836
Unigene0030751	chr4	38035582	38036832
Unigene0047826	chr4	38040289	38040892
Unigene0046582	chr4	38040638	38042245
Unigene0045373	chr4	38052980	38055712
Unigene0079556	chr4	38054078	38054264
Unigene0047826	chr4	38056857	38057460
Unigene0046582	chr4	38057206	38058813
Unigene0045373	chr4	38066114	38068846
Unigene0079556	chr4	38067212	38067398
Unigene0047826	chr4	38069991	38070594
Unigene0046582	chr4	38070340	38072825
Unigene0030417	chr4	38081453	38081895
Unigene0009238	chr4	38081570	38081990
Unigene0074366	chr4	38158882	38159280
Unigene0042346	chr4	38169106	38172200
Unigene0042550	chr4	38173408	38177737
Unigene0043254	chr4	38232481	38241459
Unigene0043254	chr4	38262442	38271452
Unigene0011355	chr4	38280628	38286313
Unigene0011356	chr4	38280628	38286313
Unigene0011357	chr4	38280628	38286313
Unigene0011358	chr4	38280628	38286313
Unigene0001745	chr4	38314140	38314688
Unigene0001746	chr4	38314140	38314688
Unigene0033487	chr4	38316587	38321788
Unigene0033488	chr4	38316587	38318043
Unigene0033484	chr4	38317523	38318043
Unigene0003588	chr4	38325518	38325778
Unigene0043722	chr4	38335976	38340788
Unigene0065115	chr4	38337904	38338823
Unigene0054376	chr4	38503253	38503956
Unigene0042457	chr4	38508652	38512194
Unigene0008700	chr4	38515288	38582883
Unigene0008701	chr4	38515288	38582883
Unigene0043513	chr4	38541004	38543862
Unigene0016072	chr4	38548423	38560794
Unigene0050172	chr4	38577364	38577752
Unigene0042073	chr4	38593921	38598003
Unigene0013613	chr4	38666150	38669108
Unigene0046089	chr4	38698466	38699614
Unigene0015469	chr4	38797627	38801672
Unigene0015470	chr4	38797627	38801672
Unigene0015471	chr4	38797627	38801672
Unigene0015472	chr4	38797627	38801672
Unigene0071010	chr4	38804061	38805972
Unigene0079339	chr4	38807030	38807627
Unigene0048286	chr4	38872358	38876937
Unigene0072439	chr4	38875383	38875584
Unigene0083621	chr4	38893065	38894918
Unigene0006662	chr4	38922459	38924013
Unigene0031465	chr4	38967983	38968714
Unigene0060401	chr4	38969211	38970173
Unigene0074373	chr4	38979979	38980221
Unigene0021979	chr4	38980691	38980997
Unigene0026202	chr4	39028742	39030312
Unigene0026203	chr4	39028742	39029402
Unigene0085896	chr4	39031914	39033291
Unigene0005507	chr4	39040949	39046859
Unigene0047960	chr4	39049065	39050705
Unigene0010709	chr4	39083705	39088037
Unigene0010711	chr4	39083705	39088037
Unigene0010710	chr4	39085105	39088037
Unigene0016337	chr4	39096239	39099494
Unigene0016338	chr4	39096239	39099434
Unigene0030403	chr4	39102831	39105611
Unigene0004832	chr4	39120719	39123471
Unigene0081106	chr4	39157575	39157741
Unigene0081106	chr4	39174884	39175036
Unigene0016337	chr4	39183076	39186274
Unigene0016338	chr4	39183076	39186274
Unigene0041361	chr4	39196358	39198331
Unigene0017110	chr4	39208566	39212721
Unigene0017109	chr4	39210092	39212721
Unigene0004832	chr4	39227477	39229815
Unigene0007756	chr4	39250237	39251961
Unigene0081106	chr4	39281228	39281380
Unigene0009634	chr4	39291141	39293624
Unigene0018923	chr4	39320341	39324285
Unigene0018924	chr4	39320341	39324285
Unigene0018925	chr4	39320341	39324285
Unigene0018926	chr4	39320341	39324285
Unigene0010538	chr4	39346780	39350641
Unigene0010539	chr4	39346780	39350641
Unigene0082915	chr4	39385371	39396263
Unigene0084418	chr4	39385371	39396263
Unigene0084417	chr4	39387433	39396263
Unigene0049119	chr4	39413518	39415969
Unigene0003635	chr4	39434664	39438434
Unigene0076070	chr4	39451189	39451426
Unigene0071369	chr4	39451444	39451763
Unigene0069534	chr4	39451744	39452216
Unigene0041418	chr4	39487293	39490050
Unigene0015919	chr4	39570383	39590524
Unigene0015920	chr4	39570383	39583244
Unigene0024750	chr4	39608411	39612519
Unigene0024757	chr4	39608411	39612519
Unigene0086703	chr4	39608411	39612519
Unigene0024746	chr4	39608663	39612519
Unigene0024748	chr4	39608663	39612519
Unigene0024754	chr4	39608663	39612519
Unigene0044991	chr4	39614749	39619119
Unigene0067623	chr4	39615914	39616231
Unigene0003648	chr4	39619103	39624185
Unigene0004496	chr4	39639287	39652094
Unigene0034089	chr4	39654083	39654376
Unigene0043611	chr4	39686601	39696448
Unigene0047088	chr4	39718690	39722576
Unigene0011234	chr4	39790378	39792096
Unigene0043464	chr4	39842875	39849697
Unigene0073384	chr4	39868842	39869168
Unigene0043174	chr4	39881339	39886562
Unigene0021731	chr4	39901492	39912180
Unigene0021732	chr4	39901492	39912180
Unigene0021733	chr4	39901492	39912180
Unigene0021734	chr4	39901492	39912180
Unigene0081908	chr4	39901492	39912180
Unigene0082914	chr4	39901492	39912180
Unigene0086977	chr4	39901492	39912180
Unigene0087030	chr4	39901492	39912180
Unigene0066985	chr4	39902947	39903794
Unigene0060101	chr4	39906163	39906438
Unigene0049952	chr4	39936380	39938561
Unigene0009474	chr4	39961661	39966051
Unigene0011524	chr4	39980352	39985607
Unigene0011525	chr4	39980635	39985607
Unigene0043278	chr4	39997049	40004288
Unigene0072981	chr4	40002120	40002312
Unigene0008768	chr4	40005234	40010010
Unigene0056041	chr4	40005385	40006395
Unigene0013292	chr4	40023049	40027401
Unigene0086737	chr4	40023049	40027593
Unigene0011629	chr4	40090413	40092709
Unigene0012700	chr4	40099838	40102760
Unigene0008228	chr4	40106701	40109382
Unigene0004475	chr4	40141367	40145954
Unigene0005829	chr4	40177823	40186921
Unigene0045383	chr4	40241264	40249060
Unigene0081674	chr4	40253825	40264333
Unigene0083402	chr4	40253825	40264333
Unigene0015351	chr4	40253955	40264333
Unigene0015352	chr4	40253955	40264333
Unigene0077604	chr4	40280714	40283586
Unigene0048526	chr4	40383825	40384959
Unigene0021658	chr4	40400532	40412177
Unigene0083947	chr4	40400532	40412177
Unigene0018181	chr4	40425303	40426813
Unigene0003914	chr4	40440647	40446807
Unigene0055563	chr4	40480011	40480542
Unigene0061909	chr4	40480580	40483170
Unigene0055563	chr4	40552955	40553525
Unigene0061909	chr4	40553524	40556114
Unigene0045939	chr4	40563552	40564132
Unigene0006168	chr4	40580772	40581872
Unigene0006169	chr4	40580772	40581872
Unigene0006168	chr4	40592806	40593909
Unigene0006169	chr4	40592806	40593909
Unigene0021333	chr4	40602148	40602776
Unigene0003211	chr4	40816225	40817633
Unigene0027248	chr4	40820887	40823379
Unigene0027253	chr4	40820887	40823344
Unigene0086805	chr4	40827996	40833516
Unigene0033649	chr4	40829913	40830261
Unigene0022060	chr4	40934783	40939109
Unigene0022062	chr4	40934783	40939109
Unigene0022067	chr4	40934783	40939109
Unigene0042221	chr4	40941682	40946053
Unigene0054152	chr4	40959460	40960001
Unigene0058110	chr4	40960050	40960256
Unigene0055977	chr4	40960246	40961152
Unigene0014445	chr4	40971471	40986429
Unigene0014446	chr4	40971471	40986429
Unigene0022637	chr4	40998227	41005064
Unigene0022638	chr4	40998227	41005064
Unigene0081458	chr4	40998227	41005064
Unigene0085048	chr4	40998227	41005064
Unigene0056249	chr4	41005044	41005668
Unigene0016203	chr4	41009588	41012789
Unigene0032195	chr4	41014663	41018042
Unigene0032191	chr4	41016179	41017947
Unigene0032193	chr4	41016179	41018042
Unigene0030755	chr4	41070028	41070624
Unigene0030758	chr4	41070028	41070624
Unigene0030755	chr4	41086138	41086657
Unigene0030756	chr4	41086638	41087007
Unigene0023650	chr4	41128883	41129147
Unigene0023650	chr4	41135834	41136098
Unigene0023650	chr4	41142564	41142828
Unigene0007592	chr4	41161422	41168084
Unigene0007593	chr4	41161422	41168084
Unigene0006670	chr4	41164246	41164845
Unigene0043000	chr4	41204557	41210943
Unigene0000387	chr4	41205209	41205482
Unigene0045221	chr4	41251133	41254544
Unigene0047587	chr4	41266009	41287064
Unigene0012584	chr4	41288771	41296773
Unigene0012585	chr4	41288771	41296773
Unigene0053046	chr4	41306065	41307902
Unigene0042856	chr4	41392879	41395306
Unigene0031906	chr4	41399528	41405330
Unigene0043422	chr4	41518178	41519956
Unigene0083635	chr4	41524543	41531065
Unigene0084093	chr4	41524543	41528042
Unigene0086989	chr4	41524543	41531065
Unigene0046943	chr4	41557478	41563084
Unigene0025131	chr4	41573124	41581556
Unigene0052892	chr4	41595809	41598217
Unigene0016322	chr4	41614680	41619105
Unigene0016323	chr4	41614680	41619105
Unigene0044824	chr4	41637256	41638695
Unigene0045402	chr4	41638676	41640259
Unigene0044670	chr4	41640368	41642467
Unigene0004767	chr4	41724414	41726312
Unigene0004766	chr4	41724989	41726312
Unigene0047292	chr4	41727423	41728405
Unigene0008260	chr4	41740203	41740569
Unigene0035246	chr4	41753358	41756340
Unigene0035238	chr4	41753489	41756340
Unigene0035247	chr4	41753489	41756152
Unigene0035251	chr4	41753489	41756152
Unigene0035237	chr4	41755494	41756152
Unigene0035241	chr4	41755494	41758647
Unigene0035245	chr4	41755494	41756340
Unigene0035253	chr4	41755494	41756152
Unigene0084403	chr4	41755494	41758647
Unigene0035240	chr4	41756435	41758425
Unigene0017898	chr4	41790211	41793183
Unigene0047438	chr4	41807574	41810959
Unigene0013478	chr4	41810937	41814078
Unigene0047220	chr4	41900742	41909176
Unigene0042959	chr4	41929689	41934896
Unigene0015872	chr4	41957407	41958908
Unigene0015873	chr4	41957474	41958908
Unigene0039208	chr4	41962677	41963593
Unigene0036785	chr4	41964335	41964623
Unigene0015872	chr4	42045730	42047231
Unigene0015873	chr4	42046624	42047231
Unigene0039208	chr4	42051000	42051916
Unigene0036785	chr4	42052658	42052946
Unigene0049100	chr4	42073244	42073541
Unigene0020136	chr4	42073859	42080192
Unigene0017571	chr4	42075247	42077225
Unigene0017573	chr4	42075247	42077225
Unigene0017572	chr4	42075629	42077225
Unigene0044898	chr4	42089502	42103688
Unigene0043229	chr4	42130903	42133892
Unigene0086694	chr4	42141793	42150624
Unigene0009533	chr4	42165835	42166127
Unigene0084720	chr4	42165835	42167076
Unigene0036852	chr4	42188923	42189331
Unigene0077648	chr4	42199994	42200331
Unigene0081941	chr4	42220223	42226681
Unigene0043967	chr4	42250923	42258895
Unigene0041556	chr4	42267880	42272638
Unigene0036852	chr4	42284334	42284742
Unigene0077648	chr4	42295404	42295741
Unigene0081941	chr4	42315634	42322094
Unigene0043967	chr4	42346327	42354301
Unigene0041556	chr4	42363289	42368144
Unigene0029672	chr4	42422079	42425942
Unigene0087110	chr4	42447852	42456564
Unigene0008606	chr4	42463290	42469640
Unigene0008605	chr4	42465555	42469640
Unigene0069831	chr4	42542374	42543607
Unigene0008966	chr4	42568382	42572748
Unigene0006719	chr4	42794534	42893304
Unigene0006719	chr4	42796754	42808324
Unigene0017429	chr4	42856650	42859191
Unigene0073457	chr4	42918518	42918989
Unigene0004321	chr4	42947872	42948146
Unigene0039332	chr4	42948215	42949018
Unigene0018029	chr4	42969027	42977469
Unigene0002892	chr4	42983163	42986137
Unigene0002893	chr4	42983637	42986137
Unigene0044903	chr4	43003349	43007339
Unigene0043752	chr4	43008140	43013878
Unigene0038071	chr4	43021531	43026444
Unigene0072927	chr4	43039566	43040142
Unigene0085957	chr4	43040133	43043922
Unigene0005097	chr4	43045594	43046953
Unigene0005098	chr4	43045594	43046953
Unigene0031755	chr4	43048422	43057332
Unigene0031756	chr4	43048422	43057332
Unigene0031763	chr4	43048422	43057332
Unigene0081867	chr4	43099167	43118746
Unigene0004723	chr4	43169450	43178746
Unigene0042630	chr4	43207664	43211209
Unigene0052136	chr4	43219380	43219686
Unigene0007660	chr4	43236483	43239601
Unigene0007661	chr4	43236483	43239601
Unigene0043822	chr4	43342116	43346755
Unigene0004417	chr4	43371147	43391767
Unigene0005524	chr4	43407690	43416309
Unigene0072258	chr4	43457295	43457588
Unigene0045720	chr4	43459691	43462727
Unigene0004584	chr4	43464192	43475907
Unigene0036916	chr4	43485166	43495856
Unigene0036921	chr4	43485166	43495856
Unigene0036928	chr4	43485166	43488185
Unigene0036937	chr4	43485166	43488185
Unigene0082187	chr4	43485166	43488185
Unigene0082189	chr4	43485166	43488185
Unigene0082192	chr4	43485166	43488185
Unigene0082195	chr4	43485166	43488185
Unigene0082197	chr4	43485166	43488185
Unigene0082212	chr4	43485166	43488185
Unigene0082216	chr4	43485166	43488185
Unigene0082218	chr4	43485166	43488185
Unigene0036911	chr4	43487698	43495856
Unigene0036931	chr4	43487698	43495856
Unigene0036939	chr4	43487698	43495856
Unigene0083100	chr4	43487698	43495856
Unigene0083101	chr4	43487698	43495856
Unigene0083102	chr4	43487698	43495856
Unigene0083103	chr4	43487698	43495856
Unigene0085749	chr4	43487698	43495856
Unigene0085750	chr4	43487698	43495856
Unigene0085751	chr4	43487698	43495856
Unigene0085752	chr4	43487698	43495856
Unigene0004212	chr4	43518679	43527996
Unigene0048043	chr4	43536777	43543311
Unigene0045044	chr4	43554631	43555834
Unigene0043337	chr4	43557260	43558369
Unigene0029385	chr4	43563033	43565810
Unigene0042273	chr4	43674886	43681375
Unigene0003679	chr4	43700371	43704988
Unigene0048317	chr4	43704017	43704332
Unigene0045494	chr4	43704858	43706888
Unigene0005162	chr4	43721869	43726475
Unigene0045975	chr4	43742403	43746911
Unigene0040152	chr4	43780908	43786024
Unigene0040155	chr4	43780908	43786024
Unigene0025189	chr4	43792865	43798866
Unigene0025190	chr4	43792865	43798866
Unigene0025191	chr4	43792865	43798866
Unigene0025192	chr4	43792865	43798866
Unigene0045975	chr4	43820779	43825344
Unigene0010927	chr4	43850205	43852762
Unigene0010928	chr4	43850205	43852762
Unigene0010929	chr4	43850205	43852762
Unigene0010930	chr4	43850205	43852762
Unigene0031621	chr4	43948119	43948601
Unigene0031618	chr4	43951985	43952278
Unigene0031616	chr4	43952180	43953116
Unigene0039275	chr4	44015851	44019254
Unigene0039280	chr4	44015851	44019254
Unigene0039284	chr4	44015851	44019254
Unigene0039287	chr4	44015851	44019254
Unigene0039288	chr4	44015851	44019254
Unigene0039290	chr4	44015851	44019254
Unigene0039283	chr4	44022627	44023074
Unigene0039282	chr4	44022719	44023074
Unigene0031618	chr4	44055058	44055351
Unigene0024990	chr4	44173365	44185067
Unigene0024991	chr4	44173365	44185067
Unigene0024992	chr4	44173365	44185067
Unigene0024993	chr4	44173365	44185067
Unigene0024994	chr4	44173365	44185067
Unigene0024995	chr4	44173365	44185067
Unigene0024996	chr4	44173365	44185067
Unigene0024997	chr4	44173365	44185067
Unigene0045035	chr4	44186366	44187334
Unigene0015623	chr4	44223647	44231772
Unigene0015624	chr4	44223647	44231772
Unigene0015625	chr4	44223647	44231772
Unigene0015626	chr4	44223647	44231772
Unigene0007078	chr4	44247420	44252271
Unigene0041452	chr4	44252908	44257200
Unigene0048667	chr4	44303413	44303871
Unigene0002059	chr4	44303855	44307327
Unigene0084422	chr4	44323573	44329089
Unigene0084421	chr4	44323677	44329089
Unigene0045503	chr4	44330001	44332006
Unigene0053086	chr4	44366300	44370880
Unigene0007128	chr4	44430520	44434573
Unigene0052656	chr4	44440245	44442150
Unigene0051047	chr4	44442204	44445102
Unigene0006905	chr4	44445287	44447050
Unigene0006906	chr4	44445287	44447050
Unigene0050177	chr4	44447143	44448171
Unigene0049844	chr4	44448371	44448978
Unigene0003982	chr4	44472499	44477305
Unigene0006359	chr4	44530241	44536018
Unigene0000529	chr4	44590989	44591925
Unigene0045491	chr4	44593374	44597018
Unigene0004353	chr4	44616185	44622110
Unigene0022458	chr4	44635073	44635928
Unigene0023024	chr4	44652103	44657397
Unigene0083169	chr4	44652103	44657397
Unigene0083170	chr4	44652103	44657397
Unigene0023021	chr4	44653623	44657397
Unigene0023023	chr4	44653623	44657397
Unigene0023026	chr4	44653623	44657397
Unigene0041830	chr4	44676629	44682253
Unigene0043405	chr4	44714067	44718170
Unigene0039518	chr4	44727797	44728004
Unigene0044702	chr4	44760310	44762634
Unigene0035904	chr4	44772453	44783182
Unigene0035905	chr4	44772453	44782453
Unigene0035907	chr4	44772453	44782453
Unigene0035909	chr4	44772453	44782848
Unigene0035917	chr4	44772453	44782453
Unigene0035919	chr4	44772453	44782848
Unigene0035921	chr4	44772453	44782848
Unigene0035927	chr4	44772453	44783182
Unigene0035931	chr4	44772453	44782848
Unigene0035933	chr4	44772453	44782453
Unigene0083014	chr4	44816646	44821621
Unigene0031767	chr4	44818779	44818991
Unigene0079741	chr4	44842735	44842952
Unigene0028336	chr4	44967794	44969309
Unigene0043339	chr4	44972662	44977392
Unigene0045005	chr4	44983555	44995130
Unigene0044709	chr4	45006689	45013506
Unigene0078498	chr4	45009187	45009398
Unigene0000581	chr4	45011029	45011325
Unigene0029011	chr4	45083039	45083407
Unigene0041864	chr4	45092436	45095934
Unigene0042958	chr4	45108653	45114475
Unigene0052832	chr4	45141648	45143417
Unigene0043626	chr4	45203742	45214455
Unigene0049130	chr4	45262912	45264043
Unigene0024502	chr4	45350367	45355371
Unigene0060717	chr4	45425390	45426972
Unigene0065578	chr4	45426978	45428202
Unigene0014522	chr4	45632598	45636270
Unigene0014523	chr4	45632598	45638358
Unigene0042694	chr4	45657953	45661467
Unigene0014523	chr4	45664146	45669906
Unigene0014522	chr4	45666234	45669906
Unigene0045274	chr4	45679010	45680805
Unigene0046570	chr4	45680792	45681009
Unigene0008093	chr4	45680991	45683952
Unigene0084701	chr4	45720899	45722172
Unigene0017750	chr4	45722313	45722454
Unigene0004263	chr4	45790323	45793030
Unigene0005956	chr4	45821881	45824677
Unigene0005957	chr4	45823135	45824677
Unigene0015316	chr4	45824635	45824928
Unigene0005544	chr4	45824957	45829894
Unigene0008310	chr4	45830884	45833749
Unigene0008311	chr4	45830884	45833749
Unigene0005898	chr4	45835107	45840094
Unigene0009100	chr4	45843253	45847554
Unigene0053431	chr4	45849696	45850707
Unigene0041648	chr4	45858583	45864832
Unigene0020293	chr4	45868524	45871768
Unigene0020294	chr4	45868524	45871856
Unigene0020295	chr4	45868524	45871856
Unigene0020296	chr4	45868524	45871856
Unigene0020297	chr4	45868524	45871768
Unigene0020298	chr4	45868524	45871768
Unigene0020299	chr4	45868524	45871856
Unigene0020300	chr4	45868524	45871768
Unigene0005303	chr4	45944285	45948768
Unigene0024760	chr4	45968396	45974070
Unigene0024761	chr4	45968396	45974070
Unigene0012855	chr4	45975510	45979002
Unigene0012856	chr4	45975510	45976870
Unigene0041669	chr4	45981016	45985999
Unigene0015405	chr4	45998886	46003114
Unigene0015406	chr4	45998886	45999828
Unigene0015407	chr4	45998886	46003114
Unigene0003547	chr4	46067846	46069611
Unigene0014674	chr4	46070950	46076149
Unigene0086992	chr4	46093125	46100984
Unigene0031310	chr4	46178820	46183299
Unigene0083659	chr4	46197319	46199237
Unigene0083659	chr4	46203932	46205887
Unigene0083659	chr4	46220659	46222614
Unigene0071438	chr4	46266189	46266702
Unigene0001930	chr4	46266792	46267248
Unigene0042808	chr4	46270883	46272275
Unigene0003887	chr4	46315178	46317344
Unigene0032698	chr4	46379479	46380905
Unigene0032711	chr4	46379479	46380905
Unigene0042858	chr4	46388430	46395080
Unigene0009387	chr4	46418380	46422875
Unigene0009388	chr4	46420609	46422875
Unigene0003117	chr4	46423610	46428601
Unigene0003118	chr4	46423610	46428601
Unigene0052602	chr4	46439291	46440656
Unigene0059880	chr4	46443428	46443564
Unigene0058965	chr4	46452859	46456958
Unigene0046320	chr4	46477082	46480288
Unigene0010964	chr4	46482522	46492546
Unigene0069761	chr4	46485569	46485751
Unigene0049832	chr4	46538490	46539254
Unigene0011268	chr4	46621974	46626577
Unigene0016679	chr4	46648689	46655302
Unigene0085623	chr4	46648689	46655302
Unigene0073401	chr4	46699547	46700086
Unigene0018932	chr4	46729152	46732317
Unigene0081640	chr4	46729152	46732317
Unigene0041613	chr4	46748175	46752112
Unigene0005666	chr4	46767950	46770888
Unigene0005667	chr4	46767950	46770888
Unigene0019762	chr4	46803847	46811502
Unigene0019764	chr4	46808508	46811502
Unigene0055324	chr4	46825384	46825860
Unigene0010864	chr4	46841254	46851772
Unigene0010865	chr4	46841254	46851772
Unigene0010866	chr4	46841254	46851772
Unigene0010867	chr4	46841254	46851772
Unigene0042664	chr4	46876421	46882497
Unigene0084432	chr4	46890915	46895221
Unigene0084433	chr4	46890915	46895221
Unigene0043751	chr4	46941197	46943141
Unigene0045994	chr4	46945366	46947284
Unigene0018655	chr4	46999521	47001769
Unigene0005574	chr4	47016002	47020493
Unigene0005575	chr4	47016002	47020493
Unigene0046349	chr4	47020473	47021281
Unigene0042284	chr4	47022532	47024781
Unigene0006584	chr4	47026994	47030091
Unigene0006585	chr4	47026994	47029960
Unigene0038309	chr4	47070526	47070669
Unigene0045023	chr4	47097883	47098132
Unigene0025351	chr4	47130492	47134905
Unigene0054256	chr4	47273810	47274535
Unigene0068489	chr4	47313938	47314083
Unigene0009746	chr4	47371699	47373665

## Sheet: 5
Unigene0021806	chr5	5477	13939
Unigene0021807	chr5	5477	13939
Unigene0021808	chr5	5477	13939
Unigene0021809	chr5	5477	13939
Unigene0021810	chr5	5477	13939
Unigene0021811	chr5	5477	13939
Unigene0021812	chr5	5477	13939
Unigene0021813	chr5	5477	13939
Unigene0059557	chr5	8998	9247
Unigene0036111	chr5	15238	18067
Unigene0036114	chr5	15238	18410
Unigene0042459	chr5	44432	46097
Unigene0045559	chr5	55776	58957
Unigene0031273	chr5	68581	71205
Unigene0051878	chr5	99282	99479
Unigene0010529	chr5	146077	150992
Unigene0011309	chr5	152828	185872
Unigene0012692	chr5	209203	215448
Unigene0012693	chr5	209203	215448
Unigene0012694	chr5	209203	215448
Unigene0077913	chr5	247718	247931
Unigene0058944	chr5	249245	249772
Unigene0016149	chr5	331630	332782
Unigene0016150	chr5	331630	332782
Unigene0031719	chr5	407864	415873
Unigene0002489	chr5	416160	417241
Unigene0031693	chr5	438758	447645
Unigene0031694	chr5	438758	447310
Unigene0031695	chr5	438758	447645
Unigene0022710	chr5	468761	480052
Unigene0022711	chr5	468761	480052
Unigene0022712	chr5	468761	480052
Unigene0022715	chr5	468761	480052
Unigene0022713	chr5	475402	480052
Unigene0022714	chr5	475402	480052
Unigene0015806	chr5	533779	538265
Unigene0065263	chr5	537726	538020
Unigene0083629	chr5	546858	549848
Unigene0019114	chr5	589412	592402
Unigene0019115	chr5	589412	592402
Unigene0019116	chr5	589412	590656
Unigene0019118	chr5	589412	590656
Unigene0019117	chr5	591700	592402
Unigene0044687	chr5	620150	620311
Unigene0043849	chr5	624419	628430
Unigene0077353	chr5	666490	666682
Unigene0001782	chr5	674840	677683
Unigene0040210	chr5	781879	783194
Unigene0085743	chr5	784895	793471
Unigene0085744	chr5	784895	792665
Unigene0085747	chr5	784895	792665
Unigene0085748	chr5	784895	793471
Unigene0085745	chr5	785983	792665
Unigene0085746	chr5	785983	793471
Unigene0033367	chr5	796704	796970
Unigene0033367	chr5	834433	834681
Unigene0048285	chr5	846555	847564
Unigene0008813	chr5	864421	870210
Unigene0006283	chr5	869769	870177
Unigene0003410	chr5	888022	892520
Unigene0003652	chr5	909547	910663
Unigene0044118	chr5	936956	941934
Unigene0004713	chr5	950040	950786
Unigene0024157	chr5	1016638	1019384
Unigene0033652	chr5	1020814	1024348
Unigene0033651	chr5	1027682	1031620
Unigene0033653	chr5	1027682	1057924
Unigene0042637	chr5	1087090	1099755
Unigene0083748	chr5	1102571	1105661
Unigene0010417	chr5	1149989	1153104
Unigene0056421	chr5	1201252	1201794
Unigene0048578	chr5	1235568	1236215
Unigene0040199	chr5	1240531	1250486
Unigene0040199	chr5	1244647	1250565
Unigene0046506	chr5	1280342	1282680
Unigene0024810	chr5	1282167	1293425
Unigene0045643	chr5	1291481	1292642
Unigene0044839	chr5	1292620	1293794
Unigene0007221	chr5	1307014	1308094
Unigene0020830	chr5	1321795	1334854
Unigene0020831	chr5	1321795	1334854
Unigene0020832	chr5	1321795	1327217
Unigene0020833	chr5	1321795	1334854
Unigene0020834	chr5	1321795	1334854
Unigene0044611	chr5	1393855	1396484
Unigene0018046	chr5	1415878	1418246
Unigene0018047	chr5	1415878	1418246
Unigene0071830	chr5	1418330	1418631
Unigene0078509	chr5	1418853	1419062
Unigene0009904	chr5	1475646	1478206
Unigene0009907	chr5	1475646	1478206
Unigene0012210	chr5	1482120	1484378
Unigene0012211	chr5	1482120	1484378
Unigene0013718	chr5	1493041	1498787
Unigene0021023	chr5	1527801	1535593
Unigene0086607	chr5	1527801	1535593
Unigene0045944	chr5	1544487	1552487
Unigene0045433	chr5	1554067	1556128
Unigene0043907	chr5	1644224	1657693
Unigene0027396	chr5	1661252	1668115
Unigene0027397	chr5	1661252	1668115
Unigene0027398	chr5	1661252	1668115
Unigene0027399	chr5	1661252	1668115
Unigene0083293	chr5	1661458	1668115
Unigene0083918	chr5	1661458	1668115
Unigene0083995	chr5	1661458	1668115
Unigene0085919	chr5	1661458	1668115
Unigene0041784	chr5	1695270	1706885
Unigene0086973	chr5	1719620	1721327
Unigene0046220	chr5	1801570	1806938
Unigene0043323	chr5	1832386	1845608
Unigene0019914	chr5	1848061	1850473
Unigene0008323	chr5	1853853	1856446
Unigene0008325	chr5	1853853	1856446
Unigene0015755	chr5	1858575	1866735
Unigene0015757	chr5	1858575	1866735
Unigene0000471	chr5	1859400	1859685
Unigene0046208	chr5	1890606	1896638
Unigene0041760	chr5	1923801	1928624
Unigene0011382	chr5	1948215	1949546
Unigene0043519	chr5	1962050	1970395
Unigene0043519	chr5	1973439	1983399
Unigene0019974	chr5	2040619	2043894
Unigene0019975	chr5	2040619	2043894
Unigene0042614	chr5	2050558	2056724
Unigene0065770	chr5	2110266	2110765
Unigene0063375	chr5	2144628	2144820
Unigene0011496	chr5	2164899	2172838
Unigene0081705	chr5	2164899	2172838
Unigene0041715	chr5	2181089	2185421
Unigene0054370	chr5	2183511	2183827
Unigene0016623	chr5	2210906	2225273
Unigene0016622	chr5	2210997	2225273
Unigene0082431	chr5	2230508	2235646
Unigene0087111	chr5	2230508	2235646
Unigene0058298	chr5	2233051	2233314
Unigene0021452	chr5	2248583	2252074
Unigene0011782	chr5	2252239	2254897
Unigene0065655	chr5	2306669	2306884
Unigene0000975	chr5	2331981	2334519
Unigene0000976	chr5	2333590	2334519
Unigene0049575	chr5	2335390	2337809
Unigene0067002	chr5	2353532	2353844
Unigene0001046	chr5	2374933	2376112
Unigene0001047	chr5	2374933	2376112
Unigene0020109	chr5	2407162	2410920
Unigene0020108	chr5	2407440	2410920
Unigene0020107	chr5	2407610	2410920
Unigene0041422	chr5	2412218	2413100
Unigene0041192	chr5	2413101	2413749
Unigene0061125	chr5	2416869	2418350
Unigene0074765	chr5	2418433	2418607
Unigene0004171	chr5	2424992	2430261
Unigene0020770	chr5	2463506	2466258
Unigene0045368	chr5	2474027	2496625
Unigene0067236	chr5	2527695	2528061
Unigene0076580	chr5	2528950	2529409
Unigene0079390	chr5	2529396	2529678
Unigene0016686	chr5	2537029	2546630
Unigene0000337	chr5	2552531	2554175
Unigene0003923	chr5	2568771	2571647
Unigene0060528	chr5	2576386	2576939
Unigene0074103	chr5	2576979	2577380
Unigene0051042	chr5	2585690	2585897
Unigene0011681	chr5	2627097	2628470
Unigene0011682	chr5	2627132	2628470
Unigene0015892	chr5	2634247	2638034
Unigene0063926	chr5	2644210	2644428
Unigene0070435	chr5	2657616	2659023
Unigene0070252	chr5	2659326	2659713
Unigene0068416	chr5	2694978	2697300
Unigene0077017	chr5	2697585	2698301
Unigene0073060	chr5	2698416	2700617
Unigene0077145	chr5	2703282	2703462
Unigene0078435	chr5	2703873	2704541
Unigene0081266	chr5	2704706	2705331
Unigene0048060	chr5	2729698	2732828
Unigene0076112	chr5	2746328	2746555
Unigene0011042	chr5	2801671	2805705
Unigene0032453	chr5	2819766	2831267
Unigene0032456	chr5	2819766	2827439
Unigene0041504	chr5	2861238	2865526
Unigene0075554	chr5	2867601	2868190
Unigene0074530	chr5	2869112	2876053
Unigene0075564	chr5	2869608	2871617
Unigene0075554	chr5	2874097	2874686
Unigene0005648	chr5	2881869	2886084
Unigene0005647	chr5	2885228	2886084
Unigene0000067	chr5	2919062	2920876
Unigene0000068	chr5	2919062	2919939
Unigene0079584	chr5	2941445	2941666
Unigene0086787	chr5	2943339	2945613
Unigene0080460	chr5	2964157	2964331
Unigene0073865	chr5	3021526	3021785
Unigene0086342	chr5	3037905	3040209
Unigene0074790	chr5	3042748	3043087
Unigene0044204	chr5	3071336	3079842
Unigene0071406	chr5	3088391	3088676
Unigene0074501	chr5	3089064	3089370
Unigene0031610	chr5	3122577	3123319
Unigene0053469	chr5	3123348	3123623
Unigene0084076	chr5	3193908	3197361
Unigene0082542	chr5	3198140	3201082
Unigene0020497	chr5	3201371	3201643
Unigene0048182	chr5	3203012	3205357
Unigene0028768	chr5	3225183	3228234
Unigene0028772	chr5	3225183	3228234
Unigene0037424	chr5	3260774	3261911
Unigene0041188	chr5	3303132	3304790
Unigene0009984	chr5	3324692	3326706
Unigene0009985	chr5	3324692	3326706
Unigene0024679	chr5	3331803	3332715
Unigene0046495	chr5	3340158	3342219
Unigene0044511	chr5	3475443	3476850
Unigene0006283	chr5	3492771	3493180
Unigene0008396	chr5	3566108	3566351
Unigene0002896	chr5	3566526	3567940
Unigene0043928	chr5	3581913	3589360
Unigene0027880	chr5	3636710	3641763
Unigene0085872	chr5	3638023	3641763
Unigene0047392	chr5	3641218	3641815
Unigene0043568	chr5	3642501	3646927
Unigene0081923	chr5	3660113	3662273
Unigene0018423	chr5	3706749	3714404
Unigene0030731	chr5	3726662	3729429
Unigene0085703	chr5	3726662	3732852
Unigene0085704	chr5	3726662	3732852
Unigene0085705	chr5	3726662	3734157
Unigene0085706	chr5	3726662	3733936
Unigene0085707	chr5	3726662	3733936
Unigene0085708	chr5	3726662	3734157
Unigene0030732	chr5	3729766	3732852
Unigene0030733	chr5	3729766	3732852
Unigene0030735	chr5	3729766	3733936
Unigene0030736	chr5	3729766	3734157
Unigene0030738	chr5	3729766	3734157
Unigene0085702	chr5	3729766	3733936
Unigene0030737	chr5	3732157	3733936
Unigene0030739	chr5	3732157	3734157
Unigene0030740	chr5	3732157	3732852
Unigene0030734	chr5	3734030	3734157
Unigene0027854	chr5	3747890	3751297
Unigene0039206	chr5	3756360	3758543
Unigene0006625	chr5	3762676	3770591
Unigene0084356	chr5	3834473	3837685
Unigene0011577	chr5	3878644	3886890
Unigene0011576	chr5	3878834	3886890
Unigene0044372	chr5	3924968	3928307
Unigene0064757	chr5	4006301	4007981
Unigene0027332	chr5	4021562	4027803
Unigene0081623	chr5	4021562	4027803
Unigene0045635	chr5	4080293	4085870
Unigene0005971	chr5	4087198	4088932
Unigene0005972	chr5	4087198	4088932
Unigene0016971	chr5	4088533	4091116
Unigene0016972	chr5	4088533	4091116
Unigene0082964	chr5	4102567	4105061
Unigene0038907	chr5	4187706	4242251
Unigene0038911	chr5	4187706	4242251
Unigene0038914	chr5	4187706	4196712
Unigene0038938	chr5	4187706	4196712
Unigene0038905	chr5	4195775	4242251
Unigene0038906	chr5	4195775	4242251
Unigene0038908	chr5	4195775	4242251
Unigene0038910	chr5	4195775	4242251
Unigene0038917	chr5	4195775	4242251
Unigene0038918	chr5	4195775	4242251
Unigene0038919	chr5	4195775	4242251
Unigene0038922	chr5	4195775	4242251
Unigene0038924	chr5	4195775	4242251
Unigene0038926	chr5	4195775	4242251
Unigene0038927	chr5	4195775	4242251
Unigene0038928	chr5	4195775	4242251
Unigene0038930	chr5	4195775	4242251
Unigene0038933	chr5	4195775	4242251
Unigene0038934	chr5	4195775	4242251
Unigene0038936	chr5	4195775	4242251
Unigene0085031	chr5	4195775	4242251
Unigene0086461	chr5	4195775	4242251
Unigene0010915	chr5	4244624	4254118
Unigene0021681	chr5	4256865	4270097
Unigene0021682	chr5	4256865	4270097
Unigene0042998	chr5	4278305	4291471
Unigene0014165	chr5	4338174	4342486
Unigene0014166	chr5	4338225	4342486
Unigene0014164	chr5	4338234	4342486
Unigene0044346	chr5	4352906	4357861
Unigene0010410	chr5	4368659	4372107
Unigene0010411	chr5	4368659	4372107
Unigene0010412	chr5	4368659	4372107
Unigene0010413	chr5	4368659	4372107
Unigene0076399	chr5	4394406	4394674
Unigene0055899	chr5	4419965	4421347
Unigene0012163	chr5	4421389	4423621
Unigene0026504	chr5	4445350	4450779
Unigene0026506	chr5	4445350	4448806
Unigene0026505	chr5	4449243	4450779
Unigene0039992	chr5	4501162	4505134
Unigene0055938	chr5	4523097	4524177
Unigene0062691	chr5	4524158	4524972
Unigene0060053	chr5	4525354	4526345
Unigene0042535	chr5	4534181	4542700
Unigene0073395	chr5	4574000	4574211
Unigene0010098	chr5	4596682	4600223
Unigene0010099	chr5	4596682	4600223
Unigene0010100	chr5	4596682	4600223
Unigene0010101	chr5	4596682	4600223
Unigene0043997	chr5	4730806	4735142
Unigene0042311	chr5	4833156	4842410
Unigene0049317	chr5	4856040	4857844
Unigene0075799	chr5	4920215	4920411
Unigene0020384	chr5	4921005	4921420
Unigene0004532	chr5	4979626	4981753
Unigene0028295	chr5	5011128	5014437
Unigene0028297	chr5	5011128	5014631
Unigene0028301	chr5	5011128	5014437
Unigene0028303	chr5	5011128	5014631
Unigene0005095	chr5	5026957	5031637
Unigene0011211	chr5	5047200	5052621
Unigene0042451	chr5	5059996	5065390
Unigene0045999	chr5	5114437	5120923
Unigene0027564	chr5	5130307	5131706
Unigene0022457	chr5	5159660	5165008
Unigene0022456	chr5	5161504	5162429
Unigene0007171	chr5	5229011	5231447
Unigene0046546	chr5	5232705	5233618
Unigene0021539	chr5	5234173	5236052
Unigene0047775	chr5	5257561	5258162
Unigene0028186	chr5	5272438	5277799
Unigene0028187	chr5	5272438	5277799
Unigene0084394	chr5	5275236	5277799
Unigene0085835	chr5	5275236	5277799
Unigene0084393	chr5	5275295	5277799
Unigene0085836	chr5	5275295	5277799
Unigene0046020	chr5	5305921	5310084
Unigene0044074	chr5	5311033	5312029
Unigene0008241	chr5	5434724	5440656
Unigene0008242	chr5	5434724	5440656
Unigene0001568	chr5	5437789	5437975
Unigene0024384	chr5	5456503	5464414
Unigene0024385	chr5	5456503	5464414
Unigene0024386	chr5	5456503	5464414
Unigene0024387	chr5	5456503	5464414
Unigene0024388	chr5	5456503	5464414
Unigene0024389	chr5	5456503	5457799
Unigene0024390	chr5	5456503	5458090
Unigene0024391	chr5	5456503	5464414
Unigene0024392	chr5	5456503	5464414
Unigene0024393	chr5	5456503	5464414
Unigene0081177	chr5	5463061	5463271
Unigene0044471	chr5	5493883	5506428
Unigene0028956	chr5	5539061	5541542
Unigene0044473	chr5	5544663	5548891
Unigene0022954	chr5	5593577	5616887
Unigene0000280	chr5	5681924	5683252
Unigene0005959	chr5	5683778	5688077
Unigene0005960	chr5	5683778	5688077
Unigene0007926	chr5	5697074	5697957
Unigene0057932	chr5	5697935	5698681
Unigene0023859	chr5	5707274	5707921
Unigene0023860	chr5	5707277	5707921
Unigene0041644	chr5	5731509	5732621
Unigene0007186	chr5	5807437	5809180
Unigene0007187	chr5	5807437	5809180
Unigene0002718	chr5	5840199	5849856
Unigene0083567	chr5	5851117	5852185
Unigene0015784	chr5	5851516	5851762
Unigene0052668	chr5	5925708	5927484
Unigene0056828	chr5	5928202	5929435
Unigene0053527	chr5	5929849	5930289
Unigene0052237	chr5	5930494	5931799
Unigene0009026	chr5	5934289	5947021
Unigene0009027	chr5	5934289	5947021
Unigene0019638	chr5	6036033	6041037
Unigene0019639	chr5	6036033	6041037
Unigene0019640	chr5	6036033	6041037
Unigene0048266	chr5	6057036	6064069
Unigene0020524	chr5	6098870	6105426
Unigene0020525	chr5	6098870	6105426
Unigene0020526	chr5	6098870	6105426
Unigene0020527	chr5	6098870	6105426
Unigene0044059	chr5	6167189	6168406
Unigene0004941	chr5	6204549	6211429
Unigene0043507	chr5	6214624	6237303
Unigene0006253	chr5	6266469	6267655
Unigene0006254	chr5	6266469	6267655
Unigene0012222	chr5	6307043	6311447
Unigene0012223	chr5	6307043	6311447
Unigene0012224	chr5	6307043	6311447
Unigene0012225	chr5	6307043	6311447
Unigene0055663	chr5	6311530	6312434
Unigene0052626	chr5	6313273	6313445
Unigene0053333	chr5	6315051	6315456
Unigene0007079	chr5	6315435	6315819
Unigene0007080	chr5	6315435	6317629
Unigene0053281	chr5	6317612	6317994
Unigene0053138	chr5	6317975	6320485
Unigene0054847	chr5	6320465	6322797
Unigene0059530	chr5	6322815	6323785
Unigene0059957	chr5	6323763	6324501
Unigene0044239	chr5	6332479	6334377
Unigene0043533	chr5	6334356	6334757
Unigene0019552	chr5	6334740	6335658
Unigene0019555	chr5	6334740	6337499
Unigene0082661	chr5	6334740	6337499
Unigene0019553	chr5	6335552	6337499
Unigene0029721	chr5	6365655	6368916
Unigene0053721	chr5	6394007	6395273
Unigene0008639	chr5	6405279	6412897
Unigene0014426	chr5	6434099	6438344
Unigene0004855	chr5	6451095	6455638
Unigene0004856	chr5	6451095	6455638
Unigene0032689	chr5	6464976	6480444
Unigene0032689	chr5	6514024	6515343
Unigene0049287	chr5	6538765	6539730
Unigene0048420	chr5	6539708	6540818
Unigene0048635	chr5	6540795	6541568
Unigene0047682	chr5	6541699	6542623
Unigene0050440	chr5	6588761	6591061
Unigene0003814	chr5	6593628	6599505
Unigene0010994	chr5	6647302	6653427
Unigene0048472	chr5	6678054	6679163
Unigene0044551	chr5	6679740	6682438
Unigene0083416	chr5	6707555	6709915
Unigene0004955	chr5	6787050	6793671
Unigene0036177	chr5	6831555	6837524
Unigene0031906	chr5	6968857	6973665
Unigene0079026	chr5	7065328	7065532
Unigene0049320	chr5	7070242	7071415
Unigene0037681	chr5	7094943	7097694
Unigene0011887	chr5	7099167	7101789
Unigene0011888	chr5	7099167	7101789
Unigene0011886	chr5	7100474	7101789
Unigene0044573	chr5	7107501	7126446
Unigene0042172	chr5	7158298	7163744
Unigene0042364	chr5	7291578	7295742
Unigene0022389	chr5	7296937	7301109
Unigene0051353	chr5	7306405	7307238
Unigene0023361	chr5	7311206	7315252
Unigene0015260	chr5	7328417	7331637
Unigene0015261	chr5	7328417	7331637
Unigene0008967	chr5	7335878	7341853
Unigene0033263	chr5	7360623	7362066
Unigene0033266	chr5	7360623	7361594
Unigene0017797	chr5	7379386	7386887
Unigene0057510	chr5	7388621	7389424
Unigene0044493	chr5	7416849	7424574
Unigene0067764	chr5	7437631	7437866
Unigene0030983	chr5	7442772	7449508
Unigene0002741	chr5	7590239	7597346
Unigene0043147	chr5	7620888	7624284
Unigene0044235	chr5	7633445	7636563
Unigene0051745	chr5	7644068	7645062
Unigene0029646	chr5	7645290	7646034
Unigene0051727	chr5	7646043	7646374
Unigene0041262	chr5	7650071	7653275
Unigene0085581	chr5	7657397	7658857
Unigene0045956	chr5	7660566	7663641
Unigene0086304	chr5	7729339	7731239
Unigene0042417	chr5	7753258	7756188
Unigene0086761	chr5	7785922	7789596
Unigene0024926	chr5	7812609	7816495
Unigene0024929	chr5	7812609	7816495
Unigene0033014	chr5	7821068	7823084
Unigene0003799	chr5	7857011	7865283
Unigene0080162	chr5	7861357	7861600
Unigene0085601	chr5	7866633	7869360
Unigene0004435	chr5	7880128	7881465
Unigene0020692	chr5	7880586	7885693
Unigene0007737	chr5	7899855	7900646
Unigene0024909	chr5	7900264	7904598
Unigene0024910	chr5	7900264	7904598
Unigene0024913	chr5	7900264	7904598
Unigene0045337	chr5	7910655	7917095
Unigene0009991	chr5	7919560	7927761
Unigene0009992	chr5	7919560	7927761
Unigene0009993	chr5	7919560	7927761
Unigene0009994	chr5	7919560	7927761
Unigene0008634	chr5	7933810	7938787
Unigene0004436	chr5	7943842	7946950
Unigene0047858	chr5	8011255	8011784
Unigene0020365	chr5	8011772	8014272
Unigene0032316	chr5	8017835	8018464
Unigene0032315	chr5	8019073	8025588
Unigene0032317	chr5	8019073	8019595
Unigene0044932	chr5	8047214	8053936
Unigene0006627	chr5	8066924	8072436
Unigene0015256	chr5	8073476	8077166
Unigene0015258	chr5	8073476	8077166
Unigene0004507	chr5	8095111	8098072
Unigene0004508	chr5	8095111	8098072
Unigene0060630	chr5	8119771	8119984
Unigene0070003	chr5	8119991	8120956
Unigene0039057	chr5	8156860	8157231
Unigene0041941	chr5	8166835	8167027
Unigene0009231	chr5	8166972	8167417
Unigene0065124	chr5	8192095	8192374
Unigene0024676	chr5	8192368	8195624
Unigene0024675	chr5	8192430	8195624
Unigene0071148	chr5	8193256	8193843
Unigene0058159	chr5	8253467	8253895
Unigene0002290	chr5	8296463	8298118
Unigene0026900	chr5	8333955	8361247
Unigene0009625	chr5	8371926	8377778
Unigene0009626	chr5	8371926	8376984
Unigene0009627	chr5	8371926	8377778
Unigene0041531	chr5	8532066	8535617
Unigene0004911	chr5	8588336	8591560
Unigene0013411	chr5	8607200	8613732
Unigene0013412	chr5	8607200	8607637
Unigene0082540	chr5	8608086	8609118
Unigene0071177	chr5	8609607	8609876
Unigene0061113	chr5	8610180	8610577
Unigene0072883	chr5	8611262	8611895
Unigene0074338	chr5	8612890	8613240
Unigene0013413	chr5	8613520	8613732
Unigene0010823	chr5	8631435	8636691
Unigene0064764	chr5	8641316	8641498
Unigene0054965	chr5	8641569	8642194
Unigene0042205	chr5	8646315	8650642
Unigene0008774	chr5	8656830	8659393
Unigene0009212	chr5	8660664	8672424
Unigene0009213	chr5	8660664	8672424
Unigene0009214	chr5	8660664	8672424
Unigene0009215	chr5	8660664	8672424
Unigene0013029	chr5	8706778	8711017
Unigene0013030	chr5	8706778	8711017
Unigene0002933	chr5	8712938	8715539
Unigene0041346	chr5	8716912	8721441
Unigene0052809	chr5	8753917	8754451
Unigene0014600	chr5	8797434	8799966
Unigene0084353	chr5	8797434	8802089
Unigene0047244	chr5	8826629	8828506
Unigene0041965	chr5	8835168	8842755
Unigene0013484	chr5	8846390	8850861
Unigene0077309	chr5	8860593	8860731
Unigene0014554	chr5	8873177	8881895
Unigene0014555	chr5	8873177	8881322
Unigene0043697	chr5	8900469	8901563
Unigene0014594	chr5	8908381	8910622
Unigene0014595	chr5	8908381	8910622
Unigene0014596	chr5	8908381	8910622
Unigene0022009	chr5	8923421	8926791
Unigene0022000	chr5	8925181	8926791
Unigene0022006	chr5	8925181	8926791
Unigene0022007	chr5	8925181	8926791
Unigene0074521	chr5	8935491	8935660
Unigene0030014	chr5	8944819	8953053
Unigene0030015	chr5	8944819	8953053
Unigene0030016	chr5	8944819	8953053
Unigene0030017	chr5	8944819	8953053
Unigene0030018	chr5	8944819	8953053
Unigene0030019	chr5	8944819	8953053
Unigene0030020	chr5	8944819	8953053
Unigene0030021	chr5	8944819	8953053
Unigene0030022	chr5	8944819	8953053
Unigene0030023	chr5	8944819	8950886
Unigene0030024	chr5	8944819	8953053
Unigene0030025	chr5	8944819	8953053
Unigene0030026	chr5	8944819	8953053
Unigene0030027	chr5	8944819	8953053
Unigene0030028	chr5	8944819	8953053
Unigene0030029	chr5	8944819	8953053
Unigene0030030	chr5	8944819	8953053
Unigene0030031	chr5	8944819	8953053
Unigene0030032	chr5	8944819	8953053
Unigene0030033	chr5	8944819	8953053
Unigene0030034	chr5	8944819	8953053
Unigene0030035	chr5	8944819	8953053
Unigene0030036	chr5	8944819	8953053
Unigene0030037	chr5	8944819	8953053
Unigene0030038	chr5	8944819	8953053
Unigene0030039	chr5	8944819	8953053
Unigene0030040	chr5	8944819	8953053
Unigene0030041	chr5	8944819	8953053
Unigene0030042	chr5	8944819	8953053
Unigene0030043	chr5	8944819	8953053
Unigene0030044	chr5	8944819	8953053
Unigene0030045	chr5	8944819	8953053
Unigene0030046	chr5	8944819	8953053
Unigene0030047	chr5	8944819	8953053
Unigene0030048	chr5	8944819	8953053
Unigene0030049	chr5	8944819	8953053
Unigene0030050	chr5	8944819	8950886
Unigene0030051	chr5	8944819	8953053
Unigene0030052	chr5	8944819	8953053
Unigene0030053	chr5	8944819	8953053
Unigene0030054	chr5	8944819	8953053
Unigene0030055	chr5	8944819	8953053
Unigene0010788	chr5	8956364	8957939
Unigene0010789	chr5	8956364	8957939
Unigene0009031	chr5	8979277	8979474
Unigene0071294	chr5	8981994	8984151
Unigene0066673	chr5	8999228	8999541
Unigene0055982	chr5	9127641	9128538
Unigene0046907	chr5	9173822	9174024
Unigene0010499	chr5	9192588	9202931
Unigene0010500	chr5	9192588	9203053
Unigene0010501	chr5	9192588	9203053
Unigene0010502	chr5	9192588	9202986
Unigene0044463	chr5	9211370	9212137
Unigene0013650	chr5	9212122	9213165
Unigene0013651	chr5	9212122	9213165
Unigene0013652	chr5	9212122	9213165
Unigene0044561	chr5	9233226	9233613
Unigene0045642	chr5	9304012	9314272
Unigene0019760	chr5	9322370	9323198
Unigene0041750	chr5	9410315	9413448
Unigene0004152	chr5	9423426	9427159
Unigene0013390	chr5	9445704	9448352
Unigene0013391	chr5	9446888	9448352
Unigene0030584	chr5	9501191	9502259
Unigene0030585	chr5	9501191	9504758
Unigene0006560	chr5	9530288	9535160
Unigene0084870	chr5	9537135	9539481
Unigene0015594	chr5	9542902	9544295
Unigene0029377	chr5	9692845	9693217
Unigene0029380	chr5	9693094	9694308
Unigene0003145	chr5	9708709	9711707
Unigene0045581	chr5	9737265	9738252
Unigene0008165	chr5	9741394	9752147
Unigene0008166	chr5	9741394	9752147
Unigene0031237	chr5	9789766	9790273
Unigene0019864	chr5	9853395	9857628
Unigene0019867	chr5	9853395	9857628
Unigene0071559	chr5	9854740	9855014
Unigene0083146	chr5	9862815	9866946
Unigene0083147	chr5	9862815	9866946
Unigene0085079	chr5	9862815	9866946
Unigene0085080	chr5	9862815	9866946
Unigene0078722	chr5	9863822	9863961
Unigene0050052	chr5	10003546	10003839
Unigene0026144	chr5	10012788	10016508
Unigene0005547	chr5	10048400	10057351
Unigene0005548	chr5	10048400	10057351
Unigene0082432	chr5	10086370	10091515
Unigene0084788	chr5	10086370	10091515
Unigene0087022	chr5	10086370	10091515
Unigene0046652	chr5	10115394	10118997
Unigene0061037	chr5	10116818	10117038
Unigene0064923	chr5	10125733	10126220
Unigene0013912	chr5	10126232	10126851
Unigene0070266	chr5	10127095	10127495
Unigene0076542	chr5	10127686	10128033
Unigene0066310	chr5	10128132	10128605
Unigene0005532	chr5	10129209	10134741
Unigene0005533	chr5	10129209	10134741
Unigene0050477	chr5	10165468	10165891
Unigene0001954	chr5	10165872	10168178
Unigene0001955	chr5	10165872	10168178
Unigene0079514	chr5	10220612	10220861
Unigene0059693	chr5	10248986	10249512
Unigene0014435	chr5	10317204	10321482
Unigene0086269	chr5	10410519	10415846
Unigene0087040	chr5	10410519	10415470
Unigene0012473	chr5	10449882	10457496
Unigene0068174	chr5	10452907	10453179
Unigene0087012	chr5	10509609	10516415
Unigene0018266	chr5	10526025	10530614
Unigene0018267	chr5	10526025	10530614
Unigene0007427	chr5	10538760	10539639
Unigene0048466	chr5	10540306	10540752
Unigene0021056	chr5	10540742	10541619
Unigene0021057	chr5	10540742	10541619
Unigene0076525	chr5	10583512	10583823
Unigene0016506	chr5	10583987	10584317
Unigene0079084	chr5	10584299	10584546
Unigene0050185	chr5	10586950	10587956
Unigene0051340	chr5	10587933	10589256
Unigene0020250	chr5	10598421	10603894
Unigene0020251	chr5	10598421	10603894
Unigene0020255	chr5	10598421	10603894
Unigene0085033	chr5	10598421	10603894
Unigene0020249	chr5	10601291	10603894
Unigene0031237	chr5	10610120	10610531
Unigene0031237	chr5	10615612	10616023
Unigene0031237	chr5	10620683	10621094
Unigene0031237	chr5	10625754	10626165
Unigene0031237	chr5	10630826	10631237
Unigene0031237	chr5	10635901	10636312
Unigene0031237	chr5	10639816	10640227
Unigene0042862	chr5	10642511	10651392
Unigene0042777	chr5	10672072	10674893
Unigene0050522	chr5	10683869	10684337
Unigene0045933	chr5	10688682	10702191
Unigene0010143	chr5	10710581	10721950
Unigene0010144	chr5	10710581	10721950
Unigene0002274	chr5	10713968	10714354
Unigene0053641	chr5	10717112	10718450
Unigene0060318	chr5	10724153	10725520
Unigene0059874	chr5	10733293	10734492
Unigene0068929	chr5	10735285	10735541
Unigene0061402	chr5	10735804	10736869
Unigene0064701	chr5	10736878	10737963
Unigene0045278	chr5	10738329	10743280
Unigene0047257	chr5	10743246	10746370
Unigene0045822	chr5	10748628	10749797
Unigene0016297	chr5	10749853	10767888
Unigene0017662	chr5	10777566	10778572
Unigene0006211	chr5	10820351	10826365
Unigene0006212	chr5	10820351	10826365
Unigene0008676	chr5	10903425	10906999
Unigene0042395	chr5	10915235	10922846
Unigene0044700	chr5	10917883	10918268
Unigene0059878	chr5	10946923	10947507
Unigene0006782	chr5	10949018	10949661
Unigene0013082	chr5	10949638	10952398
Unigene0020812	chr5	10997384	11001609
Unigene0020814	chr5	10999013	11001609
Unigene0011412	chr5	11012179	11014367
Unigene0011413	chr5	11012179	11014367
Unigene0034588	chr5	11031121	11044259
Unigene0030452	chr5	11046759	11049338
Unigene0030455	chr5	11046759	11049338
Unigene0030459	chr5	11046759	11049128
Unigene0030461	chr5	11046759	11049128
Unigene0083893	chr5	11046759	11050478
Unigene0085230	chr5	11046759	11050478
Unigene0086679	chr5	11046759	11050478
Unigene0047250	chr5	11060405	11061178
Unigene0005849	chr5	11061178	11098586
Unigene0005850	chr5	11061178	11063913
Unigene0047250	chr5	11096912	11097305
Unigene0066947	chr5	11157993	11160195
Unigene0045515	chr5	11207322	11213201
Unigene0041875	chr5	11224087	11227573
Unigene0009032	chr5	11346885	11353277
Unigene0043135	chr5	11363715	11369346
Unigene0062962	chr5	11375555	11376142
Unigene0062962	chr5	11394024	11394648
Unigene0041537	chr5	11427308	11432379
Unigene0045154	chr5	11435530	11441610
Unigene0006324	chr5	11452195	11456157
Unigene0006325	chr5	11452195	11456157
Unigene0018748	chr5	11457229	11460187
Unigene0018749	chr5	11457229	11460187
Unigene0043019	chr5	11616595	11617779
Unigene0011469	chr5	11977073	11983973
Unigene0011470	chr5	11977073	11983973
Unigene0044456	chr5	11991740	11996356
Unigene0042181	chr5	12022293	12029341
Unigene0051075	chr5	12023107	12023504
Unigene0047666	chr5	12053346	12060431
Unigene0003989	chr5	12096177	12096801
Unigene0047517	chr5	12096791	12102113
Unigene0065212	chr5	12100262	12100770
Unigene0084528	chr5	12211635	12215562
Unigene0015596	chr5	12267082	12276275
Unigene0005195	chr5	12276299	12276513
Unigene0043776	chr5	12358975	12362135
Unigene0080100	chr5	12439645	12439796
Unigene0002676	chr5	12485633	12486532
Unigene0045863	chr5	12501851	12502474
Unigene0008154	chr5	12586381	12588257
Unigene0046376	chr5	12599611	12601078
Unigene0012083	chr5	12604307	12613933
Unigene0012084	chr5	12604307	12613933
Unigene0074759	chr5	12618109	12618215
Unigene0035761	chr5	12618628	12622531
Unigene0001436	chr5	12622251	12622461
Unigene0087135	chr5	12637441	12643853
Unigene0018938	chr5	12694511	12697994
Unigene0041428	chr5	12698168	12699992
Unigene0009886	chr5	12786568	12791907
Unigene0014057	chr5	12795120	12799070
Unigene0082418	chr5	12795120	12799070
Unigene0075418	chr5	12815989	12816498
Unigene0045408	chr5	12825582	12826268
Unigene0011569	chr5	12829262	12837103
Unigene0041943	chr5	12838132	12843077
Unigene0050646	chr5	13054917	13055934
Unigene0003300	chr5	13067595	13074379
Unigene0003301	chr5	13067595	13074379
Unigene0006960	chr5	13079135	13085790
Unigene0006961	chr5	13079135	13085790
Unigene0055220	chr5	13087516	13088369
Unigene0055220	chr5	13134184	13135059
Unigene0058811	chr5	13134806	13136024
Unigene0075719	chr5	13197081	13197357
Unigene0019241	chr5	13204461	13211547
Unigene0025662	chr5	13295772	13307635
Unigene0025661	chr5	13302190	13307635
Unigene0025663	chr5	13302190	13307635
Unigene0011403	chr5	13352237	13355516
Unigene0011327	chr5	13375013	13379276
Unigene0011328	chr5	13375013	13379276
Unigene0081415	chr5	13411016	13422011
Unigene0081416	chr5	13411016	13420539
Unigene0073341	chr5	13414937	13415082
Unigene0076007	chr5	13467883	13468257
Unigene0037975	chr5	13468626	13469014
Unigene0037973	chr5	13470427	13475331
Unigene0060804	chr5	13565732	13567196
Unigene0057245	chr5	13567896	13568636
Unigene0064850	chr5	13568616	13569136
Unigene0027971	chr5	13701814	13705682
Unigene0027972	chr5	13701814	13705682
Unigene0050476	chr5	13707610	13708027
Unigene0082060	chr5	13810251	13813303
Unigene0033375	chr5	13824506	13830252
Unigene0033377	chr5	13824506	13832507
Unigene0033378	chr5	13824506	13830252
Unigene0033380	chr5	13824506	13830252
Unigene0033383	chr5	13824506	13832507
Unigene0033385	chr5	13824506	13830252
Unigene0033386	chr5	13824506	13832507
Unigene0033387	chr5	13824506	13832507
Unigene0033389	chr5	13824506	13832507
Unigene0033390	chr5	13824506	13830252
Unigene0033391	chr5	13824506	13830252
Unigene0033392	chr5	13824506	13830252
Unigene0033395	chr5	13824506	13830252
Unigene0033398	chr5	13824506	13832507
Unigene0033399	chr5	13824506	13832507
Unigene0033405	chr5	13824506	13832507
Unigene0081603	chr5	13824506	13832507
Unigene0083234	chr5	13824506	13832507
Unigene0083287	chr5	13824506	13832507
Unigene0083290	chr5	13824506	13832507
Unigene0084460	chr5	13824506	13832507
Unigene0085205	chr5	13824506	13832507
Unigene0085852	chr5	13824506	13832507
Unigene0085883	chr5	13824506	13832507
Unigene0033374	chr5	13825482	13832507
Unigene0033379	chr5	13825482	13832507
Unigene0033382	chr5	13825482	13832507
Unigene0033388	chr5	13825482	13830252
Unigene0033401	chr5	13825482	13830252
Unigene0033402	chr5	13825482	13830252
Unigene0033403	chr5	13825482	13832507
Unigene0033407	chr5	13825482	13830252
Unigene0081602	chr5	13825482	13832507
Unigene0083289	chr5	13825482	13832507
Unigene0084461	chr5	13825482	13832507
Unigene0085206	chr5	13825482	13832507
Unigene0033376	chr5	13825524	13830252
Unigene0033381	chr5	13825524	13830252
Unigene0033384	chr5	13825524	13830252
Unigene0033393	chr5	13825524	13832507
Unigene0033394	chr5	13825524	13830252
Unigene0033397	chr5	13825524	13832507
Unigene0033400	chr5	13825524	13832507
Unigene0033406	chr5	13825524	13832507
Unigene0083235	chr5	13825524	13832507
Unigene0083288	chr5	13825524	13832507
Unigene0085851	chr5	13825524	13832507
Unigene0085884	chr5	13825524	13832507
Unigene0041444	chr5	13869112	13870362
Unigene0008956	chr5	13870371	13872853
Unigene0042465	chr5	13870987	13871398
Unigene0020629	chr5	13871376	13871927
Unigene0020630	chr5	13871376	13871927
Unigene0020632	chr5	13871376	13871708
Unigene0043058	chr5	13904180	13912268
Unigene0045106	chr5	13937084	13941352
Unigene0082060	chr5	13947791	13952390
Unigene0044640	chr5	13999621	14000590
Unigene0044801	chr5	14000688	14003577
Unigene0044187	chr5	14003561	14005289
Unigene0046732	chr5	14043024	14047036
Unigene0010006	chr5	14068083	14072538
Unigene0057320	chr5	14068951	14069183
Unigene0062729	chr5	14090692	14091676
Unigene0014232	chr5	14118424	14125284
Unigene0086780	chr5	14118424	14126840
Unigene0017938	chr5	14156109	14157027
Unigene0044317	chr5	14157736	14161949
Unigene0004717	chr5	14169882	14174901
Unigene0009162	chr5	14230664	14235667
Unigene0009161	chr5	14230898	14235667
Unigene0018382	chr5	14239095	14242234
Unigene0018383	chr5	14239095	14242456
Unigene0017657	chr5	14250911	14251108
Unigene0017655	chr5	14251130	14251468
Unigene0045409	chr5	14308664	14312902
Unigene0044390	chr5	14312574	14313624
Unigene0045400	chr5	14321605	14332234
Unigene0033346	chr5	14335393	14336878
Unigene0033339	chr5	14339157	14339828
Unigene0085716	chr5	14356565	14362287
Unigene0007872	chr5	14368695	14369384
Unigene0031515	chr5	14388361	14391384
Unigene0031521	chr5	14388361	14391384
Unigene0031525	chr5	14388361	14391384
Unigene0031519	chr5	14388881	14391384
Unigene0002299	chr5	14398211	14403316
Unigene0001618	chr5	14466132	14466622
Unigene0006941	chr5	14497153	14503501
Unigene0006942	chr5	14497153	14503501
Unigene0016427	chr5	14505334	14512833
Unigene0016429	chr5	14505334	14512833
Unigene0016428	chr5	14505951	14512833
Unigene0066243	chr5	14516042	14516940
Unigene0017111	chr5	14526551	14531733
Unigene0046277	chr5	14666273	14667906
Unigene0046993	chr5	14667893	14668997
Unigene0046017	chr5	14668977	14671471
Unigene0004068	chr5	14672423	14673582
Unigene0005014	chr5	14676862	14677632
Unigene0041828	chr5	14693664	14705214
Unigene0056899	chr5	14704056	14704987
Unigene0042619	chr5	14709097	14711805
Unigene0033036	chr5	14763131	14775155
Unigene0040546	chr5	14816028	14824554
Unigene0040557	chr5	14816028	14819462
Unigene0040559	chr5	14816028	14823011
Unigene0040572	chr5	14816028	14824554
Unigene0040585	chr5	14816028	14824554
Unigene0040590	chr5	14816028	14819462
Unigene0040595	chr5	14816028	14819462
Unigene0040596	chr5	14816028	14819462
Unigene0040602	chr5	14816028	14817197
Unigene0040603	chr5	14816028	14824554
Unigene0040605	chr5	14816028	14823011
Unigene0040607	chr5	14816028	14819462
Unigene0040608	chr5	14816028	14817197
Unigene0040620	chr5	14816028	14819462
Unigene0040622	chr5	14816028	14824554
Unigene0040624	chr5	14816028	14824554
Unigene0040625	chr5	14816028	14824554
Unigene0040632	chr5	14816028	14819462
Unigene0040636	chr5	14816028	14819462
Unigene0082087	chr5	14816028	14819462
Unigene0082100	chr5	14816028	14819462
Unigene0082103	chr5	14816028	14824554
Unigene0082108	chr5	14816028	14819462
Unigene0082109	chr5	14816028	14819462
Unigene0082112	chr5	14816028	14824554
Unigene0082113	chr5	14816028	14824554
Unigene0082125	chr5	14816028	14824554
Unigene0082131	chr5	14816028	14819462
Unigene0082146	chr5	14816028	14824554
Unigene0082150	chr5	14816028	14824554
Unigene0082152	chr5	14816028	14819462
Unigene0082160	chr5	14816028	14823011
Unigene0082161	chr5	14816028	14819462
Unigene0040540	chr5	14817544	14823011
Unigene0040582	chr5	14817544	14819462
Unigene0040599	chr5	14817544	14824554
Unigene0040628	chr5	14817544	14823011
Unigene0040580	chr5	14818211	14823011
Unigene0040587	chr5	14818211	14819462
Unigene0040633	chr5	14818211	14823011
Unigene0040577	chr5	14818293	14823011
Unigene0046562	chr5	14830589	14832070
Unigene0021357	chr5	14861200	14862019
Unigene0041339	chr5	14888509	14891041
Unigene0055985	chr5	14908145	14908553
Unigene0037015	chr5	14909639	14910345
Unigene0046221	chr5	14979193	14981207
Unigene0044389	chr5	15056141	15062832
Unigene0068767	chr5	15125338	15125606
Unigene0042498	chr5	15127329	15132085
Unigene0063870	chr5	15166460	15166631
Unigene0077993	chr5	15201562	15201750
Unigene0035207	chr5	15375371	15376751
Unigene0035229	chr5	15375371	15376648
Unigene0034089	chr5	15403245	15403473
Unigene0042852	chr5	15442853	15449025
Unigene0045295	chr5	15555324	15557791
Unigene0009199	chr5	15583818	15592004
Unigene0046181	chr5	15598731	15601234
Unigene0003621	chr5	15782746	15785403
Unigene0042501	chr5	15803391	15807930
Unigene0044229	chr5	15806403	15806668
Unigene0048050	chr5	15809560	15809928
Unigene0047978	chr5	15809898	15810858
Unigene0047617	chr5	15810836	15811637
Unigene0083162	chr5	15811931	15822612
Unigene0086582	chr5	15811931	15822612
Unigene0035455	chr5	15812367	15822612
Unigene0083163	chr5	15812367	15822612
Unigene0080323	chr5	15819949	15820112
Unigene0002395	chr5	15823523	15827101
Unigene0022160	chr5	15847862	15851494
Unigene0005810	chr5	15871751	15874231
Unigene0003275	chr5	15888179	15891725
Unigene0051110	chr5	15891944	15893083
Unigene0048637	chr5	15897223	15898590
Unigene0030985	chr5	15953977	15955807
Unigene0060496	chr5	16151891	16152161
Unigene0082881	chr5	16285548	16288905
Unigene0005106	chr5	16335878	16336963
Unigene0003021	chr5	16450448	16450855
Unigene0003022	chr5	16450448	16452229
Unigene0047964	chr5	16462284	16463351
Unigene0026299	chr5	16468920	16469615
Unigene0057972	chr5	16484722	16485666
Unigene0004409	chr5	16499070	16502997
Unigene0034490	chr5	16523654	16524235
Unigene0006765	chr5	16674513	16678010
Unigene0006766	chr5	16674513	16678010
Unigene0043365	chr5	16690741	16695672
Unigene0034486	chr5	16696241	16696558
Unigene0034487	chr5	16700669	16702111
Unigene0034489	chr5	16700669	16702601
Unigene0055068	chr5	16703175	16703420
Unigene0049036	chr5	16755843	16756694
Unigene0047363	chr5	16787367	16790965
Unigene0041920	chr5	16800029	16801385
Unigene0033517	chr5	16829706	16832532
Unigene0033518	chr5	16829706	16832532
Unigene0085315	chr5	17226864	17229716
Unigene0083765	chr5	17248803	17256084
Unigene0020734	chr5	17282346	17285472
Unigene0044823	chr5	17339578	17341815
Unigene0082677	chr5	17442124	17442723
Unigene0016658	chr5	17442157	17442723
Unigene0016659	chr5	17442157	17442723
Unigene0059744	chr5	17442803	17443523
Unigene0043860	chr5	17448626	17453569
Unigene0005588	chr5	17473020	17477359
Unigene0048539	chr5	17612851	17613322
Unigene0046892	chr5	17613306	17614422
Unigene0048539	chr5	17618802	17636843
Unigene0003721	chr5	17682145	17686197
Unigene0071689	chr5	17742164	17742314
Unigene0052929	chr5	17754934	17755298
Unigene0049672	chr5	17829834	17831373
Unigene0020538	chr5	17929795	17931253
Unigene0020537	chr5	17930594	17931253
Unigene0005154	chr5	17986185	17988433
Unigene0021629	chr5	18005532	18009699
Unigene0052038	chr5	18101599	18103242
Unigene0045633	chr5	18130938	18136662
Unigene0030121	chr5	18213598	18215696
Unigene0082376	chr5	18213600	18215479
Unigene0085806	chr5	18223734	18229469
Unigene0086541	chr5	18223734	18229469
Unigene0036046	chr5	18223876	18229469
Unigene0036050	chr5	18223876	18229796
Unigene0036053	chr5	18223876	18229469
Unigene0036063	chr5	18223876	18229796
Unigene0036056	chr5	18224288	18229796
Unigene0036061	chr5	18224288	18229796
Unigene0085807	chr5	18224288	18229469
Unigene0086542	chr5	18224288	18229469
Unigene0036054	chr5	18226077	18229796
Unigene0036065	chr5	18226077	18229469
Unigene0082441	chr5	18226077	18229469
Unigene0036055	chr5	18226101	18229796
Unigene0082567	chr5	18226101	18229469
Unigene0083688	chr5	18226101	18229469
Unigene0083719	chr5	18226101	18229469
Unigene0085803	chr5	18226101	18229469
Unigene0085804	chr5	18226101	18229469
Unigene0005281	chr5	18240512	18244028
Unigene0003428	chr5	18265474	18269626
Unigene0006348	chr5	18271493	18274726
Unigene0019830	chr5	18283763	18290883
Unigene0019831	chr5	18283763	18290883
Unigene0047357	chr5	18305509	18305747
Unigene0047278	chr5	18305777	18310062
Unigene0086982	chr5	18317941	18323256
Unigene0051566	chr5	18452449	18456786
Unigene0010810	chr5	18481048	18488560
Unigene0010811	chr5	18481048	18488560
Unigene0010812	chr5	18481048	18488560
Unigene0010813	chr5	18481048	18488560
Unigene0041725	chr5	18489792	18491294
Unigene0041337	chr5	18491272	18491798
Unigene0009644	chr5	18528744	18533025
Unigene0027063	chr5	18553795	18559448
Unigene0027065	chr5	18553795	18559448
Unigene0027066	chr5	18555514	18559448
Unigene0039903	chr5	18696935	18700662
Unigene0039910	chr5	18696935	18700662
Unigene0005951	chr5	18721820	18723087
Unigene0015731	chr5	18722997	18729348
Unigene0003337	chr5	18726509	18729045
Unigene0003338	chr5	18726509	18728098
Unigene0031917	chr5	18738317	18738549
Unigene0046430	chr5	18779854	18781010
Unigene0042419	chr5	18828215	18832718
Unigene0066640	chr5	18836389	18836675
Unigene0082040	chr5	18878451	18879473
Unigene0041679	chr5	18910163	18911939
Unigene0019421	chr5	18953422	18958246
Unigene0019422	chr5	18953422	18958246
Unigene0019423	chr5	18953422	18958246
Unigene0019424	chr5	18953422	18958246
Unigene0041565	chr5	18997999	19000683
Unigene0053612	chr5	19022254	19026224
Unigene0009404	chr5	19035679	19037347
Unigene0038840	chr5	19209214	19215726
Unigene0038851	chr5	19209214	19213354
Unigene0038853	chr5	19209214	19215726
Unigene0038854	chr5	19209214	19213354
Unigene0038858	chr5	19213680	19215726
Unigene0029377	chr5	19277884	19278069
Unigene0029380	chr5	19278134	19278815
Unigene0050250	chr5	19278140	19278368
Unigene0051453	chr5	19280786	19281005
Unigene0047179	chr5	19308206	19310044
Unigene0044877	chr5	19312479	19316512
Unigene0082032	chr5	19317519	19321674
Unigene0086194	chr5	19317519	19321674
Unigene0027921	chr5	19396503	19408570
Unigene0027923	chr5	19396503	19408570
Unigene0027924	chr5	19396503	19408570
Unigene0027925	chr5	19396503	19408570
Unigene0037045	chr5	19468019	19471087
Unigene0080801	chr5	19525890	19526005
Unigene0064545	chr5	19527213	19527380
Unigene0061078	chr5	19527363	19527554
Unigene0070384	chr5	19528886	19529078
Unigene0037874	chr5	19558977	19560041
Unigene0001359	chr5	19590380	19591162
Unigene0071226	chr5	19591161	19594463
Unigene0068673	chr5	19594729	19594998
Unigene0022079	chr5	19659949	19660282
Unigene0078398	chr5	19714837	19715151
Unigene0069578	chr5	19715363	19715617
Unigene0059659	chr5	19715600	19716754
Unigene0056915	chr5	19716736	19716945
Unigene0016730	chr5	19761331	19764011
Unigene0004733	chr5	19852264	19854569
Unigene0004802	chr5	19992643	19999797
Unigene0027724	chr5	20020568	20021288
Unigene0012160	chr5	20213767	20215026
Unigene0012161	chr5	20213767	20214963
Unigene0082442	chr5	20285298	20289235
Unigene0079665	chr5	20344790	20345069
Unigene0000875	chr5	20395185	20395434
Unigene0000875	chr5	20421540	20421789
Unigene0040213	chr5	20523932	20524109
Unigene0004057	chr5	20567066	20567264
Unigene0041532	chr5	20630724	20635027
Unigene0001781	chr5	20638197	20639843
Unigene0023164	chr5	20711512	20717722
Unigene0023165	chr5	20711512	20717722
Unigene0023166	chr5	20711512	20719460
Unigene0023167	chr5	20711512	20719460
Unigene0023169	chr5	20711512	20719460
Unigene0007791	chr5	20781945	20788222
Unigene0021981	chr5	20915999	21201600
Unigene0021981	chr5	21083808	21115493
Unigene0021981	chr5	21101441	21224929
Unigene0021981	chr5	21111199	21220005
Unigene0021981	chr5	21118100	21237152
Unigene0021981	chr5	21121339	21179331
Unigene0021981	chr5	21127792	21168794
Unigene0021981	chr5	21134621	21204696
Unigene0021981	chr5	21142593	21152231
Unigene0021981	chr5	21155318	21234611
Unigene0021981	chr5	21174019	21264433
Unigene0021981	chr5	21197032	21237203
Unigene0021981	chr5	21205880	21255845
Unigene0021981	chr5	21228265	21255444
Unigene0021981	chr5	21240287	21265603
Unigene0031651	chr5	21408491	21411656
Unigene0014836	chr5	21416914	21422301
Unigene0014837	chr5	21416914	21420869
Unigene0015961	chr5	21422502	21426224
Unigene0015963	chr5	21422502	21426224
Unigene0006929	chr5	21479370	21483862
Unigene0006930	chr5	21479370	21483862
Unigene0066669	chr5	21618578	21618793
Unigene0050167	chr5	21648481	21649093
Unigene0004295	chr5	21652010	21667541
Unigene0003941	chr5	21674482	21682508
Unigene0051053	chr5	21753813	21754289
Unigene0014787	chr5	21878988	21882712
Unigene0021586	chr5	21973371	21984548
Unigene0021587	chr5	21973371	21984548
Unigene0060497	chr5	22005971	22006770
Unigene0062088	chr5	22006773	22009018
Unigene0057443	chr5	22009995	22010435
Unigene0044412	chr5	22024062	22028116
Unigene0023275	chr5	22031034	22033297
Unigene0023272	chr5	22031124	22033297
Unigene0021738	chr5	22072608	22075432
Unigene0020108	chr5	22182075	22186301
Unigene0060225	chr5	22192150	22192958
Unigene0076688	chr5	22274249	22274407
Unigene0066339	chr5	22299190	22299517
Unigene0032866	chr5	22506533	22508704
Unigene0032867	chr5	22506533	22509953
Unigene0002376	chr5	22618052	22624385
Unigene0002377	chr5	22618052	22624385
Unigene0048698	chr5	22729549	22729823
Unigene0048647	chr5	22729805	22730570
Unigene0006732	chr5	22744989	22748542
Unigene0003957	chr5	22778892	22783190
Unigene0003958	chr5	22778892	22783190
Unigene0039590	chr5	23263280	23269070
Unigene0038186	chr5	23436633	23436767
Unigene0056706	chr5	23507227	23507535
Unigene0008945	chr5	23801663	23809048
Unigene0049929	chr5	23816316	23816521
Unigene0039944	chr5	23881629	23885968
Unigene0041999	chr5	23890866	23894896
Unigene0081594	chr5	24140012	24143532
Unigene0036638	chr5	24140282	24143532
Unigene0036639	chr5	24140282	24143532
Unigene0081594	chr5	24150124	24234187
Unigene0036639	chr5	24150364	24325846
Unigene0036638	chr5	24150502	24234187
Unigene0081594	chr5	24165198	24234246
Unigene0036639	chr5	24165862	24234246
Unigene0036638	chr5	24165985	24234246
Unigene0036640	chr5	24166357	24234246
Unigene0036639	chr5	24191568	24234187
Unigene0004830	chr5	24297077	24351509
Unigene0081594	chr5	24318337	24325846
Unigene0036638	chr5	24319136	24325846
Unigene0036640	chr5	24319546	24325846
Unigene0047673	chr5	24590688	24598864
Unigene0008761	chr5	24907486	24911507
Unigene0001431	chr5	24911491	24912261
Unigene0083155	chr5	24920338	24927614
Unigene0023788	chr5	24925841	24927614
Unigene0023789	chr5	24926717	24927614
Unigene0076698	chr5	25017958	25020482
Unigene0064324	chr5	25070295	25070741
Unigene0004710	chr5	25122479	25123919
Unigene0004710	chr5	25274421	25275860
Unigene0006726	chr5	25285865	25295379
Unigene0007285	chr5	25546412	25546810
Unigene0002594	chr5	25712279	25717811
Unigene0002595	chr5	25712279	25717811
Unigene0021775	chr5	25800783	25804221
Unigene0021779	chr5	25800783	25806888
Unigene0021780	chr5	25800783	25806888
Unigene0021777	chr5	25804490	25806888
Unigene0021778	chr5	25804490	25806888
Unigene0047708	chr5	25820428	25823153
Unigene0070603	chr5	25830389	25830618
Unigene0082415	chr5	25870356	25875949
Unigene0087017	chr5	25870356	25875949
Unigene0045505	chr5	25902289	25903150
Unigene0043883	chr5	25903127	25907835
Unigene0040180	chr5	26011249	26022763
Unigene0040180	chr5	26022219	26022736
Unigene0041982	chr5	26110399	26113448
Unigene0058293	chr5	26111988	26112165
Unigene0002300	chr5	26124580	26125902
Unigene0002301	chr5	26124580	26127650
Unigene0027049	chr5	26144481	26146820
Unigene0008952	chr5	26156217	26160302
Unigene0016744	chr5	26161833	26166205
Unigene0082546	chr5	26168298	26174173
Unigene0067289	chr5	26287451	26287666
Unigene0020234	chr5	26397151	26409078
Unigene0020229	chr5	26397152	26409078
Unigene0020227	chr5	26398130	26409078
Unigene0020231	chr5	26398130	26409078
Unigene0007197	chr5	26454777	26459116
Unigene0002642	chr5	26526466	26526974
Unigene0042306	chr5	26556751	26559914
Unigene0053939	chr5	26579919	26580289
Unigene0045762	chr5	26587149	26589481
Unigene0067263	chr5	26593497	26594514
Unigene0042137	chr5	26743781	26753616
Unigene0024338	chr5	26793576	26804512
Unigene0024339	chr5	26793576	26804512
Unigene0024340	chr5	26793576	26804512
Unigene0024341	chr5	26793576	26804512
Unigene0024342	chr5	26793576	26804512
Unigene0024343	chr5	26793576	26804512
Unigene0024344	chr5	26793576	26804512
Unigene0024345	chr5	26793576	26804512
Unigene0024346	chr5	26793576	26804512
Unigene0024347	chr5	26793576	26804512
Unigene0024348	chr5	26793576	26804512
Unigene0024349	chr5	26793576	26804512
Unigene0024350	chr5	26793576	26804512
Unigene0024351	chr5	26793576	26804512
Unigene0024352	chr5	26793576	26804512
Unigene0024353	chr5	26793576	26804512
Unigene0011409	chr5	26843345	26851713
Unigene0047264	chr5	26988859	26990929
Unigene0003928	chr5	27017119	27037713
Unigene0038186	chr5	27019483	27019640
Unigene0040772	chr5	27048054	27049794
Unigene0027394	chr5	27066665	27069428
Unigene0048429	chr5	27132470	27137932
Unigene0049552	chr5	27139641	27143357
Unigene0081737	chr5	27143340	27145238
Unigene0014145	chr5	27147398	27148228
Unigene0050992	chr5	27147822	27148690
Unigene0006810	chr5	27148668	27149808
Unigene0006811	chr5	27148668	27152491
Unigene0031413	chr5	27176657	27193878
Unigene0044236	chr5	27178356	27178855
Unigene0019076	chr5	27199972	27206161
Unigene0019077	chr5	27199972	27203824
Unigene0019078	chr5	27199972	27203824
Unigene0019079	chr5	27199972	27206122
Unigene0081472	chr5	27199972	27206122
Unigene0081473	chr5	27199972	27206161
Unigene0041549	chr5	27340792	27349397
Unigene0005904	chr5	27373555	27383753
Unigene0041778	chr5	27473127	27473615
Unigene0045987	chr5	27477915	27478789
Unigene0044896	chr5	27495482	27495863
Unigene0045807	chr5	27495844	27496670
Unigene0067370	chr5	27526079	27526666
Unigene0083622	chr5	27596180	27599572
Unigene0086984	chr5	27596180	27599572
Unigene0047844	chr5	27604679	27609140
Unigene0050242	chr5	27732175	27732725
Unigene0014226	chr5	27740053	27754801
Unigene0014227	chr5	27740053	27754801
Unigene0008086	chr5	27982115	27987176
Unigene0046255	chr5	27992632	27999992
Unigene0009318	chr5	28042304	28047106
Unigene0083854	chr5	28066748	28076847
Unigene0086588	chr5	28066748	28076847
Unigene0034138	chr5	28088957	28089341
Unigene0034144	chr5	28088957	28089341
Unigene0035175	chr5	28092273	28094715
Unigene0034234	chr5	28133594	28134938
Unigene0060607	chr5	28170015	28170788
Unigene0046544	chr5	28176000	28178079
Unigene0005473	chr5	28291672	28293649
Unigene0047714	chr5	28295032	28295490
Unigene0052856	chr5	28300865	28307169
Unigene0079706	chr5	28372504	28372983
Unigene0042534	chr5	28434151	28436280
Unigene0082038	chr5	28439431	28450442
Unigene0047641	chr5	28534635	28542950
Unigene0082654	chr5	28564357	28564952
Unigene0022816	chr5	28592590	28594620
Unigene0022817	chr5	28592590	28594620
Unigene0021963	chr5	28614954	28618855
Unigene0025136	chr5	28781197	28794008
Unigene0025137	chr5	28781197	28794008
Unigene0025138	chr5	28781197	28794008
Unigene0025139	chr5	28781197	28794008
Unigene0025141	chr5	28781197	28794008
Unigene0084978	chr5	28781197	28794008
Unigene0084979	chr5	28781197	28794008
Unigene0084982	chr5	28781197	28794008
Unigene0025132	chr5	28785160	28794008
Unigene0025133	chr5	28785160	28794008
Unigene0025134	chr5	28785160	28794008
Unigene0025135	chr5	28785160	28794008
Unigene0025140	chr5	28785160	28794008
Unigene0084980	chr5	28785160	28794008
Unigene0084981	chr5	28785160	28794008
Unigene0084983	chr5	28785160	28794008
Unigene0051922	chr5	28796044	28799868
Unigene0065378	chr5	28936250	28936501
Unigene0046745	chr5	28941134	28942404
Unigene0051873	chr5	28943363	28945233
Unigene0047794	chr5	29040495	29044789
Unigene0051873	chr5	29046393	29048680
Unigene0051873	chr5	29049245	29051118
Unigene0014699	chr5	29254505	29260967
Unigene0014700	chr5	29254505	29256623
Unigene0079706	chr5	29309886	29310412
Unigene0073371	chr5	29310993	29311717
Unigene0040824	chr5	29399582	29400197
Unigene0041087	chr5	29515062	29515271
Unigene0082485	chr5	29563696	29569048
Unigene0047818	chr5	29593267	29596476
Unigene0046316	chr5	29596454	29598100
Unigene0020766	chr5	29598626	29599184
Unigene0047430	chr5	29633024	29633374
Unigene0035448	chr5	29634359	29639950
Unigene0048656	chr5	29635702	29636634
Unigene0031926	chr5	29811471	29813446
Unigene0031926	chr5	29830286	29832567
Unigene0048276	chr5	29844743	29848005
Unigene0002539	chr5	29847997	29849025
Unigene0005056	chr5	29922600	29926007
Unigene0005057	chr5	29922600	29926007
Unigene0007981	chr5	29979640	29981406
Unigene0006759	chr5	30027796	30032119
Unigene0012600	chr5	30537708	30537963
Unigene0042685	chr5	30631175	30637403
Unigene0046760	chr5	30661547	30677695
Unigene0062442	chr5	30674295	30674834
Unigene0083767	chr5	30715814	30719832
Unigene0085653	chr5	30715814	30719832
Unigene0020038	chr5	30722196	30723237
Unigene0009411	chr5	30737261	30745653
Unigene0009412	chr5	30742823	30745653
Unigene0017381	chr5	30925302	30926147
Unigene0060936	chr5	30945614	30946202
Unigene0051620	chr5	30952516	30954268
Unigene0020688	chr5	30969678	30981481
Unigene0020689	chr5	30969678	30976564
Unigene0020685	chr5	30970112	30976564
Unigene0020686	chr5	30970112	30976564
Unigene0020687	chr5	30970112	30981481
Unigene0020690	chr5	30970112	30981481
Unigene0050246	chr5	30995554	30995740
Unigene0022808	chr5	30996298	30996463
Unigene0044867	chr5	31005066	31007702
Unigene0012683	chr5	31014021	31014251
Unigene0012492	chr5	31014263	31014825
Unigene0008363	chr5	31014806	31015065
Unigene0054995	chr5	31025258	31025528
Unigene0042625	chr5	31115893	31116747
Unigene0042949	chr5	31116734	31119145
Unigene0005658	chr5	31121491	31127145
Unigene0042174	chr5	31152872	31157349
Unigene0042582	chr5	31170646	31172998
Unigene0072988	chr5	31190579	31190921
Unigene0044931	chr5	31220087	31223439
Unigene0016751	chr5	31322762	31346736
Unigene0016752	chr5	31322762	31346736
Unigene0016753	chr5	31322762	31346736
Unigene0083316	chr5	31322762	31346736
Unigene0084582	chr5	31322762	31346736
Unigene0085958	chr5	31322762	31346736
Unigene0016751	chr5	31322837	31333652
Unigene0016752	chr5	31322837	31333652
Unigene0016753	chr5	31322837	31333652
Unigene0083316	chr5	31322837	31333652
Unigene0084582	chr5	31322837	31333652
Unigene0085958	chr5	31322837	31333652
Unigene0016750	chr5	31343409	31346736
Unigene0016754	chr5	31343409	31346736
Unigene0044414	chr5	31350790	31360125
Unigene0041973	chr5	31408807	31412169
Unigene0061510	chr5	31440541	31441015
Unigene0004247	chr5	31441649	31448703
Unigene0043500	chr5	31491532	31493093
Unigene0044195	chr5	31493072	31493730
Unigene0010775	chr5	31499520	31500603
Unigene0017939	chr5	31676325	31679170
Unigene0004813	chr5	31686621	31690288
Unigene0018461	chr5	31774100	31779318
Unigene0073670	chr5	31802149	31803176
Unigene0004907	chr5	31807446	31813767
Unigene0004908	chr5	31807446	31813767
Unigene0044122	chr5	31824071	31827252
Unigene0024552	chr5	31848930	31856555
Unigene0024551	chr5	31849326	31856555
Unigene0084626	chr5	31867013	31868462
Unigene0038809	chr5	31876027	31880796
Unigene0031047	chr5	31882554	31890978
Unigene0031048	chr5	31882554	31890978
Unigene0031049	chr5	31882554	31890978
Unigene0031050	chr5	31882554	31890978
Unigene0031051	chr5	31882554	31890978
Unigene0031052	chr5	31882554	31890978
Unigene0031054	chr5	31882554	31890978
Unigene0031056	chr5	31882554	31889086
Unigene0031057	chr5	31882554	31890978
Unigene0031059	chr5	31882554	31890978
Unigene0031060	chr5	31882554	31890978
Unigene0031064	chr5	31882554	31889086
Unigene0031069	chr5	31882554	31890978
Unigene0031071	chr5	31882554	31890978
Unigene0031074	chr5	31882554	31890978
Unigene0031075	chr5	31882554	31889086
Unigene0031076	chr5	31882554	31890978
Unigene0031078	chr5	31882554	31890978
Unigene0031083	chr5	31882554	31890978
Unigene0031085	chr5	31882554	31890978
Unigene0031086	chr5	31882554	31889086
Unigene0031087	chr5	31882554	31890978
Unigene0031088	chr5	31882554	31890978
Unigene0031090	chr5	31882554	31890978
Unigene0081464	chr5	31882554	31890978
Unigene0083785	chr5	31882554	31890978
Unigene0085061	chr5	31882554	31890978
Unigene0085755	chr5	31882554	31890978
Unigene0031046	chr5	31884061	31890978
Unigene0031062	chr5	31884061	31890978
Unigene0031063	chr5	31884061	31889086
Unigene0031067	chr5	31884061	31890978
Unigene0031070	chr5	31884061	31889086
Unigene0031072	chr5	31884061	31890978
Unigene0031081	chr5	31884061	31890978
Unigene0031084	chr5	31884061	31890978
Unigene0031091	chr5	31884061	31886920
Unigene0031058	chr5	31888423	31890978
Unigene0031061	chr5	31888423	31890978
Unigene0031068	chr5	31888423	31890978
Unigene0031077	chr5	31888423	31890978
Unigene0031079	chr5	31888423	31890978
Unigene0031089	chr5	31888423	31890978
Unigene0028635	chr5	31896360	31897092
Unigene0039459	chr5	31921724	31923671
Unigene0084359	chr5	31924604	31928072
Unigene0086465	chr5	31924604	31925216
Unigene0079385	chr5	31935388	31935666
Unigene0069023	chr5	31936276	31936561
Unigene0017530	chr5	31937676	31944085
Unigene0017531	chr5	31937676	31944085
Unigene0085302	chr5	31937676	31944085
Unigene0067299	chr5	32090378	32091119
Unigene0022452	chr5	32096550	32100683
Unigene0022453	chr5	32096550	32100683
Unigene0043254	chr5	32122763	32131642
Unigene0046923	chr5	32151804	32157726
Unigene0060333	chr5	32152128	32152374
Unigene0036621	chr5	32193926	32194666
Unigene0036620	chr5	32195189	32197822
Unigene0036618	chr5	32198677	32204408
Unigene0012407	chr5	32237087	32243904
Unigene0012405	chr5	32240643	32243904
Unigene0003837	chr5	32328106	32328333
Unigene0044245	chr5	32349374	32354234
Unigene0023908	chr5	32378993	32380083
Unigene0023909	chr5	32378993	32381543
Unigene0071275	chr5	32378998	32379484
Unigene0036073	chr5	32415241	32417449
Unigene0070570	chr5	32427331	32428124
Unigene0043687	chr5	32454886	32460385
Unigene0037459	chr5	32662109	32671065
Unigene0043821	chr5	32951743	32955983
Unigene0006982	chr5	33055054	33056973
Unigene0072837	chr5	33063639	33063850
Unigene0043917	chr5	33078677	33086873
Unigene0041240	chr5	33088597	33091367
Unigene0012236	chr5	33100991	33109176
Unigene0083553	chr5	33107289	33109176
Unigene0050186	chr5	33138544	33139972
Unigene0043260	chr5	33141693	33146903
Unigene0085863	chr5	33148779	33150137
Unigene0066717	chr5	33164564	33165421
Unigene0059849	chr5	33171605	33172037
Unigene0083591	chr5	33172058	33173097
Unigene0082258	chr5	33173936	33184351
Unigene0068947	chr5	33188443	33189070
Unigene0005740	chr5	33353940	33356629
Unigene0005741	chr5	33353940	33356629
Unigene0041827	chr5	33423576	33423915
Unigene0049026	chr5	33499696	33501015
Unigene0048831	chr5	33500968	33501454
Unigene0005221	chr5	33501433	33505508
Unigene0048086	chr5	33505552	33506120
Unigene0047531	chr5	33506360	33507974
Unigene0005600	chr5	33561823	33562208
Unigene0009746	chr5	33570552	33575040
Unigene0024502	chr5	33642725	33649680
Unigene0045636	chr5	33675991	33677461
Unigene0023945	chr5	33723908	33727980
Unigene0023946	chr5	33723908	33728750
Unigene0023949	chr5	33723908	33728750
Unigene0023954	chr5	33723908	33727980
Unigene0023952	chr5	33727983	33728750
Unigene0003383	chr5	33730245	33734513
Unigene0028941	chr5	33784196	33786812
Unigene0081949	chr5	33787315	33792645
Unigene0024472	chr5	33794135	33798384
Unigene0072208	chr5	33796378	33796559
Unigene0025159	chr5	33963021	33967870
Unigene0025161	chr5	33963021	33966810
Unigene0025162	chr5	33963021	33967870
Unigene0008963	chr5	34022093	34026274
Unigene0046070	chr5	34077586	34079925
Unigene0018242	chr5	34103240	34107323
Unigene0018244	chr5	34103240	34109081
Unigene0018245	chr5	34103240	34109039
Unigene0041220	chr5	34115841	34119012
Unigene0036180	chr5	34162121	34162567
Unigene0038972	chr5	34164219	34168596
Unigene0038976	chr5	34164219	34168739
Unigene0038965	chr5	34164268	34168739
Unigene0045309	chr5	34186762	34188245
Unigene0005074	chr5	34239612	34244235
Unigene0046549	chr5	34309414	34310446
Unigene0047170	chr5	34310547	34312450
Unigene0043540	chr5	34312466	34314794
Unigene0043366	chr5	34342606	34346726
Unigene0044817	chr5	34460704	34468355
Unigene0036366	chr5	34485588	34487593
Unigene0036368	chr5	34485816	34487593
Unigene0036365	chr5	34488173	34490166
Unigene0059242	chr5	34488226	34488433
Unigene0036370	chr5	34489089	34490962
Unigene0053393	chr5	34496368	34499336
Unigene0047174	chr5	34514200	34524788
Unigene0045646	chr5	34536784	34537204
Unigene0008635	chr5	34560405	34565202
Unigene0008636	chr5	34560405	34565202
Unigene0035810	chr5	34644604	34644973
Unigene0082802	chr5	34646192	34654926
Unigene0017486	chr5	34679021	34679710
Unigene0038904	chr5	34680817	34704812
Unigene0038903	chr5	34685718	34704812
Unigene0038916	chr5	34704843	34707978
Unigene0038816	chr5	34719141	34732526
Unigene0038817	chr5	34720018	34732526
Unigene0044617	chr5	34726430	34726973
Unigene0050927	chr5	34796771	34797460
Unigene0002959	chr5	34867024	34870461
Unigene0002960	chr5	34867024	34870461
Unigene0004460	chr5	34927834	34930268
Unigene0004461	chr5	34927834	34931079
Unigene0052198	chr5	35097002	35097790
Unigene0049892	chr5	35115126	35115772
Unigene0003551	chr5	35117453	35118447
Unigene0011970	chr5	35145116	35147606
Unigene0011971	chr5	35145116	35147606
Unigene0011972	chr5	35145116	35147606
Unigene0011973	chr5	35145116	35147606
Unigene0045922	chr5	35197594	35199191
Unigene0031875	chr5	35250124	35250991
Unigene0031873	chr5	35251079	35254994
Unigene0034677	chr5	35267253	35269212
Unigene0079351	chr5	35288989	35289260
Unigene0045695	chr5	35532617	35536544
Unigene0047946	chr5	35587462	35588936
Unigene0015360	chr5	35599015	35607452
Unigene0015361	chr5	35599015	35607452
Unigene0015362	chr5	35599015	35607136
Unigene0015363	chr5	35599015	35607136
Unigene0041553	chr5	35624066	35627738
Unigene0040211	chr5	35633058	35633908
Unigene0040210	chr5	35634020	35635252
Unigene0038171	chr5	35760974	35762210
Unigene0038177	chr5	35760974	35765512
Unigene0045216	chr5	35784454	35795372
Unigene0075362	chr5	35791003	35791186
Unigene0003270	chr5	35826001	35826199
Unigene0050937	chr5	35829539	35829754
Unigene0084311	chr5	35859089	35860854
Unigene0086265	chr5	35859089	35860854
Unigene0048489	chr5	35860670	35861055
Unigene0057198	chr5	35871806	35872247
Unigene0057198	chr5	35881809	35882430
Unigene0008592	chr5	35898252	35900428
Unigene0008235	chr5	35915642	35918588
Unigene0004372	chr5	36028976	36032638
Unigene0004373	chr5	36028976	36032638
Unigene0048222	chr5	36085055	36088603
Unigene0002848	chr5	36088729	36089381
Unigene0013583	chr5	36103510	36105075
Unigene0001348	chr5	36105929	36106934
Unigene0020535	chr5	36106912	36107211
Unigene0081447	chr5	36106912	36108168
Unigene0081448	chr5	36106912	36108168
Unigene0008145	chr5	36109209	36110706
Unigene0072399	chr5	36224720	36225070
Unigene0084948	chr5	36226339	36305332
Unigene0084948	chr5	36298194	36305263
Unigene0046402	chr5	36310535	36315446
Unigene0010164	chr5	36405455	36412187
Unigene0010165	chr5	36405455	36412187
Unigene0026495	chr5	36445683	36447993
Unigene0026497	chr5	36445728	36447993
Unigene0026498	chr5	36445728	36465450
Unigene0068532	chr5	36454114	36454405
Unigene0012758	chr5	36675409	36817134
Unigene0012759	chr5	36675409	36817134
Unigene0012757	chr5	36678558	36817134
Unigene0051117	chr5	36847340	36848409
Unigene0051894	chr5	36848391	36848674
Unigene0013162	chr5	36848690	36849595
Unigene0013163	chr5	36865819	36866185
Unigene0016868	chr5	36894675	36903610
Unigene0016870	chr5	36894675	36902169
Unigene0035804	chr5	36905779	36906248
Unigene0043636	chr5	36917714	36921635
Unigene0041912	chr5	36942019	36950983
Unigene0009402	chr5	36976733	36984023
Unigene0019821	chr5	36985846	36986089
Unigene0019820	chr5	36986183	36986661
Unigene0049284	chr5	37016576	37019030
Unigene0004842	chr5	37033945	37038630
Unigene0041637	chr5	37090771	37094407
Unigene0035141	chr5	37195549	37199734
Unigene0072240	chr5	37220130	37220684
Unigene0007781	chr5	37246126	37250011
Unigene0007782	chr5	37246126	37251632
Unigene0057370	chr5	37272356	37273000
Unigene0052438	chr5	37272992	37274711
Unigene0037019	chr5	37278096	37281101
Unigene0005926	chr5	37290803	37294902
Unigene0076473	chr5	37297623	37297870
Unigene0012336	chr5	37305518	37309771
Unigene0057464	chr5	37337096	37337723
Unigene0081063	chr5	37349132	37349258
Unigene0003448	chr5	37391061	37391437
Unigene0007707	chr5	37474300	37475528
Unigene0032479	chr5	37476783	37478771
Unigene0032480	chr5	37476783	37478771
Unigene0032482	chr5	37476783	37478771
Unigene0032485	chr5	37476783	37478771
Unigene0032484	chr5	37478114	37478771
Unigene0032478	chr5	37478300	37478771
Unigene0032483	chr5	37478526	37478771
Unigene0014560	chr5	37490139	37495079
Unigene0014561	chr5	37490139	37495079
Unigene0004648	chr5	37549079	37554208
Unigene0022964	chr5	37608317	37638901
Unigene0051607	chr5	37677211	37677863
Unigene0043466	chr5	37687059	37690358
Unigene0016915	chr5	37713278	37713559
Unigene0046640	chr5	37731282	37732637
Unigene0046808	chr5	37733501	37742554
Unigene0045941	chr5	37735334	37735660
Unigene0018223	chr5	37756401	37761680
Unigene0074681	chr5	37762730	37762909
Unigene0085162	chr5	37769273	37771465
Unigene0078665	chr5	37772174	37772387
Unigene0085162	chr5	37824939	37826462
Unigene0005205	chr5	37839467	37850553
Unigene0020173	chr5	37872826	37879621
Unigene0020171	chr5	37872882	37879621
Unigene0050224	chr5	38041300	38043360
Unigene0016031	chr5	38065944	38075497
Unigene0063207	chr5	38069943	38070253
Unigene0004052	chr5	38089093	38094970
Unigene0004053	chr5	38089093	38094580
Unigene0045987	chr5	38148665	38149494
Unigene0040647	chr5	38159452	38179954
Unigene0040657	chr5	38159452	38179954
Unigene0040666	chr5	38159452	38179954
Unigene0040669	chr5	38159452	38179954
Unigene0040675	chr5	38159452	38182107
Unigene0040676	chr5	38159452	38179954
Unigene0040678	chr5	38159452	38182107
Unigene0040679	chr5	38159452	38179954
Unigene0081378	chr5	38159452	38179954
Unigene0081559	chr5	38159452	38182107
Unigene0084986	chr5	38159452	38179954
Unigene0040656	chr5	38159453	38182107
Unigene0040683	chr5	38161077	38182107
Unigene0040643	chr5	38162903	38182107
Unigene0040677	chr5	38162903	38182107
Unigene0040680	chr5	38162903	38182107
Unigene0040663	chr5	38162940	38182107
Unigene0040665	chr5	38162940	38182107
Unigene0040674	chr5	38162940	38182107
Unigene0002164	chr5	38185949	38187189
Unigene0002165	chr5	38185949	38186471
Unigene0021974	chr5	38215851	38221249
Unigene0021975	chr5	38215851	38221249
Unigene0081652	chr5	38215851	38221249
Unigene0083358	chr5	38215851	38221249
Unigene0050224	chr5	38260076	38262198
Unigene0043663	chr5	38279668	38284578
Unigene0011919	chr5	38331459	38332113
Unigene0086908	chr5	38331459	38332113
Unigene0032529	chr5	38335379	38338197
Unigene0012094	chr5	38346689	38353723
Unigene0010216	chr5	38399149	38402708
Unigene0010217	chr5	38399149	38400498
Unigene0034218	chr5	38437254	38448395
Unigene0047923	chr5	38468196	38468884
Unigene0043515	chr5	38606711	38612302
Unigene0017687	chr5	38622109	38634958
Unigene0031237	chr5	38637985	38638396
Unigene0006957	chr5	38656296	38666125
Unigene0034286	chr5	38668855	38671196
Unigene0008249	chr5	38700520	38701833
Unigene0016993	chr5	38710719	38713599
Unigene0016998	chr5	38710721	38713599
Unigene0012718	chr5	38728247	38733862
Unigene0012719	chr5	38728412	38733862
Unigene0012717	chr5	38728416	38733862
Unigene0059714	chr5	38756182	38756499
Unigene0017371	chr5	38787536	38791451
Unigene0014010	chr5	38920574	38921815
Unigene0047387	chr5	38952403	38954088
Unigene0045286	chr5	38954743	38958016
Unigene0045155	chr5	38966399	38967290
Unigene0049013	chr5	39023277	39024667
Unigene0052278	chr5	39053346	39055883
Unigene0050822	chr5	39150990	39153735
Unigene0021714	chr5	39174298	39180376
Unigene0053564	chr5	39185609	39186371
Unigene0031448	chr5	39193976	39194916
Unigene0046914	chr5	39198692	39203601
Unigene0019375	chr5	39203937	39204428
Unigene0012343	chr5	39204273	39205304
Unigene0024426	chr5	39205318	39206070
Unigene0024425	chr5	39206075	39206385
Unigene0050173	chr5	39221267	39226607
Unigene0047629	chr5	39296200	39298034
Unigene0012794	chr5	39383061	39389150
Unigene0016352	chr5	39410062	39411522
Unigene0017723	chr5	39446995	39449730
Unigene0017724	chr5	39446995	39449799
Unigene0019240	chr5	39453202	39454507
Unigene0008559	chr5	39458216	39461718
Unigene0008560	chr5	39458216	39461892
Unigene0066547	chr5	39492864	39493168
Unigene0057650	chr5	39494435	39496390
Unigene0015073	chr5	39511446	39516034
Unigene0032138	chr5	39551394	39554138
Unigene0032141	chr5	39551394	39555777
Unigene0032137	chr5	39553249	39554138
Unigene0032140	chr5	39553249	39555777
Unigene0022201	chr5	39589885	39591591
Unigene0030713	chr5	39599789	39605910
Unigene0030714	chr5	39599789	39609350
Unigene0086410	chr5	39599789	39617003
Unigene0086413	chr5	39599789	39617003
Unigene0086414	chr5	39599789	39617003
Unigene0086415	chr5	39599789	39617003
Unigene0086411	chr5	39611512	39617003
Unigene0086412	chr5	39611512	39617003
Unigene0086416	chr5	39613726	39617003
Unigene0086417	chr5	39613726	39617003
Unigene0084831	chr5	39657401	39665163
Unigene0087005	chr5	39657401	39665163
Unigene0041425	chr5	39691637	39698776
Unigene0007991	chr5	39704627	39704968
Unigene0007992	chr5	39704627	39705391
Unigene0007991	chr5	39717143	39717484
Unigene0039737	chr5	39730329	39733574
Unigene0051619	chr5	39732009	39732285
Unigene0023565	chr5	39809348	39813138
Unigene0023566	chr5	39809348	39813138
Unigene0023569	chr5	39809348	39813138
Unigene0023570	chr5	39809348	39813138
Unigene0023571	chr5	39809348	39813138
Unigene0023572	chr5	39809348	39813138
Unigene0023574	chr5	39809348	39813138
Unigene0023575	chr5	39809348	39813138
Unigene0023577	chr5	39809348	39813138
Unigene0023578	chr5	39809348	39813138
Unigene0023567	chr5	39811870	39813138
Unigene0023568	chr5	39811870	39813138
Unigene0023573	chr5	39811870	39813138
Unigene0023576	chr5	39811870	39813138
Unigene0023579	chr5	39811870	39813138
Unigene0037444	chr5	39813103	39814797
Unigene0044291	chr5	39814774	39815497
Unigene0044440	chr5	39817259	39820904
Unigene0044090	chr5	39822012	39826467
Unigene0004982	chr5	39833732	39840004
Unigene0008190	chr5	39879529	39883407
Unigene0044301	chr5	39883389	39884994
Unigene0041728	chr5	39943741	39946936
Unigene0045046	chr5	39953269	39954050
Unigene0034404	chr5	39980400	39988140
Unigene0034407	chr5	39980400	39988140
Unigene0008486	chr5	40010367	40014538
Unigene0008485	chr5	40013617	40014538
Unigene0053730	chr5	40014517	40014786
Unigene0046303	chr5	40015972	40020285
Unigene0007952	chr5	40066189	40072013
Unigene0047772	chr5	40066628	40067513
Unigene0005747	chr5	40089752	40094917
Unigene0051426	chr5	40127636	40130177
Unigene0043292	chr5	40165021	40170688
Unigene0051992	chr5	40205510	40207948
Unigene0045987	chr5	40223149	40224032
Unigene0043602	chr5	40356970	40364983
Unigene0055448	chr5	40362487	40362819
Unigene0082060	chr5	40395858	40398517
Unigene0082060	chr5	40408945	40411743
Unigene0071859	chr5	40501723	40502044
Unigene0021605	chr5	40536419	40539506
Unigene0021606	chr5	40536419	40539506
Unigene0021607	chr5	40536419	40539506
Unigene0083216	chr5	40536419	40539506
Unigene0003009	chr5	40770172	40772133
Unigene0003010	chr5	40770172	40772133
Unigene0047123	chr5	40780223	40783631
Unigene0011905	chr5	40789775	40791604
Unigene0010365	chr5	40843692	40844819
Unigene0039078	chr5	40854680	40856486
Unigene0039079	chr5	40857116	40859448
Unigene0071580	chr5	40894998	40895195
Unigene0010218	chr5	40936969	40942766
Unigene0010219	chr5	40936969	40942766
Unigene0010220	chr5	40936969	40942766
Unigene0010221	chr5	40936969	40942766
Unigene0047402	chr5	40951950	40955006
Unigene0042632	chr5	41046604	41049447
Unigene0051865	chr5	41062543	41063195
Unigene0051037	chr5	41074619	41075458
Unigene0054422	chr5	41075648	41077238
Unigene0044124	chr5	41106162	41106528
Unigene0020615	chr5	41121521	41124095
Unigene0065959	chr5	41122560	41123091
Unigene0018560	chr5	41126829	41128129
Unigene0042286	chr5	41127809	41139716
Unigene0018560	chr5	41137470	41138797
Unigene0024157	chr5	41149363	41152639
Unigene0082857	chr5	41184568	41189148
Unigene0086843	chr5	41184568	41189148
Unigene0015089	chr5	41236287	41237868
Unigene0047607	chr5	41236665	41237638
Unigene0047396	chr5	41237616	41240062
Unigene0085882	chr5	41239049	41242660
Unigene0086584	chr5	41239049	41242660
Unigene0049558	chr5	41309355	41313629
Unigene0046436	chr5	41316309	41320372
Unigene0083419	chr5	41321819	41322985
Unigene0010398	chr5	41323238	41324083
Unigene0054017	chr5	41324065	41324485
Unigene0043934	chr5	41358503	41365287
Unigene0044104	chr5	41399838	41408870
Unigene0046385	chr5	41424378	41425665
Unigene0043780	chr5	41426790	41427839
Unigene0048854	chr5	41509673	41509907
Unigene0084629	chr5	41528877	41531442
Unigene0042837	chr5	41534062	41538285
Unigene0083899	chr5	41542790	41552430
Unigene0035643	chr5	41563126	41564676
Unigene0081311	chr5	41568349	41568580
Unigene0028625	chr5	41583405	41588491
Unigene0028629	chr5	41583405	41584607
Unigene0042250	chr5	41606760	41610776
Unigene0078505	chr5	41661789	41662051
Unigene0045957	chr5	41662135	41664131
Unigene0047942	chr5	41686107	41688265
Unigene0003875	chr5	41711262	41715966
Unigene0003876	chr5	41711262	41715966
Unigene0054621	chr5	41771546	41771956
Unigene0043086	chr5	41806588	41811024
Unigene0015354	chr5	41828606	41834848
Unigene0080008	chr5	41836362	41836672
Unigene0080008	chr5	41845493	41845803
Unigene0080008	chr5	41851104	41851414
Unigene0004871	chr5	41927325	41933879
Unigene0004872	chr5	41927325	41933879
Unigene0011035	chr5	41944806	41948488
Unigene0011036	chr5	41944806	41948488
Unigene0041687	chr5	42007502	42013162
Unigene0050385	chr5	42123117	42123836
Unigene0049004	chr5	42153341	42154060
Unigene0008024	chr5	42163050	42170469
Unigene0051068	chr5	42176001	42177618
Unigene0050001	chr5	42177597	42178921
Unigene0043682	chr5	42180083	42180659
Unigene0043249	chr5	42180664	42180891
Unigene0043293	chr5	42224691	42227474
Unigene0042814	chr5	42229050	42234444
Unigene0083116	chr5	42250758	42272412
Unigene0042090	chr5	42274886	42276234
Unigene0044984	chr5	42292267	42299791
Unigene0051014	chr5	42324738	42325683
Unigene0050704	chr5	42325660	42327829
Unigene0046230	chr5	42332553	42337581
Unigene0027072	chr5	42377092	42397800
Unigene0027073	chr5	42377092	42397800
Unigene0064487	chr5	42381922	42382123
Unigene0058252	chr5	42382710	42382888
Unigene0042186	chr5	42441414	42442004
Unigene0044032	chr5	42463713	42471052
Unigene0042197	chr5	42487883	42493005
Unigene0045438	chr5	42503216	42508736
Unigene0045871	chr5	42512654	42526760
Unigene0071733	chr5	42515271	42515393
Unigene0011200	chr5	42526740	42531019
Unigene0022664	chr5	42532746	42539765
Unigene0022665	chr5	42532746	42539765
Unigene0022663	chr5	42537781	42539765
Unigene0022663	chr5	42611136	42613160
Unigene0022664	chr5	42611136	42618194
Unigene0022665	chr5	42611136	42618194
Unigene0011200	chr5	42619922	42624201

## Sheet: 6
Unigene0038714	chr6	161683	177476
Unigene0038716	chr6	161683	177476
Unigene0038717	chr6	161683	177476
Unigene0038718	chr6	161683	177476
Unigene0038719	chr6	161683	177476
Unigene0038720	chr6	161683	177476
Unigene0038721	chr6	161683	177476
Unigene0038723	chr6	161683	177476
Unigene0038712	chr6	169177	177476
Unigene0038713	chr6	169177	177476
Unigene0038715	chr6	169177	177476
Unigene0038722	chr6	169177	177476
Unigene0017276	chr6	251676	257347
Unigene0017277	chr6	251676	256967
Unigene0017278	chr6	251676	257347
Unigene0037854	chr6	356564	364689
Unigene0043669	chr6	369425	373878
Unigene0006735	chr6	373860	376310
Unigene0061078	chr6	398650	398841
Unigene0064545	chr6	398848	398991
Unigene0043049	chr6	410966	415622
Unigene0028161	chr6	417728	419056
Unigene0028160	chr6	419083	421091
Unigene0082845	chr6	420231	420790
Unigene0003797	chr6	448216	454570
Unigene0003798	chr6	448216	454570
Unigene0076154	chr6	475057	475235
Unigene0003797	chr6	479641	484725
Unigene0003798	chr6	479641	484725
Unigene0042853	chr6	534020	538377
Unigene0026784	chr6	539117	541149
Unigene0026783	chr6	541102	541465
Unigene0010773	chr6	552537	553260
Unigene0010771	chr6	552642	553260
Unigene0033340	chr6	573791	578438
Unigene0026784	chr6	705551	707575
Unigene0042853	chr6	708279	712860
Unigene0039062	chr6	936703	942297
Unigene0039070	chr6	936703	942297
Unigene0039073	chr6	936703	942297
Unigene0039074	chr6	936703	942297
Unigene0042584	chr6	1048283	1049363
Unigene0004400	chr6	1051164	1052415
Unigene0005428	chr6	1081282	1087782
Unigene0018196	chr6	1088862	1096100
Unigene0048981	chr6	1300539	1303002
Unigene0030072	chr6	1510095	1510650
Unigene0035692	chr6	1520083	1521768
Unigene0035668	chr6	1522009	1522342
Unigene0037445	chr6	1653765	1653933
Unigene0082464	chr6	1655507	1662176
Unigene0083772	chr6	1865748	1869272
Unigene0085580	chr6	1865748	1870215
Unigene0008787	chr6	1920750	1932648
Unigene0011734	chr6	1928934	1929436
Unigene0011735	chr6	1929217	1929436
Unigene0007654	chr6	1935197	1941585
Unigene0007655	chr6	1935197	1941585
Unigene0044866	chr6	1943011	1950966
Unigene0007908	chr6	2007502	2016938
Unigene0007909	chr6	2007502	2016938
Unigene0008787	chr6	2048979	2077702
Unigene0008787	chr6	2049311	2050122
[truncated: 393 more rows]

## Sheet: 7
Unigene0041818	chr7	270087	275477
[truncated: 1,602 more rows]

[truncated: 1 more sheets: 8]
