# Supplementary material for: High-Throughput RNA-Seq Data Analysis of the Single Nucleotide Polymorphisms (SNPs) and Zygomorphic Flower Development in Pea (Pisum sativum L.)
Source: Int J Mol Sci. 2017 Dec 20;18(12):2710. doi: 10.3390/ijms18122710 (PMC5751311; doi:10.3390/ijms18122710)
Supplement: Supplementary file 1 [file ijms-18-02710-s001.zip › Table S5.xlsx]

## Sheet: sheet1
Query id	Subject id	Marker accession number in this study	Linkage Group	cM Genetic Distance	Mt Chr	Start	End
Ps001271	Unigene0042197	PsMk1-2	LGI	0	chr5	42487883	42493005
Ps001282	Unigene0044984	PsMk1-4	LGI	1.1	chr5	42292267	42299791
Ps001529	Unigene0042250	PsMk1-11	LGI	3.2	chr5	41606760	41610776
Ps001212	Unigene0044104	PsMk1-10	LGI	3.2	chr5	41399838	41408870
Ps001192	Unigene0010365	PsMk1-14	LGI	5.3	chr5	40843692	40844819
Ps001381	Unigene0003010	PsMk1-19	LGI	5.6	chr5	40770172	40772133
Ps001397	Unigene0007952	PsMk1-22	LGI	6.9	chr5	40066189	40072013
Ps001466	Unigene0039737	PsMk1-26	LGI	8.4	chr5	39730329	39733574
Ps001318	Unigene0086415	PsMk1-24	LGI	8.4	chr5	39599789	39617003
Ps001310	Unigene0047629	PsMk1-27	LGI	8.8	chr5	39296200	39298034
Ps001268	Unigene0043466	PsMk1-40	LGI	21.5	chr5	37687059	37690358
Ps001154	Unigene0007707	PsMk1-41	LGI	25.1	chr5	37474300	37475528
Ps001162	Unigene0008592	PsMk1-47	LGI	32.8	chr5	35898252	35900428
Ps001378	Unigene0004461	PsMk1-54	LGI	35.3	chr5	34927834	34931079
Ps001175	Unigene0038976	PsMk1-55	LGI	36.1	chr5	34164219	34168739
Ps001507	Unigene0009746	PsMk1-58	LGI	40	chr5	33570552	33575040
Ps001443	Unigene0043917	PsMk1-61	LGI	41.2	chr5	33078677	33086873
Ps001447	Unigene0024552	PsMk1-62	LGI	42.4	chr5	31848930	31856555
Ps001234	Unigene0043687	PsMk1-64	LGI	46.2	chr5	32454886	32460385
Ps001441	Unigene0041973	PsMk1-65	LGI	46.9	chr5	31408807	31412169
Ps001516	Unigene0044931	PsMk1-66	LGI	47.6	chr5	31220087	31223439
Ps001530	Unigene0031926	PsMk1-70	LGI	54.2	chr5	29830286	29832567
Ps001361	Unigene0051873	PsMk1-75	LGI	58.9	chr5	29046393	29048680
Ps001252	Unigene0042534	PsMk1-80	LGI	61.2	chr5	28434151	28436280
Ps001233	Unigene0045807	PsMk1-79	LGI	61.2	chr5	27495844	27496670
Ps001298	Unigene0041549	PsMk1-83	LGI	61.6	chr5	27340792	27349397
Ps001738	Unigene0040180	PsMk1-85	LGI	64	chr5	26011249	26022763
Ps000419	Unigene0081594	PsMk1-87	LGI	67.1	chr5	24150124	24234187
Ps001113	Unigene0045295	PsMk1-99	LGI	76.6	chr5	15555324	15557791
Ps001185	Unigene0045633	PsMk1-100	LGI	83.9	chr5	18130938	18136662
Ps001166	Unigene0006766	PsMk1-104	LGI	92.7	chr5	16674513	16678010
Ps001434	Unigene0043365	PsMk1-107	LGI	92.7	chr5	16690741	16695672
Ps001239	Unigene0019424	PsMk1-108	LGI	95.5	chr5	18953422	18958246
Ps001371	Unigene0041565	PsMk1-110	LGI	95.5	chr5	18997999	19000683
Ps001258	Unigene0041679	PsMk1-109	LGI	95.5	chr5	18910163	18911939
Ps001248	Unigene0016730	PsMk1-111	LGI	96	chr5	19761331	19764011
Ps000800	Unigene0043776	PsMk1-116	LGI	102	chr5	12358975	12362135
Ps000927	Unigene0043019	PsMk1-118	LGI	103.4	chr5	11616595	11617779
Ps000994	Unigene0041537	PsMk1-119	LGI	104.2	chr5	11427308	11432379
Ps000803	Unigene0005850	PsMk1-120	LGI	105	chr5	11061178	11063913
Ps001064	Unigene0008676	PsMk1-122	LGI	105	chr5	10903425	10906999
Ps001068	Unigene0005548	PsMk1-128	LGI	110.8	chr5	10048400	10057351
Ps000920	Unigene0084353	PsMk1-135	LGI	112.9	chr5	8797434	8802089
Ps001100	Unigene0041531	PsMk1-138	LGI	114	chr5	8532066	8535617
Ps001110	Unigene0009231	PsMk1-140	LGI	114.9	chr5	8166972	8167417
Ps001099	Unigene0007171	PsMk1-143	LGI	128.7	chr5	5229011	5231447
Ps000823	Unigene0040199	PsMk1-144	LGI	134.4	chr5	1240531	1250486
Ps000827	Unigene0020770	PsMk1-145	LGI	141.8	chr5	2463506	2466258
Ps000855	Unigene0041760	PsMk1-149	LGI	142.4	chr5	1923801	1928624
Ps000858	Unigene0046208	PsMk1-150	LGI	142.4	chr5	1890606	1896638
Ps000971	Unigene0008813	PsMk1-152	LGI	144.9	chr5	864421	870210
Ps000154	Unigene0008903	PsMk2-1	LGII	0	chr3	41324413	41328873
Ps001793	Unigene0035436	PsMk2-8	LGII	0.6	chr1	8235746	8241037
Ps000083	Unigene0038502	PsMk2-20	LGII	6.1	chr1	5864655	5869514
Ps000040	Unigene0003781	PsMk2-26	LGII	11.2	chr1	4669991	4677478
Ps000355	Unigene0027276	PsMk2-35	LGII	23.6	chr1	1408102	1411403
Ps000236	Unigene0044550	PsMk2-34	LGII	23.6	chr1	1431313	1435877
Ps001755	Unigene0018269	PsMk2-47	LGII	48.8	chr8	21423727	21428342
Ps000352	Unigene0047103	PsMk2-54	LGII	75.7	chr1	17328468	17332634
Ps000331	Unigene0004679	PsMk2-65	LGII	112.7	chr1	13687401	13704844
Ps000193	Unigene0009648	PsMk2-75	LGII	159	chr1	26456305	26463202
Ps000042	Unigene0044665	PsMk2-80	LGII	162.5	chr1	27519317	27521384
Ps000185	Unigene0006011	PsMk2-83	LGII	162.7	chr1	27365007	27366847
Ps000054	Unigene0007039	PsMk2-82	LGII	162.7	chr8	14169469	14171440
Ps000072	Unigene0006107	PsMk2-91	LGII	171.3	chr1	28563585	28571587
Ps000014	Unigene0036434	PsMk2-90	LGII	171.3	chr1	28305933	28309022
Ps000163	Unigene0007830	PsMk2-98	LGII	175.2	chr1	29551026	29552692
Ps000272	Unigene0044575	PsMk2-103	LGII	179.9	chr1	30198899	30202342
Ps000373	Unigene0086734	PsMk2-104	LGII	179.9	chr1	30146059	30148288
Ps000104	Unigene0043734	PsMk2-116	LGII	190.7	chr1	31634774	31640192
Ps000746	Unigene0041999	PsMk2-134	LGII	214.9	chr5	23890866	23894896
Ps000143	Unigene0043522	PsMk2-132	LGII	214.9	chr1	33658559	33663729
Ps000251	Unigene0042882	PsMk2-135	LGII	216	chr1	33907220	33914922
Ps000742	Unigene0041205	PsMk3-4	LGIII	6.3	chr3	43020417	43022216
Ps000727	Unigene0011725	PsMk3-10	LGIII	7.1	chr3	42668098	42675491
Ps000719	Unigene0011460	PsMk3-13	LGIII	7.5	chr3	43039314	43041683
Ps000682	Unigene0008641	PsMk3-14	LGIII	8.5	chr3	42533015	42537581
Ps000637	Unigene0049890	PsMk3-18	LGIII	8.9	chr3	42391009	42392603
Ps000546	Unigene0012272	PsMk3-22	LGIII	10.4	chr3	41720653	41722215
Ps000473	Unigene0044127	PsMk3-27	LGIII	20.3	chr3	40281172	40285926
Ps000696	Unigene0045484	PsMk3-29	LGIII	20.3	chr3	40287339	40291560
Ps000545	Unigene0054740	PsMk3-28	LGIII	20.3	chr3	40011085	40011929
Ps000462	Unigene0004932	PsMk3-33	LGIII	27.7	chr3	39217259	39218724
Ps000620	Unigene0019402	PsMk3-43	LGIII	36.4	chr3	21689153	21692033
Ps000664	Unigene0012110	PsMk3-45	LGIII	54.6	chr3	34503652	34505499
Ps000476	Unigene0014743	PsMk3-46	LGIII	54.8	chr3	34646646	34651421
Ps000439	Unigene0044965	PsMk3-49	LGIII	56	chr3	34101464	34102879
Ps000302	Unigene0008001	PsMk3-51	LGIII	57.9	chr3	33521561	33527265
Ps000766	Unigene0082557	PsMk3-53	LGIII	58.1	chr3	33342420	33346079
Ps000593	Unigene0008414	PsMk3-55	LGIII	58.5	chr3	33271785	33274951
Ps000196	Unigene0045725	PsMk3-56	LGIII	58.7	chr3	33500175	33501452
Ps000767	Unigene0043982	PsMk3-60	LGIII	60.3	chr3	32714592	32721425
Ps000469	Unigene0041415	PsMk3-67	LGIII	71.5	chr3	31498396	31501104
Ps000748	Unigene0048582	PsMk3-69	LGIII	71.5	chr3	31570976	31571731
Ps000640	Unigene0037532	PsMk3-72	LGIII	72.5	chr3	31527929	31529797
Ps000675	Unigene0045453	PsMk3-73	LGIII	72.5	chr3	31485596	31485802
Ps000443	Unigene0046655	PsMk3-71	LGIII	72.5	chr3	31446199	31448606
Ps000755	Unigene0019388	PsMk3-77	LGIII	73.9	chr3	30854708	30858505
Ps000658	Unigene0042168	PsMk3-76	LGIII	73.9	chr3	30925515	30929954
Ps001549	Unigene0048987	PsMk3-78	LGIII	73.9	chr3	30923094	30923792
Ps000507	Unigene0026689	PsMk3-80	LGIII	92.6	chr3	26825605	26829898
Ps000524	Unigene0086779	PsMk3-82	LGIII	92.8	chr3	27026378	27029163
Ps000680	Unigene0003785	PsMk3-83	LGIII	92.9	chr3	26882949	26886150
Ps000573	Unigene0019706	PsMk3-86	LGIII	93	chr3	26806999	26812199
Ps000515	Unigene0020343	PsMk3-84	LGIII	93	chr3	26905841	26907532
Ps000480	Unigene0004605	PsMk3-87	LGIII	94	chr3	26567717	26570325
Ps000697	Unigene0017613	PsMk3-88	LGIII	94.8	chr3	26353830	26357568
Ps000398	Unigene0004645	PsMk3-89	LGIII	96.4	chr3	25480379	25484960
Ps000497	Unigene0005092	PsMk3-90	LGIII	96.4	chr3	25528612	25529515
Ps000520	Unigene0044880	PsMk3-91	LGIII	96.4	chr3	25674437	25680114
Ps000645	Unigene0042944	PsMk3-94	LGIII	97.5	chr3	25253885	25258358
Ps000705	Unigene0044857	PsMk3-97	LGIII	99.2	chr3	24580235	24582656
Ps000501	Unigene0044642	PsMk3-100	LGIII	100	chr3	24318646	24323051
Ps000597	Unigene0040466	PsMk3-101	LGIII	100.5	chr3	24196317	24197600
Ps000594	Unigene0004490	PsMk3-106	LGIII	110.2	chr3	22031316	22045657
Ps000763	Unigene0011615	PsMk3-110	LGIII	110.2	chr3	22129053	22134414
Ps000672	Unigene0038966	PsMk3-107	LGIII	110.2	chr3	22121651	22127188
Ps000560	Unigene0005260	PsMk3-119	LGIII	114.8	chr3	23890129	23894685
Ps000652	Unigene0009966	PsMk3-120	LGIII	115.1	chr3	23614847	23617464
Ps000536	Unigene0003948	PsMk3-125	LGIII	117.8	chr3	29781551	29795232
Ps000528	Unigene0002962	PsMk3-126	LGIII	120.1	chr3	19935151	19937229
Ps000610	Unigene0004196	PsMk3-127	LGIII	120.1	chr3	20164161	20184210
Ps000753	Unigene0028639	PsMk3-129	LGIII	120.1	chr3	20516163	20520557
Ps000538	Unigene0040465	PsMk3-130	LGIII	122.7	chr3	9633517	9682593
Ps000523	Unigene0012379	PsMk3-137	LGIII	132.3	chr3	18758515	18765359
Ps001803	Unigene0017902	PsMk3-139	LGIII	132.3	chr3	18716550	18717448
Ps000663	Unigene0046328	PsMk3-141	LGIII	135.4	chr3	17214797	17220319
Ps000505	Unigene0018444	PsMk3-152	LGIII	148	chr3	213713	215043
Ps000607	Unigene0042244	PsMk3-156	LGIII	153.3	chr3	2193935	2199603
Ps000351	Unigene0033444	PsMk3-164	LGIII	173	chr2	25631091	25645793
Ps000428	Unigene0013971	PsMk3-166	LGIII	175.5	chr2	26542382	26549124
Ps000745	Unigene0087126	PsMk3-167	LGIII	175.5	chr2	26558843	26560894
Ps000204	Unigene0004476	PsMk3-172	LGIII	180.2	chr2	27453379	27457950
Ps000287	Unigene0042458	PsMk3-173	LGIII	180.2	chr2	27431513	27432011
Ps000114	Unigene0042913	PsMk3-174	LGIII	180.7	chr2	27669988	27673676
Ps000470	Unigene0041240	PsMk3-177	LGIII	183.1	chr2	30620398	30623444
Ps000466	Unigene0043152	PsMk3-187	LGIII	187.7	chr2	29153275	29157971
Ps000604	Unigene0010921	PsMk3-201	LGIII	197.2	chr2	31707537	31710072
Ps000935	Unigene0042459	PsMk4-3	LGIV	0.7	chr5	44432	46097
Ps000815	Unigene0015806	PsMk4-5	LGIV	3	chr5	533779	538265
Ps001555	Unigene0041343	PsMk4-20	LGIV	10.6	chr8	2734888	2737380
Ps001574	Unigene0028632	PsMk4-27	LGIV	22.8	chr8	4102421	4104065
Ps001749	Unigene0013108	PsMk4-30	LGIV	25.9	chr8	5228469	5230194
Ps001591	Unigene0004362	PsMk4-33	LGIV	27.3	chr8	5440835	5444087
Ps001679	Unigene0042817	PsMk4-34	LGIV	27.3	chr8	5445694	5449116
Ps001674	Unigene0060233	PsMk4-35	LGIV	35.1	chr8	6488431	6488904
Ps000317	Unigene0049208	PsMk4-40	LGIV	42.5	chr7	10903717	10923743
Ps001903	Unigene0044671	PsMk4-41	LGIV	43.4	chr8	7021674	7024081
Ps001887	Unigene0083638	PsMk4-47	LGIV	51	chr8	8446370	8449976
Ps001541	Unigene0020889	PsMk4-48	LGIV	51.8	chr8	8783704	8791771
Ps001566	Unigene0044462	PsMk4-51	LGIV	52.2	chr8	8900954	8904625
Ps001547	Unigene0030108	PsMk4-54	LGIV	58.7	chr1	2483310	2492726
Ps001734	Unigene0046204	PsMk4-56	LGIV	58.7	chr8	10378243	10381393
Ps001621	Unigene0053966	PsMk4-62	LGIV	60.9	chr8	12126818	12138748
Ps001805	Unigene0006932	PsMk4-63	LGIV	61.1	chr8	11249736	11251396
Ps001742	Unigene0085891	PsMk4-82	LGIV	78.5	chr8	18278504	18281837
Ps001764	Unigene0003902	PsMk4-99	LGIV	105.9	chr4	34746253	34749333
Ps001648	Unigene0014804	PsMk4-97	LGIV	105.9	chr4	34531980	34535048
Ps001581	Unigene0043638	PsMk4-102	LGIV	106	chr4	34679527	34683033
Ps001746	Unigene0046072	PsMk4-105	LGIV	106.2	chr4	34847398	34853966
Ps001770	Unigene0042679	PsMk4-106	LGIV	107.4	chr4	35143790	35148516
Ps001822	Unigene0042000	PsMk4-107	LGIV	108.5	chr4	35154562	35159014
Ps001810	Unigene0010204	PsMk4-110	LGIV	109.1	chr4	35267005	35271484
Ps001827	Unigene0042717	PsMk4-111	LGIV	109.1	chr4	35226653	35229837
Ps001896	Unigene0009008	PsMk4-119	LGIV	112	chr3	28121845	28124260
Ps001818	Unigene0019016	PsMk4-118	LGIV	112	chr4	35831736	35834279
Ps001548	Unigene0041424	PsMk4-120	LGIV	113.6	chr4	36066048	36070506
Ps001553	Unigene0045811	PsMk4-138	LGIV	120	chr4	37506225	37509545
Ps001757	Unigene0042346	PsMk4-143	LGIV	123.2	chr4	38169106	38172200
Ps001725	Unigene0043722	PsMk4-144	LGIV	123.6	chr4	38335976	38340788
Ps001567	Unigene0004832	PsMk4-145	LGIV	126.7	chr4	39120719	39123471
Ps001828	Unigene0005507	PsMk4-147	LGIV	126.7	chr4	39040949	39046859
Ps001777	Unigene0010539	PsMk4-149	LGIV	127.4	chr4	39346780	39350641
Ps001895	Unigene0017110	PsMk4-150	LGIV	127.4	chr4	39208566	39212721
Ps001680	Unigene0041418	PsMk4-151	LGIV	127.9	chr4	39487293	39490050
Ps001907	Unigene0043611	PsMk4-153	LGIV	129.1	chr4	39686601	39696448
Ps001761	Unigene0045383	PsMk4-154	LGIV	129.7	chr4	40241264	40249060
Ps001877	Unigene0003982	PsMk4-161	LGIV	151	chr4	44472499	44477305
Ps001762	Unigene0043339	PsMk4-163	LGIV	154.4	chr4	44972662	44977392
Ps001690	Unigene0042958	PsMk4-165	LGIV	154.7	chr4	45108653	45114475
Ps001209	Unigene0005688	PsMk5-10	LGV	16.6	chr7	1775192	1779720
Ps001481	Unigene0049159	PsMk5-17	LGV	25.8	chr7	5302997	5355721
Ps001436	Unigene0037295	PsMk5-26	LGV	27.9	chr7	5837175	5839899
Ps001432	Unigene0044616	PsMk5-25	LGV	27.9	chr6	17823716	17831433
Ps001274	Unigene0044038	PsMk5-34	LGV	42.5	chr7	14547106	14556205
Ps000124	Unigene0046558	PsMk5-43	LGV	55.2	chr2	19937928	19942745
Ps001303	Unigene0008373	PsMk5-55	LGV	63.1	chr7	17900265	17905390
Ps001500	Unigene0042315	PsMk5-56	LGV	63.1	chr7	18029992	18030833
Ps001301	Unigene0044385	PsMk5-54	LGV	63.1	chr7	18027042	18028421
Ps001201	Unigene0009772	PsMk5-60	LGV	67.6	chr7	19747804	19752796
Ps001643	Unigene0044384	PsMk5-62	LGV	67.6	chr4	37872633	37875100
Ps000027	Unigene0041437	PsMk5-68	LGV	70.7	chr7	20282359	20285317
Ps001207	Unigene0041706	PsMk5-72	LGV	73.3	chr7	21048716	21052944
Ps001405	Unigene0022584	PsMk5-76	LGV	75.4	chr7	21667812	21669846
Ps001446	Unigene0041900	PsMk5-79	LGV	75.9	chr7	22086062	22088870
Ps001421	Unigene0042855	PsMk5-81	LGV	78.6	chr7	22420357	22423459
Ps001306	Unigene0041469	PsMk5-88	LGV	79.3	chr7	23179061	23183349
Ps001454	Unigene0009829	PsMk5-92	LGV	87.6	chr7	24667029	24672937
Ps001396	Unigene0021403	PsMk5-93	LGV	87.7	chr7	24345914	24351708
Ps001253	Unigene0081693	PsMk5-98	LGV	88.8	chr7	24919461	24925976
Ps001180	Unigene0004700	PsMk5-101	LGV	89.2	chr7	25228780	25231712
Ps001273	Unigene0041632	PsMk5-102	LGV	90	chr7	25352447	25354110
Ps001523	Unigene0043138	PsMk5-104	LGV	90	chr7	25303354	25308345
Ps001335	Unigene0005417	PsMk5-107	LGV	91.3	chr7	25635132	25642780
Ps001404	Unigene0041367	PsMk5-112	LGV	93.5	chr7	26548060	26553022
Ps001517	Unigene0043231	PsMk5-113	LGV	95.1	chr7	27231620	27236578
Ps001284	Unigene0022154	PsMk5-114	LGV	95.4	chr7	27636787	27639364
Ps001255	Unigene0010897	PsMk5-115	LGV	95.7	chr7	27983578	27988851
Ps001406	Unigene0012402	PsMk5-116	LGV	96	chr7	28182782	28184968
Ps001872	Unigene0041224	PsMk5-118	LGV	104.8	chr7	29760113	29761847
Ps001639	Unigene0009981	PsMk5-119	LGV	106.3	chr7	29919789	29922005
Ps001918	Unigene0046113	PsMk5-121	LGV	106.3	chr7	29942045	29944444
Ps001910	Unigene0010262	PsMk5-124	LGV	113.1	chr7	30496061	30501598
Ps001813	Unigene0017106	PsMk5-130	LGV	116	chr7	31383856	31387171
Ps001568	Unigene0083991	PsMk5-133	LGV	117.2	chr7	31779983	31782363
Ps001715	Unigene0041315	PsMk5-138	LGV	121.1	chr7	32642018	32642828
Ps001806	Unigene0019758	PsMk5-160	LGV	137.2	chr7	34017213	34023763
Ps000047	Unigene0042906	PsMk5-170	LGV	149.2	chr7	35871882	35874218
Ps001824	Unigene0003811	PsMk5-173	LGV	149.6	chr7	36104975	36108612
Ps001804	Unigene0028946	PsMk5-175	LGV	151.3	chr7	36431419	36431733
Ps001593	Unigene0045378	PsMk5-178	LGV	155.7	chr7	37296249	37301170
Ps000286	Unigene0084900	PsMk6-6	LGVI	10.5	chr2	1362420	1365850
Ps000094	Unigene0063490	PsMk6-9	LGVI	11.6	chr2	1696659	1696891
Ps000244	Unigene0006038	PsMk6-16	LGVI	12.7	chr2	2206566	2209033
Ps000211	Unigene0043475	PsMk6-17	LGVI	14.8	chr4	14979807	14983161
Ps000232	Unigene0011353	PsMk6-20	LGVI	33.8	chr2	6697848	6701849
Ps000233	Unigene0004740	PsMk6-21	LGVI	34.1	chr2	6942581	6944455
Ps000312	Unigene0044652	PsMk6-22	LGVI	34.3	chr2	7071048	7082405
Ps000283	Unigene0087031	PsMk6-25	LGVI	39.2	chr2	8235376	8239336
Ps000234	Unigene0006631	PsMk6-27	LGVI	40.4	chr2	9166608	9170555
Ps000266	Unigene0042707	PsMk6-31	LGVI	40.6	chr2	9108398	9110566
Ps000590	Unigene0041744	PsMk6-37	LGVI	41.6	chr2	10288091	10296937
Ps000269	Unigene0044306	PsMk6-40	LGVI	42.8	chr2	10885480	10888001
Ps001684	Unigene0004353	PsMk6-45	LGVI	53.1	chr4	44616185	44622110
Ps001775	Unigene0045552	PsMk6-58	LGVI	71.1	chr6	13837447	13840983
Ps001373	Unigene0018482	PsMk6-77	LGVI	88.5	chr6	4711886	4720987
Ps001216	Unigene0014423	PsMk6-78	LGVI	88.6	chr6	5961451	5963314
Ps001413	Unigene0034261	PsMk6-79	LGVI	88.6	chr6	4753355	4764343
Ps001453	Unigene0046973	PsMk6-84	LGVI	90.2	chr6	2246347	2250124
Ps000310	Unigene0011532	PsMk6-86	LGVI	90.7	chr1	10834222	10838727
Ps001320	Unigene0019002	PsMk6-88	LGVI	91.9	chr6	3068241	3069502
Ps001653	Unigene0011596	PsMk6-93	LGVI	92.4	chr8	21252254	21255499
Ps000121	Unigene0004400	PsMk6-105	LGVI	102.1	chr1	26058735	26060725
Ps001164	Unigene0033340	PsMk6-110	LGVI	104.4	chr6	573791	578438
Ps001821	Unigene0043601	PsMk6-112	LGVI	111.1	chr6	21235636	21240817
Ps001427	Unigene0008150	PsMk6-117	LGVI	111.4	chr6	20806337	20813018
Ps001249	Unigene0042074	PsMk6-122	LGVI	115.9	chr6	19724226	19727315
Ps001808	Unigene0082830	PsMk6-134	LGVI	128.7	chr2	17465721	17466806
Ps001652	Unigene0052977	PsMk6-138	LGVI	131.7	chr2	16197432	16198254
Ps000249	Unigene0017706	PsMk6-140	LGVI	133	chr2	20093205	20096519
Ps000084	Unigene0038457	PsMk6-146	LGVI	134.2	chr2	21410553	21414477
Ps000062	Unigene0018130	PsMk6-147	LGVI	137.4	chr2	22164694	22168847
Ps000357	Unigene0037371	PsMk6-149	LGVI	137.4	chr2	22092747	22093421
Ps000808	Unigene0004519	PsMk7-2	LGVII	0.3	chr8	32418309	32424372
Ps001120	Unigene0042844	PsMk7-7	LGVII	5.3	chr8	31384983	31393719
Ps000937	Unigene0045301	PsMk7-8	LGVII	5.6	chr8	31182495	31185841
Ps000866	Unigene0042551	PsMk7-17	LGVII	8.9	chr8	30131326	30134855
Ps000880	Unigene0009825	PsMk7-19	LGVII	9.5	chr8	30664279	30665907
Ps000948	Unigene0045243	PsMk7-22	LGVII	12.8	chr8	30003500	30008231
Ps000883	Unigene0004631	PsMk7-25	LGVII	14.9	chr8	29693374	29695064
Ps001152	Unigene0041495	PsMk7-29	LGVII	14.9	chr8	29649914	29654788
Ps000826	Unigene0042049	PsMk7-23	LGVII	14.9	chr8	29579380	29582785
Ps000791	Unigene0005069	PsMk7-30	LGVII	18.6	chr8	29323000	29326437
Ps000781	Unigene0083729	PsMk7-33	LGVII	19.8	chr8	29217860	29223973
Ps000787	Unigene0041187	PsMk7-37	LGVII	31.9	chr8	28488937	28491864
Ps001080	Unigene0041636	PsMk7-41	LGVII	31.9	chr8	28450526	28457398
Ps001042	Unigene0043182	PsMk7-40	LGVII	31.9	chr8	28485355	28486959
Ps001002	Unigene0048636	PsMk7-39	LGVII	31.9	chr8	28459172	28459706
Ps000797	Unigene0086190	PsMk7-38	LGVII	31.9	chr8	28440896	28442276
Ps000922	Unigene0009561	PsMk7-50	LGVII	40.1	chr8	27758503	27763248
Ps000936	Unigene0034070	PsMk7-52	LGVII	40.7	chr8	27692716	27697786
Ps000864	Unigene0015680	PsMk7-53	LGVII	42.1	chr8	27172476	27176721
Ps001071	Unigene0043958	PsMk7-57	LGVII	47	chr8	25992075	25994041
Ps000926	Unigene0038832	PsMk7-68	LGVII	53.4	chr8	24854938	24857763
Ps000839	Unigene0042018	PsMk7-67	LGVII	53.4	chr8	24749000	24757564
Ps001073	Unigene0043338	PsMk7-71	LGVII	55.3	chr8	24621023	24626113
Ps000907	Unigene0048231	PsMk7-70	LGVII	55.3	chr8	23808492	23809611
Ps001140	Unigene0050529	PsMk7-72	LGVII	56.2	chr8	24322814	24322991
Ps000874	Unigene0004380	PsMk7-73	LGVII	57	chr8	23682697	23687594
Ps001065	Unigene0010142	PsMk7-76	LGVII	58.6	chr8	28219629	28221932
Ps001014	Unigene0082879	PsMk7-80	LGVII	59.4	chr8	23522404	23552512
Ps001111	Unigene0008568	PsMk7-81	LGVII	60.7	chr8	23331538	23337925
Ps000862	Unigene0005025	PsMk7-98	LGVII	80.2	chr4	31834569	31842068
Ps001081	Unigene0041750	PsMk7-106	LGVII	99.3	chr5	9410315	9413448
Ps000919	Unigene0042700	PsMk7-105	LGVII	99.3	chr4	30169803	30174534
Ps000970	Unigene0042673	PsMk7-108	LGVII	99.8	chr4	29808497	29814028
Ps000882	Unigene0041522	PsMk7-113	LGVII	101.2	chr4	29294848	29296310
Ps001030	Unigene0048655	PsMk7-117	LGVII	101.8	chr4	29617741	29618425
Ps001116	Unigene0011277	PsMk7-132	LGVII	115.8	chr4	26267934	26274051
Ps001066	Unigene0022872	PsMk7-133	LGVII	119.3	chr4	26008063	26017332
Ps000942	Unigene0044071	PsMk7-134	LGVII	121.9	chr4	25609072	25612957
Ps000814	Unigene0044819	PsMk7-136	LGVII	122.9	chr4	25355691	25362650
Ps001101	Unigene0034506	PsMk7-145	LGVII	127.4	chr4	23213487	23213942
Ps000979	Unigene0015400	PsMk7-146	LGVII	128.9	chr4	22874159	22879128
Ps001782	Unigene0038023	PsMk7-148	LGVII	132.1	chr4	22881618	22883939
Ps000776	Unigene0011670	PsMk7-149	LGVII	135.5	chr4	22268208	22269846
Ps000921	Unigene0041741	PsMk7-151	LGVII	135.5	chr4	22346196	22356822
Ps000861	Unigene0006250	PsMk7-156	LGVII	135.9	chr4	22102237	22105176
Ps000834	Unigene0041791	PsMk7-155	LGVII	135.9	chr4	21896999	21901270
Ps000716	Unigene0024773	PsMk7-167	LGVII	137.9	chr4	15834315	15840130
Ps001569	Unigene0045006	PsMk7-179	LGVII	151.1	chr7	35039860	35044514
Ps000572	Unigene0041264	PsMk7-186	LGVII	160.3	chr4	14815524	14819390
Ps000478	Unigene0043273	PsMk7-184	LGVII	160.3	chr4	14845335	14848603
Ps000606	Unigene0084925	PsMk7-187	LGVII	160.3	chr4	14778746	14783527
Ps000898	Unigene0044650	PsMk7-189	LGVII	161.6	chr4	21593842	21598093
Ps000888	Unigene0042224	PsMk7-194	LGVII	162.3	chr4	21392830	21399904
Ps001077	Unigene0004623	PsMk7-195	LGVII	162.5	chr4	20465314	20471221
Ps001713	Unigene0043840	PsMk7-200	LGVII	176	chr4	20160145	20160643
Ps000741	Unigene0032732	PsMk7-203	LGVII	178.2	chr4	19055695	19060057
Ps000482	Unigene0040796	PsMk7-204	LGVII	178.4	chr4	19703734	19704035
Ps000636	Unigene0035817	PsMk7-205	LGVII	178.6	chr4	18975222	18978371
Ps001403	Unigene0004409	PsMk7-212	LGVII	183.2	chr5	16499070	16502997
Ps000531	Unigene0046954	PsMk7-211	LGVII	183.2	chr4	9256719	9260402
Ps001607	Unigene0038094	PsMk7-214	LGVII	183.4	chr8	29491021	29494970
Ps000459	Unigene0004173	PsMk7-217	LGVII	191.4	chr4	7584607	7588766
Ps000665	Unigene0043502	PsMk7-224	LGVII	200.9	chr4	5786025	5790378
Ps001366	Unigene0004802	PsMk7-229	LGVII	205.5	chr5	19992643	19999797
Ps000701	Unigene0038430	PsMk7-233	LGVII	205.8	chr4	3772357	3774968
Ps000453	Unigene0042398	PsMk7-231	LGVII	205.8	chr4	3806623	3810809
Ps000550	Unigene0009329	PsMk7-245	LGVII	217.2	chr4	1818646	1829192
Ps000720	Unigene0042978	PsMk7-246	LGVII	217.2	chr4	1831153	1834836
Ps000614	Unigene0003169	PsMk7-247	LGVII	218.9	chr4	1058733	1059812
Ps000256	Unigene0003770	PsMk7-249	LGVII	219.4	chr1	7994459	8002683
Ps000912	Unigene0004863	PsMk7-252	LGVII	219.8	chr4	207220	217115
