# Supplementary material for: High-Throughput RNA-Seq Data Analysis of the Single Nucleotide Polymorphisms (SNPs) and Zygomorphic Flower Development in Pea (Pisum sativum L.)
Source: Int J Mol Sci. 2017 Dec 20;18(12):2710. doi: 10.3390/ijms18122710 (PMC5751311; doi:10.3390/ijms18122710)
Supplement: Supplementary file 1 [file ijms-18-02710-s001.zip › Table S6.xlsx]

## Sheet: Dp-vs-Lp.GeneDiff
GeneID	DP-RPKM	LP-RPKM	log2 Ratio(LP/DP)	P-value	FDR	Description	Pathway	GO Component	GO Function	GO Process
Unigene0024503	188.727	0.001	-17.5259	0	0	Cell wall0associated hydrolase, partial [Medicago truncatula]	0	0	0	0
Unigene0044503	167.318	0.001	-17.3522	2.63284e-257	3.10485e-255	ATP synthase subunit alpha [Medicago truncatula]	0	0	0	0
Unigene0045029	145.491	0.001	-17.1506	0	0	unknow protein [Oryza sativa Japonica Group]	0	GO:0032991//macromolecular complex;GO:0044424//intracellular part;GO:0044425//membrane part	GO:0016820//hydrolase activity, acting on acid anhydrides, catalyzing transmembrane movement of substances	GO:0071704;GO:0015992//proton transport;GO:0044237//cellular metabolic process;GO:0044710;GO:0044238//primary metabolic process
Unigene0045024	126.488	0.001	-16.9486	0	0	hypothetical protein M569_00248, partial [Genlisea aurea]	0	0	0	0
Unigene0046854	89.4286	0.001	-16.4484	1.21809e-238	1.4221e-236	Cell wall0associated hydrolase [Medicago truncatula]	0	0	0	0
Unigene0045451	78.3637	0.001	-16.2579	3.02198e-167	3.37618e-165	Cell wall0associated hydrolase, partial [Medicago truncatula]	0	0	0	0
Unigene0047384	41.2457	0.001	-15.332	5.08404e-69	4.71074e-67	0	0	0	0	0
Unigene0008100	17.2737	0.001	-14.0763	1.47978e-33	1.09459e-31	0	0	0	0	0
Unigene0050433	7.0825	0.001	-12.79	1.71929e-13	7.6515e-12	0	0	0	0	0
Unigene0052634	6.47543	0.001	-12.6608	1.59117e-09	3.57129e-08	0	0	0	0	0
Unigene0063380	5.25712	0.001	-12.3601	3.7026e-11	9.96785e-10	predicted protein [Populus trichocarpa]	0	0	0	0
Unigene0048939	4.31695	0.001	-12.0758	2.52e-05	0.000294157	0	0	0	0	0
Unigene0061308	4.17198	0.001	-12.0265	2.7229e-09	5.9475e-08	beta glucosidase 19 [Arabidopsis thaliana]	0	GO:0005911//cell0cell junction;GO:0009536//plastid;GO:0042579//microbody;GO:0044432//endoplasmic reticulum part	GO:0046914//transition metal ion binding;GO:0008422//beta0glucosidase activity;GO:0016788//hydrolase activity, acting on ester bonds;GO:0019899//enzyme binding	GO:0000003//reproduction;GO:0006066//alcohol metabolic process;GO:0010118//stomatal movement;GO:0048878//chemical homeostasis;GO:0010208//pollen wall assembly;GO:0006996//organelle organization;GO:0006970//response to osmotic stress;GO:0044238//primary metabolic process;GO:0043623//cellular protein complex assembly;GO:0009409//response to cold;GO:0009738//abscisic acid mediated signaling pathway;…
Unigene0039295	3.95938	0.001	-11.9511	2.00244e-07	3.43292e-06	Heavy metal transport/detoxification superfamily protein isoform 1 [Theobroma cacao]	0	0	GO:0043169//cation binding	GO:0006812//cation transport
Unigene0013087	3.84861	0.001	-11.9101	5.86394e-07	9.35892e-06	Em protein [Brassica napus]	0	GO:0044424//intracellular part	0	GO:0009725//response to hormone stimulus;GO:0048507//meristem development;GO:0009756//carbohydrate mediated signaling;GO:0032446//protein modification by small protein conjugation;GO:0009409//response to cold;GO:0009908//flower development;GO:0010876;GO:0006721//terpenoid metabolic process;GO:0009639//response to red or far red light
Unigene0061791	3.80617	0.001	-11.8941	2.33504e-08	4.54353e-07	0	0	0	0	0
Unigene0060903	3.74759	0.001	-11.8717	1.4726e-05	0.000182251	0	0	0	0	0
Unigene0012330	3.40447	0.001	-11.7332	7.97378e-09	1.64863e-07	late embryogenesis abundant protein M17 [Arabidopsis thaliana]	0	0	0	GO:0009987//cellular process;GO:0048856//anatomical structure development;GO:0007275//multicellular organismal development;GO:0003006//developmental process involved in reproduction
Unigene0012331	3.35223	0.001	-11.7109	5.02866e-06	6.81603e-05	late embryogenesis abundant protein M17 [Arabidopsis thaliana]	0	0	0	GO:0048316//seed development;GO:0044763;GO:0009790//embryo development
Unigene0067732	2.85281	0.001	-11.4782	7.37958e-05	0.000773041	0	0	0	0	0
Unigene0021279	2.85227	0.001	-11.4779	2.7229e-09	5.94936e-08	Flavanone 30hydroxylase [Medicago truncatula]	ko00941//Flavonoid biosynthesis	0	GO:0016706//oxidoreductase activity, acting on paired donors, with incorporation or reduction of molecular oxygen, 20oxoglutarate as one donor, and incorporation of one atom each of oxygen into both donors	GO:0044710
Unigene0014467	2.76237	0.001	-11.4317	8.60534e-06	0.000111608	defensin [Brassica napus]	0	GO:0030312//external encapsulating structure	0	GO:0000160//two0component signal transduction system (phosphorelay);GO:0051707//response to other organism;GO:0009611//response to wounding;GO:0014070//response to organic cyclic compound;GO:0010476//gibberellin mediated signaling pathway;GO:0009685//gibberellin metabolic process
Unigene0061114	2.72404	0.001	-11.4115	1.7172e-06	2.52866e-05	0	0	0	0	0
Unigene0014392	2.5816	0.001	-11.334	1.08427e-10	2.79647e-09	hypothetical protein MTR_4g012680 [Medicago truncatula]	0	0	0	0
Unigene0070876	2.50277	0.001	-11.2893	7.37958e-05	0.000772925	0	0	0	0	0
Unigene0055298	2.49929	0.001	-11.2873	8.60534e-06	0.000111546	0	0	0	0	0
Unigene0070762	2.45016	0.001	-11.2587	7.37958e-05	0.000773156	0	0	0	0	0
Unigene0086943	2.30481	0.001	-11.1704	1.4726e-05	0.000182219	0	0	0	0	0
Unigene0006186	2.08872	0.001	-11.0284	1.26591e-18	7.28644e-17	PREDICTED: beta0amyrin 110oxidase0like [Cicer arietinum]	ko00904//Diterpenoid biosynthesis	0	0	0
Unigene0010966	2.03881	0.001	-10.9935	1.08427e-10	2.7975e-09	0	0	0	0	0
Unigene0065003	1.96859	0.001	-10.9429	9.29826e-10	2.13973e-08	Polygalacturonase0like protein [Medicago truncatula]	0	0	0	0
Unigene0005705	1.77371	0.001	-10.7926	7.37958e-05	0.000773272	Lactoylglutathione lyase [Medicago truncatula]	ko00620//Pyruvate metabolism;ko04011//MAPK signaling pathway 0 yeast	0	0	0
Unigene0011650	1.64402	0.001	-10.683	3.42668e-07	5.66255e-06	Transcription activator BRG1 [Medicago truncatula]	0	0	0	0
Unigene0019903	1.62117	0.001	-10.6628	1.7172e-06	2.52919e-05	PREDICTED: zinc finger protein MAGPIE0like isoform X1 [Cicer arietinum]	0	0	0	0
Unigene0051772	1.5602	0.001	-10.6075	4.31236e-05	0.00047812	PREDICTED: ABC transporter G family member 150like [Glycine max]	0	0	GO:0017111//nucleoside0triphosphatase activity;GO:0032550	GO:0009154
Unigene0007990	1.51093	0.001	-10.5612	2.93858e-06	4.1568e-05	PREDICTED: uncharacterized protein LOC101489855 isoform X2 [Cicer arietinum]	0	0	0	0
Unigene0058016	1.48861	0.001	-10.5397	2.52e-05	0.000294108	0	0	0	0	0
Unigene0054917	1.47408	0.001	-10.5256	2.93858e-06	4.15764e-05	0	0	0	0	0
Unigene0021123	1.43898	0.001	-10.4908	8.60534e-06	0.000111567	PREDICTED: myb0related protein Myb40like isoform X1 [Cicer arietinum]	0	0	0	0
Unigene0008129	1.17935	0.001	-10.2038	5.02866e-06	6.81471e-05	PREDICTED: aldehyde dehydrogenase family 3 member F10like [Cicer arietinum]	ko00010//Glycolysis / Gluconeogenesis;ko00620//Pyruvate metabolism;ko00330//Arginine and proline metabolism;ko00040//Pentose and glucuronate interconversions;ko00561//Glycerolipid metabolism;ko00071//Fatty acid metabolism;ko00280//Valine, leucine and isoleucine degradation;ko00410//beta0Alanine metabolism;ko00380//Tryptophan metabolism;ko00640//Propanoate metabolism;ko00053//Ascorbate and aldarat…	GO:0043231//intracellular membrane0bounded organelle	GO:0016620//oxidoreductase activity, acting on the aldehyde or oxo group of donors, NAD or NADP as acceptor	GO:0009414//response to water deprivation;GO:0009605//response to external stimulus;GO:0044237//cellular metabolic process;GO:0019932//second0messenger0mediated signaling;GO:0044710
Unigene0048749	1.11234	0.001	-10.1194	2.52e-05	0.000294059	Disease resistance response protein Pi49 [Medicago truncatula]	0	0	0	GO:0006950//response to stress
Unigene0018054	0.650925	0.001	-9.34635	8.60534e-06	0.000111587	Auxin0induced protein 5NG4 [Medicago truncatula]	0	0	0	0
Unigene0010189	0.562662	0.001	-9.13612	1.7172e-06	2.52972e-05	Alanine0glyoxylate aminotransferase0like protein [Medicago truncatula]	ko00260//Glycine, serine and threonine metabolism;ko00250//Alanine, aspartate and glutamate metabolism	GO:0043231//intracellular membrane0bounded organelle;GO:0031090//organelle membrane	GO:0043168;GO:0008483//transaminase activity;GO:0046914//transition metal ion binding	GO:0010038//response to metal ion;GO:0006527//arginine catabolic process
Unigene0021296	0.466744	0.001	-8.86649	1.00347e-06	1.54556e-05	0	0	0	0	0
Unigene0009626	0.393436	0.001	-8.61999	4.31236e-05	0.000478196	PREDICTED: calcium0dependent protein kinase 160like [Cicer arietinum]	0	0	GO:0046872//metal ion binding;GO:0004674//protein serine/threonine kinase activity;GO:0032550	GO:0006796//phosphate0containing compound metabolic process;GO:0006464//protein modification process
Unigene0008425	11.4033	0.267209	-5.41534	1.55772e-25	1.03624e-23	PREDICTED: protein PLANT CADMIUM RESISTANCE 10like [Cicer arietinum]	0	0	0	0
Unigene0018425	59.3275	1.69552	-5.12891	0	0	LST1 [Pisum sativum]	0	GO:0043231//intracellular membrane0bounded organelle	GO:0003676//nucleic acid binding;GO:0001071//nucleic acid binding transcription factor activity	GO:0009791//post0embryonic development;GO:0006351//transcription, DNA0dependent
Unigene0039293	7.79075	0.248943	-4.96788	1.2481e-09	2.84042e-08	metal ion binding protein [Cucumis melo subsp. melo]	0	0	GO:0043169//cation binding	GO:0006812//cation transport
Unigene0059516	3.36573	0.122911	-4.77523	7.16074e-16	3.80579e-14	hypothetical protein MTR_5g095430 [Medicago truncatula]	0	0	0	0
Unigene0018426	48.2407	1.79159	-4.75094	0	0	CYC1 [Pisum sativum]	0	0	0	0
Unigene0056375	2.28182	0.0867065	-4.7179	4.57164e-08	8.58319e-07	Auxin0induced protein 6B [Medicago truncatula]	ko04075//Plant hormone signal transduction	GO:0043231//intracellular membrane0bounded organelle	0	GO:0009725//response to hormone stimulus
Unigene0042429	148.048	6.25766	-4.5643	1.25655e-236	1.46456e-234	chalcone synthase [Pisum sativum]	ko04712//Circadian rhythm 0 plant;ko00941//Flavonoid biosynthesis	0	0	0
Unigene0049545	5.03645	0.214577	-4.55284	3.53234e-07	5.82753e-06	0	0	0	0	0
Unigene0045659	86.3751	3.71754	-4.53819	1.08985e-128	1.15321e-126	0	0	0	0	0
Unigene0011980	2.01026	0.0911721	-4.46264	9.7759e-07	1.51068e-05	PREDICTED: lysine histidine transporter0like 80like [Cicer arietinum]	0	0	0	0
Unigene0046085	89.9346	4.39512	-4.3549	9.72288e-137	1.043e-134	CYC1 [Pisum sativum]	0	0	0	0
Unigene0015281	8.21479	0.412487	-4.3158	3.117e-11	8.45634e-10	Chalcone synthase [Medicago truncatula]	ko04712//Circadian rhythm 0 plant;ko00941//Flavonoid biosynthesis	0	GO:0016747//transferase activity, transferring acyl groups other than amino0acyl groups;GO:0046914//transition metal ion binding;GO:0016702//oxidoreductase activity, acting on single donors with incorporation of molecular oxygen, incorporation of two atoms of oxygen	GO:0006633//fatty acid biosynthetic process
Unigene0086740	0.824418	0.042149	-4.28981	5.15754e-11	1.37421e-09	Protein WAX2 [Medicago truncatula]	0	0	0	0
Unigene0049747	13.1339	0.675576	-4.28104	1.09846e-30	7.90809e-29	PREDICTED: anthocyanin 3'0O0beta0glucosyltransferase0like [Cicer arietinum]	0	0	GO:0016757//transferase activity, transferring glycosyl groups	0
Unigene0050544	4.93491	0.256973	-4.26333	7.40876e-06	9.73506e-05	LRR receptor0like serine/threonine0protein kinase FEI [Medicago truncatula]	0	0	GO:0036094;GO:0004672//protein kinase activity;GO:1901363;GO:0097159	GO:0006796//phosphate0containing compound metabolic process
Unigene0005766	70.5706	3.72072	-4.24541	1.84051e-186	2.08617e-184	Os05g0178300 [Oryza sativa Japonica Group]	0	0	0	0
Unigene0041389	301.735	16.0578	-4.23194	0	0	Chalcone synthase [Medicago truncatula]	ko04712//Circadian rhythm 0 plant;ko00941//Flavonoid biosynthesis	0	GO:0046983//protein dimerization activity;GO:0016747//transferase activity, transferring acyl groups other than amino0acyl groups	GO:0008152//metabolic process
Unigene0056002	3.19818	0.172942	-4.20889	2.32826e-10	5.76094e-09	Cysteine0rich RLK (RECEPTOR0like protein kinase) 8 [Theobroma cacao]	0	0	GO:0003676//nucleic acid binding	GO:0006259//DNA metabolic process
Unigene0042583	224.711	12.1567	-4.20825	0	0	anthocyanidin reductase [Trifolium repens]	ko00941//Flavonoid biosynthesis	0	0	0
Unigene0000960	3.90041	0.212963	-4.19495	1.83525e-19	1.07579e-17	DNA/RNA polymerases superfamily protein [Theobroma cacao]	0	0	0	0
Unigene0031776	1.73272	0.0974454	-4.1523	2.02688e-05	0.000242993	CCR40associated factor [Medicago truncatula]	0	GO:0043231//intracellular membrane0bounded organelle	GO:0097159	0
Unigene0081616	0.927333	0.0521516	-4.1523	2.02688e-05	0.000242952	0	0	0	0	0
Unigene0084715	4.5328	0.265539	-4.09341	9.93208e-14	4.59533e-12	0	0	0	0	0
Unigene0033941	79.1205	4.67475	-4.08109	2.07384e-203	2.36212e-201	PREDICTED: extensin0like [Cicer arietinum]	0	0	0	0
Unigene0043875	99.0838	5.85904	-4.07991	0	0	PREDICTED: flavonoid 3'0monooxygenase0like [Cicer arietinum]	ko00941//Flavonoid biosynthesis;ko00944//Flavone and flavonol biosynthesis	0	GO:0046906//tetrapyrrole binding;GO:0046914//transition metal ion binding;GO:0016709//oxidoreductase activity, acting on paired donors, with incorporation or reduction of molecular oxygen, NADH or NADPH as one donor, and incorporation of one atom of oxygen	GO:0009813//flavonoid biosynthetic process;GO:0009725//response to hormone stimulus;GO:0044710;GO:0034285;GO:0009411//response to UV
Unigene0043899	182.737	11.2737	-4.01873	0	0	Leucoanthocyanidin dioxygenase [Medicago truncatula]	ko00941//Flavonoid biosynthesis	GO:0044424//intracellular part	GO:0016706//oxidoreductase activity, acting on paired donors, with incorporation or reduction of molecular oxygen, 20oxoglutarate as one donor, and incorporation of one atom each of oxygen into both donors	GO:0009813//flavonoid biosynthetic process;GO:0009699//phenylpropanoid biosynthetic process;GO:0009725//response to hormone stimulus;GO:0006950//response to stress;GO:0006996//organelle organization
Unigene0058325	4.22673	0.273223	-3.95139	5.22638e-16	2.79255e-14	0	0	0	0	0
Unigene0004015	57.6816	3.74092	-3.94664	3.53746e-104	3.60692e-102	proline0 and leucine0rich protein [Pisum sativum]	0	0	0	0
Unigene0024112	24.254	1.59134	-3.92991	2.21912e-77	2.14115e-75	DNA/RNA polymerases superfamily protein [Theobroma cacao]	0	0	GO:0046872//metal ion binding;GO:0003676//nucleic acid binding;GO:0016740//transferase activity	GO:0006259//DNA metabolic process
Unigene0047663	2.50497	0.167709	-3.90076	3.38234e-08	6.46113e-07	Proline0rich protein [Medicago truncatula]	0	0	0	0
Unigene0042599	329.536	22.1256	-3.89665	0	0	chalcone synthase [Pisum sativum]	ko04712//Circadian rhythm 0 plant;ko00941//Flavonoid biosynthesis	0	GO:0016747//transferase activity, transferring acyl groups other than amino0acyl groups	GO:0008152//metabolic process
Unigene0011778	12.5972	0.850755	-3.88822	9.4315e-40	7.3326e-38	MADS box protein M2 [Pisum sativum]	0	0	0	0
Unigene0027633	0.944334	0.0659724	-3.83936	4.4647e-28	3.09958e-26	RNA polymerase beta'' subunit [Pisum sativum]	ko00230//Purine metabolism;ko00240//Pyrimidine metabolism;ko03020//RNA polymerase	GO:0009536//plastid;GO:0033178//proton0transporting two0sector ATPase complex, catalytic domain	GO:0032550;GO:0019829//cation0transporting ATPase activity;GO:0015078//hydrogen ion transmembrane transporter activity;GO:0003676//nucleic acid binding;GO:0034062//RNA polymerase activity	GO:0015988//energy coupled proton transport, against electrochemical gradient;GO:0010467//gene expression;GO:0006754//ATP biosynthetic process;GO:0009059//macromolecule biosynthetic process
Unigene0042089	386.293	26.9986	-3.83874	5.06676e-288	6.01562e-286	Chalcone synthase [Medicago truncatula]	ko04712//Circadian rhythm 0 plant;ko00941//Flavonoid biosynthesis	0	0	0
Unigene0029185	79.2693	5.54168	-3.83837	1.77243e-61	1.59176e-59	0	0	0	0	0
Unigene0000819	1.64232	0.115452	-3.83037	9.06186e-08	1.63559e-06	0	0	0	0	0
Unigene0042126	106.286	7.65358	-3.79568	0	0	Germin0like protein [Medicago truncatula]	0	0	0	0
Unigene0036725	6.15956	0.444107	-3.79385	1.481e-07	2.58774e-06	Receptor0like serine/threonine kinase [Medicago truncatula]	0	0	GO:0004672//protein kinase activity	GO:0006796//phosphate0containing compound metabolic process
Unigene0041323	473.025	34.1921	-3.79018	0	0	chalcone synthase 1 [Glycyrrhiza uralensis]	ko04712//Circadian rhythm 0 plant;ko00941//Flavonoid biosynthesis	0	GO:0016747//transferase activity, transferring acyl groups other than amino0acyl groups	GO:0008152//metabolic process
Unigene0063024	2.36278	0.17484	-3.75637	2.4178e-07	4.09489e-06	0	0	0	0	0
Unigene0043434	246.598	18.3103	-3.75144	8.24998e-239	9.64779e-237	chalone synthase [Senna tora]	ko04712//Circadian rhythm 0 plant;ko00941//Flavonoid biosynthesis	0	0	0
Unigene0055560	2.25725	0.171546	-3.7179	3.94274e-07	6.46047e-06	0	0	0	0	0
Unigene0084237	0.788499	0.0599241	-3.7179	3.94274e-07	6.46198e-06	PREDICTED: sister chromatid cohesion 1 protein 10like [Cicer arietinum]	0	0	0	0
Unigene0051867	11.332	0.930355	-3.60648	5.17514e-23	3.26883e-21	0	0	0	0	0
Unigene0013790	0.746683	0.0617532	-3.59591	1.69714e-06	2.50281e-05	PREDICTED: rhodanese0like domain0containing protein 70like [Cicer arietinum]	0	GO:0009521;GO:0031224//intrinsic to membrane;GO:0009536//plastid	0	GO:0044237//cellular metabolic process;GO:0044767
Unigene0043580	94.1582	7.8861	-3.5777	0	0	Flavonol synthase/flavanone 30hydroxylase [Medicago truncatula]	ko00941//Flavonoid biosynthesis	0	0	0
Unigene0022745	3.33002	0.279514	-3.57454	9.09518e-12	2.6635e-10	NTH1 [Pisum sativum]	0	0	GO:0008233//peptidase activity	0
Unigene0025510	6.46165	0.542377	-3.57454	9.09518e-12	2.66238e-10	phenylalanine ammonia lyase [Trifolium pratense]	ko00940//Phenylpropanoid biosynthesis;ko00360//Phenylalanine metabolism;ko00910//Nitrogen metabolism	0	0	0
Unigene0046891	11.6264	0.986412	-3.55907	5.59196e-74	5.28625e-72	Flavonoid 3'0hydroxylase [Medicago truncatula]	ko00941//Flavonoid biosynthesis;ko00944//Flavone and flavonol biosynthesis	0	GO:0046906//tetrapyrrole binding;GO:0046914//transition metal ion binding;GO:0016709//oxidoreductase activity, acting on paired donors, with incorporation or reduction of molecular oxygen, NADH or NADPH as one donor, and incorporation of one atom of oxygen	GO:0009813//flavonoid biosynthetic process;GO:0009725//response to hormone stimulus;GO:0044710;GO:0034285;GO:0009411//response to UV
Unigene0007192	1.81086	0.159124	-3.50845	4.46042e-06	6.10846e-05	Ethylene responsive transcription factor 2b [Medicago truncatula]	0	GO:0043231//intracellular membrane0bounded organelle	GO:0003676//nucleic acid binding;GO:0001071//nucleic acid binding transcription factor activity	GO:0006351//transcription, DNA0dependent
Unigene0052594	4.4907	0.394609	-3.50845	4.46042e-06	6.10966e-05	0	0	0	0	0
Unigene0065555	3.09935	0.272347	-3.50845	4.46042e-06	6.11085e-05	PREDICTED: CLAVATA3/ESR (CLE)0related protein 30like [Cicer arietinum]	0	0	0	0
Unigene0083976	1.94528	0.173649	-3.48573	1.01022e-20	6.10042e-19	Protein WAX2 [Medicago truncatula]	0	0	0	0
Unigene0029186	67.3123	6.05977	-3.47353	0	0	0	0	0	0	0
Unigene0031918	8.2657	0.749756	-3.46264	1.57619e-15	8.25808e-14	ribosomal protein L36 [Pisum sativum]	ko03010//Ribosome	GO:0009526//plastid envelope;GO:0009532//plastid stroma;GO:0030529//ribonucleoprotein complex	GO:0005198//structural molecule activity	GO:0006351//transcription, DNA0dependent
Unigene0049672	15.1459	1.38877	-3.44705	1.86728e-43	1.48807e-41	Myb0like protein AA [Medicago truncatula]	0	GO:0043231//intracellular membrane0bounded organelle	GO:0003676//nucleic acid binding	0
Unigene0023084	4.69469	0.455209	-3.36643	1.87818e-05	0.000226797	PREDICTED: uncharacterized protein LOC100785198 [Glycine max]	0	0	0	0
Unigene0066890	2.68817	0.260651	-3.36643	1.87818e-05	0.000226758	0	0	0	0	0
Unigene0013393	0.708632	0.0687108	-3.36643	1.87818e-05	0.000226719	L0ascorbate oxidase0like protein [Medicago truncatula]	0	0	GO:0003824//catalytic activity;GO:0046914//transition metal ion binding	GO:0044710
Unigene0042504	158.713	15.8867	-3.32053	2.75314e-181	3.10555e-179	PREDICTED: chalcone synthase 1B0like [Cicer arietinum]	ko04712//Circadian rhythm 0 plant;ko00941//Flavonoid biosynthesis	0	GO:0016747//transferase activity, transferring acyl groups other than amino0acyl groups	GO:0008152//metabolic process
Unigene0015543	0.865747	0.0869431	-3.3158	3.02224e-05	0.000346206	PREDICTED: phosphatidylglycerophosphatase GEP4, mitochondrial0like isoform X1 [Cicer arietinum]	0	GO:0043231//intracellular membrane0bounded organelle	0	0
Unigene0017956	121.802	12.3396	-3.30318	0	0	PREDICTED: extensin0like [Cicer arietinum]	0	0	0	0
Unigene0050066	8.81981	0.914775	-3.26926	4.1883e-19	2.43474e-17	hypothetical protein MTR_8g087320 [Medicago truncatula]	0	0	0	0
Unigene0005765	18.7068	1.94534	-3.26547	1.55808e-50	1.29469e-48	Os05g0178300 [Oryza sativa Japonica Group]	0	0	0	0
Unigene0051469	2.5497	0.265539	-3.26333	4.85368e-05	0.000531991	0	0	0	0	0
Unigene0004736	2.50431	0.264072	-3.24541	7.31454e-13	2.76512e-11	PREDICTED: GDSL esterase/lipase At5g459600like [Cicer arietinum]	0	0	0	0
Unigene0051496	1.89856	0.200197	-3.24541	5.72092e-07	9.14942e-06	PREDICTED: probable glycosyltransferase At3g076200like [Cicer arietinum]	0	0	0	GO:0006351//transcription, DNA0dependent
Unigene0024593	2.09206	0.226258	-3.20889	9.14542e-07	1.41732e-05	PREDICTED: uncharacterized LOC101214603 [Cucumis sativus]	0	0	0	0
Unigene0051797	2.07487	0.224399	-3.20889	9.14542e-07	1.417e-05	Calcium binding protein [Medicago truncatula]	ko04626//Plant0pathogen interaction	0	GO:0046872//metal ion binding	0
Unigene0012420	2.20286	0.23824	-3.20889	7.77882e-05	0.000810138	gamma0gliadin, partial [Lophopyrum elongatum]	0	0	0	0
Unigene0045342	93.3159	10.2839	-3.18173	9.55708e-121	1.00069e-118	phenylalanine ammonia lyase [Trifolium pratense]	ko00940//Phenylpropanoid biosynthesis;ko00360//Phenylalanine metabolism;ko00910//Nitrogen metabolism	GO:0044424//intracellular part	GO:0016841//ammonia0lyase activity	GO:0009699//phenylpropanoid biosynthetic process;GO:0006558//L0phenylalanine metabolic process
Unigene0084282	5.52405	0.611076	-3.1763	3.03872e-57	2.66074e-55	NAD(P)H0quinone oxidoreductase subunit H [Medicago truncatula]	ko00190//Oxidative phosphorylation	0	0	0
Unigene0086069	3.45183	0.383142	-3.17141	4.71496e-12	1.4627e-10	GDSL esterase/lipase [Medicago truncatula]	0	0	0	0
Unigene0011962	19.7107	2.23939	-3.1378	4.87426e-43	3.87556e-41	glycine0rich protein [Gossypium hirsutum]	0	0	0	0
Unigene0024111	12.3676	1.41436	-3.12834	1.28599e-30	9.24871e-29	DNA/RNA polymerases superfamily protein [Theobroma cacao]	0	0	GO:0046872//metal ion binding;GO:0003676//nucleic acid binding;GO:0016740//transferase activity	GO:0006259//DNA metabolic process
Unigene0033947	0.468284	0.053746	-3.12316	4.56274e-08	8.56878e-07	ATP synthase CF1 alpha subunit [Pisum sativum]	ko00190//Oxidative phosphorylation;ko00195//Photosynthesis	GO:0033178//proton0transporting two0sector ATPase complex, catalytic domain;GO:0019866//organelle inner membrane;GO:0009534//chloroplast thylakoid	GO:0032550;GO:0019829//cation0transporting ATPase activity;GO:0015078//hydrogen ion transmembrane transporter activity	GO:0015988//energy coupled proton transport, against electrochemical gradient;GO:0015986//ATP synthesis coupled proton transport
Unigene0028203	12.9969	1.51017	-3.10538	3.71394e-18	2.122e-16	PREDICTED: phenylalanine ammonia0lyase0like [Cicer arietinum]	ko00940//Phenylpropanoid biosynthesis;ko00360//Phenylalanine metabolism;ko00910//Nitrogen metabolism	GO:0044424//intracellular part	GO:0016841//ammonia0lyase activity	GO:0009699//phenylpropanoid biosynthetic process;GO:0006558//L0phenylalanine metabolic process
Unigene0052836	4.76525	0.57193	-3.05864	1.56032e-12	5.43775e-11	0	0	0	0	0
Unigene0056653	3.76836	0.454128	-3.05277	5.87454e-06	7.87269e-05	0	0	0	0	0
Unigene0019000	6.01892	0.741545	-3.0209	1.22755e-27	8.46346e-26	MYB transcription factor [Medicago truncatula]	0	0	0	0
Unigene0004654	292.057	36.2017	-3.01212	0	0	pollen Ole e 1 allergen and extensin family protein [Arabidopsis thaliana]	0	0	0	0
Unigene0050338	5.46508	0.677971	-3.01095	9.3098e-06	0.000119813	0	0	0	0	0
Unigene0045950	30.014	3.80852	-2.97833	5.05408e-112	5.22173e-110	phenylalanine ammonia0lyase 2 [Cicer arietinum]	ko00940//Phenylpropanoid biosynthesis;ko00360//Phenylalanine metabolism;ko00910//Nitrogen metabolism	0	0	0
Unigene0003546	28.9834	3.69195	-2.97277	3.35578e-158	3.70771e-156	UDP0glucuronosyltransferase 106 [Medicago truncatula]	0	0	GO:0016757//transferase activity, transferring glycosyl groups	0
Unigene0045218	6.15566	0.786781	-2.96788	1.47243e-05	0.000182263	PREDICTED: BURP domain0containing protein 90like [Cicer arietinum]	0	0	0	0
Unigene0054056	2.76483	0.356627	-2.9547	8.83084e-16	4.68275e-14	Os08g0442350 [Oryza sativa Japonica Group]	0	0	0	0
Unigene0009126	11.7718	1.52189	-2.95139	7.92496e-13	2.96547e-11	ripening0related protein0like [Vitis vinifera]	0	0	GO:0003824//catalytic activity	0
Unigene0001819	12.1295	1.57721	-2.94307	5.13504e-47	4.19236e-45	Leucoanthocyanidin reductase [Medicago truncatula]	ko00941//Flavonoid biosynthesis	0	0	0
Unigene0033944	3.41358	0.445906	-2.93648	3.47968e-55	3.00924e-53	ATP synthase CF1 alpha subunit [Pisum sativum]	ko00190//Oxidative phosphorylation;ko00195//Photosynthesis	GO:0033178//proton0transporting two0sector ATPase complex, catalytic domain;GO:0019866//organelle inner membrane;GO:0009534//chloroplast thylakoid	GO:0032550;GO:0019829//cation0transporting ATPase activity;GO:0015078//hydrogen ion transmembrane transporter activity	GO:0015988//energy coupled proton transport, against electrochemical gradient;GO:0015986//ATP synthesis coupled proton transport
Unigene0045851	51.6529	6.77521	-2.93051	1.97605e-46	1.60209e-44	phenylalanine ammonia lyase [Trifolium pratense]	ko00940//Phenylpropanoid biosynthesis;ko00360//Phenylalanine metabolism;ko00910//Nitrogen metabolism	GO:0044424//intracellular part	GO:0016841//ammonia0lyase activity	GO:0009411//response to UV;GO:0006575//cellular modified amino acid metabolic process;GO:0006558//L0phenylalanine metabolic process;GO:0009813//flavonoid biosynthetic process;GO:0009414//response to water deprivation;GO:0048229//gametophyte development;GO:0009696//salicylic acid metabolic process;GO:0009699//phenylpropanoid biosynthetic process;GO:0009808//lignin metabolic process;GO:0006595//pol…
Unigene0004885	38.5588	5.05979	-2.92991	1.96466e-60	1.75763e-58	PREDICTED: phenylalanine ammonia0lyase 20like [Glycine max]	ko00940//Phenylpropanoid biosynthesis;ko00360//Phenylalanine metabolism;ko00910//Nitrogen metabolism	0	0	0
Unigene0057159	3.49097	0.460139	-2.92348	1.15239e-09	2.63116e-08	0	0	0	0	0
Unigene0058546	1.61886	0.213379	-2.92348	2.32388e-05	0.000273405	PREDICTED: galactinol00sucrose galactosyltransferase0like [Cicer arietinum]	0	0	0	0
Unigene0020281	9.17273	1.22375	-2.90604	3.2267e-19	1.88199e-17	0	0	0	0	0
Unigene0044610	70.6039	9.45015	-2.90134	0	0	PREDICTED: 40coumarate00CoA ligase 20like isoform X1 [Cicer arietinum]	ko00940//Phenylpropanoid biosynthesis;ko00360//Phenylalanine metabolism;ko00130//Ubiquinone and other terpenoid0quinone biosynthesis	0	0	0
Unigene0047070	31.5274	4.26535	-2.88587	7.37184e-70	6.8396e-68	MYB transcription factor [Medicago truncatula]	0	0	0	0
Unigene0043823	120.003	16.3644	-2.87443	0	0	flavonoid 3' 5' hydroxylase [Pisum sativum]	ko00941//Flavonoid biosynthesis;ko00944//Flavone and flavonol biosynthesis	0	GO:0016709//oxidoreductase activity, acting on paired donors, with incorporation or reduction of molecular oxygen, NADH or NADPH as one donor, and incorporation of one atom of oxygen;GO:0046914//transition metal ion binding;GO:0046906//tetrapyrrole binding	GO:0044710
Unigene0032927	28.3962	3.88492	-2.86974	1.88232e-63	1.70135e-61	acetyl0CoA carboxylase beta subunit [Pisum sativum]	ko00710//Carbon fixation in photosynthetic organisms;ko00630//Glyoxylate and dicarboxylate metabolism	GO:0009536//plastid	GO:0043167//ion binding;GO:0003824//catalytic activity	GO:0044237//cellular metabolic process;GO:0006629//lipid metabolic process;GO:0044281//small molecule metabolic process
Unigene0048723	2.05127	0.281366	-2.866	7.5157e-12	2.22702e-10	PREDICTED: sucrose transport protein SUC20like [Cicer arietinum]	0	GO:0016021//integral to membrane	GO:0015154	GO:0015766;GO:0044763
Unigene0018325	610.28	83.7412	-2.86546	0	0	GDSL esterase/lipase [Medicago truncatula]	0	0	GO:0016787//hydrolase activity	GO:0044238//primary metabolic process
Unigene0042055	406.215	56.0162	-2.85833	0	0	cytochrome P450 [Glycyrrhiza echinata]	0	0	0	0
Unigene0003708	17.2093	2.37635	-2.85637	1.0781e-15	5.69529e-14	PREDICTED: auxin0induced protein 22E0like [Cicer arietinum]	0	GO:0043231//intracellular membrane0bounded organelle	GO:0005515//protein binding	GO:0009755//hormone0mediated signaling pathway;GO:0006351//transcription, DNA0dependent
Unigene0005007	63.1515	8.74362	-2.85251	6.05194e-127	6.39415e-125	PREDICTED: transcription factor CPC0like [Cicer arietinum]	0	0	0	0
Unigene0047993	23.1322	3.25228	-2.83037	1.16686e-107	1.19674e-105	UDP0glucuronosyltransferase 2A3 [Medicago truncatula]	0	0	0	0
Unigene0048253	11.6894	1.65531	-2.82003	6.07632e-19	3.52351e-17	PREDICTED: chaperone protein dnaJ 11, chloroplastic0like [Cicer arietinum]	0	0	0	0
Unigene0047866	15.0722	2.13997	-2.81623	1.35681e-52	1.15204e-50	Glucan endo01,30beta0glucosidase [Medicago truncatula]	0	0	0	0
Unigene0019904	15.0953	2.18737	-2.78683	3.39988e-46	2.74376e-44	PREDICTED: zinc finger protein MAGPIE0like isoform X1 [Cicer arietinum]	0	0	0	0
Unigene0009173	1.68744	0.245427	-2.78147	9.0096e-05	0.000923355	PREDICTED: fatty acyl0CoA reductase 30like [Cicer arietinum]	0	0	GO:0034062//RNA polymerase activity;GO:0016620//oxidoreductase activity, acting on the aldehyde or oxo group of donors, NAD or NADP as acceptor	GO:0009059//macromolecule biosynthetic process
Unigene0036730	7.87133	1.14484	-2.78147	1.69237e-08	3.35643e-07	PREDICTED: probable leucine0rich repeat receptor0like serine/threonine0protein kinase At3g148400like isoform X3 [Cicer arietinum]	0	0	GO:0004672//protein kinase activity;GO:0032550	GO:0006796//phosphate0containing compound metabolic process;GO:0006464//protein modification process
Unigene0049998	5.8331	0.85428	-2.77148	3.35462e-07	5.55133e-06	Homeobox0leucine zipper protein ATHB07 [Medicago truncatula]	0	GO:0043231//intracellular membrane0bounded organelle	GO:0001071//nucleic acid binding transcription factor activity;GO:0044212//transcription regulatory region DNA binding	GO:0006351//transcription, DNA0dependent
Unigene0004493	52.4473	7.70512	-2.76698	5.76214e-254	6.77235e-252	Anthocyanidin 5 30O0glucosyltransferase [Medicago truncatula]	0	0	0	0
Unigene0031928	4.13823	0.608879	-2.76479	5.62038e-12	1.71697e-10	Myocyte0specific enhancer factor 2B [Medicago truncatula]	0	GO:0043231//intracellular membrane0bounded organelle	GO:0001071//nucleic acid binding transcription factor activity;GO:0003677//DNA binding;GO:0046983//protein dimerization activity	GO:0009908//flower development;GO:0006952//defense response;GO:0010074//maintenance of meristem identity;GO:0006351//transcription, DNA0dependent;GO:0007165//signal transduction;GO:0010048//vernalization response;GO:0006606//protein import into nucleus;GO:0048506;GO:0009725//response to hormone stimulus
Unigene0042879	7.80861	1.16034	-2.75052	1.61695e-16	8.78711e-15	lectin [Cicer arietinum]	0	0	0	0
Unigene0003296	5.59818	0.832156	-2.75003	2.35784e-29	1.67509e-27	PREDICTED: RING0H2 finger protein ATL160like [Cicer arietinum]	0	0	GO:0046872//metal ion binding	0
Unigene0015218	3.3145	0.503789	-2.7179	1.05552e-05	0.000134506	PREDICTED: B3 domain0containing protein At2g360800like [Cicer arietinum]	0	GO:0043231//intracellular membrane0bounded organelle	GO:0003676//nucleic acid binding	GO:0006351//transcription, DNA0dependent
Unigene0050511	10.6824	1.62368	-2.7179	2.6055e-10	6.40171e-09	PREDICTED: auxin0induced protein 22E0like [Cicer arietinum]	0	GO:0043231//intracellular membrane0bounded organelle	GO:0005515//protein binding	GO:0009755//hormone0mediated signaling pathway;GO:0006351//transcription, DNA0dependent
Unigene0031178	10.2461	1.56583	-2.71008	5.34872e-46	4.31154e-44	Myb0like protein AA [Medicago truncatula]	0	0	0	0
Unigene0050535	2.69518	0.413379	-2.70484	1.13528e-14	5.75021e-13	0	0	0	0	0
Unigene0021751	11.353	1.77354	-2.67837	1.50783e-17	8.443e-16	Zinc finger CCCH domain0containing protein [Medicago truncatula]	0	0	GO:0043169//cation binding	0
Unigene0058107	3.62141	0.565728	-2.67837	5.89578e-23	3.72066e-21	RNA polymerase beta subunit [Pisum sativum]	ko00230//Purine metabolism;ko00240//Pyrimidine metabolism;ko03020//RNA polymerase	GO:0009536//plastid	GO:0034062//RNA polymerase activity;GO:0003676//nucleic acid binding;GO:0001882//nucleoside binding	GO:0010467//gene expression
Unigene0024110	11.8181	1.85295	-2.67311	1.16032e-66	1.06526e-64	DNA/RNA polymerases superfamily protein [Theobroma cacao]	0	0	GO:0046872//metal ion binding;GO:0003676//nucleic acid binding;GO:0016740//transferase activity	GO:0006259//DNA metabolic process
Unigene0046290	25.9775	4.09954	-2.66372	2.11676e-36	1.61522e-34	0	0	0	0	0
Unigene0033657	5.90342	0.938257	-2.6535	5.29774e-15	2.72869e-13	PREDICTED: methylsterol monooxygenase 1010like [Cicer arietinum]	ko00100//Steroid biosynthesis	0	0	0
Unigene0022643	5.13056	0.816606	-2.6514	1.60547e-26	1.08449e-24	R111 [Coffea arabica]	0	0	0	GO:0009605//response to external stimulus;GO:0000160//two0component signal transduction system (phosphorelay);GO:0006950//response to stress;GO:0010243//response to organic nitrogen
Unigene0045608	75.3088	12.0433	-2.64458	3.27906e-51	2.74426e-49	phenylalanine ammonia lyase [Acacia auriculiformis x Acacia mangium]	ko00940//Phenylpropanoid biosynthesis;ko00360//Phenylalanine metabolism;ko00910//Nitrogen metabolism	GO:0044424//intracellular part	GO:0016841//ammonia0lyase activity	GO:0009699//phenylpropanoid biosynthetic process;GO:0006558//L0phenylalanine metabolic process
Unigene0004951	2.45502	0.392871	-2.64361	6.71124e-16	3.57231e-14	CTP synthase [Medicago truncatula]	ko00240//Pyrimidine metabolism	0	0	0
Unigene0001299	2.11249	0.339437	-2.63773	1.49148e-09	3.36262e-08	PREDICTED: cytochrome P450 94A10like [Cicer arietinum]	0	0	0	0
Unigene0015219	4.5985	0.73889	-2.63773	1.49148e-09	3.36154e-08	PREDICTED: B3 domain0containing protein At2g360800like [Cicer arietinum]	0	0	0	0
Unigene0048452	0.807369	0.129729	-2.63773	2.54474e-05	0.000296501	ferulate 50hydroxylase [Medicago sativa]	ko00940//Phenylpropanoid biosynthesis	0	GO:0046914//transition metal ion binding;GO:0016491//oxidoreductase activity;GO:0046906//tetrapyrrole binding	GO:0044710
Unigene0050211	3.07309	0.495072	-2.63398	1.21947e-12	4.34943e-11	Beta01 30glucanase [Medicago truncatula]	0	GO:0005911//cell0cell junction;GO:0016020//membrane;GO:0005618//cell wall	GO:0016798//hydrolase activity, acting on glycosyl bonds	GO:0044238//primary metabolic process
Unigene0008999	5.12588	0.833841	-2.61996	1.59015e-15	8.32499e-14	NAD(P)H0quinone oxidoreductase subunit H [Medicago truncatula]	ko00190//Oxidative phosphorylation	0	0	0
Unigene0018330	1751.46	288.452	-2.60216	0	0	GDSL esterase/lipase [Medicago truncatula]	0	0	GO:0016787//hydrolase activity	GO:0044238//primary metabolic process
Unigene0013190	2.95807	0.489284	-2.59591	3.93686e-05	0.000440391	cryptochrome 2B apoprotein [Pisum sativum]	ko04712//Circadian rhythm 0 plant	GO:0043231//intracellular membrane0bounded organelle	GO:0046983//protein dimerization activity;GO:0016830//carbon0carbon lyase activity;GO:0009881//photoreceptor activity	GO:0009908//flower development;GO:0042743//hydrogen peroxide metabolic process;GO:0006259//DNA metabolic process;GO:0009606//tropism;GO:0009416//response to light stimulus;GO:0006950//response to stress;GO:0030522//intracellular receptor mediated signaling pathway;GO:0010073//meristem maintenance;GO:0016568//chromatin modification;GO:0007623//circadian rhythm
Unigene0017843	0.868745	0.143696	-2.59591	3.93686e-05	0.000440462	F0box family protein [Medicago truncatula]	0	GO:0043231//intracellular membrane0bounded organelle	0	GO:0009965//leaf morphogenesis;GO:0010051//xylem and phloem pattern formation;GO:0009734//auxin mediated signaling pathway
Unigene0012651	1.03225	0.170742	-2.59591	3.93686e-05	0.000440321	Monoglyceride lipase [Medicago truncatula]	0	0	0	0
Unigene0042675	306.286	50.8907	-2.5894	0	0	dihydroflavonol 40reductase [Medicago sativa]	ko00941//Flavonoid biosynthesis	0	0	0
Unigene0044566	71.0357	11.9537	-2.57109	1.82067e-162	2.02117e-160	phenylalanine ammonia0lyase 2 [Cicer arietinum]	ko00940//Phenylpropanoid biosynthesis;ko00360//Phenylalanine metabolism;ko00910//Nitrogen metabolism	0	0	0
Unigene0062202	2.03265	0.342938	-2.56734	5.59902e-07	8.9647e-06	Ribosomal protein L5 [Medicago truncatula]	ko03010//Ribosome;ko00190//Oxidative phosphorylation;ko05016//Huntington's disease;ko05012//Parkinson's disease;ko05010//Alzheimer's disease;ko00020//Citrate cycle (TCA cycle)	GO:0030529//ribonucleoprotein complex;GO:0009536//plastid	GO:0003723//RNA binding;GO:0005198//structural molecule activity	GO:0010467//gene expression
Unigene0052994	5.54083	0.938576	-2.56156	8.36758e-11	2.18546e-09	PREDICTED: cytochrome P450 83B10like [Cicer arietinum]	0	0	GO:0046914//transition metal ion binding;GO:0016491//oxidoreductase activity;GO:0046906//tetrapyrrole binding	GO:0044710
Unigene0027722	6.75828	1.15062	-2.55425	1.57572e-30	1.13092e-28	30S ribosomal protein S11 [Medicago truncatula]	ko00230//Purine metabolism;ko00240//Pyrimidine metabolism;ko03020//RNA polymerase	GO:0030529//ribonucleoprotein complex;GO:0009536//plastid	GO:0034062//RNA polymerase activity;GO:0003676//nucleic acid binding;GO:0005515//protein binding;GO:0005198//structural molecule activity	GO:0010467//gene expression
Unigene0009961	0.642536	0.1095	-2.55284	6.07482e-05	0.000650069	Vacuolar protein sorting0associated protein 62 [Theobroma cacao]	0	GO:0043231//intracellular membrane0bounded organelle	0	GO:0009725//response to hormone stimulus;GO:0009746;GO:0007165//signal transduction;GO:0034285
Unigene0017860	1.53575	0.261722	-2.55284	6.07482e-05	0.00064997	PREDICTED: reticulocyte0binding protein 20like [Cicer arietinum]	0	0	0	0
Unigene0060372	3.09695	0.527779	-2.55284	8.3569e-09	1.72022e-07	RNA0directed DNA polymerase (Reverse transcriptase) [Medicago truncatula]	0	0	0	0
Unigene0047010	3.08354	0.526432	-2.55027	2.74838e-17	1.52673e-15	Cytochrome P450 [Medicago truncatula]	ko00903//Limonene and pinene degradation;ko00627//Aminobenzoate degradation;ko00945//Stilbenoid, diarylheptanoid and gingerol biosynthesis;ko00624//Polycyclic aromatic hydrocarbon degradation;ko00363//Bisphenol degradation	0	0	0
Unigene0027632	0.216524	0.038053	-2.50845	9.3483e-05	0.000954854	RNA polymerase beta'' subunit [Pisum sativum]	ko00230//Purine metabolism;ko00240//Pyrimidine metabolism;ko03020//RNA polymerase	GO:0009536//plastid;GO:0033178//proton0transporting two0sector ATPase complex, catalytic domain	GO:0032550;GO:0019829//cation0transporting ATPase activity;GO:0015078//hydrogen ion transmembrane transporter activity;GO:0003676//nucleic acid binding;GO:0034062//RNA polymerase activity	GO:0015988//energy coupled proton transport, against electrochemical gradient;GO:0010467//gene expression;GO:0006754//ATP biosynthetic process;GO:0009059//macromolecule biosynthetic process
Unigene0003251	0.904864	0.159025	-2.50845	9.3483e-05	0.000954576	PREDICTED: 120oxophytodienoate reductase 30like [Cicer arietinum]	ko00592//alpha0Linolenic acid metabolism	0	0	0
Unigene0017838	1.98698	0.349202	-2.50845	9.3483e-05	0.000954715	0	0	0	0	0
Unigene0041656	153.763	27.4136	-2.48774	0	0	PREDICTED: auxin0induced protein AUX280like [Glycine max]	0	0	0	0
Unigene0042519	280.009	49.9859	-2.48588	0	0	pherophorin0dz1 protein [Volvox carteri f. nagariensis]	0	0	0	0
Unigene0024556	7.94286	1.4274	-2.47627	2.64092e-74	2.51009e-72	Photosystem I P700 chlorophyll a apoprotein [Medicago truncatula]	ko00195//Photosynthesis	0	0	0
Unigene0018801	6.68234	1.20331	-2.47334	1.08936e-23	7.00079e-22	PREDICTED: O0acyltransferase WSD10like [Cicer arietinum]	0	0	0	0
Unigene0024569	0.646832	0.116592	-2.47192	1.68645e-05	0.000206348	PREDICTED: xyloglucan galactosyltransferase KATAMARI10like [Cicer arietinum]	0	0	0	0
Unigene0043053	45.4421	8.23348	-2.46446	1.83103e-131	1.94927e-129	PREDICTED: BURP domain0containing protein 90like [Cicer arietinum]	0	0	0	0
Unigene0010146	8.4493	1.53733	-2.45841	1.32573e-10	3.39176e-09	lectin [Cicer arietinum]	0	0	GO:0043169//cation binding	0
Unigene0003433	6.29088	1.14507	-2.45782	8.03848e-26	5.36785e-24	salt responsive protein 2 [Solanum lycopersicum]	0	0	0	0
Unigene0041040	10.4603	1.90643	-2.45598	3.73684e-07	6.14465e-06	PREDICTED: IAA0amino acid hydrolase ILR10like 40like [Cicer arietinum]	0	0	GO:0003824//catalytic activity	0
Unigene0048791	3.41383	0.622183	-2.45598	3.73684e-07	6.1432e-06	Expansin [Medicago truncatula]	0	0	0	GO:0071555
Unigene0082480	3.81389	0.697081	-2.45186	3.81476e-23	2.4161e-21	PREDICTED: long chain acyl0CoA synthetase 40like [Cicer arietinum]	ko04146//Peroxisome;ko00071//Fatty acid metabolism;ko03320//PPAR signaling pathway;ko04920//Adipocytokine signaling pathway	0	GO:0003824//catalytic activity	0
Unigene0031915	6.61822	1.21534	-2.44508	5.94416e-28	4.11852e-26	cytochrome c biogenesis protein [Pisum sativum]	0	0	0	0
Unigene0042677	13.8616	2.55334	-2.44063	8.23082e-42	6.4928e-40	GDSL esterase/lipase [Medicago truncatula]	0	0	0	0
Unigene0044237	29.4223	5.47074	-2.4271	1.17787e-47	9.63884e-46	cysteine protease [Vicia sativa]	0	0	0	0
Unigene0043861	148.06	27.7396	-2.41617	1.809e-186	2.05378e-184	hypothetical protein MTR_4g103970 [Medicago truncatula]	0	GO:0043231//intracellular membrane0bounded organelle	0	0
Unigene0033430	22.8483	4.30043	-2.40953	2.63598e-67	2.4232e-65	Zinc finger CCCH domain0containing protein [Medicago truncatula]	0	0	0	0
Unigene0083502	2.1781	0.413827	-2.39597	3.92864e-05	0.000439683	0	0	0	0	0
Unigene0053019	2.35171	0.45382	-2.37352	1.31364e-06	1.9836e-05	SOUL30like protein [Chlamydomonas reinhardtii]	0	GO:0043231//intracellular membrane0bounded organelle	0	0
Unigene0054091	2.84346	0.548715	-2.37352	1.31364e-06	1.98317e-05	0	0	0	0	0
Unigene0030710	1.78038	0.34526	-2.36643	2.0153e-10	5.02205e-09	copia0type polyprotein [Glycine max]	0	0	GO:0005488//binding	0
Unigene0051536	12.0743	2.3655	-2.35172	5.0853e-14	2.455e-12	pherophorin0dz1 protein [Volvox carteri f. nagariensis]	0	0	0	0
Unigene0024502	429.835	84.2375	-2.35125	0	0	Cell wall0associated hydrolase, partial [Medicago truncatula]	0	0	0	0
Unigene0046742	4.64694	0.916968	-2.34134	4.00176e-13	1.64025e-11	PREDICTED: thaumatin0like protein 1a0like [Glycine max]	0	0	0	0
Unigene0050042	19.9396	3.94145	-2.33884	2.68444e-53	2.28484e-51	PREDICTED: anthocyanin 3'0O0beta0glucosyltransferase0like [Cicer arietinum]	0	0	GO:0016757//transferase activity, transferring glycosyl groups;GO:0005488//binding	0
Unigene0005616	29.8982	5.92232	-2.33582	2.41718e-68	2.23674e-66	PREDICTED: serine/threonine0protein kinase HT10like [Cicer arietinum]	0	0	0	0
Unigene0040189	6.92406	1.38311	-2.32371	4.19674e-20	2.49345e-18	0	0	0	0	0
Unigene0041552	292.28	58.4273	-2.32264	0	0	Os04g0560700 [Oryza sativa Japonica Group]	0	0	0	0
Unigene0010623	27.7535	5.56234	-2.31891	6.15244e-143	6.66109e-141	H+0transporting two0sector ATPase, alpha/beta subunit, central region; H+0transporting two0sector ATPase, delta/epsilon subunit [Medicago truncatula]	ko00190//Oxidative phosphorylation;ko00195//Photosynthesis	GO:0033178//proton0transporting two0sector ATPase complex, catalytic domain;GO:0009534//chloroplast thylakoid	GO:0032550;GO:0019829//cation0transporting ATPase activity;GO:0015078//hydrogen ion transmembrane transporter activity	GO:0015988//energy coupled proton transport, against electrochemical gradient;GO:0015986//ATP synthesis coupled proton transport
Unigene0049961	3.2115	0.645033	-2.3158	9.05286e-05	0.000927382	DNA topoisomerase, partial [Medicago truncatula]	0	0	0	0
Unigene0058230	3.04946	0.612487	-2.3158	1.22455e-15	6.43982e-14	NAD(P)H0quinone oxidoreductase subunit K [Medicago truncatula]	ko00190//Oxidative phosphorylation	0	GO:0051536//iron0sulfur cluster binding;GO:0048037//cofactor binding;GO:0050136//NADH dehydrogenase (quinone) activity	GO:0044710
Unigene0034061	1001.55	202.106	-2.30905	0	0	cell wall protein, partial [Helianthus annuus]	0	0	0	0
Unigene0003146	1.09321	0.224927	-2.28104	2.4745e-05	0.000289328	Chloride channel protein CLC0c [Medicago truncatula]	0	GO:0000325//plant0type vacuole;GO:0031090//organelle membrane;GO:0031224//intrinsic to membrane	GO:0005254//chloride channel activity;GO:0017076//purine nucleotide binding	GO:0015698//inorganic anion transport;GO:0044763
Unigene0010494	4.19199	0.862502	-2.28104	1.12115e-13	5.13976e-12	cytochrome c oxidase subunit 2 (mitochondrion) [Lotus japonicus]	ko00190//Oxidative phosphorylation;ko05016//Huntington's disease;ko05012//Parkinson's disease;ko05010//Alzheimer's disease;ko04260//Cardiac muscle contraction	0	0	0
Unigene0047813	7.14788	1.47068	-2.28104	1.12115e-13	5.1364e-12	PREDICTED: homeobox0leucine zipper protein HAT50like [Cicer arietinum]	0	0	0	0
Unigene0012306	5.08308	1.04904	-2.27663	3.0603e-12	1.00033e-10	ripening0related protein0like [Vitis vinifera]	0	0	GO:0003824//catalytic activity	0
Unigene0033683	1.56879	0.328501	-2.25568	6.81722e-06	9.02721e-05	PREDICTED: transducin beta0like protein 30like [Cicer arietinum]	ko03008//Ribosome biogenesis in eukaryotes	0	0	0
Unigene0015454	1.60772	0.337371	-2.25261	6.58342e-08	1.20881e-06	0	0	0	0	0
Unigene0004453	0.947294	0.199778	-2.24541	3.7247e-05	0.000418664	PREDICTED: poly(rC)0binding protein 30like [Cicer arietinum]	0	GO:0043231//intracellular membrane0bounded organelle	GO:0003676//nucleic acid binding	GO:0009908//flower development
Unigene0045162	27.508	5.81617	-2.24171	2.62656e-77	2.53078e-75	ER glycerol0phosphate acyltransferase [Medicago truncatula]	ko00564//Glycerophospholipid metabolism;ko00561//Glycerolipid metabolism	GO:0043231//intracellular membrane0bounded organelle	GO:0008374//O0acyltransferase activity;GO:0042578//phosphoric ester hydrolase activity	GO:0009059//macromolecule biosynthetic process;GO:0046471//phosphatidylglycerol metabolic process;GO:0009791//post0embryonic development
Unigene0015931	2.48409	0.525757	-2.24025	1.8845e-10	4.7196e-09	PREDICTED: formamidase0like isoform X1 [Cicer arietinum]	ko00630//Glyoxylate and dicarboxylate metabolism;ko00910//Nitrogen metabolism	GO:0043231//intracellular membrane0bounded organelle	GO:0016811//hydrolase activity, acting on carbon0nitrogen (but not peptide) bonds, in linear amides	0
Unigene0048816	8.5191	1.80792	-2.23637	1.88981e-06	2.76481e-05	Serine hydroxymethyltransferase, partial [Medicago truncatula]	ko00680//Methane metabolism;ko00260//Glycine, serine and threonine metabolism;ko00460//Cyanoamino acid metabolism;ko00670//One carbon pool by folate	GO:0005911//cell0cell junction;GO:0044444//cytoplasmic part;GO:0016020//membrane	GO:0016742//hydroxymethyl0, formyl0 and related transferase activity;GO:0043168	GO:0009069//serine family amino acid metabolic process;GO:0006730//one0carbon metabolic process;GO:0010038//response to metal ion
Unigene0042790	236.623	50.7339	-2.22157	0	0	Cytochrome B5 [Medicago truncatula]	0	0	GO:0043169//cation binding;GO:0046906//tetrapyrrole binding	GO:0006952//defense response;GO:0008610//lipid biosynthetic process;GO:1901362
Unigene0040427	6.73641	1.44474	-2.22116	5.26506e-07	8.46482e-06	PREDICTED: beta0glucosidase 110like [Cicer arietinum]	0	GO:0044439;GO:0031224//intrinsic to membrane	GO:0016812//hydrolase activity, acting on carbon0nitrogen (but not peptide) bonds, in cyclic amides;GO:0016798//hydrolase activity, acting on glycosyl bonds	GO:0009112;GO:0044282
Unigene0009286	1.4222	0.307623	-2.20889	5.59098e-05	0.000603641	PREDICTED: isoflavone reductase homolog A6220like isoform X1 [Cicer arietinum]	0	0	0	0
Unigene0018666	128.698	28.1061	-2.19504	0	0	Phenylalanine ammonia0lyase [Medicago truncatula]	ko00940//Phenylpropanoid biosynthesis;ko00360//Phenylalanine metabolism;ko00910//Nitrogen metabolism	0	0	0
Unigene0032926	16.5622	3.67669	-2.17141	1.37237e-207	1.5708e-205	PetA, partial (chloroplast) [Galearia maingayi]	ko00195//Photosynthesis	0	0	0
Unigene0006614	1.92042	0.428576	-2.1638	3.2712e-07	5.4184e-06	Inositol monophosphatase family protein isoform 1 [Theobroma cacao]	ko00920//Sulfur metabolism	0	0	0
Unigene0048638	9.3866	2.11975	-2.14671	2.44322e-19	1.43098e-17	Homeobox0leucine zipper protein ATHB07 [Medicago truncatula]	0	GO:0043231//intracellular membrane0bounded organelle	GO:0001071//nucleic acid binding transcription factor activity;GO:0044212//transcription regulatory region DNA binding	GO:0006351//transcription, DNA0dependent
Unigene0025730	369.87	83.5386	-2.1465	0	0	Germin0like protein [Pisum sativum]	0	0	0	0
Unigene0024554	9.18082	2.07538	-2.14525	4.46348e-25	2.94964e-23	Photosystem I P700 chlorophyll a apoprotein [Medicago truncatula]	ko00195//Photosynthesis	0	0	0
Unigene0018630	3.50849	0.793781	-2.14404	2.04784e-09	4.5424e-08	Male sterility 5 family protein [Medicago truncatula]	0	0	0	0
Unigene0041273	837.472	189.903	-2.14078	0	0	Cold and drought0regulated protein CORA [Medicago truncatula]	0	0	0	0
Unigene0002003	3.21408	0.730993	-2.13648	1.35963e-07	2.38639e-06	PREDICTED: probable mannitol dehydrogenase0like [Cicer arietinum]	0	0	0	0
Unigene0049571	13.4599	3.06123	-2.13648	1.35963e-07	2.38699e-06	0	0	0	0	0
Unigene0050666	2.00525	0.458956	-2.12736	3.40428e-05	0.000385868	Glycosyltransferase CAZy family GT8 [Medicago truncatula]	0	0	GO:0016740//transferase activity	0
Unigene0004881	15.0713	3.45133	-2.12658	1.19745e-25	7.98099e-24	hypothetical protein MTR_4g131720 [Medicago truncatula]	0	0	0	0
Unigene0018667	54.3795	12.4785	-2.12362	3.16498e-282	3.74499e-280	Phenylalanine ammonia0lyase [Medicago truncatula]	ko00940//Phenylpropanoid biosynthesis;ko00360//Phenylalanine metabolism;ko00910//Nitrogen metabolism	0	0	0
Unigene0047946	3.83605	0.880543	-2.12316	9.36012e-06	0.000120416	GDSL esterase/lipase [Medicago truncatula]	0	0	0	0
Unigene0004725	46.0421	10.6339	-2.11428	4.39814e-159	4.87477e-157	Phosphoethanolamine N0methyltransferase [Medicago truncatula]	ko00564//Glycerophospholipid metabolism	0	0	0
Unigene0041790	34.6228	8.00188	-2.11331	7.25602e-48	5.95172e-46	hypothetical protein MTR_4g082900 [Medicago truncatula]	0	0	0	0
Unigene0008277	19.0211	4.39986	-2.11207	8.73448e-37	6.67221e-35	PREDICTED: dehydration0responsive element0binding protein 30like [Cicer arietinum]	0	GO:0043231//intracellular membrane0bounded organelle	GO:0003676//nucleic acid binding;GO:0001071//nucleic acid binding transcription factor activity	GO:0006351//transcription, DNA0dependent
Unigene0005215	11.2002	2.59363	-2.11048	7.19894e-17	3.95513e-15	Ethylene0responsive transcription factor SHINE [Medicago truncatula]	0	0	0	0
Unigene0024833	9.53814	2.21453	-2.10671	2.898e-11	7.91431e-10	protein EXORDIUM like 2 [Arabidopsis thaliana]	0	0	0	0
Unigene0043177	11.8141	2.754	-2.1009	2.77798e-36	2.11746e-34	Stearoyl acyl carrier protein desaturase [Medicago truncatula]	ko01040//Biosynthesis of unsaturated fatty acids;ko00061//Fatty acid biosynthesis	0	0	0
Unigene0045229	20.4554	4.77731	-2.09821	1.39764e-28	9.79034e-27	PREDICTED: O0acyltransferase WSD10like [Cicer arietinum]	0	0	GO:0016411//acylglycerol O0acyltransferase activity	GO:0008610//lipid biosynthetic process
Unigene0007640	5.97732	1.40064	-2.09341	5.29922e-10	1.25577e-08	Cell cycle progression protein 1 [Theobroma cacao]	0	GO:0009521;GO:0009536//plastid	GO:0005515//protein binding	GO:0044237//cellular metabolic process
Unigene0034004	7.78535	1.82431	-2.09341	1.87113e-09	4.16628e-08	PREDICTED: limonoid UDP0glucosyltransferase0like [Cicer arietinum]	0	0	GO:0016758//transferase activity, transferring hexosyl groups	0
Unigene0086029	2.9827	0.698925	-2.09341	2.97902e-07	4.97325e-06	Proteasome inhibitor0related [Theobroma cacao]	0	0	0	0
Unigene0048020	17.9288	4.26895	-2.07033	1.95984e-23	1.24918e-21	PREDICTED: auxin0induced protein 22D0like isoform X2 [Cicer arietinum]	0	GO:0043231//intracellular membrane0bounded organelle	GO:0005515//protein binding	GO:0009755//hormone0mediated signaling pathway;GO:0006351//transcription, DNA0dependent
Unigene0047711	11.1626	2.66729	-2.06523	1.46312e-59	1.29734e-57	Inter0alpha0trypsin inhibitor heavy chain H4 [Medicago truncatula]	0	0	0	0
Unigene0084132	4.22202	1.01681	-2.05388	2.10616e-20	1.26098e-18	calmodulin0binding protein0like protein [Arabidopsis thaliana]	0	0	0	0
Unigene0005768	10.4087	2.5177	-2.04761	1.68728e-09	3.77491e-08	PREDICTED: serine/threonine0protein kinase HT10like [Cicer arietinum]	0	0	0	0
Unigene0084014	34.3254	8.3058	-2.04709	2.2711e-137	2.44e-135	Acetyl0coenzyme A synthetase [Medicago truncatula]	0	0	0	0
Unigene0049780	12.3354	2.98731	-2.04588	1.0698e-19	6.30262e-18	ribosomal protein S8 [Pisum sativum]	ko03010//Ribosome	GO:0030529//ribonucleoprotein complex;GO:0009536//plastid	GO:0003723//RNA binding;GO:0005198//structural molecule activity	GO:0010467//gene expression
Unigene0048701	21.4582	5.21659	-2.04035	1.21802e-31	8.81413e-30	PREDICTED: limonoid UDP0glucosyltransferase0like [Cicer arietinum]	ko00940//Phenylpropanoid biosynthesis	0	GO:0016757//transferase activity, transferring glycosyl groups	0
Unigene0009479	1.27892	0.311212	-2.03896	8.35996e-06	0.000108647	PREDICTED: protein kinase APK1B, chloroplastic0like isoform X5 [Cicer arietinum]	0	0	GO:0004672//protein kinase activity;GO:0032550	GO:0006464//protein modification process
Unigene0046840	33.6363	8.21906	-2.03297	7.7756e-34	5.77596e-32	Serine hydroxymethyltransferase [Medicago truncatula]	ko00680//Methane metabolism;ko00260//Glycine, serine and threonine metabolism;ko00460//Cyanoamino acid metabolism;ko00670//One carbon pool by folate	0	GO:0016742//hydroxymethyl0, formyl0 and related transferase activity;GO:0043168	GO:0009069//serine family amino acid metabolic process;GO:0006730//one0carbon metabolic process
Unigene0006211	0.772255	0.188828	-2.03201	3.028e-05	0.000346696	PREDICTED: tetratricopeptide repeat protein 7B0like isoform X1 [Cicer arietinum]	0	GO:0043231//intracellular membrane0bounded organelle	GO:0005515//protein binding;GO:0003824//catalytic activity	GO:0016129
Unigene0049230	13.8269	3.38086	-2.03201	2.36742e-11	6.55994e-10	ribosomal protein S14 [Pisum sativum]	ko03010//Ribosome	GO:0030529//ribonucleoprotein complex;GO:0009536//plastid	GO:0003723//RNA binding;GO:0005198//structural molecule activity	GO:0010467//gene expression
Unigene0053141	3.2478	0.794134	-2.03201	3.028e-05	0.000346752	PREDICTED: probable protein phosphatase 2C 380like isoform X1 [Cicer arietinum]	0	GO:0043231//intracellular membrane0bounded organelle	GO:0043169//cation binding;GO:0004721//phosphoprotein phosphatase activity	GO:0006464//protein modification process
Unigene0041309	80.9259	19.8528	-2.02726	3.4723e-60	3.09454e-58	dormancy0associated protein [Pisum sativum]	ko03040//Spliceosome	0	0	0
Unigene0002069	2.96641	0.728209	-2.0263	9.57216e-18	5.40306e-16	PREDICTED: homeobox0leucine zipper protein HDG110like [Cicer arietinum]	0	GO:0043231//intracellular membrane0bounded organelle	GO:0044212//transcription regulatory region DNA binding;GO:0001071//nucleic acid binding transcription factor activity	GO:0006351//transcription, DNA0dependent;GO:0000904//cell morphogenesis involved in differentiation
Unigene0046718	9.31769	2.28806	-2.02585	9.96228e-52	8.37752e-50	PREDICTED: probable linoleate 9S0lipoxygenase 50like [Cicer arietinum]	ko00592//alpha0Linolenic acid metabolism;ko00591//Linoleic acid metabolism	0	GO:0046914//transition metal ion binding;GO:0016702//oxidoreductase activity, acting on single donors with incorporation of molecular oxygen, incorporation of two atoms of oxygen;GO:0016740//transferase activity	GO:0006633//fatty acid biosynthetic process
Unigene0034249	1657.3	407.242	-2.02488	0	0	Non0specific lipid0transfer protein [Medicago truncatula]	0	0	GO:0005488//binding	GO:0051234//establishment of localization;GO:0010876
Unigene0003461	12.9509	3.21324	-2.01095	3.9107e-07	6.41097e-06	0	0	0	0	0
Unigene0051284	6.47059	1.61943	-1.99841	1.24888e-17	7.02674e-16	Os06g0700300 [Oryza sativa Japonica Group]	0	0	0	0
Unigene0050069	6.99551	1.75632	-1.99387	5.2434e-18	2.98129e-16	PREDICTED: uncharacterized LOC101221941 [Cucumis sativus]	0	0	GO:0016741	GO:0005982//starch metabolic process;GO:0005984//disaccharide metabolic process;GO:0009451//RNA modification
Unigene0061030	2.61583	0.658701	-1.98957	5.72518e-07	9.15415e-06	PREDICTED: uncharacterized membrane protein YMR155W0like [Cicer arietinum]	0	0	0	0
Unigene0047468	18.1433	4.60694	-1.97756	1.87683e-26	1.26535e-24	PREDICTED: LOW QUALITY PROTEIN: basic blue protein0like [Glycine max]	0	0	0	0
Unigene0045754	57.7695	14.7068	-1.97383	4.16422e-62	3.75418e-60	PREDICTED: lipoxygenase homology domain0containing protein 10like [Cicer arietinum]	0	0	0	0
Unigene0024555	0.726834	0.1858	-1.96788	6.53292e-05	0.00069316	Photosystem I P700 chlorophyll a apoprotein [Medicago truncatula]	ko00195//Photosynthesis	0	0	0
Unigene0036304	5.35179	1.36807	-1.96788	8.36444e-07	1.30698e-05	0	0	0	0	0
Unigene0049940	8.4188	2.16521	-1.95911	5.57648e-15	2.86383e-13	acetyl0CoA carboxylase beta subunit [Pisum sativum]	0	GO:0009532//plastid stroma;GO:0043234//protein complex;GO:0009528//plastid inner membrane	GO:0046914//transition metal ion binding;GO:0032550;GO:0016421//CoA carboxylase activity	GO:0015937//coenzyme A biosynthetic process;GO:0006631//fatty acid metabolic process
Unigene0007480	21.4415	5.55317	-1.94902	9.47232e-11	2.46298e-09	Dihydroflavonol040reductase [Medicago truncatula]	0	0	GO:0048037//cofactor binding	GO:0008152//metabolic process
Unigene0038958	2.50112	0.649195	-1.94585	1.21949e-06	1.85382e-05	Retrotransposon gag protein [Medicago truncatula]	0	0	GO:0005488//binding	0
Unigene0047297	17.6956	4.5931	-1.94585	4.69002e-12	1.45561e-10	PREDICTED: serine hydroxymethyltransferase 10like [Cicer arietinum]	ko00680//Methane metabolism;ko00260//Glycine, serine and threonine metabolism;ko00460//Cyanoamino acid metabolism;ko00670//One carbon pool by folate	0	0	0
Unigene0082964	5.33871	1.38646	-1.94509	2.8087e-14	1.38749e-12	NAK0type protein kinase [Medicago truncatula]	0	0	0	0
Unigene0022744	7.54445	1.98346	-1.9274	2.3697e-11	6.56367e-10	NTH1 [Pisum sativum]	0	0	GO:0070011	GO:0019538//protein metabolic process
Unigene0048877	5.80199	1.5295	-1.92348	1.77413e-06	2.60755e-05	PREDICTED: probably inactive leucine0rich repeat receptor0like protein kinase At5g483800like isoform X1 [Cicer arietinum]	0	GO:0031224//intrinsic to membrane	GO:0016301//kinase activity;GO:0032550	GO:0006796//phosphate0containing compound metabolic process;GO:0006464//protein modification process
Unigene0054962	2.55669	0.673988	-1.92348	3.84854e-05	0.000431407	integrase core domain containing protein [Phaseolus vulgaris]	0	0	0	0
Unigene0053728	4.0056	1.07665	-1.89547	3.5545e-12	1.13694e-10	photosystem II protein D2 [Parthenium argentatum]	ko00195//Photosynthesis	GO:0031224//intrinsic to membrane;GO:0009521;GO:0009534//chloroplast thylakoid	GO:0046906//tetrapyrrole binding;GO:0046914//transition metal ion binding;GO:0009055//electron carrier activity;GO:0003824//catalytic activity	GO:0009767//photosynthetic electron transport chain;GO:0006464//protein modification process
Unigene0049136	8.16252	2.19756	-1.89311	5.59866e-05	0.000604377	aldehyde oxidase 1 [Pisum sativum]	ko00906//Carotenoid biosynthesis	GO:0043231//intracellular membrane0bounded organelle;GO:0044444//cytoplasmic part	GO:0046914//transition metal ion binding;GO:0004029//aldehyde dehydrogenase (NAD) activity;GO:0004031//aldehyde oxidase activity;GO:0051536//iron0sulfur cluster binding;GO:0000166//nucleotide binding	GO:0019757
Unigene0054258	2.38327	0.644381	-1.88696	2.26128e-05	0.000266937	ATPase E10E2 type family protein / haloacid dehalogenase0like hydrolase family protein isoform 3 [Theobroma cacao]	0	0	0	0
Unigene0031864	26.2192	7.09591	-1.88556	3.64726e-66	3.34407e-64	PREDICTED: GDSL esterase/lipase At1g296700like [Cicer arietinum]	0	0	GO:0016787//hydrolase activity	GO:0044238//primary metabolic process
Unigene0037878	479.638	130.763	-1.87499	8.9794e-223	1.04311e-220	dormancy0associated protein [Pisum sativum]	0	0	0	0
Unigene0040921	1873.72	519.94	-1.84949	0	0	PREDICTED: alpha0dioxygenase 10like [Cicer arietinum]	ko00592//alpha0Linolenic acid metabolism	0	GO:0046906//tetrapyrrole binding;GO:0016702//oxidoreductase activity, acting on single donors with incorporation of molecular oxygen, incorporation of two atoms of oxygen;GO:0016209//antioxidant activity	GO:0034614//cellular response to reactive oxygen species;GO:0010035//response to inorganic substance;GO:0009725//response to hormone stimulus;GO:0009267//cellular response to starvation;GO:0016265//death;GO:0009751//response to salicylic acid stimulus;GO:0000041//transition metal ion transport;GO:0009062//fatty acid catabolic process;GO:0015698//inorganic anion transport;GO:0009827//plant0type ce…
Unigene0048555	9.87995	2.77816	-1.83037	6.7609e-14	3.23714e-12	CTV.20 [Citrus trifoliata]	ko04111//Cell cycle 0 yeast	0	0	0
Unigene0002495	5.04045	1.41733	-1.83037	5.41668e-12	1.65836e-10	PREDICTED: uncharacterized LOC101219072 [Cucumis sativus]	0	0	GO:0005488//binding	0
Unigene0046492	7.09306	1.99451	-1.83037	2.57464e-09	5.65186e-08	Contains weak similarity to LIP1 gene product gi|7297743 from Drosophila melanogaster genomic sequence gb|AE003629 and is a member of the Phosphoglycerate mutase PF|00300 family. ESTs gb|N38556, gb|Z25988, gb|Z18409 come from this gene [Arabidopsis thaliana]	0	0	0	0
Unigene0039644	4934.47	1401.01	-1.81642	0	0	dormancy0associated protein [Pisum sativum]	0	0	0	0
Unigene0044893	45.8122	13.0181	-1.81521	7.53864e-58	6.6341e-56	cysteine protease [Vicia sativa]	0	0	0	0
Unigene0086779	2.24932	0.640495	-1.81223	3.11256e-07	5.17276e-06	Phytoene synthase [Medicago truncatula]	ko00906//Carotenoid biosynthesis	0	0	0
Unigene0050299	4.14108	1.18017	-1.81101	7.59266e-07	1.19251e-05	PREDICTED: leucine0rich repeat extensin0like protein 30like [Cicer arietinum]	0	0	0	0
Unigene0049290	2.07265	0.591259	-1.80962	1.85594e-06	2.7181e-05	PREDICTED: regulatory protein NPR50like [Cicer arietinum]	0	0	0	0
Unigene0020511	31.743	9.09522	-1.80326	2.77168e-106	2.8385e-104	PREDICTED: squamosa promoter0binding0like protein 180like [Cicer arietinum]	0	0	0	0
Unigene0043897	45.0602	12.9906	-1.79438	7.68456e-51	6.42358e-49	ER glycerol0phosphate acyltransferase [Medicago truncatula]	ko00564//Glycerophospholipid metabolism;ko00561//Glycerolipid metabolism	GO:0043231//intracellular membrane0bounded organelle	GO:0008374//O0acyltransferase activity;GO:0042578//phosphoric ester hydrolase activity	GO:0009059//macromolecule biosynthetic process;GO:0046471//phosphatidylglycerol metabolic process;GO:0009791//post0embryonic development
Unigene0001983	2.62823	0.759285	-1.79138	1.08789e-06	1.66789e-05	PREDICTED: LOB domain0containing protein 370like [Cicer arietinum]	0	0	0	GO:0008152//metabolic process;GO:0009965//leaf morphogenesis
Unigene0048756	6.99566	2.02101	-1.79138	1.08789e-06	1.66752e-05	Zinc finger protein0like protein [Medicago truncatula]	0	0	GO:0003824//catalytic activity;GO:0046914//transition metal ion binding	0
Unigene0083701	6.64936	1.93119	-1.78372	5.45304e-17	3.02199e-15	Gibberellin 20oxidase [Medicago truncatula]	0	0	0	0
Unigene0046458	29.2652	8.50755	-1.78237	7.63976e-21	4.62939e-19	PREDICTED: transcription factor bHLH1500like [Cucumis sativus]	0	0	0	0
Unigene0043069	37.5981	10.9419	-1.78079	2.25102e-53	1.92061e-51	vegetative lectin [Pisum sativum]	0	0	0	0
Unigene0081894	3.17776	0.927278	-1.77694	3.95126e-05	0.00044165	0	0	0	0	0
Unigene0042943	17.9696	5.24766	-1.77581	2.73e-35	2.06071e-33	PREDICTED: adenine phosphoribosyltransferase 1, chloroplastic0like [Cicer arietinum]	ko00230//Purine metabolism	GO:0044444//cytoplasmic part	GO:0016763//transferase activity, transferring pentosyl groups	GO:0043096//purine base salvage
Unigene0049537	3.13556	0.928096	-1.75637	2.29248e-05	0.000270074	0	0	0	0	0
Unigene0048356	16.206	4.83109	-1.74611	1.75636e-48	1.44234e-46	PREDICTED: coumaroyl0CoA:anthocyanidin 30O0glucoside06''0O0coumaroyltransferase 10like [Cicer arietinum]	0	0	0	0
Unigene0048168	3.07908	0.922584	-1.73874	1.33051e-05	0.000166045	PREDICTED: probable methyltransferase PMT150like [Cicer arietinum]	0	GO:0043231//intracellular membrane0bounded organelle	GO:0016740//transferase activity	0
Unigene0014719	3.46853	1.04201	-1.73496	1.29067e-09	2.93254e-08	White0brown0complex ABC transporter family [Medicago truncatula]	0	0	GO:0017111//nucleoside0triphosphatase activity;GO:0032550	GO:0009154
Unigene0006095	3.52225	1.06117	-1.73084	3.10728e-07	5.16521e-06	PREDICTED: EPIDERMAL PATTERNING FACTOR0like protein 50like [Cicer arietinum]	0	0	0	0
Unigene0018010	10.0764	3.03898	-1.72932	1.25556e-23	8.04673e-22	Naringenin,20oxoglutarate 30dioxygenase [Medicago truncatula]	ko00941//Flavonoid biosynthesis	0	GO:0016706//oxidoreductase activity, acting on paired donors, with incorporation or reduction of molecular oxygen, 20oxoglutarate as one donor, and incorporation of one atom each of oxygen into both donors	GO:0044710
Unigene0036956	4.60504	1.39646	-1.72144	8.06728e-05	0.000837192	PREDICTED: cytochrome P450 71A240like [Cicer arietinum]	0	0	GO:0016709//oxidoreductase activity, acting on paired donors, with incorporation or reduction of molecular oxygen, NADH or NADPH as one donor, and incorporation of one atom of oxygen;GO:0046872//metal ion binding	0
Unigene0049336	8.38878	2.54649	-1.71995	1.1783e-13	5.38414e-12	PREDICTED: fasciclin0like arabinogalactan protein 130like [Cicer arietinum]	0	GO:0031225//anchored to membrane;GO:0005911//cell0cell junction;GO:0005618//cell wall;GO:0043231//intracellular membrane0bounded organelle	0	0
Unigene0052361	1.44688	0.444993	-1.70109	1.09692e-05	0.000139326	epsin N0terminal homology (ENTH) domain0containing protein [Medicago truncatula]	0	GO:0030117//membrane coat	GO:0035091//phosphatidylinositol binding;GO:0005515//protein binding	GO:0006901//vesicle coating
Unigene0043355	87.6051	26.9624	-1.70007	3.20726e-56	2.79783e-54	glycine0rich protein [Citrus unshiu]	0	0	0	0
Unigene0024613	17.6646	5.46697	-1.69205	3.21376e-12	1.03982e-10	PsAD2 [Pisum sativum]	0	0	0	0
Unigene0050285	6.07719	1.88131	-1.69167	8.80566e-09	1.80623e-07	PREDICTED: DNA excision repair protein ERCC010like [Cicer arietinum]	0	0	GO:0046914//transition metal ion binding	0
Unigene0024023	113.349	35.7706	-1.66393	3.68408e-129	3.90418e-127	PREDICTED: protein TRANSPARENT TESTA 120like [Cicer arietinum]	0	GO:0000325//plant0type vacuole;GO:0016020//membrane	GO:0015078//hydrogen ion transmembrane transporter activity;GO:0015291//secondary active transmembrane transporter activity	GO:0015851//nucleobase transport;GO:0015893//drug transport;GO:0044763;GO:0009699//phenylpropanoid biosynthetic process;GO:0009737//response to abscisic acid stimulus
Unigene0003635	30.4499	9.6461	-1.65842	1.89792e-53	1.62131e-51	YABBY protein [Medicago truncatula]	0	GO:0043231//intracellular membrane0bounded organelle	GO:0001071//nucleic acid binding transcription factor activity	GO:0006412//translation;GO:0048869;GO:0009887//organ morphogenesis;GO:0006351//transcription, DNA0dependent;GO:0006325//chromatin organization
Unigene0008923	624.818	199.154	-1.64955	5.44864e-288	6.45807e-286	PREDICTED: GDSL esterase/lipase At5g333700like [Glycine max]	0	0	0	0
Unigene0081696	8.41187	2.68187	-1.64918	1.01975e-117	1.06141e-115	hypothetical chloroplast RF1 [Medicago truncatula]	0	0	0	0
Unigene0018584	115.115	36.888	-1.64186	1.4645e-210	1.68175e-208	PREDICTED: short0chain type dehydrogenase/reductase0like [Cicer arietinum]	ko01040//Biosynthesis of unsaturated fatty acids;ko00061//Fatty acid biosynthesis	0	0	0
Unigene0043347	39.082	12.5451	-1.63938	1.13003e-15	5.96067e-14	expansin0A50like precursor [Cicer arietinum]	0	0	0	0
Unigene0047456	9.48545	3.06075	-1.63183	2.86072e-09	6.24075e-08	PREDICTED: transcription activator GLK20like [Cicer arietinum]	0	0	0	0
Unigene0047509	38.1145	12.3347	-1.62762	1.37961e-26	9.3282e-25	Limonoid UDP0glucosyltransferase [Medicago truncatula]	0	0	0	0
Unigene0008805	33.4279	10.8457	-1.62392	3.15326e-37	2.41402e-35	ripening0related protein [Pisum sativum]	0	0	0	0
Unigene0046353	8.27618	2.68522	-1.62392	1.78356e-05	0.000216565	Malate dehydrogenase [Medicago truncatula]	ko00620//Pyruvate metabolism;ko00710//Carbon fixation in photosynthetic organisms;ko00020//Citrate cycle (TCA cycle);ko00630//Glyoxylate and dicarboxylate metabolism	0	0	0
Unigene0049862	4.08975	1.33102	-1.61948	2.81584e-08	5.42931e-07	Ethylene0responsive transcription factor [Medicago truncatula]	0	GO:0043231//intracellular membrane0bounded organelle	GO:0003676//nucleic acid binding;GO:0001071//nucleic acid binding transcription factor activity	GO:0006351//transcription, DNA0dependent
Unigene0082671	26.4127	8.60684	-1.61768	6.31618e-26	4.22581e-24	PREDICTED: cyclin0dependent kinase 120like [Cicer arietinum]	0	0	0	0
Unigene0048773	6.07247	1.98293	-1.61465	2.8156e-11	7.69828e-10	PREDICTED: anthocyanidin 5,30O0glucosyltransferase0like [Cicer arietinum]	0	0	0	0
Unigene0042507	130.859	42.7531	-1.61391	3.9621e-74	3.75563e-72	0	0	0	0	0
Unigene0036631	101.089	33.0448	-1.61313	8.32318e-55	7.18018e-53	Chalcone synthase [Medicago truncatula]	ko04712//Circadian rhythm 0 plant;ko00941//Flavonoid biosynthesis	0	GO:0046983//protein dimerization activity;GO:0016747//transferase activity, transferring acyl groups other than amino0acyl groups	GO:0008152//metabolic process
Unigene0022448	4.04715	1.32769	-1.60798	4.34656e-05	0.000481607	PREDICTED: protein0lysine methyltransferase METTL21A0like [Cicer arietinum]	0	0	0	0
Unigene0041487	90.492	29.7361	-1.60557	0	0	PREDICTED: linoleate 13S0lipoxygenase 201, chloroplastic0like [Cicer arietinum]	ko00592//alpha0Linolenic acid metabolism;ko00591//Linoleic acid metabolism	0	GO:0046914//transition metal ion binding;GO:0016702//oxidoreductase activity, acting on single donors with incorporation of molecular oxygen, incorporation of two atoms of oxygen	GO:0006633//fatty acid biosynthetic process
Unigene0017452	610.035	200.546	-1.60496	0	0	Non0specific lipid0transfer protein [Medicago truncatula]	0	0	0	0
Unigene0051208	4.77447	1.57459	-1.60037	1.99463e-06	2.90059e-05	PREDICTED: RING0H2 finger protein ATL470like isoform X2 [Cicer arietinum]	0	GO:0043231//intracellular membrane0bounded organelle;GO:0031224//intrinsic to membrane	GO:0046914//transition metal ion binding;GO:0016301//kinase activity;GO:0032550	GO:0006464//protein modification process
Unigene0012793	12.1593	4.01833	-1.5974	8.53602e-32	6.20913e-30	PREDICTED: probable protein phosphatase 2C 630like isoform X2 [Cicer arietinum]	0	0	GO:0004721//phosphoprotein phosphatase activity;GO:0043169//cation binding	GO:0006464//protein modification process
Unigene0002059	3.91906	1.29954	-1.59251	5.49138e-08	1.0206e-06	TBC1 domain family member [Medicago truncatula]	0	0	0	0
Unigene0023086	8.5435	2.83612	-1.59091	8.33094e-06	0.000108451	PREDICTED: uncharacterized protein LOC101508391 [Cicer arietinum]	0	0	0	0
Unigene0048899	11.0367	3.66458	-1.5906	2.53098e-18	1.45084e-16	Gibberellin receptor GID1 [Medicago truncatula]	0	0	0	GO:0010053//root epidermal cell differentiation
Unigene0084910	3.42922	1.13959	-1.58937	3.1979e-08	6.12048e-07	PREDICTED: uncharacterized transporter YBR287W0like isoform X1 [Cicer arietinum]	0	0	0	0
Unigene0052740	5.82701	1.94034	-1.58645	3.20144e-13	1.33885e-11	PREDICTED: ammonium transporter 1 member 30like [Cicer arietinum]	0	GO:0031224//intrinsic to membrane	GO:0015077//monovalent inorganic cation transmembrane transporter activity;GO:0008092//cytoskeletal protein binding;GO:0016787//hydrolase activity	GO:0015696//ammonium transport;GO:0006996//organelle organization
Unigene0002905	2.57149	0.857894	-1.58373	6.0913e-05	0.000651235	Peptide transporter PTR1 [Medicago truncatula]	0	GO:0031224//intrinsic to membrane	0	GO:0015833//peptide transport
Unigene0005334	3.0425	1.01503	-1.58373	6.0913e-05	0.000651136	PREDICTED: pyridoxine/pyridoxamine 5'0phosphate oxidase 20like isoform X1 [Cicer arietinum]	0	0	0	0
Unigene0053209	2.63134	0.880847	-1.57884	1.61351e-06	2.39054e-05	RNA0directed DNA polymerase (Reverse transcriptase); Chromo; Zinc finger, CCHC0type; Peptidase aspartic, active site; Polynucleotidyl transferase, Ribonuclease H fold [Medicago truncatula]	0	0	GO:0003676//nucleic acid binding;GO:0016740//transferase activity	GO:0006259//DNA metabolic process;GO:0034645//cellular macromolecule biosynthetic process
Unigene0005106	10.8642	3.64895	-1.57404	1.79508e-12	6.15785e-11	Homeobox0leucine zipper protein ATHB016 [Medicago truncatula]	0	0	0	0
Unigene0047219	6.79485	2.28625	-1.57146	9.112e-16	4.82819e-14	Omega0hydroxypalmitate O0feruloyl transferase [Medicago truncatula]	0	0	0	0
Unigene0014325	6.46312	2.18085	-1.56734	6.717e-06	8.89787e-05	Seed maturation protein PM36 [Medicago truncatula]	0	0	0	0
Unigene0008924	1152.48	389.364	-1.56556	0	0	PREDICTED: GDSL esterase/lipase At5g333700like [Glycine max]	0	0	0	0
Unigene0010167	2.39686	0.81048	-1.5643	3.88298e-06	5.36911e-05	NAC domain transcription factor [Medicago truncatula]	0	0	0	0
Unigene0041930	130.763	44.2452	-1.56336	0	0	trans0cinnamic acid hydroxylase [Pisum sativum]	ko00940//Phenylpropanoid biosynthesis;ko00360//Phenylalanine metabolism;ko00941//Flavonoid biosynthesis;ko00945//Stilbenoid, diarylheptanoid and gingerol biosynthesis	0	0	0
Unigene0006737	6.55571	2.23843	-1.55027	8.25298e-10	1.91365e-08	PREDICTED: RNA polymerase II subunit A C0terminal domain phosphatase SSU720like [Cicer arietinum]	0	GO:0009536//plastid	GO:0016791//phosphatase activity	GO:0006464//protein modification process;GO:0006396//RNA processing
Unigene0009951	11.6226	3.96849	-1.55027	1.62036e-05	0.000198816	chalcone synthase 1 [Astragalus membranaceus]	ko04712//Circadian rhythm 0 plant;ko00941//Flavonoid biosynthesis	0	GO:0016747//transferase activity, transferring acyl groups other than amino0acyl groups;GO:0046914//transition metal ion binding;GO:0016702//oxidoreductase activity, acting on single donors with incorporation of molecular oxygen, incorporation of two atoms of oxygen	GO:0006633//fatty acid biosynthetic process
Unigene0053720	3.19384	1.09382	-1.54592	5.39992e-06	7.28261e-05	S1 ribosomal protein [Pisum sativum]	0	GO:0030529//ribonucleoprotein complex;GO:0043231//intracellular membrane0bounded organelle	0	0
Unigene0040199	934.295	320.299	-1.54446	0	0	Chalcone synthase [Medicago truncatula]	ko04712//Circadian rhythm 0 plant;ko00941//Flavonoid biosynthesis	0	GO:0016747//transferase activity, transferring acyl groups other than amino0acyl groups	GO:0008152//metabolic process
Unigene0043237	105.164	36.0891	-1.54301	4.11512e-74	3.89541e-72	PREDICTED: auxin0induced protein AUX280like [Cicer arietinum]	0	0	0	0
Unigene0001984	7.13087	2.44814	-1.54239	8.02102e-17	4.39988e-15	Octicosapeptide/Phox/Bem1p family protein [Arabidopsis thaliana]	0	GO:0043231//intracellular membrane0bounded organelle	GO:0004672//protein kinase activity	GO:0006468//protein phosphorylation;GO:0048588//developmental cell growth
Unigene0050985	15.9777	5.4939	-1.54016	2.25948e-12	7.59109e-11	Myb transcription factor [Medicago truncatula]	0	GO:0043231//intracellular membrane0bounded organelle	GO:0003676//nucleic acid binding	0
Unigene0004054	8.16496	2.84591	-1.52055	2.10702e-22	1.31546e-20	Allene oxide synthase [Medicago truncatula]	0	0	GO:0046914//transition metal ion binding;GO:0016491//oxidoreductase activity;GO:0046906//tetrapyrrole binding	GO:0044710
Unigene0000197	3.90139	1.3713	-1.50845	1.0372e-05	0.000132364	0	0	0	0	0
Unigene0048175	15.8121	5.55779	-1.50845	2.59908e-08	5.03632e-07	0	0	0	0	0
Unigene0042091	127.147	44.8911	-1.50199	2.05676e-52	1.74213e-50	0	0	0	0	0
Unigene0043645	114.85	40.792	-1.49339	1.50988e-71	1.41209e-69	Abscisic acid stress ripening protein [Medicago truncatula]	0	0	0	0
Unigene0015484	3.45045	1.22556	-1.49334	9.28934e-07	1.43835e-05	Transmembrane protein [Medicago truncatula]	0	0	0	0
Unigene0009974	13.5414	4.80976	-1.49334	9.28934e-07	1.43867e-05	PREDICTED: LOW QUALITY PROTEIN: probable calcium0binding protein CML490like [Cicer arietinum]	0	0	GO:0016787//hydrolase activity;GO:0046872//metal ion binding	GO:0019538//protein metabolic process
Unigene0038237	4.46102	1.58602	-1.49196	2.76656e-06	3.93252e-05	PREDICTED: zinc finger A20 and AN1 domain0containing stress0associated protein 80like isoform X1 [Cicer arietinum]	0	0	GO:0016740//transferase activity;GO:0046872//metal ion binding	0
Unigene0009739	511.71	182.141	-1.49027	0	0	Protein TRANSPARENT TESTA [Medicago truncatula]	0	GO:0031090//organelle membrane	GO:0015291//secondary active transmembrane transporter activity	GO:0015893//drug transport;GO:0044763;GO:0003006//developmental process involved in reproduction
Unigene0045845	8.48318	3.02625	-1.48707	4.31342e-05	0.000478162	Peroxidase [Medicago truncatula]	ko00680//Methane metabolism;ko00940//Phenylpropanoid biosynthesis;ko00360//Phenylalanine metabolism	0	GO:0003824//catalytic activity;GO:0016209//antioxidant activity;GO:0043169//cation binding;GO:0046906//tetrapyrrole binding	GO:0044710;GO:0006950//response to stress
Unigene0051277	4.17868	1.49366	-1.4842	4.91978e-08	9.20229e-07	Zinc finger protein [Medicago truncatula]	0	0	GO:0005488//binding	GO:0009987//cellular process
Unigene0002392	5.07603	1.81547	-1.48336	8.45376e-08	1.53255e-06	Avr9/Cf09 rapidly elicited protein 146 [Nicotiana tabacum]	0	0	0	0
Unigene0007335	4.71274	1.6866	-1.48245	1.45345e-07	2.54213e-06	PREDICTED: major pollen allergen0like [Cucumis sativus]	0	GO:0043231//intracellular membrane0bounded organelle	0	GO:0060918//auxin transport;GO:0000097//sulfur amino acid biosynthetic process;GO:0043479;GO:0032535;GO:0045229//external encapsulating structure organization;GO:0048588//developmental cell growth;GO:0005976//polysaccharide metabolic process;GO:0009826//unidimensional cell growth;GO:0007275//multicellular organismal development
Unigene0003716	6.70066	2.40139	-1.48043	4.3043e-07	7.01517e-06	phototropin0like protein [Pisum sativum]	0	GO:0043231//intracellular membrane0bounded organelle;GO:0044459//plasma membrane part	GO:0005515//protein binding;GO:0004672//protein kinase activity;GO:0009881//photoreceptor activity;GO:0032553	GO:0015992//proton transport;GO:0009639//response to red or far red light;GO:0009642//response to light intensity;GO:0010360//negative regulation of anion channel activity;GO:0034285;GO:0009902//chloroplast relocation;GO:0010118//stomatal movement;GO:0006468//protein phosphorylation;GO:0007165//signal transduction;GO:0009606//tropism
Unigene0020556	5.666	2.03934	-1.47423	2.29022e-08	4.46004e-07	ribosomal protein S4 [Pisum sativum]	ko03010//Ribosome	0	0	0
Unigene0057566	1.42731	0.516888	-1.46538	5.9467e-05	0.000638505	gag0pro [Pisum sativum]	0	0	0	0
Unigene0047484	12.4652	4.51416	-1.46538	5.9467e-05	0.000638602	0	0	0	0	0
Unigene0041640	115.94	42.057	-1.46296	2.862e-126	3.01474e-124	Tubulin beta chain [Medicago truncatula]	ko04145//Phagosome;ko04540//Gap junction;ko05130//Pathogenic Escherichia coli infection	0	0	0
Unigene0016339	255.945	93.0744	-1.45938	7.21988e-68	6.6458e-66	chlorophyll a/b0binding protein, partial [Schiedea haleakalensis]	ko00196//Photosynthesis 0 antenna proteins	GO:0009521;GO:0009534//chloroplast thylakoid	GO:0043169//cation binding	GO:0006091//generation of precursor metabolites and energy
Unigene0004672	121.845	44.5042	-1.45303	4.96746e-115	5.15505e-113	PREDICTED: protein PLANT CADMIUM RESISTANCE 10like [Cicer arietinum]	0	0	0	0
Unigene0045705	14.9227	5.4762	-1.44626	1.19005e-34	8.89664e-33	Feruloyl esterase A [Medicago truncatula]	0	GO:0009536//plastid	GO:0004620//phospholipase activity	GO:0000097//sulfur amino acid biosynthetic process;GO:0010224//response to UV0B;GO:0009746;GO:0009267//cellular response to starvation;GO:0006970//response to osmotic stress;GO:0019758;GO:0009247//glycolipid biosynthetic process;GO:0042044//fluid transport;GO:0016109
Unigene0003176	7.35779	2.70482	-1.44374	3.06562e-13	1.28666e-11	PREDICTED: glutaredoxin domain0containing cysteine0rich protein 10like [Solanum lycopersicum]	0	GO:0015629//actin cytoskeleton	0	GO:0022607//cellular component assembly;GO:0009658//chloroplast organization
Unigene0007391	4.72925	1.739	-1.44335	8.176e-05	0.000847345	Os05g0103400 [Oryza sativa Japonica Group]	0	0	0	0
Unigene0081953	3.64816	1.34283	-1.4419	4.95152e-14	2.39702e-12	Photosystem II CP43 chlorophyll apoprotein [Medicago truncatula]	ko00195//Photosynthesis	0	0	0
Unigene0047239	8.614	3.17471	-1.44006	6.43562e-07	1.02224e-05	PREDICTED: inactive protein kinase SELMODRAFT_4440750like isoform X1 [Cicer arietinum]	0	0	0	0
Unigene0022017	10.1861	3.75931	-1.43806	1.23983e-05	0.000155727	Wound0responsive family protein [Theobroma cacao]	0	0	0	0
Unigene0008571	4.49647	1.66028	-1.43736	1.10796e-06	1.69531e-05	Glyceraldehyde030phosphate dehydrogenase A [Theobroma cacao]	0	0	0	0
Unigene0048913	6.94419	2.57492	-1.43128	3.29102e-06	4.60053e-05	PREDICTED: protein GDAP2 homolog isoform X2 [Cicer arietinum]	0	GO:0043231//intracellular membrane0bounded organelle	0	0
Unigene0039673	580.378	216.428	-1.4231	0	0	PREDICTED: adenosylhomocysteinase0like [Cicer arietinum]	ko00270//Cysteine and methionine metabolism	0	0	0
Unigene0013109	4.52818	1.68905	-1.42272	1.51267e-06	2.2545e-05	PREDICTED: protein TRANSPARENT TESTA 120like [Cicer arietinum]	0	0	0	0
Unigene0044627	13.3151	4.97885	-1.41918	2.60574e-06	3.72054e-05	PREDICTED: activator of 90 kDa heat shock protein ATPase homolog [Cicer arietinum]	0	0	0	0
Unigene0048897	2.00665	0.752338	-1.41534	4.49206e-06	6.14699e-05	20succinylbenzoate0CoA ligase [Medicago truncatula]	0	0	GO:0003824//catalytic activity	0
Unigene0021546	4.42681	1.66555	-1.41027	5.08414e-05	0.000554906	PREDICTED: activating signal cointegrator 1 complex subunit 2 homolog [Cicer arietinum]	0	GO:0043231//intracellular membrane0bounded organelle	0	0
Unigene0016563	239.314	90.1434	-1.40861	1.08396e-84	1.06345e-82	dormancy0associated protein [Pisum sativum]	0	0	0	0
Unigene0049797	3.84772	1.45139	-1.40657	1.33831e-05	0.000166929	PREDICTED: ethylene0responsive transcription factor ERF0170like [Cicer arietinum]	0	0	0	GO:0006351//transcription, DNA0dependent
Unigene0044143	140.517	53.0669	-1.40486	1.00899e-84	9.91283e-83	PREDICTED: glycine0rich RNA0binding protein 70like [Cicer arietinum]	0	0	0	0
Unigene0082263	9.30331	3.51491	-1.40426	3.10096e-13	1.29994e-11	PREDICTED: dual specificity protein phosphatase 80like [Cicer arietinum]	0	0	0	0
Unigene0024834	9.97049	3.76957	-1.40326	1.4808e-07	2.58804e-06	EXORDIUM like 2 [Theobroma cacao]	0	0	0	0
Unigene0045745	10.6034	4.01032	-1.40274	2.73354e-10	6.69985e-09	Zinc finger CCCH domain0containing protein [Medicago truncatula]	0	0	GO:0036094;GO:0003676//nucleic acid binding;GO:0043169//cation binding	0
Unigene0083700	3.25261	1.2312	-1.40153	2.31324e-05	0.000272199	50S ribosomal protein L13 [Medicago truncatula]	0	0	0	0
Unigene0047911	10.0913	3.83771	-1.39479	1.17228e-07	2.07892e-06	PREDICTED: transcription factor bHLH1370like [Cicer arietinum]	0	0	0	0
Unigene0042682	60.7279	23.1495	-1.39138	1.61071e-33	1.18892e-31	Actin 7 isoform 1 [Theobroma cacao]	0	GO:0031981//nuclear lumen;GO:0005911//cell0cell junction;GO:0016020//membrane;GO:0009532//plastid stroma;GO:0030312//external encapsulating structure;GO:0043232;GO:0009526//plastid envelope	GO:0005198//structural molecule activity;GO:0032550	GO:0051603//proteolysis involved in cellular protein catabolic process;GO:0009913//epidermal cell differentiation;GO:0022622;GO:0006996//organelle organization;GO:0008104//protein localization;GO:0006006//glucose metabolic process;GO:0048588//developmental cell growth;GO:0009314//response to radiation;GO:0006950//response to stress;GO:0009725//response to hormone stimulus
Unigene0004926	2.03126	0.776051	-1.38815	4.82622e-06	6.56195e-05	protein kinase [Medicago sativa]	0	0	0	0
Unigene0052186	6.35698	2.42871	-1.38815	4.82622e-06	6.56068e-05	0	0	0	0	0
Unigene0028126	4.04574	1.54629	-1.38759	1.28653e-06	1.94855e-05	unnamed protein product [Arabidopsis thaliana]	0	0	0	0
Unigene0028336	3.73907	1.42953	-1.38714	3.44702e-07	5.69213e-06	Xyloglucan endotransglucosylase/hydrolase [Medicago truncatula]	ko04075//Plant hormone signal transduction	0	0	0
Unigene0011165	3.14778	1.20378	-1.38677	9.27442e-08	1.67181e-06	PREDICTED: nudix hydrolase 19, chloroplastic0like [Cicer arietinum]	ko04146//Peroxisome;ko00760//Nicotinate and nicotinamide metabolism	0	GO:0043169//cation binding;GO:0003824//catalytic activity	0
Unigene0049210	14.0094	5.37182	-1.38292	9.83556e-14	4.5597e-12	Ethylene0responsive transcription factor RAP201 [Medicago truncatula]	0	GO:0043231//intracellular membrane0bounded organelle	GO:0003676//nucleic acid binding;GO:0001071//nucleic acid binding transcription factor activity	GO:0006351//transcription, DNA0dependent
Unigene0041486	341.511	131.204	-1.38012	0	0	Chalcone0flavonone isomerase [Medicago truncatula]	ko00941//Flavonoid biosynthesis	0	GO:0016872//intramolecular lyase activity	GO:0009812//flavonoid metabolic process
Unigene0054531	4.55226	1.7505	-1.37881	2.72318e-07	4.57449e-06	aminophospholipid ATPase [Populus trichocarpa]	0	GO:0031224//intrinsic to membrane	GO:0005548//phospholipid transporter activity;GO:0046872//metal ion binding;GO:0008324//cation transmembrane transporter activity;GO:0003824//catalytic activity;GO:0032550	GO:0006869//lipid transport;GO:0006811//ion transport
Unigene0016059	2.30114	0.885129	-1.37839	1.01534e-06	1.56213e-05	NADP0thioredoxin reductase C [Medicago truncatula]	ko00240//Pyrimidine metabolism;ko00450//Selenocompound metabolism	GO:0009532//plastid stroma	GO:0005515//protein binding;GO:0000166//nucleotide binding;GO:0016667//oxidoreductase activity, acting on a sulfur group of donors;GO:0016209//antioxidant activity;GO:0030234//enzyme regulator activity	GO:0016109;GO:0006090//pyruvate metabolic process;GO:0042743//hydrogen peroxide metabolic process;GO:0009668;GO:0015995//chlorophyll biosynthetic process;GO:0010962//regulation of glucan biosynthetic process;GO:0019725//cellular homeostasis;GO:0010038//response to metal ion;GO:0044093;GO:0006801//superoxide metabolic process
Unigene0050384	10.8206	4.16284	-1.37814	1.37814e-11	3.93068e-10	aminophospholipid ATPase [Populus trichocarpa]	0	GO:0031224//intrinsic to membrane	GO:0005548//phospholipid transporter activity;GO:0046872//metal ion binding;GO:0008324//cation transmembrane transporter activity;GO:0003824//catalytic activity;GO:0032550	GO:0006869//lipid transport;GO:0006811//ion transport
Unigene0017771	12.7611	4.92515	-1.37352	1.04901e-34	7.85064e-33	PREDICTED: probable anion transporter 3, chloroplastic0like [Cicer arietinum]	0	GO:0043231//intracellular membrane0bounded organelle;GO:0031224//intrinsic to membrane	GO:0005402;GO:0008509//anion transmembrane transporter activity	GO:0015698//inorganic anion transport;GO:0044763;GO:0008643//carbohydrate transport
Unigene0084422	1.41911	0.547704	-1.37352	1.74385e-06	2.56467e-05	Subtilisin0like serine protease [Medicago truncatula]	0	0	0	0
Unigene0044429	4.49339	1.73639	-1.37171	5.36106e-10	1.26956e-08	CONSTANS0like zinc finger protein [Medicago truncatula]	0	0	0	0
Unigene0045854	13.2527	5.13075	-1.36904	9.43024e-05	0.000962382	0	0	0	0	0
Unigene0048178	15.6652	6.07312	-1.36706	5.22412e-30	3.73032e-28	PREDICTED: myosin02 heavy chain0like isoform X1 [Cicer arietinum]	0	0	0	0
Unigene0045922	17.1962	6.68729	-1.3626	1.87701e-22	1.17395e-20	Cysteine0rich receptor0like protein kinase [Medicago truncatula]	0	0	0	0
Unigene0037836	16.6998	6.51849	-1.35722	9.09266e-20	5.37495e-18	PREDICTED: salt tolerance protein0like [Cicer arietinum]	0	GO:0044464//cell part	GO:0046914//transition metal ion binding	0
Unigene0042317	69.7676	27.3615	-1.35041	6.05858e-99	6.12406e-97	Calcium0dependent phosphotriesterase superfamily protein [Theobroma cacao]	0	0	0	0
Unigene0003678	3.91412	1.5385	-1.34717	6.9635e-06	9.20178e-05	N0terminal acetyltransferase B complex catalytic subunit [Medicago truncatula]	0	0	GO:0034212//peptide N0acetyltransferase activity	GO:0006952//defense response;GO:0006631//fatty acid metabolic process
Unigene0048696	3.96194	1.55729	-1.34717	6.9635e-06	9.20004e-05	PREDICTED: dentin sialophosphoprotein0like [Cicer arietinum]	0	0	0	0
Unigene0041693	255.074	100.345	-1.34595	0	0	leucine rich protein [Arachis hypogaea]	0	0	0	0
Unigene0013506	2.91584	1.14911	-1.34339	8.3158e-08	1.50949e-06	Homeodomain protein (HB2) [Medicago truncatula]	0	GO:0043231//intracellular membrane0bounded organelle	GO:0003677//DNA binding;GO:0019904//protein domain specific binding;GO:0001071//nucleic acid binding transcription factor activity	GO:0006351//transcription, DNA0dependent
Unigene0047870	24.6735	9.72748	-1.34282	5.34368e-25	3.52467e-23	COP10interacting protein [Medicago truncatula]	0	0	0	0
Unigene0044746	18.1951	7.18077	-1.34134	1.68479e-12	5.81943e-11	MYB transcription factor MYB2 [Medicago truncatula]	0	0	0	0
Unigene0086129	19.315	7.66503	-1.33336	2.28926e-13	9.94791e-12	PREDICTED: auxin0induced protein 6B0like [Glycine max]	ko04075//Plant hormone signal transduction	0	0	0
Unigene0015152	2.97893	1.18856	-1.32558	7.81768e-05	0.000813701	Transcription factor bHLH51 [Medicago truncatula]	0	0	GO:0005515//protein binding	0
Unigene0003725	7.43031	2.97229	-1.32185	4.0819e-24	2.64508e-22	PREDICTED: probable receptor0like serine/threonine0protein kinase At5g576700like [Glycine max]	0	0	GO:0036094;GO:1901363;GO:0097159;GO:0004674//protein serine/threonine kinase activity	GO:0050896//response to stimulus;GO:0006796//phosphate0containing compound metabolic process
Unigene0002007	2.78072	1.11248	-1.32168	3.2601e-07	5.40257e-06	Aspartic proteinase nepenthesin02 [Medicago truncatula]	0	0	GO:0004175//endopeptidase activity	GO:0019538//protein metabolic process
Unigene0044811	4.99377	1.99829	-1.32136	1.50155e-07	2.61907e-06	PREDICTED: LOW QUALITY PROTEIN: uncharacterized LOC101207565 [Cucumis sativus]	0	0	0	0
Unigene0044305	52.9676	21.2712	-1.31621	3.08888e-84	3.02197e-82	PREDICTED: tetraketide alpha0pyrone reductase 20like [Cicer arietinum]	0	0	0	0
Unigene0038354	35.8408	14.3973	-1.3158	1.17618e-12	4.21003e-11	Flavonol sulfotransferase0like protein [Medicago truncatula]	0	0	GO:0016782//transferase activity, transferring sulfur0containing groups	0
Unigene0004060	3.6793	1.47798	-1.3158	2.51604e-08	4.87811e-07	PREDICTED: zinc finger CCCH domain0containing protein 210like [Cicer arietinum]	0	0	0	0
Unigene0054661	3.8877	1.5617	-1.3158	1.26385e-05	0.00015846	Cytochrome b6/f complex subunit V [Medicago truncatula]	ko00195//Photosynthesis	GO:0031224//intrinsic to membrane;GO:0009521;GO:0009534//chloroplast thylakoid	GO:0043169//cation binding;GO:0009055//electron carrier activity	GO:0022900//electron transport chain;GO:0019684//photosynthesis, light reaction;GO:0043623//cellular protein complex assembly;GO:0006351//transcription, DNA0dependent
Unigene0084240	3.08242	1.23821	-1.3158	1.21182e-06	1.84336e-05	PREDICTED: MATE efflux family protein 90like [Cicer arietinum]	0	0	0	0
Unigene0085584	19.5214	7.8492	-1.31444	2.89306e-26	1.94487e-24	10aminocyclopropane010carboxylate oxidase [Medicago truncatula]	0	0	0	0
Unigene0002633	9.107	3.66662	-1.31253	9.1811e-12	2.68417e-10	0	0	0	0	0
Unigene0047918	7.09626	2.86163	-1.31022	2.01294e-07	3.44923e-06	20nonaprenyl030methyl060methoxy01,40benzoquinol hydroxylase [Theobroma cacao]	0	0	0	0
Unigene0002407	6.52125	2.63034	-1.3099	4.37206e-07	7.11732e-06	OSJNBa0011F23.60like protein [Hyacinthus orientalis]	0	0	0	0
Unigene0053112	3.62481	1.4633	-1.30868	4.5234e-06	6.18625e-05	UDP0glucuronosyltransferase 106 [Medicago truncatula]	ko00940//Phenylpropanoid biosynthesis	0	GO:0035251//UDP0glucosyltransferase activity	GO:0010035//response to inorganic substance;GO:0009683;GO:0009698//phenylpropanoid metabolic process;GO:0032412//regulation of ion transmembrane transporter activity;GO:0006568//tryptophan metabolic process;GO:0014070//response to organic cyclic compound;GO:0015698//inorganic anion transport;GO:0009404//toxin metabolic process;GO:0030001//metal ion transport
Unigene0021883	9.3464	3.77864	-1.30654	2.6592e-12	8.82398e-11	VQ motif0containing protein [Arabidopsis lyrata subsp. lyrata]	0	0	0	0
Unigene0004104	14.0155	5.67123	-1.30528	5.66444e-11	1.50242e-09	0	0	0	0	0
Unigene0081690	8.73817	3.54976	-1.29961	6.29082e-22	3.88594e-20	PREDICTED: glucomannan 40beta0mannosyltransferase 90like [Cicer arietinum]	0	0	0	0
Unigene0003072	6.15749	2.50328	-1.29852	3.72794e-05	0.000418961	GT02 factor [Medicago truncatula]	0	0	GO:0005488//binding	0
Unigene0049099	6.59461	2.68099	-1.29852	4.45736e-09	9.49327e-08	PREDICTED: PRA1 family protein E0like [Cicer arietinum]	0	GO:0043231//intracellular membrane0bounded organelle	0	0
Unigene0043534	16.1096	6.55057	-1.29823	7.55858e-11	1.98527e-09	PREDICTED: glycine0rich cell wall structural protein 10like [Cicer arietinum]	0	0	0	0
Unigene0003075	11.1596	4.5395	-1.29768	7.08498e-18	4.01534e-16	PREDICTED: probable WRKY transcription factor 530like [Cicer arietinum]	0	0	GO:0003677//DNA binding;GO:0001071//nucleic acid binding transcription factor activity	GO:0006351//transcription, DNA0dependent
Unigene0050155	7.4453	3.05163	-1.28675	6.92608e-15	3.54653e-13	Arogenate dehydratase/prephenate dehydratase [Medicago truncatula]	0	0	GO:0016836//hydro0lyase activity	GO:0006558//L0phenylalanine metabolic process
Unigene0039640	1170.13	480.866	-1.28297	0	0	Adenosylhomocysteinase [Medicago truncatula]	ko00270//Cysteine and methionine metabolism	0	GO:0016802	GO:0044237//cellular metabolic process
Unigene0036727	5.3414	2.19654	-1.28199	6.6802e-13	2.55566e-11	Cysteine0rich receptor0like protein kinase [Medicago truncatula]	0	0	GO:0004672//protein kinase activity;GO:0032550	GO:0006796//phosphate0containing compound metabolic process;GO:0006464//protein modification process
Unigene0024128	4.01174	1.6532	-1.27896	2.8852e-09	6.28633e-08	PREDICTED: LOW QUALITY PROTEIN: wall0associated receptor kinase 20like [Cicer arietinum]	0	GO:0031224//intrinsic to membrane	GO:0046872//metal ion binding;GO:0001871;GO:0004672//protein kinase activity;GO:0032550	GO:0006796//phosphate0containing compound metabolic process;GO:0006464//protein modification process
Unigene0005423	3.18739	1.32081	-1.27095	1.3863e-05	0.000172393	PREDICTED: enoyl0CoA hydratase 2, peroxisomal0like [Cicer arietinum]	0	0	0	0
Unigene0017332	1.62315	0.676173	-1.26333	6.68164e-05	0.000707868	PREDICTED: formin0like protein 200like [Glycine max]	ko04310//Wnt signaling pathway	0	0	0
Unigene0005201	8.03514	3.36325	-1.25647	5.97692e-13	2.31826e-11	PREDICTED: uro0adherence factor A0like [Cicer arietinum]	0	0	0	0
Unigene0020447	14.1345	5.93893	-1.25095	4.05314e-05	0.000451381	PREDICTED: signal recognition particle 14 kDa protein0like [Cicer arietinum]	ko03060//Protein export	GO:0048500//signal recognition particle	GO:0005048//signal sequence binding;GO:0003723//RNA binding	GO:0006613//cotranslational protein targeting to membrane
Unigene0049415	8.95968	3.78528	-1.24305	3.40268e-10	8.23331e-09	Os03g0665700 [Oryza sativa Japonica Group]	0	0	0	0
Unigene0010697	17.5574	7.42164	-1.24227	5.32474e-08	9.91211e-07	0	0	0	0	0
Unigene0006046	16.809	7.10803	-1.24171	3.1725e-18	1.81561e-16	PREDICTED: LOW QUALITY PROTEIN: uncharacterized LOC101218032 [Cucumis sativus]	0	0	0	0
Unigene0017902	12.4728	5.27513	-1.24151	1.12882e-06	1.72423e-05	calcineurin B [Pisum sativum]	ko04310//Wnt signaling pathway;ko04010//MAPK signaling pathway;ko04114//Oocyte meiosis;ko05010//Alzheimer's disease;ko04370//VEGF signaling pathway;ko04360//Axon guidance;ko04662//B cell receptor signaling pathway;ko04650//Natural killer cell mediated cytotoxicity;ko05152//Tuberculosis;ko05014//Amyotrophic lateral sclerosis (ALS);ko04724//Glutamatergic synapse;ko04020//Calcium signaling pathway;k…	GO:0030659//cytoplasmic vesicle membrane	GO:0046872//metal ion binding	0
Unigene0013870	6.29862	2.66828	-1.23913	2.80308e-11	7.66704e-10	Low0temperature0induced 65 kDa protein [Medicago truncatula]	0	0	0	0
Unigene0014461	5.17424	2.19445	-1.23749	8.06238e-12	2.38095e-10	PREDICTED: protein kinase APK1B, chloroplastic0like isoform X1 [Cicer arietinum]	0	0	0	0
Unigene0082254	11.9321	5.06261	-1.2369	1.18585e-08	2.3925e-07	0	0	0	0	0
Unigene0004898	20.4365	8.6994	-1.23216	4.74042e-26	3.17762e-24	metal transport protein [Medicago truncatula]	0	0	0	0
Unigene0009518	46.2966	19.7906	-1.22609	1.05163e-31	7.62587e-30	hypothetical protein MTR_4g082880 [Medicago truncatula]	0	0	0	0
Unigene0038351	13.4522	5.75619	-1.22465	3.26512e-05	0.000371176	Flavonol sulfotransferase0like protein [Medicago truncatula]	0	0	GO:0016782//transferase activity, transferring sulfur0containing groups	0
Unigene0007244	11.332	4.86071	-1.22116	2.5352e-06	3.62721e-05	PREDICTED: 30oxoacyl0[acyl0carrier0protein] synthase II, chloroplastic0like [Cicer arietinum]	ko00061//Fatty acid biosynthesis	0	GO:0016747//transferase activity, transferring acyl groups other than amino0acyl groups	GO:0044699;GO:0008610//lipid biosynthetic process;GO:0006631//fatty acid metabolic process;GO:0006520//cellular amino acid metabolic process;GO:0072330;GO:0051186//cofactor metabolic process;GO:0006725//cellular aromatic compound metabolic process;GO:0046483//heterocycle metabolic process;GO:1901360
Unigene0004890	35.6788	15.3169	-1.21994	8.52626e-40	6.63618e-38	PREDICTED: LOW QUALITY PROTEIN: uncharacterized LOC101210164 [Cucumis sativus]	0	0	0	0
Unigene0017723	4.21575	1.81244	-1.21786	1.97835e-06	2.87932e-05	PREDICTED: peptide methionine sulfoxide reductase0like isoform X1 [Cicer arietinum]	0	0	GO:0016671//oxidoreductase activity, acting on a sulfur group of donors, disulfide as acceptor	GO:0044710
Unigene0005678	32.4293	13.9435	-1.21771	7.2676e-46	5.85159e-44	PREDICTED: expansin0A110like [Cicer arietinum]	0	0	0	0
Unigene0047208	6.06753	2.60939	-1.2174	1.61896e-08	3.21446e-07	Hydroquinone glucosyltransferase [Medicago truncatula]	0	0	0	0
Unigene0003478	7.74063	3.33353	-1.2154	5.51012e-06	7.41981e-05	Thaumatin0like protein [Medicago truncatula]	0	0	0	GO:0009607//response to biotic stimulus
Unigene0012997	7.71253	3.32914	-1.21205	4.2959e-06	5.90162e-05	PREDICTED: two0component response regulator0like APRR20like isoform X1 [Cicer arietinum]	0	GO:0043231//intracellular membrane0bounded organelle	GO:0003676//nucleic acid binding;GO:0004871//signal transducer activity;GO:0001071//nucleic acid binding transcription factor activity	GO:0048511//rhythmic process;GO:0009755//hormone0mediated signaling pathway;GO:0006351//transcription, DNA0dependent
Unigene0040180	30.8902	13.3359	-1.21183	9.84072e-17	5.36863e-15	phi01 [Nicotiana tabacum]	0	0	0	0
Unigene0044062	87.9622	37.9902	-1.21126	5.00152e-133	5.34072e-131	Emb:CAB81597.1 [Theobroma cacao]	0	0	0	0
Unigene0009232	112.198	48.5857	-1.20744	2.38924e-32	1.74701e-30	PREDICTED: V0type proton ATPase 16 kDa proteolipid subunit0like isoform 1 [Glycine max]	ko04145//Phagosome;ko00190//Oxidative phosphorylation;ko04142//Lysosome;ko05120//Epithelial cell signaling in Helicobacter pylori infection;ko05152//Tuberculosis;ko05110//Vibrio cholerae infection;ko05323//Rheumatoid arthritis;ko04966//Collecting duct acid secretion	GO:0009536//plastid;GO:0031224//intrinsic to membrane;GO:0016471//vacuolar proton0transporting V0type ATPase complex	GO:0017111//nucleoside0triphosphatase activity;GO:0015078//hydrogen ion transmembrane transporter activity	GO:0015988//energy coupled proton transport, against electrochemical gradient;GO:0006996//organelle organization;GO:0006970//response to osmotic stress;GO:0006006//glucose metabolic process;GO:0070838//divalent metal ion transport;GO:0009154;GO:0048588//developmental cell growth
Unigene0005184	6.73914	2.92487	-1.20419	6.83928e-11	1.80378e-09	extensin [Volvox carteri]	0	0	0	0
Unigene0004415	7.90938	3.43879	-1.20166	1.20735e-11	3.47181e-10	PREDICTED: THO complex subunit 40like [Cicer arietinum]	ko03040//Spliceosome;ko03013//RNA transport;ko03015//mRNA surveillance pathway	GO:0031981//nuclear lumen	GO:0097159	0
Unigene0048699	3.75476	1.63269	-1.20147	2.61556e-05	0.000304398	Zinc finger CCCH domain0containing protein [Medicago truncatula]	0	0	0	0
Unigene0038029	8.29424	3.61502	-1.19811	1.39708e-09	3.15996e-08	Os09g0463600 [Oryza sativa Japonica Group]	0	GO:0009536//plastid	0	0
Unigene0047474	7.27577	3.17112	-1.19811	2.03474e-05	0.000243769	PREDICTED: squamosa promoter0binding0like protein 10like [Cicer arietinum]	0	0	0	0
Unigene0004197	9.61252	4.19425	-1.1965	4.4175e-06	6.05442e-05	Squalene epoxidase [Medicago truncatula]	ko00100//Steroid biosynthesis	GO:0031224//intrinsic to membrane	GO:0016709//oxidoreductase activity, acting on paired donors, with incorporation or reduction of molecular oxygen, NADH or NADPH as one donor, and incorporation of one atom of oxygen;GO:0000166//nucleotide binding	GO:0044710
Unigene0048636	8.9612	3.91428	-1.19495	1.58324e-05	0.000194672	Tubulin beta chain [Medicago truncatula]	ko04145//Phagosome;ko04540//Gap junction;ko05130//Pathogenic Escherichia coli infection	GO:0032991//macromolecular complex;GO:0015630//microtubule cytoskeleton	GO:0017111//nucleoside0triphosphatase activity;GO:0032550;GO:0005198//structural molecule activity	GO:0009154;GO:0044763;GO:0043623//cellular protein complex assembly
Unigene0048408	12.9878	5.67453	-1.19459	1.2415e-11	3.5598e-10	LOB domain0containing protein [Medicago truncatula]	0	0	0	0
Unigene0041183	312.795	136.698	-1.19422	2.59592e-280	3.06647e-278	Elicitor0inducible protein EIG0J7 [Medicago truncatula]	0	0	0	0
Unigene0081970	3.94438	1.72733	-1.19126	8.20982e-09	1.69244e-07	copia0type polyprotein [Arabidopsis thaliana]	0	0	0	0
Unigene0042657	32.9241	14.4252	-1.19055	4.10788e-10	9.85793e-09	RNA0binding protein AKIP1 [Vicia faba]	0	0	GO:0036094;GO:0097159	0
Unigene0046893	19.3903	8.49724	-1.19027	5.34628e-17	2.96517e-15	Centrin02 [Medicago truncatula]	0	0	GO:0046872//metal ion binding	0
Unigene0029090	26.4766	11.6142	-1.18883	2.09168e-06	3.02978e-05	0	0	0	0	0
Unigene0086986	2.2664	0.99577	-1.18652	1.63076e-06	2.41303e-05	ABC transporter G family member [Medicago truncatula]	0	0	0	0
Unigene0018127	9.20976	4.05345	-1.18401	2.86856e-15	1.48844e-13	peroxidase [Pisum sativum]	ko00680//Methane metabolism;ko00940//Phenylpropanoid biosynthesis;ko00360//Phenylalanine metabolism	0	GO:0003824//catalytic activity;GO:0016209//antioxidant activity;GO:0043169//cation binding;GO:0046906//tetrapyrrole binding	GO:0044710;GO:0006950//response to stress
Unigene0003415	6.78734	3.00295	-1.17646	4.70652e-07	7.62282e-06	PREDICTED: two0component response regulator ARR90like [Glycine max]	ko04075//Plant hormone signal transduction	0	GO:0004871//signal transducer activity	GO:0006351//transcription, DNA0dependent;GO:0007165//signal transduction
Unigene0041803	239.332	105.957	-1.17554	1.31467e-120	1.3745e-118	ATP synthase subunit alpha [Medicago truncatula]	0	0	0	0
Unigene0041879	46.2857	20.4951	-1.17529	1.13815e-18	6.56725e-17	40S ribosomal protein SA [Glycine max]	ko03010//Ribosome	0	0	0
Unigene0036729	15.0756	6.68589	-1.17303	2.86542e-07	4.79388e-06	Receptor0like protein kinase [Medicago truncatula]	0	0	GO:0004672//protein kinase activity;GO:0032550	GO:0006796//phosphate0containing compound metabolic process;GO:0006464//protein modification process
Unigene0047170	23.5327	10.4365	-1.17303	2.86542e-07	4.79503e-06	Auxin influx protein [Medicago truncatula]	ko04075//Plant hormone signal transduction	0	0	0
Unigene0017689	199.154	88.5677	-1.16903	5.74696e-178	6.46178e-176	ATP synthase subunit alpha [Medicago truncatula]	0	GO:0043231//intracellular membrane0bounded organelle;GO:0033178//proton0transporting two0sector ATPase complex, catalytic domain;GO:0031224//intrinsic to membrane	GO:0032550;GO:0019829//cation0transporting ATPase activity;GO:0015078//hydrogen ion transmembrane transporter activity	GO:0015988//energy coupled proton transport, against electrochemical gradient;GO:0006091//generation of precursor metabolites and energy;GO:0006754//ATP biosynthetic process
Unigene0046935	19.1565	8.53517	-1.16634	6.16714e-07	9.81377e-06	PREDICTED: cytokinin riboside 5'0monophosphate phosphoribohydrolase LOG30like [Glycine max]	0	0	GO:0003824//catalytic activity	0
Unigene0033086	461.676	205.784	-1.16575	0	0	Ribulose bisphosphate carboxylase small chain [Medicago truncatula]	ko00710//Carbon fixation in photosynthetic organisms;ko00630//Glyoxylate and dicarboxylate metabolism	0	0	0
Unigene0005608	3.47905	1.55208	-1.16449	2.13052e-05	0.000253681	PREDICTED: lactoylglutathione lyase0like isoform X1 [Cicer arietinum]	ko00620//Pyruvate metabolism;ko04011//MAPK signaling pathway 0 yeast	0	0	0
Unigene0049147	14.3639	6.40921	-1.16423	6.48318e-08	1.19103e-06	SAUR family protein [Medicago truncatula]	0	GO:0043231//intracellular membrane0bounded organelle	0	GO:0009725//response to hormone stimulus
Unigene0005931	27.2276	12.1584	-1.16312	5.33082e-63	4.8121e-61	bHLH [Pisum sativum]	0	0	0	0
Unigene0013045	4.93672	2.20844	-1.16052	1.7043e-06	2.51231e-05	PREDICTED: serine/arginine0rich splicing factor RSZ220like [Cicer arietinum]	0	GO:0016604//nuclear body;GO:0044444//cytoplasmic part	GO:0046914//transition metal ion binding;GO:0036094;GO:0097159	GO:0000377
Unigene0049098	9.8041	4.38586	-1.16052	2.28346e-07	3.88238e-06	0	0	0	0	0
Unigene0042997	24.3153	10.8827	-1.15982	6.41314e-47	5.22365e-45	PREDICTED: cytochrome P450 86A20like [Cicer arietinum]	0	0	GO:0046906//tetrapyrrole binding;GO:0046914//transition metal ion binding;GO:0016713;GO:0016712//oxidoreductase activity, acting on paired donors, with incorporation or reduction of molecular oxygen, reduced flavin or flavoprotein as one donor, and incorporation of one atom of oxygen	GO:0032787//monocarboxylic acid metabolic process
Unigene0051408	7.31972	3.27794	-1.159	1.32808e-06	2.00411e-05	PREDICTED: LOW QUALITY PROTEIN: wall0associated receptor kinase 20like [Cicer arietinum]	0	0	GO:0004674//protein serine/threonine kinase activity;GO:0097159;GO:0043167//ion binding;GO:1901363;GO:0036094	GO:0006468//protein phosphorylation
Unigene0006316	4.72866	2.12431	-1.15444	6.61278e-08	1.21293e-06	Anthranilate N0benzoyltransferase protein [Medicago truncatula]	0	0	GO:0016746//transferase activity, transferring acyl groups	0
Unigene0042982	109.399	49.2087	-1.15262	2.15102e-23	1.36979e-21	hypothetical protein (mitochondrion) [Vicia faba]	0	0	0	0
Unigene0005405	3.72151	1.67433	-1.1523	3.59534e-05	0.00040536	20hydroxy060oxononadienedioate/20hydroxy060 oxononatrienedioate hydrolase [Medicago truncatula]	0	0	0	0
Unigene0043271	87.4088	39.3954	-1.14975	1.77962e-100	1.80406e-98	Matrix metalloprotease [Medicago truncatula]	0	0	0	0
Unigene0003797	1.74154	0.786227	-1.14735	1.68655e-05	0.000206324	PREDICTED: conserved oligomeric Golgi complex subunit 70like [Cicer arietinum]	0	GO:0043231//intracellular membrane0bounded organelle;GO:0043234//protein complex;GO:0044444//cytoplasmic part	0	GO:0032507//maintenance of protein location in cell;GO:0006996//organelle organization;GO:0048507//meristem development;GO:0040007//growth;GO:0009653//anatomical structure morphogenesis;GO:0003006//developmental process involved in reproduction;GO:0015031//protein transport
Unigene0003757	4.39154	1.98614	-1.14476	8.21348e-07	1.28454e-05	DNA0damage0repair/toleration protein DRT100, partial [Medicago truncatula]	0	0	0	0
Unigene0045899	23.6494	10.6985	-1.14439	7.50376e-18	4.24924e-16	PREDICTED: chaperone protein dnaJ 11, chloroplastic0like [Cicer arietinum]	0	0	0	0
Unigene0043765	70.8529	32.0736	-1.14344	2.9791e-73	2.80865e-71	Phytochrome A0associated F0box protein [Medicago truncatula]	0	GO:0043231//intracellular membrane0bounded organelle	GO:0005488//binding	GO:0048827//phyllome development;GO:0009648//photoperiodism;GO:0009640//photomorphogenesis;GO:0019941//modification0dependent protein catabolic process;GO:0007602//phototransduction;GO:0007623//circadian rhythm;GO:0008104//protein localization
Unigene0017705	10.3124	4.66911	-1.14316	7.21328e-15	3.69089e-13	PREDICTED: probable GMP synthase [glutamine0hydrolyzing]0like [Glycine max]	ko03410//Base excision repair	0	0	0
Unigene0011369	6.09138	2.75905	-1.1426	8.94246e-22	5.49965e-20	PREDICTED: probable LRR receptor0like serine/threonine0protein kinase At4g265400like [Glycine max]	0	GO:0031224//intrinsic to membrane	GO:0004672//protein kinase activity;GO:0016628//oxidoreductase activity, acting on the CH0CH group of donors, NAD or NADP as acceptor;GO:0032550	GO:0006796//phosphate0containing compound metabolic process;GO:0006464//protein modification process;GO:0044710
Unigene0043245	11.1288	5.04474	-1.14144	1.83556e-16	9.95195e-15	GATA zinc finger domain0containing protein C1393.08 isoform 1 [Theobroma cacao]	0	0	0	0
Unigene0048681	4.73652	2.14818	-1.14071	7.81474e-05	0.000813637	PREDICTED: inositol0tetrakisphosphate 10kinase 10like [Cicer arietinum]	ko00562//Inositol phosphate metabolism;ko04070//Phosphatidylinositol signaling system	0	GO:0016773//phosphotransferase activity, alcohol group as acceptor;GO:0043167//ion binding;GO:0016301//kinase activity	GO:0019751;GO:0006796//phosphate0containing compound metabolic process
Unigene0003382	3.4471	1.56461	-1.13958	3.73722e-06	5.18907e-05	PREDICTED: omega0hydroxypalmitate O0feruloyl transferase0like [Cicer arietinum]	0	0	0	0
Unigene0002903	2.74278	1.24675	-1.13746	2.2655e-06	3.26804e-05	GRAS family transcription factor [Medicago truncatula]	0	0	0	GO:0006351//transcription, DNA0dependent
Unigene0013726	4.23721	1.92784	-1.13613	1.33197e-15	6.99423e-14	PREDICTED: probable leucine0rich repeat receptor0like protein kinase At2g331700like [Cicer arietinum]	0	GO:0031224//intrinsic to membrane	GO:0004702//receptor signaling protein serine/threonine kinase activity;GO:0032550;GO:0016628//oxidoreductase activity, acting on the CH0CH group of donors, NAD or NADP as acceptor	GO:0009886//post0embryonic morphogenesis;GO:0032147//activation of protein kinase activity;GO:0007167//enzyme linked receptor protein signaling pathway;GO:0044710;GO:0009607//response to biotic stimulus;GO:0048437//floral organ development
Unigene0027178	11.149	5.10021	-1.12828	6.9187e-14	3.29693e-12	PREDICTED: SNF10related protein kinase regulatory subunit beta020like [Cicer arietinum]	ko04910//Insulin signaling pathway;ko04920//Adipocytokine signaling pathway;ko05410//Hypertrophic cardiomyopathy (HCM)	0	0	0
Unigene0047309	4.63582	2.12086	-1.12817	4.87198e-06	6.62032e-05	PREDICTED: TATA0binding protein0associated factor 2N0like [Cicer arietinum]	0	0	0	0
Unigene0046808	18.684	8.54905	-1.12797	1.14043e-07	2.02704e-06	Dihydropyrimidinase [Medicago truncatula]	ko00240//Pyrimidine metabolism;ko00410//beta0Alanine metabolism;ko00770//Pantothenate and CoA biosynthesis;ko00983//Drug metabolism 0 other enzymes	GO:0043231//intracellular membrane0bounded organelle	GO:0016812//hydrolase activity, acting on carbon0nitrogen (but not peptide) bonds, in cyclic amides	GO:0031669//cellular response to nutrient levels;GO:0006625//protein targeting to peroxisome;GO:0009062//fatty acid catabolic process;GO:0006208//pyrimidine base catabolic process
Unigene0046446	7.83926	3.60114	-1.12226	4.76798e-05	0.000523335	PREDICTED: serine/threonine0protein kinase SRK2I0like isoform 2 [Glycine max]	ko04075//Plant hormone signal transduction	0	0	0
Unigene0042545	94.5664	43.4621	-1.12157	3.07452e-150	3.34941e-148	PREDICTED: hydroquinone glucosyltransferase0like [Cicer arietinum]	0	0	0	0
Unigene0009172	2.72966	1.25466	-1.12142	3.70122e-05	0.000416159	Fatty acyl0CoA reductase [Medicago truncatula]	0	0	GO:0016620//oxidoreductase activity, acting on the aldehyde or oxo group of donors, NAD or NADP as acceptor	0
Unigene0082026	1.95606	0.899085	-1.12142	3.70122e-05	0.000416092	AT5g60720/mup24_130 [Arabidopsis thaliana]	0	GO:0009536//plastid	0	GO:0010087//phloem or xylem histogenesis;GO:0042546//cell wall biogenesis;GO:0045491
Unigene0047916	19.479	8.95604	-1.12099	8.82032e-23	5.55625e-21	hsr203J homolog [Pisum sativum]	0	0	0	0
Unigene0042546	108.715	50.0974	-1.11774	3.66452e-34	2.73081e-32	PREDICTED: actin010like [Glycine max]	ko04145//Phagosome;ko04810//Regulation of actin cytoskeleton;ko04510//Focal adhesion;ko04520//Adherens junction;ko05131//Shigellosis;ko05100//Bacterial invasion of epithelial cells;ko05416//Viral myocarditis;ko04670//Leukocyte transendothelial migration;ko05110//Vibrio cholerae infection;ko05130//Pathogenic Escherichia coli infection;ko04530//Tight junction;ko05410//Hypertrophic cardiomyopathy (H…	GO:0009532//plastid stroma;GO:0043232;GO:0009526//plastid envelope;GO:0005911//cell0cell junction;GO:0016020//membrane	GO:0032550;GO:0005198//structural molecule activity	GO:0007010//cytoskeleton organization;GO:0051603//proteolysis involved in cellular protein catabolic process;GO:0006006//glucose metabolic process
Unigene0003015	3.23393	1.49074	-1.11726	8.15082e-06	0.000106363	PREDICTED: uncharacterized LOC101217985 [Cucumis sativus]	0	GO:0044444//cytoplasmic part	0	0
Unigene0044166	20.5315	9.4827	-1.11447	5.92064e-09	1.24284e-07	PREDICTED: spermidine synthase 20like [Glycine max]	0	0	0	0
Unigene0040001	6.54313	3.03063	-1.11036	6.0933e-17	3.36616e-15	ribosomal protein S3 (mitochondrion) [Vicia faba]	0	GO:0009536//plastid;GO:0044391	GO:0003723//RNA binding;GO:0005198//structural molecule activity	GO:0010467//gene expression
Unigene0050310	5.31148	2.46507	-1.10748	4.8184e-05	0.000528538	NADH0ubiquinone oxidoreductase chain [Medicago truncatula]	ko00190//Oxidative phosphorylation;ko05012//Parkinson's disease	GO:0005740//mitochondrial envelope;GO:0044425//membrane part;GO:0009536//plastid;GO:0044391	GO:0003723//RNA binding;GO:0050136//NADH dehydrogenase (quinone) activity;GO:0005198//structural molecule activity	GO:0010467//gene expression;GO:0044710
Unigene0015444	2.84693	1.32262	-1.10601	1.75278e-05	0.000213829	poly(A) polymerase [Pisum sativum]	0	GO:0009532//plastid stroma;GO:0009534//chloroplast thylakoid;GO:0044436	GO:0070566//adenylyltransferase activity;GO:0016859//cis0trans isomerase activity	GO:0006633//fatty acid biosynthetic process;GO:0042254//ribosome biogenesis;GO:0018208//peptidyl0proline modification;GO:0006470//protein dephosphorylation;GO:0010243//response to organic nitrogen;GO:0009767//photosynthetic electron transport chain;GO:0006351//transcription, DNA0dependent;GO:0009626//plant0type hypersensitive response;GO:0009886//post0embryonic morphogenesis;GO:0006090//pyruvate …
Unigene0044508	71.0626	33.0159	-1.10593	3.8601e-88	3.81915e-86	NAD(P)H0dependent 6'0deoxychalcone synthase [Medicago truncatula]	0	0	0	0
Unigene0014805	5.75594	2.6777	-1.10406	3.01836e-06	4.25162e-05	PREDICTED: ethylene0responsive transcription factor ERF1040like [Cicer arietinum]	0	0	GO:0005488//binding	GO:0006952//defense response;GO:0006351//transcription, DNA0dependent
Unigene0044615	42.1255	19.6123	-1.10293	3.50046e-50	2.89839e-48	Paired amphipathic helix protein Sin3 [Medicago truncatula]	0	0	0	0
Unigene0084367	8.2505	3.84332	-1.10213	2.52998e-13	1.08459e-11	10aminocyclopropane010carboxylate synthase [Pisum sativum]	ko00270//Cysteine and methionine metabolism	0	0	0
Unigene0048046	13.0078	6.06111	-1.10172	4.2075e-20	2.49772e-18	U0box domain0containing protein [Medicago truncatula]	0	GO:0043234//protein complex	GO:0019787//small conjugating protein ligase activity	GO:0032446//protein modification by small protein conjugation
Unigene0012336	4.75453	2.21751	-1.10036	7.74092e-09	1.60238e-07	CBL0interacting protein kinase [Medicago truncatula]	0	0	GO:0004674//protein serine/threonine kinase activity;GO:0032550	GO:0006796//phosphate0containing compound metabolic process;GO:0006464//protein modification process;GO:0007154//cell communication
Unigene0013252	6.12649	2.8712	-1.09341	8.7211e-07	1.35787e-05	PREDICTED: auxin0induced protein 6B0like [Cicer arietinum]	ko04075//Plant hormone signal transduction	GO:0043231//intracellular membrane0bounded organelle	0	GO:0009725//response to hormone stimulus
Unigene0043452	31.3809	14.7068	-1.09341	8.7211e-07	1.35817e-05	0	0	0	0	0
Unigene0043497	139.937	65.6058	-1.09288	7.88454e-97	7.92402e-95	EF0hand calcium0binding domain0containing protein 4A [Theobroma cacao]	0	0	0	0
Unigene0041388	316.288	148.466	-1.09111	0	0	PREDICTED: probable pectinesterase/pectinesterase inhibitor 400like [Cicer arietinum]	ko00500//Starch and sucrose metabolism;ko00040//Pentose and glucuronate interconversions	GO:0030312//external encapsulating structure	GO:0030234//enzyme regulator activity;GO:0052689	GO:0071555;GO:0000272//polysaccharide catabolic process;GO:0044092//negative regulation of molecular function
Unigene0041658	241.425	113.383	-1.09037	1.31031e-182	1.4828e-180	PREDICTED: 21 kDa protein0like [Cicer arietinum]	0	0	0	0
Unigene0008841	13.7788	6.47546	-1.0894	4.6928e-14	2.27965e-12	PREDICTED: cysteine proteinase inhibitor 120like [Cicer arietinum]	0	0	0	0
Unigene0041169	492.695	231.637	-1.08883	0	0	PREDICTED: chalcone00flavonone isomerase0like [Cicer arietinum]	0	GO:0009536//plastid	GO:0016872//intramolecular lyase activity	GO:0009813//flavonoid biosynthetic process;GO:0034285;GO:0009411//response to UV
Unigene0044787	24.6066	11.5753	-1.088	9.32884e-11	2.42747e-09	PREDICTED: DNA ligase 10like [Cicer arietinum]	0	0	0	0
Unigene0037428	1.84024	0.86656	-1.08652	1.00723e-08	2.04567e-07	PREDICTED: stress response protein NST10like [Cicer arietinum]	0	0	0	0
Unigene0045946	28.6397	13.4904	-1.08609	1.81957e-42	1.44185e-40	DNA0binding protein DF1 [Pisum sativum]	0	0	GO:0003676//nucleic acid binding	0
Unigene0043776	33.3071	15.6902	-1.08597	4.01768e-35	3.01645e-33	Dihydroflavonol040reductase [Medicago truncatula]	0	0	0	0
Unigene0011740	4.09296	1.93249	-1.08268	5.05708e-06	6.84661e-05	PREDICTED: uncharacterized LOC101222277 [Cucumis sativus]	0	0	0	0
Unigene0046304	20.7781	9.81524	-1.08197	3.08424e-23	1.95696e-21	PREDICTED: uncharacterized 38.1 kDa protein0like [Cicer arietinum]	0	0	0	0
Unigene0042127	164.233	77.6099	-1.08143	6.36338e-80	6.19095e-78	Mitochondrial protein, putative [Medicago truncatula]	0	0	0	0
Unigene0048330	7.3849	3.49079	-1.08103	2.2878e-05	0.000269568	PREDICTED: cysteine0rich receptor0like protein kinase 100like [Glycine max]	0	GO:0043231//intracellular membrane0bounded organelle	GO:0032550;GO:0004702//receptor signaling protein serine/threonine kinase activity	GO:0032147//activation of protein kinase activity
Unigene0049295	9.51	4.49854	-1.07999	4.88462e-05	0.000535131	F0box/WD repeat0containing protein 4 [Theobroma cacao]	0	0	0	GO:0046474//glycerophospholipid biosynthetic process
Unigene0044725	41.2958	19.5489	-1.07891	1.03776e-11	3.01135e-10	PREDICTED: eggshell protein 2A0like [Cicer arietinum]	0	0	0	0
Unigene0011963	25.6507	12.153	-1.07768	4.79036e-14	2.32543e-12	PREDICTED: uncharacterized 9.5 kDa protein in DHFR 3'region0like isoform X1 [Cicer arietinum]	0	0	0	0
Unigene0046112	11.4962	5.44932	-1.07701	1.98224e-07	3.40161e-06	Auxin0induced protein [Medicago truncatula]	0	0	0	0
Unigene0045875	24.9775	11.8664	-1.07375	1.94658e-21	1.18984e-19	PREDICTED: transcription factor bHLH1370like [Cicer arietinum]	0	0	GO:0005488//binding	0
Unigene0048341	4.70581	2.23782	-1.07235	5.08048e-06	6.8743e-05	Regulator of chromosome condensation (RCC1) family with FYVE zinc finger domain isoform 3 [Theobroma cacao]	0	0	0	0
Unigene0004842	1.99623	0.949609	-1.07188	6.52894e-06	8.66678e-05	BZIP transcription factor bZIP114 [Medicago truncatula]	0	0	0	0
Unigene0052103	3.04529	1.44914	-1.07138	8.39226e-06	0.000109046	Gag0pro0like protein [Theobroma cacao]	0	0	0	0
Unigene0030323	2053.73	977.442	-1.07116	0	0	chloroplast chlorophyll a/b binding protein [Pisum sativum]	ko00196//Photosynthesis 0 antenna proteins	0	0	0
Unigene0047394	7.30698	3.48247	-1.06916	2.29674e-05	0.000270485	RING finger family protein [Medicago truncatula]	0	0	0	0
Unigene0048697	7.95573	3.79752	-1.06694	6.9057e-07	1.09171e-05	PREDICTED: P24 oleosin isoform A0like [Cicer arietinum]	0	GO:0016020//membrane;GO:0044444//cytoplasmic part	0	0
Unigene0042716	38.9055	18.5805	-1.06619	3.95094e-12	1.25458e-10	0	0	0	0	0
Unigene0046462	19.7996	9.46754	-1.06441	4.511e-08	8.48298e-07	PREDICTED: inactive protein kinase SELMODRAFT_4440750like [Cicer arietinum]	0	0	0	0
Unigene0006454	69.6557	33.3901	-1.06082	8.39178e-98	8.45807e-96	Glucan endo01,30beta0glucosidase [Medicago truncatula]	0	0	GO:0008422//beta0glucosidase activity	GO:0044238//primary metabolic process
Unigene0003944	20.2758	9.73071	-1.05914	2.05994e-15	1.07604e-13	TOM1 protein [Medicago truncatula]	0	GO:0031090//organelle membrane	0	GO:0044248//cellular catabolic process;GO:0019079//viral genome replication
Unigene0042270	35.4316	17.0059	-1.059	3.59756e-11	9.69625e-10	PREDICTED: dihydrolipoyllysine0residue acetyltransferase component of pyruvate dehydrogenase complex0like [Cicer arietinum]	0	0	0	0
Unigene0035889	16.6998	8.02085	-1.058	8.88096e-07	1.38061e-05	0	0	0	0	0
Unigene0036121	562.23	270.121	-1.05756	0	0	PREDICTED: extensin030like isoform X1 [Cicer arietinum]	0	0	0	GO:0009987//cellular process
Unigene0002543	2.98705	1.44579	-1.04687	2.00176e-07	3.43259e-06	Serine/threonine protein kinase [Medicago truncatula]	0	GO:0044464//cell part	GO:0032550;GO:0004674//protein serine/threonine kinase activity	GO:0008037//cell recognition;GO:0006468//protein phosphorylation;GO:0007154//cell communication
Unigene0046549	21.8018	10.5638	-1.04531	3.28828e-07	5.44541e-06	Auxin influx protein [Medicago truncatula]	ko04075//Plant hormone signal transduction	GO:0043231//intracellular membrane0bounded organelle;GO:0031224//intrinsic to membrane	GO:0080161//auxin transmembrane transporter activity;GO:0015291//secondary active transmembrane transporter activity;GO:0042562//hormone binding;GO:0046943//carboxylic acid transmembrane transporter activity;GO:0016279//protein0lysine N0methyltransferase activity	GO:0006865//amino acid transport;GO:0009630//gravitropism;GO:0043479;GO:0009639//response to red or far red light;GO:0005976//polysaccharide metabolic process;GO:0045229//external encapsulating structure organization;GO:0051707//response to other organism;GO:0009755//hormone0mediated signaling pathway;GO:0016571//histone methylation;GO:0009791//post0embryonic development;GO:0032535;GO:0009826//un…
Unigene0002663	5.96344	2.89115	-1.0445	4.52986e-08	8.51388e-07	PREDICTED: B2 protein0like [Cicer arietinum]	0	0	0	0
Unigene0003940	92.9929	45.0966	-1.0441	6.90224e-96	6.92686e-94	O0methyltransferase [Medicago truncatula]	0	0	0	0
Unigene0004322	32.1475	15.5933	-1.04378	5.80082e-08	1.07384e-06	0	0	0	0	0
Unigene0004634	10.07	4.89094	-1.04188	4.92864e-14	2.3876e-12	PREDICTED: bidirectional sugar transporter SWEET170like isoform X1 [Cicer arietinum]	0	0	0	0
Unigene0005385	11.6316	5.64941	-1.04188	3.12712e-12	1.01695e-10	Neutral cholesterol ester hydrolase [Medicago truncatula]	0	0	0	0
Unigene0048955	9.27361	4.50857	-1.04046	8.13684e-05	0.000843536	Vacuolar fusion protein MON10like protein [Medicago truncatula]	0	0	0	GO:0072503;GO:0070838//divalent metal ion transport;GO:0051707//response to other organism
Unigene0050394	5.67263	2.75788	-1.04046	8.13684e-05	0.000843661	PREDICTED: uncharacterized LOC101222618 [Cucumis sativus]	0	0	0	0
Unigene0041435	71.7898	34.9076	-1.04024	4.9222e-30	3.51832e-28	PREDICTED: phospho020dehydro030deoxyheptonate aldolase 2, chloroplastic0like [Cicer arietinum]	ko00400//Phenylalanine, tyrosine and tryptophan biosynthesis	GO:0031976	GO:0005488//binding;GO:0016765//transferase activity, transferring alkyl or aryl (other than methyl) groups	GO:0008652//cellular amino acid biosynthetic process;GO:0043650
Unigene0038353	38.6437	18.7957	-1.03983	2.00072e-07	3.43165e-06	Flavonol sulfotransferase0like protein [Medicago truncatula]	0	0	GO:0008146//sulfotransferase activity	0
Unigene0041694	81.922	39.8868	-1.03834	5.0251e-43	3.99097e-41	PREDICTED: ribulose bisphosphate carboxylase/oxygenase activase 2, chloroplastic0like [Cicer arietinum]	0	0	0	0
Unigene0044681	4.14586	2.02068	-1.03683	3.09006e-06	4.34824e-05	Basic 7S globulin [Medicago truncatula]	0	0	0	0
Unigene0026956	37.0285	18.1015	-1.03253	1.17407e-12	4.20462e-11	Elicitor0responsive protein [Medicago truncatula]	0	GO:0044424//intracellular part	0	0
Unigene0048629	4.14504	2.03031	-1.02968	2.402e-06	3.45215e-05	PB1 domain0containing protein [Arabidopsis thaliana]	0	0	0	0
Unigene0004076	30.9329	15.1557	-1.02928	1.20709e-45	9.68562e-44	PREDICTED: transcription factor RF2a0like [Cicer arietinum]	0	0	0	0
Unigene0020634	12.7999	6.27387	-1.0287	8.11268e-05	0.00084153	Mitochondrial ribosomal protein L43 [Medicago truncatula]	0	0	0	0
Unigene0044026	53.51	26.2279	-1.0287	9.17526e-33	6.74415e-31	PREDICTED: probable ADP0ribosylation factor GTPase0activating protein AGD110like [Cicer arietinum]	0	0	0	0
Unigene0005180	14.0145	6.87578	-1.02732	1.55539e-07	2.70558e-06	PREDICTED: V0type proton ATPase subunit e0like [Cicer arietinum]	ko04145//Phagosome;ko00190//Oxidative phosphorylation;ko05120//Epithelial cell signaling in Helicobacter pylori infection;ko05110//Vibrio cholerae infection;ko05323//Rheumatoid arthritis;ko04966//Collecting duct acid secretion	0	0	0
Unigene0035571	5.85258	2.87168	-1.02718	3.95562e-06	5.45985e-05	PREDICTED: uncharacterized LOC101211120 [Cucumis sativus]	0	GO:0009532//plastid stroma	0	0
Unigene0036039	510.943	250.874	-1.0262	2.9639e-214	3.43739e-212	ptxA [Pisum sativum]	0	0	0	0
Unigene0003617	10.5719	5.19568	-1.02484	1.30985e-08	2.62529e-07	Ethylene receptor [Medicago truncatula]	0	0	0	0
Unigene0046610	20.8747	10.2722	-1.02302	1.23665e-23	7.93278e-22	Transmembrane protein adipocyte0associated 1 isoform 2 [Theobroma cacao]	0	0	0	0
Unigene0041799	85.7151	42.1842	-1.02285	2.89328e-39	2.24691e-37	Fructose0bisphosphate aldolase [Medicago truncatula]	ko00010//Glycolysis / Gluconeogenesis;ko00030//Pentose phosphate pathway;ko00051//Fructose and mannose metabolism;ko00710//Carbon fixation in photosynthetic organisms	0	0	0
Unigene0003766	169.882	83.7138	-1.02099	1.02422e-163	1.14063e-161	Dihydrofolate reductase [Medicago truncatula]	0	0	GO:0046872//metal ion binding	0
Unigene0083012	14.3231	7.06501	-1.01958	1.12758e-14	5.71533e-13	PREDICTED: tetraspanin020like [Cicer arietinum]	0	0	0	0
Unigene0041939	170.461	84.1068	-1.01915	1.46532e-208	1.67994e-206	Fumarylacetoacetase [Medicago truncatula]	ko00350//Tyrosine metabolism;ko00643//Styrene degradation	0	0	0
Unigene0046930	15.6255	7.71876	-1.01746	8.07426e-05	0.000837793	PREDICTED: probable methyltransferase PMT130like [Cicer arietinum]	0	GO:0043231//intracellular membrane0bounded organelle;GO:0031224//intrinsic to membrane	GO:0008168//methyltransferase activity	GO:0009664//plant0type cell wall organization;GO:0008152//metabolic process
Unigene0041620	83.9281	41.5242	-1.0152	2.45e-47	2.00257e-45	Ribosomal protein S10 [Medicago truncatula]	0	0	0	0
Unigene0003812	25.2947	12.5183	-1.0148	2.93118e-05	0.000336877	chloroplast protein import component Toc159 [Pisum sativum]	0	0	GO:0005488//binding	0
Unigene0047935	14.5026	7.18193	-1.01387	3.78552e-09	8.11668e-08	Chlororespiratory reduction 7 isoform 1 [Theobroma cacao]	0	0	0	0
Unigene0010789	8.67441	4.30442	-1.01095	9.36892e-08	1.68667e-06	Senescence0associated protein DIN1 [Medicago truncatula]	0	GO:0009536//plastid	GO:0005488//binding	GO:0009725//response to hormone stimulus;GO:0006950//response to stress;GO:0009746;GO:0044767;GO:0034285
Unigene0010309	122.411	60.7843	-1.00996	1.2902e-46	1.04724e-44	Actin depolymerizing factor0like protein [Medicago truncatula]	ko04810//Regulation of actin cytoskeleton;ko04666//Fc gamma R0mediated phagocytosis;ko04360//Axon guidance	GO:0005856//cytoskeleton;GO:0009536//plastid;GO:0005911//cell0cell junction;GO:0016020//membrane	GO:0008092//cytoskeletal protein binding	GO:0006007//glucose catabolic process;GO:0010038//response to metal ion;GO:0002218//activation of innate immune response;GO:0008154//actin polymerization or depolymerization;GO:0006970//response to osmotic stress
Unigene0042401	102.958	51.2281	-1.00705	2.19806e-182	2.48342e-180	Scarecrow [Medicago truncatula]	0	0	0	0
Unigene0004829	9.5116	4.73491	-1.00635	7.2795e-08	1.33035e-06	50S ribosomal protein L36 [Medicago truncatula]	ko03010//Ribosome	0	0	0
Unigene0042724	97.1315	48.4076	-1.0047	2.17762e-20	1.30265e-18	AT5g25460/F18G18_200 [Arabidopsis thaliana]	0	GO:0005911//cell0cell junction;GO:0005618//cell wall	0	GO:0009628//response to abiotic stimulus;GO:0009653//anatomical structure morphogenesis
Unigene0022078	10.2943	5.13569	-1.00321	4.12256e-07	6.73778e-06	cytochrome P450 monooxygenase CYP83E8 [Medicago truncatula]	0	0	0	0
Unigene0048003	8.40043	4.19399	-1.00214	6.11408e-09	1.28114e-07	Os08g0107100 [Oryza sativa Japonica Group]	0	0	0	0
Unigene0049384	5.54293	2.76861	-1.00149	4.99346e-06	6.77488e-05	Lipoxygenase [Medicago truncatula]	ko00592//alpha0Linolenic acid metabolism;ko00591//Linoleic acid metabolism	0	GO:0046914//transition metal ion binding;GO:0016702//oxidoreductase activity, acting on single donors with incorporation of molecular oxygen, incorporation of two atoms of oxygen	GO:0006633//fatty acid biosynthetic process
Unigene0009484	443.734	221.679	-1.00122	0	0	Tubulin beta chain [Medicago truncatula]	ko04145//Phagosome;ko04540//Gap junction;ko05130//Pathogenic Escherichia coli infection	0	0	0
Unigene0048729	7.99545	15.9972	1.00057	9.10376e-10	2.09773e-08	Abhydrolase domain0containing protein [Medicago truncatula]	0	GO:0043231//intracellular membrane0bounded organelle	GO:0003824//catalytic activity	0
Unigene0005590	13.3017	26.6138	1.00057	9.10376e-10	2.09842e-08	0	0	0	0	0
Unigene0041365	28.7497	57.5334	1.00085	3.19336e-10	7.76168e-09	0	0	0	0	0
Unigene0025707	3.22113	6.44637	1.00092	1.49889e-08	2.98537e-07	0	0	0	0	0
Unigene0016013	1.9459	3.89457	1.00103	7.2155e-07	1.13709e-05	Pentatricopeptide repeat0containing protein [Medicago truncatula]	0	GO:0009536//plastid	0	GO:0003006//developmental process involved in reproduction
Unigene0028836	4.87239	9.7566	1.00175	1.23791e-05	0.000155513	0	0	0	0	0
Unigene0051325	3.10699	6.22333	1.00217	4.24884e-06	5.84499e-05	PREDICTED: transcription factor HBP01b(c1)0like [Glycine max]	0	0	GO:0003677//DNA binding	GO:0010467//gene expression
Unigene0015937	2.38241	4.77258	1.00235	2.76418e-11	7.58136e-10	PREDICTED: golgin candidate 10like [Cicer arietinum]	0	GO:0043231//intracellular membrane0bounded organelle;GO:0016020//membrane	0	GO:0006402//mRNA catabolic process
Unigene0036905	3.20339	6.41797	1.00252	1.46419e-06	2.19156e-05	Ataxin02 [Medicago truncatula]	0	0	0	0
Unigene0005806	9.65653	19.3518	1.00289	4.51934e-10	1.07752e-08	0	0	0	0	0
Unigene0048957	10.9815	22.0096	1.00305	1.58628e-10	4.00135e-09	0	0	0	0	0
Unigene0003210	3.02187	6.05822	1.00345	7.4366e-05	0.000778432	0	0	0	0	0
Unigene0013379	4.75298	9.53237	1.004	4.50972e-13	1.81553e-11	expressed protein [Oryza sativa Japonica Group]	0	0	0	0
Unigene0033897	2.72404	5.46397	1.0042	2.97548e-06	4.20475e-05	0	0	0	0	0
Unigene0015675	8.4546	16.9812	1.00613	3.6767e-09	7.90513e-08	PREDICTED: proline0rich receptor0like protein kinase PERK100like [Cicer arietinum]	0	0	0	0
Unigene0017506	3.66816	7.36755	1.00613	1.28694e-09	2.92597e-08	0	0	0	0	0
Unigene0036963	3.81577	7.66402	1.00613	2.49426e-07	4.21115e-06	RNA binding protein [Medicago truncatula]	0	GO:0043231//intracellular membrane0bounded organelle	0	0
Unigene0038942	18.1312	36.4167	1.00613	1.96545e-11	5.50051e-10	0	0	0	0	0
Unigene0048043	4.02204	8.08112	1.00663	0	0	PREDICTED: centromere0associated protein E0like isoform X1 [Cicer arietinum]	0	GO:0005875//microtubule associated complex;GO:0005911//cell0cell junction	GO:0032550;GO:0003774//motor activity;GO:0015631//tubulin binding	GO:0007349//cellularization;GO:0048229//gametophyte development;GO:0000226//microtubule cytoskeleton organization;GO:0033206//cytokinesis after meiosis
Unigene0048010	8.51872	17.1226	1.00719	0	0	PREDICTED: 70 kDa peptidyl0prolyl isomerase0like isoform X2 [Cicer arietinum]	0	0	GO:0016859//cis0trans isomerase activity	GO:0018208//peptidyl0proline modification
Unigene0030642	14.8683	29.8922	1.00753	3.42614e-13	1.42432e-11	0	0	0	0	0
Unigene0007261	1.8015	3.62222	1.00768	1.75132e-07	3.03059e-06	0	0	0	0	0
Unigene0005785	3.46824	6.97568	1.00813	4.23878e-06	5.8323e-05	Dof21 [Medicago truncatula]	0	0	0	0
Unigene0011480	11.5507	23.2354	1.00834	0	0	PREDICTED: uncharacterized LOC101223218 [Cucumis sativus]	0	GO:0043231//intracellular membrane0bounded organelle	0	0
Unigene0004807	1.17917	2.37439	1.00979	3.66636e-09	7.88532e-08	Kinase superfamily protein isoform 1 [Theobroma cacao]	0	0	0	0
Unigene0044209	22.5066	45.3629	1.01116	7.82294e-11	2.05086e-09	0	0	0	0	0
Unigene0044478	17.6132	35.5063	1.01142	2.23324e-10	5.54345e-09	0	0	0	0	0
Unigene0037257	80.8593	163.024	1.01159	8.63532e-13	3.19881e-11	0	0	0	0	0
Unigene0037972	6.03315	12.1655	1.01181	2.07846e-06	3.0125e-05	PREDICTED: ubiquitin carboxyl0terminal hydrolase 170like [Glycine max]	0	0	GO:0043169//cation binding;GO:0016790//thiolester hydrolase activity;GO:0019783//small conjugating protein0specific protease activity	GO:0048827//phyllome development;GO:0019941//modification0dependent protein catabolic process;GO:0006402//mRNA catabolic process;GO:0006486//protein glycosylation;GO:0009791//post0embryonic development;GO:0022622
Unigene0032050	8.01127	16.1658	1.01284	3.68594e-14	1.80937e-12	PREDICTED: probable starch synthase 4, chloroplastic/amyloplastic0like [Cicer arietinum]	0	GO:0009536//plastid	GO:0046527//glucosyltransferase activity	GO:0005982//starch metabolic process;GO:0071555;GO:0009247//glycolipid biosynthetic process;GO:0006950//response to stress
Unigene0045461	10.3884	20.9638	1.01293	0	0	PREDICTED: kinesin040like isoform X1 [Cicer arietinum]	0	GO:0005875//microtubule associated complex	GO:0032550;GO:0003774//motor activity;GO:0015631//tubulin binding	GO:0007017//microtubule0based process
Unigene0043808	43.5505	87.8881	1.01298	6.81676e-14	3.25721e-12	0	0	0	0	0
Unigene0022248	2.81034	5.67191	1.01309	1.76223e-05	0.000214458	0	0	0	0	0
Unigene0014272	3.07783	6.21557	1.01397	5.16908e-05	0.000562862	Fasciclin0like arabinogalactan protein [Medicago truncatula]	0	0	0	0
Unigene0030838	3.12411	6.30904	1.01397	5.16908e-05	0.000562949	Lysosomal alpha0mannosidase [Medicago truncatula]	ko04142//Lysosome;ko00511//Other glycan degradation	GO:0005618//cell wall;GO:0009536//plastid;GO:0031090//organelle membrane	GO:0046914//transition metal ion binding;GO:0015923//mannosidase activity	GO:0022610;GO:0010053//root epidermal cell differentiation;GO:0007015//actin filament organization;GO:0019318//hexose metabolic process;GO:0009409//response to cold;GO:0045229//external encapsulating structure organization;GO:0000904//cell morphogenesis involved in differentiation
Unigene0030261	7.33	14.807	1.01439	3.53222e-07	5.8287e-06	0	0	0	0	0
Unigene0020550	4.62738	9.35519	1.01557	1.56789e-10	3.96208e-09	PREDICTED: histone0lysine N0methyltransferase EZA10like [Cicer arietinum]	0	0	0	0
Unigene0041027	5.37167	10.8629	1.01597	2.95772e-06	4.18049e-05	Integrase core domain containing protein [Solanum demissum]	0	GO:0043231//intracellular membrane0bounded organelle;GO:0005911//cell0cell junction;GO:0044444//cytoplasmic part	GO:0003676//nucleic acid binding;GO:0046914//transition metal ion binding	GO:0006259//DNA metabolic process;GO:0003006//developmental process involved in reproduction
Unigene0038040	7.94209	16.0685	1.01664	7.1538e-07	1.12813e-05	0	0	0	0	0
Unigene0039122	15.5382	31.4472	1.01711	6.68954e-12	2.00512e-10	0	0	0	0	0
Unigene0030921	583.442	1181.02	1.01738	0	0	vegetative lectin [Pisum sativum]	0	0	0	0
Unigene0037268	107.496	217.627	1.01757	9.35918e-13	3.42888e-11	PREDICTED: histone H40like isoform X2 [Setaria italica]	ko05322//Systemic lupus erythematosus	0	0	0
Unigene0037271	57.0656	115.652	1.0191	0	0	0	0	0	0	0
Unigene0031107	5.20513	10.5504	1.01929	1.80285e-09	4.02063e-08	PREDICTED: pentatricopeptide repeat0containing protein At5g618000like [Cicer arietinum]	0	GO:0043231//intracellular membrane0bounded organelle	0	0
Unigene0044611	33.5867	68.1029	1.01983	2.788e-12	9.20342e-11	PREDICTED: anaphase0promoting complex subunit cdc200like [Cicer arietinum]	ko04120//Ubiquitin mediated proteolysis;ko04110//Cell cycle;ko04114//Oocyte meiosis;ko04111//Cell cycle 0 yeast;ko04113//Meiosis 0 yeast	0	0	0
Unigene0037602	32.1921	65.29	1.02015	4.39204e-13	1.77837e-11	0	0	0	0	0
Unigene0045267	27.0126	54.8101	1.02081	0	0	Zinc finger, RING0type [Medicago truncatula]	0	GO:0009536//plastid	GO:0046914//transition metal ion binding	0
Unigene0046833	10.8306	21.9951	1.02207	1.0372e-08	2.10351e-07	PREDICTED: kinesin0related protein 40like isoform X2 [Cicer arietinum]	0	0	0	0
Unigene0005589	10.9267	22.2012	1.02278	6.99396e-12	2.09099e-10	PREDICTED: uncharacterized protein LOC101498248 isoform X1 [Cicer arietinum]	0	0	0	0
Unigene0037607	435.275	884.438	1.02283	0	0	Histone superfamily protein [Theobroma cacao]	ko05322//Systemic lupus erythematosus	0	0	0
Unigene0030725	18.6961	38.0106	1.02366	7.71856e-11	2.02425e-09	0	0	0	0	0
Unigene0006341	2.40909	4.89824	1.02377	8.5681e-06	0.000111146	0	0	0	0	0
Unigene0043898	10.7139	21.7838	1.02377	8.5681e-06	0.000111166	0	0	0	0	0
Unigene0051084	2.52574	5.13639	1.02405	3.58928e-05	0.000404807	0	0	0	0	0
Unigene0033966	21.4499	43.6242	1.02416	3.33266e-12	1.07333e-10	0	0	0	0	0
Unigene0005108	15.3073	31.1643	1.02567	5.16254e-13	2.04081e-11	PREDICTED: serine0rich adhesin for platelets0like [Cicer arietinum]	0	0	0	0
Unigene0035989	2.45016	4.98906	1.02589	2.5036e-05	0.000292535	0	0	0	0	0
Unigene0046106	9.52868	19.4068	1.02621	1.03217e-08	2.0939e-07	hypothetical protein MTR_7g092340 [Medicago truncatula]	0	0	0	0
Unigene0045286	15.3355	31.2445	1.02673	2.65122e-13	1.13241e-11	Mitogen activated protein kinase 2001 [Medicago truncatula]	0	0	0	0
Unigene0029701	5.30152	10.8079	1.02761	1.7473e-05	0.000213197	PREDICTED: uncharacterized LOC101204957 [Cucumis sativus]	0	0	0	0
Unigene0051813	2.21036	4.50832	1.02831	2.93102e-06	4.14862e-05	0	0	0	0	0
Unigene0003256	4.74688	9.68371	1.02858	7.35604e-05	0.000771036	PREDICTED: uncharacterized LOC101208874 [Cucumis sativus]	0	0	0	0
Unigene0082916	0.726561	1.48284	1.02921	1.2201e-05	0.000153469	PREDICTED: zinc finger protein ZPR10like isoform 2 [Glycine max]	0	0	0	0
Unigene0037260	112.397	229.541	1.03015	1.12199e-12	4.04084e-11	0	0	0	0	0
Unigene0038949	6.1758	12.6148	1.03042	5.12322e-05	0.000558476	0	0	0	0	0
Unigene0049155	10.3851	21.2145	1.03053	6.70796e-13	2.56348e-11	0	0	0	0	0
Unigene0042774	2.16818	4.42926	1.03058	1.77642e-09	3.96422e-08	copper amine oxidase [Pisum sativum]	0	0	GO:0046914//transition metal ion binding;GO:0016641//oxidoreductase activity, acting on the CH0NH2 group of donors, oxygen as acceptor;GO:0048037//cofactor binding	GO:0044710;GO:1901564
Unigene0009138	0.909688	1.85852	1.03071	3.08558e-10	7.51798e-09	PREDICTED: trichohyalin0like [Cicer arietinum]	0	0	0	0
Unigene0033042	2.15687	4.40656	1.03071	8.52388e-06	0.000110654	PREDICTED: uncharacterized protein LOC100783295 [Glycine max]	0	0	0	0
Unigene0041120	9.1313	18.657	1.03082	5.3817e-11	1.43176e-09	RING finger0like protein [Medicago truncatula]	0	0	0	0
Unigene0009000	0.764034	1.56247	1.03212	3.57052e-05	0.00040295	PREDICTED: golgin subfamily A member 30like isoform X1 [Cicer arietinum]	0	0	0	0
Unigene0050268	2.39716	4.90225	1.03212	3.57052e-05	0.000403015	0	0	0	0	0
Unigene0009877	5.02629	10.2789	1.03212	3.57052e-05	0.000402886	0	0	0	0	0
Unigene0016436	40.6727	83.1926	1.03239	0	0	PREDICTED: probable histone H2B.10like [Cicer arietinum]	ko05322//Systemic lupus erythematosus	GO:0043231//intracellular membrane0bounded organelle;GO:0000785//chromatin	GO:0003676//nucleic acid binding;GO:0046983//protein dimerization activity	GO:0034728//nucleosome organization
Unigene0035372	9.44334	19.3253	1.03312	1.20292e-07	2.12786e-06	TMV resistance protein N [Medicago truncatula]	0	0	GO:0097159;GO:0043167//ion binding;GO:1901363	GO:0009987//cellular process
Unigene0039159	5.55037	11.3586	1.03312	1.20292e-07	2.1284e-06	0	0	0	0	0
Unigene0021640	24.7633	50.7184	1.0343	0	0	PREDICTED: 30ketoacyl0CoA synthase 110like [Cicer arietinum]	0	0	GO:0016746//transferase activity, transferring acyl groups	GO:0006631//fatty acid metabolic process
Unigene0026879	4.49428	9.20735	1.0347	2.91422e-06	4.12734e-05	0	0	0	0	0
Unigene0037389	10.7326	21.9922	1.035	5.92724e-08	1.09406e-06	0	0	0	0	0
Unigene0035912	5.14766	10.5545	1.03587	2.03938e-06	2.96076e-05	0	0	0	0	0
Unigene0037348	27.5206	56.4744	1.03709	4.50972e-13	1.81657e-11	0	0	0	0	0
Unigene0036636	51.631	105.964	1.03726	5.81756e-13	2.26649e-11	Chalcone synthase [Medicago truncatula]	ko04712//Circadian rhythm 0 plant;ko00941//Flavonoid biosynthesis	GO:0000325//plant0type vacuole	GO:0016747//transferase activity, transferring acyl groups other than amino0acyl groups	GO:0009411//response to UV;GO:0060918//auxin transport;GO:0009725//response to hormone stimulus;GO:0009718//anthocyanin biosynthetic process;GO:0009699//phenylpropanoid biosynthetic process;GO:0034285;GO:0006950//response to stress
Unigene0035614	6.59455	13.5345	1.03729	1.70365e-07	2.95175e-06	0	0	0	0	0
Unigene0004704	2.61064	5.3595	1.0377	2.49432e-09	5.4807e-08	PREDICTED: vesicle0associated protein 4020like isoform X1 [Cicer arietinum]	0	0	0	0
Unigene0086832	8.10887	16.65	1.03795	3.74536e-11	1.00791e-09	Multidrug resistance protein ABC transporter family [Medicago truncatula]	0	0	0	0
Unigene0015657	1.38977	2.85579	1.03904	5.09204e-05	0.000555336	Ripening regulated protein DDTFR18 [Medicago truncatula]	0	0	GO:0015291//secondary active transmembrane transporter activity	GO:0015893//drug transport;GO:0044763
Unigene0028805	2.7306	5.61101	1.03904	5.92046e-06	7.92665e-05	0	0	0	0	0
Unigene0010345	6.30229	12.9503	1.03904	5.09204e-05	0.000555422	0	0	0	0	0
Unigene0037452	4.99377	10.2615	1.03904	5.09204e-05	0.000555509	0	0	0	0	0
Unigene0004043	44.4834	91.4377	1.03952	9.35252e-13	3.42823e-11	0	0	0	0	0
Unigene0084036	2.78149	5.72115	1.04045	3.54802e-05	0.000400605	PREDICTED: bifunctional nuclease 10like isoform X2 [Cicer arietinum]	0	0	0	0
Unigene0083739	16.3749	33.6983	1.04119	4.85168e-13	1.93539e-11	0	0	0	0	0
Unigene0005923	12.4227	25.5749	1.04175	3.33066e-13	1.38875e-11	Epoxide hydrolase [Medicago truncatula]	0	0	0	0
Unigene0007572	1.7001	3.50124	1.04225	2.02566e-06	2.94267e-05	PREDICTED: pentatricopeptide repeat0containing protein At2g176700like isoform X1 [Cicer arietinum]	0	0	0	0
Unigene0035568	11.1177	22.8987	1.04241	1.38556e-13	6.282e-12	PREDICTED: uncharacterized protein LOC100806894 [Glycine max]	0	0	0	0
Unigene0039136	7.78594	16.0407	1.0428	1.43268e-08	2.86001e-07	0	0	0	0	0
Unigene0043599	35.2936	72.7292	1.04313	9.12604e-14	4.25896e-12	0	0	0	0	0
Unigene0034838	9.7609	20.1151	1.0432	9.05786e-12	2.65479e-10	ORF1 [Pisum sativum]	0	0	0	0
Unigene0002670	2.01866	4.16046	1.04335	1.18696e-07	2.10228e-06	UDP0sugar transporter sqv07 [Medicago truncatula]	0	GO:0031224//intrinsic to membrane;GO:0043231//intracellular membrane0bounded organelle	GO:0015165//pyrimidine nucleotide sugar transmembrane transporter activity	GO:0015785//UDP0galactose transport;GO:0048468//cell development;GO:0048528//post0embryonic root development
Unigene0041743	19.783	40.7759	1.04346	1.59206e-13	7.12147e-12	0	0	0	0	0
Unigene0041263	21.3781	44.0681	1.0436	7.43746e-11	1.95419e-09	0	0	0	0	0
Unigene0034132	10.8755	22.4222	1.04385	0	0	0	0	0	0	0
Unigene0002032	6.00371	12.3801	1.04409	1.20459e-05	0.000151791	0	0	0	0	0
Unigene0014279	3.62818	7.48156	1.04409	1.39888e-14	7.05474e-13	Chloroplast unusual positioning 1A [Medicago truncatula]	0	0	0	0
Unigene0045627	10.2244	21.0834	1.04409	8.329e-08	1.51111e-06	0	0	0	0	0
Unigene0086950	6.05251	12.4869	1.04481	5.84596e-08	1.08106e-06	0	0	0	0	0
Unigene0010654	5.36138	11.0621	1.04495	6.95422e-07	1.09889e-05	Pleckstrin homology (PH) domain0containing protein0like protein [Medicago truncatula]	0	0	0	GO:0050794//regulation of cellular process
Unigene0007133	15.7739	32.5654	1.0458	0	0	Os01g0166500 [Oryza sativa Japonica Group]	0	0	0	0
Unigene0029982	8.15616	16.8456	1.04641	1.72923e-09	3.86506e-08	PREDICTED: B3 domain0containing protein At3g191840like [Cicer arietinum]	0	GO:0043231//intracellular membrane0bounded organelle	GO:0003676//nucleic acid binding	GO:0006351//transcription, DNA0dependent
Unigene0002861	3.81743	7.89287	1.04795	6.018e-10	1.41652e-08	NADH dehydrogenase subunit 2 (mitochondrion) [Beta vulgaris subsp. maritima]	ko00190//Oxidative phosphorylation;ko05012//Parkinson's disease	GO:0043231//intracellular membrane0bounded organelle	GO:0050136//NADH dehydrogenase (quinone) activity	GO:0022904//respiratory electron transport chain
Unigene0084668	8.99506	18.598	1.04795	5.05512e-05	0.000552169	0	0	0	0	0
Unigene0033034	7.29757	15.0982	1.04888	2.9805e-10	7.27207e-09	PREDICTED: ribosome biogenesis protein BRX1 homolog [Cicer arietinum]	0	0	0	0
Unigene0011568	3.56063	7.36852	1.04924	8.26424e-08	1.50091e-06	Oligopeptidase A [Medicago truncatula]	0	0	0	0
Unigene0015356	4.84274	10.0224	1.04933	2.09786e-10	5.2185e-09	0	0	0	0	0
Unigene0047348	2.84521	5.88878	1.04943	0	0	PREDICTED: probable LRR receptor0like serine/threonine0protein kinase At2g162500like [Cicer arietinum]	0	0	0	0
Unigene0044138	11.4219	23.6456	1.04976	1.4768e-10	3.74812e-09	PREDICTED: momilactone A synthase0like [Glycine max]	0	0	0	0
Unigene0037610	86.1057	178.27	1.04988	0	0	PREDICTED: probable histone H2B.10like [Cicer arietinum]	ko05322//Systemic lupus erythematosus	GO:0043231//intracellular membrane0bounded organelle;GO:0000785//chromatin	GO:0003676//nucleic acid binding;GO:0046983//protein dimerization activity	GO:0034728//nucleosome organization
Unigene0005922	80.05	165.803	1.05049	3.43726e-13	1.42556e-11	0	0	0	0	0
Unigene0006565	1.43939	2.98232	1.05098	1.71238e-05	0.000209265	hypothetical protein MTR_7g024810 [Medicago truncatula]	0	0	0	0
Unigene0045527	8.63391	17.8889	1.05098	6.89908e-07	1.09091e-05	0	0	0	0	0
Unigene0045354	17.8198	36.9727	1.05298	6.96176e-09	1.45052e-07	0	0	0	0	0
Unigene0039034	2.37972	4.93902	1.05343	1.66516e-07	2.88791e-06	0	0	0	0	0
Unigene0039733	9.45585	19.6252	1.05343	5.83006e-06	7.81907e-05	PREDICTED: early light0induced protein, chloroplastic0like [Cicer arietinum]	0	0	0	0
Unigene0039195	6.82242	14.1621	1.05368	7.32748e-15	3.74386e-13	0	0	0	0	0
Unigene0004784	14.815	30.7611	1.05405	2.07744e-12	7.02668e-11	0	0	0	0	0
Unigene0002453	3.12362	6.48771	1.05449	8.19424e-08	1.48936e-06	0	0	0	0	0
Unigene0004351	14.4618	30.0438	1.05482	2.84938e-06	4.04532e-05	0	0	0	0	0
Unigene0046563	16.0149	33.2719	1.05489	9.32588e-15	4.73726e-13	S0adenosylmethionine decarboxylase [Citrus sinensis]	ko00330//Arginine and proline metabolism;ko00270//Cysteine and methionine metabolism	0	GO:0016831//carboxy0lyase activity	GO:0006596//polyamine biosynthetic process;GO:0044272
Unigene0036345	14.1481	29.394	1.05491	6.6791e-13	2.55664e-11	30hydroxyisobutyryl0CoA hydrolase0like protein [Medicago truncatula]	ko00280//Valine, leucine and isoleucine degradation;ko00410//beta0Alanine metabolism;ko00640//Propanoate metabolism	GO:0043231//intracellular membrane0bounded organelle	GO:0016289//CoA hydrolase activity;GO:0016836//hydro0lyase activity	GO:0009908//flower development;GO:0009639//response to red or far red light;GO:0000338//protein deneddylation;GO:0009062//fatty acid catabolic process;GO:0016571//histone methylation;GO:0051319;GO:0006221//pyrimidine nucleotide biosynthetic process
Unigene0021951	1.96614	4.08637	1.05545	4.03634e-08	7.64993e-07	Parallel spindle [Medicago truncatula]	0	0	0	GO:0044763;GO:0044260;GO:0010468//regulation of gene expression;GO:0044238//primary metabolic process
Unigene0027194	47.4647	98.7053	1.05627	0	0	histone H1 [Pisum sativum]	0	GO:0000785//chromatin;GO:0043231//intracellular membrane0bounded organelle	GO:0003676//nucleic acid binding	GO:0034728//nucleosome organization
Unigene0009190	2.31956	4.82386	1.05634	7.20094e-05	0.000756704	0	0	0	0	0
Unigene0026084	9.82544	20.4449	1.05715	6.83872e-07	1.08186e-05	0	0	0	0	0
Unigene0033967	54.4535	113.367	1.0579	0	0	0	0	0	0	0
Unigene0050516	2.70926	5.64041	1.0579	3.49136e-05	0.000394844	0	0	0	0	0
Unigene0037600	58.8075	122.442	1.05803	0	0	0	0	0	0	0
Unigene0045159	16.6537	34.6814	1.05832	3.5661e-11	9.61516e-10	0	0	0	0	0
Unigene0006782	4.41456	9.19918	1.05924	1.69724e-05	0.000207559	PREDICTED: growth0regulating factor 50like isoform X1 [Cicer arietinum]	0	GO:0043231//intracellular membrane0bounded organelle	GO:0032550;GO:0016817//hydrolase activity, acting on acid anhydrides	GO:0006351//transcription, DNA0dependentUnigene0006783
Unigene0010336	1.75909	3.66565	1.05924	1.69724e-05	0.000207595	PREDICTED: seven transmembrane protein 10like [Cicer arietinum]	0	0	0	0
Unigene0024879	12.0845	25.2012	1.06034	0	0	DNA cross0link repair 1A protein [Medicago truncatula]	0	0	0	0
Unigene0004804	13.6958	28.5641	1.06047	0	0	Cytokinin dehydrogenase [Medicago truncatula]	ko00908//Zeatin biosynthesis	0	0	0
Unigene0018176	1.99654	4.16431	1.06057	3.99878e-08	7.5849e-07	0	0	0	0	0
Unigene0005335	7.66638	15.9912	1.06066	0	0	PREDICTED: histone H3.v10like [Cicer arietinum]	0	0	0	0
Unigene0044463	21.5333	44.9285	1.06106	2.68674e-13	1.1434e-11	B0like cyclin [Medicago sativa subsp. x varia]	ko04110//Cell cycle;ko04914//Progesterone0mediated oocyte maturation;ko04115//p53 signaling pathway	0	0	0
Unigene0035389	6.78939	14.1805	1.06255	2.91322e-13	1.23007e-11	T6D22.19 [Arabidopsis thaliana]	0	0	GO:0005488//binding	0
Unigene0039605	4.44728	9.29886	1.06413	3.32462e-07	5.50429e-06	0	0	0	0	0
Unigene0005870	2.78737	5.83174	1.06502	1.14588e-07	2.03571e-06	0	0	0	0	0
Unigene0034708	29.6507	62.0522	1.06542	4.32986e-14	2.11066e-12	0	0	0	0	0
Unigene0026247	7.87766	16.4896	1.06572	0	0	0	0	0	0	0
Unigene0035148	5.28639	11.0696	1.06625	7.13144e-05	0.000750301	0	0	0	0	0
Unigene0087086	1.48668	3.11308	1.06625	7.13144e-05	0.000750413	0	0	0	0	0
Unigene0042011	56.5632	118.471	1.0666	0	0	0	0	0	0	0
Unigene0004641	1.05031	2.20056	1.06706	3.45702e-05	0.000391339	PREDICTED: flowering time control protein FCA0like [Glycine max]	0	0	0	0
Unigene0005541	5.60661	11.7572	1.06834	2.84272e-10	6.95043e-09	PREDICTED: pre0mRNA branch site p140like protein0like [Cicer arietinum]	ko03040//Spliceosome	0	0	0
Unigene0017605	2.22492	4.66571	1.06834	2.84272e-10	6.95285e-09	PREDICTED: myosin090like [Cicer arietinum]	0	0	0	0
Unigene0017258	4.15918	8.72189	1.06834	8.18588e-06	0.000106741	0	0	0	0	0
Unigene0003450	10.3894	21.7928	1.06874	0	0	WW domain containing protein expressed [Medicago truncatula]	0	0	0	0
Unigene0033906	15.5055	32.5409	1.06948	0	0	PREDICTED: mitogen0activated protein kinase kinase kinase 30like [Cicer arietinum]	0	0	GO:0016491//oxidoreductase activity;GO:0004672//protein kinase activity;GO:0032550	GO:0006796//phosphate0containing compound metabolic process;GO:0006464//protein modification process
Unigene0047574	20.1414	42.2814	1.06986	1.08935e-12	3.93746e-11	Nuclease S1 [Medicago truncatula]	0	0	0	0
Unigene0011548	12.5438	26.339	1.07022	6.79456e-14	3.24882e-12	0	0	0	0	0
Unigene0035555	6.48716	13.6233	1.07042	2.30568e-07	3.91826e-06	FCA gamma [Pisum sativum]	0	0	0	0
Unigene0042719	16.1278	33.8766	1.07074	0	0	Zinc finger0homeodomain protein [Medicago truncatula]	0	0	0	0
Unigene0048183	4.77884	10.045	1.07175	4.70146e-09	9.9828e-08	Protein regulator of cytokinesis [Medicago truncatula]	0	0	0	0
Unigene0037808	3.33427	7.01064	1.07218	8.07622e-10	1.87639e-08	0	0	0	0	0
Unigene0030426	7.02265	14.7695	1.07254	1.39312e-10	3.55249e-09	0	0	0	0	0
Unigene0045687	10.0513	21.1519	1.07341	6.2017e-13	2.3988e-11	DNA polymerase [Medicago truncatula]	0	GO:0043231//intracellular membrane0bounded organelle	0	0
Unigene0023020	10.6282	22.3739	1.07391	0	0	glutathione synthetase precursor [Pisum sativum]	ko00480//Glutathione metabolism	0	GO:0016881//acid0amino acid ligase activity;GO:0043167//ion binding;GO:0032550	GO:0006749//glutathione metabolic process
Unigene0037259	119.528	251.762	1.07471	5.16254e-13	2.04311e-11	0	0	0	0	0
Unigene0043204	38.2846	80.6599	1.07509	0	0	0	0	0	0	0
Unigene0016522	1.61047	3.39638	1.07652	4.90842e-05	0.000537234	0	0	0	0	0
Unigene0030711	2.55158	5.38112	1.07652	3.2661e-09	7.07662e-08	PREDICTED: uncharacterized LOC101215960 [Cucumis sativus]	0	0	GO:0031406//carboxylic acid binding	0
Unigene0045533	8.50402	17.9344	1.07652	0	0	PREDICTED: bidirectional sugar transporter SWEET10like [Cicer arietinum]	0	GO:0043231//intracellular membrane0bounded organelle;GO:0016021//integral to membrane	GO:0015144//carbohydrate transmembrane transporter activity	GO:0044765
Unigene0051002	1.85618	3.91458	1.07652	3.41858e-05	0.000387301	Mitogen0activated protein kinase kinase kinase A [Medicago truncatula]	0	0	GO:0032550;GO:0004672//protein kinase activity	GO:0006464//protein modification process;GO:0016310//phosphorylation
Unigene0051105	3.03197	6.39424	1.07652	5.65358e-06	7.59692e-05	0	0	0	0	0
Unigene0085223	0.860554	1.81485	1.07652	2.38252e-05	0.0002796	PREDICTED: metal tolerance protein 10like isoform X1 [Cicer arietinum]	0	0	0	0
Unigene0086588	0.893502	1.88434	1.07652	2.38252e-05	0.000279553	PREDICTED: mutS2 protein0like isoform X2 [Cicer arietinum]	0	0	0	0
Unigene0005596	5.33271	11.2463	1.07652	2.13384e-13	9.33042e-12	PREDICTED: probable galacturonosyltransferase0like 10like [Cicer arietinum]	0	0	0	0
Unigene0027389	3.70673	7.81726	1.07652	9.46272e-07	1.46422e-05	nucleic acid binding protein, putative [Ricinus communis]	0	0	0	0
Unigene0039297	2.08118	4.38907	1.07652	3.41858e-05	0.000387238	0	0	0	0	0
Unigene0039604	17.405	36.706	1.07652	0	0	0	0	0	0	0
Unigene0049923	2.76171	5.82427	1.07652	7.05262e-05	0.000742901	Sulfite exporter TauE/SafE family protein isoform 2 [Theobroma cacao]	0	GO:0031224//intrinsic to membrane	0	0
Unigene0053033	2.56153	5.40211	1.07652	7.05262e-05	0.000743012	0	0	0	0	0
Unigene0004768	25.9124	54.7001	1.0779	0	0	hypothetical protein MTR_2g007950 [Medicago truncatula]	0	0	0	0
Unigene0030982	10.0309	21.1841	1.07853	4.43646e-13	1.79015e-11	PREDICTED: nucleolar protein 60like [Cicer arietinum]	ko03008//Ribosome biogenesis in eukaryotes	GO:0044424//intracellular part	0	0
Unigene0025616	8.78377	18.5574	1.07909	2.53352e-13	1.08545e-11	0	0	0	0	0
Unigene0034672	13.0948	27.6804	1.07987	1.84142e-12	6.30138e-11	0	0	0	0	0
Unigene0083908	10.3148	21.8339	1.08185	2.07612e-13	9.10076e-12	PREDICTED: DNA0directed RNA polymerases I, II, and III subunit RPABC10like [Cicer arietinum]	ko00230//Purine metabolism;ko05016//Huntington's disease;ko00240//Pyrimidine metabolism;ko03020//RNA polymerase;ko04623//Cytosolic DNA0sensing pathway	0	0	0
Unigene0045898	15.1762	32.1466	1.08286	4.90718e-14	2.37884e-12	0	0	0	0	0
Unigene0037263	77.5567	164.293	1.08295	2.13606e-13	9.3343e-12	0	0	0	0	0
Unigene0037485	5.81129	12.314	1.08337	2.69584e-12	8.92443e-11	0	0	0	0	0
Unigene0028328	1.68188	3.56636	1.08438	3.90206e-06	5.39442e-05	0	0	0	0	0
Unigene0039119	14.5315	30.8252	1.08493	4.51638e-13	1.81612e-11	0	0	0	0	0
Unigene0083375	1.82507	3.87228	1.08523	1.14495e-05	0.000144875	0	0	0	0	0
Unigene0086647	1.29981	2.75784	1.08523	1.14495e-05	0.000144901	Os02g0809500 [Oryza sativa Japonica Group]	0	0	0	0
Unigene0024113	1.14019	2.41972	1.08556	1.64084e-05	0.000201083	0	0	0	0	0
Unigene0010249	1.02063	2.16651	1.08591	2.35286e-05	0.000276443	PREDICTED: uncharacterized protein LOC101496141 [Cicer arietinum]	0	0	0	0
Unigene0082937	1.79263	3.80627	1.0863	3.37594e-05	0.000382966	PREDICTED: GDSL esterase/lipase At4g287800like isoform X2 [Cicer arietinum]	0	0	0	0
Unigene0032795	1.67749	3.56282	1.08671	4.84708e-05	0.000531351	0	0	0	0	0
Unigene0034682	268.693	570.898	1.08727	7.10764e-12	2.11775e-10	0	0	0	0	0
Unigene0047422	7.36293	15.6573	1.08849	4.84058e-14	2.34818e-12	PREDICTED: ubiquitin0like0specific protease ESD40like [Cicer arietinum]	0	0	0	0
Unigene0048506	8.01146	17.0439	1.08912	2.2218e-07	3.78397e-06	PREDICTED: diacylglycerol O0acyltransferase 10like isoform X7 [Cicer arietinum]	ko00561//Glycerolipid metabolism;ko00830//Retinol metabolism;ko04975//Fat digestion and absorption	GO:0031224//intrinsic to membrane;GO:0009526//plastid envelope;GO:0031090//organelle membrane	GO:0016411//acylglycerol O0acyltransferase activity	GO:0009725//response to hormone stimulus;GO:0009845//seed germination;GO:0009746;GO:0006641//triglyceride metabolic process;GO:0048511//rhythmic process;GO:0006970//response to osmotic stress;GO:0003006//developmental process involved in reproduction;GO:0009790//embryo development
Unigene0082517	5.9964	12.757	1.08912	2.42916e-13	1.04778e-11	0	0	0	0	0
Unigene0046985	12.0657	25.6751	1.08945	3.80084e-10	9.16191e-09	0	0	0	0	0
Unigene0082881	7.48488	15.9323	1.08991	0	0	PREDICTED: ultraviolet0B receptor UVR80like [Cicer arietinum]	0	0	0	0
Unigene0003346	6.13008	13.0493	1.09	1.39067e-12	4.88295e-11	0	0	0	0	0
Unigene0024510	9.34671	19.9092	1.09091	9.992e-15	5.06828e-13	0	0	0	0	0
Unigene0015265	4.42225	9.42044	1.09102	7.8304e-12	2.3144e-10	Galactose mutarotase0like superfamily protein [Theobroma cacao]	ko00010//Glycolysis / Gluconeogenesis	GO:0043231//intracellular membrane0bounded organelle	GO:0005488//binding;GO:0016857//racemase and epimerase activity, acting on carbohydrates and derivatives	GO:0019318//hexose metabolic process
Unigene0035268	47.2569	100.679	1.09116	0	0	0	0	0	0	0
Unigene0047388	13.59	28.9571	1.09137	0	0	MOSC domain0containing protein [Medicago truncatula]	0	0	0	0
Unigene0041561	73.6104	156.913	1.09199	7.83596e-13	2.93844e-11	Serine/threonine protein kinase ICK [Medicago truncatula]	0	0	0	0
Unigene0021950	6.98466	14.8995	1.093	5.32462e-13	2.09896e-11	Parallel spindle [Medicago truncatula]	0	0	0	GO:0031047//gene silencing by RNA;GO:0009908//flower development;GO:0051716//cellular response to stimulus;GO:0016070//RNA metabolic process;GO:0007154//cell communication;GO:0044700;GO:0043414//macromolecule methylation;GO:0050794//regulation of cellular process;GO:0048229//gametophyte development;GO:0040029//regulation of gene expression, epigenetic
Unigene0029758	8.24146	17.5805	1.093	5.50796e-06	7.41833e-05	0	0	0	0	0
Unigene0035836	6.48342	13.8303	1.093	1.30759e-10	3.34655e-09	reverse transcriptase family member [Glycine max]	0	GO:0044446//intracellular organelle part;GO:0005777//peroxisome;GO:0015629//actin cytoskeleton;GO:0016020//membrane	GO:0016874//ligase activity;GO:0032550;GO:0016887//ATPase activity;GO:0003723//RNA binding;GO:0034061;GO:0016788//hydrolase activity, acting on ester bonds	GO:0010468//regulation of gene expression;GO:0019752//carboxylic acid metabolic process;GO:2000112;GO:0006625//protein targeting to peroxisome;GO:0009154;GO:0016070//RNA metabolic process;GO:0080090//regulation of primary metabolic process;GO:0006260//DNA replication;GO:0050896//response to stimulus;GO:0006412//translation
Unigene0020968	2.7833	5.93968	1.09359	7.8848e-06	0.000103141	0	0	0	0	0
Unigene0081746	5.2079	11.1187	1.09422	1.1293e-05	0.000142997	0	0	0	0	0
Unigene0045767	6.43343	13.7379	1.0945	2.69118e-13	1.14459e-11	Kinesin [Medicago truncatula]	0	GO:0005875//microtubule associated complex	GO:0015631//tubulin binding;GO:0003774//motor activity;GO:0032550	GO:0007017//microtubule0based process
Unigene0039071	39.3404	84.01	1.09455	2.79088e-12	9.20859e-11	cyclin D [Pisum sativum]	ko04075//Plant hormone signal transduction	GO:0043231//intracellular membrane0bounded organelle	0	0
Unigene0025259	42.0093	89.7171	1.09468	0	0	PREDICTED: calcium0dependent protein kinase 200like [Cicer arietinum]	ko04626//Plant0pathogen interaction;ko05145//Toxoplasmosis	0	GO:0032550;GO:0004674//protein serine/threonine kinase activity;GO:0046872//metal ion binding	GO:0006464//protein modification process;GO:0006796//phosphate0containing compound metabolic process;GO:0009664//plant0type cell wall organization;GO:0000904//cell morphogenesis involved in differentiation
Unigene0035747	6.62095	14.1422	1.09489	1.6183e-05	0.000198634	PREDICTED: protein RFT1 homolog isoform X1 [Cicer arietinum]	ko00510//N0Glycan biosynthesis	GO:0031224//intrinsic to membrane	GO:0022892	GO:0048285;GO:0010876
Unigene0083990	2.09516	4.47521	1.09489	1.6183e-05	0.000198703	0	0	0	0	0
Unigene0081917	1.06606	2.27708	1.09489	1.6183e-05	0.000198668	PREDICTED: uncharacterized LOC101218779 [Cucumis sativus]	0	0	0	0
Unigene0018435	0.788403	1.68428	1.09513	1.53595e-07	2.67308e-06	Ankyrin repeat domain0containing protein [Medicago truncatula]	0	GO:0043231//intracellular membrane0bounded organelle	0	GO:0009267//cellular response to starvation;GO:0006351//transcription, DNA0dependent;GO:0009247//glycolipid biosynthetic process
Unigene0017000	118.192	252.535	1.09535	3.4328e-13	1.4254e-11	trypsin inhibitor [Pisum sativum]	0	0	0	0
Unigene0085587	2.63942	5.64211	1.09601	3.0972e-09	6.7294e-08	gag/pol polyprotein [Pisum sativum]	0	0	0	0
Unigene0051719	2.31365	4.94807	1.09669	4.45942e-07	7.25111e-06	0	0	0	0	0
Unigene0047578	8.65182	18.5106	1.09727	4.77934e-05	0.000524417	0	0	0	0	0
Unigene0034062	3.14051	6.72126	1.09773	1.27012e-08	2.54785e-07	Acetolactate synthase [Medicago truncatula]	ko00770//Pantothenate and CoA biosynthesis;ko00650//Butanoate metabolism;ko00290//Valine, leucine and isoleucine biosynthesis;ko00660//C50Branched dibasic acid metabolism	0	GO:0046872//metal ion binding;GO:0019842//vitamin binding;GO:0016744;GO:0000166//nucleotide binding	GO:0008652//cellular amino acid biosynthetic process;GO:0006549//isoleucine metabolic process;GO:0006573//valine metabolic process
Unigene0042393	29.5332	63.2072	1.09775	8.30446e-13	3.08604e-11	PREDICTED: glucose060phosphate/phosphate translocator 2, chloroplastic0like [Cicer arietinum]	0	0	0	0
Unigene0050573	1.95341	4.18204	1.09821	6.86634e-05	0.000724804	Cysteine desulfuration protein sufE [Medicago truncatula]	ko00760//Nicotinate and nicotinamide metabolism	GO:0009536//plastid	GO:0030234//enzyme regulator activity	GO:0009058//biosynthetic process;GO:0006790//sulfur compound metabolic process;GO:0044093
Unigene0034560	13.0586	27.9583	1.09828	0	0	gag/pol polyprotein [Pisum sativum]	0	0	GO:0004175//endopeptidase activity;GO:0003676//nucleic acid binding;GO:0016891//endoribonuclease activity, producing 5'0phosphomonoesters;GO:0034061	GO:0006260//DNA replication;GO:0019538//protein metabolic process
Unigene0014819	4.26219	9.13136	1.09924	1.85535e-06	2.71781e-05	Polyamine0modulated factor 10binding protein 1 [Theobroma cacao]	0	GO:0009536//plastid	0	0
Unigene0043773	40.4135	86.6048	1.09961	2.77112e-13	1.17503e-11	0	0	0	0	0
Unigene0013384	4.48836	9.62187	1.10013	1.50825e-09	3.39716e-08	PREDICTED: uncharacterized serine0rich protein C215.130like isoform X2 [Setaria italica]	0	0	0	0
Unigene0081725	4.02764	8.63801	1.10076	3.79296e-06	5.25917e-05	0	0	0	0	0
Unigene0018960	5.17655	11.1036	1.10097	1.06126e-07	1.89788e-06	0	0	0	0	0
Unigene0004123	1.95957	4.20512	1.10161	1.51302e-07	2.63711e-06	PREDICTED: superoxide dismutase [Fe] 3, chloroplastic0like isoform X3 [Cicer arietinum]	0	GO:0009295//nucleoid;GO:0009570//chloroplast stroma	GO:0016209//antioxidant activity;GO:0043169//cation binding;GO:0003824//catalytic activity	GO:0006801//superoxide metabolic process;GO:0044710
Unigene0035566	10.8787	23.3674	1.10299	3.63598e-10	8.78265e-09	0	0	0	0	0
Unigene0027021	16.6647	35.8009	1.1032	1.52058e-11	4.31062e-10	0	0	0	0	0
Unigene0083349	7.52648	16.1701	1.10328	1.25078e-08	2.51336e-07	0	0	0	0	0
Unigene0010541	2.22856	4.78856	1.10348	1.11238e-05	0.000140983	PREDICTED: splicing factor U2af large subunit B0like isoform X3 [Cicer arietinum]	ko03040//Spliceosome	GO:0043231//intracellular membrane0bounded organelle	GO:0003676//nucleic acid binding;GO:0036094	GO:0006396//RNA processing
Unigene0028066	40.5522	87.1713	1.10407	1.63691e-12	5.67925e-11	Arf0GAP with coiled0coil, ANK repeat and PH domain0containing protein [Medicago truncatula]	ko04144//Endocytosis	GO:0043231//intracellular membrane0bounded organelle;GO:0044444//cytoplasmic part	GO:0046914//transition metal ion binding;GO:0005083//small GTPase regulator activity;GO:0003676//nucleic acid binding	GO:0003006//developmental process involved in reproduction;GO:0032850;GO:0006498//N0terminal protein lipidation
Unigene0047001	18.4182	39.5996	1.10435	0	0	Paladin [Medicago truncatula]	0	0	0	0
Unigene0042749	42.3252	91.0304	1.10483	4.52526e-12	1.41135e-10	RNA polymerase II elongation factor ELL3 isoform 1 [Theobroma cacao]	0	0	0	0
Unigene0046947	12.3222	26.5023	1.10486	5.57332e-14	2.6832e-12	Peroxisomal membrane protein [Medicago truncatula]	ko04146//Peroxisome	GO:0043231//intracellular membrane0bounded organelle;GO:0044446//intracellular organelle part;GO:0044444//cytoplasmic part;GO:0031090//organelle membrane	0	0
Unigene0011132	4.38082	9.42741	1.10566	2.28502e-05	0.000269286	0	0	0	0	0
Unigene0014244	1.41922	3.05412	1.10566	2.28502e-05	0.000269331	0	0	0	0	0
Unigene0047620	1.40752	3.02896	1.10566	2.28502e-05	0.000269376	PREDICTED: adipocyte plasma membrane0associated protein0like isoform X1 [Cicer arietinum]	0	0	0	0
Unigene0023758	11.6733	25.1462	1.10712	2.51354e-13	1.07953e-11	0	0	0	0	0
Unigene0024904	3.0985	6.67506	1.10721	1.82637e-06	2.67647e-05	0	0	0	0	0
Unigene0013583	1.90101	4.09589	1.10741	1.04452e-07	1.86939e-06	PREDICTED: protein FAM91A10like [Cicer arietinum]	0	0	0	0
Unigene0019209	4.01872	8.65867	1.10741	1.50546e-13	6.76434e-12	PREDICTED: uncharacterized protein LOC101493401 isoform X1 [Cicer arietinum]	0	0	0	0
Unigene0045250	7.31097	15.761	1.10822	2.61046e-06	3.72576e-05	0	0	0	0	0
Unigene0084731	4.14586	8.93764	1.10822	1.489e-07	2.59977e-06	0	0	0	0	0
Unigene0046522	14.1186	30.4717	1.10987	8.65324e-11	2.25586e-09	0	0	0	0	0
Unigene0037609	29.522	63.7293	1.11017	6.10622e-14	2.9317e-12	0	0	0	0	0
Unigene0009635	10.3354	22.3156	1.11046	9.21486e-14	4.29755e-12	PREDICTED: SPX domain0containing protein 20like [Cicer arietinum]	0	GO:0043231//intracellular membrane0bounded organelle	0	GO:0009267//cellular response to starvation;GO:0015698//inorganic anion transport;GO:0006351//transcription, DNA0dependent;GO:0009247//glycolipid biosynthetic process
Unigene0004622	1.13118	2.44239	1.11046	5.33966e-06	7.20689e-05	D0xylose0proton symporter0like protein [Medicago truncatula]	0	0	0	0
Unigene0026351	4.74166	10.238	1.11046	2.49422e-08	4.83714e-07	PREDICTED: uncharacterized LOC101208769 [Cucumis sativus]	0	0	0	0
Unigene0034661	10.654	23.0134	1.11107	1.74334e-10	4.38332e-09	0	0	0	0	0
Unigene0032341	3.04879	6.58583	1.11113	0	0	0	0	0	0	0
Unigene0038128	2.83744	6.13357	1.11214	5.0591e-08	9.43768e-07	This gene may be cut off [Arabidopsis thaliana]	0	GO:0043231//intracellular membrane0bounded organelle	0	0
Unigene0002808	3.98488	8.61396	1.11214	5.0591e-08	9.44019e-07	0	0	0	0	0
Unigene0047378	7.54086	16.311	1.11304	5.97586e-09	1.25293e-07	PREDICTED: protein FAR10RELATED SEQUENCE 110like isoform X1 [Cicer arietinum]	0	0	0	0
Unigene0021660	2.30722	4.99055	1.11304	8.80214e-07	1.36866e-05	PREDICTED: uncharacterized membrane protein YuiD0like [Cicer arietinum]	0	0	0	0
Unigene0046698	9.0656	19.609	1.11304	8.80214e-07	1.36896e-05	0	0	0	0	0
Unigene0017281	178.375	386.146	1.11423	6.36824e-13	2.45508e-11	Histone H2A [Medicago truncatula]	ko05322//Systemic lupus erythematosus	0	0	0
Unigene0027748	5.27888	11.4297	1.11448	0	0	0	0	0	0	0
Unigene0015081	1.95225	4.22759	1.1147	1.20992e-08	2.43686e-07	PREDICTED: serine/threonine0protein kinase SRK2E0like [Cicer arietinum]	ko04075//Plant hormone signal transduction	0	0	0
Unigene0037947	25.4248	55.0636	1.11486	0	0	0	0	0	0	0
Unigene0044599	14.173	30.6978	1.11499	1.20636e-10	3.09766e-09	Callose synthase [Medicago truncatula]	0	0	0	0
Unigene0049547	3.00218	6.5044	1.1154	1.79568e-06	2.63425e-05	Histone0lysine N0methyltransferase SUVR4 [Medicago truncatula]	0	GO:0031981//nuclear lumen;GO:0043232;GO:0005911//cell0cell junction	GO:0046914//transition metal ion binding;GO:0016279//protein0lysine N0methyltransferase activity	GO:0016571//histone methylation
Unigene0050546	3.12311	6.76771	1.11569	1.71333e-10	4.31097e-09	metal transporter [Nicotiana tabacum]	0	0	0	0
Unigene0053471	1.83298	3.97301	1.11604	2.2468e-05	0.000265407	0	0	0	0	0
Unigene0017280	49.142	106.628	1.11756	9.90318e-14	4.58801e-12	0	0	0	0	0
Unigene0012214	3.15445	6.84535	1.11774	3.22232e-05	0.000366786	PREDICTED: glycerol030phosphate dehydrogenase SDP6, mitochondrial0like [Cicer arietinum]	ko00564//Glycerophospholipid metabolism	GO:0043231//intracellular membrane0bounded organelle;GO:0019866//organelle inner membrane;GO:0044444//cytoplasmic part	GO:0016901//oxidoreductase activity, acting on the CH0OH group of donors, quinone or similar compound as acceptor;GO:0016899//oxidoreductase activity, acting on the CH0OH group of donors, oxygen as acceptor	GO:0006071//glycerol metabolic process;GO:0052646;GO:0022904//respiratory electron transport chain;GO:0019758;GO:0006006//glucose metabolic process;GO:0006812//cation transport
Unigene0035608	7.92663	17.2037	1.11794	4.9133e-10	1.16708e-08	0	0	0	0	0
Unigene0041385	43.0129	93.3668	1.11814	0	0	0	0	0	0	0
Unigene0024776	9.94292	21.5857	1.11834	4.2457e-07	6.92288e-06	0	0	0	0	0
Unigene0045512	11.332	24.6624	1.12191	1.43777e-07	2.51723e-06	0	0	0	0	0
Unigene0082224	1.17489	2.5577	1.12232	1.23458e-06	1.87514e-05	Protein CHUP1 [Medicago truncatula]	0	GO:0009536//plastid	0	0
Unigene0032869	25.4683	55.4561	1.12264	0	0	0	0	0	0	0
Unigene0086908	12.4302	27.0685	1.12277	1.18261e-12	4.23088e-11	PREDICTED: oxygen0evolving enhancer protein 201, chloroplastic0like [Cicer arietinum]	ko00195//Photosynthesis	0	0	0
Unigene0002102	3.80109	8.28347	1.12382	9.54332e-05	0.000972364	0	0	0	0	0
Unigene0013974	5.67191	12.3604	1.12382	1.3842e-11	3.94476e-10	0	0	0	0	0
Unigene0041983	37.8748	82.5487	1.12401	2.23598e-13	9.7345e-12	histone H1 subtype 6 [Lathyrus gmelinii]	0	0	0	0
Unigene0028122	5.11888	11.1604	1.1245	4.35208e-13	1.76321e-11	0	0	0	0	0
Unigene0034476	4.57953	9.98645	1.12477	1.53925e-05	0.000189763	0	0	0	0	0
Unigene0082737	1.8935	4.12909	1.12477	1.53925e-05	0.000189729	0	0	0	0	0
Unigene0035850	1.58309	3.45219	1.12477	1.53925e-05	0.000189696	0	0	0	0	0
Unigene0040736	8.33865	18.1869	1.12501	4.8799e-08	9.13013e-07	PREDICTED: mediator of RNA polymerase II transcription subunit 120like [Cicer arietinum]	ko03440//Homologous recombination;ko03420//Nucleotide excision repair;ko03030//DNA replication;ko03430//Mismatch repair	0	0	0
Unigene0044405	18.0488	39.3963	1.12616	2.68674e-13	1.14409e-11	Gibberellin induced protein [Medicago truncatula]	0	0	0	0
Unigene0015267	1.36653	2.98412	1.12679	2.2057e-05	0.00026201	Galactose mutarotase0like superfamily protein [Theobroma cacao]	ko00010//Glycolysis / Gluconeogenesis	GO:0043231//intracellular membrane0bounded organelle	GO:0005488//binding;GO:0016857//racemase and epimerase activity, acting on carbohydrates and derivatives	GO:0019318//hexose metabolic process
Unigene0036341	1.90998	4.17189	1.12714	3.6009e-06	5.01072e-05	Malate dehydrogenase [Medicago truncatula]	ko00620//Pyruvate metabolism;ko00710//Carbon fixation in photosynthetic organisms;ko00020//Citrate cycle (TCA cycle);ko00630//Glyoxylate and dicarboxylate metabolism;ko04964//Proximal tubule bicarbonate reclamation	0	0	0
Unigene0037950	6.01404	13.153	1.12898	5.14878e-06	6.96268e-05	0	0	0	0	0
Unigene0051598	2.69453	5.89307	1.12898	3.16244e-05	0.000360556	0	0	0	0	0
Unigene0004567	3.15718	6.91193	1.13045	2.01032e-07	3.44558e-06	PREDICTED: ATPase family AAA domain0containing protein 10A0like isoform X2 [Cicer arietinum]	0	0	0	0
Unigene0002897	3.67716	8.05316	1.13096	7.3651e-06	9.69224e-05	Apospory0associated protein C [Medicago truncatula]	ko00010//Glycolysis / Gluconeogenesis	GO:0043231//intracellular membrane0bounded organelle	GO:0005488//binding;GO:0016857//racemase and epimerase activity, acting on carbohydrates and derivatives	GO:0019318//hexose metabolic process
Unigene0084319	2.58583	5.6672	1.13201	2.86572e-07	4.79324e-06	0	0	0	0	0
Unigene0086931	4.18034	9.16181	1.13201	3.26538e-10	7.92024e-09	0	0	0	0	0
Unigene0025869	9.0656	19.8749	1.13247	1.72926e-06	2.54535e-05	0	0	0	0	0
Unigene0031698	3.034	6.65446	1.1331	1.05401e-05	0.000134339	hypothetical protein MTR_7g024810 [Medicago truncatula]	0	0	0	0
Unigene0050747	2.16466	4.74774	1.1331	1.05401e-05	0.000134363	0	0	0	0	0
Unigene0026067	15.3556	33.6823	1.13323	5.39568e-14	2.60304e-12	0	0	0	0	0
Unigene0046696	12.7318	27.9284	1.13329	4.66294e-15	2.40881e-13	PREDICTED: PH0interacting protein0like [Cicer arietinum]	0	GO:0031461//cullin0RING ubiquitin ligase complex;GO:0043231//intracellular membrane0bounded organelle	GO:0036094	GO:0009606//tropism
Unigene0085566	1.47496	3.23704	1.134	6.51294e-05	0.000691355	Receptor kinase0like protein [Medicago truncatula]	0	0	0	0
Unigene0045054	13.3583	29.3324	1.13476	3.8972e-09	8.34592e-08	0	0	0	0	0
Unigene0043076	1.35814	2.98358	1.13541	5.82774e-07	9.30327e-06	Polygalacturonase QRT3 [Medicago truncatula]	0	0	0	0
Unigene0033515	1.55753	3.4251	1.13689	9.356e-05	0.000955223	PREDICTED: secologanin synthase0like [Cicer arietinum]	0	0	0	0
Unigene0034681	92.3104	203.05	1.13727	3.4328e-13	1.42455e-11	0	0	0	0	0
Unigene0037006	1.01824	2.23976	1.13727	8.314e-07	1.29939e-05	PREDICTED: probable serine/threonine0protein kinase DDB_G02829630like [Cicer arietinum]	0	0	0	GO:0044699
Unigene0051276	2.14806	4.72587	1.13755	7.7131e-11	2.02358e-09	0	0	0	0	0
Unigene0030092	1.62898	3.58477	1.13792	2.16172e-05	0.000257178	PREDICTED: transcription factor bHLH180like [Cicer arietinum]	0	0	0	0
Unigene0084894	1.65746	3.64746	1.13792	2.16172e-05	0.000257222	Os01g0299500 [Oryza sativa Japonica Group]	0	0	0	0
Unigene0002795	4.59312	10.1106	1.13832	4.54572e-10	1.08234e-08	0	0	0	0	0
Unigene0048712	9.92476	21.8679	1.13971	2.80708e-07	4.70189e-06	0	0	0	0	0
Unigene0004786	2.82312	6.22369	1.14048	2.1807e-12	7.34403e-11	Os01g0850000 [Oryza sativa Japonica Group]	0	0	0	0
Unigene0039492	3.46668	7.64484	1.14093	0	0	ABC transporter family protein [Medicago truncatula]	0	GO:0044444//cytoplasmic part	GO:0032550;GO:0017111//nucleoside0triphosphatase activity	GO:0051603//proteolysis involved in cellular protein catabolic process;GO:0006007//glucose catabolic process;GO:0006886//intracellular protein transport;GO:0006996//organelle organization;GO:0006970//response to osmotic stress;GO:0010038//response to metal ion;GO:0009154;GO:0006952//defense response;GO:0006405//RNA export from nucleus
Unigene0047570	9.03445	19.9291	1.14137	1.6936e-06	2.49862e-05	0	0	0	0	0
Unigene0083443	3.16369	6.97878	1.14137	1.6936e-06	2.4981e-05	0	0	0	0	0
Unigene0087057	2.751	6.06946	1.14161	4.0014e-07	6.55352e-06	Heat stress transcription factor B04 [Medicago truncatula]	0	GO:0043231//intracellular membrane0bounded organelle	GO:0001071//nucleic acid binding transcription factor activity;GO:0003677//DNA binding	GO:0006351//transcription, DNA0dependent;GO:0006950//response to stress
Unigene0037100	19.2068	42.3962	1.14232	3.13398e-10	7.62794e-09	0	0	0	0	0
Unigene0043693	27.7345	61.2425	1.14285	1.91513e-12	6.52179e-11	PREDICTED: protein FIZZY0RELATED 30like [Cicer arietinum]	0	GO:0043231//intracellular membrane0bounded organelle;GO:0031234//extrinsic to internal side of plasma membrane	GO:0060089	GO:0007017//microtubule0based process;GO:0016458//gene silencing;GO:0044786;GO:0001558//regulation of cell growth;GO:0035966;GO:0008283//cell proliferation;GO:0006305;GO:0019953//sexual reproduction;GO:0006511//ubiquitin0dependent protein catabolic process;GO:0010564//regulation of cell cycle process;GO:0007154//cell communication;GO:0043623//cellular protein complex assembly;GO:0034968//histone …
Unigene0031980	12.7848	28.2463	1.14363	1.01918e-13	4.70929e-12	0	0	0	0	0
Unigene0050003	2.04896	4.5269	1.14363	1.03204e-05	0.000131777	PREDICTED: sugar transport protein 70like [Cicer arietinum]	0	GO:0031224//intrinsic to membrane	GO:0022857//transmembrane transporter activity	GO:0051234//establishment of localization;GO:0044763
Unigene0081704	2.69752	5.95981	1.14363	2.58426e-11	7.12416e-10	PREDICTED: GDSL esterase/lipase At5g228100like [Cicer arietinum]	0	0	0	0
Unigene0082264	4.2026	9.28506	1.14363	2.58426e-11	7.12696e-10	0	0	0	0	0
Unigene0018719	2.16816	4.79478	1.145	6.31572e-10	1.4841e-08	0	0	0	0	0
Unigene0035901	168.544	372.801	1.14529	1.39666e-13	6.31599e-12	0	0	0	0	0
Unigene0043029	12.9326	28.619	1.14596	1.08935e-12	3.93949e-11	Zinc finger0homeodomain protein [Medicago truncatula]	0	0	0	0
Unigene0020544	1.28773	2.85152	1.14691	6.37506e-05	0.000678363	pentatricopeptide repeat0containing protein [Arabidopsis lyrata subsp. lyrata]	0	0	0	0
Unigene0032808	2.13948	4.74146	1.14807	1.16075e-06	1.7699e-05	Os12g0594200 [Oryza sativa Japonica Group]	0	GO:0043231//intracellular membrane0bounded organelle	GO:0004672//protein kinase activity	0
Unigene0048230	5.01755	11.1197	1.14807	1.16075e-06	1.77028e-05	0	0	0	0	0
Unigene0025899	9.16892	20.3353	1.14916	9.29448e-08	1.67456e-06	0	0	0	0	0
Unigene0034683	59.6111	132.271	1.14985	0	0	0	0	0	0	0
Unigene0002109	4.84154	10.7531	1.15121	1.32323e-07	2.32776e-06	PREDICTED: uncharacterized protein LOC101503173 [Cicer arietinum]	0	0	0	0
Unigene0047799	5.96877	13.2567	1.15121	1.12133e-13	5.13384e-12	expressed protein [Oryza sativa Japonica Group]	0	0	0	0
Unigene0005505	2.08118	4.62315	1.15148	7.05504e-06	9.31747e-05	0	0	0	0	0
Unigene0016547	3.98947	8.86761	1.15235	7.21086e-11	1.89607e-09	Serine/threonine protein kinase HT1 [Medicago truncatula]	0	0	0	0
Unigene0018141	1.82908	4.06783	1.15314	2.36418e-06	3.39989e-05	B3 domain0containing protein REM16 [Medicago truncatula]	0	0	0	GO:0006351//transcription, DNA0dependent
Unigene0002508	4.8136	10.7155	1.15452	1.00882e-05	0.000129025	0	0	0	0	0
Unigene0017101	1.70942	3.80533	1.15452	7.95242e-07	1.24566e-05	0	0	0	0	0
Unigene0085476	2.3547	5.2418	1.15452	7.95242e-07	1.24538e-05	0	0	0	0	0
Unigene0010742	10.2545	22.845	1.15562	1.89848e-13	8.39033e-12	PREDICTED: protein LONGIFOLIA 10like [Cicer arietinum]	0	0	0	0
Unigene0044467	13.3613	29.7742	1.156	2.15606e-13	9.41583e-12	PREDICTED: ABC transporter G family member 150like [Cicer arietinum]	0	0	0	0
Unigene0045905	11.0956	24.7294	1.15624	0	0	PREDICTED: ARM REPEAT PROTEIN INTERACTING WITH ABF20like [Cicer arietinum]	0	0	0	0
Unigene0046739	9.13243	20.3558	1.15637	7.3663e-09	1.53071e-07	PREDICTED: growth0regulating factor 10like [Cicer arietinum]	0	GO:0043231//intracellular membrane0bounded organelle	GO:0032550;GO:0016817//hydrolase activity, acting on acid anhydrides	GO:0006351//transcription, DNA0dependent
Unigene0027934	6.50197	14.4958	1.15669	9.08008e-08	1.63804e-06	PREDICTED: uncharacterized membrane protein YuiD0like [Cicer arietinum]	0	GO:0016020//membrane	0	0
Unigene0050777	5.10738	11.3926	1.15744	7.04494e-11	1.85384e-09	0	0	0	0	0
Unigene0027006	2.37752	5.30472	1.15782	1.44311e-05	0.000178886	0	0	0	0	0
Unigene0048172	6.73506	15.0305	1.15813	3.8226e-07	6.27535e-06	0	0	0	0	0
Unigene0041685	61.0478	136.256	1.15831	0	0	0	0	0	0	0
Unigene0034229	132.943	296.86	1.15898	1.26277e-12	4.48104e-11	Pyridoxal phosphate phosphatase PHOSPHO2 [Medicago truncatula]	0	GO:0031224//intrinsic to membrane	GO:0017111//nucleoside0triphosphatase activity;GO:0032550;GO:0015405;GO:0042578//phosphoric ester hydrolase activity	GO:0009154;GO:0044763;GO:0051234//establishment of localization
Unigene0008878	2.20332	4.92147	1.15941	1.10068e-12	3.96816e-11	PREDICTED: ABC transporter G family member 150like isoform X1 [Cicer arietinum]	0	0	0	0
Unigene0007656	4.50197	10.058	1.15971	4.37946e-08	8.24891e-07	PREDICTED: ABC transporter G family member 150like [Cicer arietinum]	0	GO:0005911//cell0cell junction;GO:0016020//membrane	GO:0032550;GO:0017111//nucleoside0triphosphatase activity;GO:0015405	GO:0003002//regionalization;GO:0006970//response to osmotic stress;GO:0006631//fatty acid metabolic process;GO:0044765;GO:0009154
Unigene0019783	2.44847	5.4726	1.16035	6.22712e-05	0.000663629	0	0	0	0	0
Unigene0049680	5.00791	11.1932	1.16035	6.22712e-05	0.00066373	0	0	0	0	0
Unigene0049500	5.00002	11.1786	1.16073	5.44634e-07	8.73822e-06	PREDICTED: cyclin0A2020like [Cicer arietinum]	ko04110//Cell cycle;ko04914//Progesterone0mediated oocyte maturation	GO:0043231//intracellular membrane0bounded organelle	GO:0019900//kinase binding	GO:0051726//regulation of cell cycle
Unigene0020969	2.9591	6.61877	1.1614	2.06522e-05	0.000246745	0	0	0	0	0
Unigene0010329	5.40155	12.0877	1.16209	1.83631e-12	6.28698e-11	0	0	0	0	0
Unigene0038272	8.67607	19.4175	1.16225	6.88782e-06	9.11381e-05	0	0	0	0	0
Unigene0004020	31.4372	70.4106	1.16332	5.8975e-13	2.2938e-11	0	0	0	0	0
Unigene0037970	7.75175	17.3639	1.1635	7.76136e-07	1.21709e-05	0	0	0	0	0
Unigene0047894	6.9093	15.4786	1.16367	8.35446e-10	1.93398e-08	0	0	0	0	0
Unigene0007645	15.1706	33.9976	1.16415	0	0	G protein alpha II subunit [Pisum sativum]	0	0	0	0
Unigene0026066	5.8501	13.114	1.16457	0	0	RING finger0like protein [Medicago truncatula]	0	0	0	0
Unigene0040870	2.68342	6.01604	1.16474	8.93516e-05	0.000916934	0	0	0	0	0
Unigene0048495	4.17198	9.3533	1.16474	8.93516e-05	0.0009168	0	0	0	0	0
Unigene0039477	71.3737	160.031	1.16489	9.25482e-13	3.39953e-11	0	0	0	0	0
Unigene0083879	1.84452	4.13827	1.16578	9.84388e-06	0.000126176	0	0	0	0	0
Unigene0007986	6.72838	15.1025	1.16646	1.10627e-06	1.69347e-05	PREDICTED: S0adenosylmethionine decarboxylase proenzyme0like isoform X1 [Cicer arietinum]	ko00330//Arginine and proline metabolism;ko00270//Cysteine and methionine metabolism	0	GO:0016831//carboxy0lyase activity	GO:0006596//polyamine biosynthetic process;GO:0044272
Unigene0023043	2.30481	5.17575	1.16712	4.27132e-08	8.07344e-07	0	0	0	0	0
Unigene0049975	5.5489	12.4622	1.16728	1.4506e-08	2.89414e-07	0	0	0	0	0
Unigene0006072	3.00229	6.74457	1.16766	5.74268e-10	1.35581e-08	integrase [Populus trichocarpa]	0	GO:0043231//intracellular membrane0bounded organelle	GO:0005488//binding	0
Unigene0003543	2.96791	6.6764	1.16963	1.57718e-06	2.34216e-05	0	0	0	0	0
Unigene0051060	2.97038	6.68197	1.16963	4.7012e-06	6.40939e-05	0	0	0	0	0
Unigene0085622	1.19678	2.69219	1.16963	4.2352e-05	0.000470235	PREDICTED: Fanconi anemia group M protein homolog [Cicer arietinum]	0	0	0	0
Unigene0044773	17.0276	38.3484	1.17129	2.13384e-13	9.33625e-12	PREDICTED: FK5060binding protein 40like [Cicer arietinum]	0	0	0	0
Unigene0035606	10.6452	23.979	1.17156	5.18252e-13	2.04639e-11	0	0	0	0	0
Unigene0086044	3.01153	6.787	1.17227	9.30366e-14	4.33319e-12	class IV chitinase [Medicago sativa]	ko00520//Amino sugar and nucleotide sugar metabolism	0	0	0
Unigene0008530	3.64708	8.22051	1.17248	2.55202e-07	4.30348e-06	expressed protein [Arabidopsis lyrata subsp. lyrata]	0	0	0	0
Unigene0039560	3.75745	8.46929	1.17248	2.55202e-07	4.30451e-06	PREDICTED: MATE efflux family protein ALF50like [Cicer arietinum]	0	GO:0016020//membrane	GO:0015291//secondary active transmembrane transporter activity	GO:0015893//drug transport;GO:0044763
Unigene0006255	5.30045	11.9492	1.17273	2.7558e-12	9.11431e-11	0	0	0	0	0
Unigene0046256	5.45968	12.3174	1.17381	2.01278e-05	0.000241385	0	0	0	0	0
Unigene0083619	1.04964	2.36897	1.17436	6.0692e-05	0.000649567	0	0	0	0	0
Unigene0049909	2.20546	4.97758	1.17436	6.0692e-05	0.000649666	PREDICTED: junctophilin030like [Cicer arietinum]	0	GO:0009536//plastid	GO:0016772//transferase activity, transferring phosphorus0containing groups	GO:0006796//phosphate0containing compound metabolic process
Unigene0050570	1.80741	4.07921	1.17436	6.0692e-05	0.000649765	0	0	0	0	0
Unigene0082861	1.7139	3.86815	1.17436	1.4131e-08	2.82335e-07	PREDICTED: enzymatic polyprotein0like, partial [Cicer arietinum]	0	0	0	0
Unigene0039117	10.3517	23.3748	1.17508	2.66454e-15	1.38361e-13	ENTH/VHS/GAT family protein [Theobroma cacao]	0	GO:0044464//cell part	GO:0022892	GO:0048193//Golgi vesicle transport;GO:0015031//protein transport
Unigene0049265	3.58964	8.1146	1.17668	3.20776e-06	4.49581e-05	0	0	0	0	0
Unigene0082889	1.15283	2.60743	1.17744	5.91288e-08	1.09199e-06	Integrase core domain containing protein [Solanum demissum]	0	0	0	0
Unigene0084855	2.42734	5.49007	1.17744	9.5877e-06	0.000123118	PREDICTED: nuA4 complex subunit EAF3 homolog [Cicer arietinum]	0	0	0	0
Unigene0028931	4.06663	9.20379	1.1784	2.8797e-05	0.000331558	0	0	0	0	0
Unigene0002649	2.03976	4.62037	1.17961	8.70168e-05	0.00089652	Fgenesh protein [Medicago truncatula]	0	0	GO:0016853//isomerase activity	GO:0044267//cellular protein metabolic process
Unigene0031308	4.90934	11.1241	1.18009	3.083e-11	8.37383e-10	DNA gyrase B3 [Arabidopsis thaliana]	0	0	0	0
Unigene0041735	36.5142	82.7596	1.18047	5.94858e-13	2.30982e-11	0	0	0	0	0
Unigene0002986	3.26628	7.40384	1.18062	4.57624e-06	6.25485e-05	0	0	0	0	0
Unigene0019681	2.52108	5.71466	1.18062	4.57624e-06	6.25363e-05	0	0	0	0	0
Unigene0010768	0.816959	1.8526	1.18121	2.48356e-07	4.1951e-06	Formin0like protein [Medicago truncatula]	0	GO:0015629//actin cytoskeleton	0	GO:0048447;GO:0048446//petal morphogenesis;GO:0007015//actin filament organization
Unigene0032223	1.92357	4.36203	1.18121	2.48356e-07	4.19611e-06	0	0	0	0	0
Unigene0045439	6.54001	14.8306	1.18121	1.9762e-13	8.69539e-12	Group 2 isoform 1 [Theobroma cacao]	0	0	0	0
Unigene0001731	2.14864	4.87991	1.18343	2.18814e-06	3.16231e-05	Hop0interacting protein THI015 [Solanum lycopersicum]	0	0	GO:0046914//transition metal ion binding	0
Unigene0032838	25.8611	58.7348	1.18343	0	0	0	0	0	0	0
Unigene0036262	5.02116	11.4113	1.18437	1.95178e-08	3.83507e-07	0	0	0	0	0
Unigene0037363	3.79594	8.63328	1.18545	2.98064e-11	8.11784e-10	Tyrosine/dopa decarboxylase [Medicago truncatula]	0	0	0	0
Unigene0033253	2.27675	5.17982	1.18593	1.04793e-06	1.60908e-05	DNA polymerase alpha catalytic subunit [Medicago truncatula]	0	0	0	0
Unigene0003177	4.33325	9.86	1.18614	9.41818e-09	1.92006e-07	0	0	0	0	0
Unigene0005910	4.73205	10.7674	1.18614	9.41818e-09	1.91951e-07	Proteasome inhibitor0related [Theobroma cacao]	0	0	0	0
Unigene0008454	15.3324	34.8916	1.1863	9.38582e-13	3.43325e-11	PREDICTED: patatin group D020like [Cicer arietinum]	0	0	GO:0003824//catalytic activity	GO:0010073//meristem maintenance;GO:0044238//primary metabolic process
Unigene0012138	3.76241	8.56441	1.1867	1.69775e-07	2.94225e-06	NADH0ubiquinone oxidoreductase chain [Medicago truncatula]	0	GO:0043231//intracellular membrane0bounded organelle	0	0
Unigene0034195	0.578304	1.3164	1.1867	1.9576e-05	0.000235251	Endoribonuclease Dicer [Medicago truncatula]	0	GO:0043231//intracellular membrane0bounded organelle	GO:0032550;GO:0016891//endoribonuclease activity, producing 5'0phosphomonoesters;GO:0003676//nucleic acid binding;GO:0042623//ATPase activity, coupled	GO:0006351//transcription, DNA0dependent;GO:0006305;GO:0009791//post0embryonic development;GO:0030422//production of siRNA involved in RNA interference;GO:0007154//cell communication;GO:0009933//meristem structural organization;GO:0002252;GO:0000377;GO:0006464//protein modification process;GO:0035195//gene silencing by miRNA;GO:0009799//specification of symmetry;GO:0045087//innate immune response…
Unigene0005297	6.57922	14.9818	1.18722	1.30118e-13	5.91093e-12	MYB transcription factor MYB127 [Glycine max]	0	0	0	0
Unigene0039158	13.1069	29.8753	1.18863	0	0	Helicase/SANT0associated, DNA binding protein [Arabidopsis thaliana]	0	0	GO:0005488//binding	0
Unigene0033959	3.47233	7.91668	1.18899	5.90138e-05	0.000634222	Beta0galactosidase [Medicago truncatula]	0	GO:0030312//external encapsulating structure	GO:0005488//binding;GO:0015925	GO:0044238//primary metabolic process
Unigene0028935	3.26927	7.45372	1.18899	5.90138e-05	0.000634319	0	0	0	0	0
Unigene0050174	1.99585	4.55209	1.18952	9.31998e-06	0.000119922	0	0	0	0	0
Unigene0082407	3.96841	9.05105	1.18952	3.62904e-10	8.76891e-09	0	0	0	0	0
Unigene0039597	5.57398	12.7163	1.1899	1.49224e-06	2.22926e-05	0	0	0	0	0
Unigene0024114	2.01248	4.59788	1.19199	4.9516e-14	2.3954e-12	0	0	0	0	0
Unigene0083097	5.08905	11.6477	1.19457	1.33049e-05	0.000166072	0	0	0	0	0
Unigene0017535	16.1728	37.0664	1.19655	5.19362e-13	2.04962e-11	gag/pol polyprotein [Pisum sativum]	0	0	GO:0003824//catalytic activity	GO:0043170;GO:0044238//primary metabolic process
Unigene0030361	8.08174	18.526	1.19681	6.3399e-06	8.43502e-05	0	0	0	0	0
Unigene0083881	8.9617	20.5431	1.19681	3.13082e-14	1.5401e-12	0	0	0	0	0
Unigene0017310	8.51948	19.5411	1.19767	1.80522e-13	8.01356e-12	Galactose mutarotase0like superfamily protein [Theobroma cacao]	ko00010//Glycolysis / Gluconeogenesis	0	0	0
Unigene0008507	1.11342	2.55412	1.19782	4.00168e-05	0.000446288	FAR10related protein [Medicago truncatula]	0	0	0	0
Unigene0008551	2.04568	4.69266	1.19782	4.87788e-07	7.8785e-06	ribosomal L18p/L5e family protein [Arabidopsis thaliana]	0	0	0	0
Unigene0029902	3.28089	7.52613	1.19782	4.00168e-05	0.000446359	0	0	0	0	0
Unigene0020484	27.8411	63.891	1.1984	4.32764e-13	1.75635e-11	PREDICTED: disease resistance response protein 2060like [Cicer arietinum]	0	0	0	0
Unigene0049967	3.18091	7.30026	1.19851	3.81678e-08	7.26329e-07	PREDICTED: pentatricopeptide repeat0containing protein At4g210650like [Cicer arietinum]	0	GO:0043231//intracellular membrane0bounded organelle	0	0
Unigene0006436	7.53877	17.3075	1.199	3.02238e-09	6.57703e-08	0	0	0	0	0
Unigene0011935	1.55451	3.57639	1.20205	9.04112e-06	0.00011672	0	0	0	0	0
Unigene0086746	1.23258	2.83771	1.20305	2.0683e-09	4.58343e-08	Pentatricopeptide repeat0containing protein [Medicago truncatula]	0	0	0	0
Unigene0046266	8.35735	19.2516	1.20386	0	0	Homeobox protein knotted010like protein [Medicago truncatula]	0	0	0	0
Unigene0007408	0.758628	1.74804	1.20427	5.72388e-05	0.000616754	TLD0domain containing nucleolar protein isoform 1 [Theobroma cacao]	0	GO:0043231//intracellular membrane0bounded organelle	0	GO:0016192//vesicle0mediated transport;GO:0032989;GO:0040007//growth
Unigene0082390	2.28865	5.27353	1.20427	5.72388e-05	0.000616849	0	0	0	0	0
Unigene0036942	20.3441	46.9188	1.20556	4.2344e-13	1.72451e-11	PREDICTED: helicase domino0like [Cicer arietinum]	0	GO:0043231//intracellular membrane0bounded organelle	GO:0003676//nucleic acid binding;GO:0017111//nucleoside0triphosphatase activity;GO:0032550	0
Unigene0027563	2.17708	5.023	1.20615	2.7132e-05	0.000314612	Adenylyl0sulfate kinase [Medicago truncatula]	ko00230//Purine metabolism;ko00920//Sulfur metabolism	0	GO:0016301//kinase activity;GO:0032550	GO:0044272;GO:0006796//phosphate0containing compound metabolic process;GO:0044710
Unigene0051771	1.58689	3.66129	1.20615	2.7132e-05	0.00031456	GPN0loop GTPase [Medicago truncatula]	0	0	GO:0005488//binding	0
Unigene0004160	4.89284	11.2922	1.20658	9.8608e-07	1.52112e-05	0	0	0	0	0
Unigene0019046	2.43403	5.61748	1.20658	9.8608e-07	1.52145e-05	PGR50like protein [Medicago truncatula]	0	GO:0009536//plastid	0	0
Unigene0004107	1.14454	2.64147	1.20658	9.8608e-07	1.52179e-05	PREDICTED: protein notum homolog [Vitis vinifera]	0	0	0	0
Unigene0041745	14.4019	33.2501	1.2071	5.48596e-11	1.45839e-09	0	0	0	0	0
Unigene0040069	3.48677	8.05964	1.20882	2.26856e-07	3.8608e-06	0	0	0	0	0
Unigene0034675	5.4249	12.5425	1.20915	6.14278e-06	8.18675e-05	0	0	0	0	0
Unigene0041635	5.45391	12.6095	1.20915	6.14278e-06	8.18831e-05	0	0	0	0	0
Unigene0050078	3.7316	8.64126	1.21145	8.18946e-05	0.000848615	Serine carboxypeptidase0like protein [Medicago truncatula]	ko04142//Lysosome;ko04614//Renin0angiotensin system	0	GO:0004180//carboxypeptidase activity	GO:0019538//protein metabolic process
Unigene0015307	2.48133	5.7489	1.21217	1.21723e-08	2.45016e-07	0	0	0	0	0
Unigene0085971	2.57546	5.96738	1.21227	1.82077e-14	9.12324e-13	transposon protein0like [Arabidopsis thaliana]	0	0	0	0
Unigene0024530	5.48981	12.725	1.21284	5.87194e-09	1.23335e-07	0	0	0	0	0
Unigene0043895	31.2563	72.4823	1.21348	0	0	0	0	0	0	0
Unigene0049117	2.26955	5.27384	1.21645	8.31306e-09	1.7117e-07	PREDICTED: oleosin0B40like [Cicer arietinum]	0	0	0	0
Unigene0048822	5.73921	13.3387	1.21669	1.99354e-06	2.89962e-05	0	0	0	0	0
Unigene0037451	38.4686	89.5338	1.21875	0	0	IQ domain0containing protein [Medicago truncatula]	0	0	GO:0003824//catalytic activity	0
Unigene0026523	2.43554	5.66905	1.21887	1.05889e-10	2.73503e-09	S0locus0specific glycoprotein S6 [Medicago truncatula]	0	0	GO:0004672//protein kinase activity;GO:0032550	GO:0006796//phosphate0containing compound metabolic process;GO:0006464//protein modification process;GO:0008037//cell recognition
Unigene0044137	5.5666	12.9695	1.22025	5.53692e-05	0.000598543	0	0	0	0	0
Unigene0034310	4.40528	10.2684	1.22091	2.62404e-05	0.000305284	0	0	0	0	0
Unigene0003312	3.30685	7.71102	1.22146	1.24691e-05	0.000156476	PREDICTED: calcium0transporting ATPase 9, plasma membrane0type0like [Cicer arietinum]	0	GO:0016020//membrane	GO:1901363;GO:0019829//cation0transporting ATPase activity;GO:0043167//ion binding;GO:0036094;GO:0097159	GO:0032989;GO:0003006//developmental process involved in reproduction;GO:0045229//external encapsulating structure organization;GO:0006816//calcium ion transport;GO:0009555//pollen development;GO:0051704
Unigene0007743	2.14354	4.99838	1.22146	1.24691e-05	0.000156504	PREDICTED: uncharacterized aarF domain0containing protein kinase At1g79600, chloroplastic0like isoform X1 [Cicer arietinum]	0	GO:0009570//chloroplast stroma;GO:0016020//membrane	GO:0016301//kinase activity;GO:0032550	GO:0006796//phosphate0containing compound metabolic process;GO:0006464//protein modification process
Unigene0023044	20.2862	47.3103	1.22165	0	0	Translocase of chloroplast [Medicago truncatula]	0	GO:0009527//plastid outer membrane	GO:0032550;GO:0017111//nucleoside0triphosphatase activity;GO:0008320//protein transmembrane transporter activity	GO:0006605//protein targeting;GO:0051644;GO:0009154
Unigene0083096	7.15298	16.6842	1.22187	6.22168e-13	2.40387e-11	Small subunit processome component0like protein [Medicago truncatula]	0	0	0	0
Unigene0014629	0.831707	1.94005	1.22195	5.93898e-06	7.94385e-05	PREDICTED: probable serine/threonine0protein kinase At1g546100like isoform X1 [Cicer arietinum]	0	0	GO:0004672//protein kinase activity;GO:0032550	GO:0006464//protein modification process
Unigene0085360	1.98847	4.63832	1.22195	5.93898e-06	7.94537e-05	0	0	0	0	0
Unigene0050953	2.64648	6.17501	1.22237	2.83446e-06	4.02577e-05	0	0	0	0	0
Unigene0003945	0.71713	1.67408	1.22306	6.48996e-07	1.03017e-05	PREDICTED: scarecrow0like protein 280like [Cicer arietinum]	0	0	0	GO:0048447;GO:0048446//petal morphogenesis;GO:1902410;GO:0007017//microtubule0based process;GO:0006351//transcription, DNA0dependent
Unigene0043995	4.12844	9.66077	1.22654	0	0	Squamosa promoter binding protein [Medicago truncatula]	0	0	0	GO:0009553//embryo sac development;GO:0009555//pollen development;GO:0003006//developmental process involved in reproduction
Unigene0003431	4.4982	10.5405	1.22852	1.77658e-05	0.000215755	0	0	0	0	0
Unigene0010270	1.25752	2.94671	1.22852	2.35738e-08	4.58318e-07	PREDICTED: 650kDa microtubule0associated protein 50like [Cicer arietinum]	0	GO:0005911//cell0cell junction;GO:0005881//cytoplasmic microtubule	GO:0015631//tubulin binding	GO:0031109//microtubule polymerization or depolymerization;GO:0022402//cell cycle process
Unigene0037440	2.21788	5.19709	1.22852	1.92508e-06	2.81113e-05	polyprotein [Glycine max]	0	0	GO:0003676//nucleic acid binding	GO:0043170;GO:0044238//primary metabolic process
Unigene0039534	1.56047	3.6566	1.22852	8.45212e-06	0.000109784	PREDICTED: alcohol dehydrogenase0like 50like [Cicer arietinum]	0	0	0	0
Unigene0046534	7.54023	17.6687	1.22852	1.44466e-10	3.67456e-09	0	0	0	0	0
Unigene0049218	2.79579	6.55127	1.22852	8.04912e-13	2.99911e-11	PREDICTED: probable leucine0rich repeat receptor0like serine/threonine0protein kinase At3g148400like isoform X2 [Cicer arietinum]	0	0	GO:0004672//protein kinase activity;GO:0032550	GO:0009605//response to external stimulus;GO:0009607//response to biotic stimulus;GO:0006464//protein modification process;GO:0010243//response to organic nitrogen
Unigene0053841	1.08912	2.55209	1.22852	8.45212e-06	0.000109804	0	0	0	0	0
Unigene0022909	0.393949	0.923126	1.22852	7.91136e-05	0.000822962	Leucine0rich repeat receptor0like protein kinase PEPR2 [Medicago truncatula]	0	0	GO:0016772//transferase activity, transferring phosphorus0containing groups	GO:0034968//histone lysine methylation;GO:0006796//phosphate0containing compound metabolic process;GO:0006305
Unigene0051076	2.76493	6.47895	1.22852	7.91136e-05	0.00082284	0	0	0	0	0
Unigene0017279	14.8383	34.8654	1.23247	3.73864e-09	8.02845e-08	0	0	0	0	0
Unigene0049715	3.85209	9.05119	1.23247	3.73864e-09	8.02599e-08	0	0	0	0	0
Unigene0044593	15.6481	36.7709	1.23258	1.83853e-13	8.15109e-12	PREDICTED: callose synthase 30like [Cicer arietinum]	0	0	0	0
Unigene0004070	1.6613	3.90423	1.23273	2.62012e-14	1.29892e-12	PREDICTED: DNA polymerase delta catalytic subunit0like [Cicer arietinum]	ko00230//Purine metabolism;ko00240//Pyrimidine metabolism;ko03440//Homologous recombination;ko03420//Nucleotide excision repair;ko03410//Base excision repair;ko03030//DNA replication;ko03430//Mismatch repair	0	0	0
Unigene0057852	0.841557	1.97879	1.23349	1.44177e-07	2.52361e-06	Verticillium wilt disease resistance protein [Medicago truncatula]	0	0	0	0
Unigene0041949	42.9105	100.905	1.23359	0	0	0	0	0	0	0
Unigene0034566	3.26688	7.69345	1.23571	1.20279e-05	0.000151591	GEM0like protein [Medicago truncatula]	0	0	0	0
Unigene0014641	0.687708	1.62096	1.23698	5.34086e-05	0.000578241	PREDICTED: protein transport protein SEC310like [Cicer arietinum]	ko03015//mRNA surveillance pathway	0	0	0
Unigene0004800	29.5843	69.8103	1.23861	2.49356e-13	1.07226e-11	0	0	0	0	0
Unigene0003735	2.6359	6.22072	1.23879	2.04184e-07	3.49362e-06	0	0	0	0	0
Unigene0012315	3.64243	8.6063	1.24049	3.6018e-09	7.76554e-08	polyprotein [Glycine max]	0	0	GO:0003676//nucleic acid binding;GO:0003824//catalytic activity	GO:0006259//DNA metabolic process
Unigene0004056	42.3832	100.164	1.24079	5.8531e-12	1.77799e-10	18S pre0ribosomal assembly protein gar20related protein [Arabidopsis thaliana]	0	0	0	0
Unigene0037090	7.70051	18.2084	1.24158	3.88296e-06	5.37014e-05	0	0	0	0	0
Unigene0051715	4.01294	9.48887	1.24158	6.50368e-11	1.71851e-09	gag0pol polyprotein [Populus deltoides]	ko00230//Purine metabolism	0	GO:0005488//binding	0
Unigene0012627	2.33181	5.51734	1.24253	8.14318e-06	0.000106343	0	0	0	0	0
Unigene0039270	4.56621	10.8042	1.24253	8.14318e-06	0.000106303	Auxin0induced protein0like protein [Medicago truncatula]	ko04075//Plant hormone signal transduction	0	0	0
Unigene0052184	1.80783	4.27755	1.24253	8.14318e-06	0.000106323	0	0	0	0	0
Unigene0083423	14.4256	34.144	1.24301	0	0	PREDICTED: ribosomal RNA small subunit methyltransferase I0like isoform X1 [Cicer arietinum]	0	0	0	0
Unigene0028986	2.07027	4.90225	1.24363	1.71145e-05	0.000209224	0	0	0	0	0
Unigene0023214	3.69188	8.74716	1.24446	2.89106e-07	4.83216e-06	Amino acid permease [Medicago truncatula]	0	GO:0031224//intrinsic to membrane	0	0
Unigene0050375	3.47912	8.24568	1.24491	3.60588e-05	0.000406286	0	0	0	0	0
Unigene0002776	1.75264	4.15521	1.24539	6.02762e-07	9.60266e-06	UDP0glycosyltransferase [Medicago truncatula]	0	0	GO:0016757//transferase activity, transferring glycosyl groups	0
Unigene0039482	10.2948	24.4116	1.24564	1.05422e-08	2.13615e-07	PREDICTED: auxin response factor 190like isoform X3 [Cicer arietinum]	0	GO:0043231//intracellular membrane0bounded organelle	GO:0003676//nucleic acid binding;GO:0005515//protein binding	GO:0009755//hormone0mediated signaling pathway;GO:0006351//transcription, DNA0dependent
Unigene0007228	9.33224	22.1381	1.24623	0	0	PREDICTED: growth0regulating factor 50like isoform X1 [Cicer arietinum]	0	0	0	GO:0009791//post0embryonic development;GO:0048608//reproductive structure development;GO:0048367//shoot development
Unigene0005723	0.983388	2.33314	1.24644	7.61922e-05	0.000795645	PREDICTED: phosphatidate cytidylyltransferase0like [Cicer arietinum]	0	0	0	0
Unigene0034306	3.1396	7.44888	1.24644	7.61922e-05	0.000795764	0	0	0	0	0
Unigene0049021	5.883	13.9662	1.24732	4.54162e-08	8.5314e-07	PREDICTED: transcription factor TCP50like [Cicer arietinum]	0	0	0	0
Unigene0044095	30.2187	71.7719	1.24798	8.88178e-15	4.51823e-13	ATP synthase subunit beta [Medicago truncatula]	0	0	0	0
Unigene0043512	12.9509	30.7808	1.24898	7.63834e-14	3.60794e-12	PREDICTED: GDSL esterase/lipase At4g287800like [Glycine max]	0	0	GO:0016787//hydrolase activity	GO:0044238//primary metabolic process
Unigene0006031	2.54446	6.04838	1.24919	4.8772e-12	1.50836e-10	PREDICTED: glucan endo01,30beta0glucosidase 120like [Cicer arietinum]	0	0	GO:0003824//catalytic activity	0
Unigene0008461	14.1802	33.7277	1.25005	4.77396e-13	1.91092e-11	PREDICTED: receptor protein kinase0like protein At4g342200like [Cicer arietinum]	0	GO:0016020//membrane	GO:0016301//kinase activity	GO:0044237//cellular metabolic process
Unigene0041116	6.85191	16.3028	1.25055	4.09244e-07	6.69167e-06	NBS0LRR resistance0like protein 4G [Medicago truncatula]	0	0	GO:0032550	GO:0006950//response to stress;GO:0007154//cell communication
Unigene0046865	12.1573	28.9545	1.25196	5.94858e-13	2.30854e-11	PREDICTED: kinesin0like protein KIN12A0like [Cicer arietinum]	0	GO:0005875//microtubule associated complex;GO:0044444//cytoplasmic part	GO:0032550;GO:0003777//microtubule motor activity;GO:0015631//tubulin binding	GO:0000226//microtubule cytoskeleton organization;GO:0044786;GO:0000911//cytokinesis by cell plate formation;GO:0006461//protein complex assembly;GO:0048446//petal morphogenesis;GO:0006305;GO:0006342//chromatin silencing;GO:0048447;GO:0009555//pollen development;GO:0048285;GO:0034968//histone lysine methylation;GO:0000086//G2/M transition of mitotic cell cycle
Unigene0037615	51.8439	123.475	1.25198	0	0	0	0	0	0	0
Unigene0038185	6.54814	15.5984	1.25224	0	0	Cytokinin0O0glucosyltransferase [Medicago truncatula]	0	0	GO:0016757//transferase activity, transferring glycosyl groups	0
Unigene0031768	5.84878	13.9336	1.25237	2.43476e-05	0.000285157	PREDICTED: mitochondrial outer membrane protein porin 60like isoform X2 [Cicer arietinum]	ko05016//Huntington's disease;ko05012//Parkinson's disease;ko04020//Calcium signaling pathway	GO:0031966//mitochondrial membrane	0	GO:0044765;GO:0044763;GO:0051707//response to other organism
Unigene0025736	3.05284	7.27802	1.25339	1.78362e-06	2.61931e-05	0	0	0	0	0
Unigene0053597	1.60153	3.82103	1.25451	5.13608e-05	0.000559616	0	0	0	0	0
Unigene0014735	2.15707	5.15152	1.25593	1.60782e-09	3.60634e-08	0	0	0	0	0
Unigene0041077	12.9659	30.9754	1.2564	0	0	0	0	0	0	0
Unigene0041985	33.4306	79.9035	1.25709	7.59392e-14	3.58938e-12	0	0	0	0	0
Unigene0084470	2.93261	7.01381	1.25801	2.18936e-13	9.54934e-12	Ankyrin repeat0containing protein [Medicago truncatula]	0	0	0	0
Unigene0084484	1.44332	3.4552	1.25938	1.64416e-05	0.00020142	0	0	0	0	0
Unigene0034461	0.868255	2.08242	1.26207	3.46282e-05	0.000391743	0	0	0	0	0
Unigene0004293	0.897448	2.15472	1.2636	9.72126e-09	1.97553e-07	ADP0ribosylation factor GTPase0activating protein AGD3 [Medicago truncatula]	ko04144//Endocytosis	GO:0005798//Golgi0associated vesicle;GO:0016020//membrane	GO:0005543//phospholipid binding;GO:0032550;GO:0005083//small GTPase regulator activity;GO:0046914//transition metal ion binding;GO:0016301//kinase activity	GO:0010087//phloem or xylem histogenesis;GO:0007015//actin filament organization;GO:0003006//developmental process involved in reproduction;GO:0009799//specification of symmetry;GO:0032012//regulation of ARF protein signal transduction;GO:0010053//root epidermal cell differentiation;GO:0000904//cell morphogenesis involved in differentiation;GO:0040007//growth;GO:0022610;GO:0045229//external encap…
Unigene0001919	3.61343	8.68159	1.26459	2.45762e-10	6.06175e-09	0	0	0	0	0
Unigene0048762	3.44365	8.2758	1.26496	3.91446e-11	1.0514e-09	0	0	0	0	0
Unigene0048432	4.82876	11.6071	1.26528	2.01586e-08	3.95211e-07	0	0	0	0	0
Unigene0084157	1.87106	4.49754	1.26528	7.31368e-05	0.000767055	0	0	0	0	0
Unigene0082310	1.36424	3.27927	1.26528	7.31368e-05	0.00076717	0	0	0	0	0
Unigene0006396	0.890163	2.14078	1.26599	1.1104e-05	0.000140809	PREDICTED: pentatricopeptide repeat0containing protein At1g77360, mitochondrial0like [Cicer arietinum]	0	0	0	0
Unigene0084088	2.15039	5.17154	1.26599	1.1104e-05	0.000140783	Zinc finger A20 and AN1 domain0containing stress0associated protein [Medicago truncatula]	0	0	0	0
Unigene0052084	2.06602	4.96955	1.26626	8.12108e-11	2.12504e-09	MLO1 [Pisum sativum]	0	GO:0016020//membrane;GO:0043231//intracellular membrane0bounded organelle	0	GO:0010033//response to organic substance;GO:0050832//defense response to fungus;GO:0007165//signal transduction;GO:0031347//regulation of defense response;GO:0045087//innate immune response
Unigene0034636	3.18215	7.65547	1.26649	1.71096e-06	2.52159e-05	hypothetical protein MTR_1g099830 [Medicago truncatula]	0	0	0	0
Unigene0028325	2.41842	5.8289	1.26916	4.39648e-14	2.14016e-12	0	0	0	0	0
Unigene0049713	4.24193	10.224	1.26916	2.3351e-05	0.000274633	0	0	0	0	0
Unigene0044732	13.3481	32.1905	1.27	0	0	PREDICTED: protein timeless homolog isoform X3 [Cicer arietinum]	0	0	0	0
Unigene0082340	6.91198	16.674	1.27043	2.89214e-12	9.50242e-11	0	0	0	0	0
Unigene0028580	4.03643	9.73961	1.27078	7.14684e-10	1.67043e-08	0	0	0	0	0
Unigene0005451	14.2173	34.3339	1.27199	3.76086e-11	1.01169e-09	Multidrug resistance protein ABC transporter family [Medicago truncatula]	0	0	0	0
Unigene0008675	6.64584	16.0521	1.27224	7.50004e-06	9.83471e-05	ABC transporter [Medicago truncatula]	0	0	0	0
Unigene0057825	1.87863	4.53758	1.27224	7.50004e-06	9.83287e-05	Os03g0739700 [Oryza sativa Japonica Group]	0	0	0	0
Unigene0084862	2.527	6.10647	1.27291	9.3118e-09	1.90114e-07	0	0	0	0	0
Unigene0041512	25.4165	61.4238	1.27303	1.9762e-13	8.70085e-12	0	0	0	0	0
Unigene0013473	5.11623	12.3673	1.27337	5.89976e-08	1.09014e-06	0	0	0	0	0
Unigene0007467	2.76469	6.68932	1.27474	2.4206e-06	3.47674e-05	0	0	0	0	0
Unigene0049281	5.37633	13.0326	1.27743	1.23457e-13	5.62656e-12	PREDICTED: auxin response factor 180like [Cicer arietinum]	0	0	GO:0005488//binding	GO:0009725//response to hormone stimulus;GO:0050794//regulation of cellular process;GO:0006351//transcription, DNA0dependent
Unigene0044319	3.8577	9.356	1.27815	5.06632e-06	6.85647e-05	0	0	0	0	0
Unigene0081584	5.02946	12.1978	1.27815	1.09065e-10	2.80982e-09	0	0	0	0	0
Unigene0021702	3.09406	7.50396	1.27815	5.06632e-06	6.85779e-05	0	0	0	0	0
Unigene0085447	2.833	6.87403	1.27882	1.31102e-08	2.62689e-07	Auxin0responsive protein IAA18 [Medicago truncatula]	0	0	0	0
Unigene0045829	19.0538	46.246	1.27925	1.87161e-12	6.39535e-11	0	0	0	0	0
Unigene0023117	1.24341	3.01959	1.28005	1.63725e-06	2.42161e-05	0	0	0	0	0
Unigene0048284	4.3207	10.4927	1.28005	8.3155e-08	1.50983e-06	NBS0containing resistance0like protein [Medicago truncatula]	0	0	GO:0043167//ion binding;GO:0003824//catalytic activity;GO:0032550	GO:0006950//response to stress
Unigene0016869	2.17381	5.28248	1.28099	7.42964e-11	1.95287e-09	Molybdopterin biosynthesis CNX1 protein [Medicago truncatula]	0	0	0	0
Unigene0003003	1.36242	3.3133	1.2821	1.06237e-05	0.000135281	AF4/FMR2 family member 1 [Theobroma cacao]	0	0	0	0
Unigene0010148	0.770389	1.87353	1.2821	1.06237e-05	0.000135305	Flap endonuclease GEN0like protein [Medicago truncatula]	0	GO:0043231//intracellular membrane0bounded organelle	GO:0003676//nucleic acid binding;GO:0004518//nuclease activity	GO:0006259//DNA metabolic process
Unigene0045644	8.68178	21.1146	1.28218	4.51638e-13	1.81716e-11	expressed protein [Populus tremula]	0	0	0	0
Unigene0040196	3.14991	7.66912	1.28375	3.42272e-06	4.77796e-05	Fgenesh protein [Medicago truncatula]	0	0	0	GO:0044763
Unigene0049306	4.92847	12.0041	1.28432	9.60702e-10	2.20643e-08	PREDICTED: succinate dehydrogenase [ubiquinone] flavoprotein subunit 1, mitochondrial0like isoform X1 [Cicer arietinum]	ko00190//Oxidative phosphorylation;ko05016//Huntington's disease;ko05012//Parkinson's disease;ko05010//Alzheimer's disease;ko00020//Citrate cycle (TCA cycle)	0	GO:0000104//succinate dehydrogenase activity;GO:0000166//nucleotide binding	GO:0009060//aerobic respiration
Unigene0050086	3.10946	7.57363	1.28432	9.60702e-10	2.20571e-08	0	0	0	0	0
Unigene0037341	41.2617	100.554	1.2851	8.35554e-13	3.10338e-11	0	0	0	0	0
Unigene0083887	0.734652	1.79034	1.2851	6.9955e-05	0.000737549	PREDICTED: DNA0directed RNA polymerase III subunit RPC20like [Cicer arietinum]	ko00230//Purine metabolism;ko00240//Pyrimidine metabolism;ko03020//RNA polymerase;ko04623//Cytosolic DNA0sensing pathway	0	0	0
Unigene0003119	4.66765	11.375	1.2851	1.10748e-06	1.69495e-05	0	0	0	0	0
Unigene0086753	2.65408	6.46907	1.28534	3.1175e-13	1.30531e-11	PREDICTED: chromosome0associated kinesin KIF40like isoform X1 [Cicer arietinum]	0	0	0	0
Unigene0003627	1.67302	4.07827	1.2855	2.84218e-14	1.40206e-12	ABC transporter family pleiotropic drug resistance protein [Medicago truncatula]	0	0	GO:0017111//nucleoside0triphosphatase activity;GO:0032550	GO:0009154
Unigene0002947	2.85399	6.96302	1.28673	2.23242e-05	0.00026393	PREDICTED: purple acid phosphatase0like [Cicer arietinum]	0	GO:0005911//cell0cell junction;GO:0005618//cell wall;GO:0044444//cytoplasmic part	GO:0043169//cation binding;GO:0016791//phosphatase activity	GO:0009267//cellular response to starvation
Unigene0049229	0.593135	1.44839	1.28802	7.16754e-06	9.45535e-05	PREDICTED: serine/threonine0protein kinase ppk40like [Cicer arietinum]	ko04141//Protein processing in endoplasmic reticulum;ko05010//Alzheimer's disease	0	GO:0004672//protein kinase activity;GO:0004518//nuclease activity	GO:0006396//RNA processing;GO:0044763;GO:0006796//phosphate0containing compound metabolic process
Unigene0031954	0.475819	1.16192	1.28802	7.16754e-06	9.45179e-05	PREDICTED: receptor0like protein kinase0like [Cicer arietinum]	0	GO:0016020//membrane	GO:1901363;GO:0004672//protein kinase activity;GO:0036094;GO:0097159	GO:0071704;GO:0006796//phosphate0containing compound metabolic process;GO:0007165//signal transduction;GO:0044238//primary metabolic process;GO:0006950//response to stress;GO:0009725//response to hormone stimulus
Unigene0051423	0.999689	2.44117	1.28802	7.16754e-06	9.45357e-05	PREDICTED: major facilitator superfamily domain0containing protein 120like isoform X1 [Cicer arietinum]	0	0	0	0
Unigene0051218	1.76439	4.31162	1.28906	2.31258e-06	3.3291e-05	0	0	0	0	0
Unigene0082443	1.00252	2.44984	1.28906	2.31258e-06	3.32773e-05	PREDICTED: micronuclear linker histone polyprotein0like isoform X1 [Cicer arietinum]	0	0	0	0
Unigene0050690	2.45332	5.99515	1.28906	2.31258e-06	3.32841e-05	0	0	0	0	0
Unigene0019589	3.63256	8.88213	1.28992	7.4918e-07	1.17825e-05	0	0	0	0	0
Unigene0030467	6.68298	16.3408	1.28992	1.34935e-09	3.05595e-08	PREDICTED: probable acyl0activating enzyme 18, peroxisomal0like [Cicer arietinum]	0	0	0	0
Unigene0002355	3.80908	9.3184	1.29064	2.43532e-07	4.12256e-06	0	0	0	0	0
Unigene0048737	6.68555	16.3553	1.29064	2.43532e-07	4.12157e-06	0	0	0	0	0
Unigene0050703	2.2664	5.55656	1.29379	3.9524e-14	1.93339e-12	reverse transcriptase, partial [Raphanus sativus]	0	0	0	0
Unigene0049508	3.69149	9.05246	1.29411	1.56268e-06	2.32261e-05	PREDICTED: protein RDM10like isoform X6 [Cicer arietinum]	0	GO:0043231//intracellular membrane0bounded organelle	GO:0005515//protein binding	GO:0031047//gene silencing by RNA;GO:0006306//DNA methylation
Unigene0021114	3.61645	8.86934	1.29425	0	0	0	0	0	0	0
Unigene0002827	2.87899	7.06104	1.29432	3.41794e-12	1.09727e-10	0	0	0	0	0
Unigene0002751	3.84269	9.42708	1.2947	3.39506e-13	1.41308e-11	0	0	0	0	0
Unigene0085336	2.18496	5.36197	1.29516	5.38108e-08	1.00117e-06	hypothetical protein MTR_2g030510 [Medicago truncatula]	0	0	0	0
Unigene0013684	1.6998	4.17275	1.29563	7.30526e-14	3.46463e-12	SYM10 protein [Pisum sativum]	0	0	GO:0004672//protein kinase activity;GO:0032550	GO:0006468//protein phosphorylation;GO:0044036
Unigene0034485	10.4298	25.6155	1.2963	5.2891e-13	2.08613e-11	PREDICTED: transcriptional activator Myb0like [Cicer arietinum]	0	GO:0043231//intracellular membrane0bounded organelle	GO:0017076//purine nucleotide binding;GO:0016772//transferase activity, transferring phosphorus0containing groups;GO:0003676//nucleic acid binding	GO:0006796//phosphate0containing compound metabolic process
Unigene0041822	55.2076	135.589	1.29631	4.15224e-12	1.31077e-10	PREDICTED: hydroxycinnamoyl0Coenzyme A shikimate/quinate hydroxycinnamoyltransferase0like [Glycine max]	0	0	0	0
Unigene0002618	2.42153	5.958	1.29891	3.16216e-05	0.000360583	0	0	0	0	0
Unigene0021088	1.60782	3.95591	1.29891	1.11687e-07	1.98769e-06	PREDICTED: coiled0coil domain0containing protein 93 homolog [Cicer arietinum]	0	GO:0043231//intracellular membrane0bounded organelle	0	0
Unigene0030865	8.65681	21.2994	1.29891	4.23188e-10	1.01277e-08	0	0	0	0	0
Unigene0034549	3.62624	8.9221	1.29891	4.23188e-10	1.01243e-08	Flowering time control protein FPA [Medicago truncatula]	0	0	0	0
Unigene0038107	7.67459	18.8828	1.29891	3.91506e-09	8.3816e-08	PREDICTED: nuclear pore membrane glycoprotein 2100like [Cicer arietinum]	ko03013//RNA transport	GO:0012505//endomembrane system;GO:0043231//intracellular membrane0bounded organelle	0	GO:0003006//developmental process involved in reproduction
Unigene0051382	1.84073	4.52899	1.29891	3.16216e-05	0.000360642	0	0	0	0	0
Unigene0015408	4.68177	11.5191	1.29891	1.05607e-06	1.62123e-05	Zinc finger CCCH domain0containing protein [Medicago truncatula]	0	0	GO:0046872//metal ion binding	GO:0044260;GO:0044238//primary metabolic process
Unigene0086848	3.86108	9.51849	1.30173	2.87464e-10	7.02602e-09	GPI0anchored wall transfer protein [Medicago truncatula]	ko00563//Glycosylphosphatidylinositol(GPI)0anchor biosynthesis	0	0	0
Unigene0034402	3.75192	9.26348	1.30393	0	0	PREDICTED: exocyst complex component 70like isoform 1 [Glycine max]	ko04910//Insulin signaling pathway	GO:0043234//protein complex	0	GO:0006887//exocytosis
Unigene0006415	1.39406	3.44483	1.30514	2.12706e-05	0.000253313	Cc0nbs0lrr resistance protein [Medicago truncatula]	0	0	0	0
Unigene0037585	4.32405	10.6914	1.306	6.66564e-05	0.000706493	0	0	0	0	0
Unigene0007324	1.07924	2.66847	1.306	6.66564e-05	0.0007066	PREDICTED: DUF246 domain0containing protein At1g049100like [Glycine max]	0	0	0	0
Unigene0033278	3.44571	8.52908	1.30759	4.02734e-10	9.67791e-09	Leucine0rich repeat protein soc020like protein [Medicago truncatula]	0	0	0	0
Unigene0022851	4.15356	10.283	1.30784	4.82476e-07	7.8035e-06	Glycine0rich RNA0binding protein [Medicago truncatula]	0	GO:0043231//intracellular membrane0bounded organelle	GO:0036094;GO:0097159	0
Unigene0037618	47.6039	117.859	1.30791	7.21644e-14	3.42715e-12	0	0	0	0	0
Unigene0005473	1.45667	3.61414	1.31098	1.43123e-05	0.000177539	PREDICTED: myb0like protein X0like [Cicer arietinum]	0	0	0	0
Unigene0013151	9.3902	23.3076	1.31157	2.02228e-11	5.64152e-10	0	0	0	0	0
Unigene0033773	1.50666	3.74083	1.312	3.26164e-07	5.40385e-06	GCN50related N0acetyltransferase; BRCT [Medicago truncatula]	0	GO:0043231//intracellular membrane0bounded organelle	GO:0016407//acetyltransferase activity	0
Unigene0030576	4.37248	10.8606	1.31258	4.47494e-05	0.000494424	0	0	0	0	0
Unigene0033955	6.09794	15.1464	1.31258	4.47494e-05	0.000494346	PREDICTED: beta0galactosidase 80like [Glycine max]	0	0	GO:0005488//binding;GO:0015925	GO:0044238//primary metabolic process;GO:0071704
Unigene0007627	4.62421	11.4909	1.31322	4.36628e-12	1.36908e-10	PREDICTED: U0box domain0containing protein 430like [Glycine max]	0	GO:0043234//protein complex	GO:0019787//small conjugating protein ligase activity	GO:0032446//protein modification by small protein conjugation
Unigene0081619	1.47102	3.65542	1.31322	1.00435e-06	1.54658e-05	Binding isoform 1 [Theobroma cacao]	0	0	0	0
Unigene0031978	8.67983	21.5718	1.31341	7.4829e-14	3.54648e-12	0	0	0	0	0
Unigene0014085	48.7247	121.201	1.31468	0	0	Cysteine synthase [Medicago truncatula]	ko00270//Cysteine and methionine metabolism;ko00920//Sulfur metabolism	GO:0043231//intracellular membrane0bounded organelle	GO:0016835//carbon0oxygen lyase activity	GO:0006563//L0serine metabolic process;GO:0000097//sulfur amino acid biosynthetic process
Unigene0018333	1.55616	3.87088	1.31468	3.10382e-06	4.36498e-05	0	0	0	0	0
Unigene0044688	16.0594	40.0007	1.31661	0	0	PREDICTED: PI0PLC X domain0containing protein At5g671300like [Cicer arietinum]	0	0	0	0
Unigene0003218	4.6708	11.6414	1.31752	6.78248e-07	1.07344e-05	PREDICTED: OTU domain0containing protein DDB_G02847570like [Cucumis sativus]	0	0	0	0
Unigene0007747	1.27196	3.17021	1.31752	6.78248e-07	1.07369e-05	0	0	0	0	0
Unigene0016999	340.665	849.449	1.31817	0	0	trypsin inhibitor [Pisum sativum]	0	0	0	0
Unigene0013548	1.56304	3.8989	1.31872	3.00548e-05	0.000344681	0	0	0	0	0
Unigene0040156	1.08759	2.71293	1.31872	3.00548e-05	0.000344568	RNA0directed DNA polymerase (Reverse transcriptase); Chromo; Zinc finger, CCHC0type; Peptidase aspartic, active site; Polynucleotidyl transferase, Ribonuclease H fold [Medicago truncatula]	0	0	GO:0005488//binding;GO:0003824//catalytic activity	GO:0009987//cellular process;GO:0044238//primary metabolic process;GO:0043170
Unigene0054088	0.674589	1.68272	1.31872	3.00548e-05	0.000344624	0	0	0	0	0
Unigene0016233	0.86175	2.15056	1.31937	2.09314e-06	3.03127e-05	0	0	0	0	0
Unigene0043274	30.0588	75.044	1.31995	1.35292e-12	4.75756e-11	PREDICTED: tryptophan aminotransferase0related protein 20like isoform X1 [Cicer arietinum]	0	0	0	0
Unigene0004507	2.13121	5.32195	1.32028	7.88614e-10	1.83466e-08	Zinc finger protein CONSTANS0like protein [Medicago truncatula]	0	0	0	0
Unigene0018619	1.2034	3.00787	1.32163	6.4856e-06	8.61904e-05	Speckle0type POZ protein0like protein [Medicago truncatula]	0	0	0	0
Unigene0025654	2.84783	7.11811	1.32163	6.4856e-06	8.61577e-05	0	0	0	0	0
Unigene0057362	0.983017	2.45703	1.32163	6.4856e-06	8.61741e-05	pentatricopeptide repeat0containing protein [Arabidopsis lyrata subsp. lyrata]	0	0	0	GO:0007275//multicellular organismal development;GO:0048856//anatomical structure development
Unigene0004751	1.87145	4.68145	1.3228	3.94714e-11	1.05977e-09	PREDICTED: aspartic proteinase Asp10like [Cicer arietinum]	0	0	0	0
Unigene0084148	17.717	44.3194	1.3228	9.68114e-14	4.49406e-12	PREDICTED: protein strawberry notch0like isoform X1 [Cicer arietinum]	0	0	0	0
Unigene0021422	1.44905	3.62894	1.32444	2.01934e-05	0.000242131	Receptor0like protein kinase [Medicago truncatula]	0	0	GO:0097159;GO:0016301//kinase activity;GO:1901363;GO:0036094	GO:0044238//primary metabolic process;GO:0044260;GO:0016310//phosphorylation
Unigene0042104	74.2758	186.026	1.32454	2.6712e-13	1.13886e-11	0	0	0	0	0
Unigene0010906	3.09695	7.75835	1.3249	2.22972e-08	4.34948e-07	0	0	0	0	0
Unigene0027975	1.88185	4.71643	1.32554	3.0944e-07	5.14868e-06	PREDICTED: protein DEHYDRATION0INDUCED 19 homolog 60like [Glycine max]	0	0	0	0
Unigene0047224	10.196	25.554	1.32554	4.27214e-13	1.73685e-11	U0box domain0containing protein [Medicago truncatula]	0	0	0	0
Unigene0023031	6.08978	15.2703	1.32627	1.09024e-13	5.0046e-12	HVA220like protein a [Medicago truncatula]	0	0	GO:0005488//binding	0
Unigene0006577	0.670319	1.68111	1.32649	4.36768e-06	5.99083e-05	PREDICTED: dynamin0related protein 1E0like [Cicer arietinum]	0	0	GO:0017111//nucleoside0triphosphatase activity;GO:0032550	GO:0009154
Unigene0051448	1.36464	3.4224	1.32649	4.36768e-06	5.992e-05	0	0	0	0	0
Unigene0005075	5.1127	12.8327	1.32767	1.46994e-13	6.62171e-12	0	0	0	0	0
Unigene0010346	7.71541	19.3706	1.32805	1.50944e-08	3.00554e-07	0	0	0	0	0
Unigene0034303	0.878329	2.20517	1.32805	6.3252e-05	0.000673365	0	0	0	0	0
Unigene0049463	1.46557	3.67952	1.32805	6.3252e-05	0.000673467	TO109012 [Taraxacum officinale]	0	0	0	0
Unigene0050882	1.86512	4.68831	1.3298	1.35729e-05	0.000169146	0	0	0	0	0
Unigene0053566	1.28397	3.22749	1.3298	1.35729e-05	0.000169116	Aquaporin NIP102 [Medicago truncatula]	0	0	0	0
Unigene0016410	2.51285	6.31858	1.33027	4.61222e-08	8.6501e-07	0	0	0	0	0
Unigene0039564	8.78082	22.1051	1.33195	0	0	PREDICTED: MATE efflux family protein ALF50like [Cicer arietinum]	0	0	GO:0015291//secondary active transmembrane transporter activity	GO:0015893//drug transport;GO:0044763
Unigene0003486	4.26711	10.7536	1.33349	0	0	0	0	0	0	0
Unigene0081767	0.774214	1.95111	1.33349	3.11984e-08	5.97762e-07	PREDICTED: tRNA (guanine(37)0N1)0methyltransferase 10like [Cicer arietinum]	0	0	0	0
Unigene0047173	1.91691	4.83146	1.33367	3.88578e-14	1.90213e-12	Receptor0like protein kinase [Medicago truncatula]	0	0	0	0
Unigene0009271	1.60502	4.0463	1.33401	4.24122e-05	0.00047068	Transcription factor bHLH61 isoform 1 [Theobroma cacao]	0	0	0	0
Unigene0030621	2.62378	6.61462	1.33401	4.24122e-05	0.000470605	0	0	0	0	0
Unigene0043865	2.75643	6.95117	1.33445	7.30526e-14	3.46698e-12	Glucose060phosphate/phosphate translocator [Medicago truncatula]	ko00500//Starch and sucrose metabolism;ko00940//Phenylpropanoid biosynthesis;ko00460//Cyanoamino acid metabolism	GO:0031224//intrinsic to membrane	GO:0004553//hydrolase activity, hydrolyzing O0glycosyl compounds	GO:0044238//primary metabolic process
Unigene0045008	17.0428	42.9896	1.33483	7.28972e-13	2.75722e-11	CCP0like protein [Medicago truncatula]	0	0	0	GO:0044763
Unigene0048614	3.99262	10.0712	1.33483	9.1262e-06	0.000117666	0	0	0	0	0
Unigene0029823	7.88646	19.9154	1.33643	0	0	RING finger and CHY zinc finger domain0containing protein 1 isoform 1 [Theobroma cacao]	0	0	0	0
Unigene0021765	0.8499	2.15086	1.33955	2.84528e-05	0.000328027	4Fe04S ferredoxin, iron0sulfur binding [Medicago truncatula]	0	0	GO:0051540	0
Unigene0032842	10.9412	27.6893	1.33955	1.57929e-10	3.98802e-09	0	0	0	0	0
Unigene0046184	3.8171	9.66002	1.33955	1.33602e-06	2.01478e-05	0	0	0	0	0
Unigene0053349	1.45017	3.66997	1.33955	6.13838e-06	8.18556e-05	0	0	0	0	0
Unigene0082413	0.258943	0.655314	1.33955	1.33602e-06	2.01522e-05	Glucan synthase0like 4 [Theobroma cacao]	0	GO:0043234//protein complex;GO:0016020//membrane	GO:0035251//UDP0glucosyltransferase activity	GO:0052386//cell wall thickening;GO:0006074//(10>3)0beta0D0glucan metabolic process;GO:0009555//pollen development
Unigene0009911	7.86492	19.9563	1.34334	0	0	0	0	0	0	0
Unigene0030662	1.47613	3.7458	1.34345	9.00612e-07	1.39666e-05	0	0	0	0	0
Unigene0019766	1.01113	2.56581	1.34345	9.00612e-07	1.39697e-05	RNA0directed DNA polymerase (Reverse transcriptase) [Medicago truncatula]	0	0	GO:0003676//nucleic acid binding;GO:0034061	GO:0006260//DNA replication
Unigene0031269	0.392545	0.996489	1.344	4.13008e-06	5.68832e-05	PREDICTED: nuclear pore complex protein Nup2050like isoform X1 [Cicer arietinum]	ko03013//RNA transport	GO:0005635//nuclear envelope;GO:0009536//plastid	0	0
Unigene0006983	1.00155	2.54372	1.34471	1.90968e-05	0.000230124	Myb0like transcription factor [Medicago truncatula]	0	GO:0043231//intracellular membrane0bounded organelle	GO:0003676//nucleic acid binding;GO:0001071//nucleic acid binding transcription factor activity	GO:0010038//response to metal ion;GO:0009725//response to hormone stimulus;GO:0009813//flavonoid biosynthetic process;GO:0006970//response to osmotic stress;GO:0009699//phenylpropanoid biosynthetic process;GO:0014070//response to organic cyclic compound;GO:0006351//transcription, DNA0dependent
Unigene0025973	1.41991	3.60877	1.3457	8.92692e-05	0.000916625	0	0	0	0	0
Unigene0051139	3.05318	7.75978	1.3457	8.92692e-05	0.000916491	0	0	0	0	0
Unigene0057734	0.618001	1.57067	1.3457	8.92692e-05	0.00091676	0	0	0	0	0
Unigene0005820	1.1634	2.95684	1.3457	8.92692e-05	0.000916357	0	0	0	0	0
Unigene0035551	4.14182	10.5284	1.34595	0	0	Cysteine0rich receptor0like protein kinase [Medicago truncatula]	0	0	GO:0036094;GO:0004672//protein kinase activity;GO:1901363;GO:0097159	GO:0006796//phosphate0containing compound metabolic process
Unigene0002247	2.09069	5.31599	1.34636	1.33464e-07	2.34547e-06	PREDICTED: prolyl endopeptidase0like [Cicer arietinum]	0	0	0	0
Unigene0044884	15.7191	39.9841	1.34691	6.22168e-13	2.40255e-11	PREDICTED: L0ascorbate oxidase homolog isoform X1 [Cicer arietinum]	0	0	0	0
Unigene0047167	8.16468	20.7813	1.34782	4.42436e-09	9.42585e-08	0	0	0	0	0
Unigene0050245	1.30146	3.31978	1.35095	1.01041e-10	2.6185e-09	PREDICTED: type I inositol 1,4,50trisphosphate 50phosphatase 10like isoform X1 [Cicer arietinum]	0	0	GO:0016628//oxidoreductase activity, acting on the CH0CH group of donors, NAD or NADP as acceptor	GO:0046488//phosphatidylinositol metabolic process
Unigene0084034	4.33465	11.0569	1.35095	1.01041e-10	2.61753e-09	0	0	0	0	0
Unigene0035471	1.63836	4.18037	1.35138	5.97546e-05	0.000641199	hypothetical retrotransposon [Ipomoea batatas]	0	0	GO:0046872//metal ion binding	0
Unigene0011919	3.29437	8.40575	1.35138	1.34765e-08	2.69873e-07	Oxygen0evolving enhancer protein [Medicago truncatula]	ko00195//Photosynthesis	0	0	0
Unigene0048439	3.08515	7.8744	1.35183	4.52066e-10	1.0771e-08	PREDICTED: uncharacterized protein LOC101243748 [Solanum lycopersicum]	0	0	0	0
Unigene0018169	0.687062	1.75402	1.35215	1.87139e-06	2.73843e-05	PREDICTED: uncharacterized LOC101207103 [Cucumis sativus]	0	0	0	0
Unigene0048548	5.4363	13.887	1.35303	6.84516e-11	1.80465e-09	PREDICTED: ubiquitin carboxyl0terminal hydrolase 80like [Cicer arietinum]	0	0	0	0
Unigene0027849	5.93581	15.1736	1.35405	8.6138e-06	0.000111615	ripening0related protein [Pisum sativum]	0	0	0	GO:0006950//response to stress
Unigene0037530	1.87447	4.79168	1.35405	8.6138e-06	0.000111635	Disease resistance0like protein GS301 [Medicago truncatula]	0	0	GO:0016787//hydrolase activity;GO:0032550	GO:0006950//response to stress
Unigene0039670	6.60408	16.8819	1.35405	2.76234e-07	4.63027e-06	0	0	0	0	0
Unigene0050242	2.19602	5.62084	1.3559	1.26023e-06	1.91078e-05	ORF49g [Pinus koraiensis]	0	GO:0009536//plastid	0	0
Unigene0049381	4.93846	12.6467	1.35662	4.00226e-05	0.000446282	0	0	0	0	0
Unigene0014157	2.24436	5.74747	1.35662	6.16364e-09	1.29075e-07	PREDICTED: probable serine/threonine0protein kinase kinX0like [Cicer arietinum]	0	0	GO:0005488//binding;GO:0001071//nucleic acid binding transcription factor activity	GO:0006464//protein modification process;GO:0006351//transcription, DNA0dependent
Unigene0013082	2.98654	7.65293	1.35754	9.28638e-10	2.1377e-08	PREDICTED: growth0regulating factor 50like isoform X1 [Cicer arietinum]	0	GO:0043231//intracellular membrane0bounded organelle	GO:0032550;GO:0016817//hydrolase activity, acting on acid anhydrides	GO:0006351//transcription, DNA0dependent
Unigene0011720	7.31343	18.7439	1.3578	0	0	hypothetical protein MtrDRAFT_AC151598g7v2 [Medicago truncatula]	0	0	0	0
Unigene0009938	0.632657	1.62201	1.35829	5.7886e-06	7.76941e-05	Os09g0463300 [Oryza sativa Japonica Group]	0	0	0	0
Unigene0035940	4.00646	10.2718	1.35829	2.77852e-08	5.3603e-07	0	0	0	0	0
Unigene0037954	4.38658	11.2463	1.35829	2.77852e-08	5.35883e-07	Subtilisin0like protease [Medicago truncatula]	0	GO:0009986//cell surface;GO:0030312//external encapsulating structure	GO:0004175//endopeptidase activity;GO:0005515//protein binding	GO:0009886//post0embryonic morphogenesis;GO:0019538//protein metabolic process;GO:0008283//cell proliferation;GO:0044092//negative regulation of molecular function
Unigene0003311	4.54416	11.6597	1.35945	8.48898e-07	1.32438e-05	PREDICTED: mitochondrial inner membrane protease ATP230like [Cicer arietinum]	0	GO:0009536//plastid	GO:0004175//endopeptidase activity	GO:0019538//protein metabolic process
Unigene0007018	2.833	7.28157	1.36192	4.2565e-10	1.01797e-08	Ethylene0responsive transcription factor [Medicago truncatula]	0	GO:0043231//intracellular membrane0bounded organelle	GO:0003676//nucleic acid binding;GO:0001071//nucleic acid binding transcription factor activity	GO:0006351//transcription, DNA0dependent
Unigene0011722	2.67019	6.86738	1.36282	5.71966e-07	9.1495e-06	hypothetical protein MtrDRAFT_AC151598g7v2 [Medicago truncatula]	0	0	0	0
Unigene0002678	1.20875	3.11565	1.36602	3.85472e-07	6.32512e-06	Leucine0rich repeat0containing protein [Medicago truncatula]	0	0	0	0
Unigene0009570	0.677943	1.74746	1.36602	2.61702e-06	3.73132e-05	PREDICTED: glucan endo01,30beta0glucosidase 140like isoform X1 [Cicer arietinum]	0	0	0	0
Unigene0039577	1.14465	2.95043	1.36602	1.79847e-05	0.000218263	reverse transcriptase family member [Glycine max]	0	GO:0032991//macromolecular complex;GO:0031967;GO:0043232;GO:0044428//nuclear part;GO:0044444//cytoplasmic part;GO:0016020//membrane	GO:0016773//phosphotransferase activity, alcohol group as acceptor;GO:0017111//nucleoside0triphosphatase activity;GO:0032550;GO:0003676//nucleic acid binding;GO:0034061;GO:0016301//kinase activity	GO:0010467//gene expression;GO:0044710;GO:0006974//response to DNA damage stimulus;GO:0006796//phosphate0containing compound metabolic process;GO:0046907//intracellular transport;GO:0071702;GO:0050794//regulation of cellular process;GO:0006260//DNA replication;GO:0006464//protein modification process;GO:0044765;GO:0044767;GO:0051276//chromosome organization
Unigene0087055	1.14433	2.9496	1.36602	2.61702e-06	3.73208e-05	0	0	0	0	0
Unigene0039140	10.0933	26.0593	1.36841	5.79724e-09	1.22059e-07	0	0	0	0	0
Unigene0021173	1.72901	4.46762	1.36956	1.36131e-11	3.88584e-10	cytokinin oxidase/dehydrogenase 1 [Pisum sativum]	ko00908//Zeatin biosynthesis	0	GO:0016645//oxidoreductase activity, acting on the CH0NH group of donors;GO:0016616//oxidoreductase activity, acting on the CH0OH group of donors, NAD or NADP as acceptor;GO:0000166//nucleotide binding	GO:0009690//cytokinin metabolic process;GO:0044710
Unigene0005684	1.23477	3.19206	1.37025	5.91024e-10	1.39302e-08	PREDICTED: uncharacterized LOC101211282 [Cucumis sativus]	0	0	0	0
Unigene0085247	2.08482	5.38957	1.37025	1.20653e-05	0.00015198	0	0	0	0	0
Unigene0058801	1.01088	2.61512	1.37126	8.40158e-05	0.000867643	0	0	0	0	0
Unigene0047065	8.94365	23.1483	1.37197	1.75202e-07	3.03105e-06	phosphoenolpyruvate carboxylase [Malus domestica]	ko00680//Methane metabolism;ko00620//Pyruvate metabolism;ko00710//Carbon fixation in photosynthetic organisms;ko00720//Carbon fixation pathways in prokaryotes	0	0	0
Unigene0035094	4.22885	10.9622	1.3742	8.09794e-06	0.000105791	0	0	0	0	0
Unigene0004274	0.825146	2.13978	1.37474	1.18156e-07	2.09431e-06	PREDICTED: probable polygalacturonase0like isoform X1 [Cicer arietinum]	0	GO:0043231//intracellular membrane0bounded organelle	GO:0004553//hydrolase activity, hydrolyzing O0glycosyl compounds	GO:0044238//primary metabolic process
Unigene0082808	4.63063	12.0123	1.37523	2.77446e-11	7.59766e-10	Cysteine0rich receptor0like protein kinase [Medicago truncatula]	0	0	0	0
Unigene0021549	1.03108	2.6763	1.37608	5.61786e-05	0.000606263	PREDICTED: activating signal cointegrator 1 complex subunit 2 homolog [Cicer arietinum]	0	GO:0043231//intracellular membrane0bounded organelle	0	GO:0009943//adaxial/abaxial axis specification;GO:0009799//specification of symmetry;GO:0003006//developmental process involved in reproduction;GO:0009933//meristem structural organization;GO:0010073//meristem maintenance
Unigene0022013	1.18089	3.06514	1.37608	5.61786e-05	0.00060617	Gag0pro0like protein [Theobroma cacao]	0	0	0	0
Unigene0002868	2.4706	6.41546	1.37669	0	0	Aspartic proteinase nepenthesin02 [Medicago truncatula]	0	GO:0005576//extracellular region	GO:0004175//endopeptidase activity	GO:0019538//protein metabolic process
Unigene0003300	0.587184	1.52548	1.37738	7.97006e-08	1.45012e-06	PREDICTED: geminivirus Rep0interacting motor protein0like [Cicer arietinum]	0	GO:0005875//microtubule associated complex	GO:0032550;GO:0003774//motor activity;GO:0015631//tubulin binding	GO:0007017//microtubule0based process;GO:0016458//gene silencing;GO:0048446//petal morphogenesis;GO:0006305;GO:0048447;GO:0034968//histone lysine methylation;GO:1902410
Unigene0002799	1.32491	3.4433	1.3779	1.23875e-10	3.17851e-09	PREDICTED: proline0rich receptor0like protein kinase PERK80like isoform X1 [Cicer arietinum]	0	0	GO:0004672//protein kinase activity;GO:0032550	GO:0050896//response to stimulus;GO:0006796//phosphate0containing compound metabolic process;GO:0006464//protein modification process
Unigene0036019	2.833	7.36494	1.37834	8.05032e-09	1.66298e-07	0	0	0	0	0
Unigene0049399	2.5497	6.63847	1.38052	3.75906e-05	0.000422391	0	0	0	0	0
Unigene0017006	0.550652	1.43509	1.38193	3.6168e-07	5.96125e-06	Poly(A) polymerase [Medicago truncatula]	ko03015//mRNA surveillance pathway	0	0	0
Unigene0007994	1.95059	5.09312	1.38464	2.53818e-10	6.25165e-09	putative transmembrane protein [Pisum sativum]	0	GO:0031224//intrinsic to membrane	0	0
Unigene0050622	3.71107	9.68983	1.38464	2.5169e-05	0.000293893	0	0	0	0	0
Unigene0008037	0.963606	2.51991	1.38686	1.65319e-08	3.2815e-07	CNGC50like protein [Medicago truncatula]	ko04626//Plant0pathogen interaction	GO:0031224//intrinsic to membrane	GO:0005488//binding;GO:0005267//potassium channel activity	GO:0044763;GO:0030001//metal ion transport
Unigene0045457	3.89647	10.2077	1.38942	2.84218e-14	1.40107e-12	PREDICTED: zinc finger protein 40like [Cicer arietinum]	0	0	GO:0043169//cation binding	0
Unigene0031142	2.0207	5.29463	1.38967	1.10677e-07	1.97223e-06	PREDICTED: leucine0rich repeat receptor0like serine/threonine0protein kinase BAM10like [Cicer arietinum]	0	GO:0031224//intrinsic to membrane;GO:0043231//intracellular membrane0bounded organelle	GO:0032550;GO:0016628//oxidoreductase activity, acting on the CH0CH group of donors, NAD or NADP as acceptor;GO:0004702//receptor signaling protein serine/threonine kinase activity	GO:0044710;GO:0032147//activation of protein kinase activity
Unigene0039120	6.2617	16.4387	1.39247	2.3248e-13	1.00649e-11	0	0	0	0	0
Unigene0037336	21.4049	56.3759	1.39714	5.66214e-14	2.72409e-12	0	0	0	0	0
Unigene0047982	4.02916	10.6215	1.39844	5.08668e-06	6.88136e-05	PREDICTED: microtubule0associated protein SPIRAL20like [Glycine max]	0	0	0	0
Unigene0007060	0.600703	1.58355	1.39844	7.8646e-05	0.000818341	Glutamyl0tRNA(Gln) amidotransferase subunit A [Medicago truncatula]	0	0	0	0
Unigene0048047	7.11792	18.7703	1.39892	0	0	PREDICTED: epidermal growth factor receptor substrate 15 homolog [Cicer arietinum]	0	0	0	0
Unigene0043007	68.0683	179.601	1.39974	3.86358e-14	1.89259e-12	0	0	0	0	0
Unigene0049823	4.96023	13.0946	1.40049	8.65974e-14	4.06028e-12	Ripening0related protein [Medicago truncatula]	0	0	0	0
Unigene0039679	0.716441	1.89173	1.40079	2.2774e-07	3.87396e-06	Ubiquitin0like0specific protease [Medicago truncatula]	0	0	GO:0008233//peptidase activity	0
Unigene0030570	8.14335	21.519	1.40192	2.4003e-13	1.03661e-11	0	ko03040//Spliceosome	0	0	0
Unigene0012049	0.471381	1.24596	1.40229	5.25408e-05	0.000571495	PREDICTED: psbB mRNA maturation factor Mbb1, chloroplastic0like [Cicer arietinum]	0	GO:0031090//organelle membrane;GO:0009526//plastid envelope	GO:0003723//RNA binding	GO:0019684//photosynthesis, light reaction;GO:0006351//transcription, DNA0dependent;GO:0006412//translation;GO:0060701;GO:0009668;GO:0048869;GO:0009658//chloroplast organization;GO:0009887//organ morphogenesis;GO:0006470//protein dephosphorylation;GO:0042254//ribosome biogenesis
Unigene0020885	0.716309	1.89335	1.40229	5.25408e-05	0.000571318	PREDICTED: probable sodium/metabolite cotransporter BASS4, chloroplastic0like [Cicer arietinum]	0	0	0	0
Unigene0053872	1.18909	3.143	1.40229	5.25408e-05	0.000571407	0	0	0	0	0
Unigene0040957	6.46629	17.1025	1.4032	0	0	0	0	0	0	0
Unigene0013996	3.17798	8.40709	1.4035	1.57896e-12	5.49451e-11	PREDICTED: translationally0controlled tumor protein homolog isoform 1 [Vitis vinifera]	0	GO:0044424//intracellular part	0	0
Unigene0025184	1.81028	4.79093	1.40409	7.03786e-09	1.4655e-07	0	0	0	0	0
Unigene0021882	2.84848	7.54536	1.4054	1.53921e-11	4.3599e-10	Os08g0521800 [Oryza sativa Japonica Group]	0	GO:0043231//intracellular membrane0bounded organelle	0	0
Unigene0084830	0.53063	1.406	1.40582	3.51272e-05	0.000397067	PREDICTED: asparagine synthetase domain0containing protein 10like [Cicer arietinum]	0	0	0	0
Unigene0008167	0.822011	2.17934	1.40666	1.54086e-06	2.2931e-05	PREDICTED: abhydrolase domain0containing protein FAM108C10like [Cicer arietinum]	0	0	0	GO:0010087//phloem or xylem histogenesis;GO:0044260
Unigene0008941	0.485162	1.28628	1.40666	1.54086e-06	2.29358e-05	Nucleolar protein gar20related isoform 2 [Theobroma cacao]	0	0	0	0
Unigene0030153	1.62964	4.32782	1.40909	2.35014e-05	0.00027617	0	0	0	0	0
Unigene0033156	1.08354	2.87755	1.40909	1.03567e-06	1.59096e-05	0	0	0	0	0
Unigene0037322	7.85581	20.8749	1.40994	0	0	PREDICTED: zinc finger HIT domain0containing protein 30like [Cicer arietinum]	0	0	0	GO:0003006//developmental process involved in reproduction
Unigene0044153	28.1093	74.6957	1.40998	4.66294e-15	2.40526e-13	PsAD1 [Pisum sativum]	0	0	0	0
Unigene0038188	3.59498	9.55939	1.41093	3.16484e-08	6.06218e-07	PREDICTED: UDP0glycosyltransferase 85A70like isoform X2 [Cicer arietinum]	0	0	GO:0016757//transferase activity, transferring glycosyl groups	0
Unigene0052021	1.70268	4.52899	1.41138	6.96372e-07	1.10014e-05	0	0	0	0	0
Unigene0033140	3.48677	9.27926	1.41212	1.57336e-05	0.000193592	hypothetical protein MTR_6g043630 [Medicago truncatula]	0	0	0	0
Unigene0087135	1.81544	4.83332	1.4127	0	0	Phosphoenolpyruvate carboxykinase [Medicago truncatula]	ko00010//Glycolysis / Gluconeogenesis;ko00620//Pyruvate metabolism;ko00710//Carbon fixation in photosynthetic organisms;ko00020//Citrate cycle (TCA cycle)	GO:0031981//nuclear lumen;GO:0044444//cytoplasmic part	GO:0016772//transferase activity, transferring phosphorus0containing groups;GO:0032550;GO:0004611//phosphoenolpyruvate carboxykinase activity;GO:0000166//nucleotide binding	GO:0010038//response to metal ion;GO:0009267//cellular response to starvation;GO:0006796//phosphate0containing compound metabolic process;GO:0006006//glucose metabolic process;GO:0050832//defense response to fungus
Unigene0042785	16.8631	45.0151	1.41654	0	0	PREDICTED: ribonuclease HI0like [Cicer arietinum]	0	0	0	0
Unigene0002931	2.87146	7.67058	1.41755	6.51368e-12	1.95659e-10	PREDICTED: probable DNA double0strand break repair Rad50 ATPase0like [Cicer arietinum]	0	0	0	0
Unigene0047576	4.8161	12.8786	1.41904	4.42266e-09	9.4251e-08	PREDICTED: CLAVATA3/ESR (CLE)0related protein 120like [Cicer arietinum]	0	0	0	0
Unigene0012893	1.98751	5.31829	1.42	4.73738e-06	6.44993e-05	0	0	0	0	0
Unigene0082378	2.26297	6.07405	1.42444	2.1336e-06	3.08731e-05	0	0	0	0	0
Unigene0010029	2.57288	6.91553	1.42646	9.0039e-12	2.6434e-10	PREDICTED: unconventional prefoldin RPB5 interactor 10like [Cicer arietinum]	0	GO:0043231//intracellular membrane0bounded organelle	0	0
Unigene0049851	2.96177	7.96616	1.42742	7.31874e-05	0.000767356	0	0	0	0	0
Unigene0054024	1.03018	2.77084	1.42742	7.31874e-05	0.000767471	0	0	0	0	0
Unigene0011343	1.05731	2.8452	1.42813	8.4377e-15	4.29544e-13	PREDICTED: RNA0binding protein 390like [Cicer arietinum]	0	0	0	0
Unigene0031332	1.50259	4.0491	1.43015	4.88596e-05	0.000535194	0	0	0	0	0
Unigene0018607	1.68882	4.55888	1.43266	3.2645e-05	0.000371165	0	0	0	0	0
Unigene0028106	2.24396	6.05744	1.43266	3.2645e-05	0.000371226	0	0	0	0	0
Unigene0058222	1.30657	3.53267	1.43497	2.18276e-05	0.000259549	RNA0directed DNA polymerase (Reverse transcriptase) [Medicago truncatula]	0	0	GO:0004518//nuclease activity	0
Unigene0043988	1.92513	5.20825	1.43584	1.21683e-11	3.4962e-10	Rop0interacting receptor0like cytoplasmic kinase 1 [Medicago truncatula]	0	GO:0043231//intracellular membrane0bounded organelle	GO:0004672//protein kinase activity;GO:0032550	GO:0006796//phosphate0containing compound metabolic process;GO:0006464//protein modification process
Unigene0011592	2.4818	6.71528	1.43606	1.26222e-09	2.87069e-08	0	0	0	0	0
Unigene0037340	112.977	305.852	1.43681	1.16462e-12	4.17293e-11	0	0	0	0	0
Unigene0024423	3.65836	9.91066	1.43778	8.9184e-08	1.61178e-06	0	0	0	0	0
Unigene0019042	1.1921	3.23236	1.43909	6.00576e-08	1.10797e-06	0	0	0	0	0
Unigene0034587	1.81053	4.90925	1.43909	9.77848e-06	0.000125384	0	0	0	0	0
Unigene0038931	3.68235	9.98467	1.43909	6.00576e-08	1.10768e-06	PREDICTED: anaphase0promoting complex subunit 10like [Cicer arietinum]	ko04120//Ubiquitin mediated proteolysis;ko04110//Cell cycle;ko04114//Oocyte meiosis;ko04111//Cell cycle 0 yeast;ko04113//Meiosis 0 yeast;ko04914//Progesterone0mediated oocyte maturation	0	0	0
Unigene0042854	17.4137	47.2433	1.43989	0	0	0	0	0	0	0
Unigene0003220	4.66091	12.6462	1.44002	2.49356e-13	1.07292e-11	0	0	0	0	0
Unigene0056757	1.68506	4.5803	1.44264	4.39118e-06	6.02188e-05	PREDICTED: AP20like ethylene0responsive transcription factor PLT20like [Glycine max]	0	0	0	0
Unigene0035756	5.94571	16.1795	1.44425	7.77156e-15	3.9592e-13	0	0	0	0	0
Unigene0047278	6.59754	17.9884	1.44707	0	0	Protein argonaute [Medicago truncatula]	0	0	0	0
Unigene0084650	3.36213	9.16927	1.44743	9.10382e-14	4.25426e-12	Receptor0like kinase [Medicago truncatula]	0	0	0	0
Unigene0003528	2.62547	7.16547	1.44848	8.90908e-07	1.38437e-05	PREDICTED: beta01,40mannosyl0glycoprotein 40beta0N0acetylglucosaminyltransferase0like isoform X2 [Cicer arietinum]	ko00510//N0Glycan biosynthesis	0	GO:0008375//acetylglucosaminyltransferase activity	GO:0006486//protein glycosylation
Unigene0014303	2.90784	7.9361	1.44848	8.90908e-07	1.38406e-05	0	0	0	0	0
Unigene0015577	0.797285	2.17596	1.44848	8.90908e-07	1.38467e-05	Os09g0413600 [Oryza sativa Japonica Group]	0	GO:0043231//intracellular membrane0bounded organelle;GO:0030529//ribonucleoprotein complex	GO:0005198//structural molecule activity	GO:0010467//gene expression
Unigene0006222	2.5624	6.99821	1.44949	0	0	PREDICTED: dentin sialophosphoprotein0like [Cicer arietinum]	0	0	0	0
Unigene0045696	21.4349	58.6144	1.45129	0	0	hypothetical protein MTR_8g086770 [Medicago truncatula]	0	0	0	0
Unigene0036154	3.59691	9.86871	1.4561	0	0	0	0	0	0	0
Unigene0008475	1.29677	3.56354	1.45839	6.76716e-05	0.000716062	0	0	0	0	0
Unigene0018785	1.31907	3.62481	1.45839	6.76716e-05	0.000715845	Homeodomain0related [Medicago truncatula]	0	0	0	0
Unigene0026235	4.84086	13.3027	1.45839	6.76716e-05	0.00071617	0	0	0	0	0
Unigene0030321	1.37358	3.7746	1.45839	6.76716e-05	0.000715521	Dimethylaniline monooxygenase [Medicago truncatula]	ko00380//Tryptophan metabolism	0	0	0
Unigene0031697	1.95533	5.37325	1.45839	6.76716e-05	0.000715629	hypothetical protein MTR_4g065480 [Medicago truncatula]	0	0	0	0
Unigene0050733	1.47517	4.05379	1.45839	6.76716e-05	0.000715737	0	0	0	0	0
Unigene0051280	2.22097	6.10325	1.45839	6.76716e-05	0.000715953	Auxin0induced SAUR0like protein [Medicago truncatula]	0	0	0	GO:0009755//hormone0mediated signaling pathway
Unigene0045069	17.8859	49.216	1.4603	1.48326e-13	6.67314e-12	PREDICTED: uncharacterized protein LOC101498984 isoform X5 [Cicer arietinum]	0	0	0	0
Unigene0048169	1.90521	5.24567	1.46118	3.01576e-05	0.000345577	0	0	0	0	0
Unigene0049863	4.47684	12.3262	1.46118	3.01576e-05	0.000345633	0	0	0	0	0
Unigene0081751	2.13308	5.87309	1.46118	3.01576e-05	0.00034552	0	0	0	0	0
Unigene0036174	3.67253	10.1146	1.4616	1.95177e-13	8.60955e-12	PREDICTED: uncharacterized protein LOC101508009 isoform X2 [Cicer arietinum]	0	0	0	0
Unigene0039862	2.65434	7.32026	1.46354	1.34818e-05	0.00016813	Protein kinase0like protein [Medicago truncatula]	0	0	GO:0046906//tetrapyrrole binding;GO:0046914//transition metal ion binding;GO:0016491//oxidoreductase activity;GO:0004672//protein kinase activity;GO:0032550	GO:0006796//phosphate0containing compound metabolic process;GO:0006464//protein modification process;GO:0044710
Unigene0054585	1.72011	4.74723	1.46459	3.31142e-10	8.0208e-09	PREDICTED: long0chain0fatty0acid00AMP ligase FadD260like [Cicer arietinum]	0	0	0	0
Unigene0005871	0.989232	2.73196	1.46556	6.04326e-06	8.07409e-05	0	0	0	0	0
Unigene0015718	0.540769	1.49344	1.46556	6.04326e-06	8.07563e-05	PREDICTED: phosphatidylinositol:ceramide inositolphosphotransferase 20like isoform X1 [Cicer arietinum]	0	0	0	0
Unigene0049364	4.45328	12.2986	1.46556	6.04326e-06	8.07255e-05	0	0	0	0	0
Unigene0027908	4.70533	13.0105	1.46731	2.71524e-06	3.86428e-05	PREDICTED: glyoxylate/hydroxypyruvate reductase HPR30like [Cicer arietinum]	0	0	0	0
Unigene0018764	1.09012	3.01589	1.46809	1.82144e-06	2.67037e-05	retrotransposon polyprotein [Rosa rugosa]	0	0	0	0
Unigene0009976	5.51287	15.2557	1.46847	9.73554e-12	2.83915e-10	pathogenesis0related protein 10like protein [Volvox carteri f. nagariensis]	0	0	0	0
Unigene0052906	1.48616	4.11367	1.46883	1.22245e-06	1.85751e-05	PREDICTED: uncharacterized LOC101221076 isoform 2 [Cucumis sativus]	0	0	0	0
Unigene0041106	7.08922	19.6322	1.46953	8.2081e-07	1.28399e-05	NBS0LRR resistance0like protein 4G [Medicago truncatula]	0	0	GO:0032550	GO:0006950//response to stress;GO:0007154//cell communication
Unigene0049819	4.66231	12.9279	1.47138	2.49082e-07	4.20635e-06	0	0	0	0	0
Unigene0026875	4.7511	13.1791	1.47192	1.67508e-07	2.90439e-06	0	0	0	0	0
Unigene0012364	1.46327	4.06783	1.47507	1.05106e-08	2.13037e-07	Momilactone A synthase [Medicago truncatula]	0	0	GO:0016628//oxidoreductase activity, acting on the CH0CH group of donors, NAD or NADP as acceptor	GO:0044710
Unigene0025509	2.59842	7.22536	1.47543	7.08466e-09	1.47437e-07	0	0	0	0	0
Unigene0050389	3.66864	10.2013	1.47543	7.08466e-09	1.47481e-07	0	0	0	0	0
Unigene0010874	7.65487	21.2994	1.47637	4.08562e-13	1.67169e-11	BZIP transcription factor bZIP82 [Medicago truncatula]	0	0	0	0
Unigene0004483	2.01916	5.61976	1.47676	1.46577e-09	3.30571e-08	0	0	0	0	0
Unigene0029354	1.89536	5.28443	1.47927	2.89986e-11	7.9163e-10	0	0	0	0	0
Unigene0027575	11.5997	32.3665	1.48041	2.75158e-12	9.10465e-11	0	0	0	0	0
Unigene0003301	0.983882	2.75032	1.48304	0	0	PREDICTED: geminivirus Rep0interacting motor protein0like [Cicer arietinum]	0	GO:0005875//microtubule associated complex	GO:0032550;GO:0003774//motor activity;GO:0015631//tubulin binding	GO:0007017//microtubule0based process;GO:0016458//gene silencing;GO:0048446//petal morphogenesis;GO:0006305;GO:0048447;GO:0034968//histone lysine methylation;GO:1902410
Unigene0038670	8.20525	22.9605	1.48453	1.58762e-13	7.10614e-12	PREDICTED: ABC transporter G family member 220like isoform X3 [Cicer arietinum]	0	0	GO:0017111//nucleoside0triphosphatase activity	0
Unigene0044501	9.24776	25.9054	1.48608	0	0	Serine/threonine0protein kinase WNK0related isoform 1 [Theobroma cacao]	0	0	0	0
Unigene0021739	4.08672	11.451	1.48646	1.77636e-14	8.91346e-13	expressed protein [Oryza sativa Japonica Group]	0	0	0	0
Unigene0004729	0.942371	2.64987	1.49155	1.67036e-06	2.4659e-05	0	0	0	0	0
Unigene0006904	0.896902	2.52201	1.49155	8.2786e-06	0.00010783	CLEC16A0like protein [Medicago truncatula]	0	0	0	0
Unigene0010881	0.785127	2.20771	1.49155	1.67036e-06	2.46694e-05	0	0	0	0	0
Unigene0014089	0.96267	2.70695	1.49155	2.28334e-07	3.88312e-06	PREDICTED: calcium uptake protein 1, mitochondrial0like isoform X1 [Cicer arietinum]	0	GO:0043231//intracellular membrane0bounded organelle	GO:0046872//metal ion binding	0
Unigene0030250	1.81053	5.09107	1.49155	3.71452e-06	5.16164e-05	PREDICTED: UDP0glucuronic acid/UDP0N0acetylgalactosamine transporter0like [Glycine max]	0	0	0	0
Unigene0034430	5.56298	15.6426	1.49155	5.54372e-06	7.46075e-05	0	0	0	0	0
Unigene0035844	2.1308	5.99164	1.49155	4.14532e-05	0.00046106	reverse transcriptase family member [Glycine max]	0	0	GO:0003676//nucleic acid binding;GO:0034061	GO:0006260//DNA replication
Unigene0037976	1.64829	4.63486	1.49155	1.84976e-05	0.000223674	0	0	0	0	0
Unigene0045954	1.1866	3.33661	1.49155	1.67036e-06	2.46642e-05	PREDICTED: 50methyltetrahydropteroyltriglutamate00homocysteine methyltransferase0like isoform X1 [Cicer arietinum]	ko00270//Cysteine and methionine metabolism;ko00450//Selenocompound metabolism	0	0	0
Unigene0047729	7.04747	19.8169	1.49155	6.49164e-09	1.35782e-07	0	0	0	0	0
Unigene0053048	1.12384	3.16013	1.49155	6.2134e-05	0.00066257	0	0	0	0	0
Unigene0084013	0.853314	2.39945	1.49155	1.23705e-05	0.000155462	0	0	0	0	0
Unigene0086057	0.781999	2.19892	1.49155	3.71452e-06	5.16062e-05	0	0	0	0	0
Unigene0038964	4.01308	11.3769	1.50333	5.1521e-12	1.58428e-10	0	0	0	0	0
Unigene0041072	1.75841	4.99945	1.50749	2.69434e-09	5.89063e-08	0	0	0	0	0
Unigene0043804	42.3701	120.827	1.51183	0	0	PREDICTED: developmental protein SEPALLATA 10like isoform X2 [Cicer arietinum]	0	GO:0043231//intracellular membrane0bounded organelle	GO:0003676//nucleic acid binding;GO:0001071//nucleic acid binding transcription factor activity;GO:0005515//protein binding	GO:0006351//transcription, DNA0dependent
Unigene0021488	1.91448	5.46251	1.51261	2.08336e-07	3.56292e-06	PREDICTED: ABC transporter C family member 100like isoform X2 [Cicer arietinum]	0	0	GO:0017111//nucleoside0triphosphatase activity;GO:0097159;GO:0016491//oxidoreductase activity;GO:1901363;GO:0036094	GO:0009987//cellular process;GO:0044710;GO:0051234//establishment of localization
Unigene0050981	2.71808	7.75542	1.51261	2.08336e-07	3.56379e-06	Leucine0rich repeat0containing protein [Medicago truncatula]	0	GO:0043231//intracellular membrane0bounded organelle	0	0
Unigene0020766	5.666	16.1737	1.51325	3.09906e-07	5.15521e-06	60phosphofructo020kinase/fructose02,60biphosphatase [Medicago truncatula]	ko00051//Fructose and mannose metabolism	0	0	0
Unigene0033844	16.2272	46.3901	1.5154	0	0	0	0	0	0	0
Unigene0047184	1.64232	4.69503	1.5154	1.02249e-06	1.57278e-05	0	0	0	0	0
Unigene0032741	3.70285	10.5916	1.51622	1.52352e-06	2.2697e-05	PHD finger protein 21A [Medicago truncatula]	0	0	0	0
Unigene0054093	0.922969	2.64337	1.51803	3.3874e-06	4.73149e-05	0	0	0	0	0
Unigene0037633	1.78295	5.10991	1.51903	5.05504e-06	6.84517e-05	0	0	0	0	0
Unigene0044962	1.29075	3.70064	1.51957	1.56462e-10	3.95811e-09	PREDICTED: O0acyltransferase WSD10like [Glycine max]	0	0	0	0
Unigene0047144	2.92062	8.37679	1.52012	7.54808e-06	9.88845e-05	PREDICTED: DNA topoisomerase 20like [Cicer arietinum]	0	0	0	0
Unigene0024486	2.20664	6.33415	1.5213	5.082e-10	1.20552e-08	0	0	0	0	0
Unigene0047106	3.96405	11.3889	1.52258	1.68616e-05	0.000206384	0	0	0	0	0
Unigene0059164	1.14314	3.28429	1.52258	1.68616e-05	0.000206348	0	0	0	0	0
Unigene0027355	2.91584	8.38543	1.52397	2.52286e-05	0.000294343	0	0	0	0	0
Unigene0030908	3.73392	10.7436	1.52472	3.6335e-09	7.81945e-08	0	0	0	0	0
Unigene0083526	0.996742	2.86949	1.5255	3.7777e-05	0.000424213	PREDICTED: myosin0H heavy chain0like [Cicer arietinum]	0	0	0	0
Unigene0051175	2.26102	6.50917	1.5255	8.89288e-13	3.28207e-11	RNA0binding region RNP01 (RNA recognition motif) [Medicago truncatula]	0	0	GO:0097159	0
Unigene0081605	0.268592	0.773239	1.5255	3.7777e-05	0.000424281	GYF domain0containing protein [Arabidopsis thaliana]	0	0	0	0
Unigene0048263	6.9135	19.9105	1.52604	1.22569e-13	5.59336e-12	0	0	0	0	0
Unigene0040098	0.663661	1.91281	1.52718	5.6615e-05	0.000610409	reverse transcriptase family member [Glycine max]	0	GO:0043231//intracellular membrane0bounded organelle;GO:0070013;GO:0043234//protein complex	GO:0046914//transition metal ion binding;GO:0017111//nucleoside0triphosphatase activity;GO:0003676//nucleic acid binding;GO:0034061;GO:0008233//peptidase activity	GO:1901575;GO:0006260//DNA replication;GO:0019538//protein metabolic process
Unigene0007592	0.291647	0.841667	1.52903	8.49256e-05	0.000876006	Acyl0CoA0binding domain0containing protein [Medicago truncatula]	0	GO:0044444//cytoplasmic part;GO:0043231//intracellular membrane0bounded organelle	0	GO:0010876
Unigene0034434	1.92025	5.54168	1.52903	2.6126e-08	5.06112e-07	0	0	0	0	0
Unigene0055502	0.589885	1.70236	1.52903	8.49256e-05	0.000876135	PREDICTED: RNA polymerase0associated protein RTF1 homolog [Cicer arietinum]	0	0	0	0
Unigene0044365	21.5649	62.2906	1.53033	0	0	PREDICTED: cytokinin riboside 5'0monophosphate phosphoribohydrolase LOG30like [Cicer arietinum]	0	0	0	0
Unigene0048307	6.14807	17.7593	1.53037	0	0	PREDICTED: ABC transporter G family member 360like [Cicer arietinum]	0	GO:0009526//plastid envelope;GO:0031090//organelle membrane;GO:0005911//cell0cell junction	GO:0046915//transition metal ion transmembrane transporter activity;GO:0015405;GO:0017111//nucleoside0triphosphatase activity;GO:0031559//oxidosqualene cyclase activity	GO:0052482;GO:0016104//triterpenoid biosynthetic process;GO:0043405//regulation of MAP kinase activity;GO:0010243//response to organic nitrogen;GO:0050832//defense response to fungus;GO:0070838//divalent metal ion transport;GO:0009626//plant0type hypersensitive response;GO:0071365//cellular response to auxin stimulus;GO:0006873//cellular ion homeostasis;GO:0042743//hydrogen peroxide metabolic pro…
Unigene0005693	7.63098	22.1014	1.5342	1.41971e-10	3.61633e-09	0	0	0	0	0
Unigene0042212	17.5237	50.7535	1.5342	0	0	hypothetical protein MTR_4g130220 [Medicago truncatula]	0	0	0	0
Unigene0002787	2.76493	8.01034	1.53462	0	0	0	0	0	0	0
Unigene0051078	4.88932	14.178	1.53595	3.1119e-10	7.57683e-09	0	0	0	0	0
Unigene0049528	2.22925	6.4774	1.53886	6.2292e-07	9.90802e-06	0	0	0	0	0
Unigene0034545	2.13537	6.23191	1.54519	0	0	0	0	0	0	0
Unigene0031004	1.45318	4.24338	1.546	3.07012e-06	4.32105e-05	0	0	0	0	0
Unigene0021464	9.39229	27.4438	1.54693	0	0	0	0	0	0	0
Unigene0010042	0.427093	1.24835	1.54741	1.59262e-08	3.16487e-07	PREDICTED: histone0lysine N0methyltransferase ATX20like isoform X1 [Cicer arietinum]	0	GO:0043231//intracellular membrane0bounded organelle	GO:0046914//transition metal ion binding;GO:0008168//methyltransferase activity	GO:0007165//signal transduction;GO:0032259//methylation
Unigene0037106	1.12087	3.27787	1.54814	4.58006e-06	6.25641e-05	0	0	0	0	0
Unigene0005839	3.65469	10.6905	1.54851	1.46994e-13	6.62597e-12	RopGEF2 [Medicago truncatula]	0	0	0	0
Unigene0009556	21.8797	64.0283	1.54911	4.05676e-13	1.66085e-11	PREDICTED: 30ketoacyl0CoA synthase 210like [Cicer arietinum]	0	0	0	0
Unigene0030396	9.99682	29.2654	1.54966	0	0	0	0	0	0	0
Unigene0005889	7.61074	22.2875	1.55013	2.77556e-14	1.37403e-12	Ovate family protein 13 [Theobroma cacao]	0	0	0	0
Unigene0005771	1.29818	3.80246	1.55045	6.83644e-06	9.04924e-05	0	0	0	0	0
Unigene0028329	3.98679	11.6979	1.55295	4.16292e-10	9.98317e-09	PREDICTED: UPF0544 protein C5orf45 homolog isoform X2 [Cicer arietinum]	0	0	0	0
Unigene0049950	2.79503	8.20109	1.55295	4.16292e-10	9.97975e-09	0	0	0	0	0
Unigene0037481	3.99262	11.7222	1.55384	7.73784e-08	1.4097e-06	0	0	0	0	0
Unigene0036170	10.496	30.8199	1.55402	2.3248e-13	1.00711e-11	0	0	0	0	0
Unigene0005787	0.718974	2.11359	1.55568	1.52597e-05	0.000188324	0	0	0	0	0
Unigene0003097	2.94454	8.65614	1.55568	1.14963e-07	2.04184e-06	PREDICTED: carboxylesterase 10like [Cicer arietinum]	0	0	GO:0003824//catalytic activity	0
Unigene0015998	0.426282	1.25575	1.55867	2.28214e-05	0.000269173	PREDICTED: protein MEI20like 40like isoform X2 [Cicer arietinum]	0	0	GO:0036094;GO:0097159	0
Unigene0039330	1.23462	3.63695	1.55867	2.28214e-05	0.000269127	PREDICTED: sacsin0like [Glycine max]	0	0	GO:0016301//kinase activity	0
Unigene0031292	0.593077	1.7471	1.55867	2.28214e-05	0.000269082	PREDICTED: TATA0binding protein0associated factor 2N0like isoform X1 [Cicer arietinum]	0	0	GO:0046914//transition metal ion binding;GO:0036094;GO:1901363;GO:0097159	0
Unigene0049661	2.53499	7.46761	1.55867	2.00348e-09	4.44964e-08	Auxin response factor [Medicago truncatula]	0	GO:0043231//intracellular membrane0bounded organelle	GO:0003723//RNA binding;GO:0001071//nucleic acid binding transcription factor activity	GO:0044763;GO:0009725//response to hormone stimulus;GO:0048364//root development;GO:0006351//transcription, DNA0dependent
Unigene0036178	3.62799	10.6932	1.55946	7.4829e-14	3.54169e-12	PREDICTED: uncharacterized protein LOC101508009 isoform X2 [Cicer arietinum]	0	0	0	0
Unigene0085260	0.148179	0.437501	1.56194	3.41556e-05	0.000387021	Nucleotidyltransferase family protein isoform 2 [Theobroma cacao]	0	0	0	0
Unigene0086078	0.792302	2.34514	1.56555	5.11596e-05	0.000557771	0	0	0	0	0
Unigene0004217	1.31114	3.88433	1.56684	8.36448e-07	1.30641e-05	PREDICTED: uncharacterized LOC101221543 [Cucumis sativus]	0	GO:0044424//intracellular part	GO:0016491//oxidoreductase activity	GO:0006796//phosphate0containing compound metabolic process;GO:0019637//organophosphate metabolic process;GO:0044710;GO:0044238//primary metabolic process
Unigene0009268	0.705887	2.09123	1.56684	8.36448e-07	1.3067e-05	0	0	0	0	0
Unigene0046529	8.27909	24.5411	1.56766	0	0	0	0	0	0	0
Unigene0053331	1.63181	4.84343	1.56956	1.2454e-06	1.88993e-05	0	0	0	0	0
Unigene0082711	0.83136	2.47054	1.57128	5.54572e-10	1.31152e-08	0	0	0	0	0
Unigene0033428	0.815467	2.43284	1.57694	1.80045e-09	4.01655e-08	PREDICTED: probable peptide/nitrate transporter At1g188800like [Cicer arietinum]	0	0	0	0
Unigene0005894	3.37071	10.0649	1.57821	0	0	Fructokinase [Medicago truncatula]	ko00500//Starch and sucrose metabolism;ko00051//Fructose and mannose metabolism;ko00520//Amino sugar and nucleotide sugar metabolism	0	0	0
Unigene0043836	50.1378	149.795	1.57902	4.1167e-13	1.68244e-11	0	0	0	0	0
Unigene0003975	1.68152	5.03667	1.5827	6.14858e-06	8.19136e-05	0	0	0	0	0
Unigene0030133	1.69519	5.07762	1.5827	6.14858e-06	8.19292e-05	0	0	0	0	0
Unigene0039403	3.91469	11.732	1.58348	5.8549e-09	1.23088e-07	0	0	0	0	0
Unigene0039699	0.619592	1.85686	1.58348	5.8549e-09	1.23125e-07	PREDICTED: kinesin0like protein KIF220B0like isoform X3 [Cicer arietinum]	0	0	0	GO:0044763
Unigene0050076	3.67263	11.0066	1.58348	5.8549e-09	1.23162e-07	PREDICTED: HD domain0containing protein 20like isoform X2 [Cicer arietinum]	0	GO:0044444//cytoplasmic part;GO:0043231//intracellular membrane0bounded organelle	GO:0042578//phosphoric ester hydrolase activity;GO:0043169//cation binding	0
Unigene0049669	1.45995	4.39849	1.59109	1.37047e-05	0.000170636	auxin efflux carrier protein [Medicago truncatula]	0	GO:0031224//intrinsic to membrane	0	GO:0044763
Unigene0012590	0.698377	2.10405	1.59109	1.37047e-05	0.000170667	PREDICTED: uncharacterized LOC101216431, partial [Cucumis sativus]	0	GO:0043231//intracellular membrane0bounded organelle;GO:0016020//membrane	0	0
Unigene0003181	0.729354	2.2028	1.59465	7.49802e-07	1.17896e-05	PREDICTED: beta0glucosidase 250like [Glycine max]	0	GO:0005618//cell wall	GO:0015926//glucosidase activity	GO:0044238//primary metabolic process
Unigene0009777	1.81312	5.48072	1.59589	2.0479e-05	0.000245052	0	0	0	0	0
Unigene0019583	1.3551	4.0962	1.59589	2.0479e-05	0.000245136	0	0	0	0	0
Unigene0030127	1.33908	4.0478	1.59589	2.0479e-05	0.000245177	0	0	0	0	0
Unigene0051790	1.55499	4.70045	1.59589	2.0479e-05	0.00024501	0	0	0	0	0
Unigene0034780	2.18448	6.60328	1.59589	2.0479e-05	0.000245094	0	0	0	0	0
Unigene0003454	2.99119	9.05797	1.59847	1.11564e-06	1.70595e-05	PREDICTED: ABC transporter C family member 100like isoform X2 [Cicer arietinum]	0	0	0	0
Unigene0018263	1.56511	4.7395	1.59847	1.11564e-06	1.7067e-05	0	0	0	0	0
Unigene0021889	0.602212	1.82363	1.59847	1.11564e-06	1.70633e-05	PREDICTED: LOW QUALITY PROTEIN: UPF0586 protein C9orf41 homolog [Cicer arietinum]	0	0	0	0
Unigene0041073	3.37738	10.2467	1.60118	3.06216e-05	0.000350492	0	0	0	0	0
Unigene0013514	3.0113	9.13602	1.60118	3.06216e-05	0.000350435	0	0	0	0	0
Unigene0044868	12.1873	36.975	1.60118	5.92192e-13	2.30075e-11	DNA topoisomerase [Medicago truncatula]	0	0	0	0
Unigene0012783	0.863391	2.6301	1.60703	7.74992e-09	1.60376e-07	0	0	0	0	0
Unigene0016349	2.12238	6.46529	1.60703	4.43718e-10	1.05901e-08	0	0	0	0	0
Unigene0016453	0.679072	2.06862	1.60703	2.47278e-06	3.54732e-05	PREDICTED: uncharacterized LOC101220175 [Cucumis sativus]	0	GO:0009536//plastid	0	0
Unigene0057948	0.905806	2.7593	1.60703	2.47278e-06	3.54587e-05	0	0	0	0	0
Unigene0017139	2.15848	6.57524	1.60703	1.37186e-07	2.40664e-06	starch branching enzyme I [Pisum sativum]	ko00500//Starch and sucrose metabolism	0	0	0
Unigene0017984	0.586454	1.78648	1.60703	2.47278e-06	3.5466e-05	PREDICTED: transcription factor MYB1130like [Glycine max]	0	GO:0043231//intracellular membrane0bounded organelle	GO:0003676//nucleic acid binding	0
Unigene0055955	0.743082	2.26361	1.60703	4.58194e-05	0.000504972	PREDICTED: uncharacterized protein LOC101506395 [Cicer arietinum]	ko00230//Purine metabolism	0	0	0
Unigene0083551	1.55115	4.72518	1.60703	4.58194e-05	0.000505052	0	0	0	0	0
Unigene0008802	7.04334	21.4659	1.60771	4.74732e-13	1.90243e-11	MADS0box transcription factor [Medicago truncatula]	0	0	0	0
Unigene0017411	1.91985	5.85596	1.60891	2.2471e-13	9.77684e-12	0	0	0	0	0
Unigene0040486	3.77734	11.5587	1.61354	6.86112e-05	0.000724363	0	0	0	0	0
Unigene0049694	2.7133	8.30276	1.61354	6.86112e-05	0.000724472	PREDICTED: calcium0dependent protein kinase 40like [Cicer arietinum]	ko04626//Plant0pathogen interaction;ko05145//Toxoplasmosis	GO:0016020//membrane;GO:0043231//intracellular membrane0bounded organelle	GO:0032550;GO:0046872//metal ion binding;GO:0004674//protein serine/threonine kinase activity	GO:0006865//amino acid transport;GO:0012501//programmed cell death;GO:0051707//response to other organism;GO:0009664//plant0type cell wall organization;GO:0009755//hormone0mediated signaling pathway;GO:0006468//protein phosphorylation;GO:0000904//cell morphogenesis involved in differentiation;GO:0009628//response to abiotic stimulus;GO:0033554//cellular response to stress;GO:0046907//intracellula…
Unigene0016437	6.14386	18.8117	1.61441	8.281e-11	2.16365e-09	0	0	0	0	0
Unigene0040780	5.93077	18.1658	1.61494	3.02572e-07	5.0452e-06	0	0	0	0	0
Unigene0085282	1.20751	3.70013	1.61554	1.4362e-09	3.2453e-08	PREDICTED: uncharacterized LOC101215677 [Cucumis sativus]	0	0	0	0
Unigene0048942	3.54881	10.8861	1.61708	5.48992e-06	7.39687e-05	0	0	0	0	0
Unigene0020263	0.673665	2.0747	1.6228	8.18554e-06	0.000106756	0	0	0	0	0
Unigene0028313	3.26462	10.0625	1.624	6.68104e-07	1.05858e-05	0	0	0	0	0
Unigene0004150	3.16979	9.80451	1.62906	5.83532e-10	1.37583e-08	BZIP transcription factor bZIP82 [Medicago truncatula]	0	0	0	0
Unigene0049115	5.16899	16.0255	1.63242	8.62716e-10	1.99381e-08	PREDICTED: histone0lysine N0methyltransferase ATX30like isoform X2 [Cicer arietinum]	0	GO:0043231//intracellular membrane0bounded organelle	GO:0046914//transition metal ion binding;GO:0003676//nucleic acid binding;GO:0016279//protein0lysine N0methyltransferase activity	GO:0016571//histone methylation
Unigene0084028	1.96075	6.08104	1.63291	1.02059e-08	2.07161e-07	0	0	0	0	0
Unigene0051415	2.03721	6.32519	1.63451	1.47701e-06	2.20744e-05	0	0	0	0	0
Unigene0032779	0.875904	2.72347	1.6366	1.29563e-12	4.58835e-11	R3H domain0containing protein [Medicago truncatula]	0	0	0	0
Unigene0050422	1.90309	5.91888	1.63698	0	0	0	0	0	0	0
Unigene0034743	1.90266	5.92709	1.63931	1.81277e-12	6.21551e-11	PREDICTED: serine/threonine0protein phosphatase 7 long form homolog [Cicer arietinum]	0	0	0	0
Unigene0001899	0.578228	1.80266	1.64042	2.19714e-06	3.17466e-05	LATHYROIDES [Pisum sativum]	0	0	0	0
Unigene0014857	0.927164	2.89679	1.64356	2.72116e-05	0.000315378	0	0	0	0	0
Unigene0049425	3.17473	9.91896	1.64356	2.72116e-05	0.000315326	0	0	0	0	0
Unigene0049636	1.84594	5.76736	1.64356	2.72116e-05	0.00031543	0	0	0	0	0
Unigene0050240	2.63419	8.24568	1.64628	5.82422e-13	2.26782e-11	0	0	0	0	0
Unigene0011974	0.819406	2.56593	1.64683	3.26944e-06	4.5731e-05	0	0	0	0	0
Unigene0054840	0.993244	3.11029	1.64683	3.26944e-06	4.57402e-05	0	0	0	0	0
Unigene0004407	1.79578	5.63	1.64852	0	0	Pollen Ole e 1 allergen and extensin family protein [Theobroma cacao]	0	0	0	0
Unigene0049032	3.35884	10.5451	1.65054	0	0	Short internode related sequence [Medicago truncatula]	0	0	0	GO:0044763
Unigene0037478	3.07003	9.64826	1.65202	4.0654e-05	0.00045253	0	0	0	0	0
Unigene0051462	0.981626	3.08498	1.65202	4.0654e-05	0.000452602	0	0	0	0	0
Unigene0056812	1.40945	4.43886	1.65505	5.91992e-07	9.43966e-06	0	0	0	0	0
Unigene0042116	11.732	36.988	1.65661	0	0	0	0	0	0	0
Unigene0050442	2.22925	7.02827	1.65661	9.04148e-09	1.85027e-07	0	0	0	0	0
Unigene0007530	1.47109	4.65366	1.66148	6.07692e-05	0.000649896	0	0	0	0	0
Unigene0053779	0.82321	2.60415	1.66148	6.07692e-05	0.000650095	0	0	0	0	0
Unigene0055576	0.852031	2.69532	1.66148	7.2465e-06	9.54513e-05	0	0	0	0	0
Unigene0057710	0.667202	2.11063	1.66148	6.07692e-05	0.000649996	Os05g0235100 [Oryza sativa Japonica Group]	0	0	GO:0046872//metal ion binding	GO:0008152//metabolic process
Unigene0047454	1.02436	3.24047	1.66148	7.2465e-06	9.54693e-05	PREDICTED: importin subunit alpha010like [Glycine max]	0	0	0	0
Unigene0010303	5.03645	15.9829	1.66605	2.47118e-09	5.43326e-08	0	0	0	0	0
Unigene0028878	3.30628	10.4966	1.66664	1.98134e-08	3.88769e-07	0	0	0	0	0
Unigene0020368	1.82727	5.80111	1.66664	1.98134e-08	3.88878e-07	0	0	0	0	0
Unigene0036981	0.417212	1.32454	1.66664	1.98134e-08	3.8866e-07	PREDICTED: condensin complex subunit 10like [Cicer arietinum]	ko04111//Cell cycle 0 yeast	GO:0043231//intracellular membrane0bounded organelle;GO:0000793//condensed chromosome	0	GO:0000070//mitotic sister chromatid segregation;GO:0001708//cell fate specification
Unigene0015380	3.32021	10.5539	1.66843	1.306e-06	1.97334e-05	0	0	0	0	0
Unigene0053964	1.08939	3.46282	1.66843	1.306e-06	1.97291e-05	0	0	0	0	0
Unigene0043833	14.6461	46.5945	1.66965	2.57572e-14	1.27781e-12	PREDICTED: phosphoenolpyruvate carboxylase, housekeeping isozyme0like isoform X1 [Setaria italica]	ko00680//Methane metabolism;ko00620//Pyruvate metabolism;ko00710//Carbon fixation in photosynthetic organisms;ko00720//Carbon fixation pathways in prokaryotes	0	0	0
Unigene0033614	2.71682	8.64467	1.66989	1.07936e-05	0.000137245	0	0	0	0	0
Unigene0003451	1.74787	5.57017	1.67213	9.0887e-05	0.000930509	PREDICTED: calcium0transporting ATPase 9, plasma membrane0type0like [Cicer arietinum]	0	GO:0031224//intrinsic to membrane	GO:0032550;GO:0005515//protein binding;GO:0019829//cation0transporting ATPase activity;GO:0043169//cation binding	GO:0072503;GO:0003006//developmental process involved in reproduction;GO:0009566//fertilization;GO:0051707//response to other organism;GO:0009664//plant0type cell wall organization;GO:0006816//calcium ion transport;GO:0010208//pollen wall assembly;GO:0000904//cell morphogenesis involved in differentiation
Unigene0030471	3.87674	12.3685	1.67376	2.37392e-07	4.02446e-06	0	0	0	0	0
Unigene0007949	1.21168	3.87177	1.67598	1.94044e-06	2.82943e-05	0	0	0	0	0
Unigene0038293	6.44752	20.6021	1.67598	5.40656e-09	1.14142e-07	Midasin [Medicago truncatula]	ko03008//Ribosome biogenesis in eukaryotes	GO:0005911//cell0cell junction;GO:0009526//plastid envelope	GO:0032550;GO:0017111//nucleoside0triphosphatase activity	GO:0051603//proteolysis involved in cellular protein catabolic process;GO:0006996//organelle organization;GO:0006006//glucose metabolic process;GO:0009154
Unigene0049927	2.94164	9.3996	1.67598	1.94044e-06	2.83002e-05	PREDICTED: phosphate transporter PHO1 homolog 90like [Glycine max]	0	GO:0031224//intrinsic to membrane	0	GO:0015698//inorganic anion transport;GO:0009267//cellular response to starvation
Unigene0053117	1.47955	4.72769	1.67598	1.94044e-06	2.83061e-05	0	0	0	0	0
Unigene0021641	23.3991	74.925	1.679	4.66294e-15	2.40703e-13	PREDICTED: 30ketoacyl0CoA synthase 110like [Glycine max]	0	GO:0043231//intracellular membrane0bounded organelle	GO:0016746//transferase activity, transferring acyl groups	GO:0009314//response to radiation;GO:0006996//organelle organization;GO:0006631//fatty acid metabolic process;GO:0016129;GO:0006637//acyl0CoA metabolic process;GO:0051273;GO:0040007//growth;GO:0006970//response to osmotic stress;GO:0042546//cell wall biogenesis;GO:0070838//divalent metal ion transport
Unigene0004268	2.06036	6.59823	1.67918	1.60821e-05	0.000197638	Lysine0specific demethylase 3A [Medicago truncatula]	0	0	0	0
Unigene0054148	1.22141	3.91153	1.67918	1.60821e-05	0.000197568	0	0	0	0	0
Unigene0058158	0.869834	2.78561	1.67918	1.60821e-05	0.000197603	PREDICTED: ethylene0responsive transcription factor CRF20like [Cicer arietinum]	0	0	0	0
Unigene0030420	12.3418	39.7519	1.68747	7.77156e-14	3.66593e-12	PREDICTED: kinesin0like protein KIF18B0like [Glycine max]	0	0	0	0
Unigene0040485	0.653377	2.10517	1.68795	5.22284e-07	8.40273e-06	PREDICTED: serine/threonine0protein kinase PEPKR20like [Cicer arietinum]	0	GO:0043231//intracellular membrane0bounded organelle	GO:0004674//protein serine/threonine kinase activity;GO:0032550	GO:0006796//phosphate0containing compound metabolic process;GO:0006464//protein modification process
Unigene0048455	3.06443	9.87355	1.68795	5.22284e-07	8.4008e-06	0	0	0	0	0
Unigene0040435	3.48677	11.2463	1.68949	2.39688e-05	0.00028105	0	0	0	0	0
Unigene0049947	2.76192	8.9084	1.68949	2.39688e-05	0.000280956	0	0	0	0	0
Unigene0053204	1.42042	4.58146	1.68949	2.18996e-09	4.84384e-08	At2g20670/F23N11.1 [Arabidopsis thaliana]	0	0	0	0
Unigene0060314	0.848652	2.73727	1.68949	2.39688e-05	0.000281097	Receptor0like0kinase [Medicago truncatula]	0	0	GO:0004672//protein kinase activity;GO:0032550	GO:0006796//phosphate0containing compound metabolic process;GO:0006464//protein modification process
Unigene0061005	0.756208	2.4391	1.68949	2.39688e-05	0.000281003	PREDICTED: uncharacterized protein LOC101502922 [Cicer arietinum]	0	0	0	0
Unigene0054028	2.0428	6.59804	1.69149	4.07506e-10	9.78587e-09	0	0	0	0	0
Unigene0015546	1.13179	3.65986	1.69319	4.28624e-06	5.8895e-05	0	0	0	0	0
Unigene0037387	2.09529	6.77553	1.69319	1.75239e-08	3.46467e-07	0	0	0	0	0
Unigene0048775	2.43031	7.86683	1.69465	1.45841e-11	4.14275e-10	PREDICTED: homeobox protein knotted010like 30like isoform X2 [Cicer arietinum]	0	0	GO:0003677//DNA binding	0
Unigene0052137	1.44197	4.67172	1.69591	7.74878e-07	1.21539e-05	0	0	0	0	0
Unigene0048843	0.390888	1.26824	1.698	1.41289e-07	2.47553e-06	Protein argonaute [Medicago truncatula]	0	0	0	0
Unigene0030416	6.04686	19.6394	1.69949	0	0	PREDICTED: histone deacetylase 90like [Cicer arietinum]	ko04110//Cell cycle;ko05016//Huntington's disease;ko05200//Pathways in cancer;ko05220//Chronic myeloid leukemia;ko04330//Notch signaling pathway	0	0	0
Unigene0050720	0.764224	2.4847	1.70101	3.57328e-05	0.000403132	PREDICTED: LOB domain0containing protein 60like isoform X1 [Cicer arietinum]	0	GO:0031981//nuclear lumen	GO:0005488//binding	GO:0009943//adaxial/abaxial axis specification;GO:0048437//floral organ development
Unigene0006834	1.25121	4.07803	1.70455	1.14979e-06	1.75433e-05	0	0	0	0	0
Unigene0086644	0.65239	2.12798	1.70568	2.09392e-07	3.58011e-06	PREDICTED: probable folate0biopterin transporter 40like [Cicer arietinum]	0	0	0	0
Unigene0047513	4.65579	15.1913	1.70615	1.43663e-13	6.48417e-12	0	0	0	0	0
Unigene0049049	3.77734	12.3286	1.70657	3.84226e-08	7.30781e-07	0	0	0	0	0
Unigene0049411	2.15848	7.05128	1.70787	1.31907e-09	2.99513e-08	0	0	0	0	0
Unigene0018518	1.11921	3.65853	1.70878	4.6743e-11	1.25164e-09	PREDICTED: growth0regulating factor 30like [Cicer arietinum]	0	0	0	0
Unigene0007229	1.18042	3.87244	1.71395	5.32824e-05	0.000577321	0	0	0	0	0
Unigene0017581	0.485657	1.59323	1.71395	3.1037e-07	5.16171e-06	Leucine0rich repeat receptor0like protein kinase [Medicago truncatula]	0	GO:0031224//intrinsic to membrane;GO:0043231//intracellular membrane0bounded organelle	GO:0032550;GO:0003676//nucleic acid binding;GO:0004672//protein kinase activity	GO:0007167//enzyme linked receptor protein signaling pathway;GO:0006464//protein modification process;GO:0006796//phosphate0containing compound metabolic process;GO:0006351//transcription, DNA0dependent
Unigene0006683	1.34195	4.40235	1.71395	9.47378e-06	0.000121767	0	0	0	0	0
Unigene0008351	0.319361	1.04769	1.71395	5.32824e-05	0.000577053	PREDICTED: xaa0Pro dipeptidase0like [Cicer arietinum]	0	0	0	0
Unigene0027143	2.6751	8.77584	1.71395	3.65588e-10	8.82463e-09	0	0	0	0	0
Unigene0035351	0.25513	0.83697	1.71395	5.32824e-05	0.000577142	PREDICTED: pentatricopeptide repeat0containing protein At2g03880, mitochondrial0like [Cicer arietinum]	0	GO:0043231//intracellular membrane0bounded organelle	0	GO:0016070//RNA metabolic process
Unigene0048297	1.33187	4.3693	1.71395	1.0509e-08	2.13067e-07	PREDICTED: heat shock cognate 70 kDa protein0like [Solanum lycopersicum]	ko03040//Spliceosome;ko04141//Protein processing in endoplasmic reticulum;ko04144//Endocytosis;ko04010//MAPK signaling pathway;ko05145//Toxoplasmosis;ko04612//Antigen processing and presentation;ko05162//Measles	0	0	0
Unigene0052400	1.1128	3.65061	1.71395	5.32824e-05	0.000576964	0	0	0	0	0
Unigene0053013	0.407382	1.33644	1.71395	5.32824e-05	0.00057741	PREDICTED: myosin0H heavy chain0like [Cicer arietinum]	0	GO:0031224//intrinsic to membrane;GO:0043231//intracellular membrane0bounded organelle;GO:0015629//actin cytoskeleton	GO:0008092//cytoskeletal protein binding;GO:0017111//nucleoside0triphosphatase activity;GO:0032550;GO:0004672//protein kinase activity;GO:0060089	GO:0010208//pollen wall assembly;GO:0051640//organelle localization;GO:0007010//cytoskeleton organization;GO:0006464//protein modification process;GO:0006928//cellular component movement;GO:0007154//cell communication
Unigene0055525	0.819181	2.68738	1.71395	5.32824e-05	0.000577231	0	0	0	0	0
Unigene0058207	1.18072	3.88692	1.71896	1.97335e-11	5.51822e-10	U0box domain0containing protein [Medicago truncatula]	0	0	GO:0003824//catalytic activity	0
Unigene0018027	0.488015	1.61442	1.72602	1.40865e-05	0.000174955	PREDICTED: translation initiation factor eIF02B subunit delta0like [Cicer arietinum]	ko03013//RNA transport	GO:0043231//intracellular membrane0bounded organelle	GO:0032550;GO:0008135//translation factor activity, nucleic acid binding	GO:0006412//translation
Unigene0004847	0.815536	2.70008	1.72718	4.28912e-09	9.15444e-08	PREDICTED: pseudouridine05'0monophosphatase0like [Cicer arietinum]	ko00740//Riboflavin metabolism	0	0	0
Unigene0051694	1.74819	5.79357	1.72859	7.94644e-05	0.000825998	0	0	0	0	0
Unigene0057898	0.672951	2.23019	1.72859	7.94644e-05	0.000826121	0	0	0	0	0
Unigene0037101	0.919941	3.05712	1.73256	6.8213e-07	1.07934e-05	0	0	0	0	0
Unigene0018694	1.95379	6.50112	1.73441	6.36144e-09	1.33138e-07	Glycosyl transferase, family 28 [Medicago truncatula]	0	0	0	0
Unigene0017380	0.407395	1.35658	1.73548	3.7582e-06	5.2151e-05	PREDICTED: EPIDERMAL PATTERNING FACTOR0like protein 60like [Cicer arietinum]	0	0	0	0
Unigene0006265	3.41485	11.3741	1.73586	0	0	PREDICTED: probable serine/threonine0protein kinase cdc70like isoform X1 [Cicer arietinum]	0	0	0	0
Unigene0004014	0.497768	1.66212	1.73948	2.09452e-05	0.000249862	PREDICTED: LOW QUALITY PROTEIN: uncharacterized LOC101216066 [Cucumis sativus]	0	GO:0043231//intracellular membrane0bounded organelle	0	0
Unigene0050937	2.48373	8.29354	1.73948	2.09452e-05	0.000249905	0	0	0	0	0
Unigene0050126	3.49604	11.695	1.7421	9.4408e-09	1.92356e-07	0	0	0	0	0
Unigene0083392	0.683828	2.28913	1.74309	1.01136e-06	1.55635e-05	Os09g0514500 [Oryza sativa Japonica Group]	0	0	0	0
Unigene0009656	0.598238	2.00569	1.74531	5.07132e-08	9.45796e-07	0	0	0	0	0
Unigene0005315	0.417686	1.40429	1.74935	2.74556e-07	4.60545e-06	PREDICTED: centromere0associated protein E0like [Cicer arietinum]	0	0	0	0
Unigene0007485	1.96509	6.63079	1.75459	3.11402e-05	0.000355789	0	0	0	0	0
Unigene0023934	1.85012	6.24287	1.75459	3.91926e-09	8.38803e-08	0	0	0	0	0
Unigene0028132	2.28929	7.72476	1.75459	3.11402e-05	0.000355847	0	0	0	0	0
Unigene0029363	1.19704	4.03918	1.75459	3.11402e-05	0.000355731	PREDICTED: 10aminocyclopropane010carboxylate oxidase homolog 110like [Cicer arietinum]	0	0	GO:0016705//oxidoreductase activity, acting on paired donors, with incorporation or reduction of molecular oxygen	GO:0044710
Unigene0037840	1.76031	5.93982	1.75459	1.49951e-06	2.23773e-05	0	0	0	0	0
Unigene0040641	0.662206	2.23448	1.75459	1.49951e-06	2.23725e-05	DNA0directed RNA polymerase [Medicago truncatula]	0	0	0	0
Unigene0051679	1.74339	5.8827	1.75459	1.49951e-06	2.23821e-05	0	0	0	0	0
Unigene0030830	1.33057	4.48973	1.75459	3.11402e-05	0.000355673	0	0	0	0	0
Unigene0013112	1.76403	5.98473	1.76241	5.70876e-13	2.2303e-11	0	0	0	0	0
Unigene0086071	0.757571	2.57402	1.76457	1.11654e-07	1.98762e-06	0	0	0	0	0
Unigene0005145	0.840056	2.85428	1.76457	1.11654e-07	1.98812e-06	0	0	0	0	0
Unigene0040090	2.06531	7.03009	1.76719	2.22312e-06	3.21087e-05	0	0	0	0	0
Unigene0052767	1.70204	5.79357	1.76719	2.22312e-06	3.21021e-05	0	0	0	0	0
Unigene0047559	3.83054	13.0451	1.76788	0	0	Sigma factor sigB regulation protein rsbQ [Medicago truncatula]	0	0	0	0
Unigene0041158	2.55646	8.70921	1.76839	3.09798e-08	5.93898e-07	0	0	0	0	0
Unigene0048745	4.33283	14.7608	1.76839	1.32561e-13	6.01798e-12	PREDICTED: scarecrow0like protein 30like isoform X1 [Cicer arietinum]	0	0	0	GO:0006351//transcription, DNA0dependent
Unigene0016523	1.14754	3.91826	1.77166	4.62874e-05	0.000509729	0	0	0	0	0
Unigene0051628	1.49845	5.1164	1.77166	8.7101e-09	1.7882e-07	0	0	0	0	0
Unigene0018340	12.6973	43.382	1.77257	7.32748e-15	3.74113e-13	0	0	0	0	0
Unigene0049074	0.827909	2.83726	1.77696	7.23336e-10	1.69009e-08	UNIFOLIATA protein [Pisum sativum]	0	GO:0043231//intracellular membrane0bounded organelle	GO:0001071//nucleic acid binding transcription factor activity;GO:0003677//DNA binding;GO:0046983//protein dimerization activity;GO:0003682//chromatin binding	GO:0010074//maintenance of meristem identity;GO:0010476//gibberellin mediated signaling pathway;GO:0009791//post0embryonic development;GO:0006351//transcription, DNA0dependent;GO:0003006//developmental process involved in reproduction
Unigene0056644	0.874215	3.01132	1.78434	8.95052e-07	1.38957e-05	gag/pol polyprotein [Pisum sativum]	0	0	0	0
Unigene0058950	0.553794	1.9076	1.78434	8.95052e-07	1.38988e-05	0	0	0	0	0
Unigene0023594	1.13234	3.9077	1.78701	3.26524e-10	7.92265e-09	ORF1 [Pisum sativum]	0	0	0	0
Unigene0039328	1.5696	5.41666	1.78701	3.26524e-10	7.92539e-09	PREDICTED: uncharacterized protein LOC101496404 isoform X1 [Cicer arietinum]	0	0	0	0
Unigene0032732	0.577427	1.99577	1.78923	6.86492e-08	1.25655e-06	Mitogen0activated protein kinase [Medicago truncatula]	ko04810//Regulation of actin cytoskeleton;ko04666//Fc gamma R0mediated phagocytosis;ko05200//Pathways in cancer;ko04010//MAPK signaling pathway;ko04114//Oocyte meiosis;ko04722//Neurotrophin signaling pathway;ko05010//Alzheimer's disease;ko04510//Focal adhesion;ko05145//Toxoplasmosis;ko04520//Adherens junction;ko05211//Renal cell carcinoma;ko05131//Shigellosis;ko04370//VEGF signaling pathway;ko043…	0	GO:0004702//receptor signaling protein serine/threonine kinase activity;GO:0032550	GO:0006796//phosphate0containing compound metabolic process;GO:0006464//protein modification process
Unigene0050431	2.58709	8.9418	1.78923	2.64012e-13	1.12836e-11	Leucine0rich repeat0containing protein [Medicago truncatula]	0	0	0	0
Unigene0009083	0.742614	2.57005	1.79111	1.94461e-08	3.82419e-07	RING0H2 finger protein ATL4K [Medicago truncatula]	0	0	GO:0046914//transition metal ion binding	GO:0006066//alcohol metabolic process;GO:0009725//response to hormone stimulus;GO:0006970//response to osmotic stress;GO:0010243//response to organic nitrogen
Unigene0086285	0.68759	2.37962	1.79111	6.87752e-05	0.000725875	Magnesium0dependent phosphatase [Medicago truncatula]	0	0	0	0
Unigene0027848	10.4954	36.3556	1.79242	0	0	MLP0like protein [Medicago truncatula]	0	0	0	GO:0006950//response to stress
Unigene0049028	1.91527	6.64221	1.79412	1.82062e-05	0.000220683	ATPase family AAA domain0containing protein 10A isoform 1 [Theobroma cacao]	0	GO:0043231//intracellular membrane0bounded organelle	GO:0042623//ATPase activity, coupled;GO:0032550	0
Unigene0058972	0.618109	2.14362	1.79412	1.82062e-05	0.000220645	gag0pol polyprotein [Silene latifolia]	0	0	GO:0005488//binding	0
Unigene0049355	2.85399	9.91345	1.79641	4.88348e-06	6.63337e-05	0	0	0	0	0
Unigene0053404	1.16754	4.0555	1.79641	4.88348e-06	6.63208e-05	0	0	0	0	0
Unigene0049777	2.98343	10.3631	1.79641	0	0	Adenylate isopentenyltransferase [Medicago truncatula]	ko00908//Zeatin biosynthesis	0	GO:0016765//transferase activity, transferring alkyl or aryl (other than methyl) groups	GO:0044260;GO:0090304
Unigene0013664	1.75275	6.09227	1.79736	4.91202e-11	1.31129e-09	peroxidase [Pisum sativum]	ko00680//Methane metabolism;ko00940//Phenylpropanoid biosynthesis;ko00360//Phenylalanine metabolism	0	0	0
Unigene0049334	3.81921	13.2828	1.79821	1.63185e-11	4.61297e-10	0	0	0	0	0
Unigene0003327	1.31024	4.56149	1.79968	2.1514e-12	7.26282e-11	0	0	0	0	0
Unigene0005887	3.78484	13.1766	1.79968	2.1514e-12	7.25932e-11	0	0	0	0	0
Unigene0049648	2.95847	10.2997	1.79968	0	0	0	0	0	0	0
Unigene0001906	0.511051	1.78067	1.80088	1.02299e-07	1.83413e-06	hypothetical protein MTR_1g099760 [Medicago truncatula]	0	0	0	0
Unigene0043056	43.693	152.639	1.80465	5.01222e-12	1.54466e-10	Cyclin D301 [Medicago truncatula]	ko04075//Plant hormone signal transduction	0	0	0
Unigene0009912	1.14637	4.00758	1.80566	2.529e-11	6.98006e-10	0	0	0	0	0
Unigene0053292	2.43638	8.52379	1.80676	1.32272e-12	4.67012e-11	CUB and sushi domain0containing protein 3 [Theobroma cacao]	0	0	GO:0046914//transition metal ion binding	0
Unigene0004469	2.16996	7.62718	1.81348	1.96752e-06	2.86772e-05	PREDICTED: probable protein phosphatase 2C 100like [Glycine max]	0	0	0	0
Unigene0013652	0.819887	2.88182	1.81348	2.6982e-05	0.00031308	G2/mitotic0specific cyclin01 [Medicago truncatula]	ko04110//Cell cycle;ko04914//Progesterone0mediated oocyte maturation;ko04115//p53 signaling pathway	GO:0043231//intracellular membrane0bounded organelle	GO:0019900//kinase binding	GO:0051726//regulation of cell cycle
Unigene0051977	2.01458	7.08103	1.81348	7.23376e-06	9.53193e-05	0	0	0	0	0
Unigene0085348	0.434058	1.52567	1.81348	2.6982e-05	0.000313028	pectin methylesterase [Pisum sativum]	ko00500//Starch and sucrose metabolism;ko00040//Pentose and glucuronate interconversions	0	0	0
Unigene0050667	2.39128	8.44245	1.81988	5.32686e-13	2.09866e-11	hypothetical protein MTR_3g026820 [Medicago truncatula]	0	0	0	0
Unigene0052365	1.57337	5.5829	1.82716	2.27612e-07	3.87272e-06	hydroxyproline0rich glycoprotein family protein [Arabidopsis thaliana]	0	0	0	0
Unigene0020628	0.650275	2.31254	1.83036	2.91596e-06	4.12897e-05	0	0	0	0	0
Unigene0051421	0.499941	1.78067	1.83259	1.07084e-05	0.00013626	0	0	0	0	0
Unigene0014704	1.15802	4.12845	1.83395	2.75624e-09	6.01845e-08	Pre0mRNA0splicing factor SF2 [Medicago truncatula]	0	0	GO:0036094;GO:0097159	0
Unigene0020386	2.42829	8.66648	1.83551	7.1445e-12	2.12512e-10	0	0	0	0	0
Unigene0057021	0.682019	2.4341	1.83551	8.84628e-09	1.81403e-07	0	0	0	0	0
Unigene0085849	0.267361	0.954204	1.83551	3.99542e-05	0.000445803	PREDICTED: aluminum0activated malate transporter 120like [Cicer arietinum]	0	0	0	0
Unigene0040483	2.61364	9.34416	1.838	5.3714e-11	1.42956e-09	0	0	0	0	0
Unigene0049324	2.90734	10.4048	1.83948	9.83426e-08	1.76681e-06	0	0	0	0	0
Unigene0051774	2.00566	7.19069	1.84205	3.39806e-07	5.61791e-06	0	0	0	0	0
Unigene0006650	0.285082	1.0243	1.84519	1.19965e-06	1.82643e-05	PREDICTED: pentatricopeptide repeat0containing protein At5g42310, mitochondrial0like isoform X2 [Cicer arietinum]	0	GO:0009536//plastid	0	0
Unigene0011593	7.60125	27.3462	1.84703	4.50972e-13	1.81761e-11	0	0	0	0	0
Unigene0030218	2.10241	7.56711	1.8477	1.35415e-08	2.71097e-07	Glycerol kinase [Medicago truncatula]	ko04626//Plant0pathogen interaction;ko00561//Glycerolipid metabolism;ko03320//PPAR signaling pathway	0	0	0
Unigene0007780	0.928615	3.34558	1.84911	4.31936e-06	5.93268e-05	PREDICTED: glucomannan 40beta0mannosyltransferase 90like [Cicer arietinum]	0	0	0	0
Unigene0049569	2.527	9.10418	1.84911	4.31936e-06	5.93152e-05	0	0	0	0	0
Unigene0020730	0.490159	1.77208	1.85412	1.47907e-07	2.58566e-06	0	0	0	0	0
Unigene0006913	0.254652	0.920648	1.85412	1.58377e-05	0.000194668	PREDICTED: uncharacterized LOC101206756, partial [Cucumis sativus]	0	GO:0043231//intracellular membrane0bounded organelle	GO:0016740//transferase activity	0
Unigene0050463	1.74339	6.3029	1.85412	1.58377e-05	0.000194702	0	0	0	0	0
Unigene0039600	2.42435	8.77956	1.85655	1.3701e-10	3.49888e-09	0	0	0	0	0
Unigene0047798	5.26129	19.0619	1.8572	6.60298e-09	1.37987e-07	ATP synthase subunit beta [Medicago truncatula]	0	0	0	0
Unigene0051463	1.06134	3.85484	1.86079	2.07764e-08	4.0664e-07	0	0	0	0	0
Unigene0052574	1.19023	4.32299	1.86079	5.90922e-05	0.00063487	0	0	0	0	0
Unigene0048647	1.00597	3.66069	1.86352	1.78222e-06	2.61834e-05	30ketoacyl0CoA synthase [Medicago truncatula]	0	0	0	0
Unigene0047762	3.80109	13.8949	1.87006	4.1196e-12	1.30164e-10	PREDICTED: cyclin0dependent kinase 120like [Cicer arietinum]	0	0	0	0
Unigene0022579	1.34107	4.90225	1.87006	6.39338e-06	8.50133e-05	0	0	0	0	0
Unigene0050135	2.78204	10.1832	1.87198	8.39328e-14	3.94062e-12	Cytochrome P450 [Medicago truncatula]	0	0	GO:0005488//binding	0
Unigene0013563	1.08122	3.97577	1.87858	2.33948e-05	0.000275102	0	0	0	0	0
Unigene0020094	12.2432	45.0704	1.8802	4.4409e-16	2.38011e-14	PREDICTED: uncharacterized protein LOC101495849 isoform X1 [Cicer arietinum]	0	0	0	0
Unigene0007840	1.06238	3.91195	1.8806	1.0213e-07	1.83158e-06	Protein TIFY [Medicago truncatula]	ko04075//Plant hormone signal transduction;ko04626//Plant0pathogen interaction	0	0	0
Unigene0030168	1.18505	4.37358	1.88387	2.64658e-06	3.77039e-05	0	0	0	0	0
Unigene0008255	3.03432	11.2232	1.88704	0	0	PREDICTED: probable ATP0dependent RNA helicase DDX110like isoform X1 [Cicer arietinum]	0	GO:0043231//intracellular membrane0bounded organelle	GO:0003678//DNA helicase activity;GO:0032550;GO:0003676//nucleic acid binding;GO:0042623//ATPase activity, coupled	GO:0010212//response to ionizing radiation;GO:0000723//telomere maintenance;GO:0006260//DNA replication;GO:0007127//meiosis I;GO:0032392//DNA geometric change
Unigene0015535	5.8175	21.5555	1.88958	0	0	hypothetical protein MTR_2g033380 [Medicago truncatula]	0	0	0	0
Unigene0005395	0.70825	2.62521	1.8901	8.7254e-05	0.0008987	reverse transcriptase family member [Glycine max]	0	0	0	0
Unigene0014086	0.210739	0.781128	1.8901	8.7254e-05	0.000898567	PREDICTED: inactive TPR repeat0containing thioredoxin TTL30like [Cicer arietinum]	0	0	0	0
Unigene0050585	2.29393	8.51444	1.89209	8.3796e-09	1.72439e-07	PAB0dependent poly(A)0specific ribonuclease subunit PAN3 [Theobroma cacao]	0	GO:0043231//intracellular membrane0bounded organelle	0	0
Unigene0021940	4.12073	15.3116	1.89365	1.60599e-09	3.6034e-08	0	0	0	0	0
Unigene0014642	0.441302	1.63977	1.89365	9.453e-06	0.000121522	PREDICTED: UBX domain0containing protein 70like [Cicer arietinum]	0	0	0	0
Unigene0049565	1.59981	5.99805	1.90659	3.45e-05	0.000390671	0	0	0	0	0
Unigene0053212	1.06738	4.00184	1.90659	3.92736e-06	5.42405e-05	0	0	0	0	0
Unigene0023690	0.60057	2.25871	1.91109	4.03278e-12	1.27709e-10	Protein kinase family protein [Medicago truncatula]	0	GO:0043231//intracellular membrane0bounded organelle;GO:0031090//organelle membrane	GO:0032550;GO:0004672//protein kinase activity;GO:0043167//ion binding;GO:0019899//enzyme binding	GO:0045229//external encapsulating structure organization;GO:0006796//phosphate0containing compound metabolic process;GO:0022610;GO:0009933//meristem structural organization;GO:0007015//actin filament organization;GO:0000904//cell morphogenesis involved in differentiation;GO:0006464//protein modification process;GO:0010087//phloem or xylem histogenesis;GO:0010053//root epidermal cell differentiat…
Unigene0004674	1.942	7.32235	1.91476	7.70494e-13	2.89707e-11	Zinc finger protein [Medicago truncatula]	0	0	0	0
Unigene0039166	1.52015	5.73175	1.91476	3.9005e-08	7.40651e-07	0	0	0	0	0
Unigene0016725	0.911357	3.43936	1.91605	2.37454e-07	4.02454e-06	0	0	0	0	0
Unigene0003983	3.08515	11.6781	1.9204	4.15606e-09	8.88397e-08	Polygalacturonase0like protein [Medicago truncatula]	0	0	GO:0004553//hydrolase activity, hydrolyzing O0glycosyl compounds	GO:0044238//primary metabolic process
Unigene0007491	0.799545	3.02649	1.9204	1.39559e-05	0.000173425	0	0	0	0	0
Unigene0049310	2.2664	8.6222	1.92765	7.6341e-07	1.19821e-05	0	0	0	0	0
Unigene0051941	0.795229	3.03473	1.93213	5.82164e-06	7.81077e-05	0	0	0	0	0
Unigene0081580	1.20875	4.62627	1.93634	3.62654e-07	5.9759e-06	PREDICTED: conserved oligomeric Golgi complex subunit 30like [Cicer arietinum]	0	0	0	0
Unigene0002344	2.1356	8.18197	1.93781	4.01946e-12	1.2746e-10	protein little zipper 3 [Arabidopsis thaliana]	0	GO:0043231//intracellular membrane0bounded organelle	0	GO:0044248//cellular catabolic process;GO:0006631//fatty acid metabolic process;GO:0044092//negative regulation of molecular function;GO:0009965//leaf morphogenesis;GO:0010051//xylem and phloem pattern formation;GO:0010073//meristem maintenance;GO:0009798//axis specification
Unigene0007831	1.28839	4.94026	1.93901	3.32032e-08	6.34958e-07	0	0	0	0	0
Unigene0015414	0.392296	1.50423	1.93901	5.07606e-05	0.00055437	0	0	0	0	0
Unigene0020334	0.178265	0.683546	1.93901	5.07606e-05	0.000554111	RNA0directed DNA polymerase (Reverse transcriptase) [Medicago truncatula]	0	0	0	0
Unigene0020454	0.877831	3.36598	1.93901	5.07606e-05	0.000554197	0	0	0	0	0
Unigene0034011	1.00933	3.8702	1.93901	5.07606e-05	0.000554284	Receptor0like kinase [Medicago truncatula]	0	0	GO:0016772//transferase activity, transferring phosphorus0containing groups	0
Unigene0081868	0.734057	2.83815	1.95098	2.05616e-05	0.00024583	PREDICTED: probable LRR receptor0like serine/threonine0protein kinase At1g561300like [Glycine max]	0	0	0	0
Unigene0027290	1.96367	7.5923	1.95098	2.05616e-05	0.000245872	0	0	0	0	0
Unigene0017871	0.758441	2.94811	1.95868	5.54244e-07	8.8802e-06	0	0	0	0	0
Unigene0052108	1.27158	4.9427	1.95868	5.54244e-07	8.88223e-06	0	0	0	0	0
Unigene0038187	2.86051	11.1372	1.96104	3.78228e-09	8.11221e-08	Cytokinin0O0glucosyltransferase [Medicago truncatula]	0	0	GO:0016757//transferase activity, transferring glycosyl groups	0
Unigene0039123	5.35898	20.8768	1.96187	2.48024e-13	1.0685e-11	0	0	0	0	0
Unigene0026592	0.360769	1.41299	1.9696	3.7705e-06	5.23009e-05	NifU0like protein [Medicago truncatula]	0	GO:0043231//intracellular membrane0bounded organelle	GO:0046914//transition metal ion binding;GO:0051540	GO:0009058//biosynthetic process
Unigene0009410	1.38759	5.46251	1.97698	1.73775e-06	2.55623e-05	0	0	0	0	0
Unigene0013866	0.61337	2.41464	1.97698	7.44564e-05	0.000779145	PREDICTED: phospholipase D delta0like [Cicer arietinum]	0	0	GO:0046872//metal ion binding;GO:0004620//phospholipase activity	GO:0006650//glycerophospholipid metabolic process
Unigene0019590	0.660117	2.59867	1.97698	1.73775e-06	2.55676e-05	0	0	0	0	0
Unigene0082991	0.281191	1.10696	1.97698	7.44564e-05	0.000779029	0	0	0	0	0
Unigene0011259	0.961128	3.79237	1.9803	3.06452e-10	7.47186e-09	PREDICTED: uncharacterized membrane protein sll08750like [Cicer arietinum]	0	GO:0031224//intrinsic to membrane;GO:0009528//plastid inner membrane	0	GO:0048588//developmental cell growth
Unigene0047840	7.2442	28.6151	1.98188	0	0	PREDICTED: heat shock cognate 70 kDa protein 20like [Cicer arietinum]	ko03040//Spliceosome;ko04141//Protein processing in endoplasmic reticulum;ko04144//Endocytosis;ko04010//MAPK signaling pathway;ko05145//Toxoplasmosis;ko04612//Antigen processing and presentation;ko05162//Measles	0	0	0
Unigene0011186	0.549847	2.17424	1.98341	8.4729e-07	1.32305e-05	PREDICTED: cytochrome c oxidase assembly protein COX11, mitochondrial0like [Glycine max]	ko00190//Oxidative phosphorylation	GO:0009536//plastid	GO:0046914//transition metal ion binding	GO:0006089//lactate metabolic process
Unigene0050271	1.39851	5.55173	1.98905	4.36516e-07	7.1094e-06	Senescence associated gene 18 isoform 1 [Theobroma cacao]	0	GO:0031224//intrinsic to membrane;GO:0009536//plastid	GO:0016810//hydrolase activity, acting on carbon0nitrogen (but not peptide) bonds	GO:0006665//sphingolipid metabolic process
Unigene0017682	0.969583	3.86238	1.99405	1.27236e-05	0.00015947	0	0	0	0	0
Unigene0054217	0.609339	2.42733	1.99405	2.3605e-07	4.00268e-06	CONSTANS0like zinc finger protein [Medicago truncatula]	0	0	0	0
Unigene0022289	0.597026	2.38904	2.00057	5.61676e-06	7.55469e-05	PREDICTED: probable membrane0associated kinase regulator 60like [Cicer arietinum]	0	0	0	0
Unigene0053863	0.758384	3.03473	2.00057	5.61676e-06	7.55324e-05	0	0	0	0	0
Unigene0024887	1.77063	7.09486	2.00252	7.67296e-08	1.39933e-06	0	0	0	0	0
Unigene0034418	1.77063	7.13635	2.01093	1.29504e-06	1.95973e-05	PREDICTED: uncharacterized protein LOC101493502 isoform X3 [Cicer arietinum]	0	0	0	0
Unigene0007242	0.93567	3.80037	2.02207	2.10554e-07	3.59734e-06	0	0	0	0	0
Unigene0050800	1.73671	7.08103	2.02761	4.4223e-05	0.000489071	0	0	0	0	0
Unigene0054760	1.03489	4.21952	2.02761	4.4223e-05	0.000488994	0	0	0	0	0
Unigene0010448	0.560864	2.29397	2.03212	1.8733e-05	0.000226324	0	0	0	0	0
Unigene0015284	0.713317	2.91751	2.03212	1.8733e-05	0.000226285	0	0	0	0	0
Unigene0024457	0.558978	2.28625	2.03212	1.8733e-05	0.000226246	0	0	0	0	0
Unigene0063146	0.480085	1.96869	2.03587	8.349e-06	0.000108605	0	0	0	0	0
Unigene0004787	0.257302	1.05512	2.03587	8.349e-06	0.000108585	Os01g0850000 [Oryza sativa Japonica Group]	0	0	0	0
Unigene0039765	3.49753	14.3588	2.03752	5.95096e-09	1.24883e-07	0	0	0	0	0
Unigene0023462	1.56304	6.42364	2.03904	3.9437e-06	5.44554e-05	0	0	0	0	0
Unigene0084372	0.893502	3.67204	2.03904	3.6261e-09	7.80592e-08	0	0	0	0	0
Unigene0081982	0.495002	2.03814	2.04175	1.97791e-06	2.88047e-05	Os01g0299500 [Oryza sativa Japonica Group]	0	0	0	0
Unigene0009534	0.701983	2.89038	2.04175	1.97791e-06	2.87987e-05	PREDICTED: 50formyltetrahydrofolate cyclo0ligase0like isoform X3 [Cicer arietinum]	ko00670//One carbon pool by folate	GO:0043231//intracellular membrane0bounded organelle	GO:0032550;GO:0016882//cyclo0ligase activity	GO:0006760//folic acid0containing compound metabolic process
Unigene0040118	1.14341	4.70793	2.04175	1.97791e-06	2.87927e-05	PREDICTED: E3 ubiquitin0protein ligase UPL10like [Glycine max]	ko04120//Ubiquitin mediated proteolysis	0	GO:0019787//small conjugating protein ligase activity	GO:0032446//protein modification by small protein conjugation
Unigene0020892	2.39309	9.89585	2.04795	9.28146e-14	4.32573e-12	glutathione S0transferase GST 9 [Glycine max]	0	0	0	0
Unigene0042538	4.56718	18.9186	2.05043	7.32748e-15	3.74659e-13	Wound0induced protein [Medicago truncatula]	0	0	0	0
Unigene0019912	0.534469	2.21854	2.05343	4.29382e-08	8.1094e-07	cytochrome P450 enzyme [Pisum sativum]	ko00905//Brassinosteroid biosynthesis	0	GO:0046914//transition metal ion binding;GO:0016491//oxidoreductase activity;GO:0046906//tetrapyrrole binding	GO:0044710
Unigene0005139	1.7495	7.26738	2.05449	2.61374e-08	5.06193e-07	Protein FAM38B [Medicago truncatula]	0	0	0	0
Unigene0013081	1.23063	5.14943	2.06502	1.69065e-12	5.83103e-11	PREDICTED: growth0regulating factor 50like isoform X1 [Cicer arietinum]	0	GO:0043231//intracellular membrane0bounded organelle	GO:0032550;GO:0016817//hydrolase activity, acting on acid anhydrides	GO:0006351//transcription, DNA0dependent
Unigene0002396	1.17905	4.97309	2.07652	6.44134e-05	0.000684688	PREDICTED: polynucleotide 5'0hydroxyl0kinase NOL90like [Glycine max]	0	0	0	0
Unigene0006655	0.833236	3.51448	2.07652	2.74682e-05	0.000317879	20succinylbenzoate0CoA ligase [Medicago truncatula]	ko00130//Ubiquinone and other terpenoid0quinone biosynthesis	GO:0043231//intracellular membrane0bounded organelle;GO:0044444//cytoplasmic part	GO:0016874//ligase activity	GO:0008152//metabolic process
Unigene0015853	0.326571	1.37743	2.07652	2.74682e-05	0.000317774	Os01g0299500 [Oryza sativa Japonica Group]	0	0	0	0
Unigene0016114	0.61337	2.58712	2.07652	2.74682e-05	0.000318089	0	0	0	0	0
Unigene0025107	1.26301	5.32722	2.07652	6.44134e-05	0.000684584	0	0	0	0	0
Unigene0032313	2.64803	11.1691	2.07652	3.13558e-07	5.20731e-06	Cys0rich domain protein [Medicago truncatula]	0	0	0	0
Unigene0039636	1.00075	4.22103	2.07652	3.13558e-07	5.20854e-06	0	0	0	0	0
Unigene0053157	0.652202	2.7509	2.07652	2.74682e-05	0.000317826	0	0	0	0	0
Unigene0083764	0.261547	1.10317	2.07652	3.01654e-06	4.24991e-05	PREDICTED: protein DA10like isoform X1 [Cicer arietinum]	0	0	0	0
Unigene0040019	1.26997	5.35656	2.07652	3.01654e-06	4.25077e-05	gag/pol polyprotein [Pisum sativum]	0	0	GO:0003676//nucleic acid binding;GO:0004175//endopeptidase activity;GO:0016891//endoribonuclease activity, producing 5'0phosphomonoesters;GO:0034061	GO:0006260//DNA replication;GO:0019538//protein metabolic process
Unigene0049227	1.74339	7.35338	2.07652	2.74682e-05	0.000318036	0	0	0	0	0
Unigene0055846	0.605181	2.55258	2.07652	2.74682e-05	0.000317931	polyprotein [Arabidopsis thaliana]	0	0	GO:0005488//binding	0
Unigene0082759	2.45789	10.3671	2.07652	1.13975e-12	4.09429e-11	0	0	0	0	0
Unigene0083598	1.04442	4.40525	2.07652	2.74682e-05	0.000317984	0	0	0	0	0
Unigene0084573	1.62855	6.86903	2.07652	5.92464e-06	7.93073e-05	0	0	0	0	0
Unigene0039396	2.42306	10.2789	2.08478	8.39328e-14	3.94327e-12	0	0	0	0	0
Unigene0083307	1.30754	5.5661	2.08981	2.6239e-11	7.2249e-10	(+)0neomenthol dehydrogenase [Medicago truncatula]	0	0	0	0
Unigene0045939	9.53845	40.9197	2.10097	1.74305e-13	7.74739e-12	PREDICTED: homeobox protein knotted010like 40like [Cicer arietinum]	0	GO:0043231//intracellular membrane0bounded organelle;GO:0044444//cytoplasmic part	GO:0001071//nucleic acid binding transcription factor activity;GO:0003677//DNA binding	GO:0009314//response to radiation;GO:0048731;GO:0009720//detection of hormone stimulus;GO:0034097//response to cytokine stimulus;GO:0006351//transcription, DNA0dependent
Unigene0083244	0.563957	2.42825	2.10626	4.99816e-07	8.06162e-06	0	0	0	0	0
Unigene0048928	2.59017	11.2285	2.11604	9.67204e-09	1.9661e-07	PREDICTED: heat shock cognate 70 kDa protein 20like [Cicer arietinum]	ko03040//Spliceosome;ko04141//Protein processing in endoplasmic reticulum;ko04144//Endocytosis;ko04010//MAPK signaling pathway;ko05145//Toxoplasmosis;ko04612//Antigen processing and presentation;ko05162//Measles	0	GO:0016628//oxidoreductase activity, acting on the CH0CH group of donors, NAD or NADP as acceptor;GO:0032550	GO:0044710;GO:0050896//response to stimulus
Unigene0056313	0.473063	2.05578	2.11958	8.87348e-06	0.000114682	0	0	0	0	0
Unigene0085142	0.169999	0.738764	2.11958	8.87348e-06	0.000114704	PREDICTED: ALBINO30like protein 1, chloroplastic0like [Cicer arietinum]	ko03060//Protein export;ko03070//Bacterial secretion system	0	0	0
Unigene0007571	0.254081	1.1074	2.12382	1.82579e-05	0.000221156	PREDICTED: pentatricopeptide repeat0containing protein At2g176700like isoform X1 [Cicer arietinum]	0	0	0	0
Unigene0017942	0.247154	1.07721	2.12382	1.82579e-05	0.00022108	F0box protein [Medicago truncatula]	0	0	0	0
Unigene0030878	1.92068	8.37122	2.12382	1.82579e-05	0.000221195	0	0	0	0	0
Unigene0037755	1.26262	5.50309	2.12382	1.82579e-05	0.000221042	0	0	0	0	0
Unigene0083018	0.26758	1.16624	2.12382	1.82579e-05	0.000221118	Transcription factor tfiiib component [Medicago truncatula]	0	0	0	0
Unigene0048132	2.13667	9.33409	2.12714	1.34426e-09	3.04541e-08	PREDICTED: cyclin0dependent kinase 120like [Cicer arietinum]	0	0	GO:0043169//cation binding	GO:0006812//cation transport
Unigene0009807	0.40232	1.75978	2.12898	4.00554e-05	0.000446363	0	0	0	0	0
Unigene0039524	0.417556	1.82643	2.12898	4.00554e-05	0.000446506	0	0	0	0	0
Unigene0054288	0.754071	3.29837	2.12898	1.81768e-07	3.13073e-06	0	0	0	0	0
Unigene0086939	1.13006	4.94299	2.12898	4.00554e-05	0.000446434	0	0	0	0	0
Unigene0016684	42.7981	187.334	2.13	1.45639e-12	5.09584e-11	MLP0like protein [Medicago truncatula]	0	0	0	0
Unigene0014340	5.5591	24.3494	2.13096	3.61036e-09	7.77682e-08	0	0	0	0	0
Unigene0042335	36.579	160.69	2.13519	1.68998e-12	5.8316e-11	Remorin family protein [Theobroma cacao]	0	0	0	0
Unigene0040237	1.49228	6.55651	2.13541	9.31928e-05	0.000952585	PREDICTED: pentatricopeptide repeat0containing protein At1g12300, mitochondrial0like isoform X1 [Cicer arietinum]	0	0	0	0
Unigene0052304	1.33318	5.85747	2.13541	4.83878e-07	7.82076e-06	0	0	0	0	0
Unigene0045037	20.556	90.3855	2.13653	1.75082e-12	6.01783e-11	GT0like trihelix DNA0binding protein [Citrus unshiu]	0	0	0	0
Unigene0027870	1.31513	5.79357	2.13925	7.94882e-07	1.24537e-05	0	0	0	0	0
Unigene0047195	4.31695	19.0254	2.13984	1.2923e-13	5.87439e-12	PREDICTED: scarecrow0like protein 30like isoform X1 [Cicer arietinum]	0	0	0	0
Unigene0012732	1.05765	4.67348	2.14363	1.69065e-12	5.82816e-11	PREDICTED: trihelix transcription factor PTL0like [Cicer arietinum]	0	GO:0043231//intracellular membrane0bounded organelle	0	GO:0035265//organ growth;GO:0048446//petal morphogenesis;GO:0048442//sepal development;GO:0010243//response to organic nitrogen;GO:0003002//regionalization;GO:0048507//meristem development;GO:0009798//axis specification
Unigene0085563	1.14098	5.04584	2.14482	5.0182e-14	2.42595e-12	PREDICTED: non0structural maintenance of chromosome element 40like isoform X1 [Cicer arietinum]	0	0	0	0
Unigene0047847	3.4528	15.2973	2.14744	0	0	Methyl jasmonate esterase [Medicago truncatula]	0	0	0	0
Unigene0011053	1.53321	6.79853	2.14867	6.32516e-12	1.90814e-10	PREDICTED: uncharacterized protein LOC100780128 [Glycine max]	0	0	0	0
Unigene0010105	0.647543	2.87501	2.15052	1.11145e-07	1.97956e-06	Transport protein sec31 isoform 1 [Theobroma cacao]	0	0	GO:0016705//oxidoreductase activity, acting on paired donors, with incorporation or reduction of molecular oxygen	GO:0044710;GO:0009628//response to abiotic stimulus
Unigene0007642	1.63344	7.27241	2.15452	3.86042e-06	5.34213e-05	PREDICTED: uncharacterized LOC101206502 isoform 2 [Cucumis sativus]	0	0	0	0
Unigene0012842	0.619517	2.75822	2.15452	3.86042e-06	5.34107e-05	0	0	0	0	0
Unigene0058501	0.625934	2.78678	2.15452	3.86042e-06	5.34318e-05	0	0	0	0	0
Unigene0047972	4.25409	18.9744	2.15713	8.19754e-10	1.90205e-08	0	0	0	0	0
Unigene0044216	15.1743	67.7495	2.15858	3.00426e-13	1.26318e-11	DNA binding with one finger 2 protein [Pisum sativum]	0	0	0	0
Unigene0054647	1.55088	6.93787	2.1614	2.57604e-08	4.99306e-07	U0box domain0containing protein [Medicago truncatula]	0	0	GO:0016772//transferase activity, transferring phosphorus0containing groups	GO:0044237//cellular metabolic process
Unigene0034148	0.367624	1.65396	2.16963	1.32335e-05	0.000165269	PREDICTED: disease resistance protein RPM10like [Cicer arietinum]	0	0	GO:0036094;GO:0097159;GO:1901363	0
Unigene0051172	0.880156	3.97756	2.17605	1.26052e-06	1.91039e-05	PREDICTED: xylogalacturonan beta01,30xylosyltransferase0like [Cicer arietinum]	0	GO:0043231//intracellular membrane0bounded organelle	GO:0003824//catalytic activity	0
Unigene0051692	1.11921	5.07037	2.17961	1.79755e-07	3.0991e-06	hypothetical protein MTR_3g111360 [Medicago truncatula]	0	0	0	0
Unigene0001265	1.10143	5.00305	2.18343	2.07428e-06	3.00831e-05	0	0	0	0	0
Unigene0035971	1.69817	7.71363	2.18343	2.07428e-06	3.00768e-05	0	0	0	0	0
Unigene0002314	0.391885	1.79066	2.19199	3.46376e-06	4.83044e-05	Histone deacetylase [Medicago truncatula]	0	0	GO:1901363;GO:0016772//transferase activity, transferring phosphorus0containing groups;GO:0043167//ion binding;GO:0097159	GO:0006464//protein modification process
Unigene0003023	1.35814	6.20585	2.19199	5.7978e-05	0.000624239	0	0	0	0	0
Unigene0006520	0.39104	1.7868	2.19199	3.46376e-06	4.82948e-05	Mitogen0activated protein kinase [Medicago truncatula]	ko04810//Regulation of actin cytoskeleton;ko04666//Fc gamma R0mediated phagocytosis;ko05200//Pathways in cancer;ko04010//MAPK signaling pathway;ko04114//Oocyte meiosis;ko04722//Neurotrophin signaling pathway;ko05010//Alzheimer's disease;ko04510//Focal adhesion;ko05145//Toxoplasmosis;ko04520//Adherens junction;ko05211//Renal cell carcinoma;ko05131//Shigellosis;ko04370//VEGF signaling pathway;ko043…	GO:0043231//intracellular membrane0bounded organelle	GO:0004702//receptor signaling protein serine/threonine kinase activity;GO:0032550	GO:0006351//transcription, DNA0dependent;GO:0009755//hormone0mediated signaling pathway;GO:0042743//hydrogen peroxide metabolic process;GO:0006605//protein targeting;GO:0009626//plant0type hypersensitive response;GO:0006470//protein dephosphorylation;GO:0009627//systemic acquired resistance
Unigene0013161	0.875904	4.00232	2.19199	5.7978e-05	0.000624335	0	0	0	0	0
Unigene0061185	0.873793	3.99268	2.19199	5.7978e-05	0.000624431	MYB transcription factor [Medicago truncatula]	0	0	GO:0005488//binding	0
Unigene0062316	0.76503	3.4957	2.19199	4.70444e-07	7.62121e-06	PREDICTED: probable receptor0like protein kinase At1g670000like [Cicer arietinum]	0	0	GO:0001871;GO:0004674//protein serine/threonine kinase activity;GO:0032550	GO:0006796//phosphate0containing compound metabolic process;GO:0006464//protein modification process
Unigene0054283	1.10377	5.06938	2.19937	7.60102e-07	1.19355e-05	putative UDP0glucose pyrophosphorylase [Trifolium pratense]	0	0	0	0
Unigene0058752	0.341045	1.56926	2.20205	5.92496e-06	7.92813e-05	0	0	0	0	0
Unigene0082801	0.461247	2.12234	2.20205	5.92496e-06	7.92964e-05	PREDICTED: gibberellin 20beta0dioxygenase 80like [Cicer arietinum]	0	0	0	0
Unigene0049711	1.12002	5.18727	2.21145	2.89992e-07	4.84581e-06	PREDICTED: homeobox0leucine zipper protein HAT70like [Cicer arietinum]	0	GO:0043231//intracellular membrane0bounded organelle	GO:0001071//nucleic acid binding transcription factor activity;GO:0044212//transcription regulatory region DNA binding	GO:0006351//transcription, DNA0dependent
Unigene0027005	0.52707	2.44543	2.21402	1.05124e-05	0.000134034	0	0	0	0	0
Unigene0086293	2.86319	13.2891	2.21455	7.4829e-14	3.54408e-12	PREDICTED: transcription factor bHLH1130like isoform X1 [Cicer arietinum]	0	0	0	0
Unigene0043523	25.3568	119.256	2.23362	0	0	PREDICTED: probable membrane0associated kinase regulator 50like [Cicer arietinum]	0	0	0	0
Unigene0083661	4.80467	22.6454	2.23671	0	0	PREDICTED: long0chain0alcohol oxidase FAO4A0like [Cicer arietinum]	0	0	0	0
Unigene0082387	1.03232	4.88195	2.24158	5.3657e-06	7.23925e-05	0	0	0	0	0
Unigene0085458	7.93015	38.1362	2.26574	0	0	Gb:AAF02129.1 isoform 1 [Theobroma cacao]	0	0	0	0
Unigene0051151	0.770136	3.71239	2.26916	8.3076e-05	0.000859077	PREDICTED: anaphase0promoting complex subunit cdc200like [Cicer arietinum]	ko04120//Ubiquitin mediated proteolysis;ko04110//Cell cycle;ko04114//Oocyte meiosis;ko04111//Cell cycle 0 yeast;ko04113//Meiosis 0 yeast	0	0	0
Unigene0055952	0.914398	4.40779	2.26916	8.3076e-05	0.000858951	0	0	0	0	0
Unigene0015456	0.832556	4.03185	2.27582	1.57772e-05	0.000194061	0	0	0	0	0
Unigene0060871	0.789076	3.82129	2.27582	1.57772e-05	0.000194096	0	0	0	0	0
Unigene0035939	3.47166	17.0375	2.29501	1.08358e-13	4.98055e-12	0	0	0	0	0
Unigene0020242	0.691371	3.40214	2.29891	4.6537e-07	7.54425e-06	F0box protein SKIP19 [Medicago truncatula]	0	0	0	0
Unigene0021880	0.657881	3.23734	2.29891	8.26656e-06	0.000107713	PREDICTED: rhodanese0like domain0containing protein 9, chloroplastic0like isoform X1 [Cicer arietinum]	0	0	0	0
Unigene0032397	0.621997	3.06075	2.29891	2.88656e-05	0.000332184	Ribonuclease T2 [Medicago truncatula]	0	GO:0030312//external encapsulating structure;GO:0016020//membrane	GO:0003676//nucleic acid binding;GO:0016892	GO:0009813//flavonoid biosynthetic process;GO:0009267//cellular response to starvation;GO:0044767;GO:0046942//carboxylic acid transport;GO:0009755//hormone0mediated signaling pathway;GO:0006812//cation transport
Unigene0054293	0.747679	3.67922	2.29891	2.88656e-05	0.000332239	0	0	0	0	0
Unigene0083727	0.259462	1.27677	2.29891	8.26656e-06	0.000107733	U0box domain0containing protein [Medicago truncatula]	0	0	0	0
Unigene0020503	0.327541	1.61178	2.29891	1.78957e-07	3.08839e-06	Ubiquitin and WLM domain0containing protein [Medicago truncatula]	0	0	0	0
Unigene0003013	1.65834	8.23818	2.31258	7.47014e-07	1.17511e-05	0	0	0	0	0
Unigene0037486	2.70983	13.5078	2.31752	1.13661e-10	2.92177e-09	0	0	0	0	0
Unigene0016708	0.670172	3.34065	2.31752	4.90626e-06	6.66044e-05	0	0	0	0	0
Unigene0000435	0.739044	3.69445	2.32163	1.37301e-05	0.000170892	PREDICTED: zinc finger protein ZAT90like [Cicer arietinum]	0	GO:0043231//intracellular membrane0bounded organelle	GO:0043169//cation binding;GO:0001071//nucleic acid binding transcription factor activity;GO:0097159	GO:0006351//transcription, DNA0dependent
Unigene0058094	0.576204	2.88042	2.32163	1.37301e-05	0.000170922	0	0	0	0	0
Unigene0013714	0.757835	3.79579	2.32444	4.6516e-07	7.54259e-06	Synaptotagmin07 [Medicago truncatula]	0	GO:0043231//intracellular membrane0bounded organelle;GO:0044459//plasma membrane part;GO:0005911//cell0cell junction	0	GO:0016192//vesicle0mediated transport;GO:0051707//response to other organism;GO:0007009//plasma membrane organization;GO:0046739//spread of virus in host;GO:0006605//protein targeting;GO:0006950//response to stress
Unigene0052633	0.632064	3.17377	2.32805	5.61978e-05	0.000606284	0	0	0	0	0
Unigene0004057	11.5458	58.3183	2.33658	1.04583e-13	4.82604e-12	0	0	0	0	0
Unigene0045253	1.57692	7.97206	2.33784	2.29372e-13	9.95494e-12	PREDICTED: fructose01,60bisphosphatase, cytosolic0like [Cicer arietinum]	ko00010//Glycolysis / Gluconeogenesis;ko00680//Methane metabolism;ko00030//Pentose phosphate pathway;ko00051//Fructose and mannose metabolism;ko00710//Carbon fixation in photosynthetic organisms;ko04910//Insulin signaling pathway	GO:0043231//intracellular membrane0bounded organelle;GO:0044444//cytoplasmic part	GO:0050308	GO:0005982//starch metabolic process;GO:0009725//response to hormone stimulus;GO:0019318//hexose metabolic process;GO:0009746;GO:0005985//sucrose metabolic process;GO:0006796//phosphate0containing compound metabolic process
Unigene0045382	2.66125	13.4616	2.33868	0	0	Sarcosine oxidase [Medicago truncatula]	0	0	0	0
Unigene0084067	0.518627	2.62501	2.33955	7.85116e-06	0.000102721	0	0	0	0	0
Unigene0050007	1.92885	9.80451	2.3457	3.60952e-09	7.7774e-08	0	0	0	0	0
Unigene0052909	0.750775	3.8264	2.34953	2.3489e-05	0.000276117	0	0	0	0	0
Unigene0053502	0.621997	3.17007	2.34953	2.3489e-05	0.000276071	0	0	0	0	0
Unigene0083514	0.402469	2.05122	2.34953	2.3489e-05	0.000276163	0	0	0	0	0
Unigene0034466	0.411054	2.10154	2.35405	4.82164e-06	6.55827e-05	0	0	0	0	0
Unigene0051090	1.27521	6.51962	2.35405	4.82164e-06	6.557e-05	0	0	0	0	0
Unigene0011406	0.412956	2.11748	2.35829	2.88866e-07	4.8293e-06	PREDICTED: amino0acid permease BAT1 homolog [Cicer arietinum]	0	GO:0043231//intracellular membrane0bounded organelle;GO:0031224//intrinsic to membrane	GO:0015179//L0amino acid transmembrane transporter activity;GO:0016405//CoA0ligase activity;GO:0005310//dicarboxylic acid transmembrane transporter activity;GO:0008324//cation transmembrane transporter activity	GO:0040007//growth;GO:0006835//dicarboxylic acid transport;GO:0015698//inorganic anion transport;GO:0015807//L0amino acid transport;GO:0016129;GO:0010035//response to inorganic substance;GO:0000041//transition metal ion transport;GO:0048528//post0embryonic root development;GO:0010053//root epidermal cell differentiation;GO:0009267//cellular response to starvation
Unigene0006597	0.985392	5.07987	2.36602	1.26472e-05	0.00015854	0	0	0	0	0
Unigene0053137	0.471878	2.45863	2.38137	2.88854e-07	4.83025e-06	PREDICTED: xylogalacturonan beta01,30xylosyltransferase0like [Cicer arietinum]	0	0	0	0
Unigene0084735	0.262445	1.37052	2.38464	4.20186e-05	0.000466904	PREDICTED: uncharacterized mitochondrial protein AtMg008100like [Cicer arietinum]	0	0	0	0
Unigene0040055	1.12516	5.87575	2.38464	4.20186e-05	0.000467052	0	0	0	0	0
Unigene0052453	1.47717	7.71397	2.38464	4.26436e-11	1.14362e-09	0	0	0	0	0
Unigene0061081	0.695825	3.63369	2.38464	4.20186e-05	0.000466978	TdcA10ORF2 protein [Medicago truncatula]	0	0	0	0
Unigene0004238	0.209488	1.10449	2.39844	2.06582e-05	0.000246775	PREDICTED: alpha01,3/1,60mannosyltransferase ALG20like [Cicer arietinum]	ko00510//N0Glycan biosynthesis;ko00513//Various types of N0glycan biosynthesis	0	GO:0000009//alpha01,60mannosyltransferase activity;GO:0004376//glycolipid mannosyltransferase activity	GO:0008152//metabolic process
Unigene0002930	0.921145	4.91055	2.41439	9.66214e-09	1.96522e-07	PREDICTED: probable DNA double0strand break repair Rad50 ATPase0like [Cicer arietinum]	0	0	0	0
Unigene0052742	0.762617	4.08779	2.42229	4.64942e-07	7.5408e-06	0	0	0	0	0
Unigene0018519	0.988177	5.30005	2.42317	1.04583e-13	4.81969e-12	PREDICTED: growth0regulating factor 30like [Cicer arietinum]	0	0	0	0
Unigene0028532	0.928219	5.00264	2.43015	7.98164e-05	0.000828796	0	0	0	0	0
Unigene0048255	0.386318	2.08206	2.43015	7.98164e-05	0.000828673	0	0	0	0	0
Unigene0054168	0.735049	3.96155	2.43015	7.98164e-05	0.000829042	0	0	0	0	0
Unigene0069320	0.563081	3.03473	2.43015	3.00884e-06	4.24162e-05	TdcA10ORF2 protein [Medicago truncatula]	0	0	0	0
Unigene0007889	0.410828	2.21416	2.43015	7.98164e-05	0.000828551	20succinylbenzoate0CoA ligase [Medicago truncatula]	0	GO:0043231//intracellular membrane0bounded organelle;GO:0044444//cytoplasmic part	GO:0003824//catalytic activity	0
Unigene0084072	0.209529	1.12926	2.43015	7.98164e-05	0.000828919	PREDICTED: cyclic phosphodiesterase0like [Cicer arietinum]	0	0	0	0
Unigene0054067	0.74834	4.05823	2.43909	3.45974e-05	0.000391457	0	0	0	0	0
Unigene0056616	0.695825	3.77344	2.43909	3.45974e-05	0.000391521	0	0	0	0	0
Unigene0051029	1.32829	7.23666	2.44575	1.91781e-05	0.000230985	0	0	0	0	0
Unigene0049596	2.11813	11.7135	2.46731	7.45896e-07	1.17388e-05	0	0	0	0	0
Unigene0014526	3.98843	22.1272	2.47192	5.10702e-15	2.63239e-13	pherophorin0dz1 protein [Volvox carteri f. nagariensis]	0	0	0	0
Unigene0006140	0.746755	4.19962	2.49155	7.42534e-06	9.74953e-05	0	0	0	0	0
Unigene0007931	0.878937	4.94299	2.49155	3.07418e-05	0.000351753	0	0	0	0	0
Unigene0008012	0.118971	0.669074	2.49155	6.02942e-05	0.000646099	PREDICTED: folate0biopterin transporter 1, chloroplastic0like isoform X2 [Cicer arietinum]	0	GO:0009526//plastid envelope	GO:0090484;GO:0008517//folic acid transporter activity	GO:0006835//dicarboxylic acid transport
Unigene0008153	0.573772	3.2268	2.49155	6.02942e-05	0.000646198	0	0	0	0	0
Unigene0020214	0.193792	1.08986	2.49155	7.42534e-06	9.75136e-05	PREDICTED: glucan endo01,30beta0glucosidase 70like isoform X2 [Cicer arietinum]	0	0	0	0
Unigene0051842	0.801478	4.50738	2.49155	1.16259e-05	0.000146895	PREDICTED: vegetative cell wall protein gp10like [Cicer arietinum]	0	GO:0043231//intracellular membrane0bounded organelle	0	0
Unigene0052193	0.448158	2.52037	2.49155	3.07418e-05	0.000351696	0	0	0	0	0
Unigene0085510	0.137012	0.77053	2.49155	6.02942e-05	0.000646297	Potassium channel [Medicago truncatula]	0	0	0	0
Unigene0025327	1.19509	6.78099	2.50438	1.34414e-09	3.04611e-08	0	0	0	0	0
Unigene0048774	1.68436	9.63044	2.5154	5.04042e-13	2.00043e-11	Ovate family protein [Arabidopsis thaliana]	0	0	0	0
Unigene0025330	0.355514	2.04933	2.52718	7.40918e-06	9.73196e-05	0	0	0	0	0
Unigene0054678	0.760537	4.38406	2.52718	7.40918e-06	9.73379e-05	0	0	0	0	0
Unigene0013907	0.545182	3.17551	2.54218	2.87524e-05	0.000331208	PREDICTED: nucleobase0ascorbate transporter 60like [Cicer arietinum]	0	0	0	0
Unigene0056994	0.726078	4.22917	2.54218	2.87524e-05	0.000331263	0	0	0	0	0
Unigene0058747	0.214148	1.25451	2.55045	5.02326e-05	0.000548946	U0box domain0containing protein [Medicago truncatula]	0	0	0	0
Unigene0023682	0.355979	2.08538	2.55045	5.02326e-05	0.000549032	PREDICTED: 30ketoacyl0CoA synthase 40like [Cicer arietinum]	0	GO:0043231//intracellular membrane0bounded organelle	GO:0016746//transferase activity, transferring acyl groups	GO:0007275//multicellular organismal development;GO:0006950//response to stress;GO:0006631//fatty acid metabolic process
Unigene0055412	0.410828	2.4067	2.55045	5.02326e-05	0.00054886	0	0	0	0	0
Unigene0003178	3.85088	22.6154	2.55405	0	0	PREDICTED: uncharacterized LOC101208906 [Cucumis sativus]	0	0	0	0
Unigene0027703	0.780932	4.67826	2.5827	1.57816e-08	3.13701e-07	TdcA10ORF2 protein [Medicago truncatula]	0	0	GO:0016740//transferase activity	GO:0008152//metabolic process
Unigene0037158	0.412073	2.48296	2.59109	2.77326e-05	0.000320462	0	0	0	0	0
Unigene0026867	0.649089	3.95456	2.60703	3.00376e-06	4.23531e-05	Beta0glucosidase D7 [Medicago truncatula]	0	0	GO:0016798//hydrolase activity, acting on glycosyl bonds	GO:0008152//metabolic process
Unigene0055115	0.877317	5.34504	2.60703	4.50858e-05	0.000497827	0	0	0	0	0
Unigene0031397	0.809429	4.93143	2.60703	4.50858e-05	0.000497749	0	0	0	0	0
Unigene0060499	0.383054	2.33375	2.60703	4.50858e-05	0.00049767	0	0	0	0	0
Unigene0061237	0.737791	4.5382	2.62084	4.64924e-07	7.544e-06	0	0	0	0	0
Unigene0057462	0.377734	2.33674	2.62906	8.48236e-05	0.000875211	PREDICTED: muscle M0line assembly protein unc0890like [Cicer arietinum]	0	0	0	GO:0000003//reproduction;GO:0009987//cellular process
Unigene0083304	1.96651	12.2113	2.63451	2.22044e-14	1.10783e-12	Myb0like protein J [Medicago truncatula]	0	0	0	0
Unigene0050922	1.54637	9.64772	2.6413	4.64924e-07	7.54226e-06	0	0	0	0	0
Unigene0037812	5.85619	36.6877	2.64726	9.05942e-14	4.23634e-12	0	0	0	0	0
Unigene0049119	1.31646	8.28691	2.65417	7.69606e-13	2.89528e-11	PREDICTED: equilibrative nucleotide transporter 80like isoform X1 [Cicer arietinum]	0	GO:0031224//intrinsic to membrane	GO:0015932//nucleobase0containing compound transmembrane transporter activity	GO:0051234//establishment of localization
Unigene0004183	0.318278	2.01368	2.66148	3.0037e-06	4.23608e-05	PREDICTED: protein TIFY 4B0like isoform X5 [Cicer arietinum]	0	0	0	0
Unigene0010773	0.440506	2.787	2.66148	7.39334e-06	9.71845e-05	Myb26 [Pisum sativum]	0	GO:0043231//intracellular membrane0bounded organelle	GO:0003676//nucleic acid binding	0
Unigene0017069	0.280886	1.77711	2.66148	1.76511e-05	0.000214735	IMP dehydrogenase/GMP reductase, related [Medicago truncatula]	0	0	0	0
Unigene0019696	1.51093	9.55939	2.66148	1.76511e-05	0.000214772	PREDICTED: mediator of RNA polymerase II transcription subunit 120like [Cicer arietinum]	0	0	0	0
Unigene0039914	0.925062	5.85269	2.66148	4.2471e-05	0.000471183	0	0	0	0	0
Unigene0039147	0.668555	4.32382	2.69319	7.15198e-05	0.00075201	unknown [Pisum sativum]	0	0	0	0
Unigene0053235	0.622638	4.02685	2.69319	7.15198e-05	0.000751897	0	0	0	0	0
Unigene0055069	0.252102	1.63045	2.69319	7.15198e-05	0.000752123	0	0	0	0	0
Unigene0051698	0.334319	2.19351	2.71395	3.00368e-06	4.23861e-05	cytochrome P450 [Pisum sativum]	0	0	GO:0016709//oxidoreductase activity, acting on paired donors, with incorporation or reduction of molecular oxygen, NADH or NADPH as one donor, and incorporation of one atom of oxygen;GO:0046914//transition metal ion binding;GO:0046906//tetrapyrrole binding	GO:0044710
Unigene0051107	1.3044	8.55837	2.71395	3.00368e-06	4.23691e-05	Serine carboxypeptidase0like protein [Medicago truncatula]	0	0	GO:0004180//carboxypeptidase activity	0
Unigene0053263	0.46945	3.08013	2.71395	1.14652e-05	0.000145047	copia0type polyprotein [Arabidopsis thaliana]	0	0	0	0
Unigene0084693	0.471465	3.12491	2.72859	2.68172e-05	0.000311271	Receptor0like protein kinase HSL1 [Medicago truncatula]	0	0	0	0
Unigene0031103	0.4972	3.32045	2.73948	3.00368e-06	4.23947e-05	0	0	0	0	0
Unigene0031338	0.944334	6.30654	2.73948	1.7611e-05	0.000214395	0	0	0	0	0
Unigene0008877	1.95408	13.1497	2.75047	1.74305e-13	7.75231e-12	PREDICTED: ABC transporter G family member 150like isoform X1 [Cicer arietinum]	0	0	0	0
Unigene0001668	0.418928	2.82718	2.75459	6.48382e-05	0.000688681	0	0	0	0	0
Unigene0051240	0.36496	2.46297	2.75459	6.48382e-05	0.000688785	GDSL esterase/lipase [Medicago truncatula]	0	0	GO:0016788//hydrolase activity, acting on ester bonds;GO:0097159;GO:1901363	GO:0044238//primary metabolic process;GO:0044260
Unigene0052528	0.747987	5.04786	2.75459	6.48382e-05	0.000688577	0	0	0	0	0
Unigene0059151	0.398313	2.68805	2.75459	7.39236e-06	9.72081e-05	PREDICTED: long chain acyl0CoA synthetase 10like [Glycine max]	ko04146//Peroxisome;ko00071//Fatty acid metabolism;ko03320//PPAR signaling pathway;ko04920//Adipocytokine signaling pathway	GO:0043231//intracellular membrane0bounded organelle	GO:0015645//fatty acid ligase activity	GO:0006631//fatty acid metabolic process;GO:1901576;GO:0044699;GO:0006950//response to stress
Unigene0056939	0.418597	2.85857	2.77166	2.67508e-05	0.000310603	0	0	0	0	0
Unigene0008455	0.649864	4.4542	2.77696	1.76042e-05	0.000214388	PREDICTED: patatin group D020like [Cicer arietinum]	0	0	GO:0003824//catalytic activity	GO:0010073//meristem maintenance;GO:0044238//primary metabolic process
Unigene0057113	0.494038	3.38616	2.77696	1.76042e-05	0.00021435	zinc finger family protein [Arabidopsis lyrata subsp. lyrata]	0	0	GO:0046914//transition metal ion binding	0
Unigene0016062	1.55766	10.731	2.78434	7.39228e-06	9.72253e-05	0	0	0	0	0
Unigene0031274	0.522815	3.60177	2.78434	6.81428e-08	1.2476e-06	zinc ion binding / nucleic acid binding protein [Arabidopsis thaliana]	0	0	0	0
Unigene0052786	1.02481	7.09335	2.79111	1.897e-06	2.77417e-05	0	0	0	0	0
Unigene0008015	0.108831	0.765058	2.81348	4.01594e-05	0.000447451	PREDICTED: serine0rich adhesin for platelets0like [Cicer arietinum]	0	0	0	0
Unigene0056650	0.214621	1.50874	2.81348	6.15058e-05	0.000656471	Leucine0rich repeat family protein / protein kinase family protein [Medicago truncatula]	0	0	0	0
Unigene0059630	0.363205	2.55326	2.81348	6.15058e-05	0.000656671	0	0	0	0	0
Unigene0017617	0.227094	1.59643	2.81348	6.15058e-05	0.000656571	PREDICTED: protein OSB2, chloroplastic0like [Cicer arietinum]	0	GO:0000229;GO:0009536//plastid	0	0
Unigene0012199	1.00027	7.1057	2.82859	1.10545e-07	1.97038e-06	0	0	0	0	0
Unigene0011617	1.8264	13.0727	2.83948	4.72832e-06	6.4401e-05	0	0	0	0	0
Unigene0048690	1.04805	7.61313	2.86079	3.00368e-06	4.23776e-05	0	0	0	0	0
Unigene0053529	0.423626	3.09712	2.87006	5.98542e-05	0.000642071	0	0	0	0	0
Unigene0004995	5.01502	36.746	2.87326	1.2923e-13	5.8782e-12	Iq0domain 31 isoform 2 [Theobroma cacao]	0	0	0	0
Unigene0002473	1.20909	9.04218	2.90275	2.29372e-13	9.94878e-12	PREDICTED: CAP0Gly domain0containing linker protein 10like [Cicer arietinum]	0	GO:0044424//intracellular part	0	0
Unigene0037103	0.735049	5.68396	2.95098	3.9875e-05	0.00044499	Curved DNA0binding protein [Medicago truncatula]	0	0	0	0
Unigene0059701	0.31865	2.46405	2.95098	9.07456e-05	0.000929333	0	0	0	0	0
Unigene0016481	0.141872	1.09706	2.95098	9.07456e-05	0.000929469	PREDICTED: LOW QUALITY PROTEIN: two0component response regulator ARR170like [Cicer arietinum]	ko04075//Plant hormone signal transduction	0	GO:0004871//signal transducer activity;GO:0016772//transferase activity, transferring phosphorus0containing groups	GO:0006351//transcription, DNA0dependent;GO:0006796//phosphate0containing compound metabolic process;GO:0007165//signal transduction
Unigene0060368	0.483683	3.78878	2.9696	2.6687e-05	0.000309913	hypothetical protein MTR_4g101050 [Medicago truncatula]	0	0	0	0
Unigene0006603	0.359746	2.83241	2.97698	5.86422e-05	0.000630615	0	0	0	0	0
Unigene0022590	0.239072	1.8823	2.97698	5.86422e-05	0.000630518	0	0	0	0	0
Unigene0047908	7.07691	56.5503	2.99834	0	0	GATA zinc finger domain0containing protein C1393.08 isoform 2 [Theobroma cacao]	0	0	0	0
Unigene0050081	0.141872	1.14693	3.01512	8.668e-05	0.000893313	PREDICTED: PI0PLC X domain0containing protein At5g671300like [Cicer arietinum]	0	0	0	0
Unigene0003536	1.4801	12.2256	3.04614	1.75976e-05	0.000214344	0	0	0	0	0
Unigene0084515	0.956287	7.99977	3.06444	6.81428e-08	1.24793e-06	0	0	0	0	0
Unigene0006474	0.983864	8.25023	3.0679	1.34414e-09	3.0471e-08	PREDICTED: corepressor interacting with RBPJ 10like [Cicer arietinum]	0	0	0	GO:0007275//multicellular organismal development
Unigene0026339	0.0901154	0.76019	3.07652	8.47088e-05	0.000874413	Histone0lysine N0methyltransferase SETD1B [Medicago truncatula]	0	0	0	0
Unigene0034707	0.515091	4.34518	3.07652	2.66854e-05	0.000309946	0	0	0	0	0
Unigene0052417	0.518035	4.37001	3.07652	8.47088e-05	0.000874284	0	0	0	0	0
Unigene0056205	0.397034	3.34928	3.07652	3.98416e-05	0.000444688	reverse transcriptase family member [Glycine max]	0	0	0	0
Unigene0014842	0.243263	2.05211	3.07652	3.98416e-05	0.000444759	PREDICTED: Down syndrome critical region protein 3 homolog isoform X2 [Cicer arietinum]	0	GO:0012505//endomembrane system;GO:0043231//intracellular membrane0bounded organelle	0	GO:0044765;GO:0009648//photoperiodism;GO:0016192//vesicle0mediated transport;GO:0015031//protein transport
Unigene0044902	14.1768	121.581	3.10031	1.1402e-12	4.09169e-11	PREDICTED: F0box/kelch0repeat protein At1g233900like [Cicer arietinum]	0	0	0	0
Unigene0053173	0.710471	6.19313	3.12382	5.83084e-05	0.000627218	gag/pol polyprotein [Pisum sativum]	0	0	GO:0003824//catalytic activity	GO:0043170;GO:0044238//primary metabolic process
Unigene0025769	0.294338	2.58642	3.13541	8.37582e-05	0.00086511	Histone deacetylase [Medicago truncatula]	0	0	0	0
Unigene0009741	2.4568	22.3945	3.18829	2.22044e-14	1.10704e-12	anther0specific protein [Pisum sativum]	0	0	GO:0043169//cation binding	0
Unigene0084739	0.426952	3.90179	3.19199	3.98378e-05	0.000444788	PREDICTED: uncharacterized protein LOC100784489 [Glycine max]	0	0	0	0
Unigene0005632	0.233349	2.21453	3.24644	1.75976e-05	0.000214381	PREDICTED: protein IQ0DOMAIN 140like [Cicer arietinum]	0	0	0	0
Unigene0048925	0.50225	4.76646	3.24644	8.3085e-05	0.000858917	PREDICTED: peptide transporter PTR30A0like [Cicer arietinum]	0	0	0	GO:0051234//establishment of localization
Unigene0055622	0.329259	3.24047	3.29891	3.98374e-05	0.000444854	0	0	0	0	0
Unigene0014421	0.413535	4.06989	3.29891	1.78921e-07	3.08929e-06	PREDICTED: uncharacterized acetyltransferase At3g502800like [Cicer arietinum]	0	0	GO:0016747//transferase activity, transferring acyl groups other than amino0acyl groups	0
Unigene0037814	24.0805	240.905	3.32253	7.28972e-13	2.75871e-11	0	0	0	0	0
Unigene0053501	0.121068	1.22556	3.33955	5.82676e-05	0.000626876	Os03g0140900 [Oryza sativa Japonica Group]	0	0	0	0
Unigene0002925	0.958599	10.2044	3.41212	2.66852e-05	0.000309995	0	0	0	0	0
Unigene0063714	0.256671	2.7426	3.41755	5.82668e-05	0.000626963	Poly [Medicago truncatula]	0	0	0	0
Unigene0052345	0.486352	5.60708	3.52718	5.82666e-05	0.000627057	Anthocyanidin 30O0glucosyltransferase [Medicago truncatula]	0	0	GO:0016758//transferase activity, transferring hexosyl groups	0
Unigene0016399	0.0727285	0.843589	3.53595	8.28916e-05	0.00085755	Luc70like protein [Medicago truncatula]	0	0	0	0
Unigene0065662	0.231265	2.73126	3.56194	5.82666e-05	0.000627154	PREDICTED: probably inactive leucine0rich repeat receptor0like protein kinase At1g506100like [Cicer arietinum]	0	0	0	0
Unigene0050309	1.17263	14.0989	3.58777	8.1974e-10	1.90265e-08	PREDICTED: probable sulfate transporter 3.40like [Cicer arietinum]	0	0	0	0
Unigene0053657	0.153915	1.87545	3.60703	3.98372e-05	0.000445065	PREDICTED: amino0acid permease BAT1 homolog isoform X1 [Cicer arietinum]	0	GO:0031224//intrinsic to membrane	GO:0046943//carboxylic acid transmembrane transporter activity	GO:0044763;GO:0006865//amino acid transport
Unigene0037813	13.7177	172.74	3.65449	0	0	0	0	0	0	0
Unigene0057883	0.278086	3.5188	3.66148	3.98372e-05	0.000444994	PREDICTED: serine/threonine0protein phosphatase 7 long form homolog [Cicer arietinum]	0	0	0	0
Unigene0047545	0.146456	2.0591	3.81348	8.28896e-05	0.000857656	Protein RUPTURED POLLEN GRAIN [Medicago truncatula]	0	0	0	0
Unigene0014654	0.125447	1.79312	3.83733	3.98372e-05	0.000444923	PREDICTED: probable sulfate transporter 3.40like [Cicer arietinum]	0	GO:0031224//intrinsic to membrane	GO:0015291//secondary active transmembrane transporter activity;GO:0015103//inorganic anion transmembrane transporter activity	GO:0044763;GO:0015698//inorganic anion transport
Unigene0051053	0.307309	4.42865	3.84911	8.28894e-05	0.000858035	Zinc finger0like protein [Medicago truncatula]	0	GO:0043231//intracellular membrane0bounded organelle	GO:0043169//cation binding;GO:0097159;GO:0001071//nucleic acid binding transcription factor activity	GO:0009888//tissue development;GO:0010051//xylem and phloem pattern formation;GO:0044767;GO:0006351//transcription, DNA0dependent;GO:0022622
Unigene0054169	0.400811	6.24998	3.96286	4.72832e-06	6.44135e-05	Poly [Medicago truncatula]	0	GO:0043231//intracellular membrane0bounded organelle	GO:0016763//transferase activity, transferring pentosyl groups	GO:0006486//protein glycosylation
[truncated: 81 more rows]

## Sheet: Dp-vs-Vp.GeneDiff
GeneID	DP-RPKM	VP-RPKM	log2 Ratio(VP/DP)	P-value	FDR	Description	Pathway	GO Component	GO Function	GO Process
Unigene0024503	188.727	0.001	-17.5259	0	0	Cell wall0associated hydrolase, partial [Medicago truncatula]	0	0	0	0
Unigene0044503	167.318	0.001	-17.3522	2.77098e-268	3.32627e-266	ATP synthase subunit alpha [Medicago truncatula]	0	0	0	0
Unigene0045024	126.488	0.001	-16.9486	0	0	hypothetical protein M569_00248, partial [Genlisea aurea]	0	0	0	0
Unigene0046085	89.9346	0.001	-16.4566	1.20079e-182	1.29416e-180	CYC1 [Pisum sativum]	0	0	0	0
Unigene0046854	89.4286	0.001	-16.4484	8.04544e-249	9.4301e-247	Cell wall0associated hydrolase [Medicago truncatula]	0	0	0	0
Unigene0045451	78.3637	0.001	-16.2579	2.24496e-174	2.37901e-172	Cell wall0associated hydrolase, partial [Medicago truncatula]	0	0	0	0
Unigene0018426	48.2407	0.001	-15.558	0	0	CYC1 [Pisum sativum]	0	0	0	0
Unigene0047384	41.2457	0.001	-15.332	5.954e-72	4.77026e-70	0	0	0	0	0
Unigene0008100	17.2737	0.001	-14.0763	5.68004e-35	3.28729e-33	0	0	0	0	0
Unigene0049147	14.3639	0.001	-13.8102	2.68476e-41	1.71487e-39	SAUR family protein [Medicago truncatula]	0	GO:0043231//intracellular membrane0bounded organelle	0	GO:0009725//response to hormone stimulus
Unigene0049896	11.9148	0.001	-13.5405	3.04938e-34	1.74022e-32	0	0	0	0	0
Unigene0023086	8.5435	0.001	-13.0606	3.4763e-18	1.34611e-16	PREDICTED: uncharacterized protein LOC101508391 [Cicer arietinum]	0	0	0	0
Unigene0052842	6.63337	0.001	-12.6955	2.3988e-12	5.77495e-11	0	0	0	0	0
Unigene0052634	6.47543	0.001	-12.6608	6.49916e-10	1.17622e-08	0	0	0	0	0
Unigene0053970	5.80648	0.001	-12.5034	3.27992e-08	5.06449e-07	0	0	0	0	0
Unigene0051145	5.5287	0.001	-12.4327	2.09646e-37	1.27034e-35	Os01g0915000 [Oryza sativa Japonica Group]	0	0	0	0
Unigene0051452	5.39619	0.001	-12.3977	9.45326e-07	1.22313e-05	0	0	0	0	0
Unigene0063380	5.25712	0.001	-12.3601	1.28781e-11	2.76818e-10	predicted protein [Populus trichocarpa]	0	0	0	0
Unigene0015776	4.38658	0.001	-12.0989	5.74314e-08	8.61384e-07	NTH1 [Pisum sativum]	0	0	GO:0070011	GO:0019538//protein metabolic process
Unigene0050257	4.24252	0.001	-12.0507	2.72458e-05	0.000278838	0	0	0	0	0
Unigene0061308	4.17198	0.001	-12.0265	1.13801e-09	2.02276e-08	beta glucosidase 19 [Arabidopsis thaliana]	0	GO:0005911//cell0cell junction;GO:0009536//plastid;GO:0042579//microbody;GO:0044432//endoplasmic reticulum part	GO:0046914//transition metal ion binding;GO:0008422//beta0glucosidase activity;GO:0016788//hydrolase activity, acting on ester bonds;GO:0019899//enzyme binding	GO:0000003//reproduction;GO:0006066//alcohol metabolic process;GO:0010118//stomatal movement;GO:0048878//chemical homeostasis;GO:0010208//pollen wall assembly;GO:0006996//organelle organization;GO:0006970//response to osmotic stress;GO:0044238//primary metabolic process;GO:0043623//cellular protein complex assembly;GO:0009409//response to cold;GO:0009738//abscisic acid mediated signaling pathway;…
Unigene0055408	3.97297	0.001	-11.956	4.45178e-22	1.96169e-20	Dynein light chain [Medicago truncatula]	0	0	0	0
Unigene0013087	3.84861	0.001	-11.9101	3.08326e-07	4.25333e-06	Em protein [Brassica napus]	0	GO:0044424//intracellular part	0	GO:0009725//response to hormone stimulus;GO:0048507//meristem development;GO:0009756//carbohydrate mediated signaling;GO:0032446//protein modification by small protein conjugation;GO:0009409//response to cold;GO:0009908//flower development;GO:0010876;GO:0006721//terpenoid metabolic process;GO:0009639//response to red or far red light
Unigene0056653	3.76836	0.001	-11.8797	3.48914e-09	5.94674e-08	0	0	0	0	0
Unigene0060903	3.74759	0.001	-11.8717	8.88644e-06	9.84722e-05	0	0	0	0	0
Unigene0055387	3.72259	0.001	-11.8621	8.3536e-05	0.000772997	Phytochrome A [Medicago truncatula]	ko04712//Circadian rhythm 0 plant	0	0	0
Unigene0001736	3.65058	0.001	-11.8339	1.65527e-06	2.06052e-05	0	0	0	0	0
Unigene0055316	3.57853	0.001	-11.8052	1.65527e-06	2.06089e-05	0	0	0	0	0
Unigene0057159	3.49097	0.001	-11.7694	3.07192e-16	1.10189e-14	0	0	0	0	0
Unigene0056023	3.41759	0.001	-11.7388	2.72458e-05	0.000278879	0	0	0	0	0
Unigene0012330	3.40447	0.001	-11.7332	3.48914e-09	5.9482e-08	late embryogenesis abundant protein M17 [Arabidopsis thaliana]	0	0	0	GO:0009987//cellular process;GO:0048856//anatomical structure development;GO:0007275//multicellular organismal development;GO:0003006//developmental process involved in reproduction
Unigene0012331	3.35223	0.001	-11.7109	2.89838e-06	3.47441e-05	late embryogenesis abundant protein M17 [Arabidopsis thaliana]	0	0	0	GO:0048316//seed development;GO:0044763;GO:0009790//embryo development
Unigene0022745	3.33002	0.001	-11.7013	5.72204e-17	2.12133e-15	NTH1 [Pisum sativum]	0	0	GO:0008233//peptidase activity	0
Unigene0055661	3.28464	0.001	-11.6815	5.74314e-08	8.6157e-07	0	0	0	0	0
Unigene0049292	3.28237	0.001	-11.6805	8.88644e-06	9.83939e-05	cold tolerant protein [Cicer microphyllum]	0	0	0	0
Unigene0059260	3.17423	0.001	-11.6322	9.45326e-07	1.2229e-05	0	0	0	0	0
Unigene0052973	3.10716	0.001	-11.6014	8.3536e-05	0.000772689	0	0	0	0	0
Unigene0012714	2.90784	0.001	-11.5057	8.3536e-05	0.000772483	0	0	0	0	0
Unigene0048195	2.88451	0.001	-11.4941	8.88644e-06	9.84095e-05	PREDICTED: UDP0arabinopyranose mutase 30like [Cicer arietinum]	0	0	GO:0035251//UDP0glucosyltransferase activity;GO:0016853//isomerase activity	GO:0030243//cellulose metabolic process
Unigene0052852	2.77154	0.001	-11.4365	3.27992e-08	5.06674e-07	0	0	0	0	0
Unigene0014467	2.76237	0.001	-11.4317	5.07506e-06	5.8675e-05	defensin [Brassica napus]	0	GO:0030312//external encapsulating structure	0	GO:0000160//two0component signal transduction system (phosphorelay);GO:0051707//response to other organism;GO:0009611//response to wounding;GO:0014070//response to organic cyclic compound;GO:0010476//gibberellin mediated signaling pathway;GO:0009685//gibberellin metabolic process
Unigene0056325	2.73182	0.001	-11.4156	3.08326e-07	4.25502e-06	0	0	0	0	0
Unigene0086778	2.63287	0.001	-11.3624	1.13801e-09	2.02379e-08	PREDICTED: cyclin0dependent kinase 120like [Cicer arietinum]	0	0	0	0
Unigene0070004	2.56859	0.001	-11.3268	8.3536e-05	0.000773716	aminophospholipid ATPase [Populus trichocarpa]	0	GO:0031224//intrinsic to membrane	GO:0005548//phospholipid transporter activity;GO:0046872//metal ion binding;GO:0008324//cation transmembrane transporter activity;GO:0003824//catalytic activity;GO:0032550	GO:0006869//lipid transport;GO:0006811//ion transport
Unigene0037468	2.55198	0.001	-11.3174	8.88644e-06	9.84565e-05	0	0	0	0	0
Unigene0036318	2.52561	0.001	-11.3024	2.72458e-05	0.000278715	0	0	0	0	0
Unigene0047663	2.50497	0.001	-11.2906	6.91372e-11	1.36053e-09	Proline0rich protein [Medicago truncatula]	0	0	0	0
Unigene0070876	2.50277	0.001	-11.2893	4.77076e-05	0.000466313	0	0	0	0	0
Unigene0024263	2.4849	0.001	-11.279	1.00562e-07	1.47059e-06	C2H2 zinc finger protein [Medicago truncatula]	0	0	0	0
Unigene0070762	2.45016	0.001	-11.2587	4.77076e-05	0.000466051	0	0	0	0	0
Unigene0057509	2.40148	0.001	-11.2297	1.65527e-06	2.05978e-05	PREDICTED: peptidyl0prolyl cis0trans isomerase FKBP18, chloroplastic0like isoform X1 [Cicer arietinum]	0	0	0	0
Unigene0005767	2.36347	0.001	-11.2067	1.76085e-07	2.50093e-06	PREDICTED: serine/threonine0protein kinase HT10like [Cicer arietinum]	0	0	0	0
Unigene0034740	2.33951	0.001	-11.192	1.65527e-06	2.06015e-05	0	0	0	0	0
Unigene0086943	2.30481	0.001	-11.1704	8.88644e-06	9.84408e-05	0	0	0	0	0
Unigene0056375	2.28182	0.001	-11.156	1.13801e-09	2.02224e-08	Auxin0induced protein 6B [Medicago truncatula]	ko04075//Plant hormone signal transduction	GO:0043231//intracellular membrane0bounded organelle	0	GO:0009725//response to hormone stimulus
Unigene0055063	2.24203	0.001	-11.1306	2.89838e-06	3.47322e-05	PREDICTED: uncharacterized protein LOC101496136 [Cicer arietinum]	0	0	0	0
Unigene0012420	2.20286	0.001	-11.1052	5.39878e-07	7.21319e-06	gamma0gliadin, partial [Lophopyrum elongatum]	0	0	0	0
Unigene0003500	2.19651	0.001	-11.101	5.07506e-06	5.86848e-05	0	0	0	0	0
Unigene0069645	2.1642	0.001	-11.0796	4.77076e-05	0.000466182	retrotransposon0like protein [Musa acuminata]	ko03018//RNA degradation;ko03008//Ribosome biogenesis in eukaryotes	0	GO:0005488//binding	0
Unigene0057281	2.15382	0.001	-11.0727	5.07506e-06	5.86263e-05	0	0	0	0	0
Unigene0057487	2.14958	0.001	-11.0698	2.89838e-06	3.47262e-05	hypothetical protein MTR_4g097020 [Medicago truncatula]	0	0	0	0
Unigene0068579	2.06036	0.001	-11.0087	3.27992e-08	5.06561e-07	0	0	0	0	0
Unigene0011986	2.05189	0.001	-11.0027	5.07506e-06	5.86653e-05	Cysteine proteinase [Medicago truncatula]	0	0	0	0
Unigene0063232	2.03831	0.001	-10.9932	8.88644e-06	9.84252e-05	0	0	0	0	0
Unigene0062202	2.03265	0.001	-10.9891	7.82384e-13	2.03557e-11	Ribosomal protein L5 [Medicago truncatula]	ko03010//Ribosome;ko00190//Oxidative phosphorylation;ko05016//Huntington's disease;ko05012//Parkinson's disease;ko05010//Alzheimer's disease;ko00020//Citrate cycle (TCA cycle)	GO:0030529//ribonucleoprotein complex;GO:0009536//plastid	GO:0003723//RNA binding;GO:0005198//structural molecule activity	GO:0010467//gene expression
Unigene0008341	2.00962	0.001	-10.9727	3.08326e-07	4.25586e-06	hypothetical protein EMIHUDRAFT_102428 [Emiliania huxleyi CCMP1516]	0	0	0	0
Unigene0015720	1.99751	0.001	-10.964	5.39878e-07	7.21457e-06	0	0	0	0	0
Unigene0010708	1.99721	0.001	-10.9638	2.89838e-06	3.47501e-05	0	0	0	0	0
Unigene0065003	1.96859	0.001	-10.9429	3.71168e-10	6.8546e-09	Polygalacturonase0like protein [Medicago truncatula]	0	0	0	0
Unigene0063013	1.96302	0.001	-10.9389	5.07506e-06	5.86555e-05	0	0	0	0	0
Unigene0082737	1.8935	0.001	-10.8868	1.36996e-12	3.42848e-11	0	0	0	0	0
Unigene0055126	1.89225	0.001	-10.8859	5.07506e-06	5.86945e-05	hypothetical protein MTR_2g103750 [Medicago truncatula]	0	0	0	0
Unigene0057518	1.88453	0.001	-10.88	2.72458e-05	0.000278756	0	0	0	0	0
Unigene0065692	1.88405	0.001	-10.8796	8.3536e-05	0.000773202	0	0	0	0	0
Unigene0055245	1.81642	0.001	-10.8269	5.07506e-06	5.87043e-05	PREDICTED: uncharacterized LOC101220568 [Cucumis sativus]	0	0	0	0
Unigene0056449	1.80371	0.001	-10.8168	2.89838e-06	3.47381e-05	hypothetical protein MTR_066s1004 [Medicago truncatula]	0	0	0	0
Unigene0057228	1.76986	0.001	-10.7894	4.77076e-05	0.000465986	0	0	0	0	0
Unigene0054510	1.74712	0.001	-10.7708	4.77076e-05	0.000466117	0	0	0	0	0
Unigene0056159	1.63112	0.001	-10.6716	2.72458e-05	0.000278797	PREDICTED: enzymatic polyprotein0like [Cicer arietinum]	0	0	0	0
Unigene0019903	1.62117	0.001	-10.6628	9.45326e-07	1.22267e-05	PREDICTED: zinc finger protein MAGPIE0like isoform X1 [Cicer arietinum]	0	0	0	0
Unigene0059692	1.59356	0.001	-10.638	4.77076e-05	0.00046592	0	0	0	0	0
Unigene0058328	1.54968	0.001	-10.5978	1.65527e-06	2.05941e-05	PREDICTED: glycylpeptide N0tetradecanoyltransferase 10like isoform 1 [Glycine max]	0	GO:0044444//cytoplasmic part;GO:0030529//ribonucleoprotein complex	GO:0016410//N0acyltransferase activity	GO:0035966;GO:0010016//shoot morphogenesis;GO:0043094;GO:0006498//N0terminal protein lipidation;GO:0019941//modification0dependent protein catabolic process;GO:0019932//second0messenger0mediated signaling;GO:0043248//proteasome assembly
Unigene0054519	1.52506	0.001	-10.5746	4.77076e-05	0.000466378	0	0	0	0	0
Unigene0054728	1.49337	0.001	-10.5444	8.3536e-05	0.000772791	0	0	0	0	0
Unigene0061806	1.45667	0.001	-10.5085	8.3536e-05	0.000772894	0	0	0	0	0
Unigene0021123	1.43898	0.001	-10.4908	5.07506e-06	5.86166e-05	PREDICTED: myb0related protein Myb40like isoform X1 [Cicer arietinum]	0	0	0	0
Unigene0063697	1.42964	0.001	-10.4814	8.3536e-05	0.000773614	0	0	0	0	0
Unigene0062902	1.39471	0.001	-10.4457	1.55602e-05	0.000166259	Aspartic proteinase nepenthesin01 [Medicago truncatula]	0	0	GO:0016787//hydrolase activity	GO:0044238//primary metabolic process;GO:0043170
Unigene0037050	1.39345	0.001	-10.4444	8.3536e-05	0.000773511	0	0	0	0	0
Unigene0054942	1.34704	0.001	-10.3956	1.55602e-05	0.000166208	0	0	0	0	0
Unigene0045029	145.491	0.113028	-10.33	0	0	unknow protein [Oryza sativa Japonica Group]	0	GO:0032991//macromolecular complex;GO:0044424//intracellular part;GO:0044425//membrane part	GO:0016820//hydrolase activity, acting on acid anhydrides, catalyzing transmembrane movement of substances	GO:0071704;GO:0015992//proton transport;GO:0044237//cellular metabolic process;GO:0044710;GO:0044238//primary metabolic process
Unigene0031177	1.24324	0.001	-10.2799	1.13801e-09	2.02172e-08	Myb0like protein A [Medicago truncatula]	0	0	0	0
Unigene0034685	1.1855	0.001	-10.2113	8.3536e-05	0.000773099	0	0	0	0	0
Unigene0059572	1.15356	0.001	-10.1719	8.3536e-05	0.000773305	PREDICTED: omega03 fatty acid desaturase, chloroplastic0like [Cicer arietinum]	ko01040//Biosynthesis of unsaturated fatty acids	GO:0009536//plastid	GO:0016491//oxidoreductase activity	GO:0006631//fatty acid metabolic process
Unigene0000755	1.14166	0.001	-10.1569	3.08326e-07	4.25418e-06	F0box protein [Medicago truncatula]	0	0	0	0
Unigene0030935	1.13469	0.001	-10.1481	2.72458e-05	0.00027892	Omega0hydroxypalmitate O0feruloyl transferase [Medicago truncatula]	0	0	GO:0016740//transferase activity	0
Unigene0002211	1.10802	0.001	-10.1138	5.07506e-06	5.86361e-05	MTD1 [Medicago truncatula]	0	0	0	0
Unigene0017710	1.09457	0.001	-10.0961	6.10948e-09	1.01664e-07	PREDICTED: zinc finger protein JAGGED0like [Cicer arietinum]	0	0	0	GO:0048827//phyllome development;GO:0048437//floral organ development
Unigene0037484	0.97418	0.001	-9.92804	8.3536e-05	0.000772586	0	0	0	0	0
Unigene0001802	0.957153	0.001	-9.90261	1.76085e-07	2.50144e-06	PREDICTED: zinc finger protein 30like [Cicer arietinum]	0	0	0	GO:0044260;GO:0003006//developmental process involved in reproduction;GO:0010033//response to organic substance;GO:0009913//epidermal cell differentiation;GO:0009058//biosynthetic process;GO:0007165//signal transduction;GO:0044238//primary metabolic process;GO:0016043//cellular component organization;GO:0044767;GO:0006952//defense response
Unigene0000504	0.951329	0.001	-9.8938	8.3536e-05	0.000773408	PREDICTED: H/ACA ribonucleoprotein complex non0core subunit NAF10like [Cicer arietinum]	0	0	0	0
Unigene0023202	0.936354	0.001	-9.87091	5.07506e-06	5.86069e-05	0	0	0	0	0
Unigene0033905	0.848652	0.001	-9.72903	8.3536e-05	0.000773819	PREDICTED: protein FAR10RELATED SEQUENCE 110like isoform X1 [Cicer arietinum]	0	GO:0043231//intracellular membrane0bounded organelle	GO:0046914//transition metal ion binding	GO:0009416//response to light stimulus
Unigene0056359	0.83086	0.001	-9.69846	4.77076e-05	0.000466444	polyprotein [Arabidopsis thaliana]	0	0	0	0
Unigene0084237	0.788499	0.001	-9.62296	1.13801e-09	2.02327e-08	PREDICTED: sister chromatid cohesion 1 protein 10like [Cicer arietinum]	0	0	0	0
Unigene0020862	0.757044	0.001	-9.56423	1.65527e-06	2.06125e-05	0	0	0	0	0
Unigene0005404	0.6894	0.001	-9.4292	1.55602e-05	0.000166183	20hydroxy060oxononadienedioate/20hydroxy060 oxononatrienedioate hydrolase [Medicago truncatula]	0	0	0	0
Unigene0009221	0.677917	0.001	-9.40497	5.07506e-06	5.86458e-05	Os12g0577200 [Oryza sativa Japonica Group]	0	GO:0043231//intracellular membrane0bounded organelle	0	0
Unigene0017772	0.477137	0.001	-8.89826	4.77076e-05	0.000466247	PREDICTED: probable anion transporter 3, chloroplastic0like [Cicer arietinum]	0	0	0	0
Unigene0045659	86.3751	0.335315	-8.00895	6.37372e-163	6.64308e-161	0	0	0	0	0
Unigene0005616	29.8982	0.121933	-7.93783	6.16976e-155	6.33565e-153	PREDICTED: serine/threonine0protein kinase HT10like [Cicer arietinum]	0	0	0	0
Unigene0012552	0.197508	0.001	-7.62577	1.55602e-05	0.000166234	Alpha/beta0Hydrolases superfamily protein isoform 5 [Theobroma cacao]	0	0	GO:0003824//catalytic activity	GO:0009987//cellular process;GO:0008152//metabolic process
Unigene0048351	13.135	0.0817289	-7.32835	1.46368e-100	1.32518e-98	keeled wing [Pisum sativum]	0	0	0	0
Unigene0041309	80.9259	0.632008	-7.00052	4.29532e-158	4.43042e-156	dormancy0associated protein [Pisum sativum]	ko03040//Spliceosome	0	0	0
Unigene0002793	14.5799	0.151081	-6.59251	2.13568e-59	1.58015e-57	Os03g0665700 [Oryza sativa Japonica Group]	0	0	0	0
Unigene0018425	59.3275	0.628353	-6.56098	0	0	LST1 [Pisum sativum]	0	GO:0043231//intracellular membrane0bounded organelle	GO:0003676//nucleic acid binding;GO:0001071//nucleic acid binding transcription factor activity	GO:0009791//post0embryonic development;GO:0006351//transcription, DNA0dependent
Unigene0086129	19.315	0.207412	-6.54108	3.08046e-57	2.24812e-55	PREDICTED: auxin0induced protein 6B0like [Glycine max]	ko04075//Plant hormone signal transduction	0	0	0
Unigene0082671	26.4127	0.366354	-6.17185	1.39328e-86	1.19907e-84	PREDICTED: cyclin0dependent kinase 120like [Cicer arietinum]	0	0	0	0
Unigene0003963	154.286	2.56232	-5.91202	0	0	PREDICTED: probable caffeoyl0CoA O0methyltransferase At4g262200like [Glycine max]	0	GO:0044444//cytoplasmic part	GO:0008171//O0methyltransferase activity	GO:0008152//metabolic process
Unigene0051867	11.332	0.22028	-5.68492	9.74166e-31	5.22933e-29	0	0	0	0	0
Unigene0043355	87.6051	1.74106	-5.65298	1.9206e-174	2.03838e-172	glycine0rich protein [Citrus unshiu]	0	0	0	0
Unigene0047509	38.1145	0.778797	-5.61295	2.89248e-85	2.47096e-83	Limonoid UDP0glucosyltransferase [Medicago truncatula]	0	0	0	0
Unigene0015281	8.21479	0.195329	-5.39424	6.90592e-13	1.81096e-11	Chalcone synthase [Medicago truncatula]	ko04712//Circadian rhythm 0 plant;ko00941//Flavonoid biosynthesis	0	GO:0016747//transferase activity, transferring acyl groups other than amino0acyl groups;GO:0046914//transition metal ion binding;GO:0016702//oxidoreductase activity, acting on single donors with incorporation of molecular oxygen, incorporation of two atoms of oxygen	GO:0006633//fatty acid biosynthetic process
Unigene0005405	3.72151	0.099108	-5.23074	5.31548e-22	2.33636e-20	20hydroxy060oxononadienedioate/20hydroxy060 oxononatrienedioate hydrolase [Medicago truncatula]	0	0	0	0
Unigene0043861	148.06	4.07663	-5.18266	0	0	hypothetical protein MTR_4g103970 [Medicago truncatula]	0	GO:0043231//intracellular membrane0bounded organelle	0	0
Unigene0005768	10.4087	0.298058	-5.12605	2.33314e-20	9.75031e-19	PREDICTED: serine/threonine0protein kinase HT10like [Cicer arietinum]	0	0	0	0
Unigene0004015	57.6816	1.77148	-5.02509	2.28004e-125	2.18956e-123	proline0 and leucine0rich protein [Pisum sativum]	0	0	0	0
Unigene0058453	2.5937	0.08223	-4.9792	1.34384e-09	2.37107e-08	chalcone00flavonone isomerase 1B01 [Glycine max]	ko00941//Flavonoid biosynthesis	0	GO:0016872//intramolecular lyase activity	GO:0009812//flavonoid metabolic process
Unigene0005779	2.95875	0.0945537	-4.96771	1.26234e-26	6.21997e-25	PREDICTED: peptide transporter PTR20like [Glycine max]	0	0	0	0
Unigene0044155	5.64278	0.185523	-4.92674	1.78497e-50	1.23288e-48	beta0fructofuranosidase; cell wall invertase I; fructosidase [Vicia faba var. minor]	ko00500//Starch and sucrose metabolism;ko00052//Galactose metabolism	0	0	0
Unigene0054883	4.85657	0.165815	-4.87229	6.73708e-09	1.11707e-07	0	0	0	0	0
Unigene0084308	1.52988	0.0582033	-4.71617	5.7347e-08	8.60675e-07	0	0	0	0	0
Unigene0015454	1.60772	0.0639034	-4.65298	2.64192e-14	8.51173e-13	0	0	0	0	0
Unigene0013206	1.6807	0.0678166	-4.63128	1.66652e-07	2.37909e-06	0	0	0	0	0
Unigene0060372	3.09695	0.124962	-4.63128	4.49638e-14	1.42102e-12	RNA0directed DNA polymerase (Reverse transcriptase) [Medicago truncatula]	0	0	0	0
Unigene0048312	3.67525	0.148297	-4.63128	1.66652e-07	2.37861e-06	PREDICTED: UDP0arabinopyranose mutase 30like [Glycine max]	0	GO:0043231//intracellular membrane0bounded organelle;GO:0005911//cell0cell junction;GO:0044444//cytoplasmic part	GO:0035251//UDP0glucosyltransferase activity;GO:0016866//intramolecular transferase activity	GO:0030243//cellulose metabolic process;GO:0009225//nucleotide0sugar metabolic process
Unigene0084870	1.68974	0.0714282	-4.56417	2.21108e-13	6.38764e-12	PREDICTED: probable protein phosphatase 2C 470like [Cicer arietinum]	0	0	0	0
Unigene0020935	5.88635	0.251487	-4.54882	1.62739e-37	9.86967e-36	0	0	0	0	0
Unigene0054270	2.9006	0.130926	-4.46953	1.8373e-12	4.48836e-11	PREDICTED: stem 28 kDa glycoprotein0like [Cicer arietinum]	0	0	GO:0016791//phosphatase activity	0
Unigene0011778	12.5972	0.585988	-4.42609	6.02294e-45	3.97851e-43	MADS box protein M2 [Pisum sativum]	0	0	0	0
Unigene0055750	3.53716	0.174442	-4.34177	4.00998e-06	4.70645e-05	PREDICTED: protein FANTASTIC FOUR 30like [Cicer arietinum]	0	0	0	0
Unigene0005766	70.5706	3.52382	-4.32385	2.60716e-196	2.87213e-194	Os05g0178300 [Oryza sativa Japonica Group]	0	0	0	0
Unigene0083701	6.64936	0.332544	-4.3216	2.6815e-41	1.71436e-39	Gibberellin 20oxidase [Medicago truncatula]	0	0	0	0
Unigene0005765	18.7068	0.958044	-4.28733	1.92087e-64	1.4632e-62	Os05g0178300 [Oryza sativa Japonica Group]	0	0	0	0
Unigene0050528	4.43389	0.227076	-4.28733	1.48158e-25	7.12869e-24	0	0	0	0	0
Unigene0028126	4.04574	0.209209	-4.27339	1.90566e-20	7.9782e-19	unnamed protein product [Arabidopsis thaliana]	0	0	0	0
Unigene0082263	9.30331	0.491149	-4.24351	1.96019e-43	1.28265e-41	PREDICTED: dual specificity protein phosphatase 80like [Cicer arietinum]	0	0	0	0
Unigene0061114	2.72404	0.145088	-4.23074	1.1484e-05	0.000125066	0	0	0	0	0
Unigene0048701	21.4582	1.15279	-4.21832	1.92749e-65	1.47795e-63	PREDICTED: limonoid UDP0glucosyltransferase0like [Cicer arietinum]	ko00940//Phenylpropanoid biosynthesis	0	GO:0016757//transferase activity, transferring glycosyl groups	0
Unigene0014526	3.98843	0.215304	-4.21138	7.1757e-15	2.39269e-13	pherophorin0dz1 protein [Volvox carteri f. nagariensis]	0	0	0	0
Unigene0033947	0.468284	0.0254509	-4.2016	3.5205e-10	6.51882e-09	ATP synthase CF1 alpha subunit [Pisum sativum]	ko00190//Oxidative phosphorylation;ko00195//Photosynthesis	GO:0033178//proton0transporting two0sector ATPase complex, catalytic domain;GO:0019866//organelle inner membrane;GO:0009534//chloroplast thylakoid	GO:0032550;GO:0019829//cation0transporting ATPase activity;GO:0015078//hydrogen ion transmembrane transporter activity	GO:0015988//energy coupled proton transport, against electrochemical gradient;GO:0015986//ATP synthesis coupled proton transport
Unigene0051391	6.63998	0.360878	-4.2016	2.59454e-19	1.04416e-17	0	0	0	0	0
Unigene0082254	11.9321	0.658096	-4.18041	2.36678e-32	1.30988e-30	0	0	0	0	0
Unigene0034686	2.01832	0.111979	-4.17185	1.93987e-05	0.000203587	Receptor0like protein kinase [Medicago truncatula]	0	0	0	0
Unigene0051585	2.99689	0.166272	-4.17185	1.93987e-05	0.000203556	0	0	0	0	0
Unigene0048398	2.01069	0.116407	-4.11045	1.68167e-09	2.94104e-08	Zinc finger protein [Medicago truncatula]	0	0	0	GO:0044699;GO:0032502//developmental process
Unigene0050985	15.9777	0.925008	-4.11045	9.82598e-35	5.66789e-33	Myb transcription factor [Medicago truncatula]	0	GO:0043231//intracellular membrane0bounded organelle	GO:0003676//nucleic acid binding	0
Unigene0041323	473.025	27.8138	-4.08804	0	0	chalcone synthase 1 [Glycyrrhiza uralensis]	ko04712//Circadian rhythm 0 plant;ko00941//Flavonoid biosynthesis	0	GO:0016747//transferase activity, transferring acyl groups other than amino0acyl groups	GO:0008152//metabolic process
Unigene0034004	7.78535	0.460739	-4.07874	1.65875e-17	6.29357e-16	PREDICTED: limonoid UDP0glucosyltransferase0like [Cicer arietinum]	0	0	GO:0016758//transferase activity, transferring hexosyl groups	0
Unigene0039293	7.79075	0.471537	-4.04632	4.7509e-09	8.00707e-08	metal ion binding protein [Cucumis melo subsp. melo]	0	0	GO:0043169//cation binding	GO:0006812//cation transport
Unigene0053604	2.31373	0.140039	-4.04632	5.51244e-05	0.000531716	0	0	0	0	0
Unigene0057363	1.34215	0.0812339	-4.04632	5.51244e-05	0.000531642	PREDICTED: josephin0like protein0like [Cicer arietinum]	0	0	0	0
Unigene0031178	10.2461	0.630261	-4.02299	3.7267e-67	2.89258e-65	Myb0like protein AA [Medicago truncatula]	0	0	0	0
Unigene0053292	2.43638	0.150892	-4.01315	7.97504e-09	1.31171e-07	CUB and sushi domain0containing protein 3 [Theobroma cacao]	0	0	GO:0046914//transition metal ion binding	0
Unigene0006378	1.59981	0.10144	-3.9792	9.27126e-05	0.000851799	0	0	0	0	0
Unigene0023368	1.67291	0.106075	-3.9792	9.27126e-05	0.000852023	0	0	0	0	0
Unigene0062012	1.15661	0.0733375	-3.9792	9.27126e-05	0.000851911	Beta0galactosidase [Medicago truncatula]	0	0	GO:0097159	GO:0043170;GO:0044238//primary metabolic process
Unigene0052994	5.54083	0.355563	-3.96193	6.16186e-16	2.18213e-14	PREDICTED: cytochrome P450 83B10like [Cicer arietinum]	0	0	GO:0046914//transition metal ion binding;GO:0016491//oxidoreductase activity;GO:0046906//tetrapyrrole binding	GO:0044710
Unigene0042504	158.713	10.2036	-3.95927	5.421e-217	6.13701e-215	PREDICTED: chalcone synthase 1B0like [Cicer arietinum]	ko04712//Circadian rhythm 0 plant;ko00941//Flavonoid biosynthesis	0	GO:0016747//transferase activity, transferring acyl groups other than amino0acyl groups	GO:0008152//metabolic process
Unigene0022962	2.52956	0.16298	-3.95612	3.62152e-12	8.49246e-11	OSJNBb0048E02.14 [Oryza sativa Japonica Group]	0	GO:0043231//intracellular membrane0bounded organelle	0	0
Unigene0042222	77.1692	5.0271	-3.94023	0	0	PREDICTED: inorganic phosphate transporter 1040like [Cicer arietinum]	0	0	0	0
Unigene0051408	7.31972	0.50538	-3.85635	9.79422e-25	4.62307e-23	PREDICTED: LOW QUALITY PROTEIN: wall0associated receptor kinase 20like [Cicer arietinum]	0	0	GO:0004674//protein serine/threonine kinase activity;GO:0097159;GO:0043167//ion binding;GO:1901363;GO:0036094	GO:0006468//protein phosphorylation
Unigene0059516	3.36573	0.232813	-3.85367	1.33862e-14	4.38581e-13	hypothetical protein MTR_5g095430 [Medicago truncatula]	0	0	0	0
Unigene0049745	5.48556	0.384438	-3.83481	1.0477e-07	1.53019e-06	0	0	0	0	0
Unigene0050883	1.75583	0.123052	-3.83481	1.0477e-07	1.53051e-06	PREDICTED: uncharacterized LOC101219905, partial [Cucumis sativus]	0	0	0	0
Unigene0003708	17.2093	1.2276	-3.80928	1.49715e-20	6.29067e-19	PREDICTED: auxin0induced protein 22E0like [Cicer arietinum]	0	GO:0043231//intracellular membrane0bounded organelle	GO:0005515//protein binding	GO:0009755//hormone0mediated signaling pathway;GO:0006351//transcription, DNA0dependent
Unigene0003199	1.05813	0.07616	-3.79634	1.74801e-07	2.48624e-06	Mitochondrial carnitine/acylcarnitine carrier protein [Medicago truncatula]	0	0	0	0
Unigene0006895	3.3145	0.238564	-3.79634	1.74801e-07	2.48726e-06	0	0	0	0	0
Unigene0052567	4.25669	0.30638	-3.79634	1.74801e-07	2.48573e-06	PREDICTED: uric acid degradation bifunctional protein TTL0like isoform X1 [Cicer arietinum]	ko00230//Purine metabolism	GO:0044444//cytoplasmic part	GO:0016812//hydrolase activity, acting on carbon0nitrogen (but not peptide) bonds, in cyclic amides	GO:0051234//establishment of localization;GO:0051716//cellular response to stimulus;GO:1901576;GO:0007154//cell communication;GO:0009112;GO:0016043//cellular component organization;GO:0050794//regulation of cellular process;GO:0006952//defense response;GO:0044249//cellular biosynthetic process
Unigene0055560	2.25725	0.162468	-3.79634	1.74801e-07	2.48675e-06	0	0	0	0	0
Unigene0043580	94.1582	6.78635	-3.79438	0	0	Flavonol synthase/flavanone 30hydroxylase [Medicago truncatula]	ko00941//Flavonoid biosynthesis	0	0	0
Unigene0009951	11.6226	0.884349	-3.71617	4.72642e-13	1.27348e-11	chalcone synthase 1 [Astragalus membranaceus]	ko04712//Circadian rhythm 0 plant;ko00941//Flavonoid biosynthesis	0	GO:0016747//transferase activity, transferring acyl groups other than amino0acyl groups;GO:0046914//transition metal ion binding;GO:0016702//oxidoreductase activity, acting on single donors with incorporation of molecular oxygen, incorporation of two atoms of oxygen	GO:0006633//fatty acid biosynthetic process
Unigene0015219	4.5985	0.349894	-3.71617	4.72642e-13	1.27397e-11	PREDICTED: B3 domain0containing protein At2g360800like [Cicer arietinum]	0	0	0	0
Unigene0048452	0.807369	0.0614318	-3.71617	4.8481e-07	6.52376e-06	ferulate 50hydroxylase [Medicago sativa]	ko00940//Phenylpropanoid biosynthesis	0	GO:0046914//transition metal ion binding;GO:0016491//oxidoreductase activity;GO:0046906//tetrapyrrole binding	GO:0044710
Unigene0043434	246.598	18.9178	-3.70434	6.32988e-246	7.39438e-244	chalone synthase [Senna tora]	ko04712//Circadian rhythm 0 plant;ko00941//Flavonoid biosynthesis	0	0	0
Unigene0012059	2.7133	0.212524	-3.67435	8.05824e-07	1.0528e-05	hypothetical protein MTR_6g060390 [Medicago truncatula]	0	0	0	0
Unigene0011733	1.40105	0.10974	-3.67435	8.05824e-07	1.05261e-05	Os04g0613300 [Oryza sativa Japonica Group]	0	0	0	0
Unigene0042089	386.293	30.6244	-3.65694	1.61081e-288	1.95042e-286	Chalcone synthase [Medicago truncatula]	ko04712//Circadian rhythm 0 plant;ko00941//Flavonoid biosynthesis	0	0	0
Unigene0061030	2.61583	0.207948	-3.65298	2.1549e-12	5.22027e-11	PREDICTED: uncharacterized membrane protein YMR155W0like [Cicer arietinum]	0	0	0	0
Unigene0005007	63.1515	5.03685	-3.64822	1.06302e-164	1.11295e-162	PREDICTED: transcription factor CPC0like [Cicer arietinum]	0	0	0	0
Unigene0049545	5.03645	0.406443	-3.63128	1.33754e-06	1.69008e-05	0	0	0	0	0
Unigene0061791	3.80617	0.307159	-3.63128	1.33754e-06	1.68977e-05	0	0	0	0	0
Unigene0064729	1.74136	0.140528	-3.63128	1.33754e-06	1.68946e-05	Cysteine0rich receptor0like protein kinase [Medicago truncatula]	0	0	GO:0016772//transferase activity, transferring phosphorus0containing groups;GO:0097159;GO:1901363	0
Unigene0033944	3.41358	0.277835	-3.61899	7.33264e-69	5.76859e-67	ATP synthase CF1 alpha subunit [Pisum sativum]	ko00190//Oxidative phosphorylation;ko00195//Photosynthesis	GO:0033178//proton0transporting two0sector ATPase complex, catalytic domain;GO:0019866//organelle inner membrane;GO:0009534//chloroplast thylakoid	GO:0032550;GO:0019829//cation0transporting ATPase activity;GO:0015078//hydrogen ion transmembrane transporter activity	GO:0015988//energy coupled proton transport, against electrochemical gradient;GO:0015986//ATP synthesis coupled proton transport
Unigene0050452	3.86274	0.314905	-3.61663	1.7867e-17	6.7643e-16	nuclear transport factor 2 and RNA recognition motif domain0containing protein [Arabidopsis thaliana]	0	0	0	0
Unigene0048237	2.20203	0.180439	-3.60926	5.9024e-12	1.33596e-10	PREDICTED: transcription factor TCP130like isoform X1 [Cicer arietinum]	0	GO:0009536//plastid	GO:0001071//nucleic acid binding transcription factor activity	GO:0048827//phyllome development;GO:0006952//defense response;GO:0048869;GO:0009725//response to hormone stimulus;GO:0032787//monocarboxylic acid metabolic process;GO:0009887//organ morphogenesis;GO:0006351//transcription, DNA0dependent;GO:0040034//regulation of development, heterochronic
Unigene0029635	3.54645	0.295143	-3.58689	2.21684e-06	2.7073e-05	0	0	0	0	0
Unigene0065555	3.09935	0.257935	-3.58689	2.21684e-06	2.70825e-05	PREDICTED: CLAVATA3/ESR (CLE)0related protein 30like [Cicer arietinum]	0	0	0	0
Unigene0084240	3.08242	0.256526	-3.58689	1.11457e-19	4.54864e-18	PREDICTED: MATE efflux family protein 90like [Cicer arietinum]	0	0	0	0
Unigene0082525	1.48769	0.123809	-3.58689	2.21684e-06	2.70777e-05	PREDICTED: serine/threonine0protein kinase TNNI3K0like [Cicer arietinum]	0	0	0	0
Unigene0010718	1.93782	0.168281	-3.52549	1.23725e-08	1.9991e-07	0	0	0	0	0
Unigene0003370	0.507214	0.0450256	-3.49378	6.0609e-06	6.89958e-05	PREDICTED: uncharacterized LOC101221161 [Cucumis sativus]	0	GO:0043231//intracellular membrane0bounded organelle	0	0
Unigene0050217	5.92954	0.526367	-3.49378	9.76582e-16	3.39793e-14	PREDICTED: F0box protein At2g268500like [Cicer arietinum]	0	0	0	0
Unigene0053912	5.41769	0.480931	-3.49378	6.0609e-06	6.89845e-05	0	0	0	0	0
Unigene0083708	1.38336	0.122801	-3.49378	6.0609e-06	6.89732e-05	PREDICTED: uncharacterized LOC101205220 [Cucumis sativus]	0	0	0	0
Unigene0041389	301.735	27.0893	-3.47749	0	0	Chalcone synthase [Medicago truncatula]	ko04712//Circadian rhythm 0 plant;ko00941//Flavonoid biosynthesis	0	GO:0046983//protein dimerization activity;GO:0016747//transferase activity, transferring acyl groups other than amino0acyl groups	GO:0008152//metabolic process
Unigene0049638	2.18662	0.19673	-3.47441	4.32774e-13	1.1747e-11	AT5G101500like protein [Arabidopsis arenosa]	0	0	0	0
Unigene0024555	0.726834	0.0659877	-3.46136	3.3599e-08	5.17995e-07	Photosystem I P700 chlorophyll a apoprotein [Medicago truncatula]	ko00195//Photosynthesis	0	0	0
Unigene0045696	21.4349	1.96389	-3.44818	5.89316e-36	3.47417e-34	hypothetical protein MTR_8g086770 [Medicago truncatula]	0	0	0	0
Unigene0023084	4.69469	0.43112	-3.44487	9.99606e-06	0.00010979	PREDICTED: uncharacterized protein LOC100785198 [Glycine max]	0	0	0	0
Unigene0006115	0.771881	0.0708829	-3.44487	9.99606e-06	0.000109807	Calpain0B [Medicago truncatula]	ko04626//Plant0pathogen interaction	GO:0044424//intracellular part	GO:0046872//metal ion binding;GO:0016772//transferase activity, transferring phosphorus0containing groups	GO:0006796//phosphate0containing compound metabolic process
Unigene0004493	52.4473	4.97858	-3.39706	0	0	Anthocyanidin 5 30O0glucosyltransferase [Medicago truncatula]	0	0	0	0
Unigene0008659	21.0945	2.00632	-3.39424	1.16496e-27	5.89019e-26	dormancy0associated protein [Pisum sativum]	ko03040//Spliceosome	0	0	0
Unigene0065344	1.85553	0.176482	-3.39424	1.64559e-05	0.000175051	ribosomal protein S4 (mitochondrion) [Lotus japonicus]	0	GO:0009536//plastid;GO:0044391	GO:0003723//RNA binding;GO:0005198//structural molecule activity	GO:0010467//gene expression
Unigene0002047	2.32878	0.221493	-3.39424	1.64559e-05	0.000175104	PREDICTED: polyadenylate0binding protein 20like isoform X1 [Cicer arietinum]	ko03015//mRNA surveillance pathway	0	0	0
Unigene0081712	1.42126	0.135178	-3.39424	1.64559e-05	0.000175077	0	0	0	0	0
Unigene0042599	329.536	32.0589	-3.36164	0	0	chalcone synthase [Pisum sativum]	ko04712//Circadian rhythm 0 plant;ko00941//Flavonoid biosynthesis	0	GO:0016747//transferase activity, transferring acyl groups other than amino0acyl groups	GO:0008152//metabolic process
Unigene0003461	12.9509	1.268	-3.35242	8.42438e-12	1.8485e-10	0	0	0	0	0
Unigene0053728	4.0056	0.392182	-3.35242	2.0672e-22	9.22003e-21	photosystem II protein D2 [Parthenium argentatum]	ko00195//Photosynthesis	GO:0031224//intrinsic to membrane;GO:0009521;GO:0009534//chloroplast thylakoid	GO:0046906//tetrapyrrole binding;GO:0046914//transition metal ion binding;GO:0009055//electron carrier activity;GO:0003824//catalytic activity	GO:0009767//photosynthetic electron transport chain;GO:0006464//protein modification process
Unigene0052740	5.82701	0.571715	-3.34939	9.06234e-31	4.86842e-29	PREDICTED: ammonium transporter 1 member 30like [Cicer arietinum]	0	GO:0031224//intrinsic to membrane	GO:0015077//monovalent inorganic cation transmembrane transporter activity;GO:0008092//cytoskeletal protein binding;GO:0016787//hydrolase activity	GO:0015696//ammonium transport;GO:0006996//organelle organization
Unigene0002048	2.72271	0.268551	-3.34177	1.41267e-09	2.48557e-08	N0hydroxycinnamoyl/benzoyltransferase [Medicago truncatula]	0	0	GO:0016746//transferase activity, transferring acyl groups;GO:0015036//disulfide oxidoreductase activity	GO:0019725//cellular homeostasis
Unigene0056651	3.62088	0.357141	-3.34177	2.70372e-05	0.000276988	0	0	0	0	0
Unigene0083434	1.28018	0.126269	-3.34177	2.70372e-05	0.000276947	PREDICTED: CASP0like protein GSVIVT000343320010like [Cicer arietinum]	0	0	0	0
Unigene0027633	0.944334	0.0937217	-3.33284	3.62244e-26	1.77235e-24	RNA polymerase beta'' subunit [Pisum sativum]	ko00230//Purine metabolism;ko00240//Pyrimidine metabolism;ko03020//RNA polymerase	GO:0009536//plastid;GO:0033178//proton0transporting two0sector ATPase complex, catalytic domain	GO:0032550;GO:0019829//cation0transporting ATPase activity;GO:0015078//hydrogen ion transmembrane transporter activity;GO:0003676//nucleic acid binding;GO:0034062//RNA polymerase activity	GO:0015988//energy coupled proton transport, against electrochemical gradient;GO:0010467//gene expression;GO:0006754//ATP biosynthetic process;GO:0009059//macromolecule biosynthetic process
Unigene0052651	5.46944	0.546215	-3.32385	1.36738e-13	4.05629e-12	0	0	0	0	0
Unigene0045037	20.556	2.05951	-3.31919	1.46764e-127	1.42314e-125	GT0like trihelix DNA0binding protein [Citrus unshiu]	0	0	0	0
Unigene0008055	1.80479	0.18486	-3.28733	4.433e-05	0.000435869	0	0	0	0	0
Unigene0064584	1.48804	0.152416	-3.28733	4.433e-05	0.000436054	Polynucleotidyl transferase, Ribonuclease H fold [Medicago truncatula]	0	0	GO:0003824//catalytic activity	0
Unigene0007979	0.452932	0.0463926	-3.28733	4.433e-05	0.000435807	Protein arginine methyltransferase [Medicago truncatula]	0	GO:0044444//cytoplasmic part	GO:0016741	GO:0009451//RNA modification;GO:0006606//protein import into nucleus;GO:0008213;GO:0006221//pyrimidine nucleotide biosynthetic process;GO:0006997//nucleus organization;GO:0003006//developmental process involved in reproduction
Unigene0034691	6.29108	0.644379	-3.28733	3.98908e-07	5.42763e-06	Cf04/9 disease resistance0like protein [Pisum sativum]	0	0	GO:0016772//transferase activity, transferring phosphorus0containing groups	GO:0006796//phosphate0containing compound metabolic process
Unigene0037633	1.78295	0.182623	-3.28733	4.433e-05	0.00043593	0	0	0	0	0
Unigene0052063	1.97408	0.2022	-3.28733	4.433e-05	0.000435746	BHLH transcription factor [Medicago truncatula]	0	GO:0043231//intracellular membrane0bounded organelle	GO:0003676//nucleic acid binding;GO:0001071//nucleic acid binding transcription factor activity;GO:0005515//protein binding	GO:0009725//response to hormone stimulus;GO:0006351//transcription, DNA0dependent
Unigene0083582	2.2534	0.23081	-3.28733	4.433e-05	0.000435992	0	0	0	0	0
Unigene0018666	128.698	13.3456	-3.26956	0	0	Phenylalanine ammonia0lyase [Medicago truncatula]	ko00940//Phenylpropanoid biosynthesis;ko00360//Phenylalanine metabolism;ko00910//Nitrogen metabolism	0	0	0
Unigene0042429	148.048	15.4401	-3.26131	9.72518e-192	1.06629e-189	chalcone synthase [Pisum sativum]	ko04712//Circadian rhythm 0 plant;ko00941//Flavonoid biosynthesis	0	0	0
Unigene0032927	28.3962	2.97478	-3.25484	3.81128e-74	3.0963e-72	acetyl0CoA carboxylase beta subunit [Pisum sativum]	ko00710//Carbon fixation in photosynthetic organisms;ko00630//Glyoxylate and dicarboxylate metabolism	GO:0009536//plastid	GO:0043167//ion binding;GO:0003824//catalytic activity	GO:0044237//cellular metabolic process;GO:0006629//lipid metabolic process;GO:0044281//small molecule metabolic process
Unigene0010623	27.7535	2.93842	-3.23955	2.64936e-210	2.95603e-208	H+0transporting two0sector ATPase, alpha/beta subunit, central region; H+0transporting two0sector ATPase, delta/epsilon subunit [Medicago truncatula]	ko00190//Oxidative phosphorylation;ko00195//Photosynthesis	GO:0033178//proton0transporting two0sector ATPase complex, catalytic domain;GO:0009534//chloroplast thylakoid	GO:0032550;GO:0019829//cation0transporting ATPase activity;GO:0015078//hydrogen ion transmembrane transporter activity	GO:0015988//energy coupled proton transport, against electrochemical gradient;GO:0015986//ATP synthesis coupled proton transport
Unigene0053307	3.81549	0.406443	-3.23074	7.25214e-05	0.000684446	0	0	0	0	0
Unigene0081616	0.927333	0.0987836	-3.23074	7.25214e-05	0.000683982	0	0	0	0	0
Unigene0086742	0.683887	0.0728507	-3.23074	7.25214e-05	0.000684539	0	0	0	0	0
Unigene0049818	2.95104	0.314358	-3.23074	7.25214e-05	0.000684353	PREDICTED: WEB family protein At2g383700like [Cicer arietinum]	0	0	0	0
Unigene0052465	4.09098	0.435789	-3.23074	7.25214e-05	0.000684075	0	0	0	0	0
Unigene0054669	1.31006	0.139553	-3.23074	7.25214e-05	0.00068426	Glutamate receptor 3.6 [Medicago truncatula]	0	GO:0009536//plastid	0	GO:0009987//cellular process;GO:0044699
Unigene0058731	1.45656	0.155159	-3.23074	7.25214e-05	0.000684168	0	0	0	0	0
Unigene0028203	12.9969	1.43026	-3.18382	3.0687e-19	1.22648e-17	PREDICTED: phenylalanine ammonia0lyase0like [Cicer arietinum]	ko00940//Phenylpropanoid biosynthesis;ko00360//Phenylalanine metabolism;ko00910//Nitrogen metabolism	GO:0044424//intracellular part	GO:0016841//ammonia0lyase activity	GO:0009699//phenylpropanoid biosynthetic process;GO:0006558//L0phenylalanine metabolic process
Unigene0017771	12.7611	1.40961	-3.17839	4.83848e-99	4.35232e-97	PREDICTED: probable anion transporter 3, chloroplastic0like [Cicer arietinum]	0	GO:0043231//intracellular membrane0bounded organelle;GO:0031224//intrinsic to membrane	GO:0005402;GO:0008509//anion transmembrane transporter activity	GO:0015698//inorganic anion transport;GO:0044763;GO:0008643//carbohydrate transport
Unigene0037440	2.21788	0.246103	-3.17185	2.65102e-08	4.1282e-07	polyprotein [Glycine max]	0	0	GO:0003676//nucleic acid binding	GO:0043170;GO:0044238//primary metabolic process
Unigene0052306	2.23474	0.247974	-3.17185	4.18396e-10	7.70023e-09	Leucine rich repeat protein [Medicago truncatula]	0	0	0	0
Unigene0042519	280.009	31.7004	-3.1429	0	0	pherophorin0dz1 protein [Volvox carteri f. nagariensis]	0	0	0	0
Unigene0084887	43.3389	4.93609	-3.13422	4.35692e-210	4.85347e-208	Solute carrier family 35 member F1 [Medicago truncatula]	0	0	0	0
Unigene0084282	5.52405	0.634745	-3.12148	1.60505e-58	1.18003e-56	NAD(P)H0quinone oxidoreductase subunit H [Medicago truncatula]	ko00190//Oxidative phosphorylation	0	0	0
Unigene0045754	57.7695	6.64769	-3.11938	7.09856e-107	6.52009e-105	PREDICTED: lipoxygenase homology domain0containing protein 10like [Cicer arietinum]	0	0	0	0
Unigene0032926	16.5622	1.91116	-3.11537	0	0	PetA, partial (chloroplast) [Galearia maingayi]	ko00195//Photosynthesis	0	0	0
Unigene0084812	3.27158	0.378808	-3.11045	2.854e-11	5.82881e-10	RING0H2 finger protein ATL4M [Medicago truncatula]	0	0	0	0
Unigene0013840	3.05284	0.35348	-3.11045	6.96886e-08	1.03896e-06	PREDICTED: myosin090like [Cicer arietinum]	0	0	GO:0016740//transferase activity	0
Unigene0043838	115.414	13.4018	-3.10632	1.96431e-227	2.26051e-225	0	0	0	0	0
Unigene0020426	2.33155	0.273934	-3.08939	4.55114e-06	5.30139e-05	PREDICTED: bifunctional epoxide hydrolase 20like [Cicer arietinum]	0	0	GO:0003824//catalytic activity	0
Unigene0049457	2.43699	0.288443	-3.07874	1.12733e-07	1.63995e-06	PREDICTED: palmitoyl0acyl carrier protein thioesterase, chloroplastic0like [Cicer arietinum]	ko00061//Fatty acid biosynthesis	GO:0009536//plastid	GO:0044620;GO:0016788//hydrolase activity, acting on ester bonds;GO:0004312//fatty acid synthase activity	GO:0006631//fatty acid metabolic process
Unigene0042675	306.286	36.3019	-3.07676	0	0	dihydroflavonol 40reductase [Medicago sativa]	ko00941//Flavonoid biosynthesis	0	0	0
Unigene0000285	2.72464	0.329819	-3.04632	7.36384e-06	8.2639e-05	0	0	0	0	0
Unigene0049256	3.73024	0.451547	-3.04632	7.36384e-06	8.26257e-05	AT0hook DNA0binding protein [Catharanthus roseus]	0	0	0	0
Unigene0058098	1.88867	0.228624	-3.04632	7.36384e-06	8.26524e-05	0	0	0	0	0
Unigene0083368	10.5633	1.28903	-3.0347	9.0541e-54	6.42583e-52	Transcription factor bHLH93 [Medicago truncatula]	0	0	0	0
Unigene0010966	2.03881	0.252539	-3.01315	2.9358e-07	4.06279e-06	0	0	0	0	0
Unigene0045020	7.92319	0.981411	-3.01315	1.80878e-19	7.31742e-18	Auxin0induced protein 5NG4 [Medicago truncatula]	0	GO:0000325//plant0type vacuole;GO:0031090//organelle membrane	0	GO:0043479;GO:0005976//polysaccharide metabolic process;GO:0045764;GO:0045229//external encapsulating structure organization;GO:0032535;GO:0009826//unidimensional cell growth;GO:0006970//response to osmotic stress;GO:0009746;GO:0048588//developmental cell growth;GO:0009832//plant0type cell wall biogenesis;GO:0010073//meristem maintenance;GO:0060918//auxin transport;GO:0042044//fluid transport
Unigene0048253	11.6894	1.45573	-3.00539	7.88388e-21	3.33677e-19	PREDICTED: chaperone protein dnaJ 11, chloroplastic0like [Cicer arietinum]	0	0	0	0
Unigene0027722	6.75828	0.843659	-3.00192	3.52546e-37	2.12514e-35	30S ribosomal protein S11 [Medicago truncatula]	ko00230//Purine metabolism;ko00240//Pyrimidine metabolism;ko03020//RNA polymerase	GO:0030529//ribonucleoprotein complex;GO:0009536//plastid	GO:0034062//RNA polymerase activity;GO:0003676//nucleic acid binding;GO:0005515//protein binding;GO:0005198//structural molecule activity	GO:0010467//gene expression
Unigene0057505	1.10556	0.138011	-3.00192	1.18896e-05	0.000129281	PREDICTED: indole030pyruvate monooxygenase YUCCA20like isoform X1 [Cicer arietinum]	ko00380//Tryptophan metabolism	0	GO:0016709//oxidoreductase activity, acting on paired donors, with incorporation or reduction of molecular oxygen, NADH or NADPH as one donor, and incorporation of one atom of oxygen;GO:0000166//nucleotide binding	GO:0044710
Unigene0050511	10.6824	1.34553	-2.98899	1.30795e-11	2.8054e-10	PREDICTED: auxin0induced protein 22E0like [Cicer arietinum]	0	GO:0043231//intracellular membrane0bounded organelle	GO:0005515//protein binding	GO:0009755//hormone0mediated signaling pathway;GO:0006351//transcription, DNA0dependent
Unigene0048960	11.8217	1.49029	-2.98777	6.61418e-25	3.13478e-23	0	0	0	0	0
Unigene0013081	1.23063	0.156062	-2.9792	4.72554e-07	6.37239e-06	PREDICTED: growth0regulating factor 50like isoform X1 [Cicer arietinum]	0	GO:0043231//intracellular membrane0bounded organelle	GO:0032550;GO:0016817//hydrolase activity, acting on acid anhydrides	GO:0006351//transcription, DNA0dependent
Unigene0044062	87.9622	11.1636	-2.97808	0	0	Emb:CAB81597.1 [Theobroma cacao]	0	0	0	0
Unigene0050110	2.70745	0.348883	-2.95612	1.91537e-05	0.000201228	PREDICTED: multiple RNA0binding domain0containing protein 10like [Cicer arietinum]	0	GO:0043231//intracellular membrane0bounded organelle	GO:0097159	0
Unigene0041354	84.3398	10.884	-2.954	4.00304e-219	4.56143e-217	non0specific lipid transfer0like protein [Phaseolus vulgaris]	0	0	0	0
Unigene0084715	4.5328	0.586802	-2.94946	3.36298e-11	6.80246e-10	0	0	0	0	0
Unigene0004103	4.89066	0.635335	-2.94444	7.59268e-07	9.95153e-06	PREDICTED: photosystem II reaction center W protein, chloroplastic0like [Cicer arietinum]	0	0	0	0
Unigene0003629	1.5036	0.195329	-2.94444	7.59268e-07	9.9534e-06	Gibberellin 20beta0dioxygenase [Medicago truncatula]	0	0	0	0
Unigene0015795	1.74339	0.228336	-2.93266	1.28224e-09	2.26697e-08	PREDICTED: myosin090like [Cicer arietinum]	0	0	0	0
Unigene0051536	12.0743	1.5814	-2.93266	4.88844e-18	1.88141e-16	pherophorin0dz1 protein [Volvox carteri f. nagariensis]	0	0	0	0
Unigene0008999	5.12588	0.676899	-2.92079	7.80792e-18	2.98523e-16	NAD(P)H0quinone oxidoreductase subunit H [Medicago truncatula]	ko00190//Oxidative phosphorylation	0	0	0
Unigene0051074	1.20982	0.161095	-2.90882	3.0783e-05	0.000311966	Guanine nucleotide0binding protein alpha02 subunit [Medicago truncatula]	0	0	0	0
Unigene0002344	2.1356	0.284366	-2.90882	1.21765e-06	1.54928e-05	protein little zipper 3 [Arabidopsis thaliana]	0	GO:0043231//intracellular membrane0bounded organelle	0	GO:0044248//cellular catabolic process;GO:0006631//fatty acid metabolic process;GO:0044092//negative regulation of molecular function;GO:0009965//leaf morphogenesis;GO:0010051//xylem and phloem pattern formation;GO:0010073//meristem maintenance;GO:0009798//axis specification
Unigene0050643	6.69872	0.891972	-2.90882	1.02947e-21	4.4853e-20	Os03g0806700 [Oryza sativa Japonica Group]	0	0	0	0
Unigene0051496	1.89856	0.252803	-2.90882	1.21765e-06	1.54899e-05	PREDICTED: probable glycosyltransferase At3g076200like [Cicer arietinum]	0	0	0	GO:0006351//transcription, DNA0dependent
Unigene0053051	5.19023	0.691108	-2.90882	3.0783e-05	0.00031192	0	0	0	0	0
Unigene0044893	45.8122	6.12432	-2.90311	1.63296e-103	1.48811e-101	cysteine protease [Vicia sativa]	0	0	0	0
Unigene0004104	14.0155	1.91175	-2.87405	7.58052e-29	3.92692e-27	0	0	0	0	0
Unigene0003431	4.4982	0.614318	-2.87229	1.94893e-06	2.40245e-05	0	0	0	0	0
Unigene0081854	2.32911	0.318086	-2.87229	1.94893e-06	2.40288e-05	0	0	0	0	0
Unigene0019904	15.0953	2.07162	-2.86527	2.77298e-49	1.89092e-47	PREDICTED: zinc finger protein MAGPIE0like isoform X1 [Cicer arietinum]	0	0	0	0
Unigene0083440	5.60484	0.770008	-2.86373	3.48636e-18	1.34925e-16	PREDICTED: cyclin0dependent kinase inhibitor 70like [Cucumis sativus]	0	0	0	0
Unigene0030482	3.90063	0.537301	-2.85991	5.23064e-09	8.77948e-08	PREDICTED: heat shock protein STI0like [Cicer arietinum]	ko05020//Prion diseases	0	0	0
Unigene0049230	13.8269	1.92117	-2.84741	1.27671e-16	4.65386e-15	ribosomal protein S14 [Pisum sativum]	ko03010//Ribosome	GO:0030529//ribonucleoprotein complex;GO:0009536//plastid	GO:0003723//RNA binding;GO:0005198//structural molecule activity	GO:0010467//gene expression
Unigene0025510	6.46165	0.898931	-2.84562	3.49324e-10	6.47007e-09	phenylalanine ammonia lyase [Trifolium pratense]	ko00940//Phenylpropanoid biosynthesis;ko00360//Phenylalanine metabolism;ko00910//Nitrogen metabolism	0	0	0
Unigene0050384	10.8206	1.50534	-2.84562	4.83438e-28	2.46762e-26	aminophospholipid ATPase [Populus trichocarpa]	0	GO:0031224//intrinsic to membrane	GO:0005548//phospholipid transporter activity;GO:0046872//metal ion binding;GO:0008324//cation transmembrane transporter activity;GO:0003824//catalytic activity;GO:0032550	GO:0006869//lipid transport;GO:0006811//ion transport
Unigene0013679	1.05414	0.147752	-2.83481	3.113e-06	3.7106e-05	hypothetical protein MTR_2g097660 [Medicago truncatula]	0	0	0	0
Unigene0049882	3.91469	0.548698	-2.83481	3.113e-06	3.70997e-05	Guanine nucleotide0binding protein alpha02 subunit [Medicago truncatula]	0	GO:0043231//intracellular membrane0bounded organelle;GO:0031234//extrinsic to internal side of plasma membrane	GO:0005102//receptor binding;GO:0032550;GO:0017111//nucleoside0triphosphatase activity;GO:0060089;GO:0032403//protein complex binding;GO:0017076//purine nucleotide binding	GO:0007187//G0protein signaling, coupled to cyclic nucleotide second messenger;GO:0034285;GO:0010015//root morphogenesis;GO:0009746;GO:0009154;GO:0009725//response to hormone stimulus
Unigene0000197	3.90139	0.546834	-2.83481	2.35256e-11	4.85598e-10	0	0	0	0	0
Unigene0042583	224.711	31.6176	-2.82927	0	0	anthocyanidin reductase [Trifolium repens]	ko00941//Flavonoid biosynthesis	0	0	0
Unigene0056949	3.28768	0.465716	-2.81955	2.01448e-07	2.838e-06	0	0	0	0	0
Unigene0013704	10.9372	1.55759	-2.81185	2.48656e-50	1.709e-48	cytochrome P450 enzyme [Pisum sativum]	ko00905//Brassinosteroid biosynthesis	GO:0031224//intrinsic to membrane	GO:0046906//tetrapyrrole binding;GO:0046914//transition metal ion binding;GO:0016491//oxidoreductase activity	GO:0016129
Unigene0049347	2.08747	0.297813	-2.80928	7.89034e-05	0.000734915	hypothetical protein MTR_4g133720 [Medicago truncatula]	0	0	0	0
Unigene0056784	1.67882	0.239511	-2.80928	7.89034e-05	0.000735014	PREDICTED: NAC domain0containing protein 70like [Cicer arietinum]	0	0	0	0
Unigene0046700	29.8114	4.28408	-2.79881	1.56547e-96	1.39377e-94	PREDICTED: squamosa promoter0binding0like protein 90like [Cicer arietinum]	0	0	0	0
Unigene0015218	3.3145	0.477129	-2.79634	4.96168e-06	5.74596e-05	PREDICTED: B3 domain0containing protein At2g360800like [Cicer arietinum]	0	GO:0043231//intracellular membrane0bounded organelle	GO:0003676//nucleic acid binding	GO:0006351//transcription, DNA0dependent
Unigene0050738	3.37452	0.485769	-2.79634	4.96168e-06	5.74691e-05	0	0	0	0	0
Unigene0049672	15.1459	2.19214	-2.78852	3.18156e-37	1.92116e-35	Myb0like protein AA [Medicago truncatula]	0	GO:0043231//intracellular membrane0bounded organelle	GO:0003676//nucleic acid binding	0
Unigene0049923	2.76171	0.399714	-2.78852	3.20434e-07	4.4125e-06	Sulfite exporter TauE/SafE family protein isoform 2 [Theobroma cacao]	0	GO:0031224//intrinsic to membrane	0	0
Unigene0008194	3.38338	0.493716	-2.77671	9.41048e-11	1.82656e-09	Myb0like transcription factor [Medicago truncatula]	0	0	GO:0005488//binding	0
Unigene0054661	3.8877	0.568867	-2.77275	4.32966e-13	1.17476e-11	Cytochrome b6/f complex subunit V [Medicago truncatula]	ko00195//Photosynthesis	GO:0031224//intrinsic to membrane;GO:0009521;GO:0009534//chloroplast thylakoid	GO:0043169//cation binding;GO:0009055//electron carrier activity	GO:0022900//electron transport chain;GO:0019684//photosynthesis, light reaction;GO:0043623//cellular protein complex assembly;GO:0006351//transcription, DNA0dependent
Unigene0042790	236.623	34.6584	-2.77131	0	0	Cytochrome B5 [Medicago truncatula]	0	0	GO:0043169//cation binding;GO:0046906//tetrapyrrole binding	GO:0006952//defense response;GO:0008610//lipid biosynthetic process;GO:1901362
Unigene0082480	3.81389	0.558624	-2.77131	3.36158e-27	1.68498e-25	PREDICTED: long chain acyl0CoA synthetase 40like [Cicer arietinum]	ko04146//Peroxisome;ko00071//Fatty acid metabolism;ko03320//PPAR signaling pathway;ko04920//Adipocytokine signaling pathway	0	GO:0003824//catalytic activity	0
Unigene0043899	182.737	26.9576	-2.761	0	0	Leucoanthocyanidin dioxygenase [Medicago truncatula]	ko00941//Flavonoid biosynthesis	GO:0044424//intracellular part	GO:0016706//oxidoreductase activity, acting on paired donors, with incorporation or reduction of molecular oxygen, 20oxoglutarate as one donor, and incorporation of one atom each of oxygen into both donors	GO:0009813//flavonoid biosynthetic process;GO:0009699//phenylpropanoid biosynthetic process;GO:0009725//response to hormone stimulus;GO:0006950//response to stress;GO:0006996//organelle organization
Unigene0002807	4.58946	0.679014	-2.75681	1.00741e-11	2.18842e-10	CLE38 protein [Glycine max]	0	0	0	0
Unigene0058107	3.62141	0.53579	-2.75681	1.7163e-24	8.05217e-23	RNA polymerase beta subunit [Pisum sativum]	ko00230//Purine metabolism;ko00240//Pyrimidine metabolism;ko03020//RNA polymerase	GO:0009536//plastid	GO:0034062//RNA polymerase activity;GO:0003676//nucleic acid binding;GO:0001882//nucleoside binding	GO:0010467//gene expression
Unigene0086004	1.62208	0.239987	-2.75681	7.89042e-06	8.81082e-05	PREDICTED: transcription factor bHLH300like [Cicer arietinum]	0	0	0	0
Unigene0019055	185.214	27.5044	-2.75146	0	0	Abscisic acid stress ripening protein [Medicago truncatula]	0	0	0	GO:0050896//response to stimulus
Unigene0003886	5.53464	0.839584	-2.72074	2.51492e-11	5.17424e-10	14 kDa proline0rich protein DC2.15 [Medicago truncatula]	0	0	GO:0005488//binding	0
Unigene0047908	7.07691	1.07354	-2.72074	2.51492e-11	5.17577e-10	GATA zinc finger domain0containing protein C1393.08 isoform 2 [Theobroma cacao]	0	0	0	0
Unigene0012801	1.16653	0.17752	-2.71617	1.25184e-05	0.000135885	Phosphate starvation0induced gene 3 isoform 1 [Theobroma cacao]	0	GO:0031224//intrinsic to membrane	GO:0005402	GO:0044765;GO:0044763;GO:0072506
Unigene0042520	92.7454	14.1477	-2.71271	0	0	PREDICTED: proline0rich extensin0like protein EPR10like [Cicer arietinum]	0	0	0	GO:0044763;GO:0042221//response to chemical stimulus;GO:0009791//post0embryonic development;GO:0048608//reproductive structure development;GO:0009628//response to abiotic stimulus;GO:0019538//protein metabolic process
Unigene0016550	2.18061	0.3332	-2.71027	5.5507e-09	9.28535e-08	PREDICTED: gibberellin 20beta0dioxygenase 20like [Cicer arietinum]	0	0	0	0
Unigene0040189	6.92406	1.05801	-2.71027	1.83739e-24	8.60865e-23	0	0	0	0	0
Unigene0024128	4.01174	0.614006	-2.7079	2.63054e-23	1.20017e-21	PREDICTED: LOW QUALITY PROTEIN: wall0associated receptor kinase 20like [Cicer arietinum]	0	GO:0031224//intrinsic to membrane	GO:0046872//metal ion binding;GO:0001871;GO:0004672//protein kinase activity;GO:0032550	GO:0006796//phosphate0containing compound metabolic process;GO:0006464//protein modification process
Unigene0047711	11.1626	1.71417	-2.70309	5.34286e-84	4.54195e-82	Inter0alpha0trypsin inhibitor heavy chain H4 [Medicago truncatula]	0	0	0	0
Unigene0053207	1.98807	0.308843	-2.68642	8.75632e-09	1.43445e-07	Os11g0118600 [Oryza sativa Japonica Group]	0	0	0	0
Unigene0022448	4.04715	0.628717	-2.68642	8.75632e-09	1.43411e-07	PREDICTED: protein0lysine methyltransferase METTL21A0like [Cicer arietinum]	0	0	0	0
Unigene0000797	1.52589	0.239037	-2.67435	1.98115e-05	0.000207325	Retrotransposon gag protein [Asparagus officinalis]	0	0	0	0
Unigene0005072	0.739872	0.115904	-2.67435	1.98115e-05	0.000207357	Os10g0474600 [Oryza sativa Japonica Group]	0	0	0	0
Unigene0050338	5.46508	0.856125	-2.67435	1.98115e-05	0.000207388	0	0	0	0	0
Unigene0061276	1.9121	0.299537	-2.67435	1.98115e-05	0.000207419	PREDICTED: uncharacterized protein LOC101510098 [Cicer arietinum]	0	0	0	0
Unigene0042774	2.16818	0.34546	-2.6499	9.04694e-16	3.15569e-14	copper amine oxidase [Pisum sativum]	0	0	GO:0046914//transition metal ion binding;GO:0016641//oxidoreductase activity, acting on the CH0NH2 group of donors, oxygen as acceptor;GO:0048037//cofactor binding	GO:0044710;GO:1901564
Unigene0013000	2.11418	0.337818	-2.64578	2.07656e-07	2.92014e-06	PREDICTED: DNA repair protein XRCC40like [Cicer arietinum]	ko03450//Non0homologous end0joining	GO:0043231//intracellular membrane0bounded organelle	GO:0003676//nucleic acid binding;GO:0032550	GO:0006281//DNA repair
Unigene0050374	2.60506	0.416254	-2.64578	2.07656e-07	2.91897e-06	0	0	0	0	0
Unigene0055118	1.09647	0.175201	-2.64578	2.07656e-07	2.91955e-06	PREDICTED: pentatricopeptide repeat0containing protein At5g271100like [Cicer arietinum]	0	0	0	0
Unigene0046676	40.0677	6.40825	-2.64444	2.60592e-45	1.723e-43	PREDICTED: ABC transporter C family member 100like [Glycine max]	0	GO:0031224//intrinsic to membrane	GO:0017111//nucleoside0triphosphatase activity;GO:0032550;GO:0016628//oxidoreductase activity, acting on the CH0CH group of donors, NAD or NADP as acceptor;GO:0015405	GO:0009154;GO:0044763;GO:0051234//establishment of localization
Unigene0011962	19.7107	3.18132	-2.63128	1.19209e-37	7.2613e-36	glycine0rich protein [Gossypium hirsutum]	0	0	0	0
Unigene0023594	1.13234	0.182761	-2.63128	3.1272e-05	0.000316645	ORF1 [Pisum sativum]	0	0	0	0
Unigene0005574	0.846534	0.136631	-2.63128	3.1272e-05	0.000316599	EH0domain0containing protein [Medicago truncatula]	0	0	0	0
Unigene0032253	2.38569	0.390975	-2.60926	3.58348e-09	6.09559e-08	PREDICTED: nucleobase0ascorbate transporter 120like [Cicer arietinum]	0	GO:0016020//membrane;GO:0009536//plastid	GO:0005215//transporter activity	GO:0051234//establishment of localization;GO:0044763
Unigene0048160	5.74641	0.942183	-2.60858	8.21672e-34	4.65478e-32	PREDICTED: cationic amino acid transporter 7, chloroplastic0like [Cicer arietinum]	0	GO:0031224//intrinsic to membrane	GO:0015171//amino acid transmembrane transporter activity	GO:0006865//amino acid transport;GO:0051707//response to other organism
Unigene0049780	12.3354	2.04333	-2.59381	1.57923e-26	7.7594e-25	ribosomal protein S8 [Pisum sativum]	ko03010//Ribosome	GO:0030529//ribonucleoprotein complex;GO:0009536//plastid	GO:0003723//RNA binding;GO:0005198//structural molecule activity	GO:0010467//gene expression
Unigene0005193	0.579272	0.0964166	-2.58689	4.92272e-05	0.000479617	PREDICTED: kinesin010like [Cicer arietinum]	0	0	0	0
Unigene0005881	11.9876	1.99527	-2.58689	7.28418e-13	1.90513e-11	0	0	0	0	0
Unigene0015975	4.24122	0.705927	-2.58689	4.92272e-05	0.00047955	0	0	0	0	0
Unigene0054170	1.34704	0.224208	-2.58689	4.97638e-06	5.76107e-05	LINE0type retrotransposon LIb DNA, Insertion at the S11 site0like protein [Theobroma cacao]	0	0	0	0
Unigene0082341	3.56387	0.593187	-2.58689	4.92272e-05	0.000479752	0	0	0	0	0
Unigene0086821	1.97615	0.32892	-2.58689	4.92272e-05	0.000479684	0	0	0	0	0
Unigene0039321	3.70204	0.618273	-2.58201	1.1301e-36	6.76534e-35	PREDICTED: NAD(P)H0quinone oxidoreductase subunit 2 B, chloroplastic0like [Cicer arietinum]	ko00190//Oxidative phosphorylation	GO:0031224//intrinsic to membrane;GO:0009534//chloroplast thylakoid	GO:0048037//cofactor binding;GO:0050136//NADH dehydrogenase (quinone) activity	GO:0051234//establishment of localization;GO:0022904//respiratory electron transport chain
Unigene0024961	4.06695	0.689229	-2.56089	8.3469e-08	1.23383e-06	0	0	0	0	0
Unigene0015450	3.18925	0.542127	-2.55651	8.01694e-07	1.0476e-05	PREDICTED: myosin090like [Cicer arietinum]	0	0	0	0
Unigene0086151	4.91395	0.838871	-2.55036	8.3244e-20	3.40923e-18	Transcription factor bHLH66 [Medicago truncatula]	0	0	0	0
Unigene0028288	3.8288	0.65784	-2.54108	7.72676e-05	0.000722288	0	0	0	0	0
Unigene0050298	2.05434	0.352964	-2.54108	7.72676e-05	0.000722482	0	0	0	0	0
Unigene0056333	2.69706	0.463392	-2.54108	7.72676e-05	0.000722385	0	0	0	0	0
Unigene0081696	8.41187	1.44871	-2.53765	8.69242e-210	9.66761e-208	hypothetical chloroplast RF1 [Medicago truncatula]	0	0	0	0
Unigene0003300	0.587184	0.101983	-2.52549	1.25248e-06	1.5904e-05	PREDICTED: geminivirus Rep0interacting motor protein0like [Cicer arietinum]	0	GO:0005875//microtubule associated complex	GO:0032550;GO:0003774//motor activity;GO:0015631//tubulin binding	GO:0007017//microtubule0based process;GO:0016458//gene silencing;GO:0048446//petal morphogenesis;GO:0006305;GO:0048447;GO:0034968//histone lysine methylation;GO:1902410
Unigene0052278	3.32021	0.576657	-2.52549	1.25248e-06	1.59011e-05	PREDICTED: serine/threonine0protein kinase TNNI3K0like [Cicer arietinum]	0	GO:0016020//membrane;GO:0043231//intracellular membrane0bounded organelle;GO:0044444//cytoplasmic part	GO:0032550;GO:0004672//protein kinase activity	GO:0009755//hormone0mediated signaling pathway;GO:0006605//protein targeting;GO:0006796//phosphate0containing compound metabolic process;GO:0006972//hyperosmotic response;GO:0010243//response to organic nitrogen;GO:0006464//protein modification process;GO:0009626//plant0type hypersensitive response;GO:0009694//jasmonic acid metabolic process
Unigene0034229	132.943	23.14	-2.52235	5.60352e-108	5.18106e-106	Pyridoxal phosphate phosphatase PHOSPHO2 [Medicago truncatula]	0	GO:0031224//intrinsic to membrane	GO:0017111//nucleoside0triphosphatase activity;GO:0032550;GO:0015405;GO:0042578//phosphoric ester hydrolase activity	GO:0009154;GO:0044763;GO:0051234//establishment of localization
Unigene0046856	12.3727	2.1556	-2.521	7.78264e-14	2.39969e-12	Calvin cycle protein CP12 [Medicago truncatula]	0	0	0	0
Unigene0085286	2.16935	0.380081	-2.51289	1.21928e-05	0.000132516	0	0	0	0	0
Unigene0038667	1.07365	0.189871	-2.49942	3.72542e-16	1.33286e-14	ribulose01,50bisphosphate carboxylase/oxygenase large subunit [Pisum sativum]	ko00710//Carbon fixation in photosynthetic organisms;ko00630//Glyoxylate and dicarboxylate metabolism	GO:0009536//plastid	GO:0046872//metal ion binding;GO:0016491//oxidoreductase activity;GO:0016831//carboxy0lyase activity	GO:0043094;GO:0015977//carbon fixation
Unigene0039671	302.02	53.4437	-2.49856	0	0	L0asparaginase [Medicago truncatula]	0	0	0	0
Unigene0021407	37.6608	6.71806	-2.48695	1.03133e-109	9.58672e-108	PREDICTED: ABC transporter C family member 100like isoform X2 [Cicer arietinum]	0	0	0	0
Unigene0086832	8.10887	1.47591	-2.4579	3.93986e-17	1.47317e-15	Multidrug resistance protein ABC transporter family [Medicago truncatula]	0	0	0	0
Unigene0003635	30.4499	5.54297	-2.45771	1.64717e-90	1.4353e-88	YABBY protein [Medicago truncatula]	0	GO:0043231//intracellular membrane0bounded organelle	GO:0001071//nucleic acid binding transcription factor activity	GO:0006412//translation;GO:0048869;GO:0009887//organ morphogenesis;GO:0006351//transcription, DNA0dependent;GO:0006325//chromatin organization
Unigene0018584	115.115	21.0184	-2.45336	0	0	PREDICTED: short0chain type dehydrogenase/reductase0like [Cicer arietinum]	ko01040//Biosynthesis of unsaturated fatty acids;ko00061//Fatty acid biosynthesis	0	0	0
Unigene0002776	1.75264	0.320317	-2.45196	4.90538e-07	6.59701e-06	UDP0glycosyltransferase [Medicago truncatula]	0	0	GO:0016757//transferase activity, transferring glycosyl groups	0
Unigene0030831	14.2963	2.61636	-2.45001	3.2982e-25	1.5793e-23	PREDICTED: heterodimeric geranylgeranyl pyrophosphate synthase small subunit, chloroplastic0like [Cicer arietinum]	ko00900//Terpenoid backbone biosynthesis	0	GO:0004659//prenyltransferase activity	GO:0006720//isoprenoid metabolic process
Unigene0041691	206.191	37.8602	-2.44523	0	0	Squamosa promoter binding0like protein [Medicago truncatula]	0	0	0	0
Unigene0005733	3.18713	0.589422	-2.43488	2.95632e-05	0.000300391	0	0	0	0	0
Unigene0047881	6.43269	1.19518	-2.42819	4.7118e-06	5.47388e-05	0	0	0	0	0
Unigene0031918	8.2657	1.53851	-2.42561	9.91542e-12	2.15462e-10	ribosomal protein L36 [Pisum sativum]	ko03010//Ribosome	GO:0009526//plastid envelope;GO:0009532//plastid stroma;GO:0030529//ribonucleoprotein complex	GO:0005198//structural molecule activity	GO:0006351//transcription, DNA0dependent
Unigene0029186	67.3123	12.5567	-2.42241	8.46242e-259	1.00543e-256	0	0	0	0	0
Unigene0018010	10.0764	1.90467	-2.40337	2.30992e-36	1.37574e-34	Naringenin,20oxoglutarate 30dioxygenase [Medicago truncatula]	ko00941//Flavonoid biosynthesis	0	GO:0016706//oxidoreductase activity, acting on paired donors, with incorporation or reduction of molecular oxygen, 20oxoglutarate as one donor, and incorporation of one atom each of oxygen into both donors	GO:0044710
Unigene0046290	25.9775	4.94149	-2.39424	1.08478e-33	6.13033e-32	0	0	0	0	0
Unigene0051702	2.36083	0.449083	-2.39424	4.58394e-05	0.000448872	PREDICTED: BON10associated protein 20like [Vitis vinifera]	0	0	0	0
Unigene0003038	3.01708	0.573916	-2.39424	7.29298e-06	8.19363e-05	PREDICTED: B3 domain0containing protein Os04g03869000like [Cicer arietinum]	0	0	0	GO:0006351//transcription, DNA0dependent
Unigene0006239	4.92156	0.936191	-2.39424	1.85688e-14	6.04402e-13	structural constituent of nuclear pore [Arabidopsis thaliana]	0	0	0	0
Unigene0006782	4.41456	0.839747	-2.39424	1.90938e-07	2.69813e-06	PREDICTED: growth0regulating factor 50like isoform X1 [Cicer arietinum]	0	GO:0043231//intracellular membrane0bounded organelle	GO:0032550;GO:0016817//hydrolase activity, acting on acid anhydrides	GO:0006351//transcription, DNA0dependentUnigene0006783
Unigene0028100	42.5716	8.09806	-2.39424	7.94734e-108	7.33843e-106	PREDICTED: wall0associated receptor kinase 20like [Vitis vinifera]	0	0	GO:0005488//binding	0
Unigene0017956	121.802	23.2306	-2.39044	2.54038e-249	2.99271e-247	PREDICTED: extensin0like [Cicer arietinum]	0	0	0	0
Unigene0024023	113.349	21.8063	-2.37796	2.7056e-211	3.03337e-209	PREDICTED: protein TRANSPARENT TESTA 120like [Cicer arietinum]	0	GO:0000325//plant0type vacuole;GO:0016020//membrane	GO:0015078//hydrogen ion transmembrane transporter activity;GO:0015291//secondary active transmembrane transporter activity	GO:0015851//nucleobase transport;GO:0015893//drug transport;GO:0044763;GO:0009699//phenylpropanoid biosynthetic process;GO:0009737//response to abscisic acid stimulus
Unigene0001819	12.1295	2.33398	-2.37766	4.43542e-39	2.75967e-37	Leucoanthocyanidin reductase [Medicago truncatula]	ko00941//Flavonoid biosynthesis	0	0	0
Unigene0048229	8.00334	1.55009	-2.36825	2.60616e-13	7.40305e-12	SBP [Medicago truncatula]	0	GO:0043231//intracellular membrane0bounded organelle	GO:0003676//nucleic acid binding	0
Unigene0045851	51.6529	10.026	-2.3651	1.59154e-38	9.8321e-37	phenylalanine ammonia lyase [Trifolium pratense]	ko00940//Phenylpropanoid biosynthesis;ko00360//Phenylalanine metabolism;ko00910//Nitrogen metabolism	GO:0044424//intracellular part	GO:0016841//ammonia0lyase activity	GO:0009411//response to UV;GO:0006575//cellular modified amino acid metabolic process;GO:0006558//L0phenylalanine metabolic process;GO:0009813//flavonoid biosynthetic process;GO:0009414//response to water deprivation;GO:0048229//gametophyte development;GO:0009696//salicylic acid metabolic process;GO:0009699//phenylpropanoid biosynthetic process;GO:0009808//lignin metabolic process;GO:0006595//pol…
Unigene0037641	3.83185	0.746682	-2.35948	1.12592e-05	0.000122791	PREDICTED: integrator complex subunit 90like [Cicer arietinum]	0	GO:0016591//DNA0directed RNA polymerase II, holoenzyme	0	GO:0016073
Unigene0018038	1.52892	0.299389	-2.35242	7.08636e-05	0.000669981	Zinc knuckle family protein [Solanum bulbocastanum]	0	0	0	0
Unigene0019024	0.645644	0.126428	-2.35242	7.08636e-05	0.00066989	PREDICTED: histone0lysine N0methyltransferase ATXR40like [Cicer arietinum]	0	GO:0043231//intracellular membrane0bounded organelle	0	0
Unigene0045874	43.2978	8.52585	-2.34438	1.04749e-119	9.93589e-118	PREDICTED: SPX domain0containing protein 30like [Cicer arietinum]	0	GO:0043231//intracellular membrane0bounded organelle	0	GO:0009267//cellular response to starvation;GO:0015698//inorganic anion transport;GO:0010647//positive regulation of cell communication;GO:0006351//transcription, DNA0dependent;GO:0009247//glycolipid biosynthetic process
Unigene0024111	12.3676	2.44264	-2.34005	9.1045e-24	4.18957e-22	DNA/RNA polymerases superfamily protein [Theobroma cacao]	0	0	GO:0046872//metal ion binding;GO:0003676//nucleic acid binding;GO:0016740//transferase activity	GO:0006259//DNA metabolic process
Unigene0019453	3.4222	0.687827	-2.31481	6.94564e-07	9.16732e-06	Os02g0658300 [Oryza sativa Japonica Group]	0	0	0	0
Unigene0049777	2.98343	0.600897	-2.31178	6.18764e-14	1.93185e-12	Adenylate isopentenyltransferase [Medicago truncatula]	ko00908//Zeatin biosynthesis	0	GO:0016765//transferase activity, transferring alkyl or aryl (other than methyl) groups	GO:0044260;GO:0090304
Unigene0042401	102.958	20.76	-2.31018	0	0	Scarecrow [Medicago truncatula]	0	0	0	0
Unigene0008928	4.30804	0.872929	-2.30309	4.27918e-06	5.00469e-05	0	0	0	0	0
Unigene0038387	3.94157	0.798672	-2.30309	4.27918e-06	5.00385e-05	0	0	0	0	0
Unigene0053030	5.36013	1.08611	-2.30309	4.27918e-06	5.00553e-05	PREDICTED: purple acid phosphatase0like [Cicer arietinum]	0	GO:0005911//cell0cell junction;GO:0005618//cell wall;GO:0044444//cytoplasmic part	GO:0043169//cation binding;GO:0016791//phosphatase activity	GO:0009267//cellular response to starvation
Unigene0009721	332.842	67.7876	-2.29574	0	0	Hydrophobic protein RCI2B [Medicago truncatula]	0	GO:0031224//intrinsic to membrane	0	GO:0006950//response to stress
Unigene0040137	16.3917	3.34078	-2.29471	1.30237e-11	2.79689e-10	PREDICTED: MATE efflux family protein DTX10like [Glycine max]	0	0	GO:0015291//secondary active transmembrane transporter activity	GO:0015893//drug transport;GO:0044763
Unigene0013677	4.9518	1.0144	-2.28733	1.06362e-06	1.36628e-05	hypothetical protein MTR_5g067050 [Medicago truncatula]	0	0	0	0
Unigene0050740	5.22629	1.07063	-2.28733	1.06362e-06	1.36603e-05	0	0	0	0	0
Unigene0051330	4.31169	0.88327	-2.28733	2.6618e-05	0.000272934	0	0	0	0	0
Unigene0057825	1.87863	0.384847	-2.28733	2.6618e-05	0.000272975	Os03g0739700 [Oryza sativa Japonica Group]	0	0	0	0
Unigene0043497	139.937	28.7088	-2.28521	7.42074e-283	8.93865e-281	EF0hand calcium0binding domain0containing protein 4A [Theobroma cacao]	0	0	0	0
Unigene0006080	5.23982	1.07524	-2.28486	9.20198e-32	5.0288e-30	PREDICTED: cysteine proteinase RD21a0like [Cicer arietinum]	0	0	GO:0070011	GO:0019538//protein metabolic process
Unigene0045342	93.3159	19.1843	-2.2822	1.73512e-88	1.50254e-86	phenylalanine ammonia lyase [Trifolium pratense]	ko00940//Phenylpropanoid biosynthesis;ko00360//Phenylalanine metabolism;ko00910//Nitrogen metabolism	GO:0044424//intracellular part	GO:0016841//ammonia0lyase activity	GO:0009699//phenylpropanoid biosynthetic process;GO:0006558//L0phenylalanine metabolic process
Unigene0031915	6.61822	1.36684	-2.2756	9.1739e-27	4.5331e-25	cytochrome c biogenesis protein [Pisum sativum]	0	0	0	0
[truncated: 2,330 more rows]

## Sheet: Lp-vs-Vp.GeneDiff
GeneID	LP-RPKM	VP-RPKM	log2 Ratio(VP/LP)	P-value	FDR	Description	Pathway	GO Component	GO Function	GO Process
Unigene0003322	26.7986	0.001	-14.7099	5.54816e-115	5.2896e-113	0	0	0	0	0
Unigene0050685	20.4844	0.001	-14.3222	1.03428e-62	6.89971e-61	0	0	0	0	0
Unigene0051812	19.2841	0.001	-14.2351	1.32848e-33	5.71567e-32	0	0	0	0	0
Unigene0053274	12.4562	0.001	-13.6046	1.1757e-27	4.3531e-26	0	0	0	0	0
Unigene0049896	10.6822	0.001	-13.3829	2.78164e-28	1.0416e-26	0	0	0	0	0
[truncated: 6,340 more rows]
