# Supplementary material for: High-Throughput RNA-Seq Data Analysis of the Single Nucleotide Polymorphisms (SNPs) and Zygomorphic Flower Development in Pea (Pisum sativum L.)
Source: Int J Mol Sci. 2017 Dec 20;18(12):2710. doi: 10.3390/ijms18122710 (PMC5751311; doi:10.3390/ijms18122710)
Supplement: Supplementary file 1 [file ijms-18-02710-s001.zip › Table S7.xlsx]

## Sheet: Dp
GeneID	Length	JI2822Dp_RPKM	TereseDp_RPKM	JI2822Lp_RPKM	TereseLp_RPKM	JI2822Vp_RPKM	TereseVp_RPKM	Description	Pathway	GO Component	GO Function	GO Process
Unigene0018425	1729	59.3275	59.7965	1.69552	0.41912	0.628353	0.314062	LST1 [Pisum sativum]	0	GO:0043231//intracellular membrane0bounded organelle	GO:0003676//nucleic acid binding;GO:0001071//nucleic acid binding transcription factor activity	GO:0009791//post0embryonic development;GO:0006351//transcription, DNA0dependent
Unigene0018426	1743	48.2407	64.931	1.79159	0.415753	0	0.38077	CYC1 [Pisum sativum]	0	0	0	0
Unigene0031178	1628	10.2461	5.58202	1.56583	0.85315	0.630261	1.0377	Myb0like protein AA [Medicago truncatula]	0	0	0	0
Unigene0011778	824	12.5972	10.6044	0.850755	0.293147	0.585988	0.439331	MADS box protein M2 [Pisum sativum]	0	0	0	0
Unigene0024128	1966	4.01174	4.12455	1.6532	1.16722	0.614006	0.368269	PREDICTED: LOW QUALITY PROTEIN: wall0associated receptor kinase 20like [Cicer arietinum]	0	GO:0031224//intrinsic to membrane	GO:0046872//metal ion binding;GO:0001871;GO:0004672//protein kinase activity;GO:0032550	GO:0006796//phosphate0containing compound metabolic process;GO:0006464//protein modification process
Unigene0050511	314	10.6824	8.01448	1.62368	1.92319	1.34553	0.576447	PREDICTED: auxin0induced protein 22E0like [Cicer arietinum]	0	GO:0043231//intracellular membrane0bounded organelle	GO:0005515//protein binding	GO:0009755//hormone0mediated signaling pathway;GO:0006351//transcription, DNA0dependent
Unigene0050338	282	5.46508	4.70985	0.677971	1.28486	0.856125	0.855813	0	0	0	0	0
Unigene0049545	297	5.03645	5.88418	0.214577	0	0.406443	0	0	0	0	0	0

## Sheet: Lp
GeneID	Length	JI2822Dp_RPKM	TereseDp_RPKM	JI2822Lp_RPKM	TereseLp_RPKM	JI2822Vp_RPKM	TereseVp_RPKM	Description	Pathway	GO Component	GO Function	GO Process
Unigene0048774	1211	1.68436	1.50083	9.63044	6.6821	0.598085	1.94307	Ovate family protein [Arabidopsis thaliana]	0	0	0	0
Unigene0013081	1547	1.23063	1.44598	5.14943	4.13778	0.156062	0.312009	PREDICTED: growth0regulating factor 50like isoform X1 [Cicer arietinum]	0	GO:0043231//intracellular membrane0bounded organelle	GO:0032550;GO:0016817//hydrolase activity, acting on acid anhydrides	GO:0006351//transcription, DNA0dependent
Unigene0052906	976	1.48616	1.64733	4.11367	4.76423	1.23682	1.54546	PREDICTED: uncharacterized LOC101221076 isoform 2 [Cucumis sativus]	0	0	0	0
Unigene0006474	1290	0.983864	1.78824	8.25023	10.3924	0.374306	1.12251	PREDICTED: corepressor interacting with RBPJ 10like [Cicer arietinum]	0	0	0	GO:0007275//multicellular organismal development
Unigene0050947	669	1.21959	0.208981	19.7189	6.40891	1.08263	0	hypothetical protein MTR_4g116610 [Medicago truncatula]	0	0	0	GO:0016192//vesicle0mediated transport
Unigene0014421	1973	0.413535	0.566886	4.06989	9.02915	0.367097	0	PREDICTED: uncharacterized acetyltransferase At3g502800like [Cicer arietinum]	0	0	GO:0016747//transferase activity, transferring acyl groups other than amino0acyl groups	0
Unigene0035275	313	1.15854	0.446672	4.27577	4.43747	0.771333	0.771052	0	0	0	0	0
Unigene0082746	1183	0.306529	1.18181	6.24903	6.99339	0	0	R2R30MYB transcription factor [Medicago truncatula]	0	0	0	0
Unigene0003322	868	0.156664	0.322139	26.7986	6.81802	0	0.0695101	0	0	0	0	0
Unigene0048668	201	0.451025	0	9.8289	22.5329	0.600565	0.300173	0	0	0	0	0
Unigene0008763	796	0.11389	1.31729	9.60743	11.9107	0.3033	0.454785	Glycosyl hydrolase family 35 protein [Arabidopsis thaliana]	0	0	0	0
Unigene0051179	243	0	0	9.44138	4.72171	0	0	0	0	0	0	0
Unigene0001224	345	0	0	4.80279	10.6773	0	0.174883	Embryonic abundant protein0like protein [Medicago truncatula]	0	0	0	0

## Sheet: Vp
GeneID	Length	JI2822Dp_RPKM	TereseDp_RPKM	JI2822Lp_RPKM	TereseLp_RPKM	JI2822Vp_RPKM	TereseVp_RPKM	Description	Pathway	GO Component	GO Function	GO Process
Unigene0048054	782	0.0579642	0	0	0.0772228	71.3167	11.9589	PREDICTED: LOW QUALITY PROTEIN: protein ZINC INDUCED FACILITATOR0LIKE 10like [Glycine max]	0	GO:0031224//intrinsic to membrane	0	GO:0044763
Unigene0048016	394	0	0	0.323499	0.613078	49.4803	10.5662	PREDICTED: protein ZINC INDUCED FACILITATOR0LIKE 10like isoform 2 [Glycine max]	0	GO:0031224//intrinsic to membrane	0	GO:0044763
Unigene0003034	609	0	0	0	0.594958	42.5173	7.43039	PREDICTED: protein ZINC INDUCED FACILITATOR0LIKE 10like isoform X1 [Cicer arietinum]	0	GO:0031224//intrinsic to membrane	0	GO:0044763
Unigene0049965	843	0.21508	0.248769	0	0.358174	37.5171	11.9524	Pectinesterase/pectinesterase inhibitor [Medicago truncatula]	0	0	GO:0030234//enzyme regulator activity;GO:0052689	GO:0044092//negative regulation of molecular function
Unigene0003367	591	0	0.354843	1.294	1.0218	35.6422	18.7844	Gibberellin0regulated protein [Medicago truncatula]	0	GO:0005618//cell wall	0	GO:0006568//tryptophan metabolic process;GO:0043479;GO:0005976//polysaccharide metabolic process;GO:0045229//external encapsulating structure organization;GO:0009826//unidimensional cell growth;GO:0048588//developmental cell growth;GO:0009683;GO:0009725//response to hormone stimulus
Unigene0050144	273	0	1.53635	0.233441	0.884809	26.0883	30.2779	lipoxygenase [Pisum sativum]	ko00592//alpha0Linolenic acid metabolism;ko00591//Linoleic acid metabolism	GO:0044424//intracellular part	GO:0046914//transition metal ion binding;GO:0016702//oxidoreductase activity, acting on single donors with incorporation of molecular oxygen, incorporation of two atoms of oxygen	GO:0006633//fatty acid biosynthetic process
Unigene0087108	1507	0.18047	0.185545	0.592044	0.601077	24.6714	27.0646	TCP family transcription factor containing protein [Medicago truncatula]	0	0	0	GO:0003006//developmental process involved in reproduction;GO:0010033//response to organic substance;GO:0048827//phyllome development;GO:0009058//biosynthetic process;GO:0048513//organ development;GO:0016070//RNA metabolic process;GO:0007165//signal transduction;GO:0016043//cellular component organization;GO:0006952//defense response
Unigene0030058	226	1.60453	0	0.563976	0.534409	24.57	6.40724	dehydrin 2 [Pisum sativum]	0	0	0	0
Unigene0030059	233	0.778164	0	0	0	22.7957	4.40211	dehydrin 2 [Pisum sativum]	0	0	0	0
Unigene0050951	212	0.213811	0	0	0	19.9291	17.9297	PREDICTED: probable aquaporin SIP2010like [Cicer arietinum]	0	GO:0031224//intrinsic to membrane;GO:0043231//intracellular membrane0bounded organelle	0	GO:0051234//establishment of localization;GO:0042221//response to chemical stimulus
Unigene0050751	420	0	0	0	0	19.113	14.2218	PREDICTED: probable aquaporin SIP2010like [Cicer arietinum]	0	GO:0031224//intrinsic to membrane;GO:0043231//intracellular membrane0bounded organelle	0	GO:0051234//establishment of localization;GO:0042221//response to chemical stimulus
Unigene0044851	1102	0.32906	1.52241	0.115661	0.87678	18.7862	26.6634	PREDICTED: uncharacterized LOC101222618 [Cucumis sativus]	0	0	0	0
Unigene0039022	208	0.65377	0	0	0	17.991	11.6028	0	0	0	0	0
Unigene0084236	1818	1.57077	0.384511	1.5424	0.465036	16.9982	9.29249	OSJNBb0116K07.10 [Oryza sativa Japonica Group]	0	0	0	0
Unigene0019923	2248	0.120982	0.124385	0.283493	0.483535	15.841	17.6871	Glutamyl0tRNA(Gln) amidotransferase subunit A [Medicago truncatula]	0	0	GO:0016879//ligase activity, forming carbon0nitrogen bonds	0
Unigene0003161	253	0	0	0	0	14.791	15.2626	PREDICTED: probable aquaporin SIP2010like [Cicer arietinum]	0	GO:0031224//intrinsic to membrane;GO:0043231//intracellular membrane0bounded organelle	0	GO:0051234//establishment of localization;GO:0042221//response to chemical stimulus
Unigene0009173	779	1.68744	0.448678	0.245427	0.930242	14.5662	22.6159	PREDICTED: fatty acyl0CoA reductase 30like [Cicer arietinum]	0	0	GO:0034062//RNA polymerase activity;GO:0016620//oxidoreductase activity, acting on the aldehyde or oxo group of donors, NAD or NADP as acceptor	GO:0009059//macromolecule biosynthetic process
Unigene0050721	301	0	0.464479	0.211725	0.40125	14.237	14.4322	TCP family transcription factor containing protein [Medicago truncatula]	0	0	0	0
Unigene0007710	883	0.821346	0.554166	0	0.478729	12.8506	12.7776	Stress responsive alpha0beta barrel domain protein [Arabidopsis thaliana]	0	GO:0009532//plastid stroma;GO:0042579//microbody	0	GO:0000097//sulfur amino acid biosynthetic process;GO:0008380//RNA splicing;GO:0019758
Unigene0084705	292	0.310466	1.43639	0.218251	1.86128	12.8155	17.3566	lipoxygenase [Pisum sativum]	ko00592//alpha0Linolenic acid metabolism;ko00591//Linoleic acid metabolism	0	0	0
Unigene0051577	222	0	0.94465	0	0.272019	11.9626	10.8711	PREDICTED: RING0H2 finger protein ATL470like [Cicer arietinum]	0	0	GO:0046914//transition metal ion binding	0
Unigene0052326	214	0.211813	0	0.2978	1.41094	11.5637	16.3524	lipoxygenase [Pisum sativum]	0	GO:0044424//intracellular part	GO:0046914//transition metal ion binding;GO:0016702//oxidoreductase activity, acting on single donors with incorporation of molecular oxygen, incorporation of two atoms of oxygen	GO:0006633//fatty acid biosynthetic process
Unigene0050413	642	0.494231	0	0.0992668	0.658438	10.9056	18.6079	DNA0directed RNA polymerase [Medicago truncatula]	0	0	GO:0016620//oxidoreductase activity, acting on the aldehyde or oxo group of donors, NAD or NADP as acceptor	0
Unigene0051772	552	1.5602	1.13974	0	0.437596	10.4968	11.4767	PREDICTED: ABC transporter G family member 150like [Glycine max]	0	0	GO:0017111//nucleoside0triphosphatase activity;GO:0032550	GO:0009154
Unigene0050159	317	0.142991	0	0.201039	0.380998	10.2816	5.70992	ripening0related protein [Pisum sativum]	0	0	0	GO:0006950//response to stress
Unigene0012024	352	0.90141	0.397182	0.181049	1.02934	9.43075	14.0553	pherophorin0dz1 protein [Volvox carteri f. nagariensis]	0	0	0	0
Unigene0048118	314	0.866141	0.890498	1.21776	1.34623	9.41873	7.30166	PREDICTED: cytochrome P450 86B10like [Cicer arietinum]	0	0	GO:0046872//metal ion binding;GO:0004497//monooxygenase activity;GO:0016705//oxidoreductase activity, acting on paired donors, with incorporation or reduction of molecular oxygen	0
Unigene0054108	606	0	0	0	0.398602	8.16709	10.3545	0	0	0	0	0
Unigene0001972	729	0.37307	0	0.26226	0.414185	7.78263	4.22095	Aquaporin PIP201 [Medicago truncatula]	0	0	0	0
Unigene0049889	892	0.254081	0.0783678	0.142891	0.0676998	7.6461	9.60487	pherophorin0dz1 protein [Volvox carteri f. nagariensis]	0	GO:0043231//intracellular membrane0bounded organelle	0	0
Unigene0011602	812	1.61886	0.602621	1.56969	1.7105	7.58176	7.20748	PREDICTED: ethylene0responsive transcription factor ERF0230like [Cicer arietinum]	0	0	0	0
Unigene0009843	733	1.36046	0.762937	0.173886	0.16477	7.57548	4.0333	Ethylene0responsive transcription factor SHINE [Medicago truncatula]	0	GO:0043231//intracellular membrane0bounded organelle	GO:0003676//nucleic acid binding;GO:0001071//nucleic acid binding transcription factor activity	GO:0006351//transcription, DNA0dependent
Unigene0051120	398	1.36667	1.58075	1.28099	0.758646	7.43086	5.15423	20succinylbenzoate0CoA ligase [Medicago truncatula]	0	0	GO:0016874//ligase activity	0
Unigene0054292	708	0.512181	0.987346	0	0.341176	6.56423	11.9306	PREDICTED: plastidic ATP/ADP0transporter0like [Cicer arietinum]	0	0	0	0
Unigene0053765	273	0.664147	0.512118	0.700322	1.32721	6.41153	4.19913	0	0	0	0	0
Unigene0056087	231	0.39245	0	0.827653	0.522842	6.27084	6.26855	0	0	0	0	0
Unigene0015541	281	0.483929	0	1.58756	0.644714	6.0142	4.29429	PREDICTED: GDSL esterase/lipase At1g296700like [Cicer arietinum]	0	GO:0030312//external encapsulating structure;GO:0031976;GO:0005576//extracellular region	GO:0016787//hydrolase activity	GO:0006631//fatty acid metabolic process;GO:0009414//response to water deprivation;GO:0007275//multicellular organismal development
Unigene0058867	565	0	0.61862	0.22559	0.213764	5.87544	4.05792	0	0	0	0	0
Unigene0082797	1439	1.35449	1.31161	1.59434	1.30093	5.8721	5.61839	PREDICTED: GDSL esterase/lipase At2g429900like [Cicer arietinum]	0	0	0	0
Unigene0054837	241	0	0.580117	0.264437	0	5.76019	5.00704	Cyclic nucleotide gated channel [Medicago truncatula]	ko04626//Plant0pathogen interaction	GO:0031224//intrinsic to membrane	GO:0005267//potassium channel activity;GO:0032550;GO:0005515//protein binding;GO:0017111//nucleoside0triphosphatase activity;GO:0000166//nucleotide binding	GO:0009696//salicylic acid metabolic process;GO:0030001//metal ion transport;GO:0009755//hormone0mediated signaling pathway;GO:0042743//hydrogen peroxide metabolic process;GO:0006605//protein targeting;GO:0010243//response to organic nitrogen;GO:0009626//plant0type hypersensitive response;GO:0009627//systemic acquired resistance
Unigene0058046	208	0	0	0	0	5.22318	4.93121	ripening0related protein [Pisum sativum]	0	0	0	GO:0006950//response to stress
Unigene0015897	491	0.646224	1.42371	1.03836	1.10691	5.03998	6.75848	0	0	0	0	0
Unigene0037942	506	1.4333	1.79595	0.377842	1.43213	4.89057	5.00803	PREDICTED: probable polyadenylate0binding protein At2g366600like [Cicer arietinum]	0	0	GO:0036094;GO:0008135//translation factor activity, nucleic acid binding	0
Unigene0083675	1240	1.5353	1.57848	0.976497	1.60711	4.86748	4.33048	PREDICTED: DUF246 domain0containing protein At1g049100like [Glycine max]	0	0	0	0
Unigene0028692	225	1.00729	1.24274	0	0.268392	4.82854	5.09494	PREDICTED: WAT10related protein At3g280500like isoform X3 [Cicer arietinum]	0	0	0	0
Unigene0001848	673	1.4144	1.76578	1.51511	1.88433	4.75321	4.66183	Short internodes [Medicago truncatula]	0	0	0	0
Unigene0053482	343	0.528607	0.407604	0.371599	0.352118	4.75112	14.6	PREDICTED: plastidic ATP/ADP0transporter0like [Glycine max]	0	0	0	0
Unigene0055295	608	1.19284	0.804817	1.46745	0.794582	4.66574	4.2671	0	0	0	0	0
Unigene0056421	209	0.433761	0	0	0	4.62062	4.04157	PREDICTED: probable cyclic nucleotide0gated ion channel 20, chloroplastic0like isoform X2 [Cicer arietinum]	0	GO:0031224//intrinsic to membrane	GO:0015075//ion transmembrane transporter activity	GO:0044765;GO:0044763
Unigene0048860	465	0.779837	0.751657	0	1.68827	4.54298	6.87687	PREDICTED: squamosa promoter0binding0like protein 13A0like isoform X1 [Cicer arietinum]	0	0	0	0
Unigene0022971	1320	0.686788	1.05915	1.25527	1.37246	4.48103	6.26202	PREDICTED: LOW QUALITY PROTEIN: peroxidase 190like [Cicer arietinum]	ko00680//Methane metabolism;ko00940//Phenylpropanoid biosynthesis;ko00360//Phenylalanine metabolism	GO:0043231//intracellular membrane0bounded organelle	GO:0046906//tetrapyrrole binding;GO:0016209//antioxidant activity;GO:0043169//cation binding;GO:0003824//catalytic activity	GO:0006950//response to stress;GO:0044710
Unigene0051934	566	0.961018	0.494022	0.900767	1.92047	4.47877	5.11673	Ethylene0responsive transcription factor ERF061 [Medicago truncatula]	0	GO:0043231//intracellular membrane0bounded organelle	GO:0003676//nucleic acid binding;GO:0001071//nucleic acid binding transcription factor activity	GO:0010243//response to organic nitrogen;GO:0006351//transcription, DNA0dependent;GO:0006812//cation transport
Unigene0081830	719	1.70217	0.388896	1.94999	1.93175	4.36516	6.04187	RNA0binding region RNP01 (RNA recognition motif); Calcium0binding EF0hand [Medicago truncatula]	0	0	0	0
Unigene0001246	296	0.612541	0.472325	1.07651	1.4281	4.28207	6.72652	hypothetical protein MTR_6g026820 [Medicago truncatula]	0	0	0	0
Unigene0008077	269	1.85356	1.81907	1.89529	0.448983	4.26312	5.83162	PREDICTED: probable acyl0activating enzyme 60like [Cicer arietinum]	0	0	GO:0016405//CoA0ligase activity	0
Unigene0027159	345	1.18247	0.810482	0	0.525115	4.19873	6.29581	Cold and drought0regulated protein CORA [Medicago truncatula]	0	0	0	0
Unigene0053028	302	1.80111	0.925882	1.68819	1.59969	4.197	4.39525	PREDICTED: leucine0rich repeat receptor0like protein kinase PXL10like [Glycine max]	0	GO:0031224//intrinsic to membrane	GO:0032550;GO:0016628//oxidoreductase activity, acting on the CH0CH group of donors, NAD or NADP as acceptor;GO:0004702//receptor signaling protein serine/threonine kinase activity	GO:0048437//floral organ development;GO:0009886//post0embryonic morphogenesis;GO:0044710;GO:0010065;GO:0007167//enzyme linked receptor protein signaling pathway;GO:0006464//protein modification process;GO:0006796//phosphate0containing compound metabolic process;GO:0009607//response to biotic stimulus

## Sheet: Dp and Lp
GeneID	Length	JI2822Dp	TereseDp	JI2822Lp	TereseLp	JI2822Vp	TereseVp	Description
Unigene0043637	424	4.38313	5.11091	280.018	159.231	0.996456	0.996093	PREDICTED: squamosa promoter0binding0like protein 50like isoform X2 [Cicer arietinum]
Unigene0048351	1477	13.135	15.855	19.6322	17.3355	0.0817289	0.0408496	keeled wing [Pisum sativum]
Unigene0021940	308	4.12073	7.0358	15.3116	6.86229	1.95964	1.95892	0
Unigene0005297	1123	6.57922	4.54408	14.9818	11.8303	1.61238	1.07453	MYB transcription factor MYB127 [Glycine max]
Unigene0002793	799	14.5799	11.0237	14.1975	6.3487	0.151081	0.151026	Os03g0665700 [Oryza sativa Japonica Group]
Unigene0048960	648	11.8217	6.25685	14.0637	7.54852	1.49029	1.30353	0
Unigene0013704	1550	10.9372	11.2298	10.1967	8.61019	1.55759	1.05099	cytochrome P450 enzyme [Pisum sativum]
Unigene0040451	280	4.37092	4.49383	9.33179	6.47016	1.50892	1.50837	PREDICTED: abscisic acid receptor PYL90like isoform X2 [Cicer arietinum]
Unigene0006782	575	4.41456	8.14535	9.19918	13.1279	0.839747	0.734511	PREDICTED: growth0regulating factor 50like isoform X1 [Cicer arietinum]
Unigene0048229	623	8.00334	15.4844	8.59271	7.85143	1.55009	1.84007	SBP [Medicago truncatula]
Unigene0045020	738	7.92319	8.14601	8.20363	4.50048	0.981411	1.7986	Auxin0induced protein 5NG4 [Medicago truncatula]
Unigene0031998	529	4.02725	4.36075	5.90309	4.22375	1.02686	1.59676	Sacsin [Medicago truncatula]
Unigene0020935	1440	5.88635	8.15548	4.24862	7.6324	0.251487	1.84356	0

## Sheet: Dp and Vp
GeneID	Length	JI2822Dp	TereseDp	JI2822Lp	TereseLp	JI2822Vp	TereseVp	Description
Unigene0013109	981	4.52818	7.41083	1.68905	1.53894	10.0902	7.19589	PREDICTED: protein TRANSPARENT TESTA 120like [Cicer arietinum]
Unigene0018801	1377	6.68234	4.11201	1.20331	0.350839	17.3575	9.771	PREDICTED: O0acyltransferase WSD10like [Cicer arietinum]
Unigene0019000	1461	6.01892	4.35405	0.741545	0.620002	6.03155	4.58396	MYB transcription factor [Medicago truncatula]
Unigene0033657	883	5.90342	5.14583	0.938257	1.57297	17.0202	14.5541	PREDICTED: methylsterol monooxygenase 1010like [Cicer arietinum]
Unigene0036725	287	6.15956	9.25559	0.444107	1.68329	8.20179	5.6761	Receptor0like serine/threonine kinase [Medicago truncatula]
Unigene0036730	334	7.87133	15.0691	1.14484	1.44642	8.1319	5.59994	PREDICTED: probable leucine0rich repeat receptor0like serine/threonine0protein kinase At3g148400like isoform X3 [Cicer arietinum]

## Sheet: Lp and Vp
GeneID	Length	JI2822Dp	TereseDp	JI2822Lp	TereseLp	JI2822Vp	TereseVp	Description
Unigene0004407	2196	1.79578	1.59162	5.63	4.06988	6.04667	5.38507	Pollen Ole e 1 allergen and extensin family protein [Theobroma cacao]
Unigene0048925	361	0.50225	1.74276	4.76646	8.19674	6.68773	11.365	PREDICTED: peptide transporter PTR30A0like [Cicer arietinum]
