# Supplementary material for: High-Throughput RNA-Seq Data Analysis of the Single Nucleotide Polymorphisms (SNPs) and Zygomorphic Flower Development in Pea (Pisum sativum L.)
Source: Int J Mol Sci. 2017 Dec 20;18(12):2710. doi: 10.3390/ijms18122710 (PMC5751311; doi:10.3390/ijms18122710)
Supplement: Supplementary file 1 [file ijms-18-02710-s001.zip › Table S8.xlsx]

## Sheet: Sheet1
Primers for qRT-PCR
PsCYC1-f	ATTGGGCGGTTGCTGATTATGCTG
PsCYC1-r	TGTATGAATCTTGCTGTGCCGGTC
PsCYC2-f	CCTTATATTCCAACTCACCATCACC
PsCYC2-r	CATAGTGAGAACCACCACCAAGAG
Dp-MADS-f	AGGTATTCATATGCGGAGAGGCA
Dp-MADS-r	ACTTAAGCCATCAAGTTCTTCACCC
Dp-MYB-f	CCCACTTGGGAATAGTATGTCC
Dp-MYB-r	CACCACTCATGTGAGGTAAACC
PsCYC3-f	CTGATACCGCAATCAAAGAACTCGCC
PsCYC3-r	CACCTCCGGAGAACGATTTGTTGCTA
Dp-Lp-MYB-f	GGTTGGTAGCATCAACACAAACAC
Dp-Lp-MYB-r	CTGCACAAACTTCAACTTGGGTTG
Lp-MYB-f	ATGGCAACATCATCAGCAGCAG
Lp-MYB-r	GGCTTCTGCAGCCACAATTTGA
Vp-TCP-f	CGATATCGATAAACTTCCTCCGCTTC
Vp-TCP-r	GAAGAGTTAGGATCATACATAGGACC
PsActin-f	CACAATTGGCGCTGAAAGAT
PsActin-r	TAATTGAGTTAAATGTCGTCTCATGGAT
